# Supplementary material for: Identification of infectious agents in early marine Chinook and Coho salmon associated with cohort survival
Source: Atypon-hosted journal article supplement (doi:10.1139/facets-2021-0102), 2022-01-01

## **Supplementary Material 2: Chinook survival model figures**

### **"Identification of infectious agents in early marine Chinook and Coho salmon associated with cohort survival"**

Arthur L. Bass, Andrew W. Bateman, Brendan M. Connors, Benjamin A. Staton, Eric B. Rondeau, Gideon J. Mordecai, Amy K. Teffer, Karia H. Kaukinen, Shaorong Li, Amy M. Tabata, David A. Patterson, Scott G. Hinch, Kristina M. Miller

**Description:** Bayesian multi-level model results from Chinook survival models. Raw data (points) are presented in left panels and model results are presented in right panels (heavy black line indicates the posterior distribution of the hyperdistribution mean). Lines in left panels represent 1000 random draws from the posterior distributions of the stock-specific intercepts and slopes. Slope coefficient for the right panel is relative to a 10% increase in pathogen prevalence.

### Salmon Pescarenavirus 1 SpSu

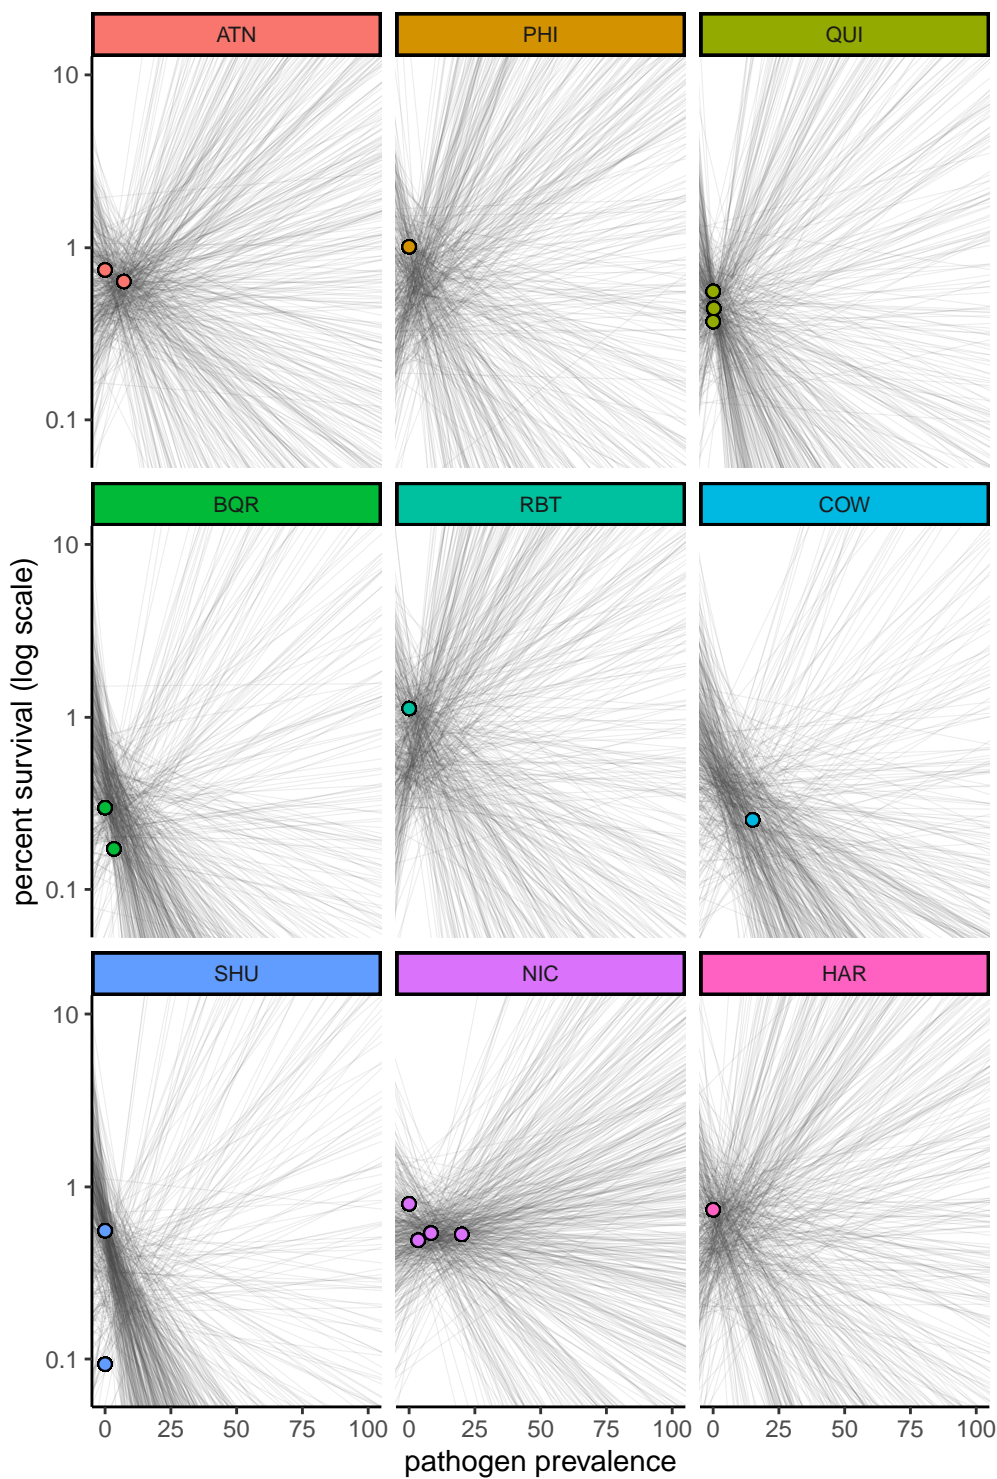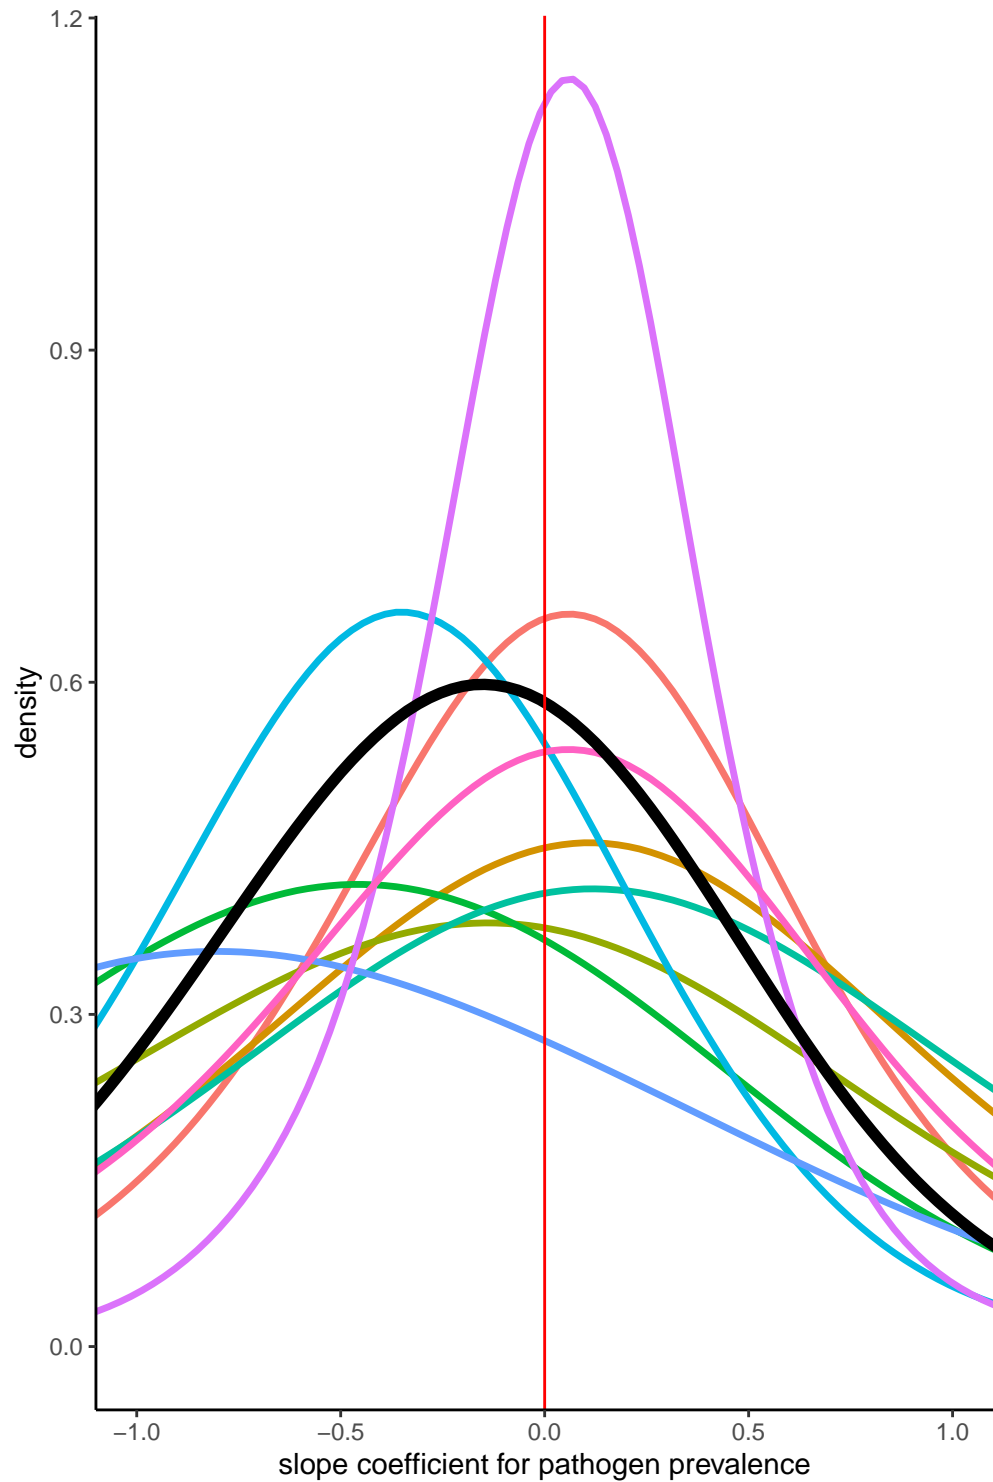

# Salmon Pescarenavirus 1 FaWi

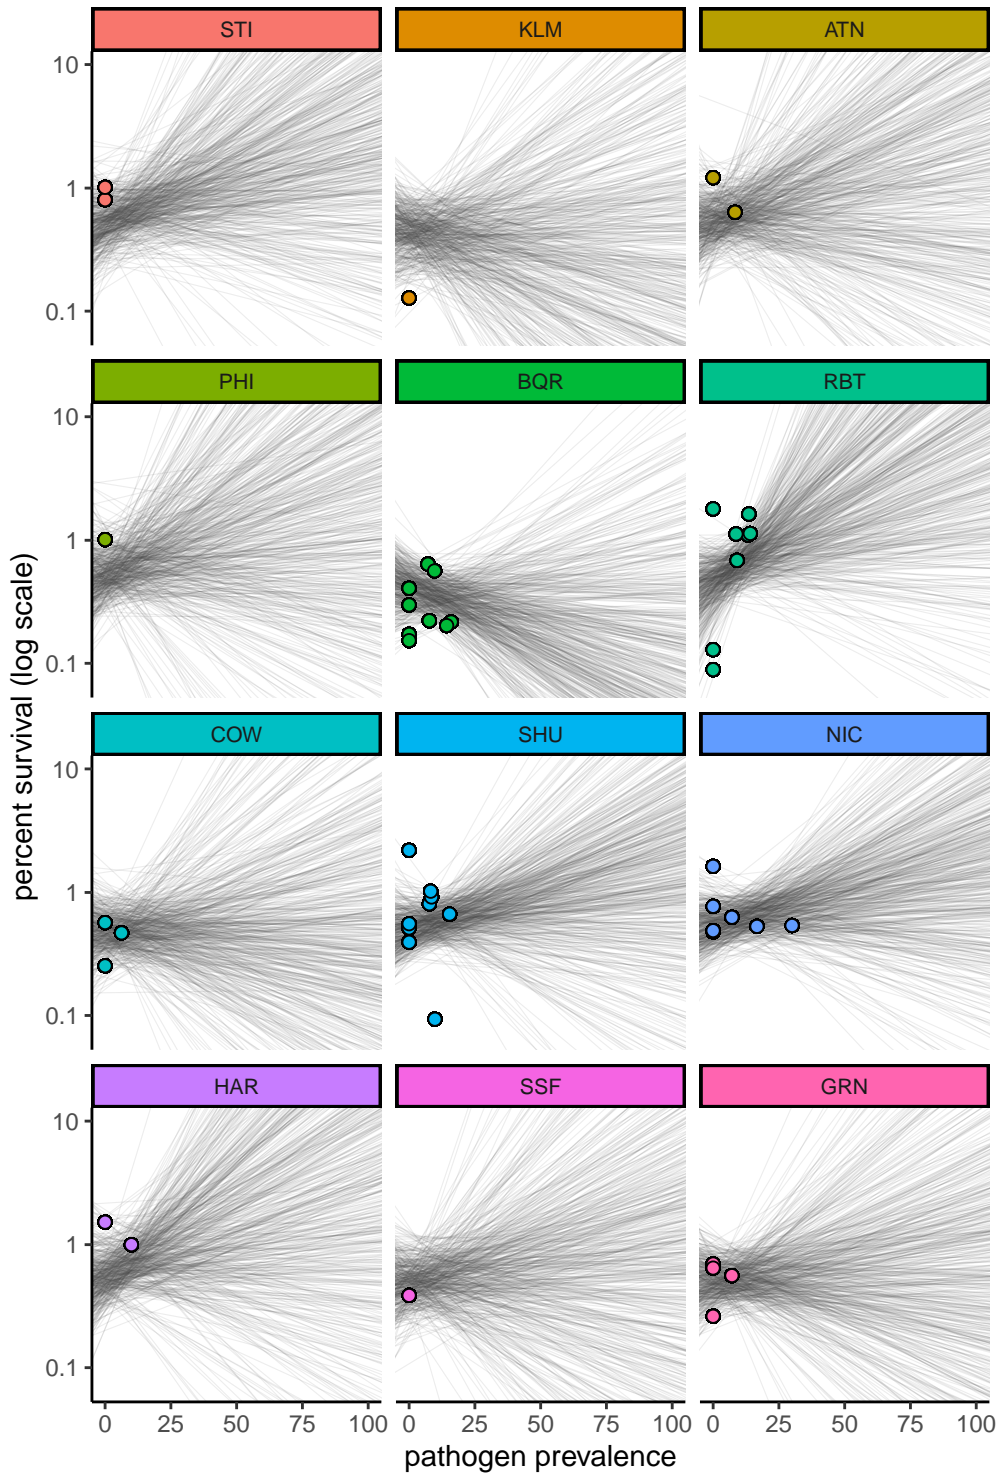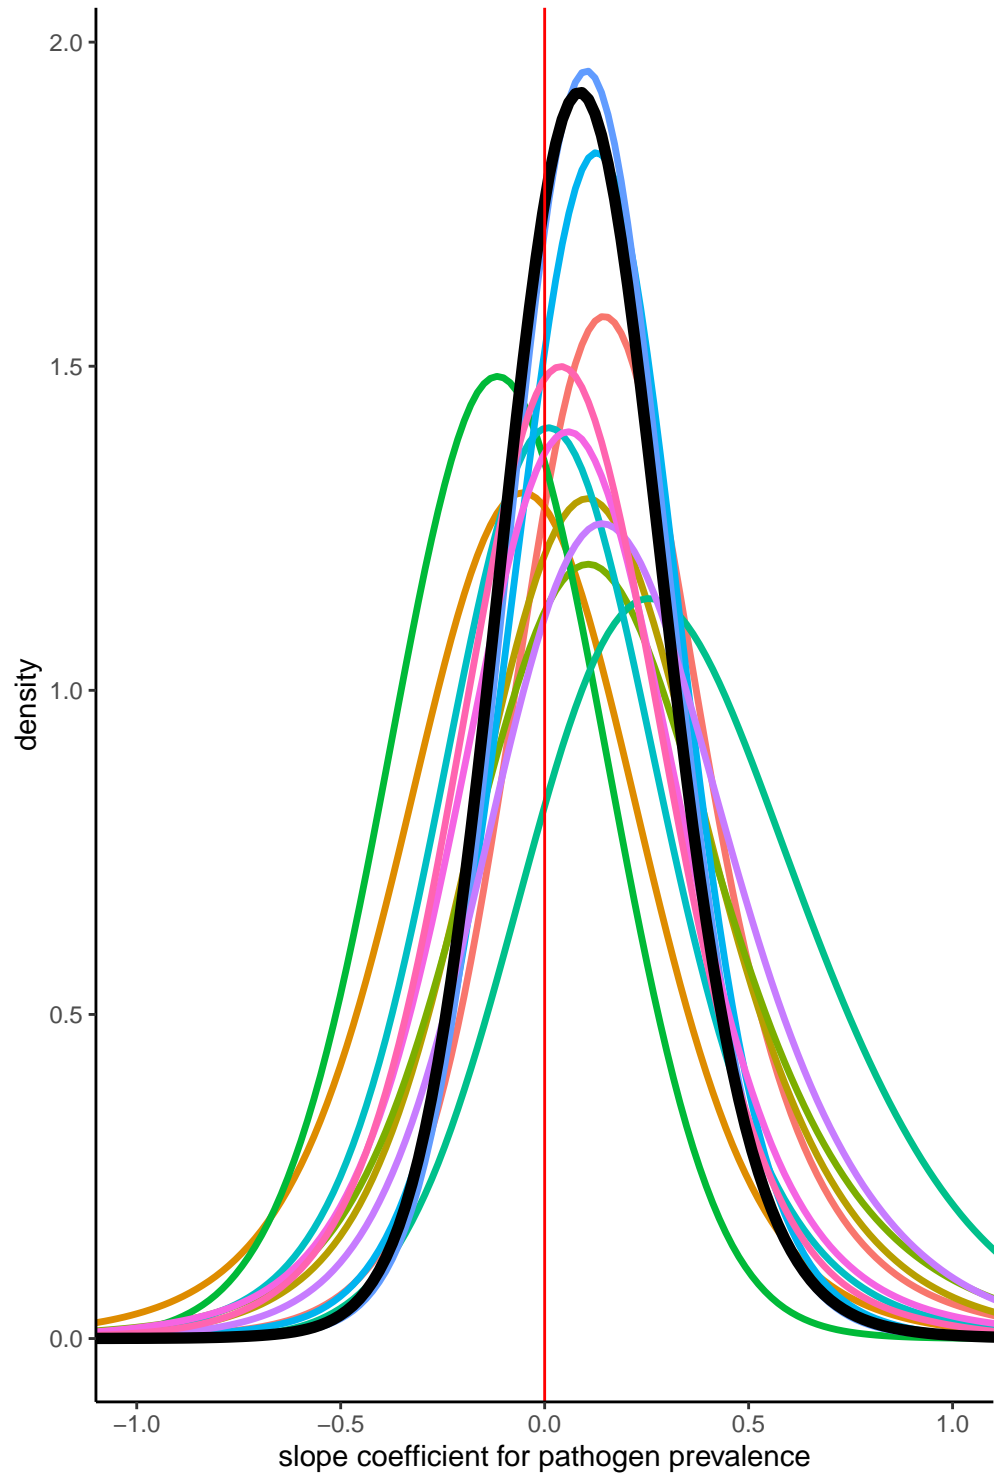

Candidatus Branchiomonas cysticola SpSu

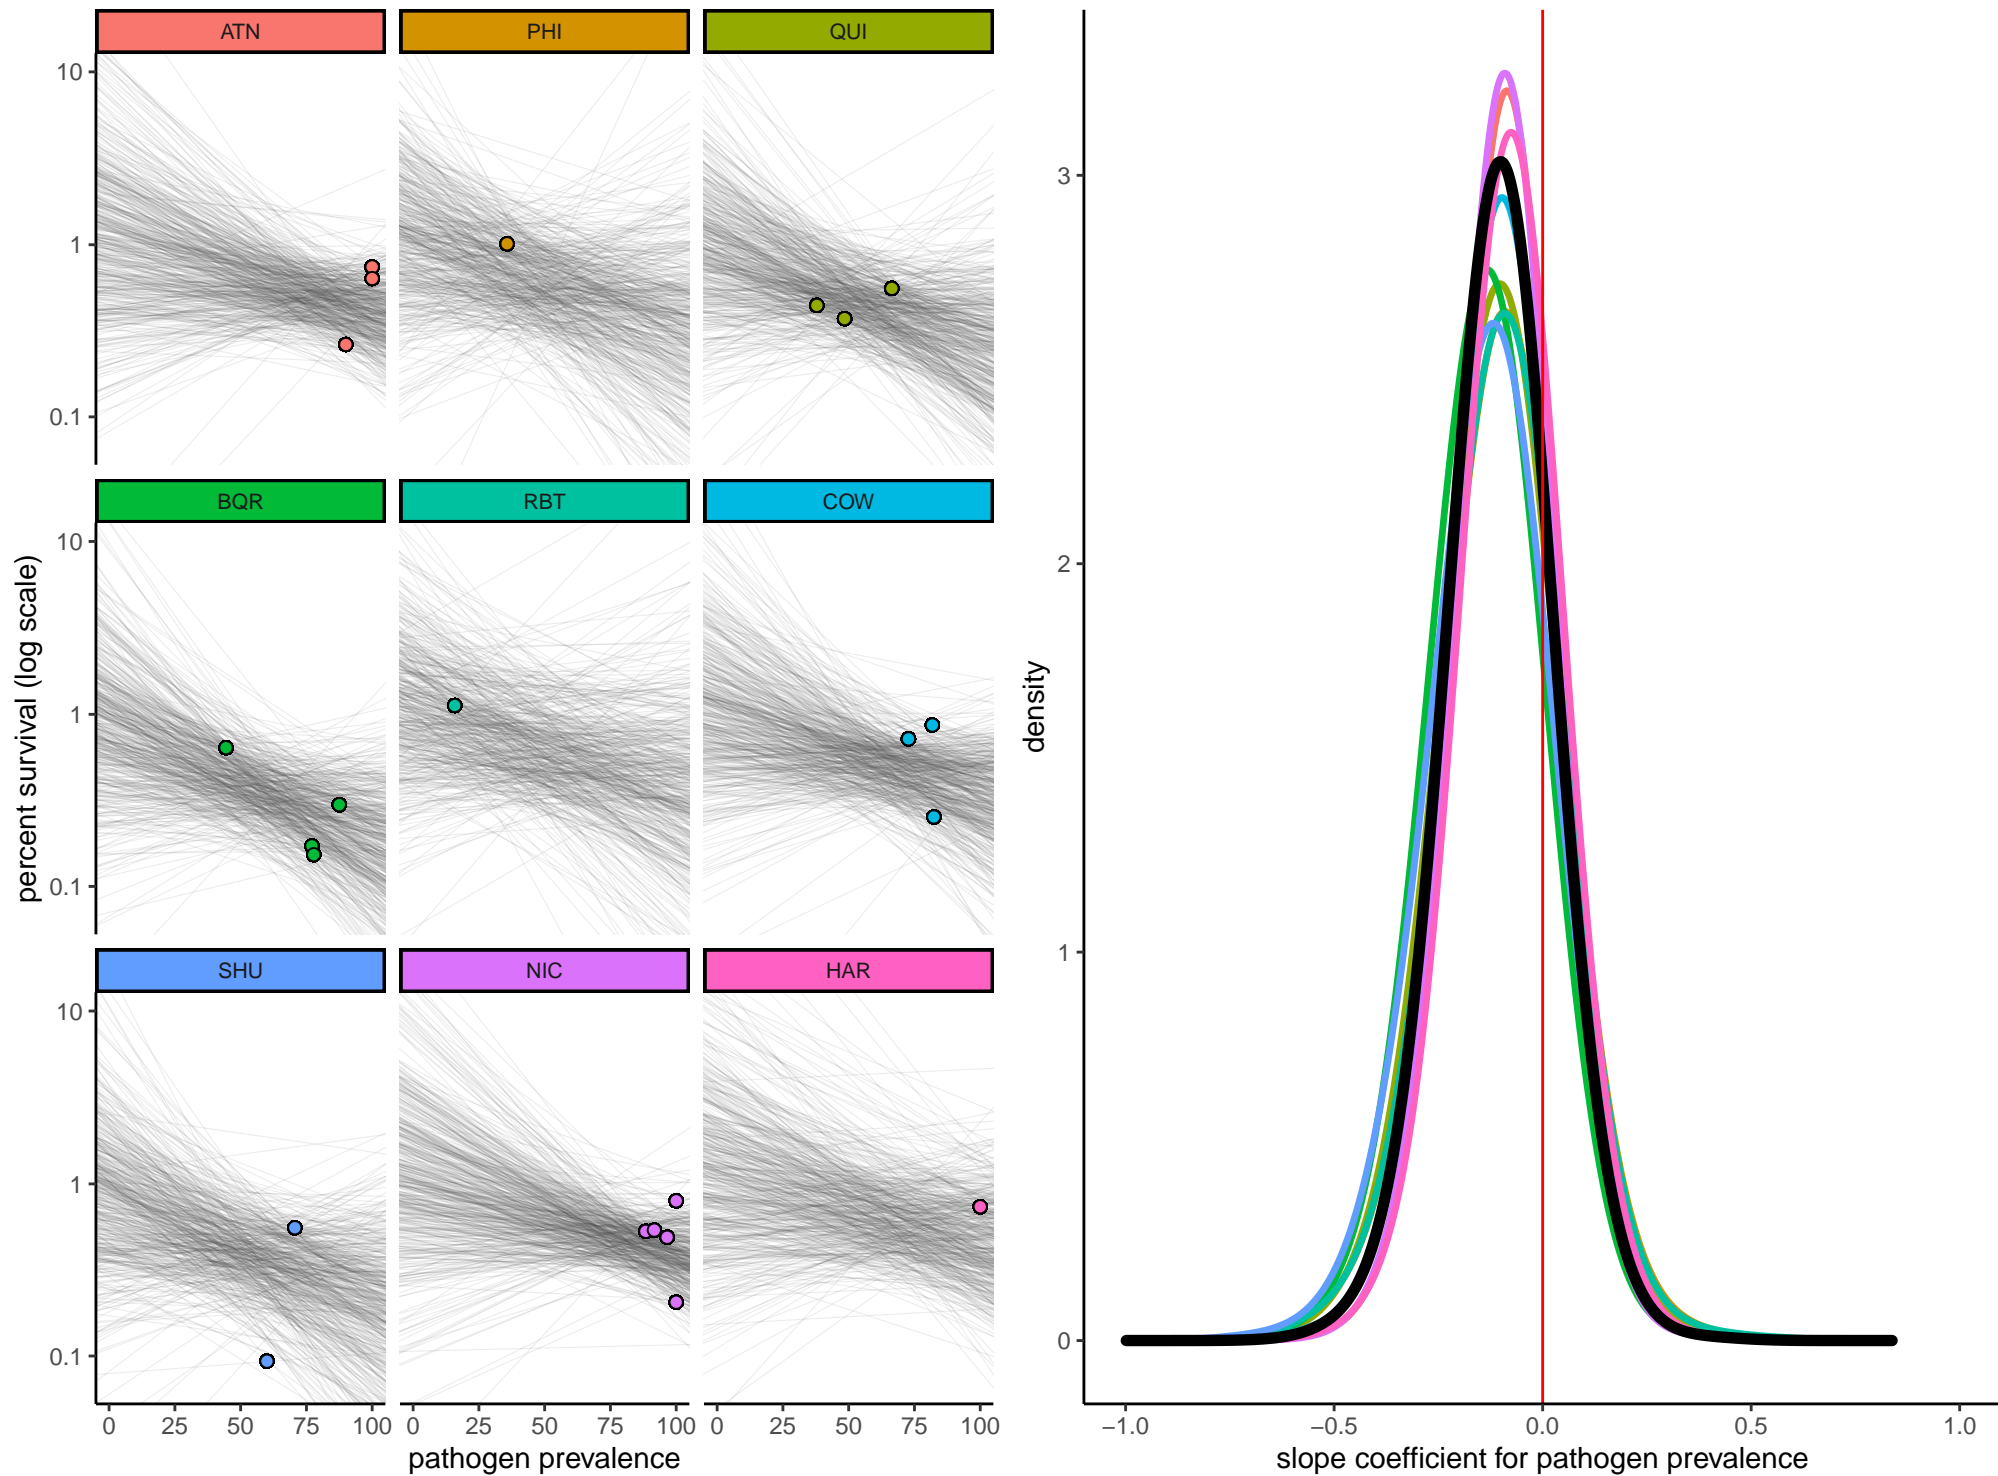

Candidatus Branchiomonas cysticola FaWi

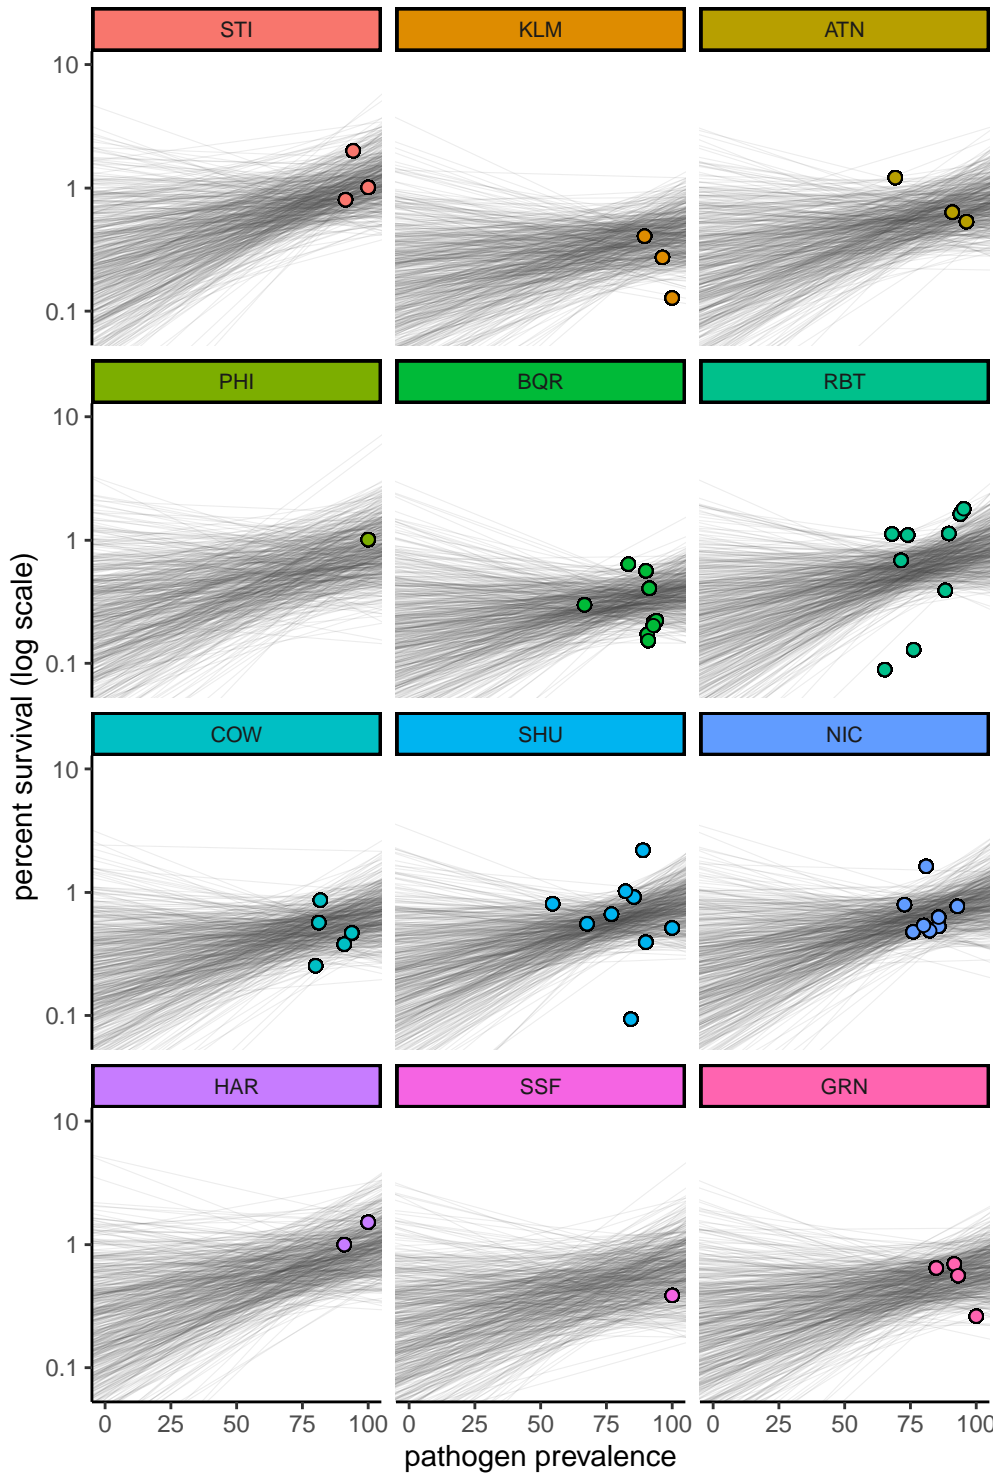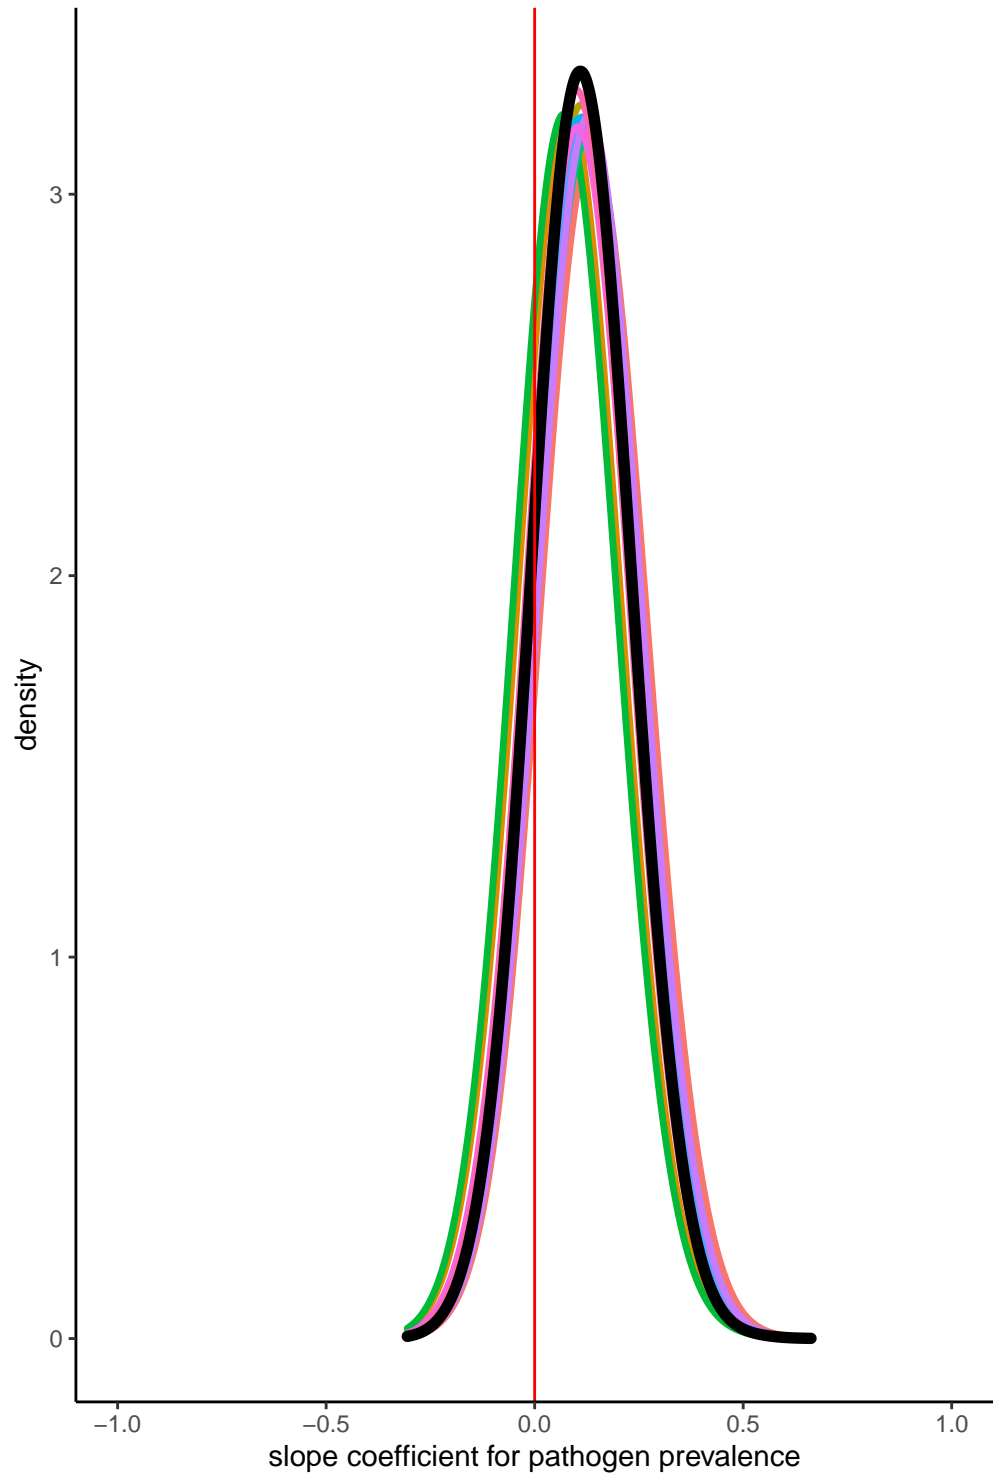

Ceratonova shasta SpSu

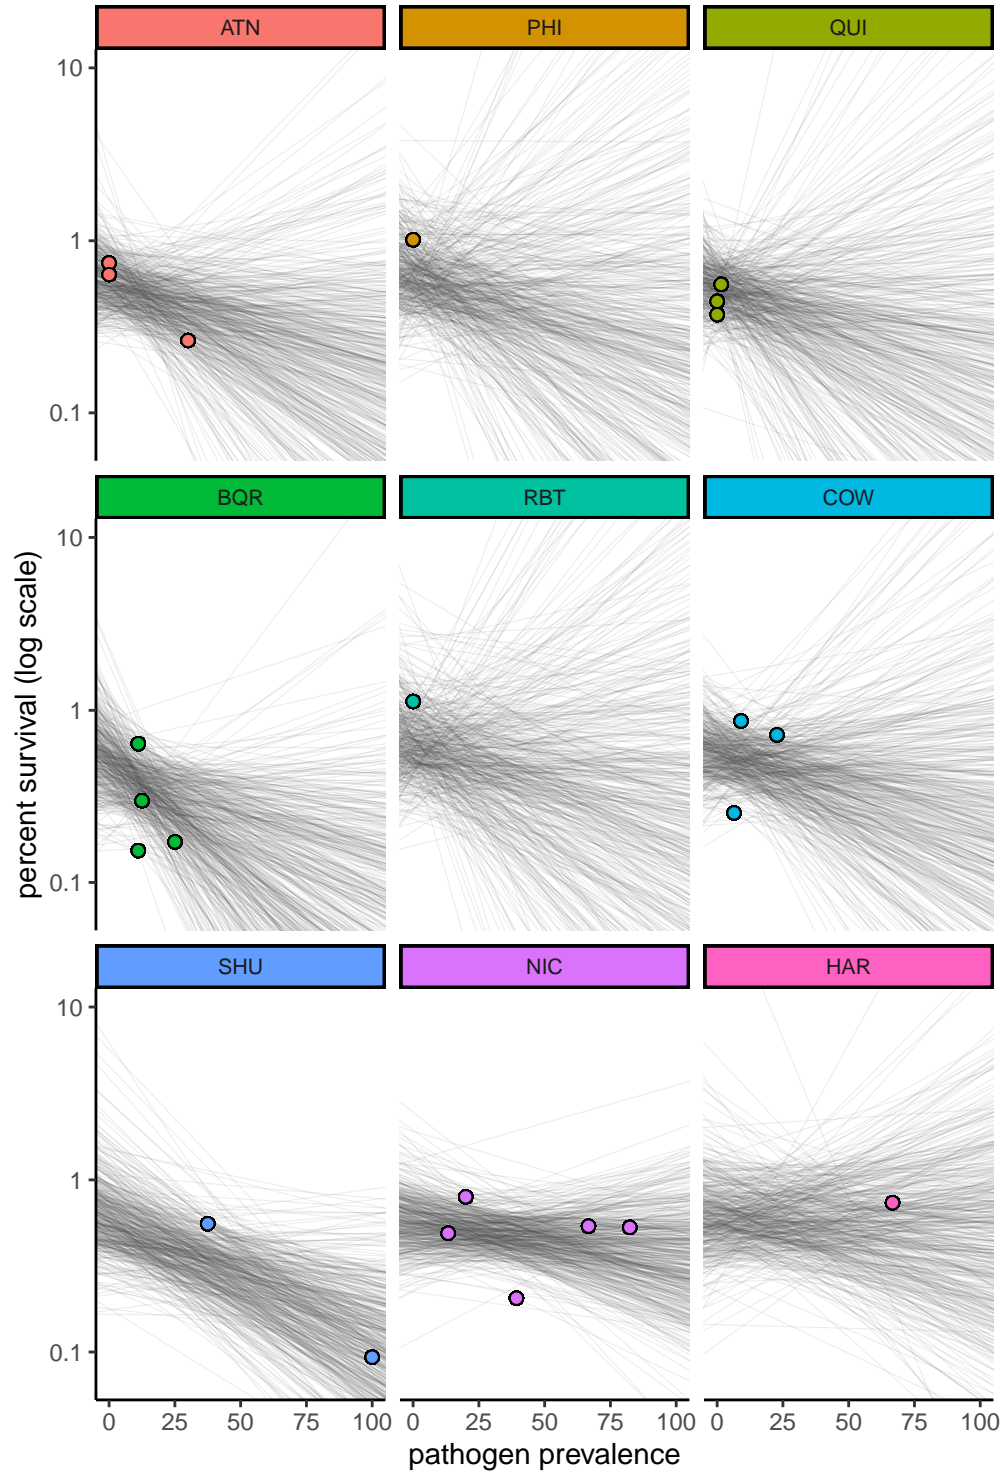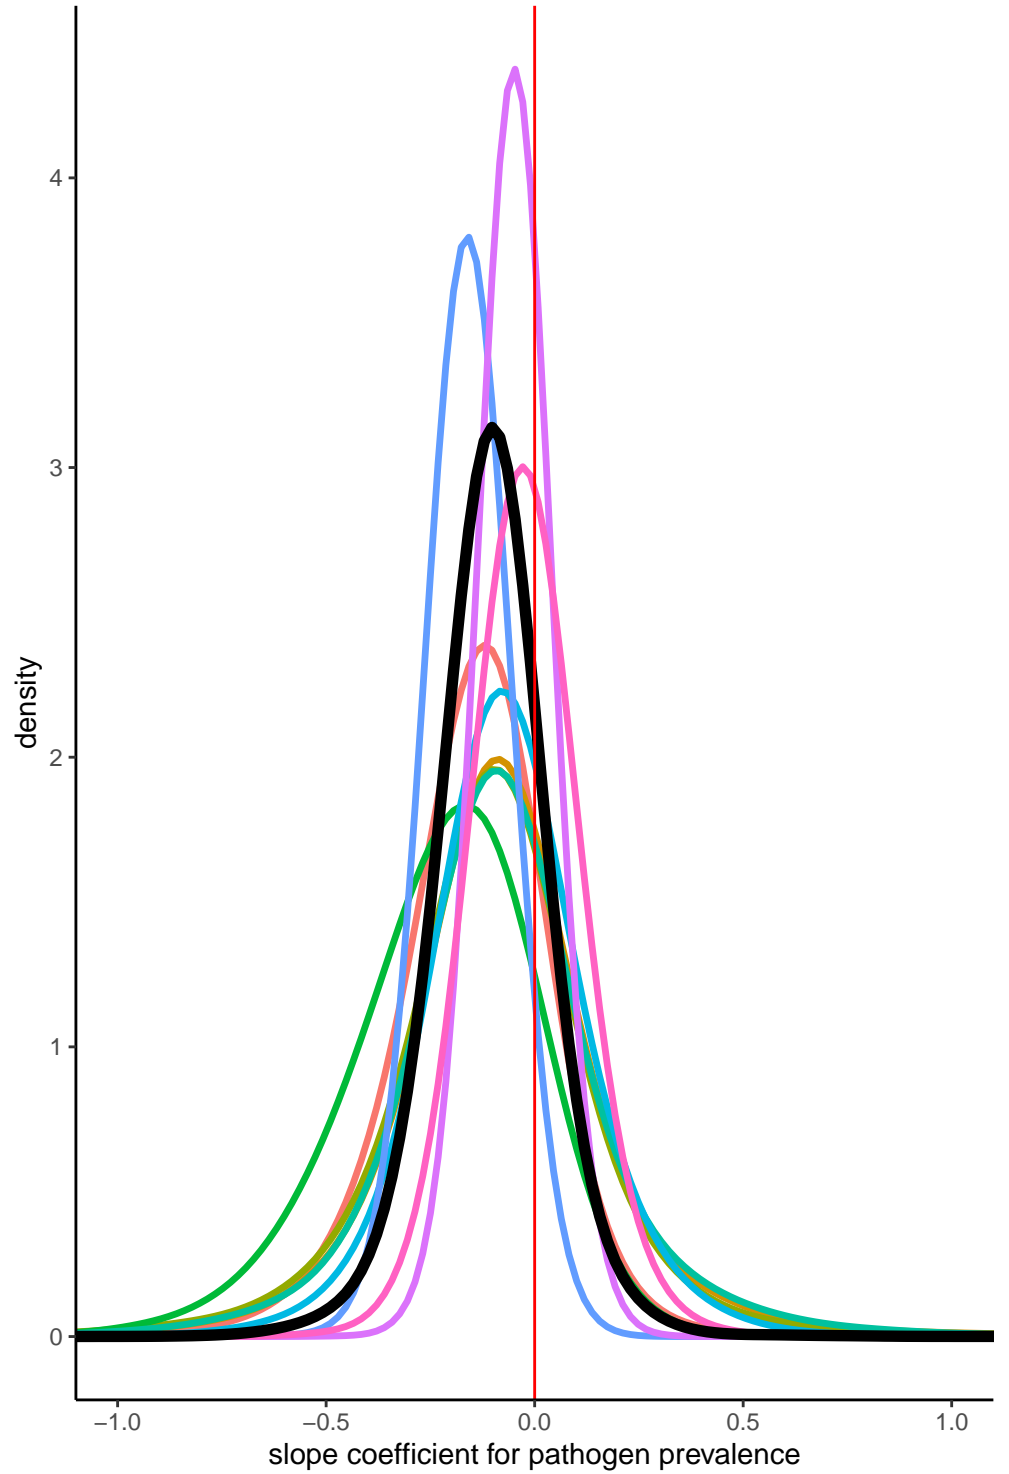

Ceratonova shasta FaWi

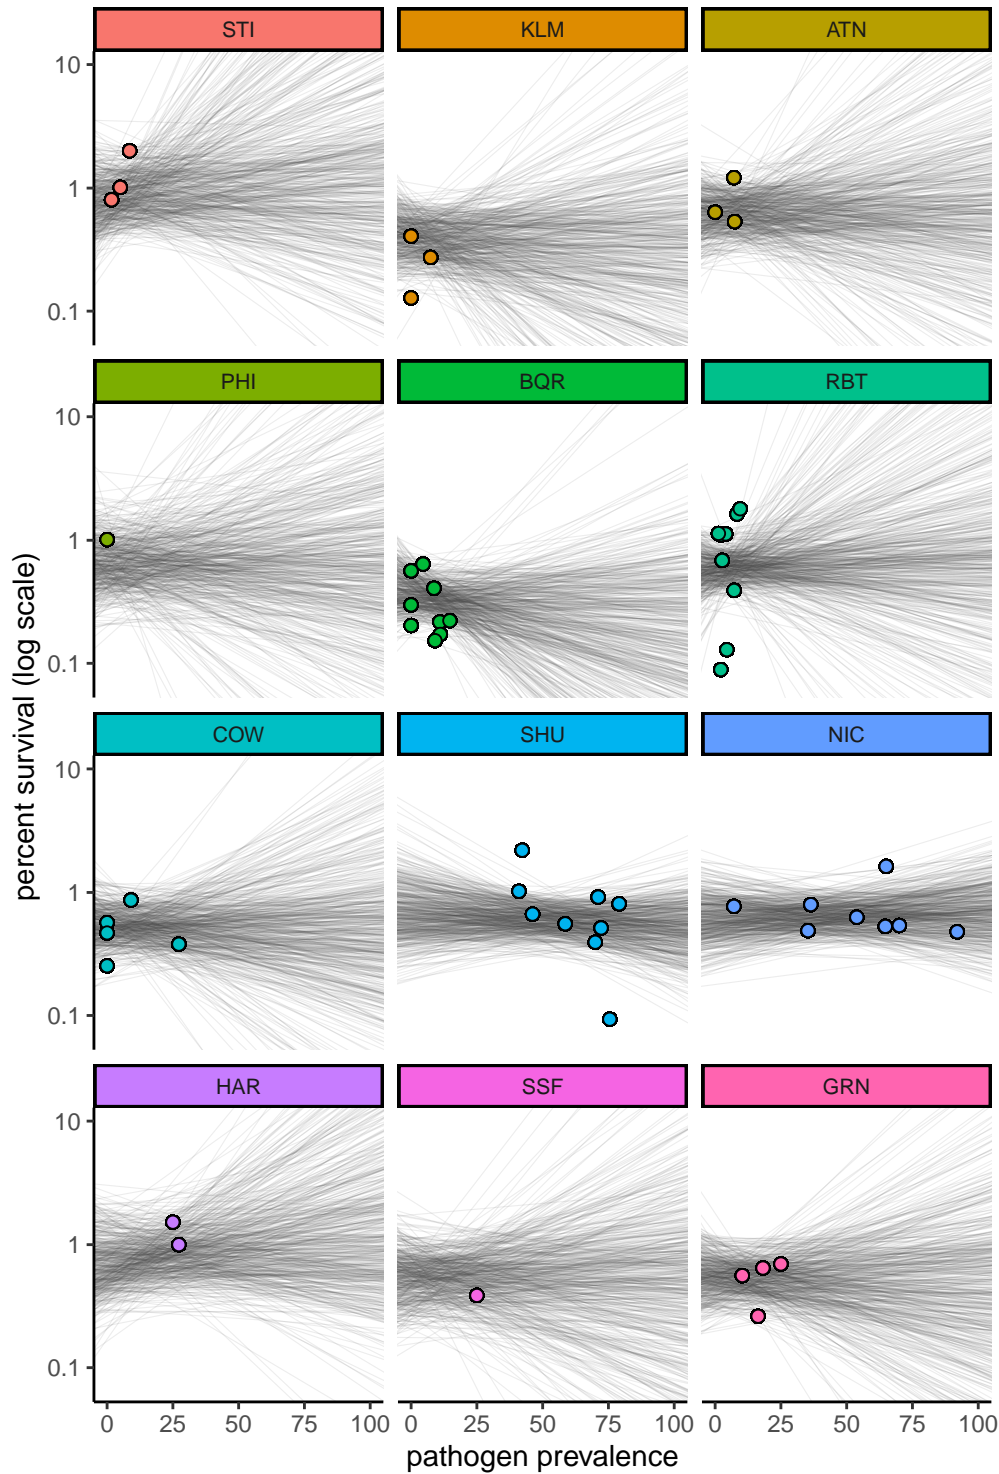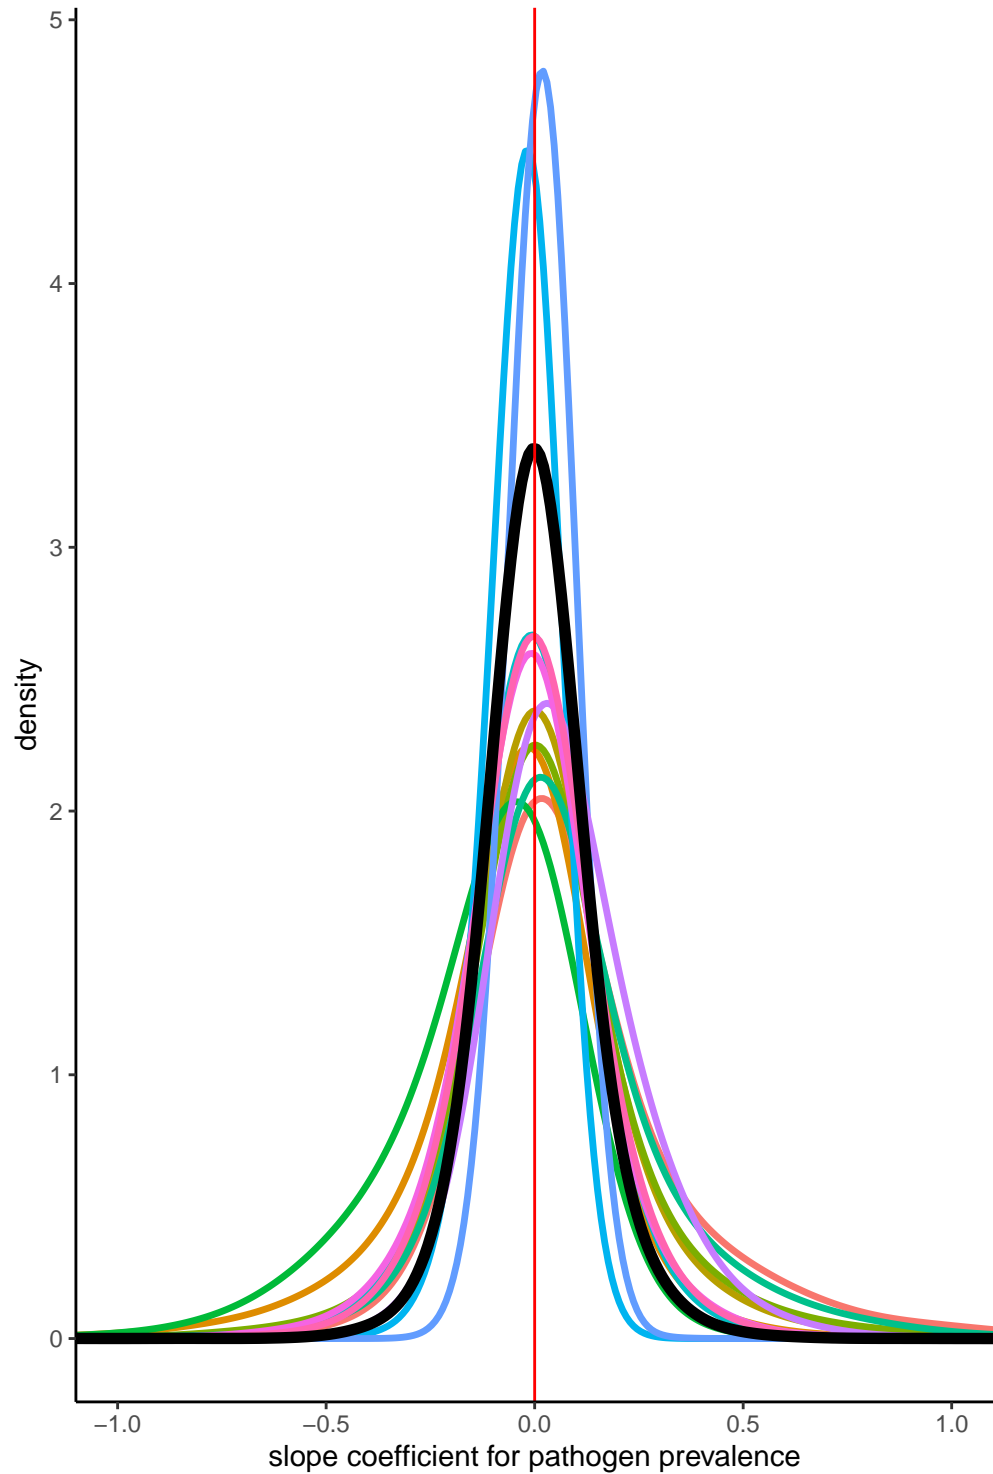

Pacific Salmon Nidovirus SpSu

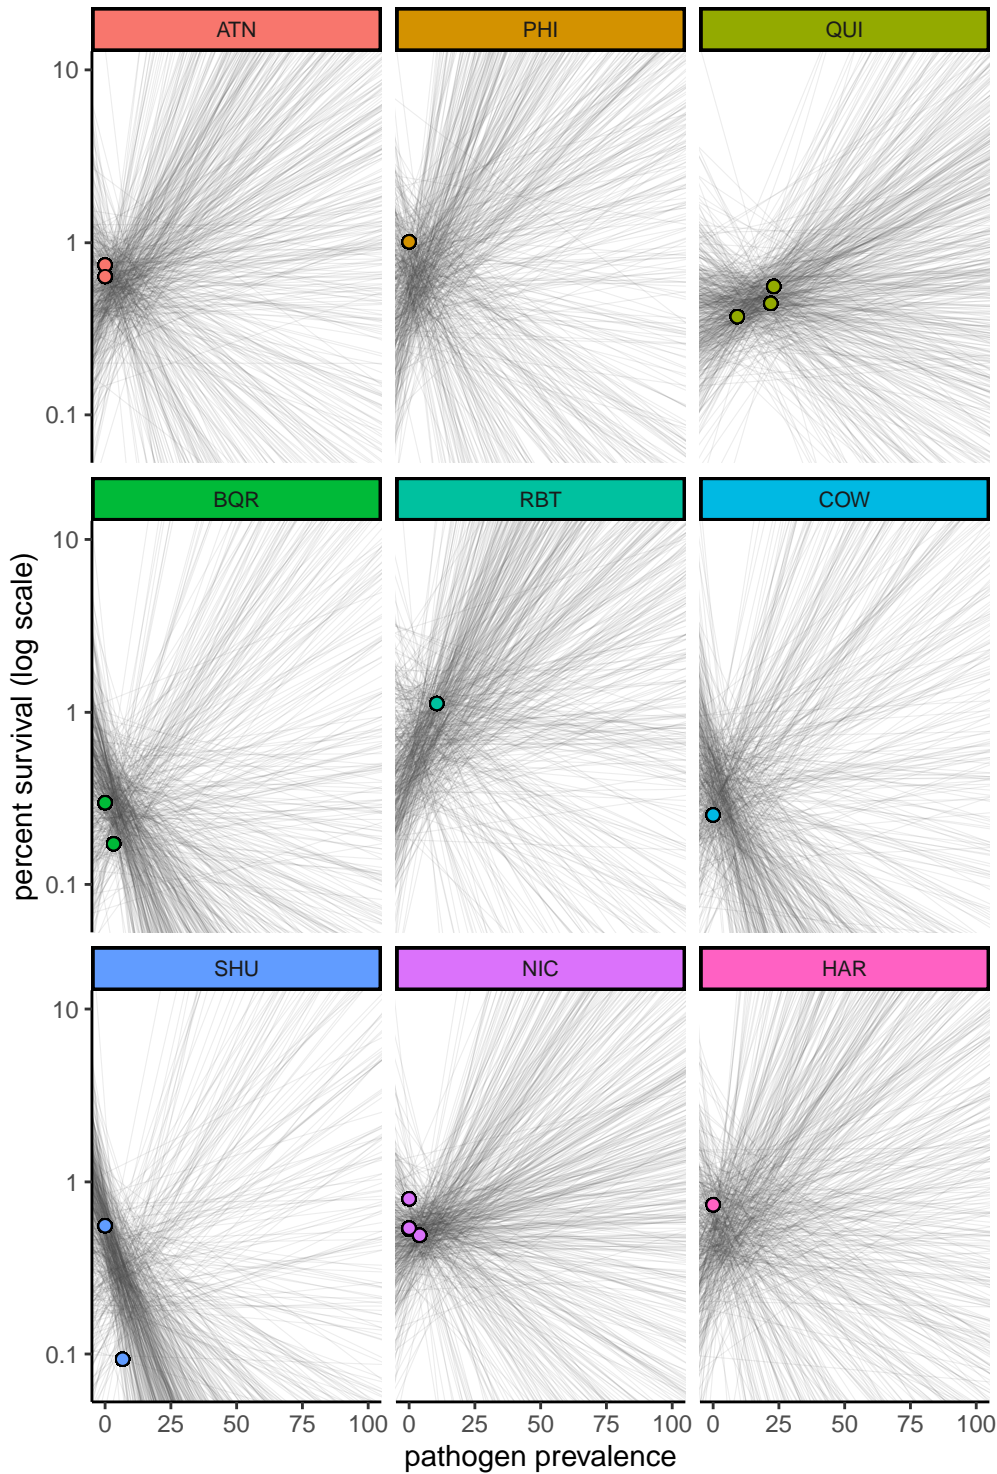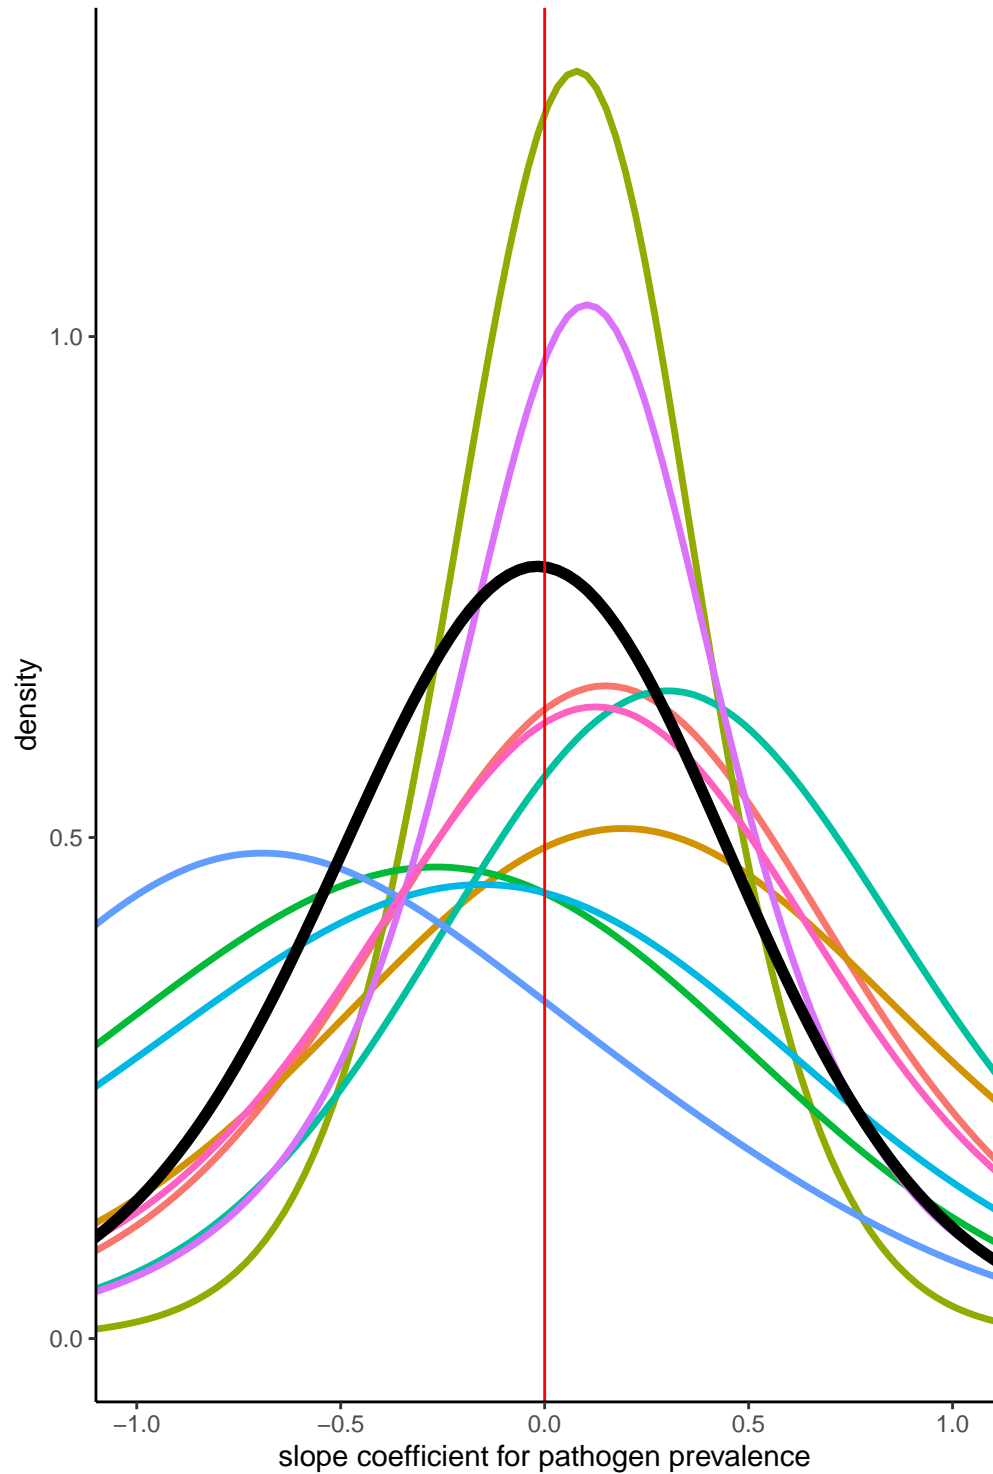



Facilispora margolisi SpSu

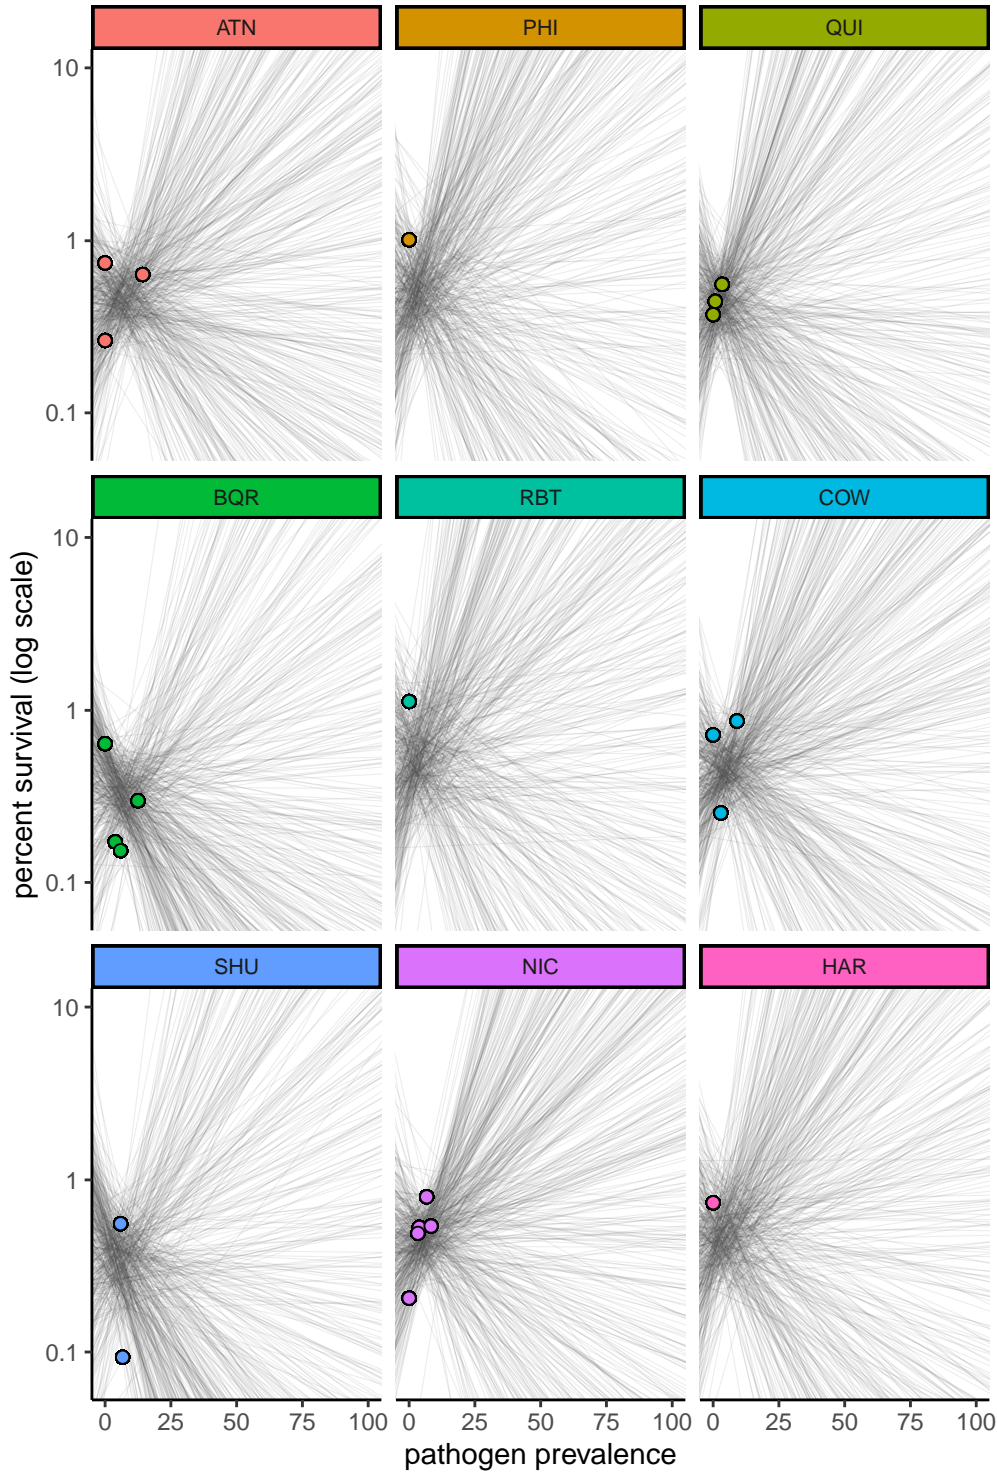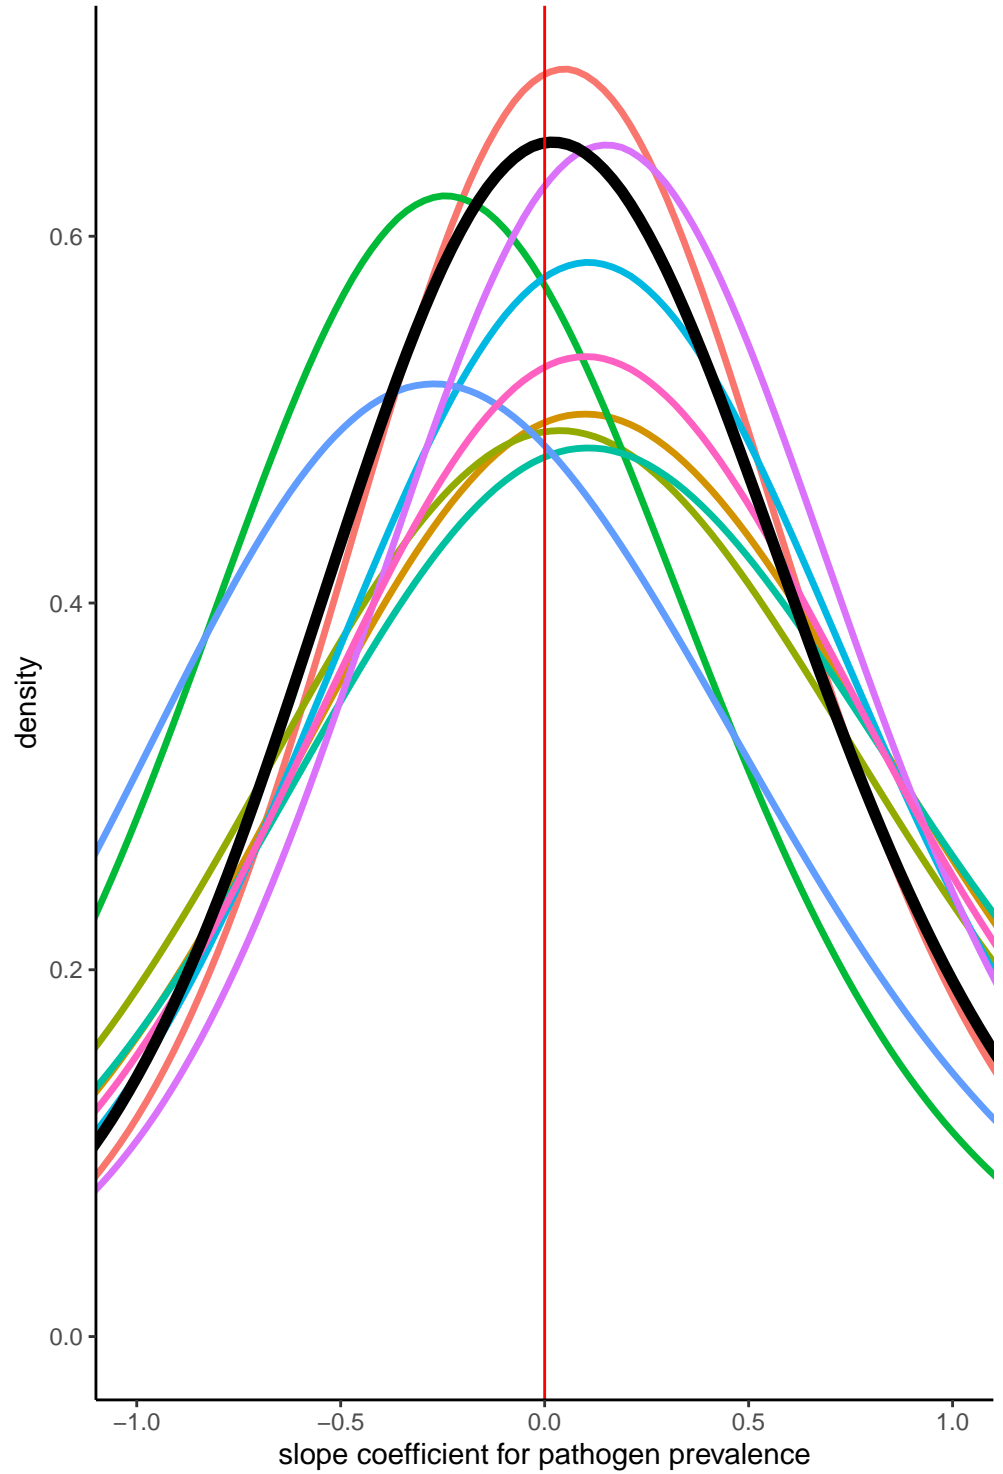

*Facilispora margolisi* FaWi

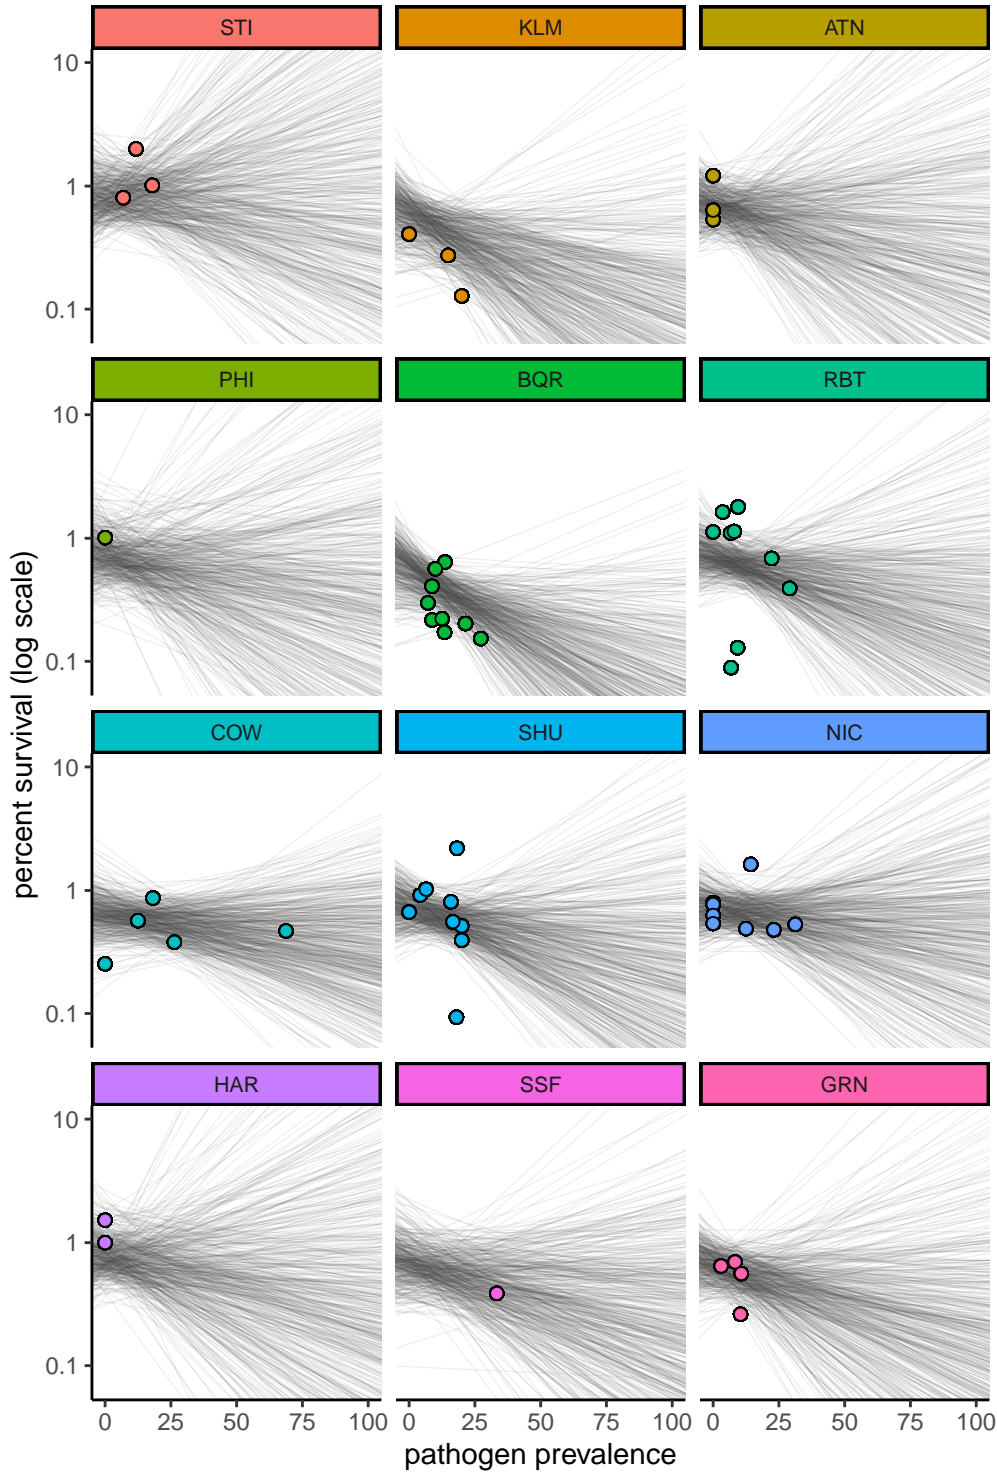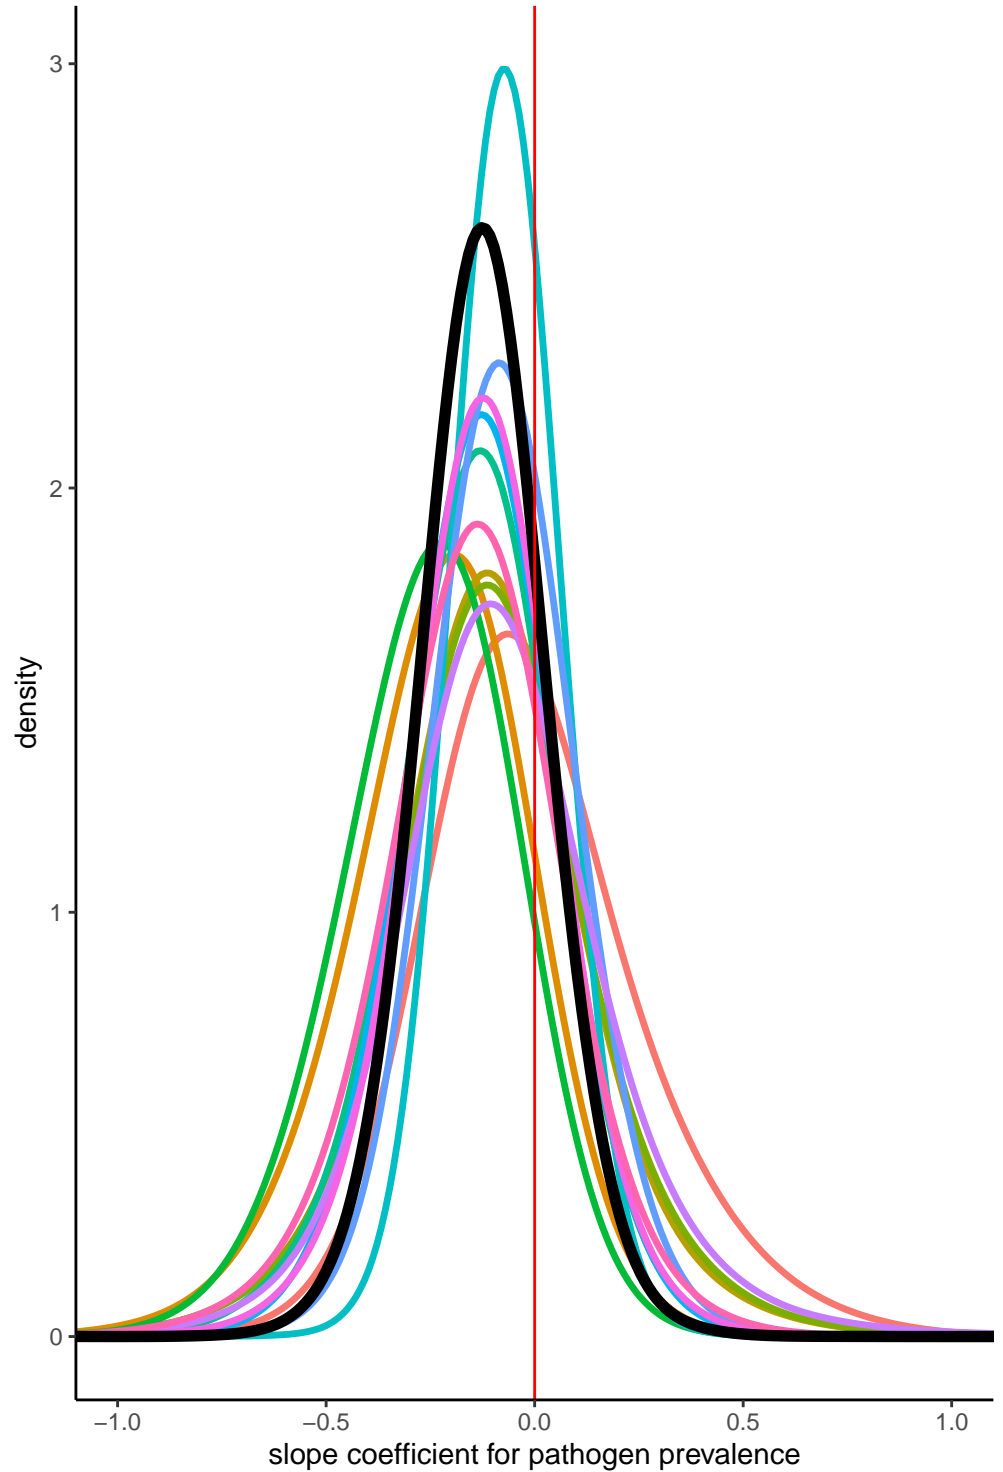

Flavobacterium psychrophilum SpSu

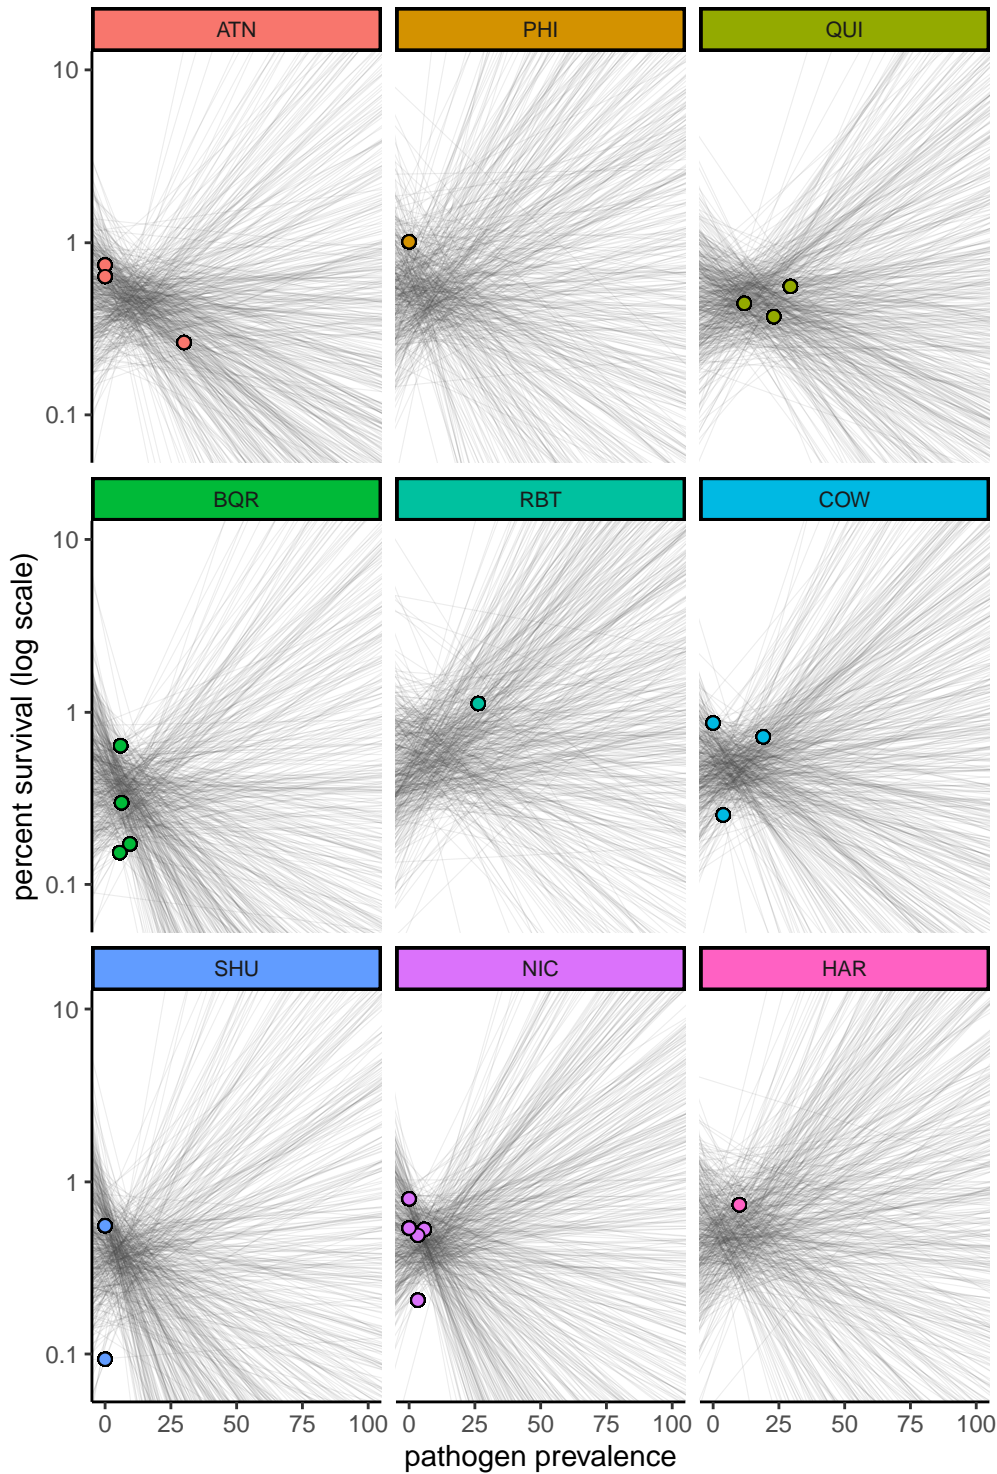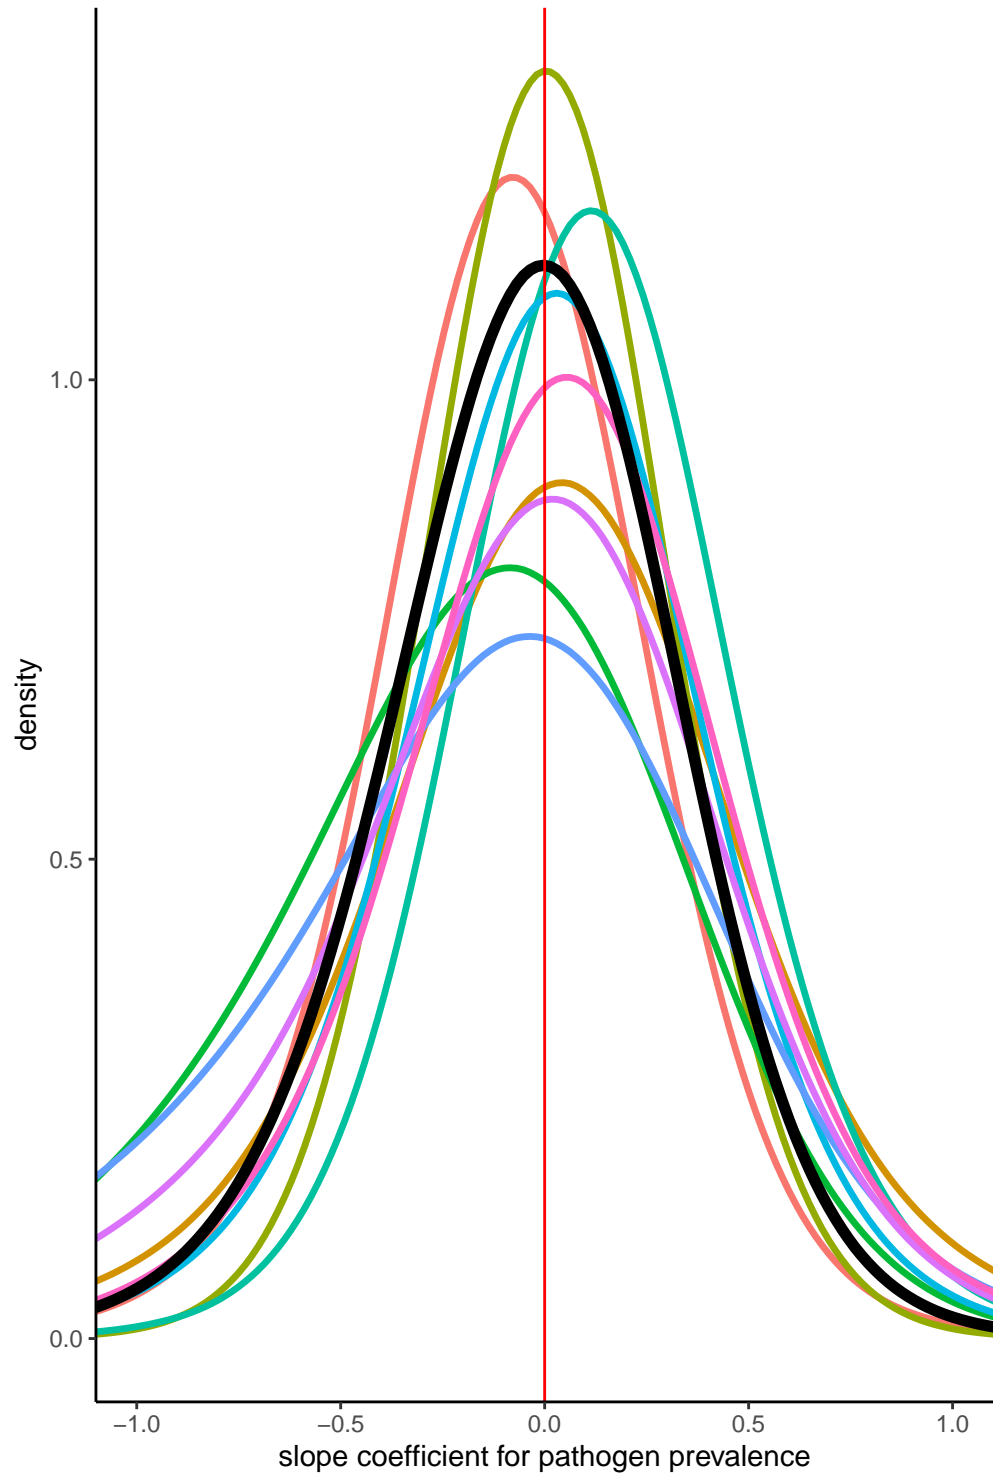

Flavobacterium psychrophilum FaWi

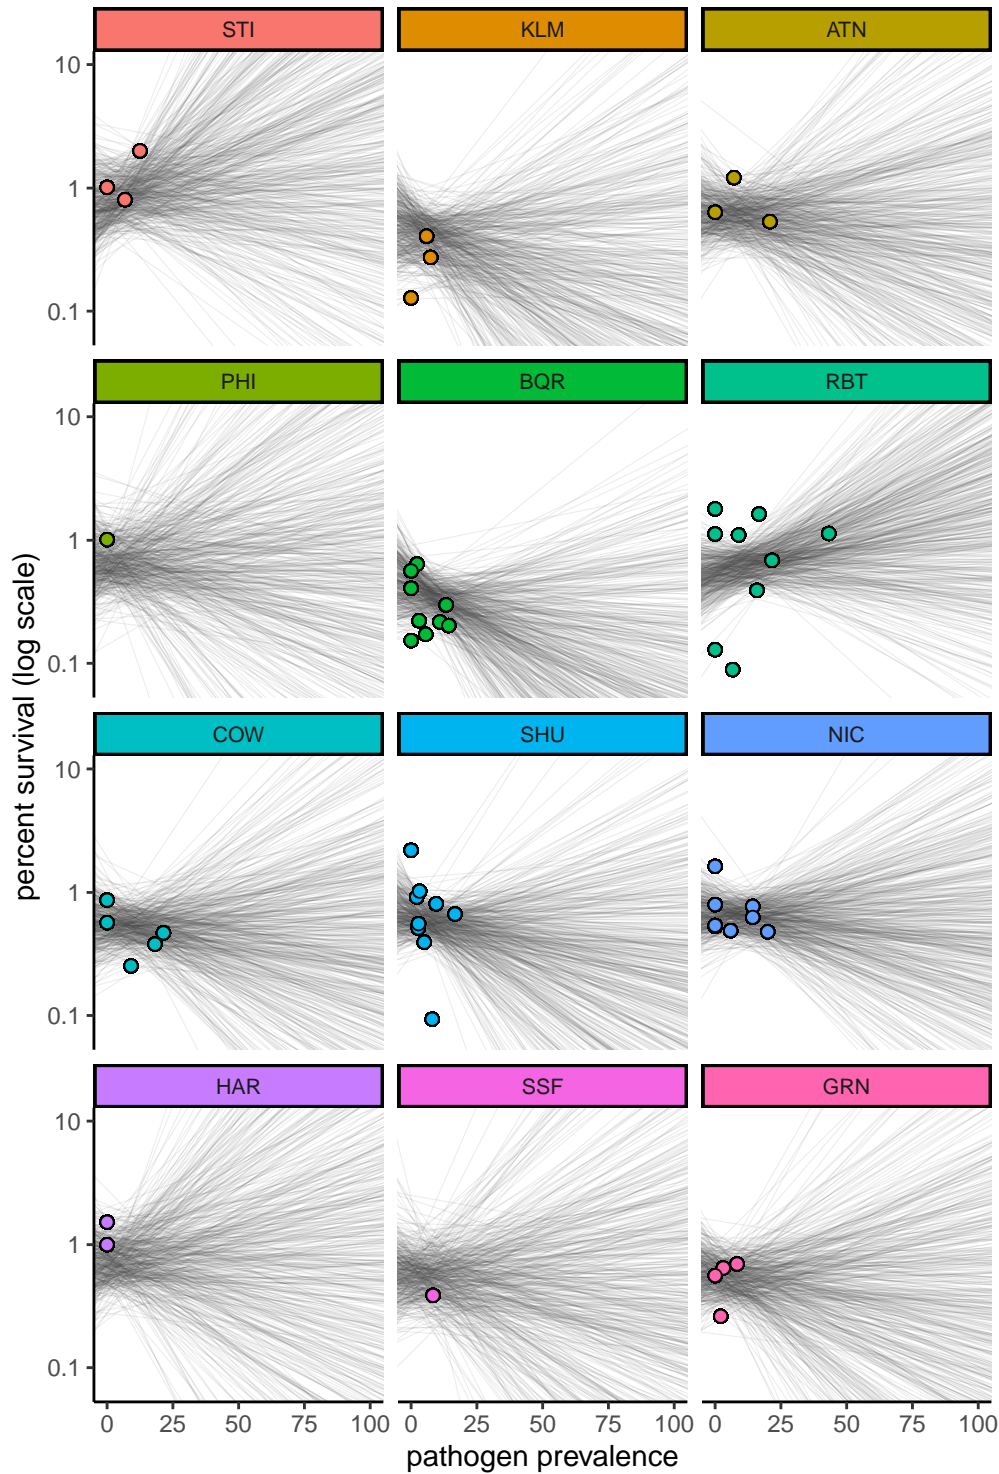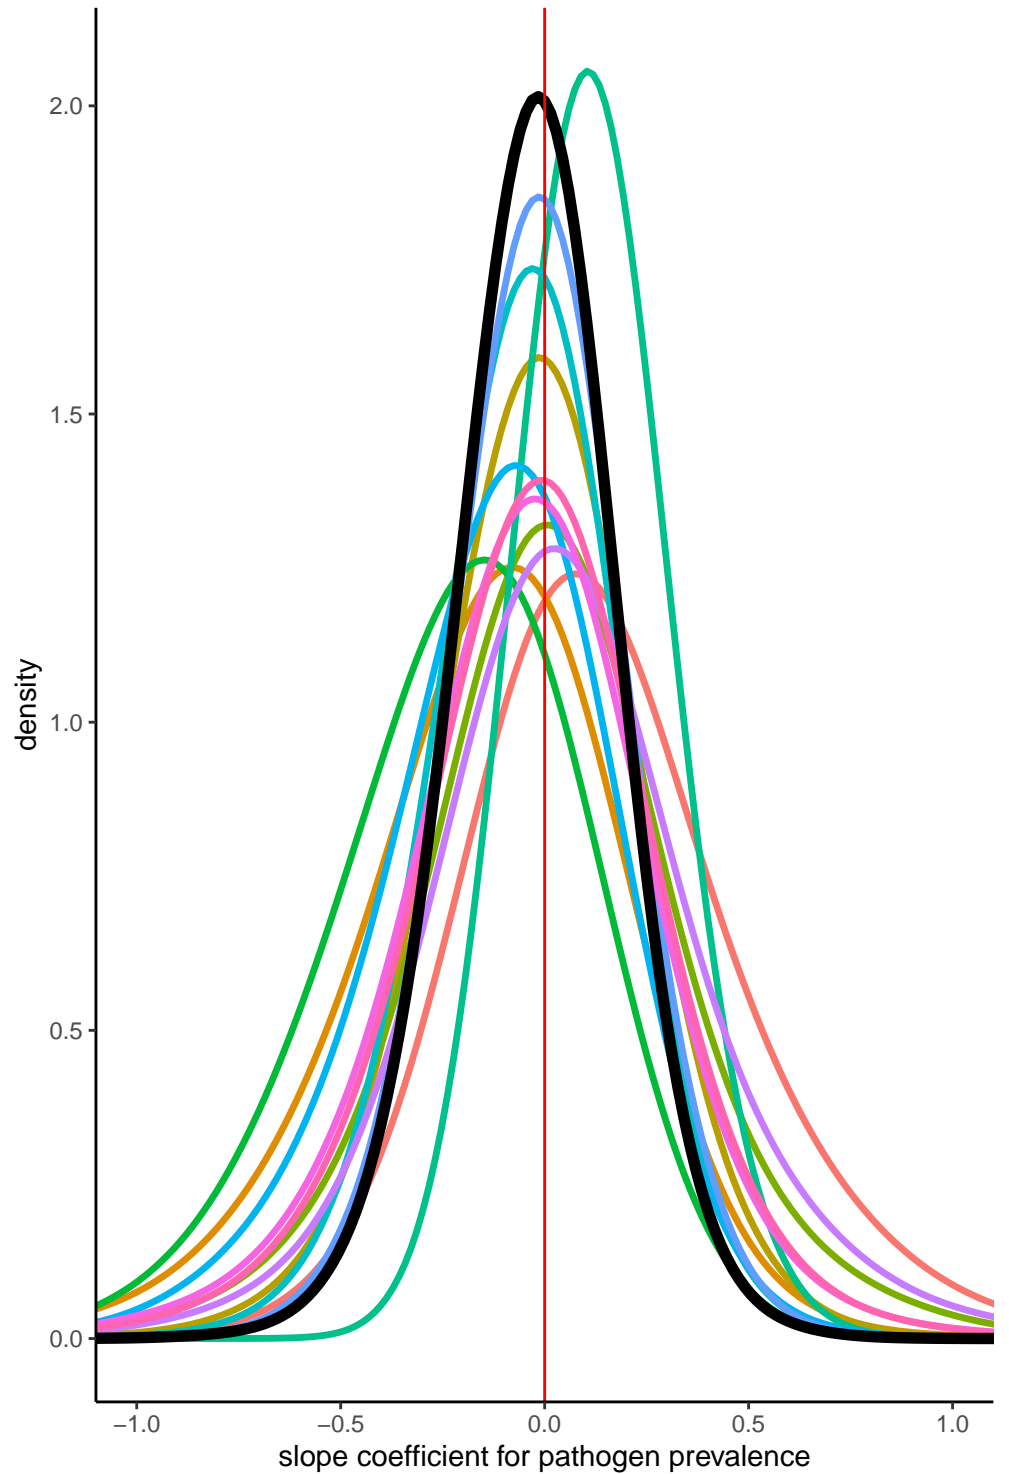

Ichthyophonus hoferi SpSu

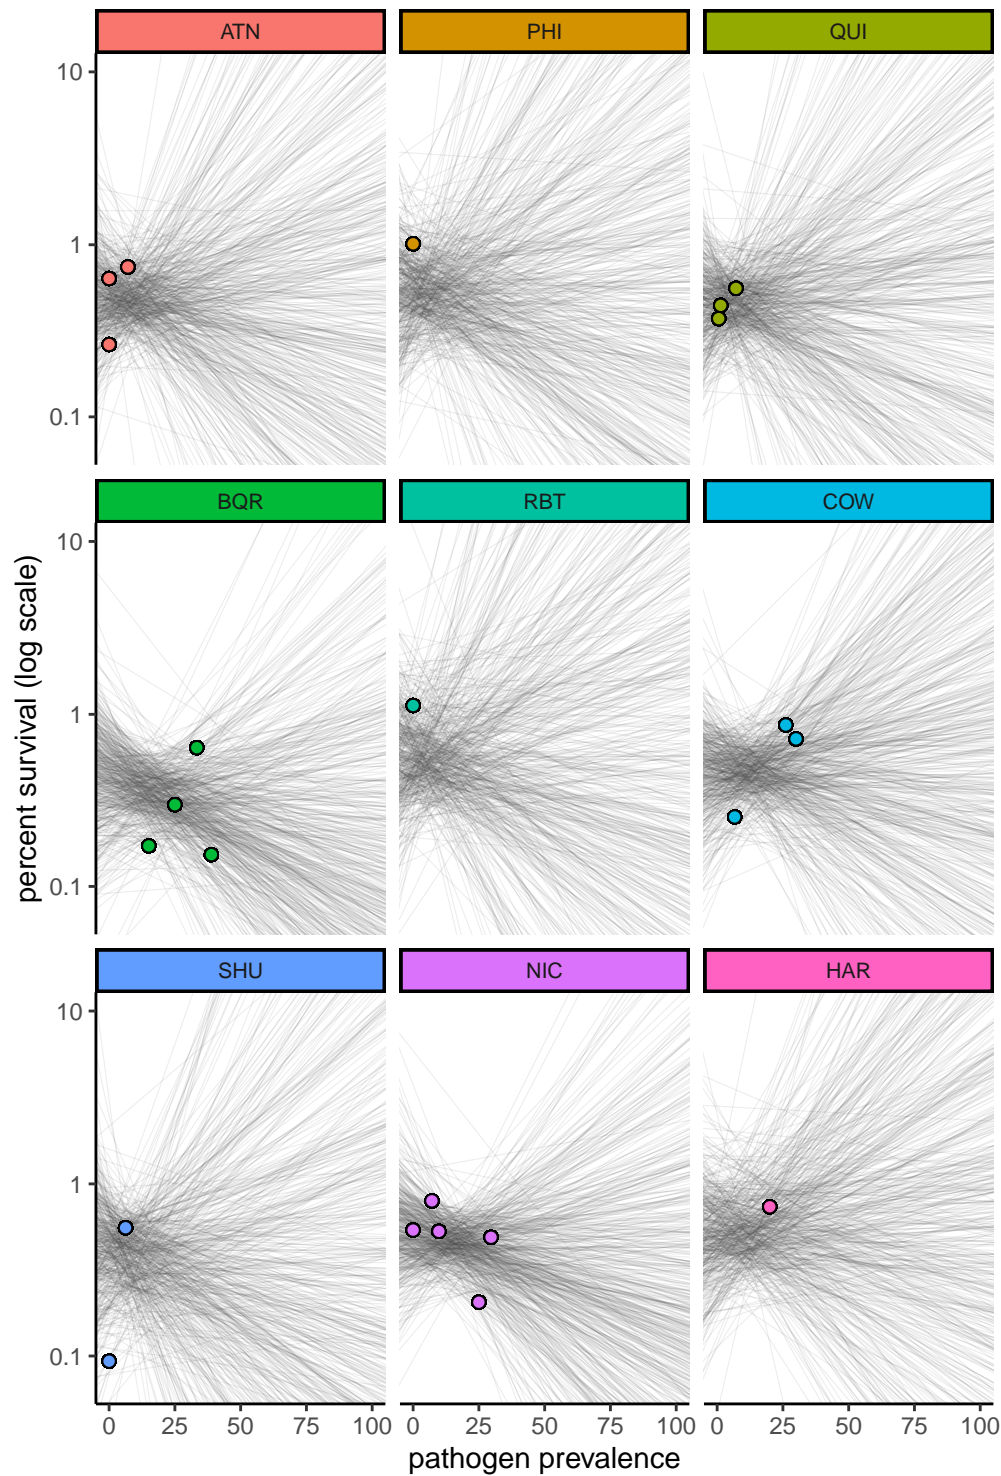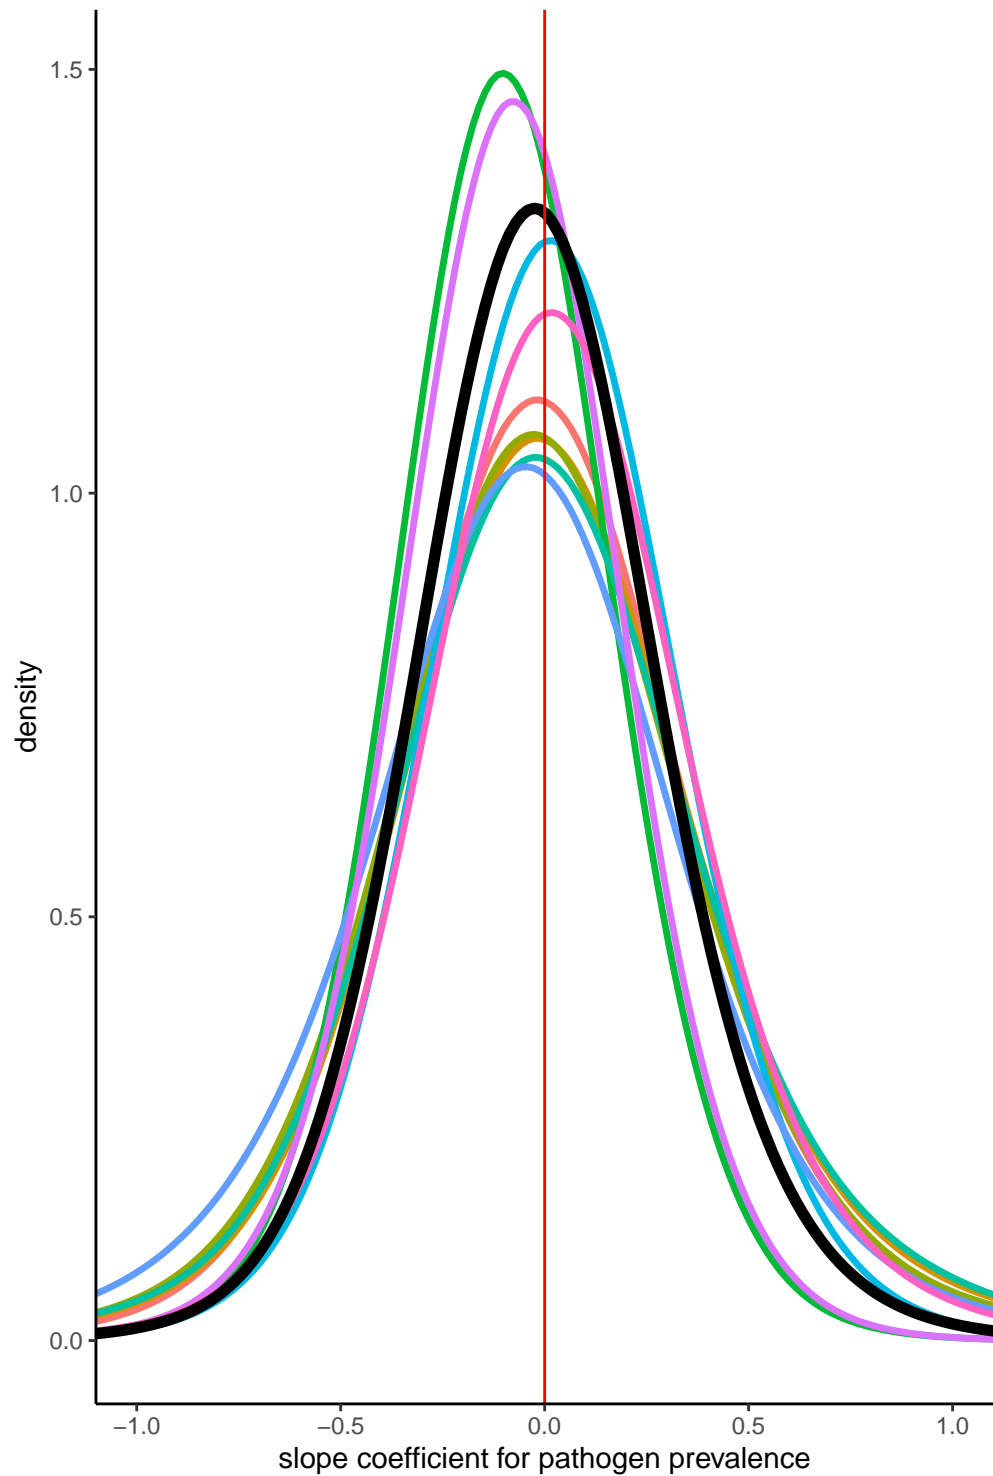

Ichthyophonus hoferi FaWi

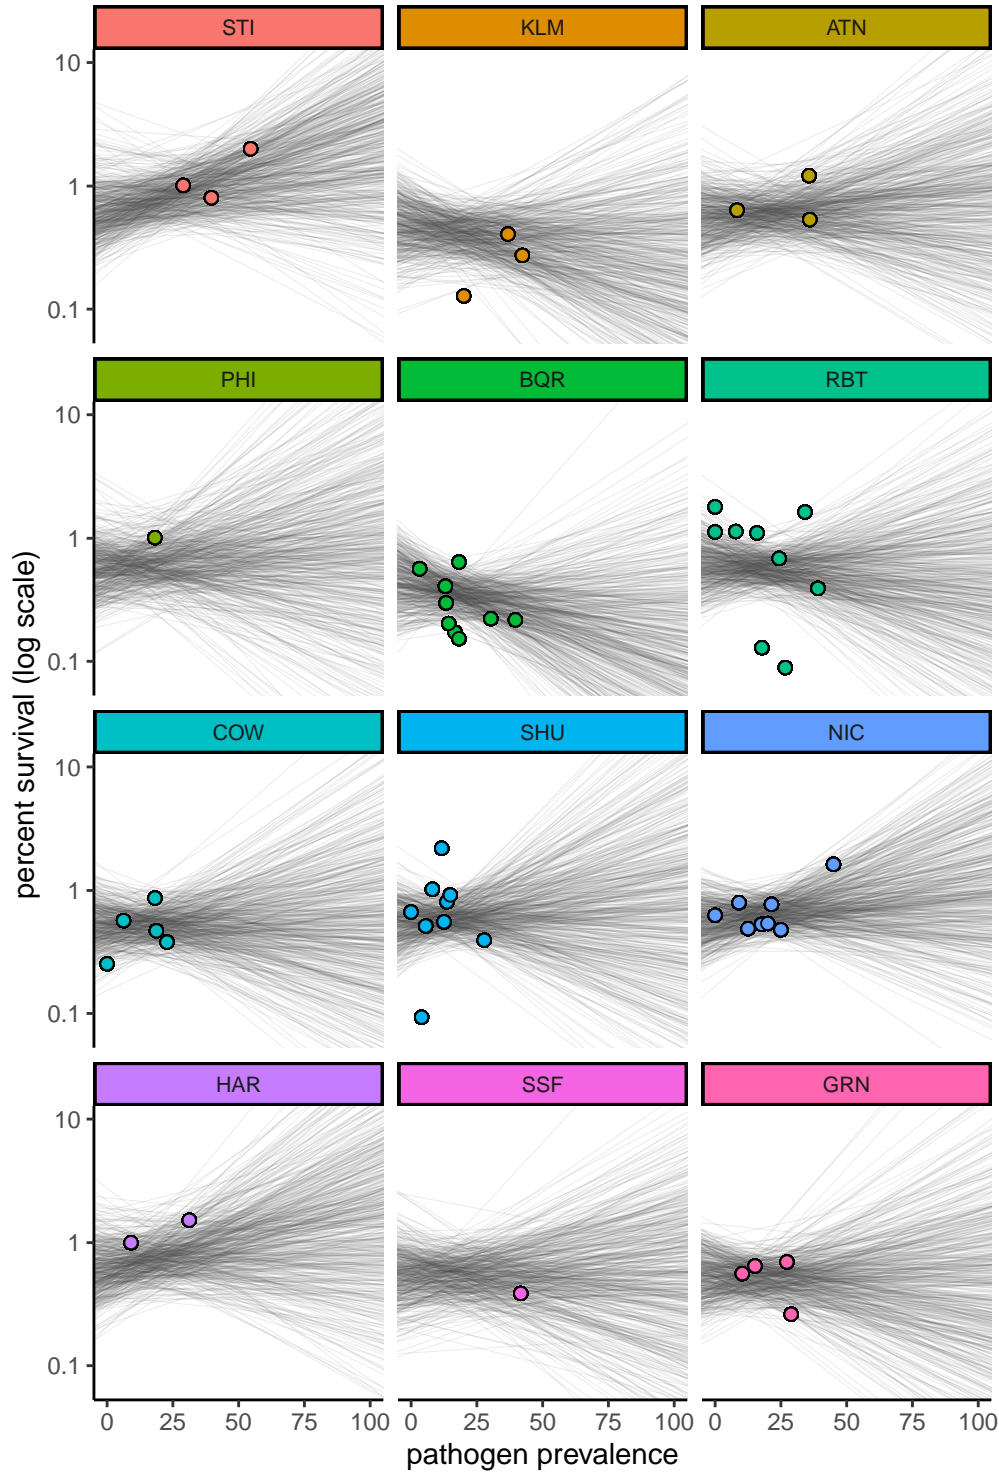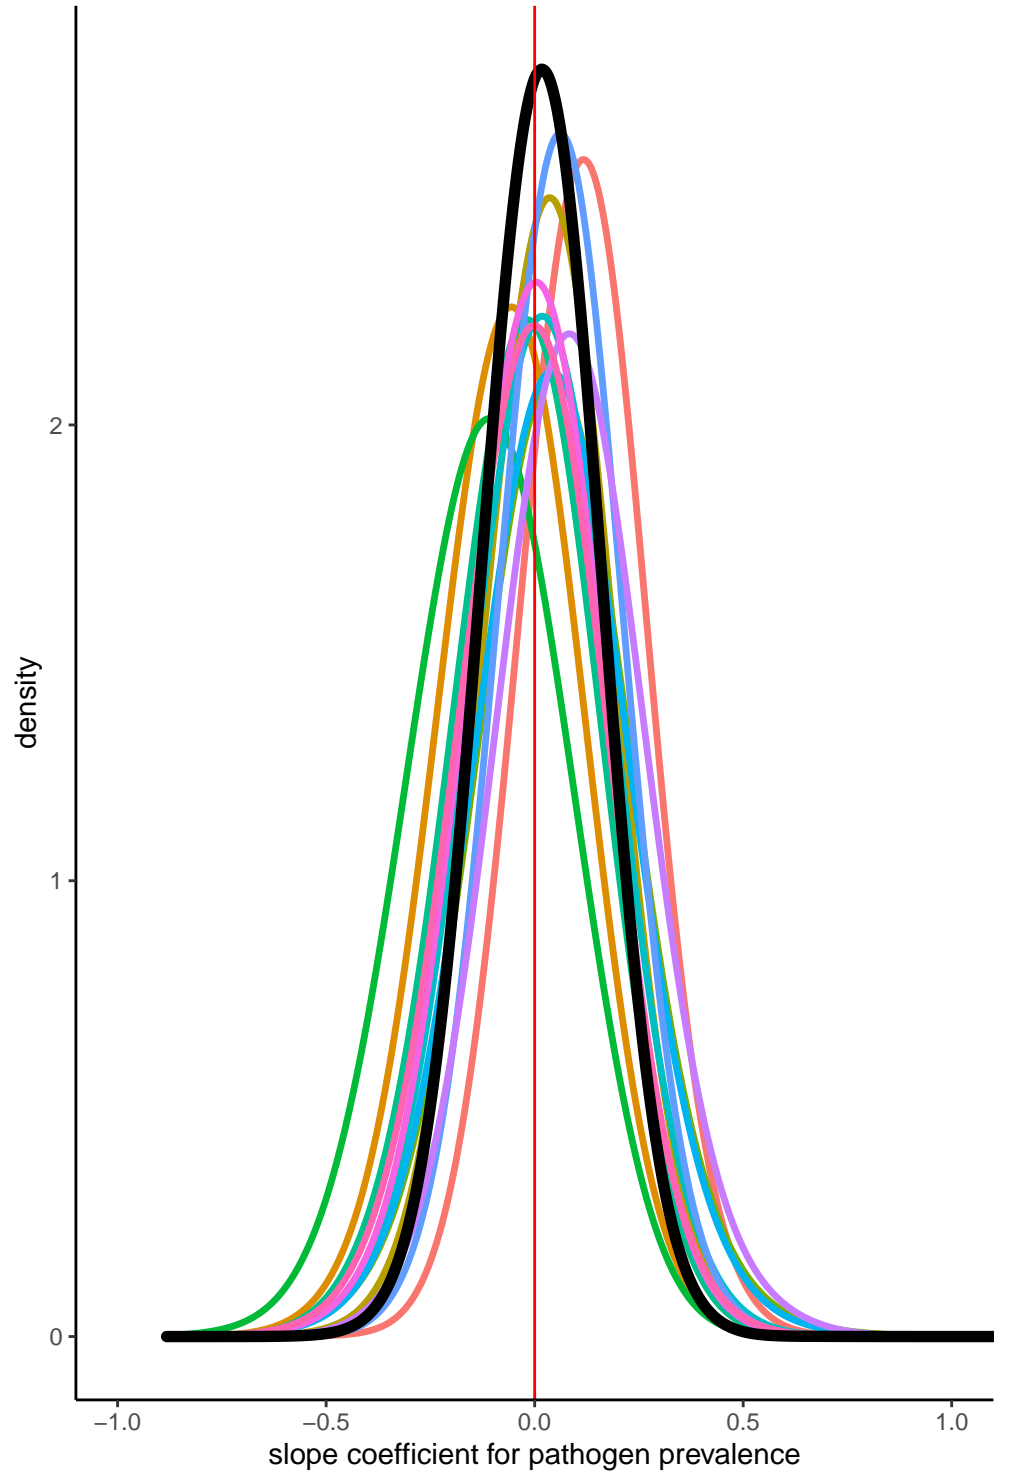

Ichthyophthirius multifiliis SpSu

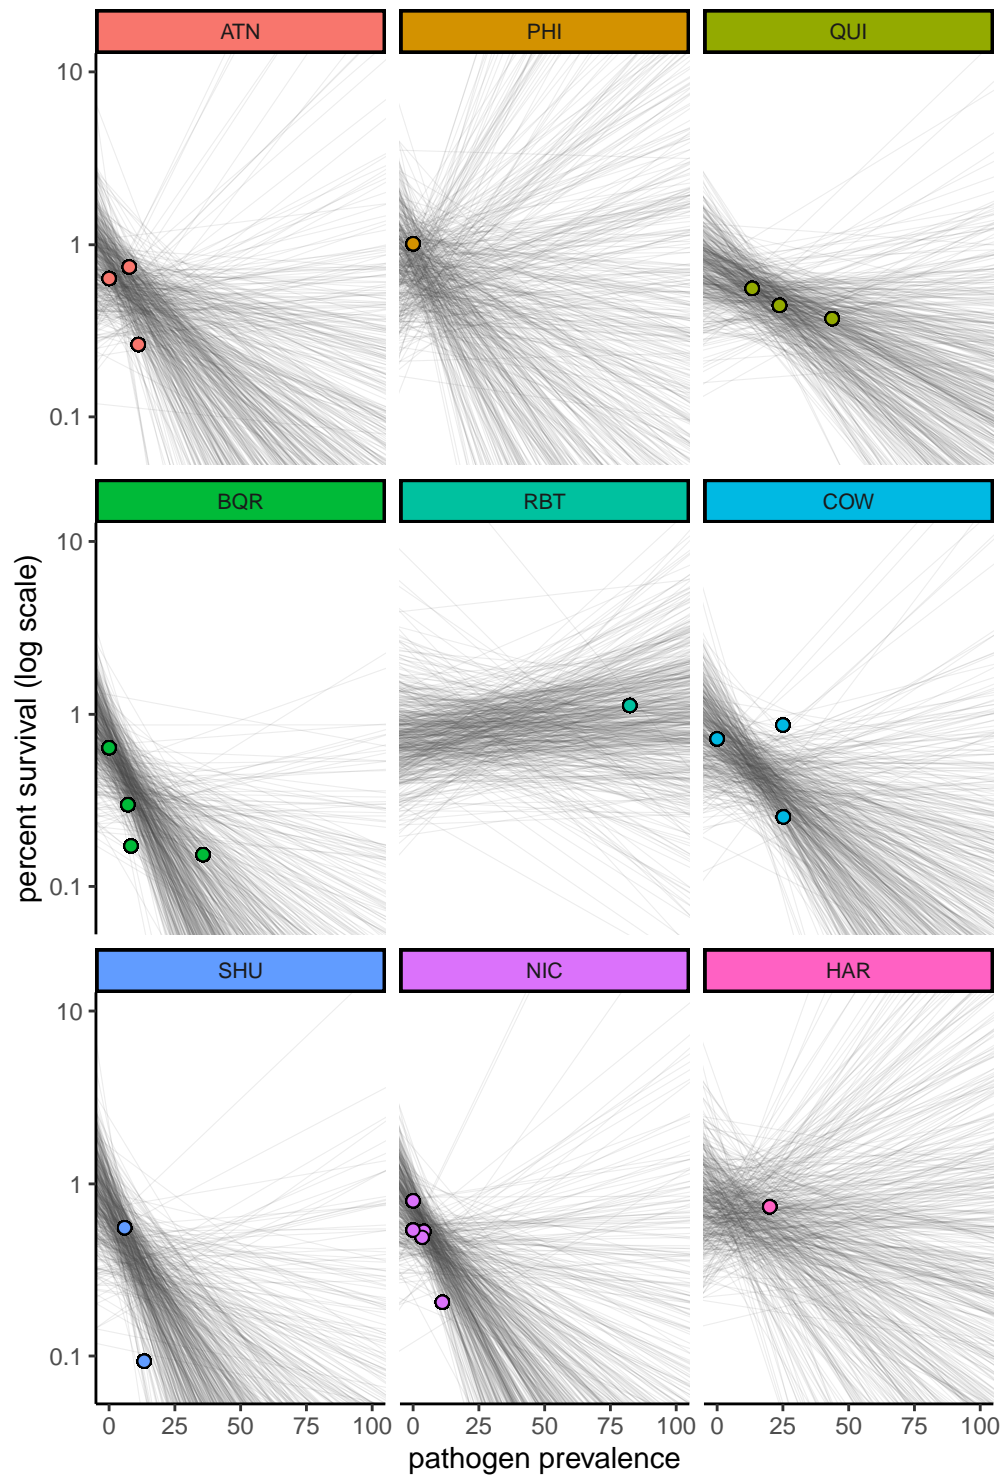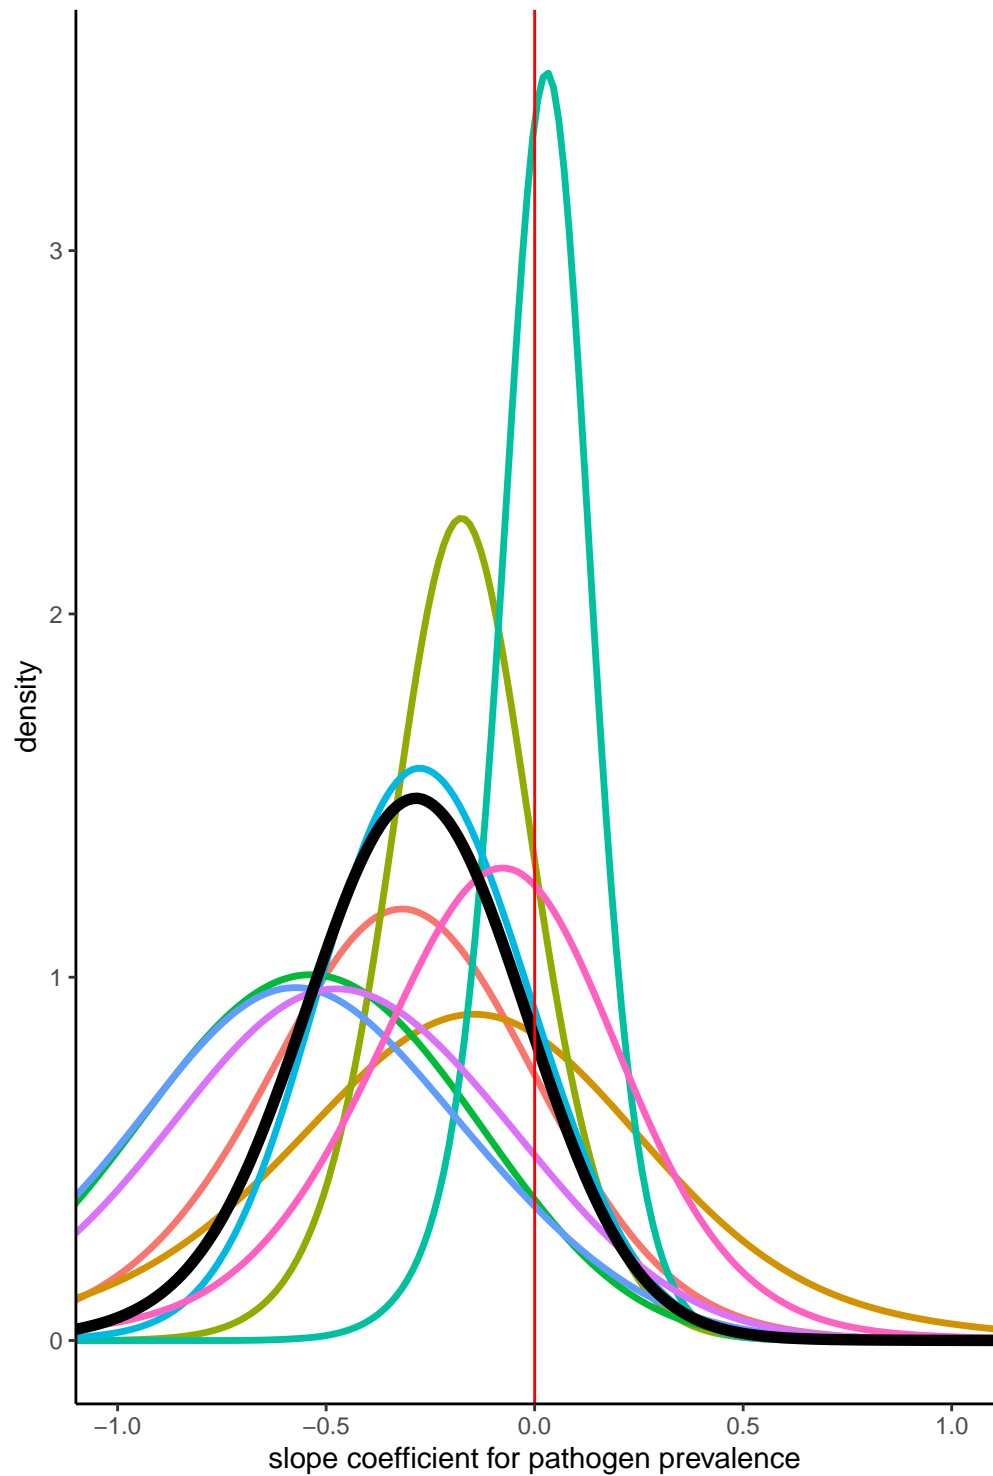

Ichthyophthirius multifiliis FaWi

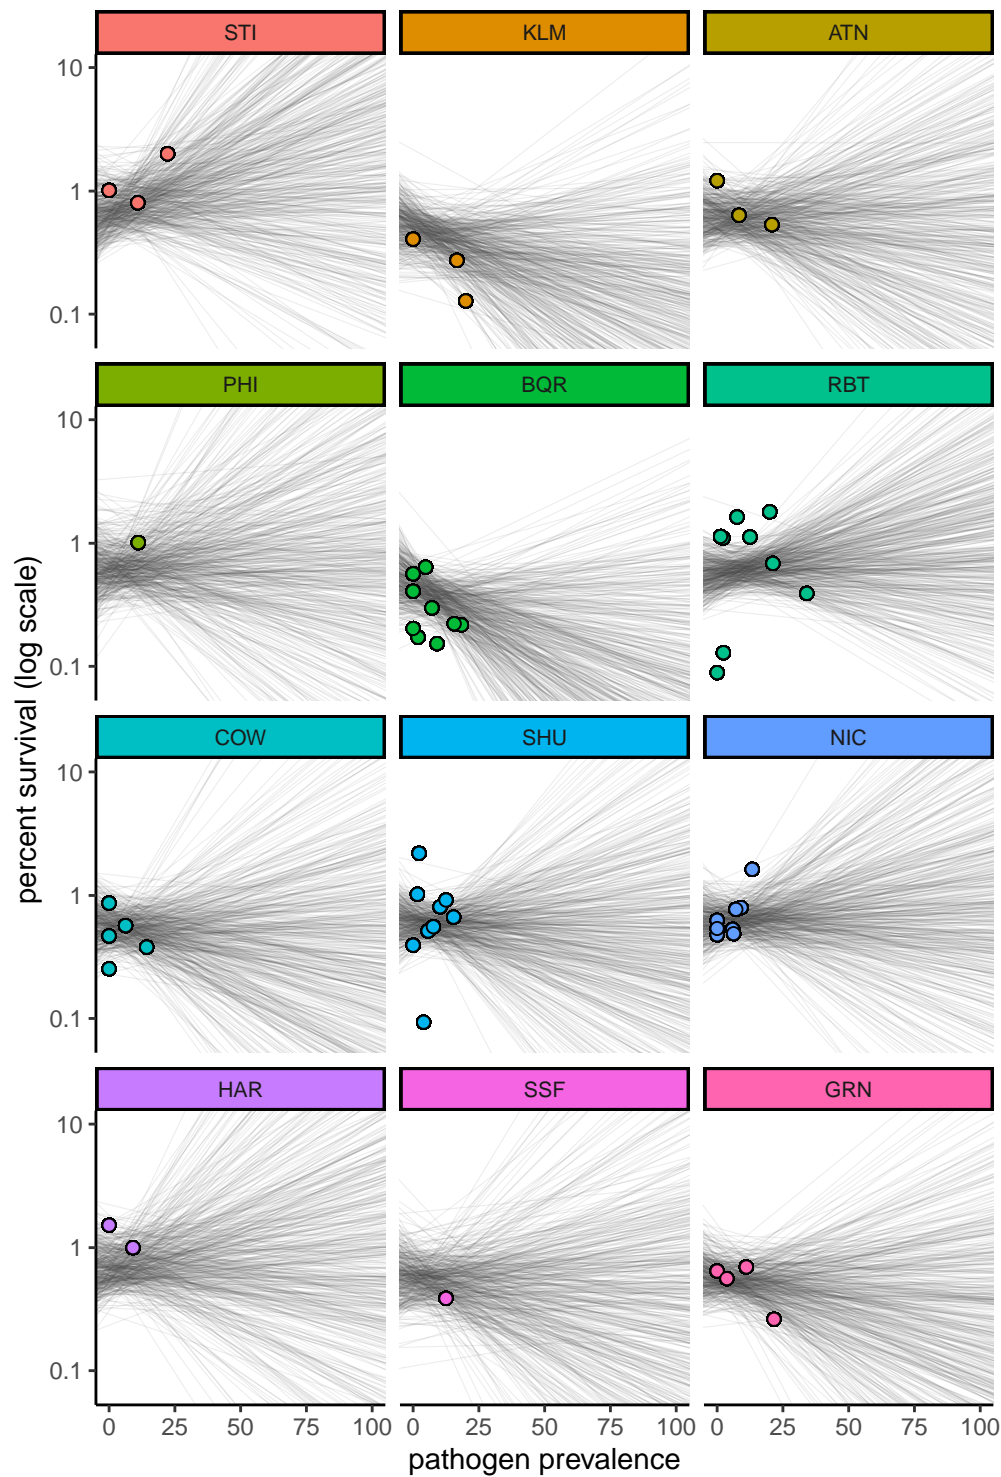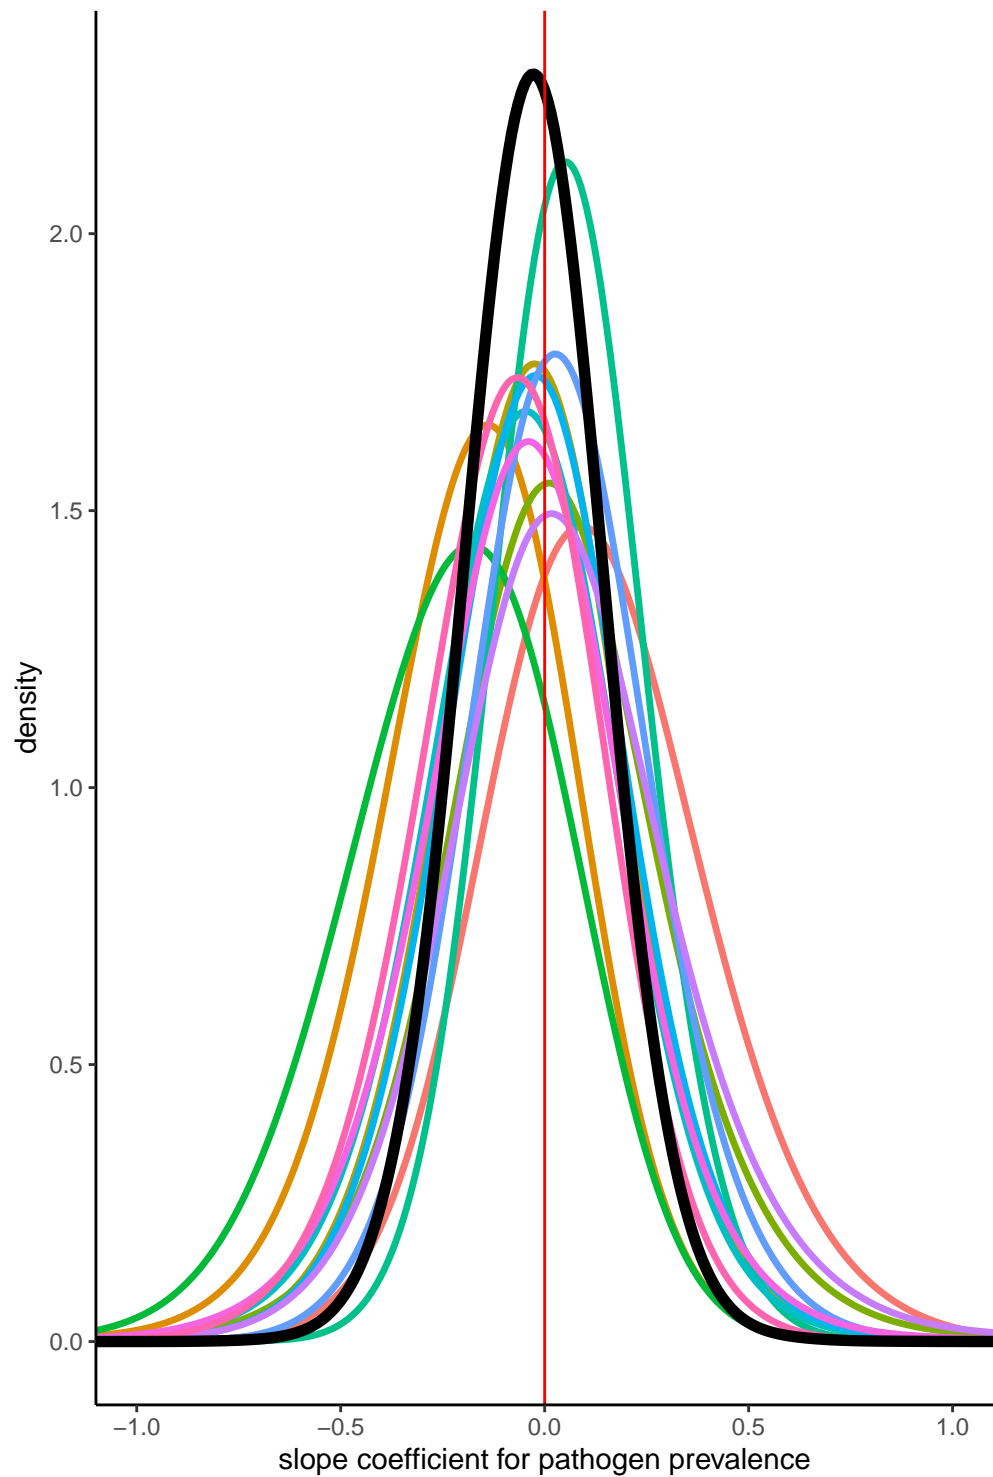



Kudoa thyrsites SpSu

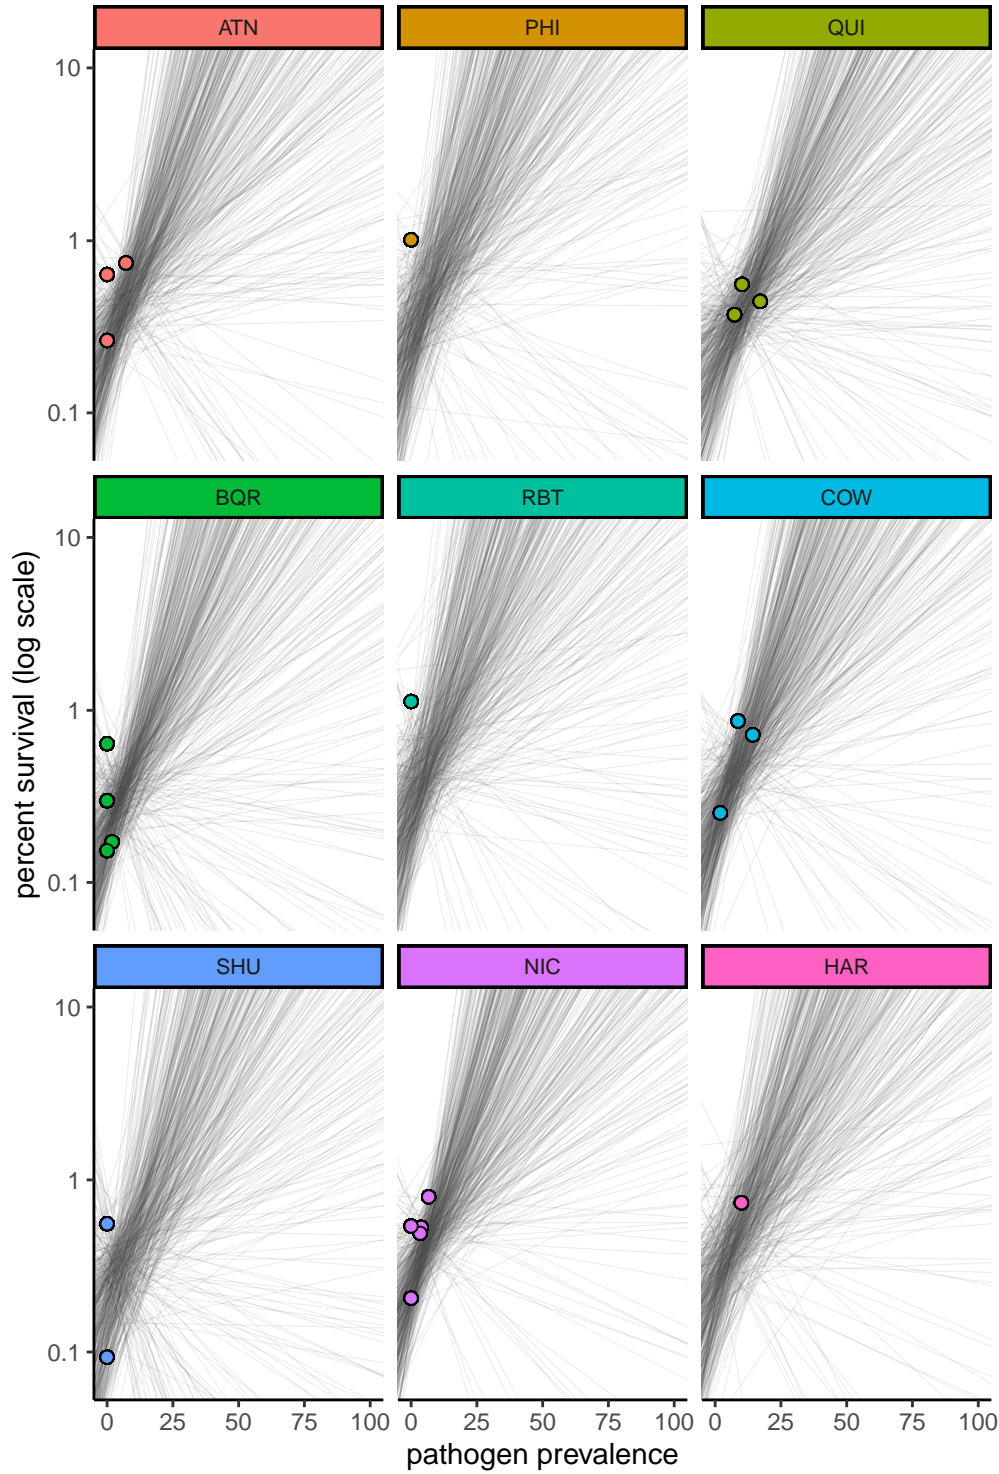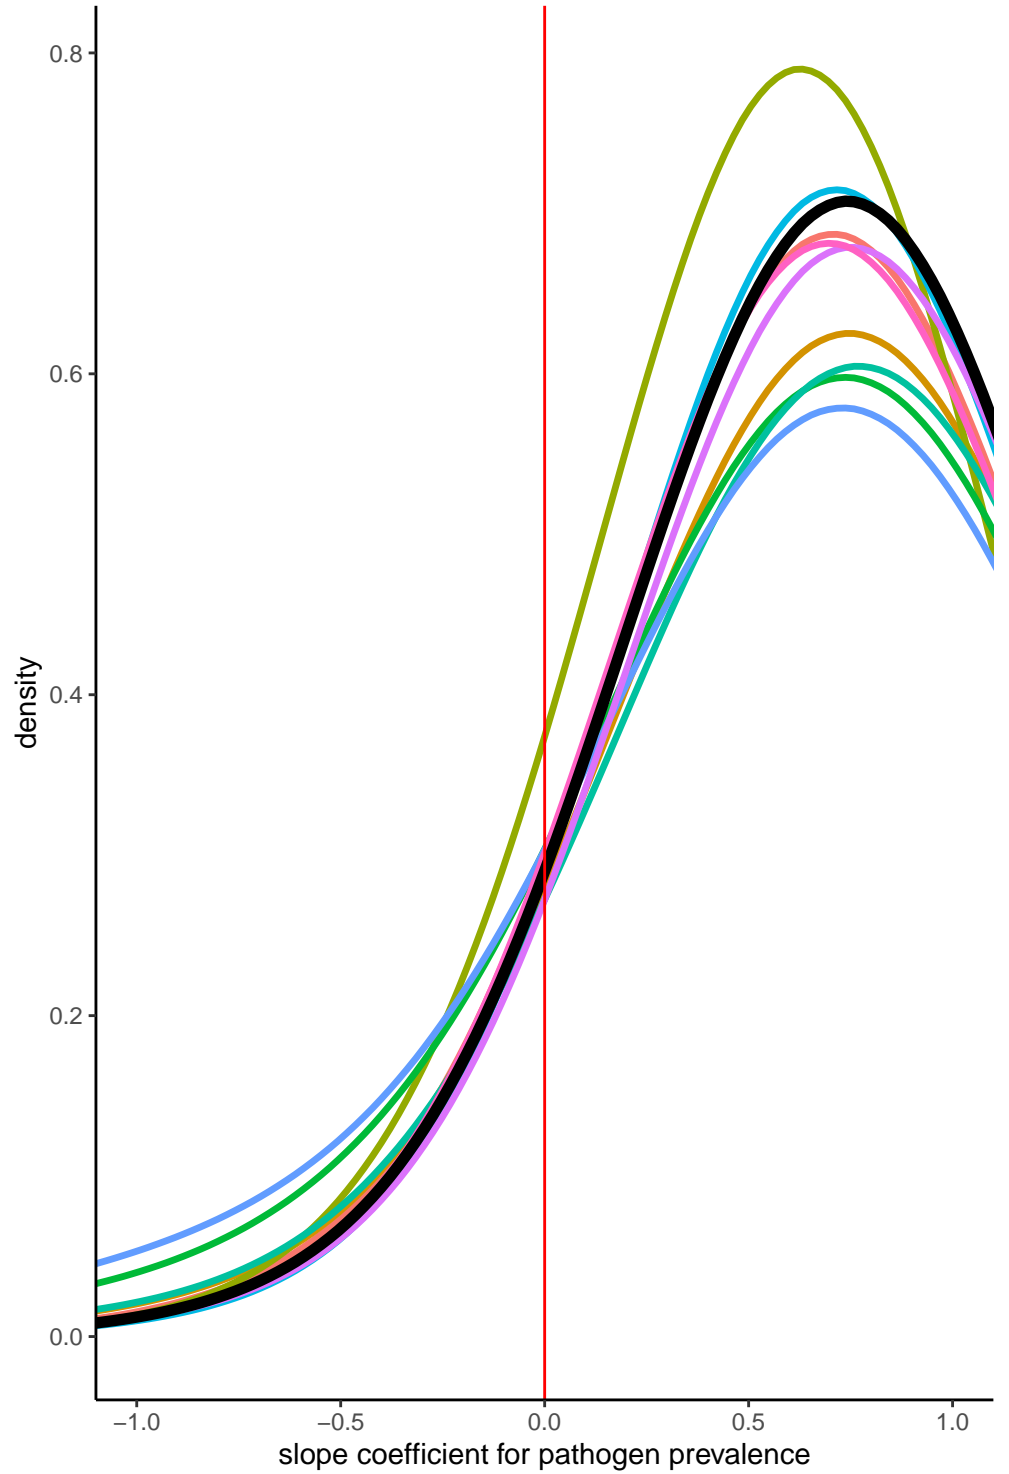

Kudoa thyrssites FaWi

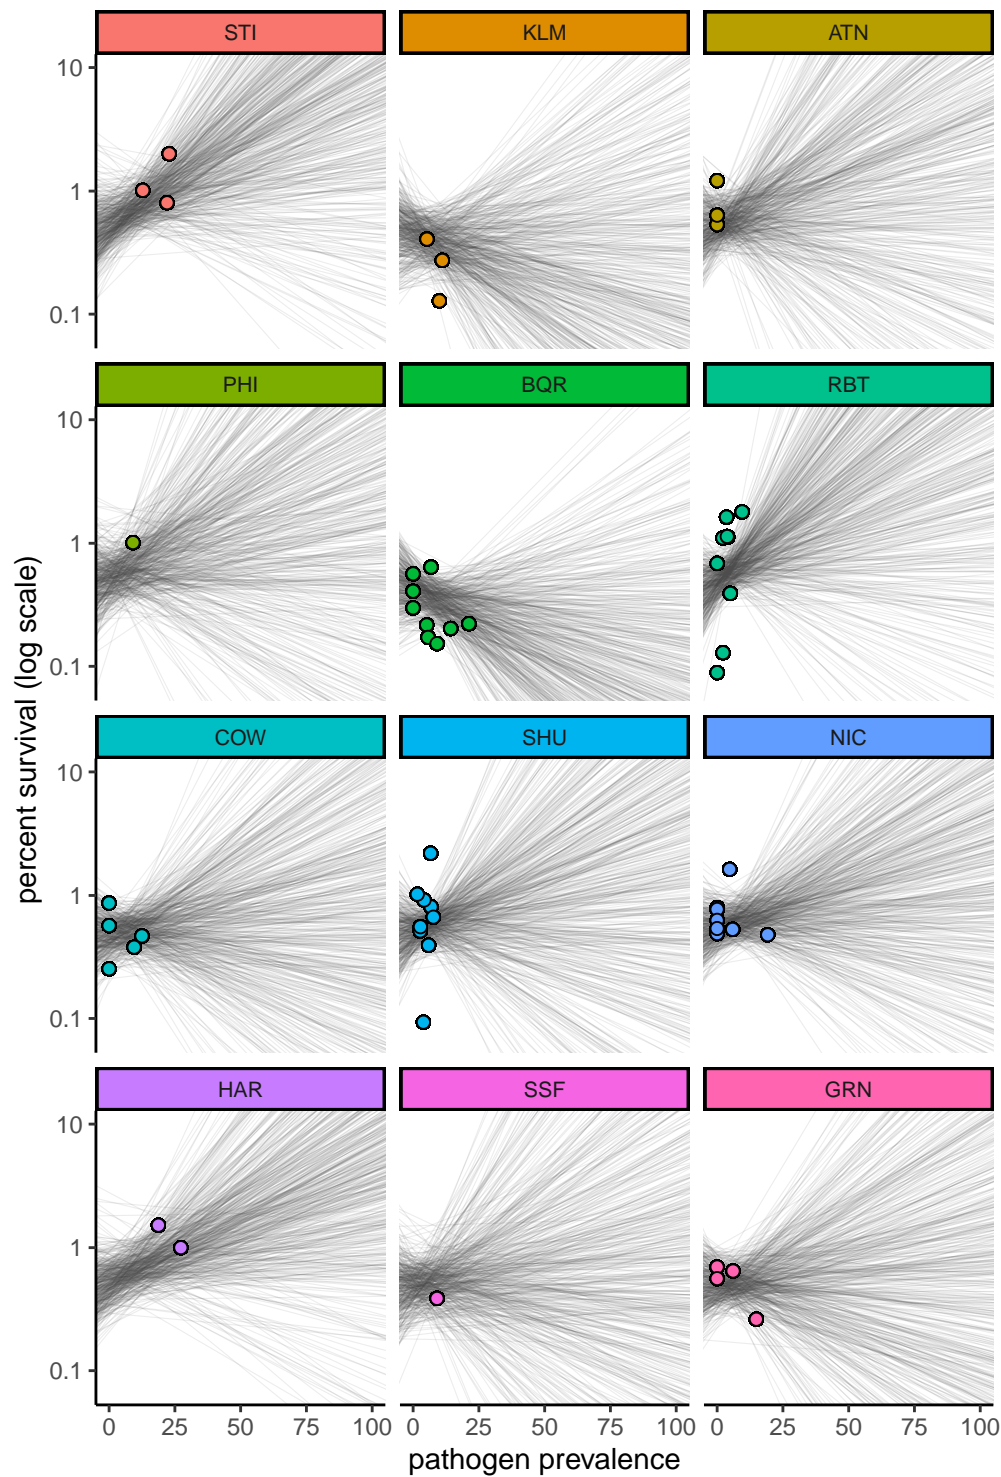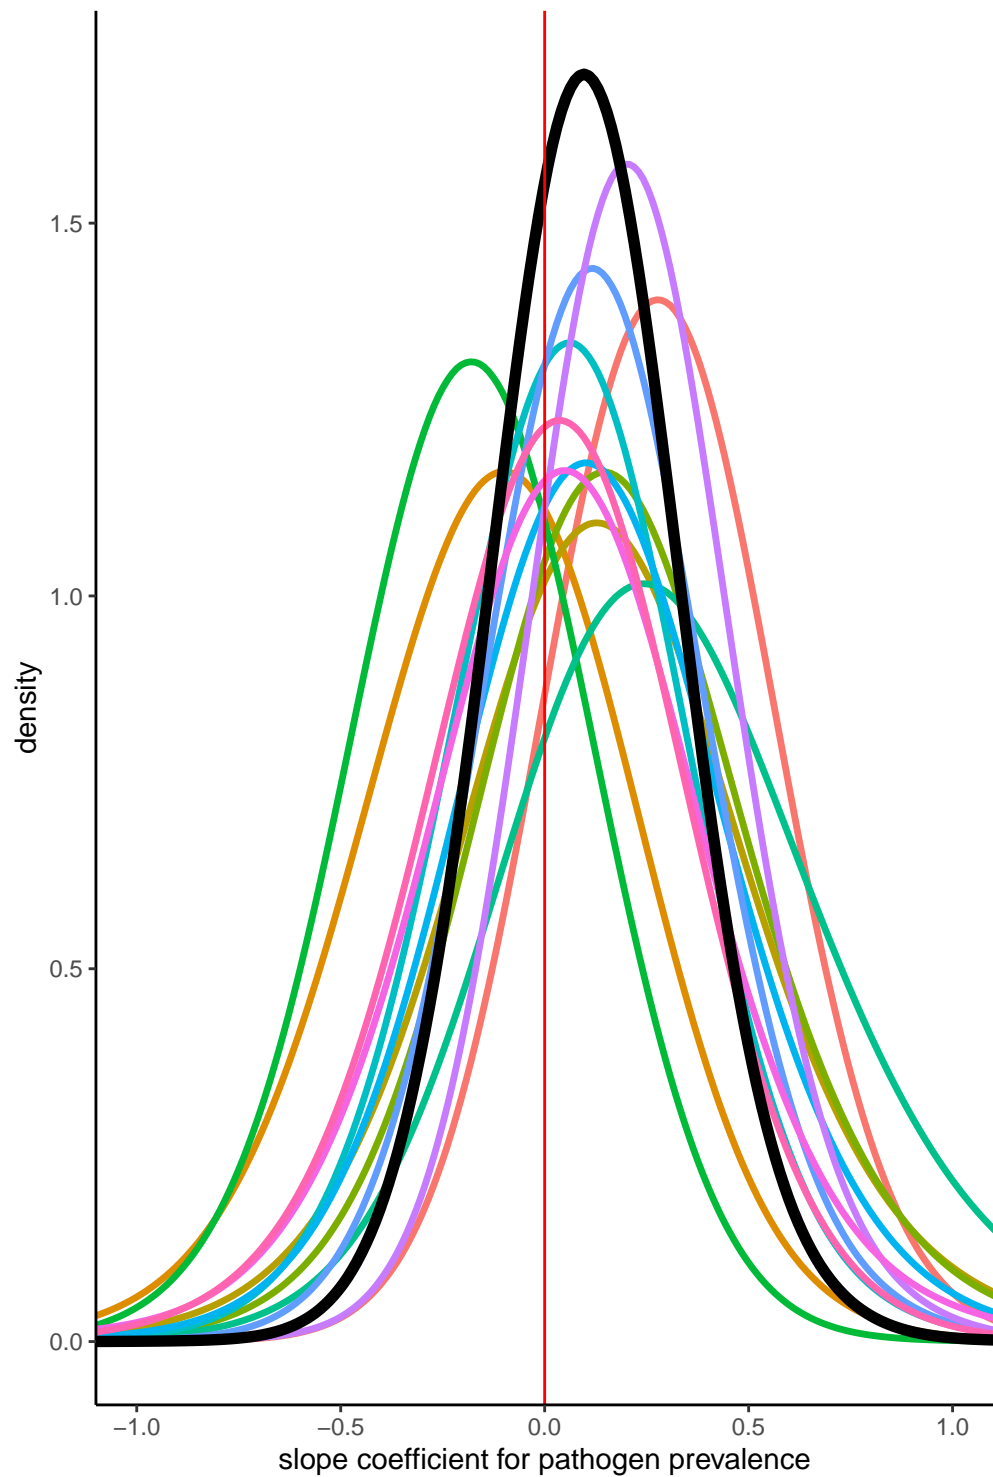

Loma salmonae SpSu

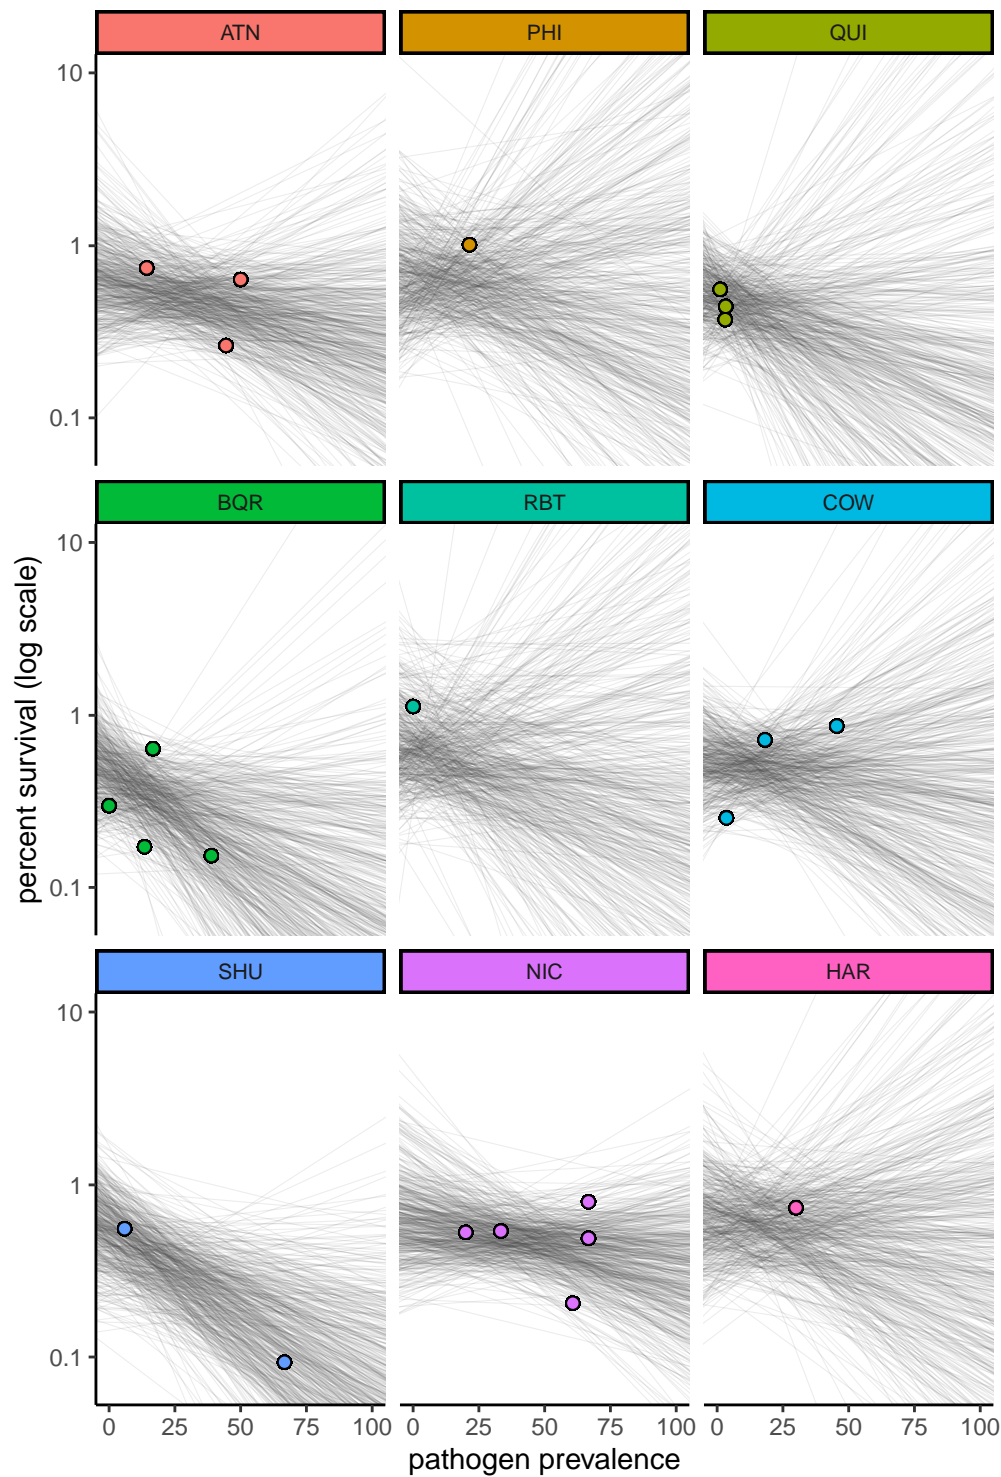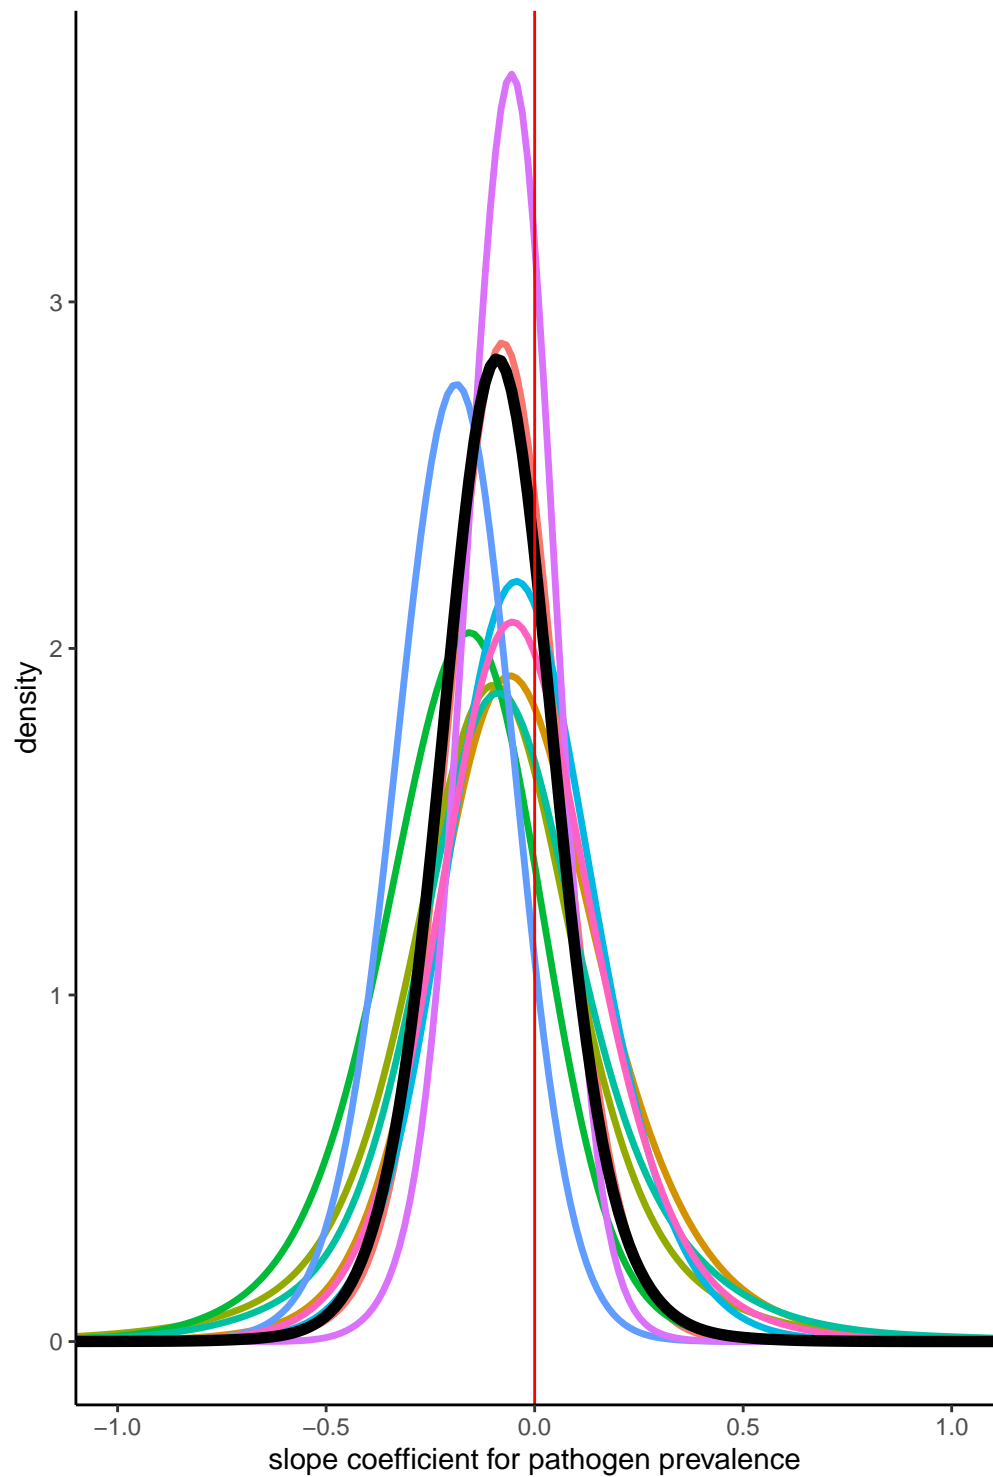

Loma salmonae FaWi

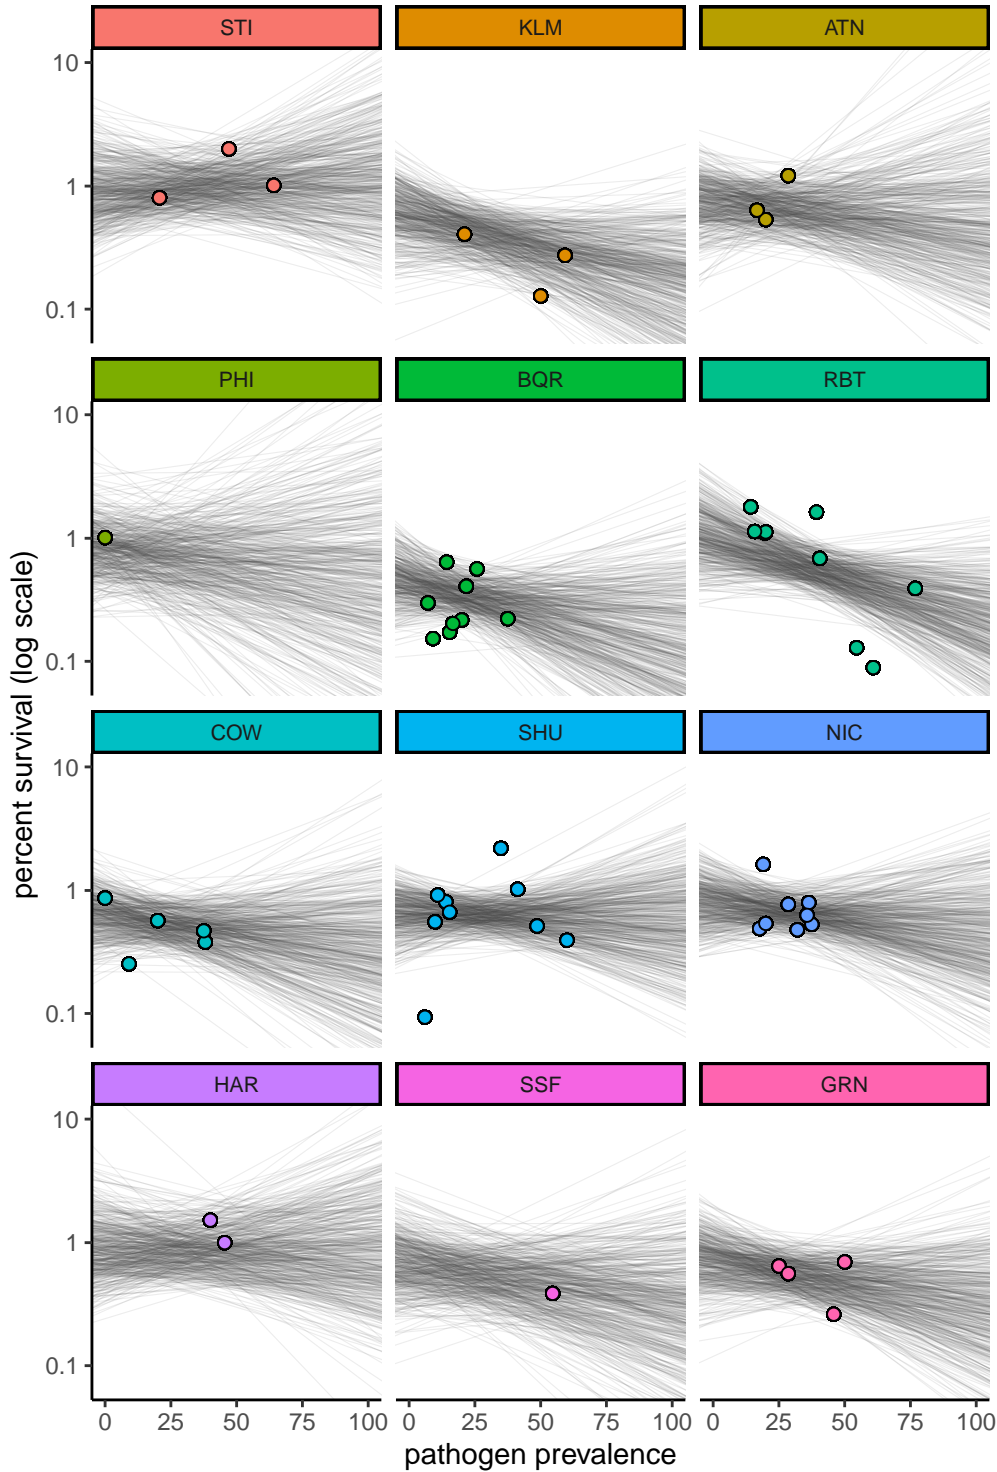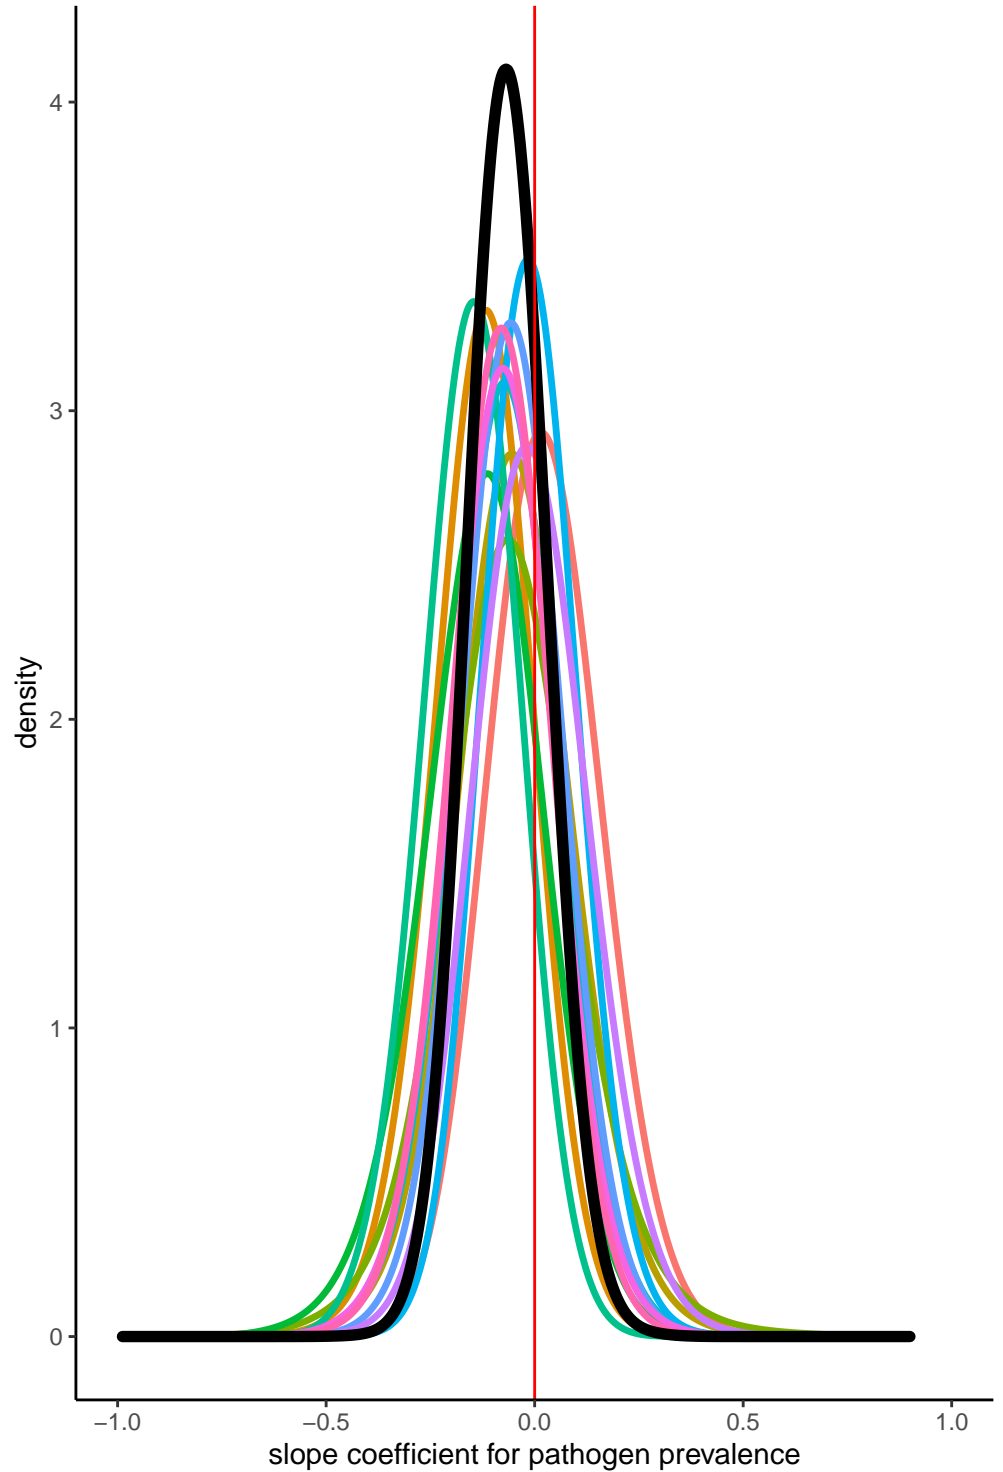

Myxobolus arcticus SpSu

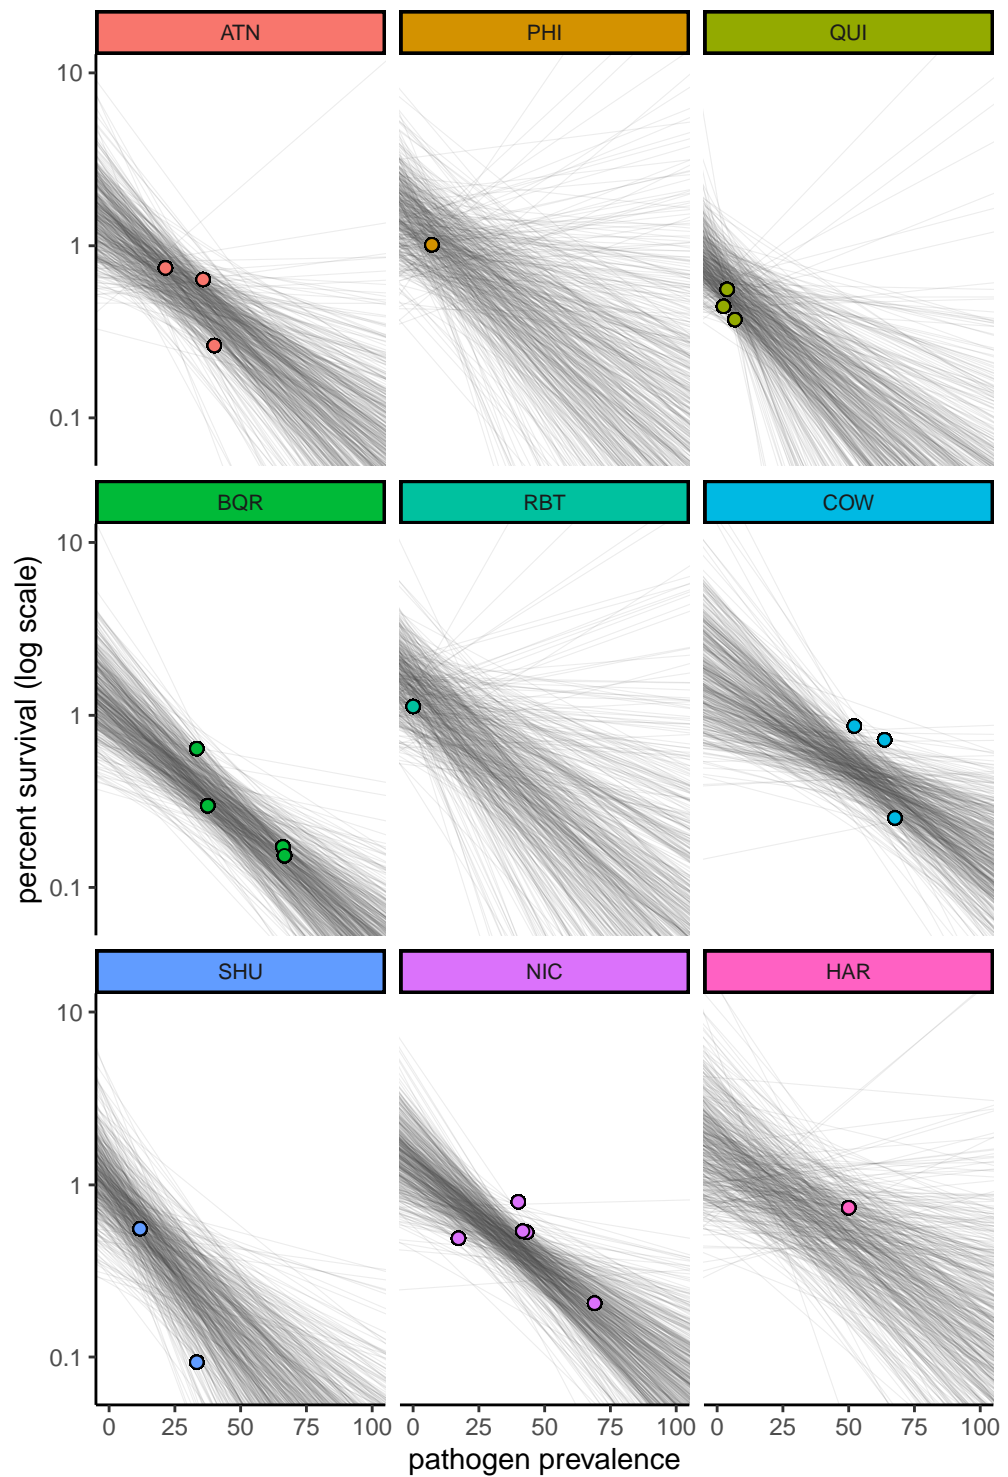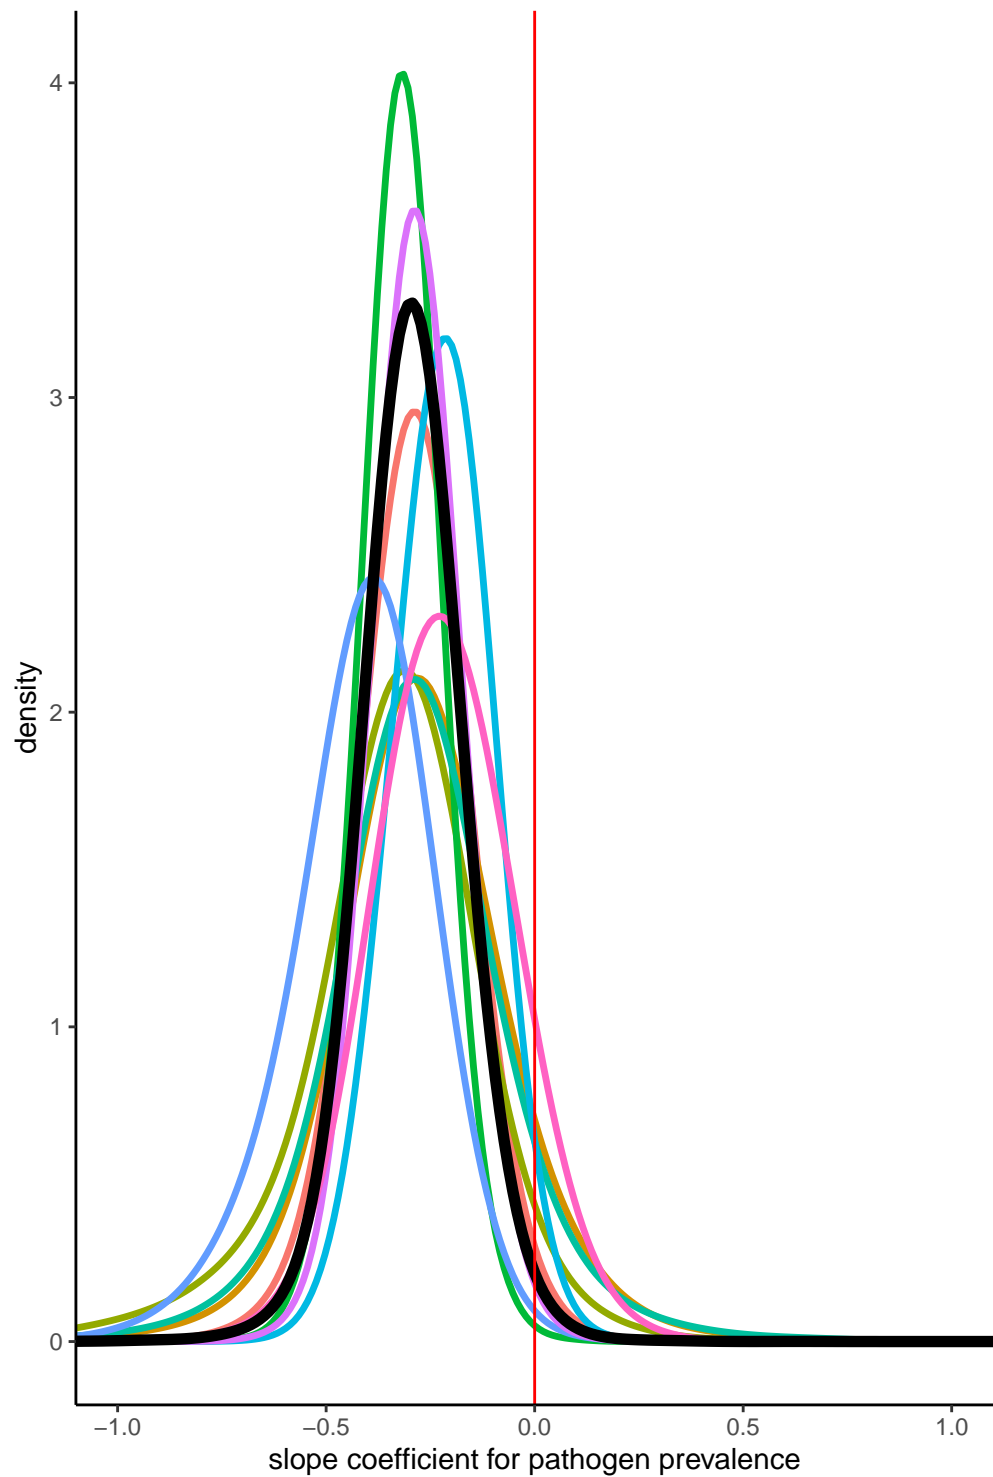

Myxobolus arcticus FaWi

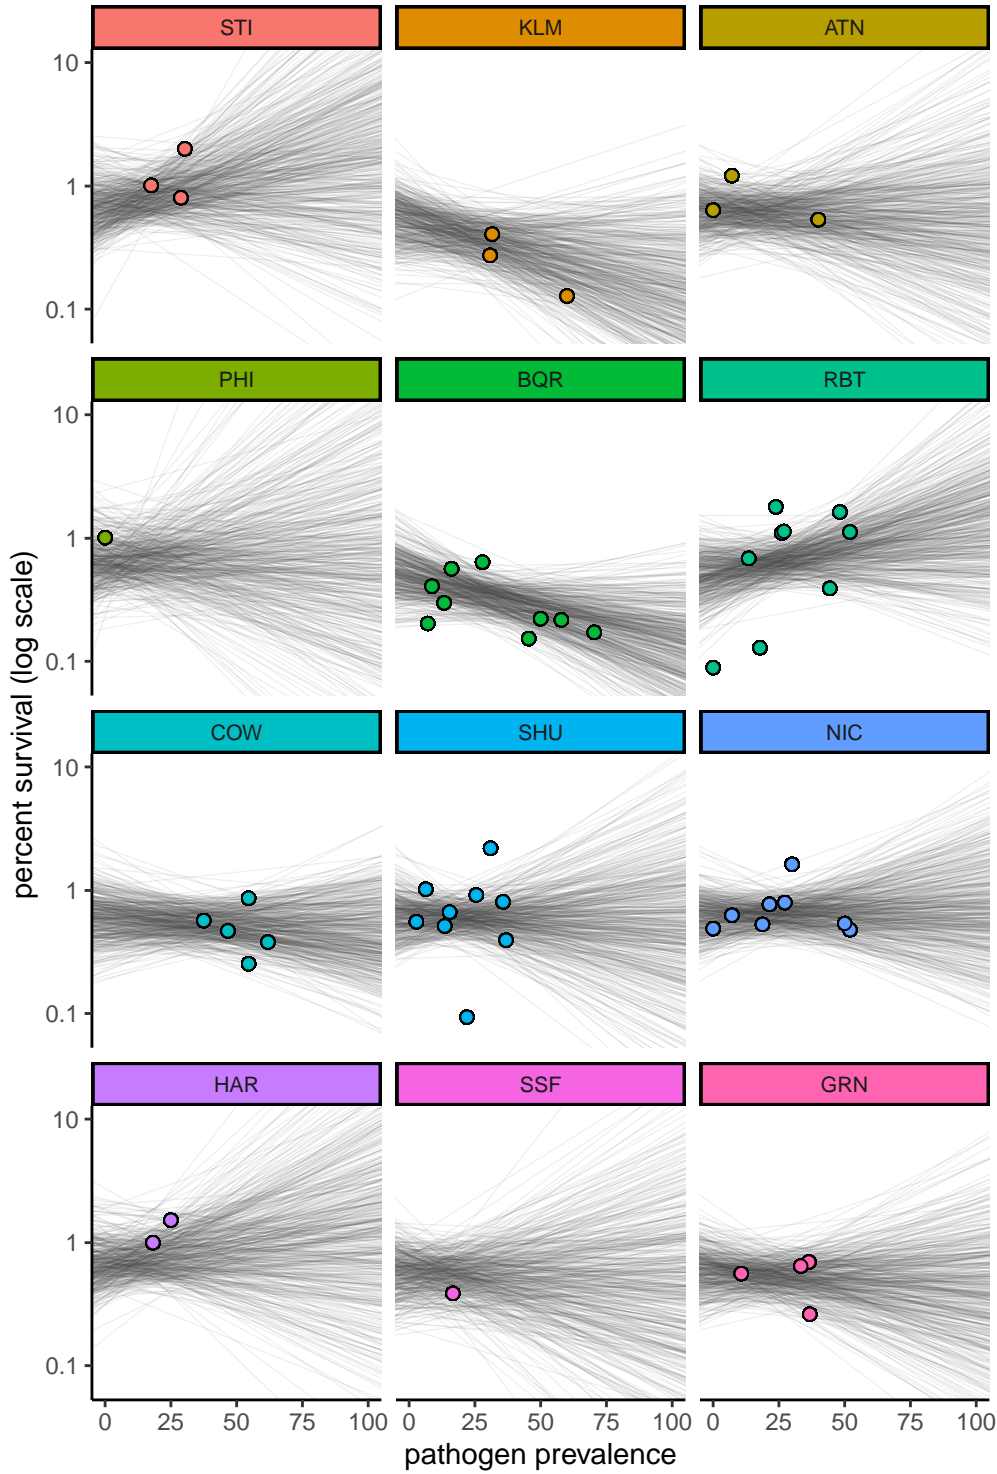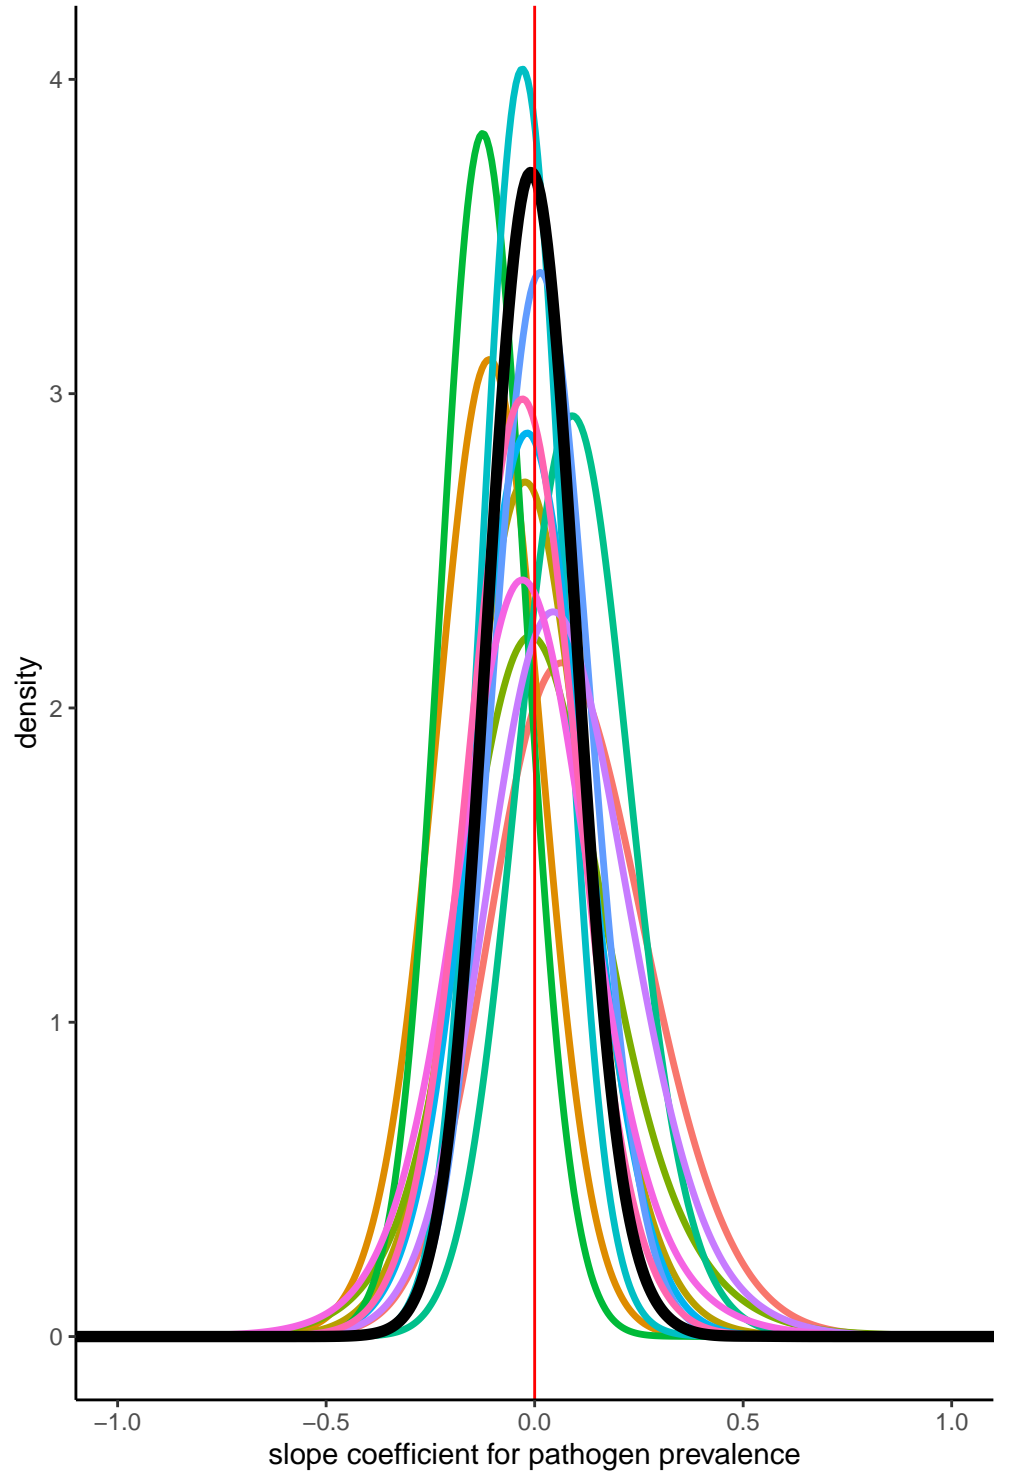

Nanophyetus salmincola SpSu

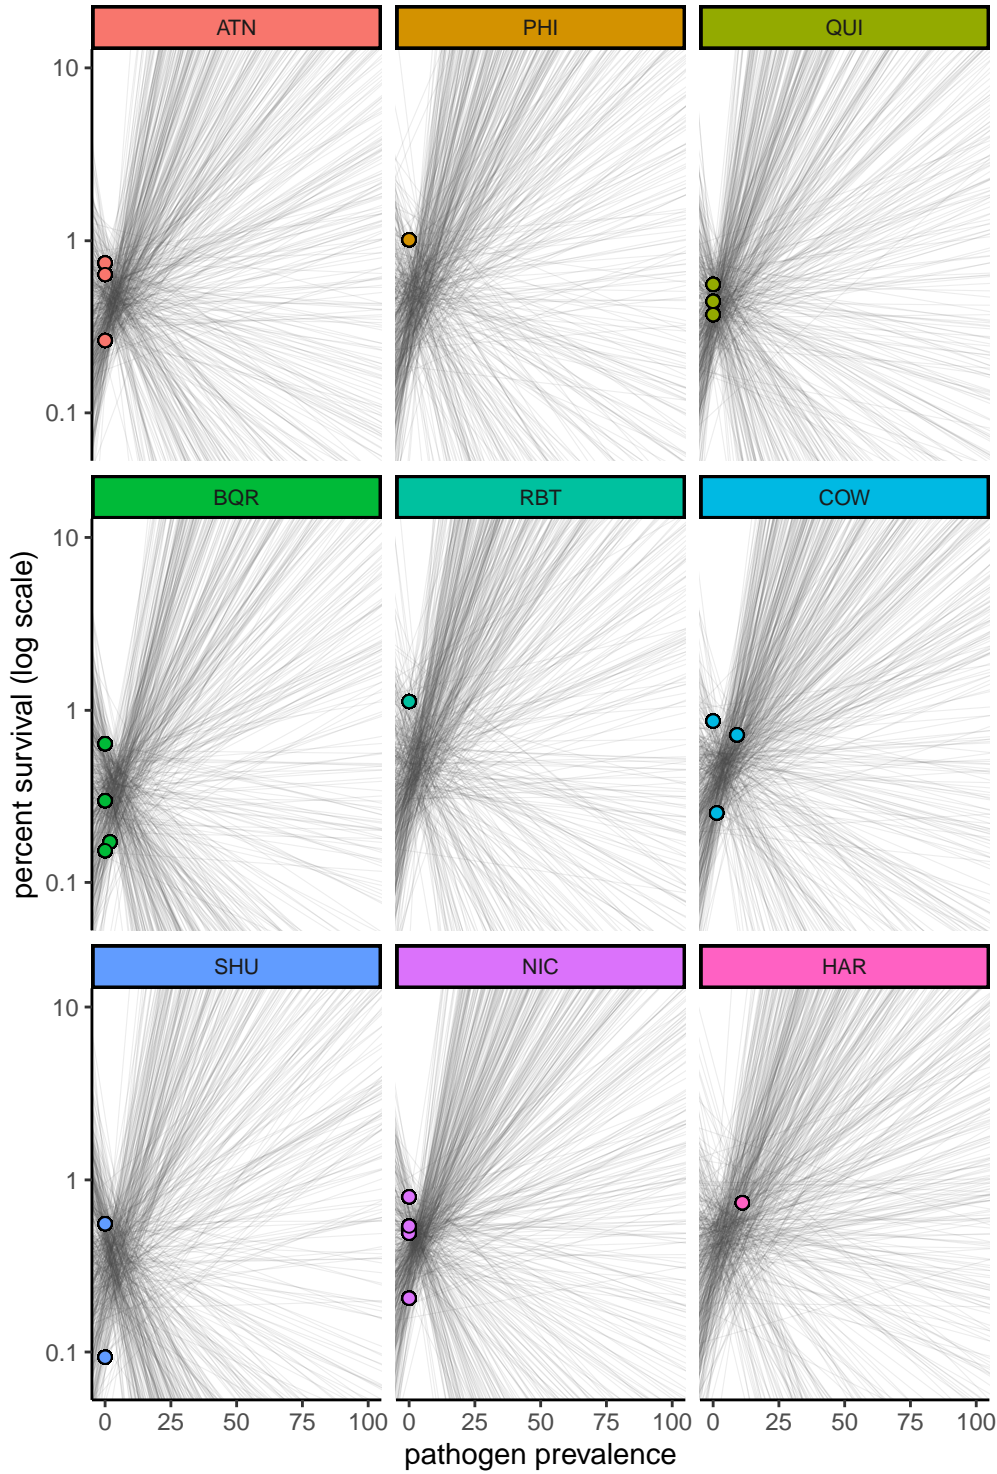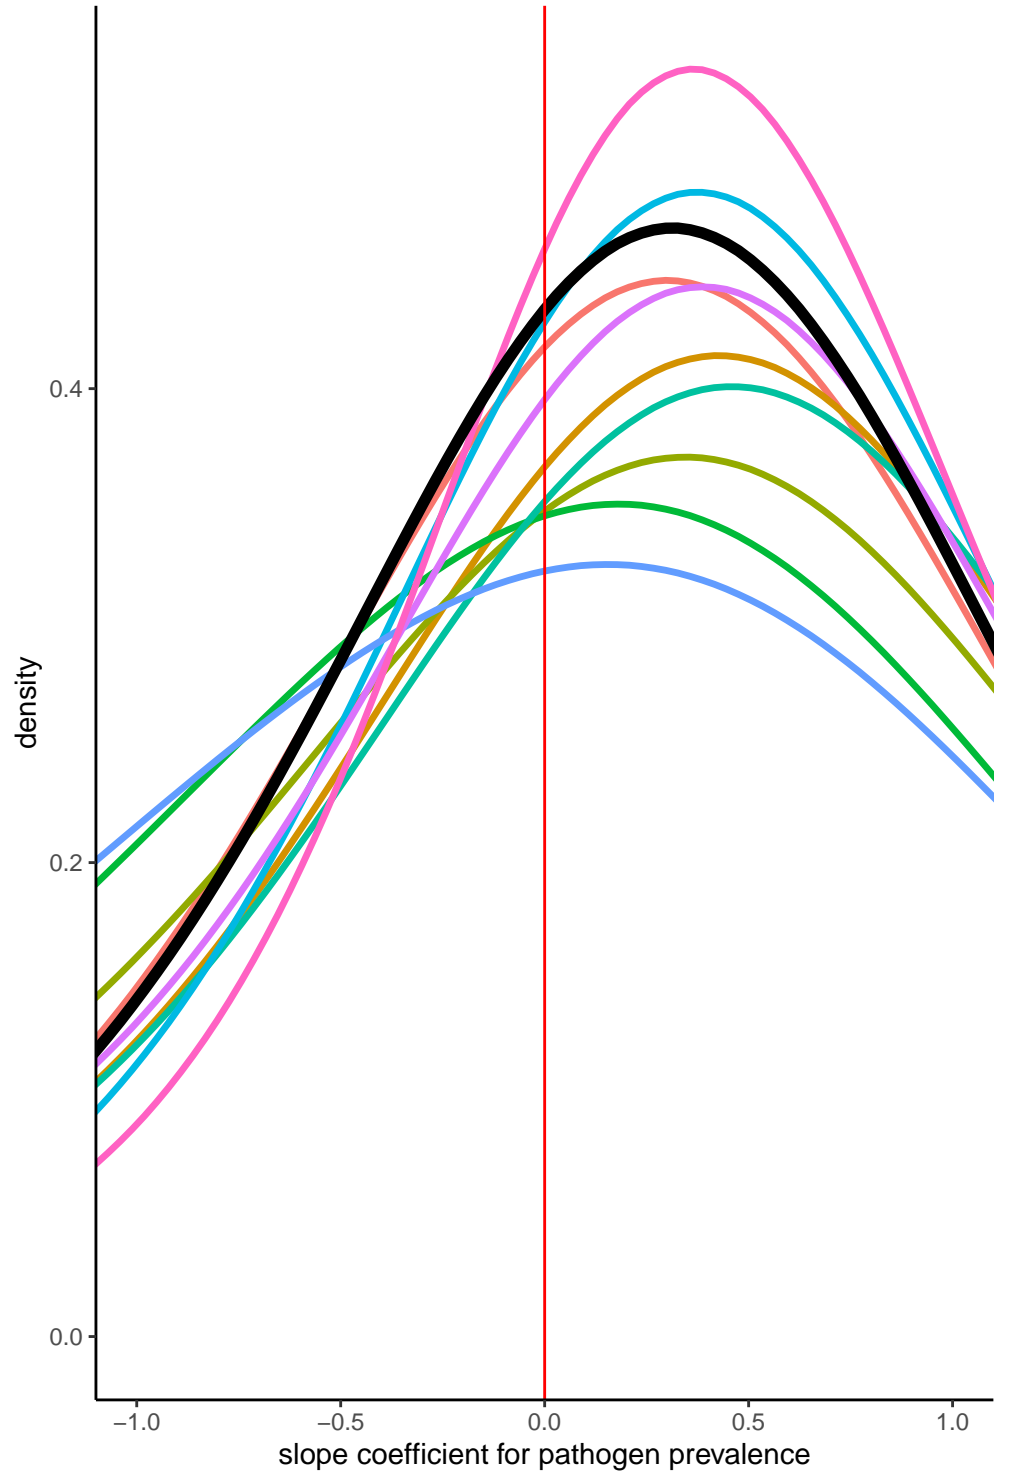

Nanophyetus salmincola FaWi

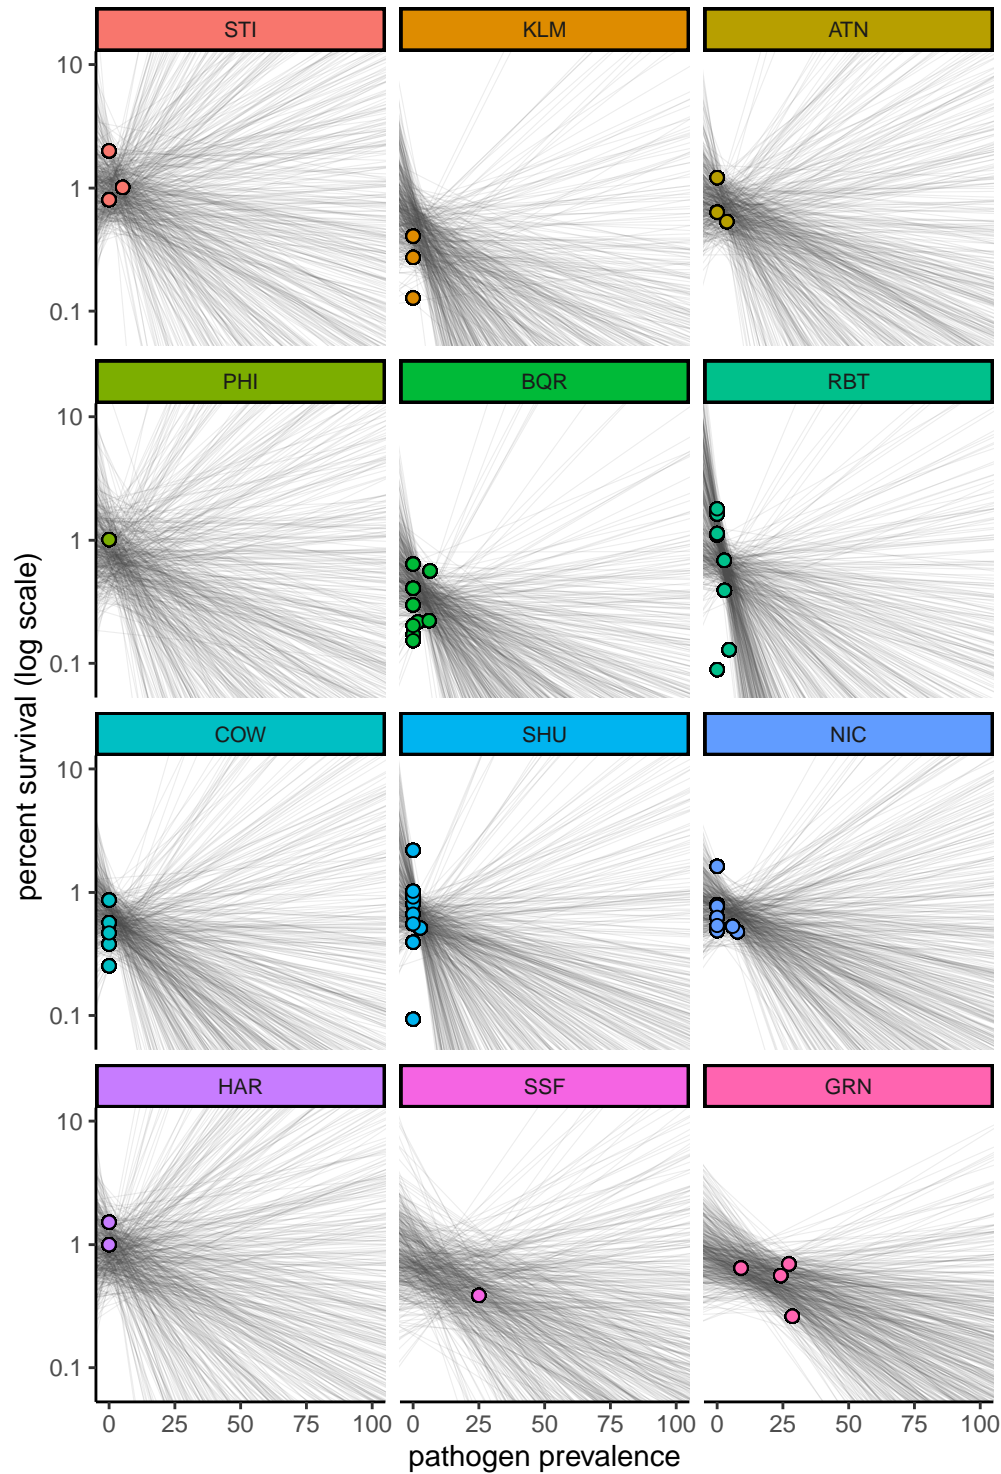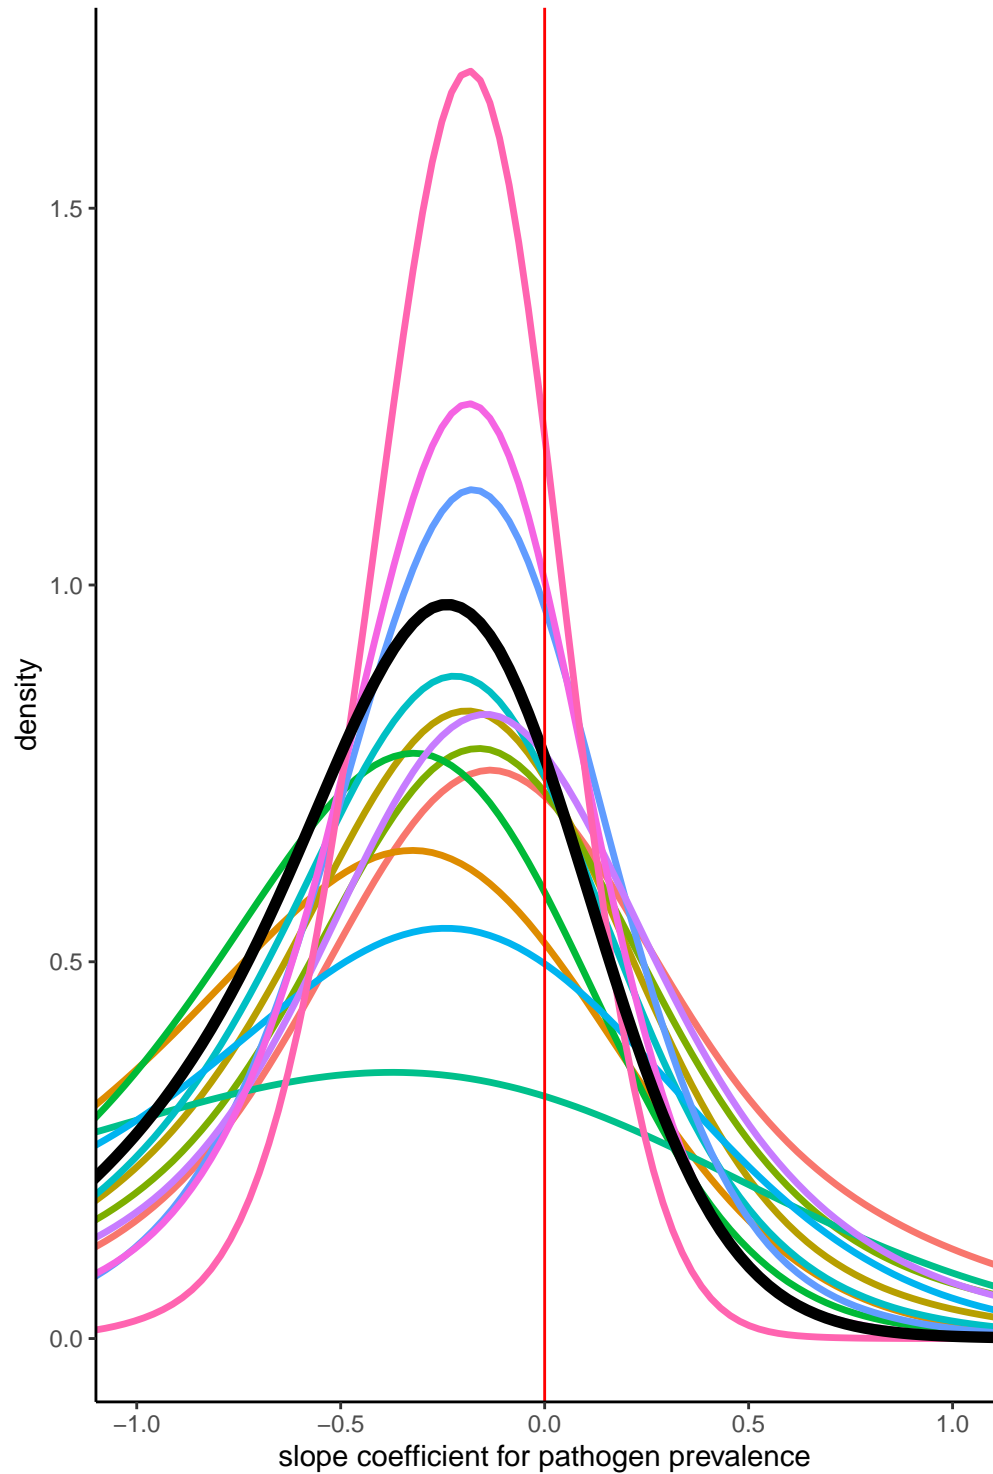



Parvicapsula kabatai SpSu

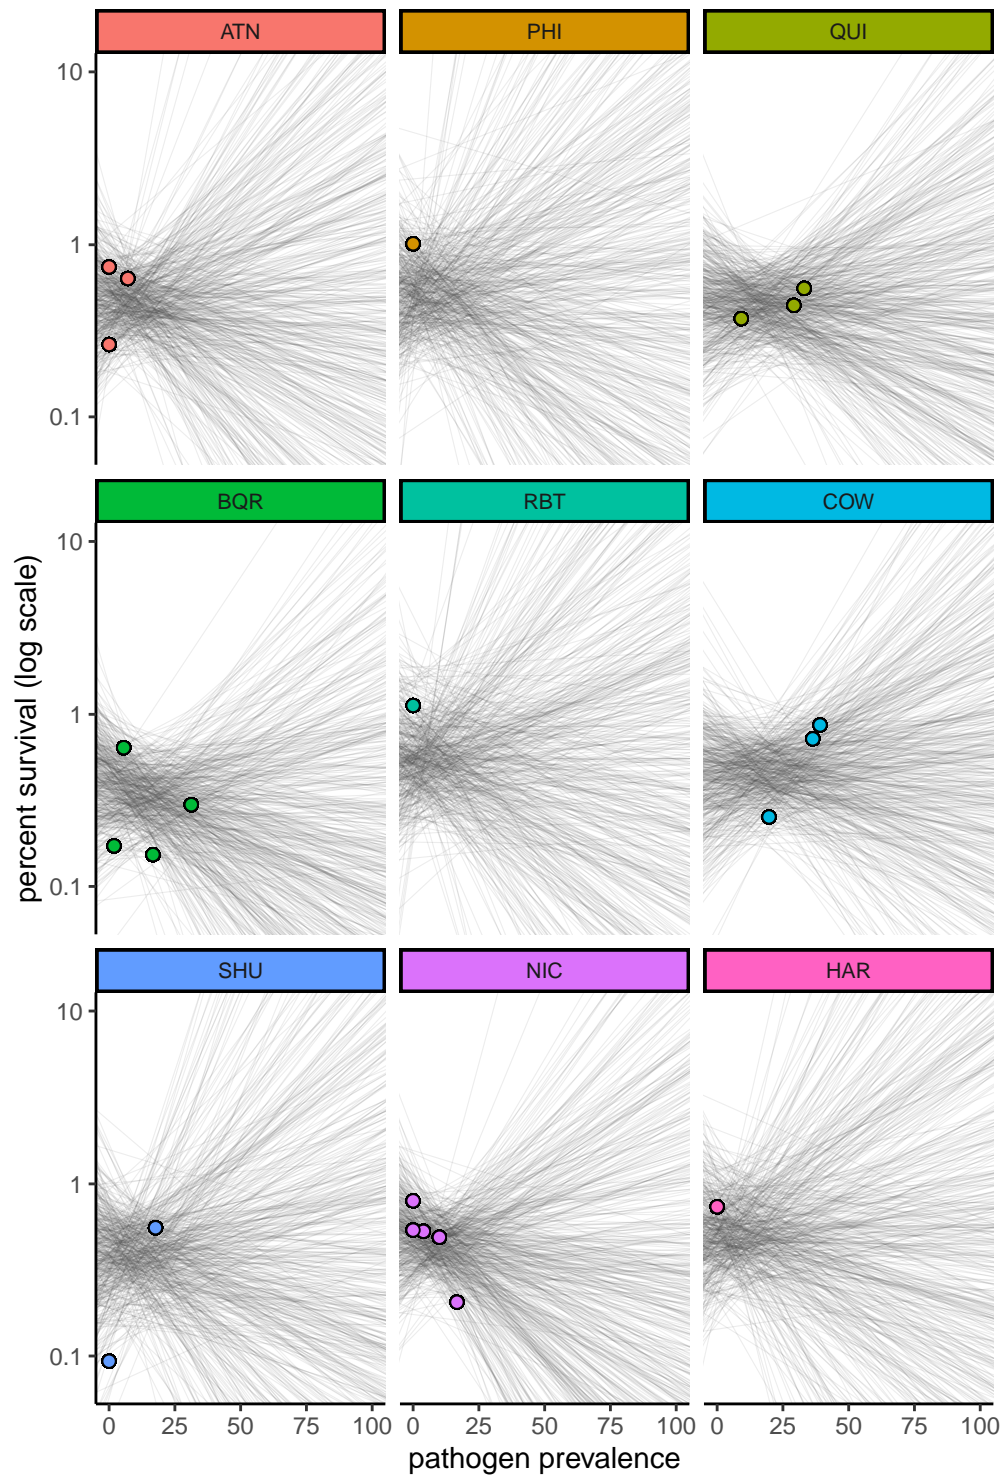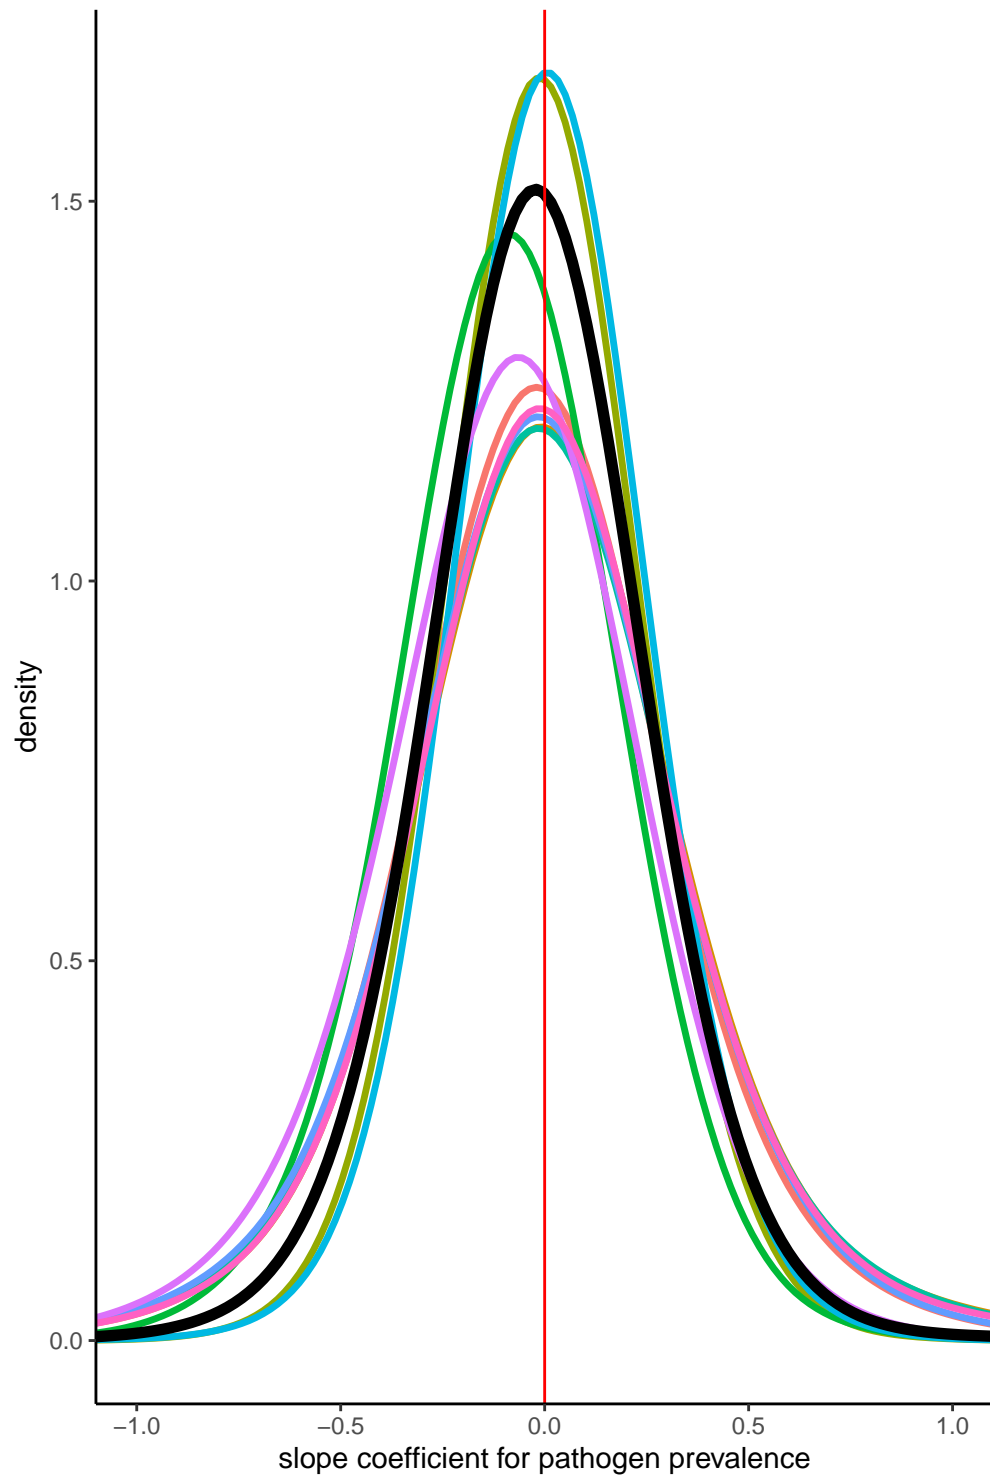

Parvicapsula minibicornis SpSu

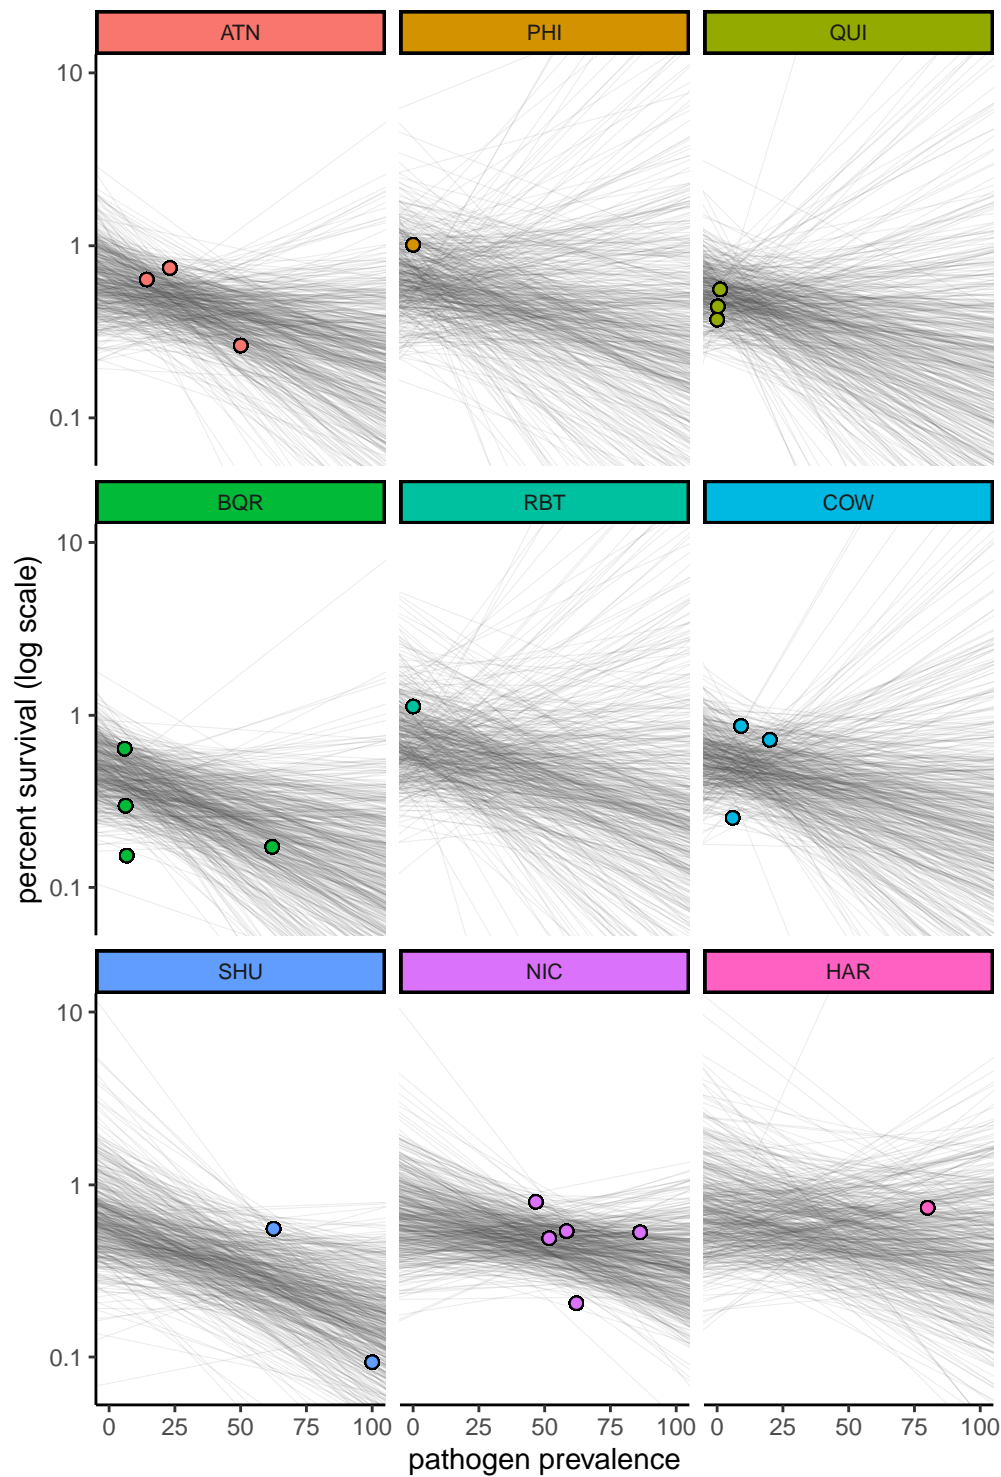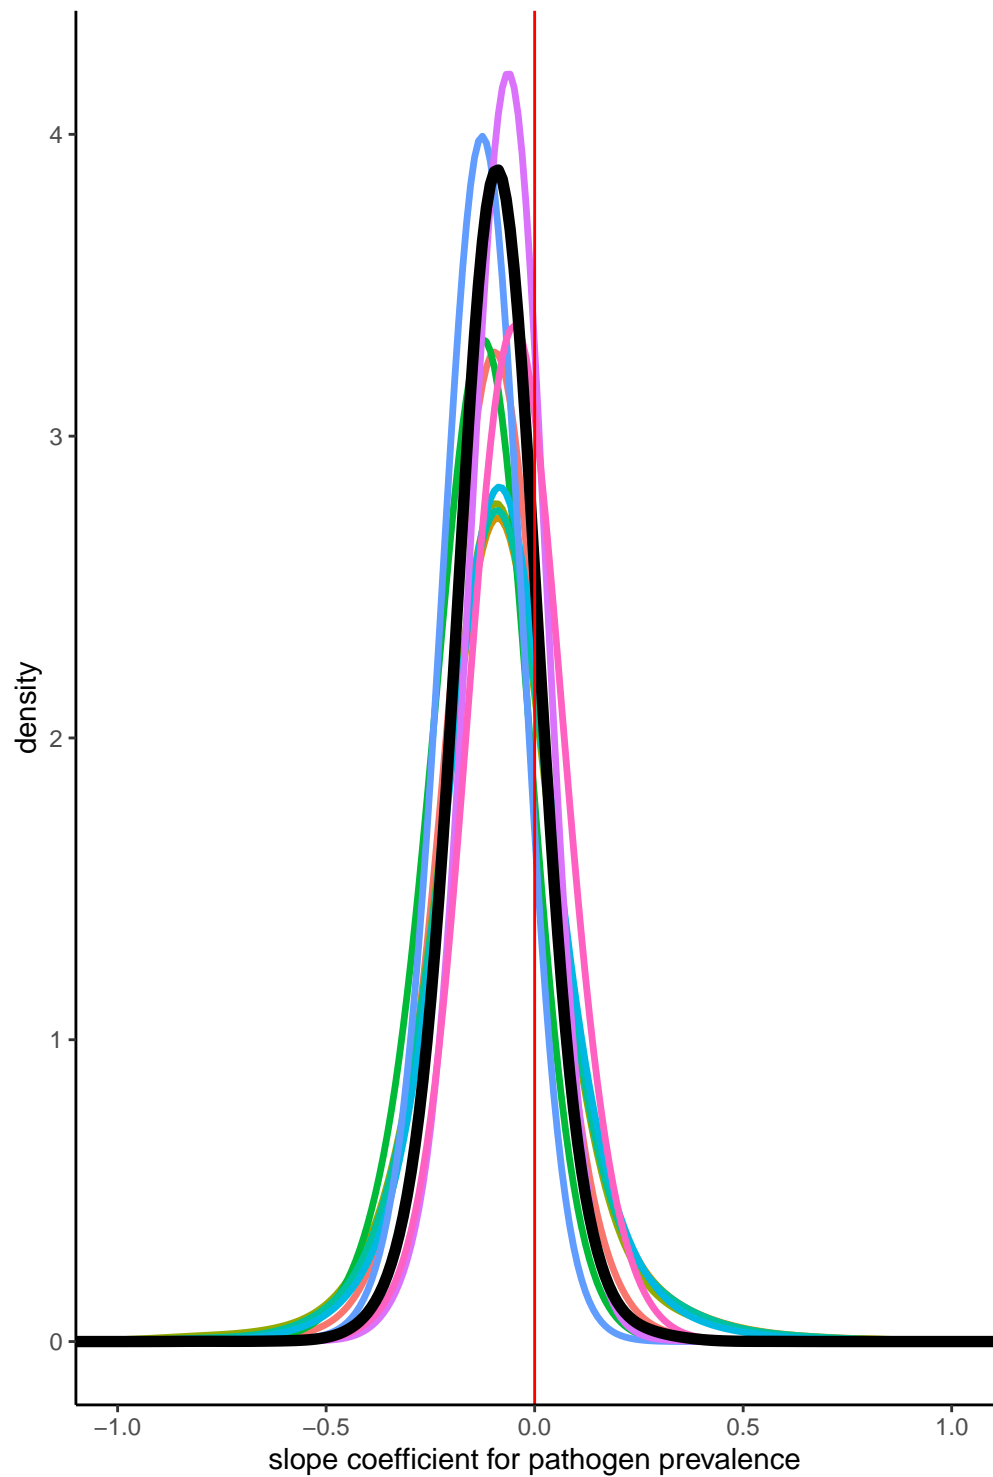

Parvicapsula minibicornis FaWi

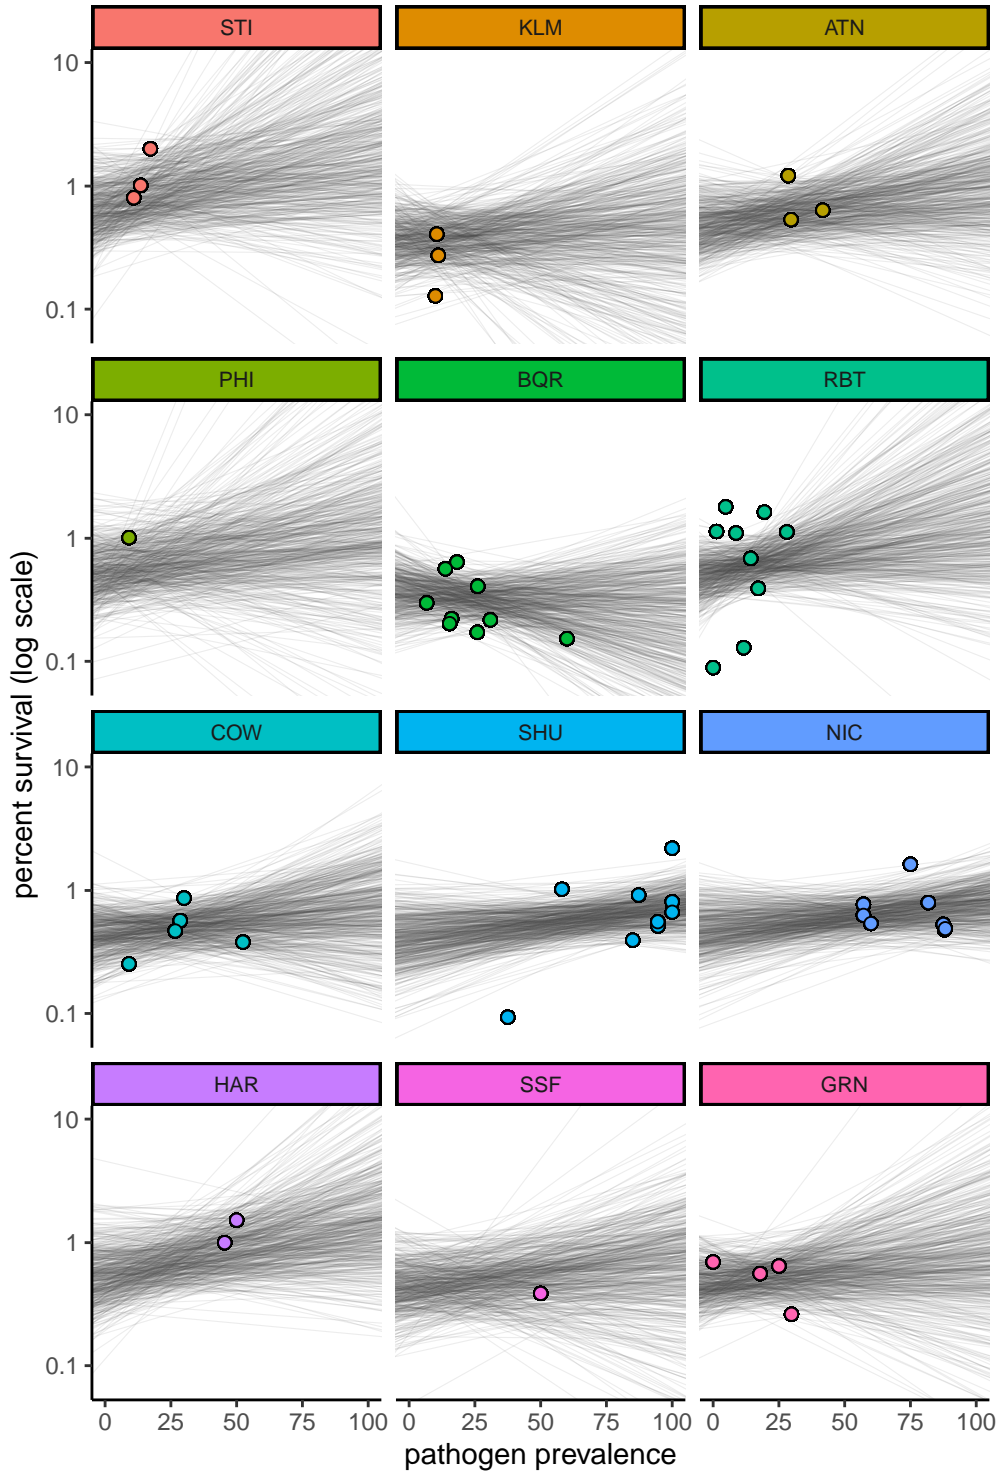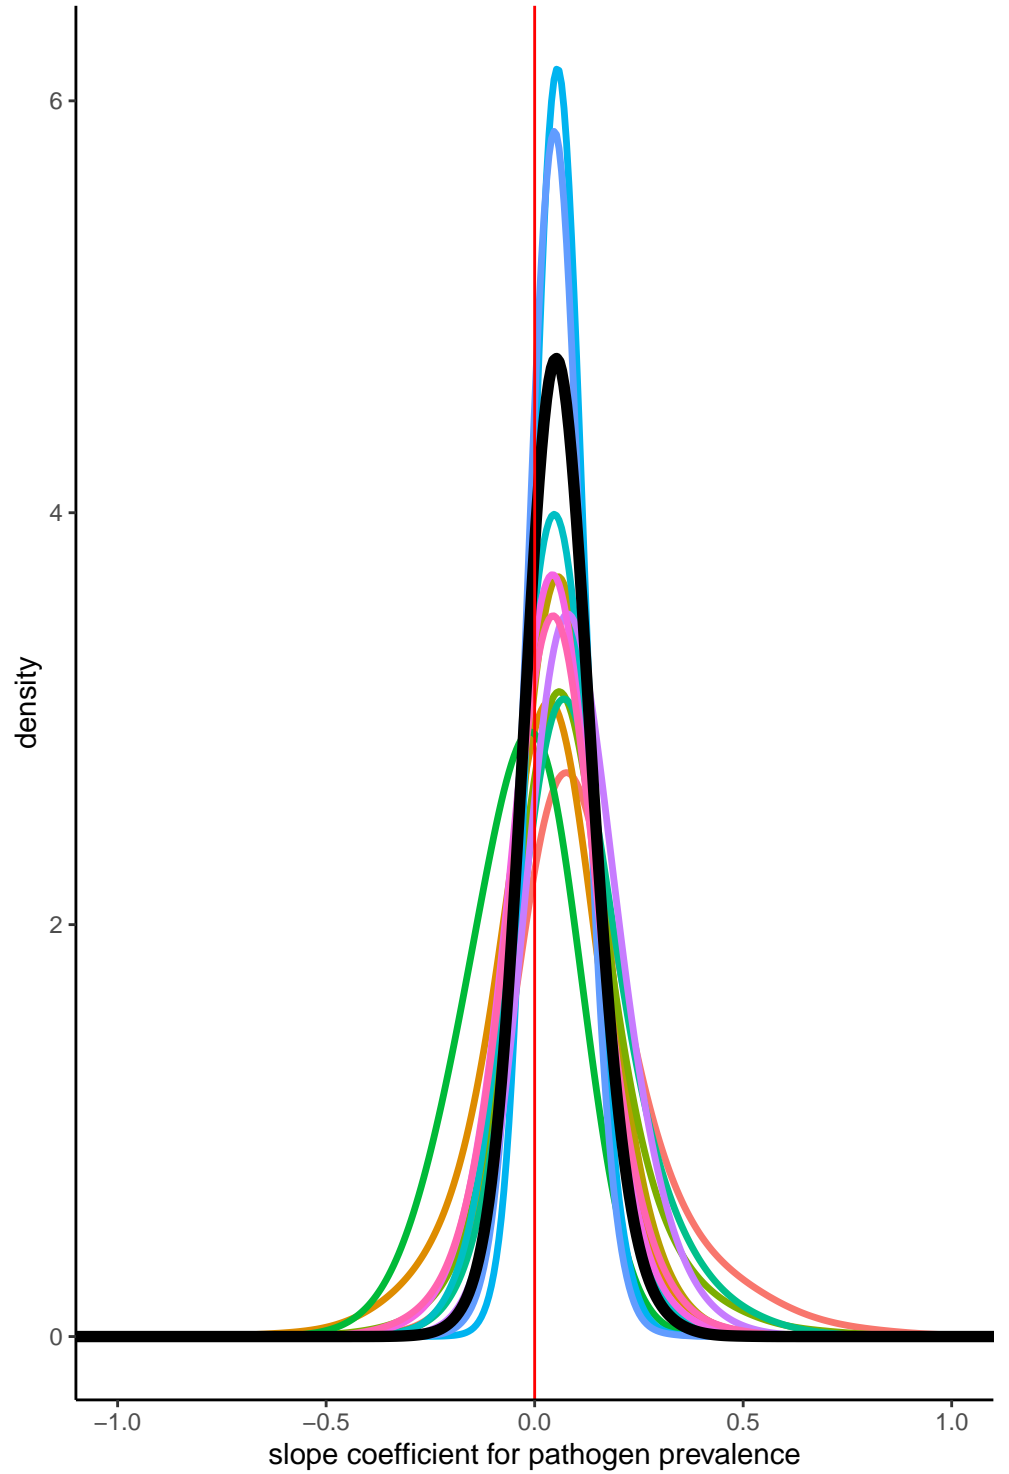

Parvicapsula pseudobranchicola SpSu

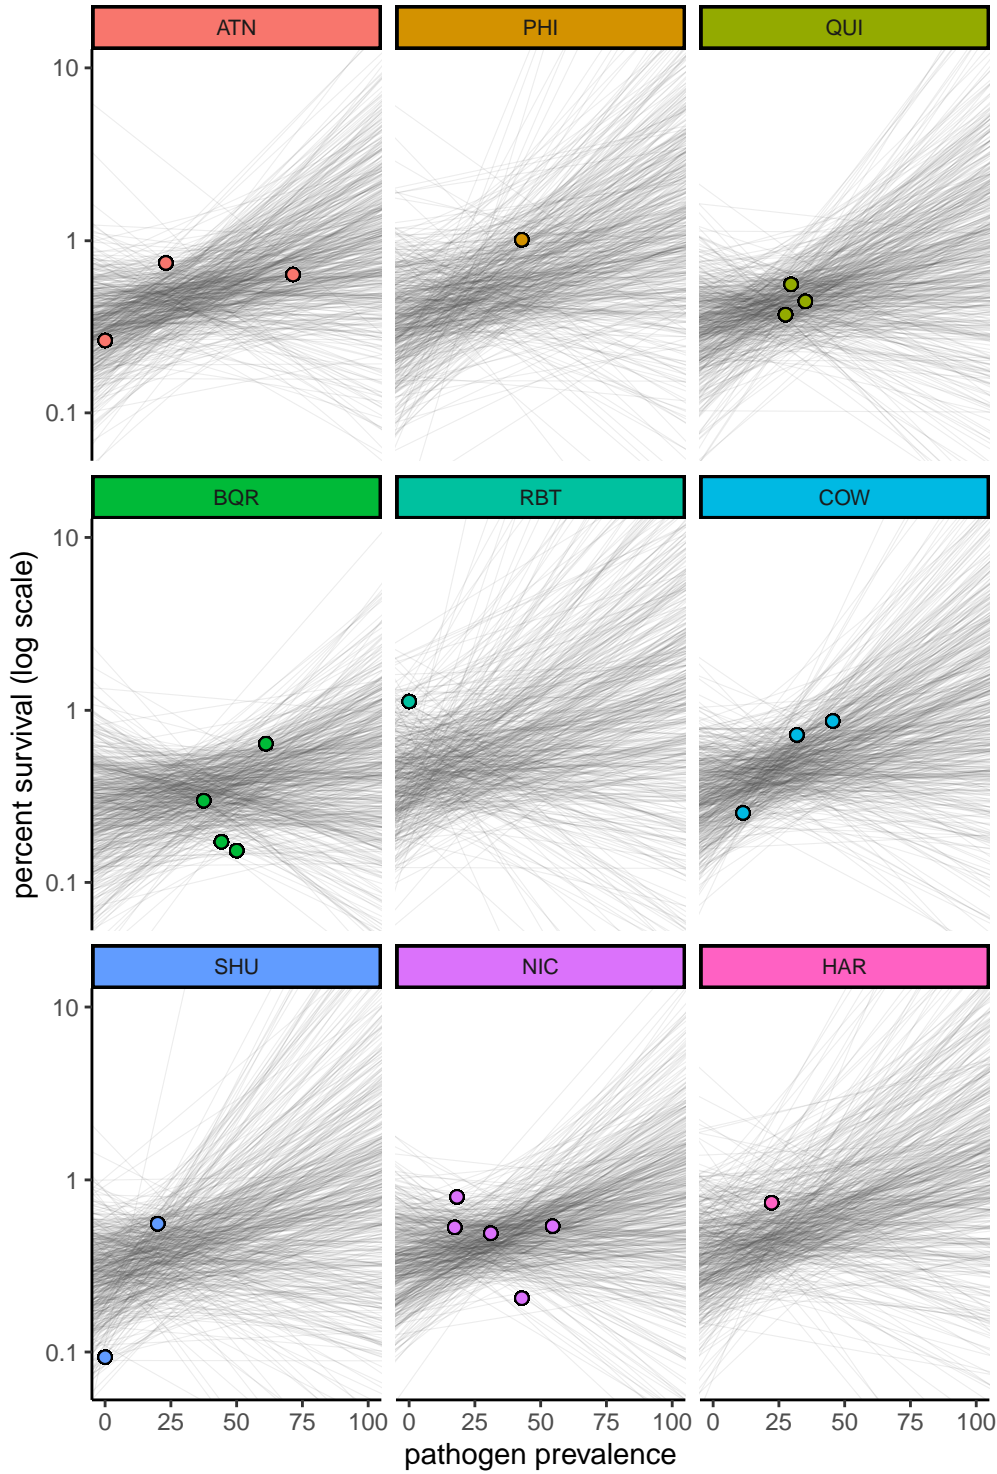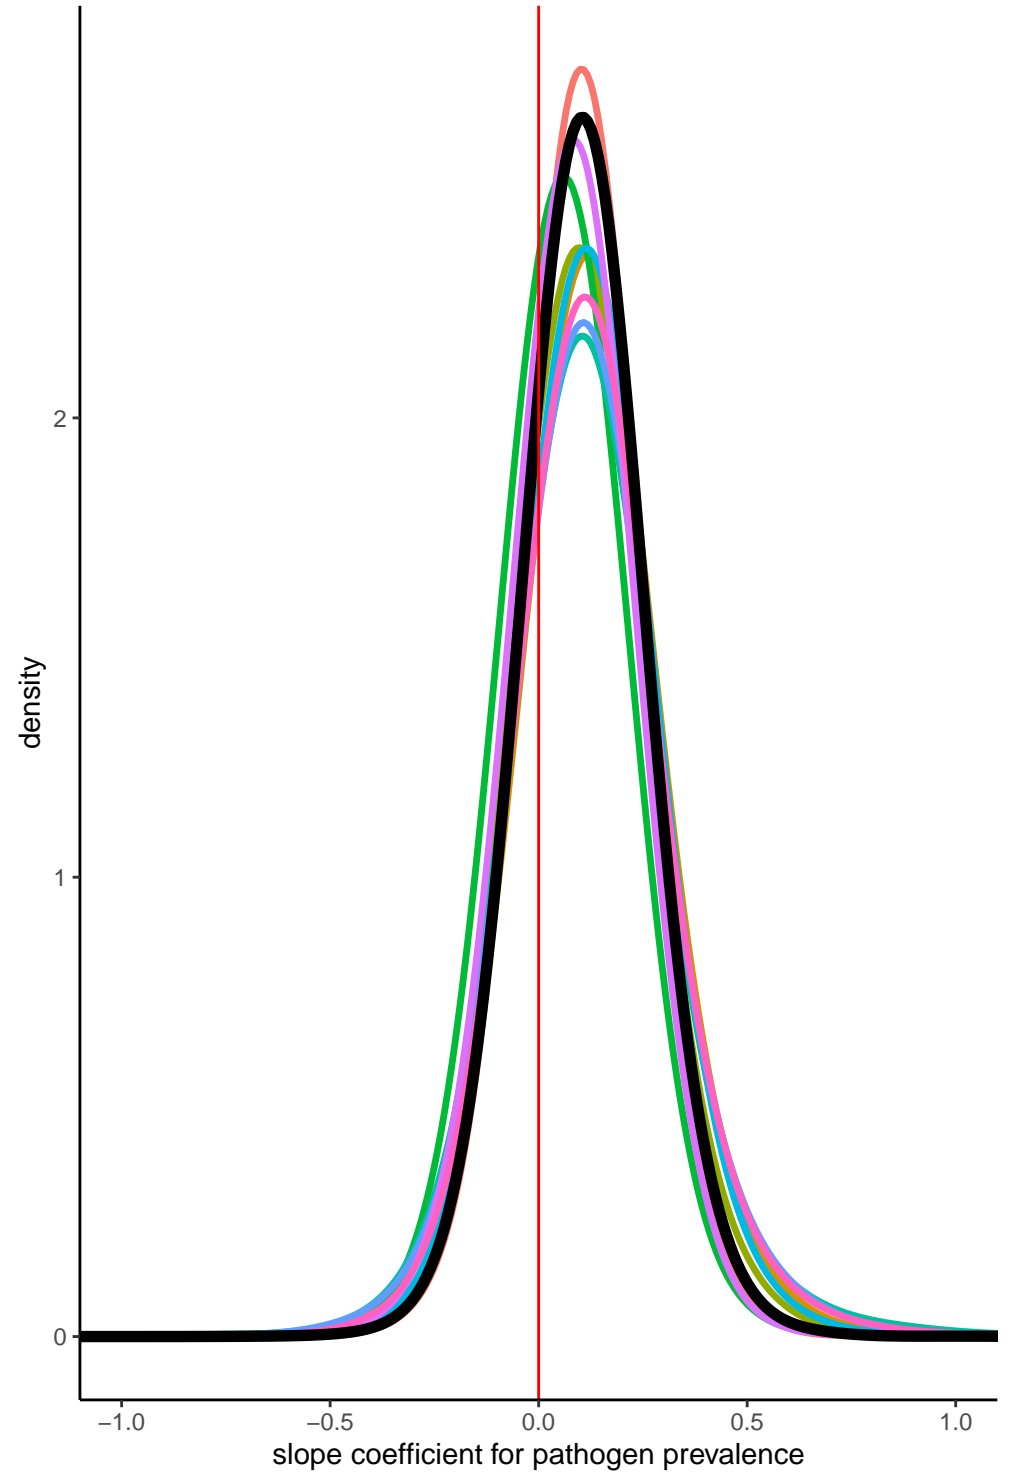

Parvicapsula pseudobranchicola FaWi

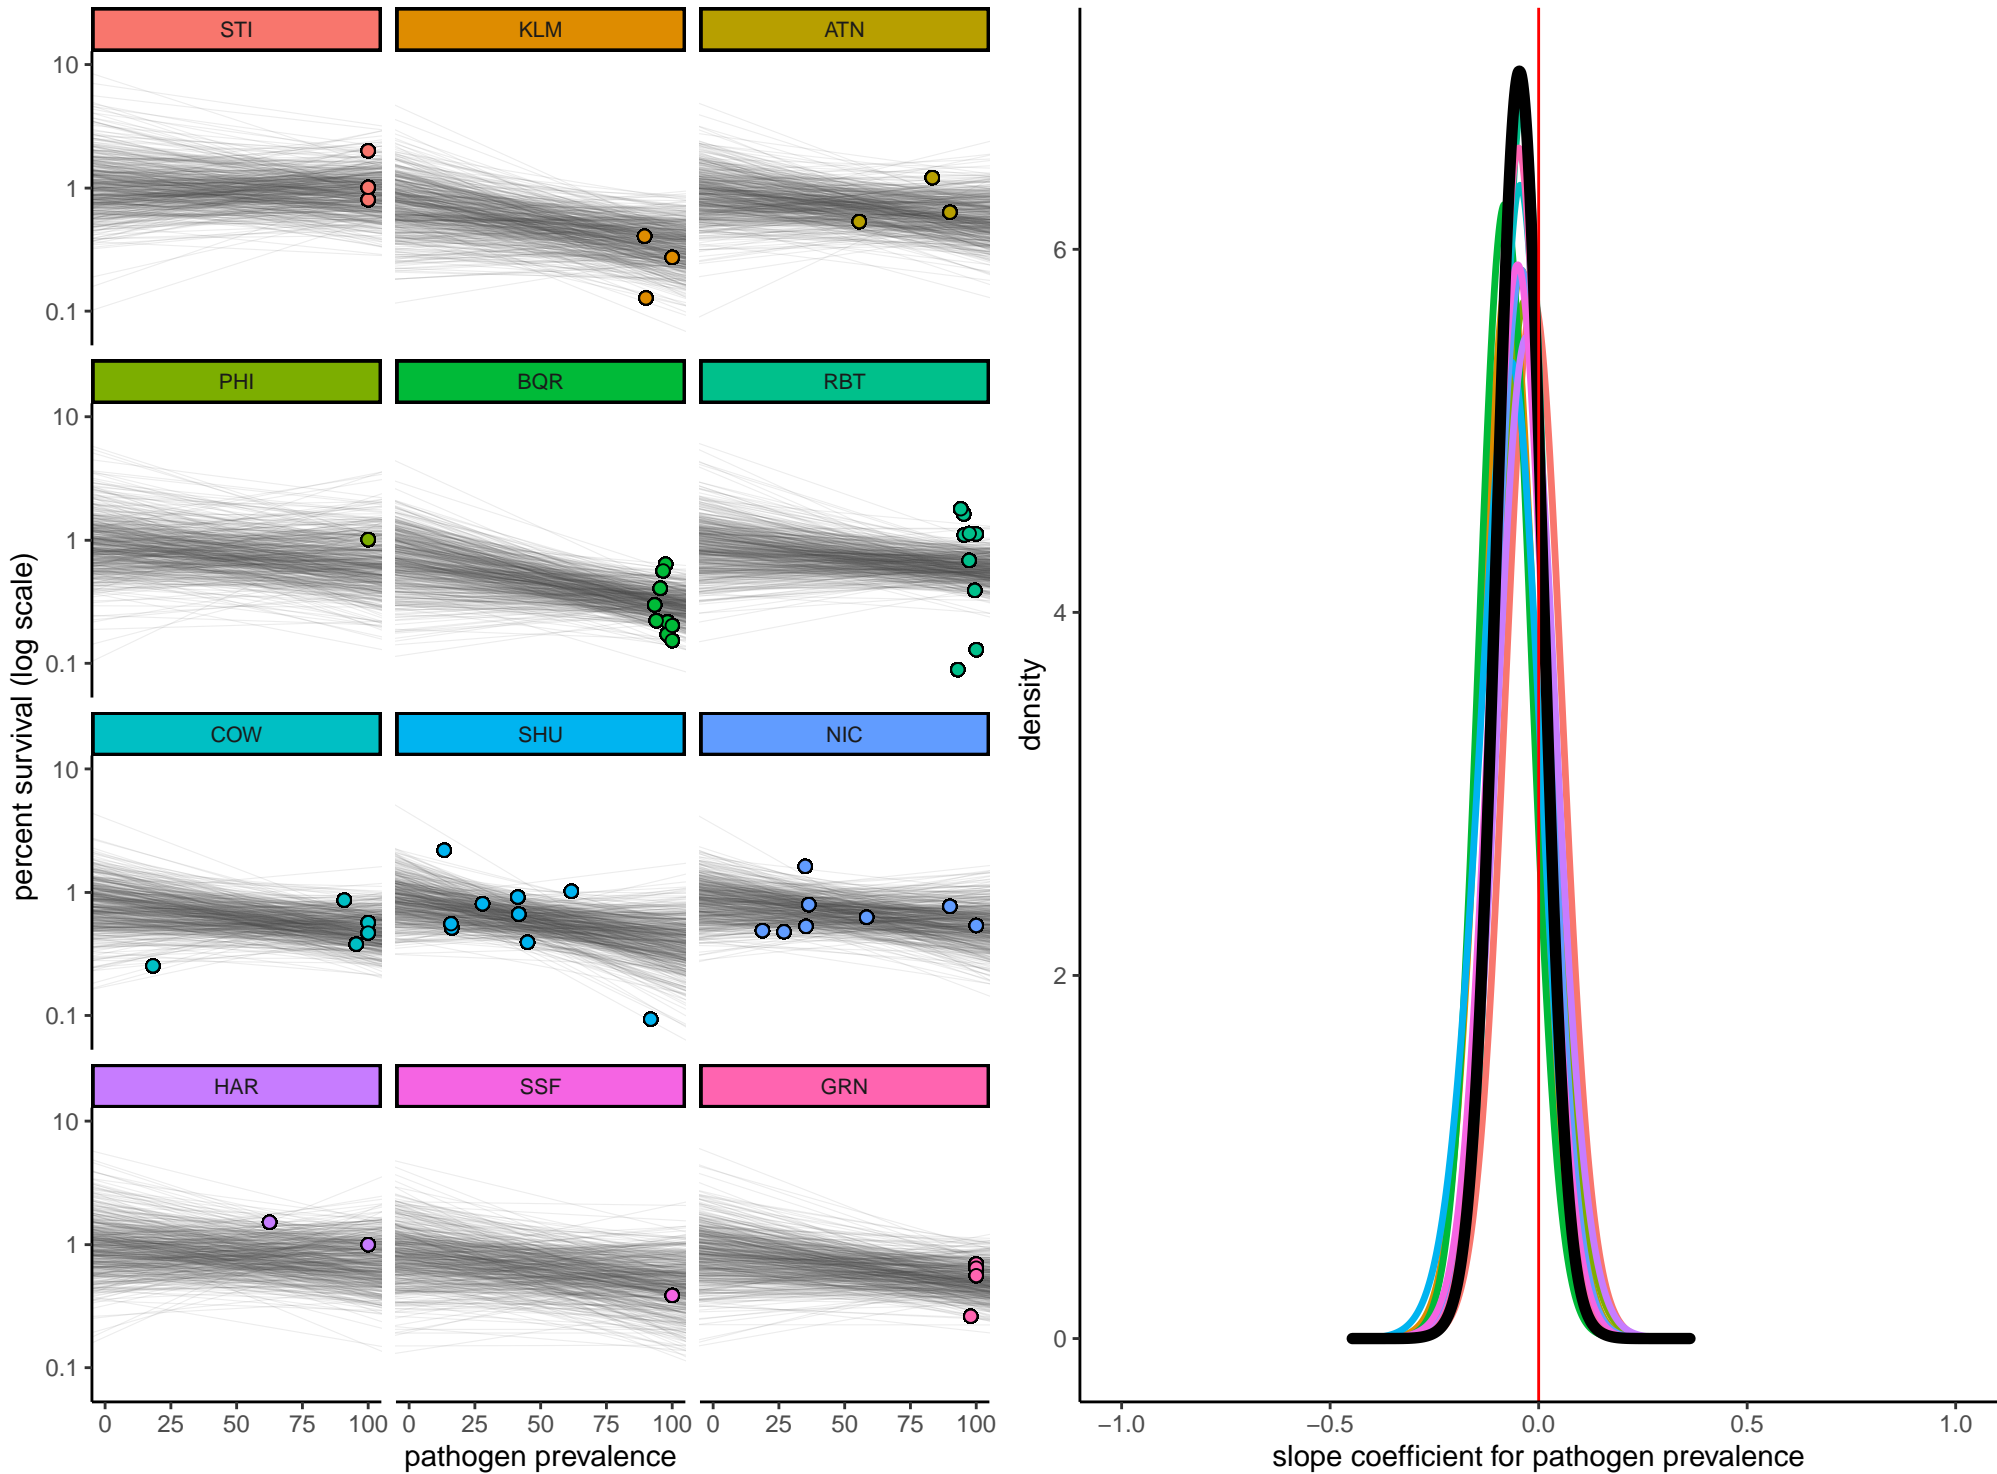

Paranucleospora theridion SpSu

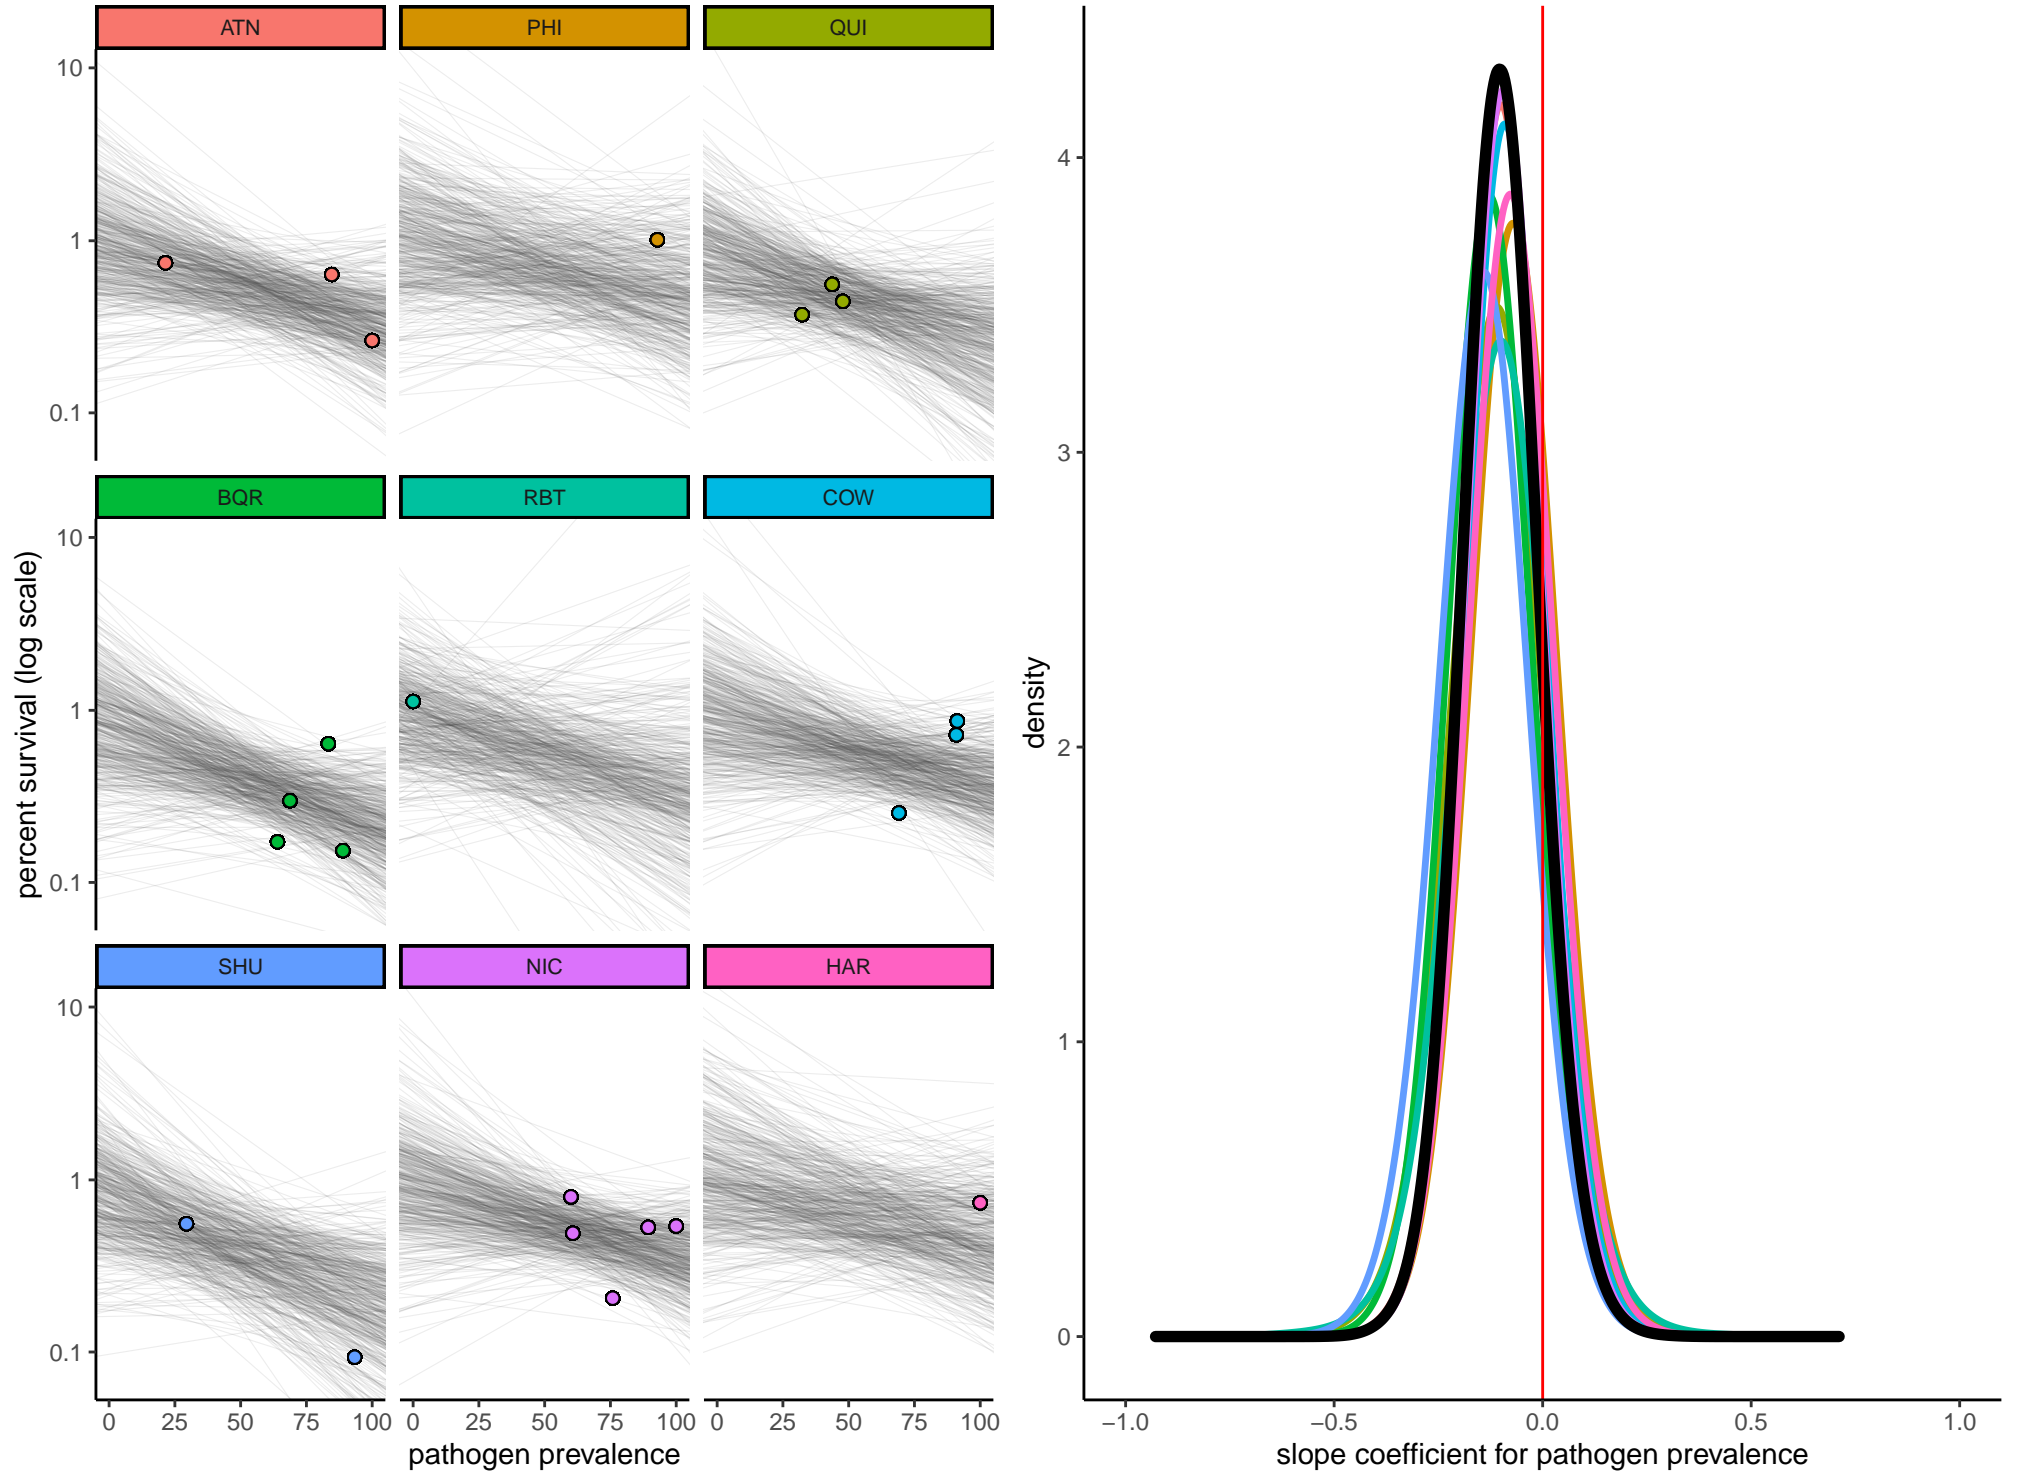

Paranucleospora theridion FaWi

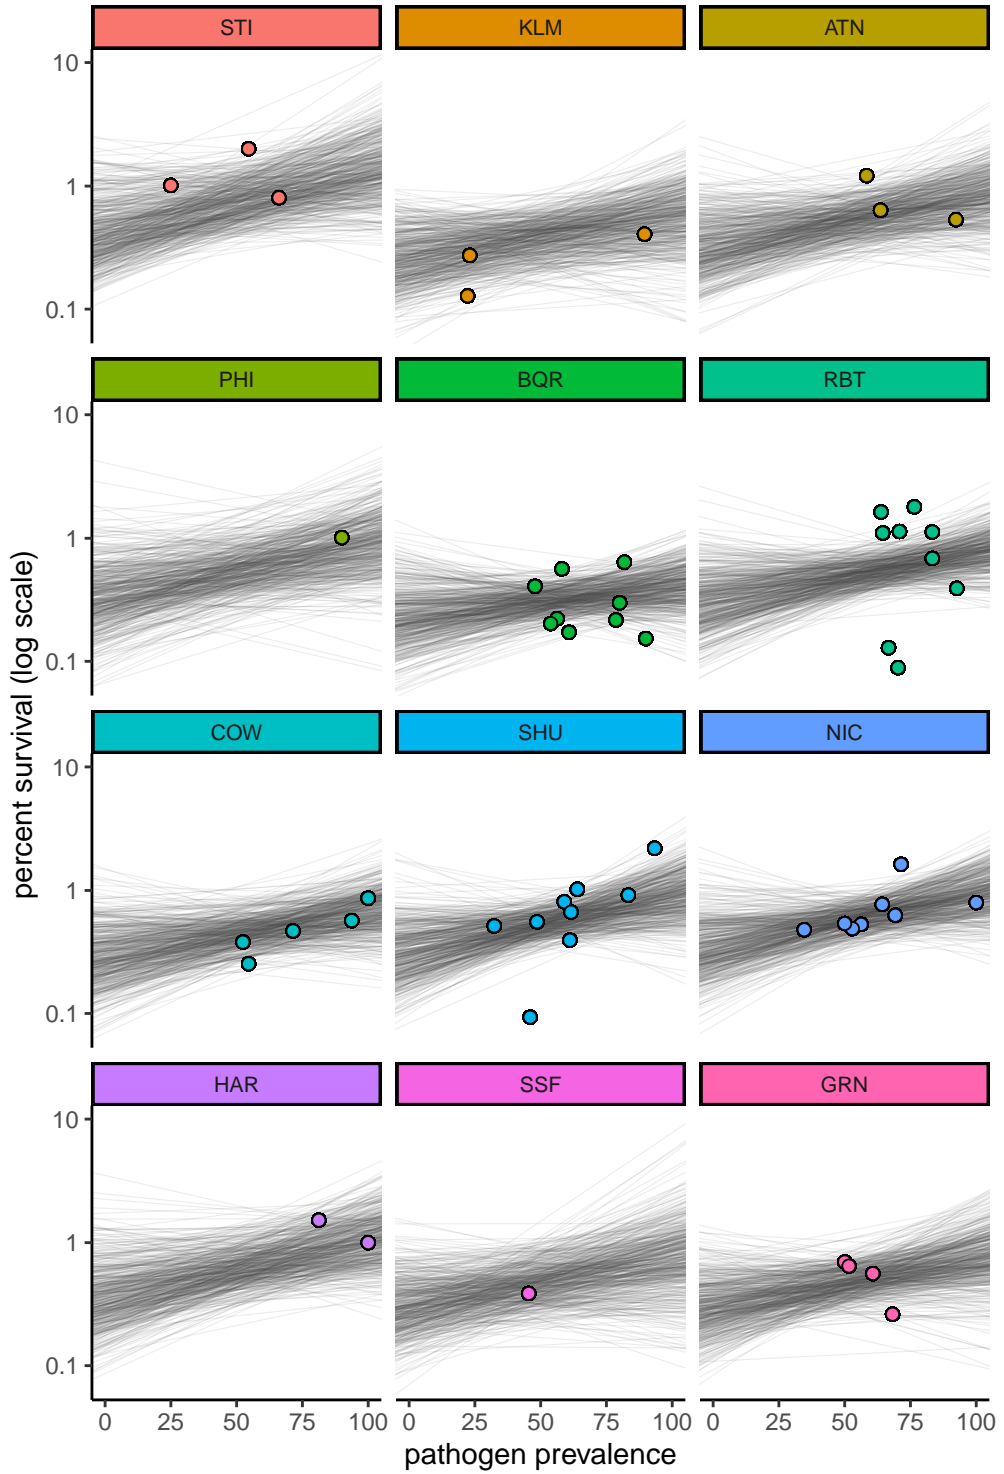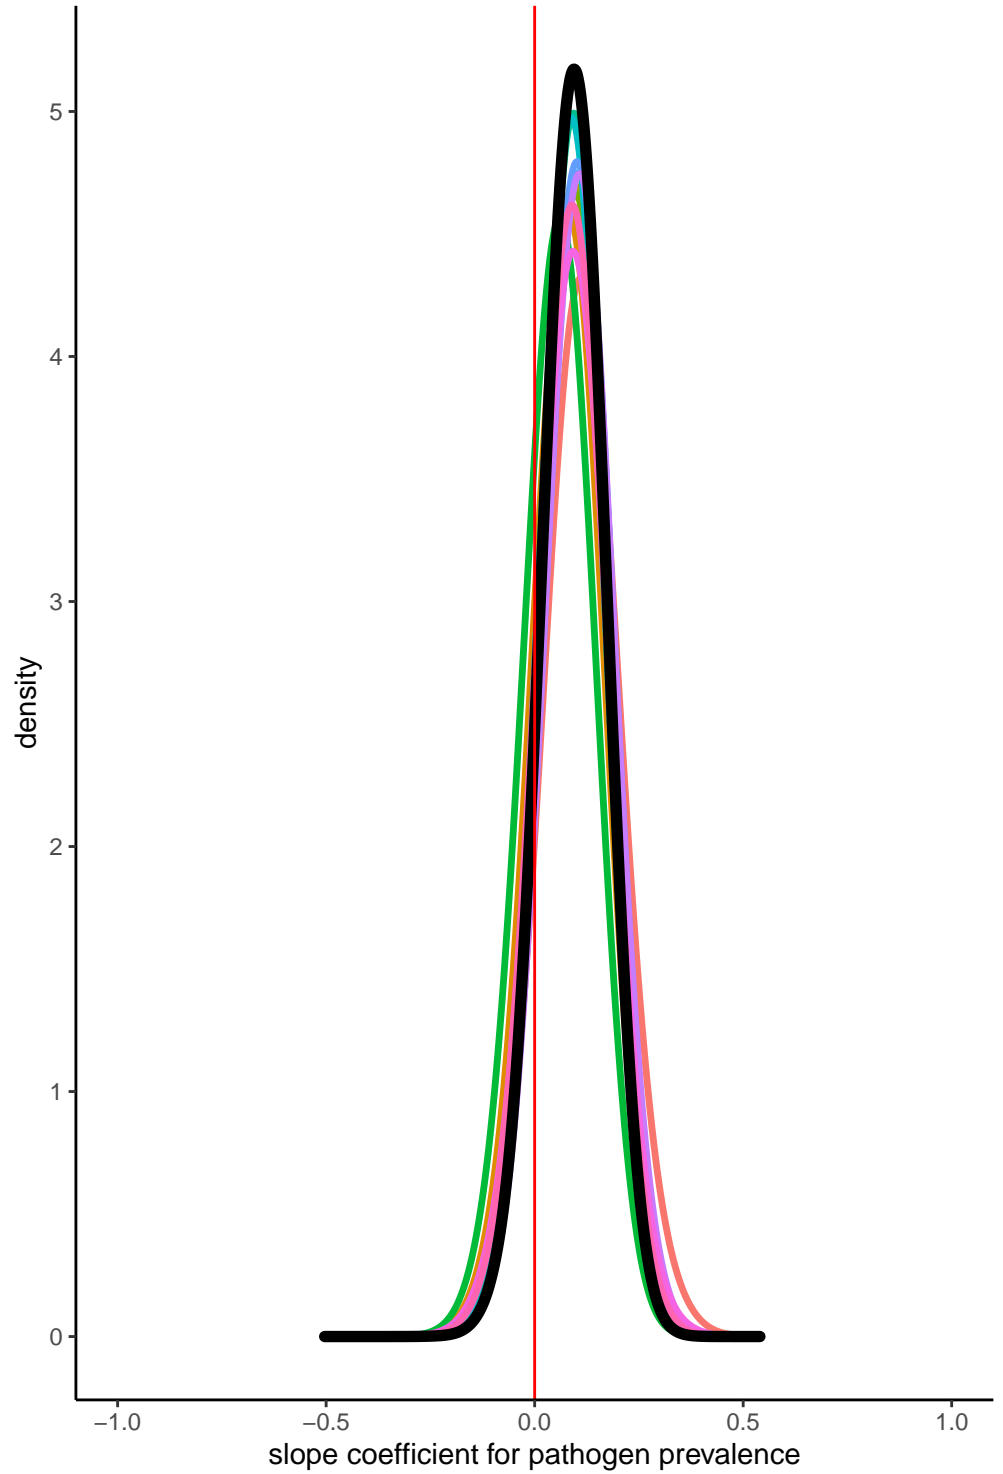

*Piscirickettsia salmonis* FaWi

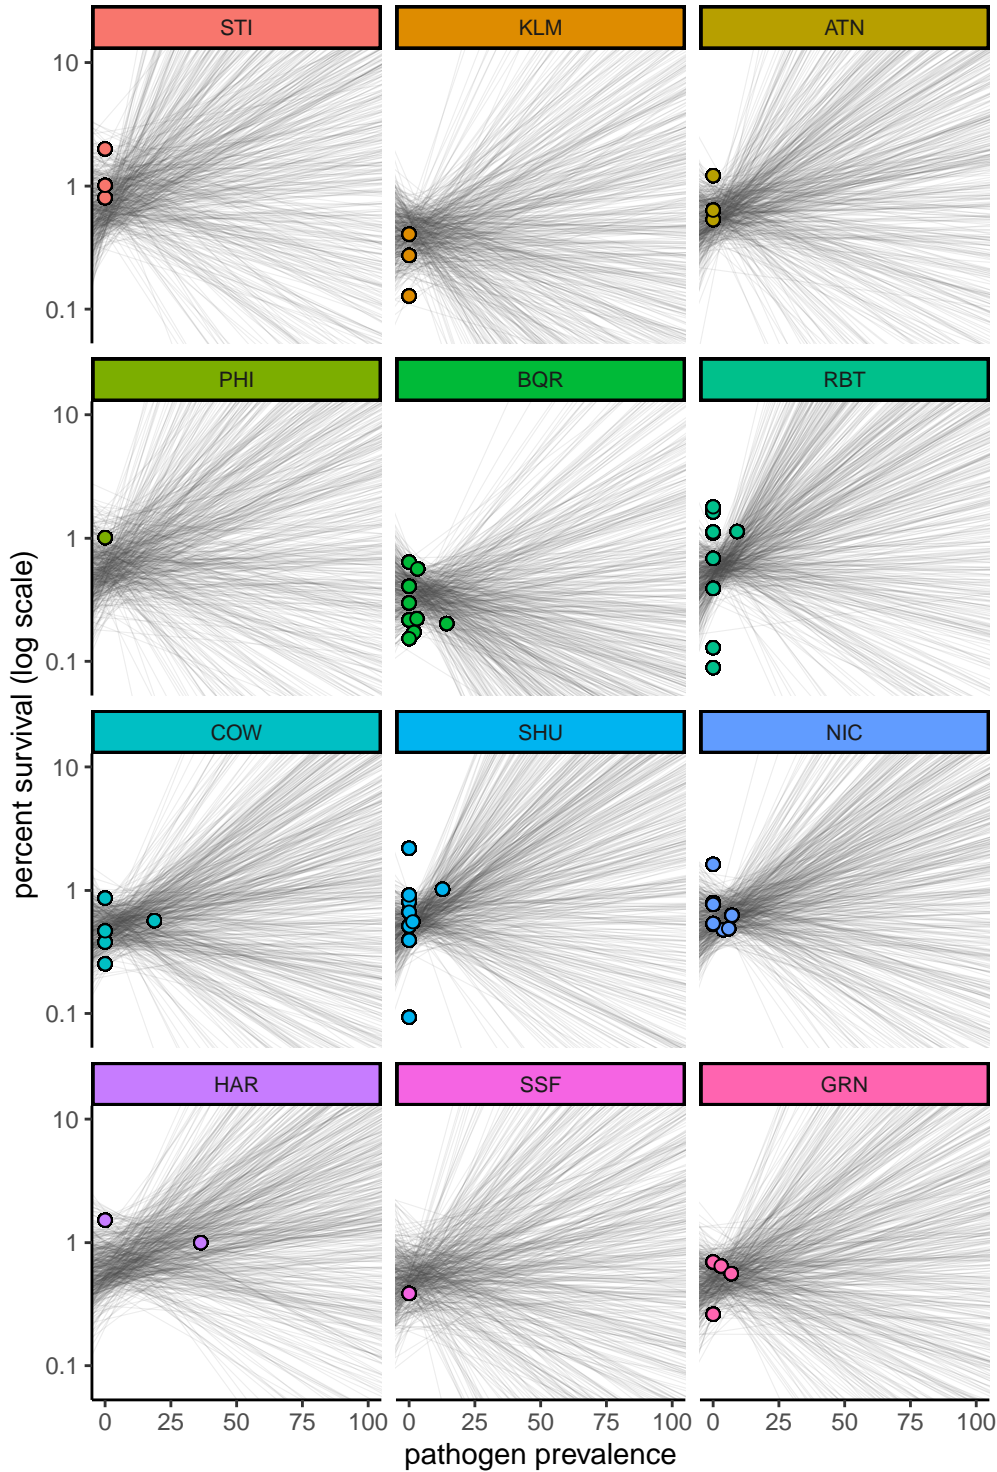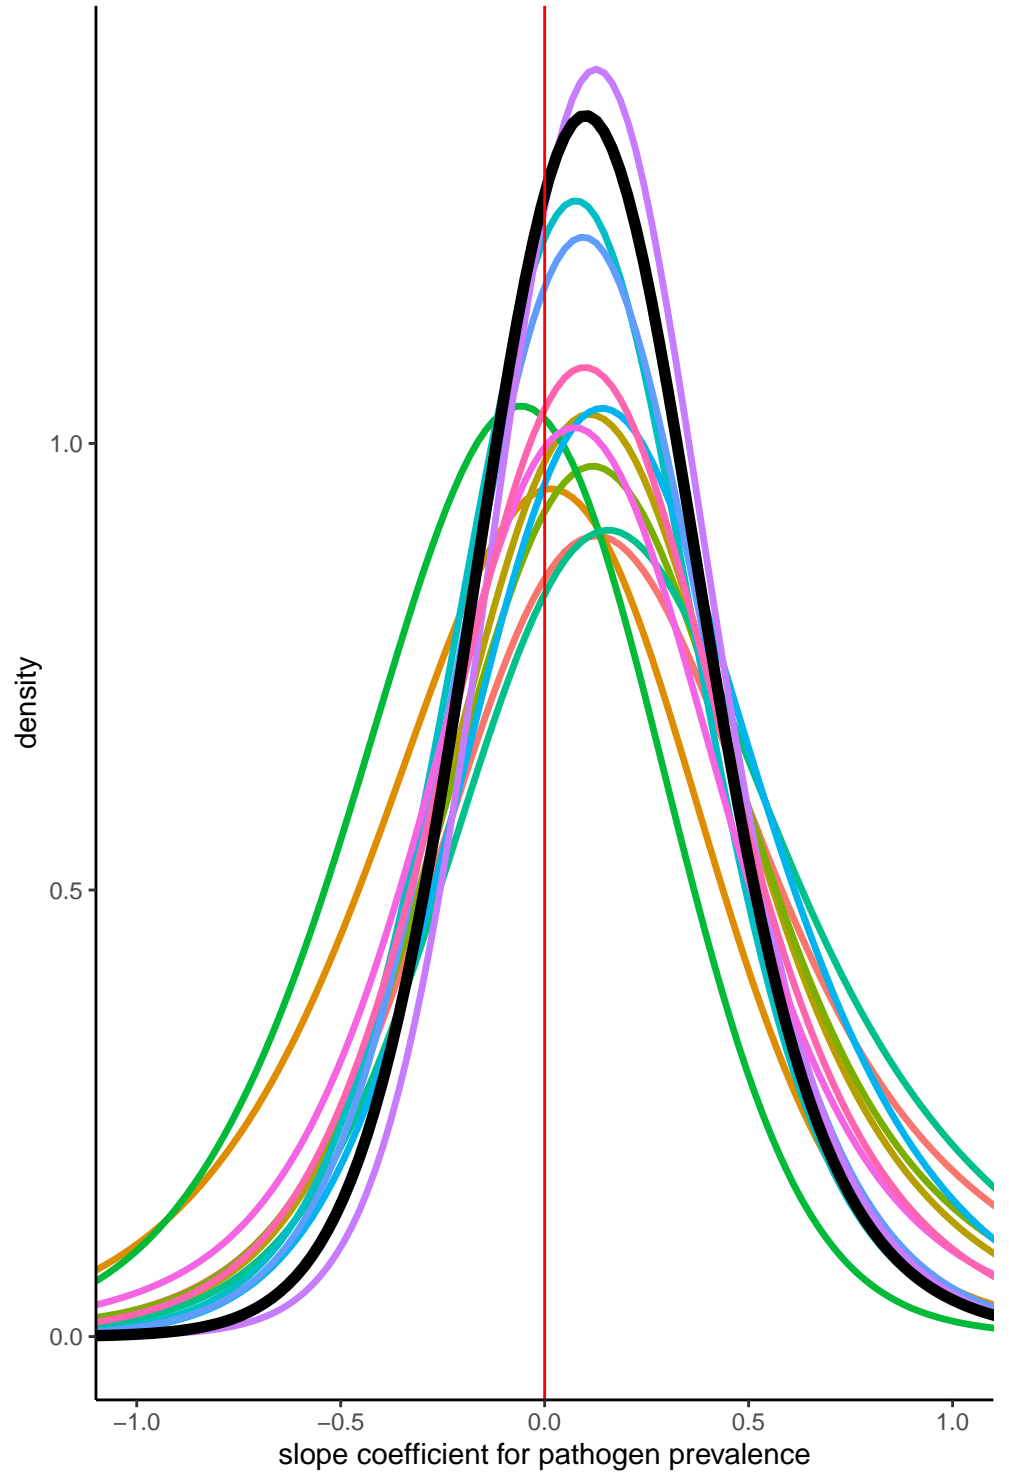



Piscine Orthoreovirus SpSu

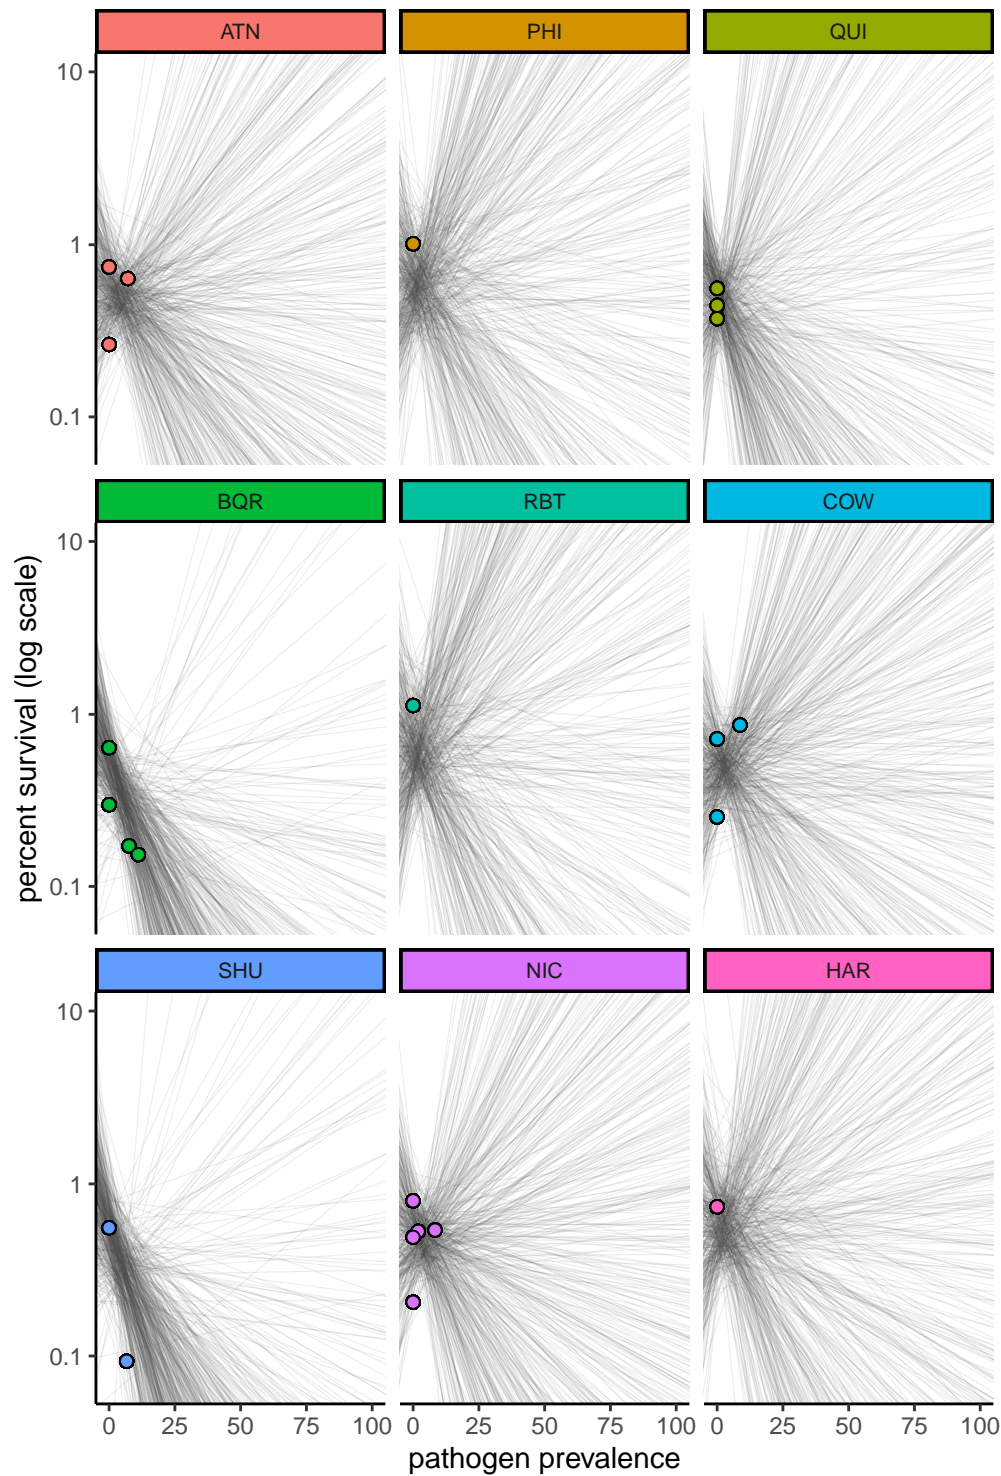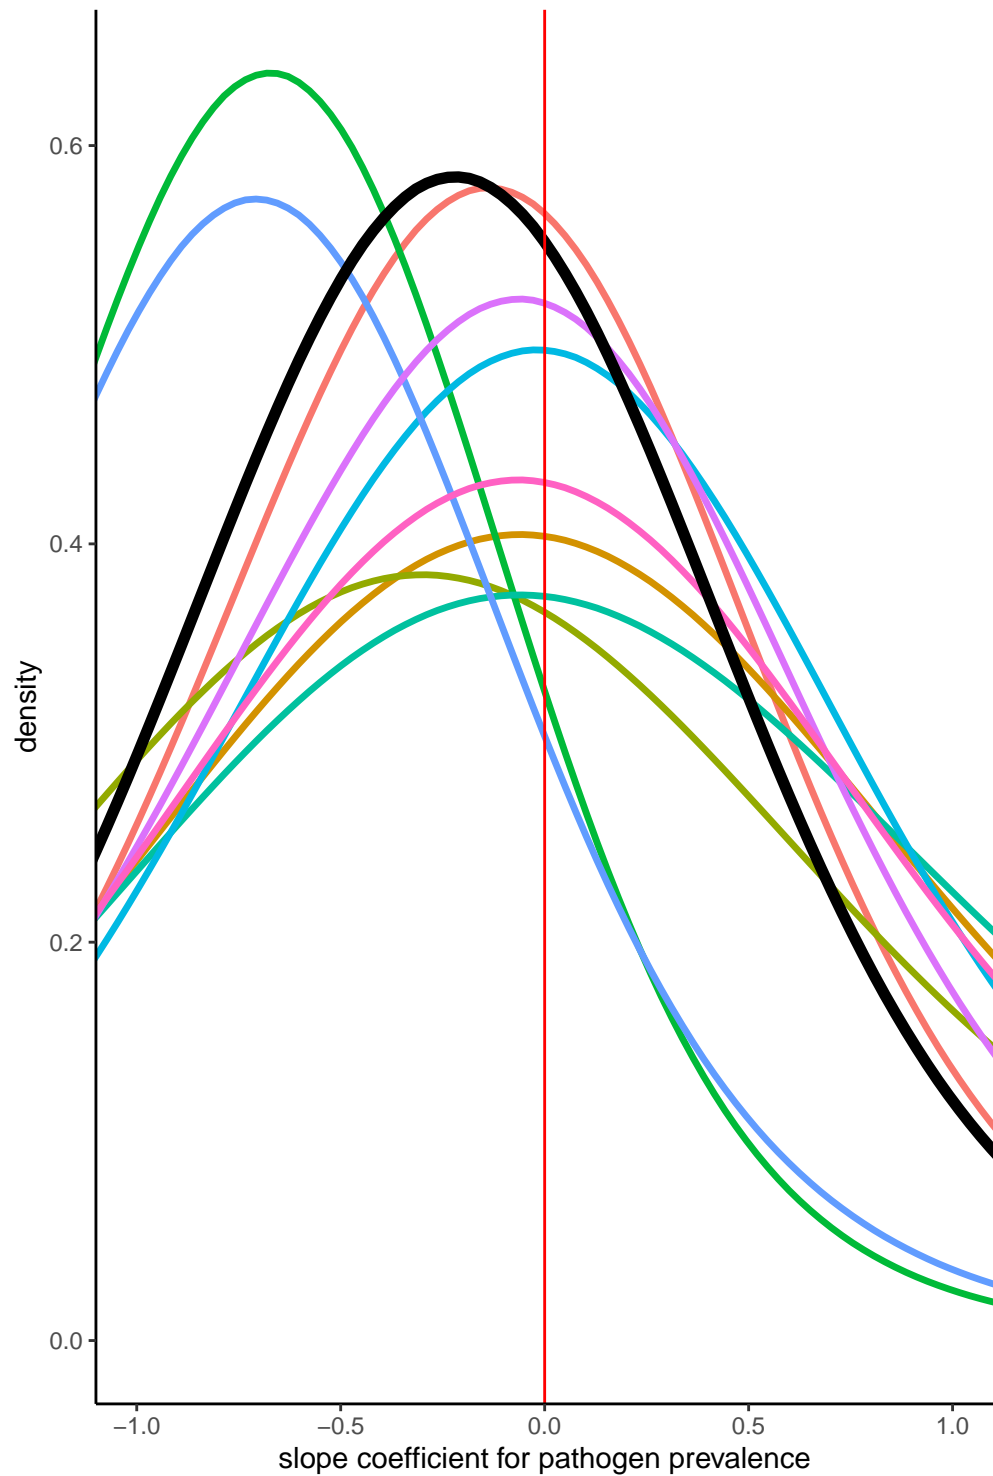

Piscine Orthoreovirus FaWi

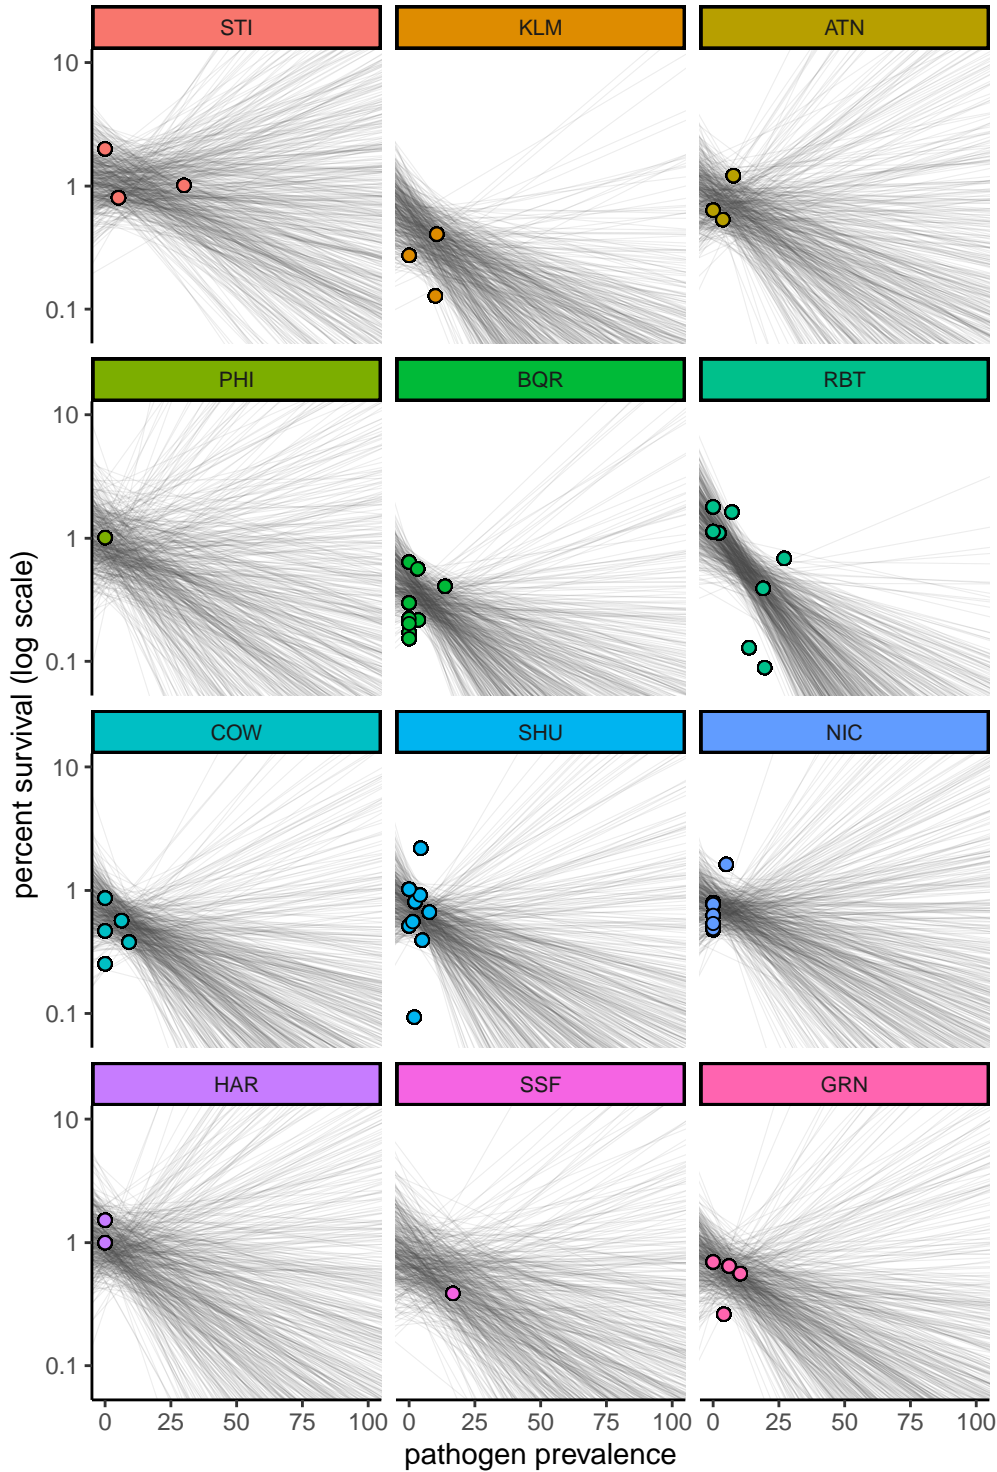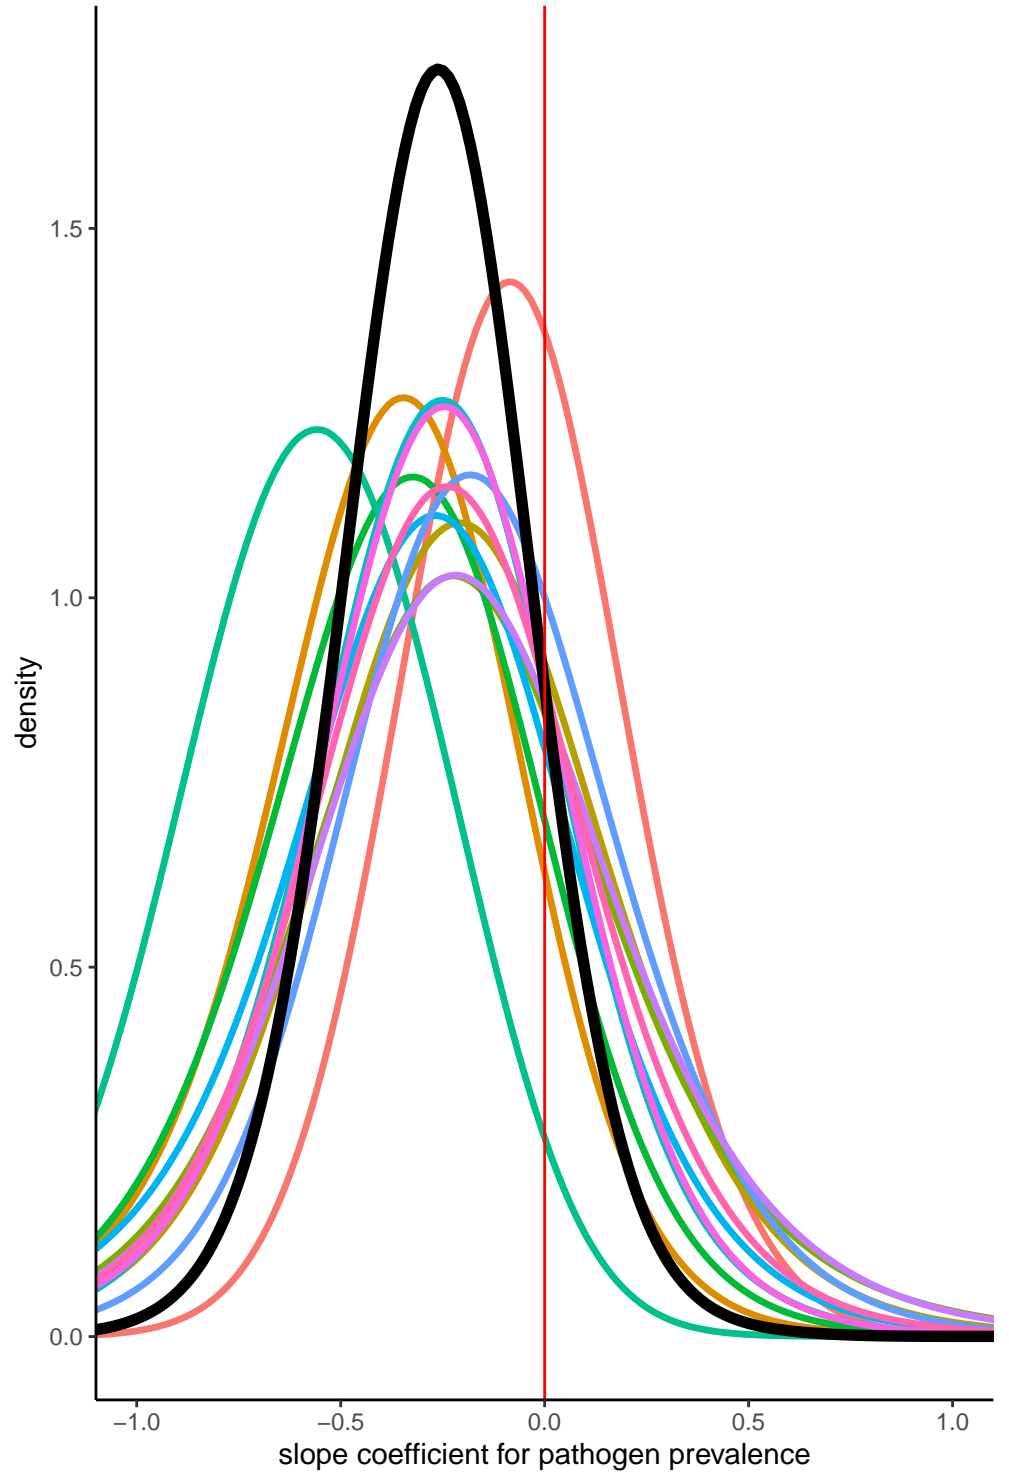

Renibacterium salmoninarum SpSu

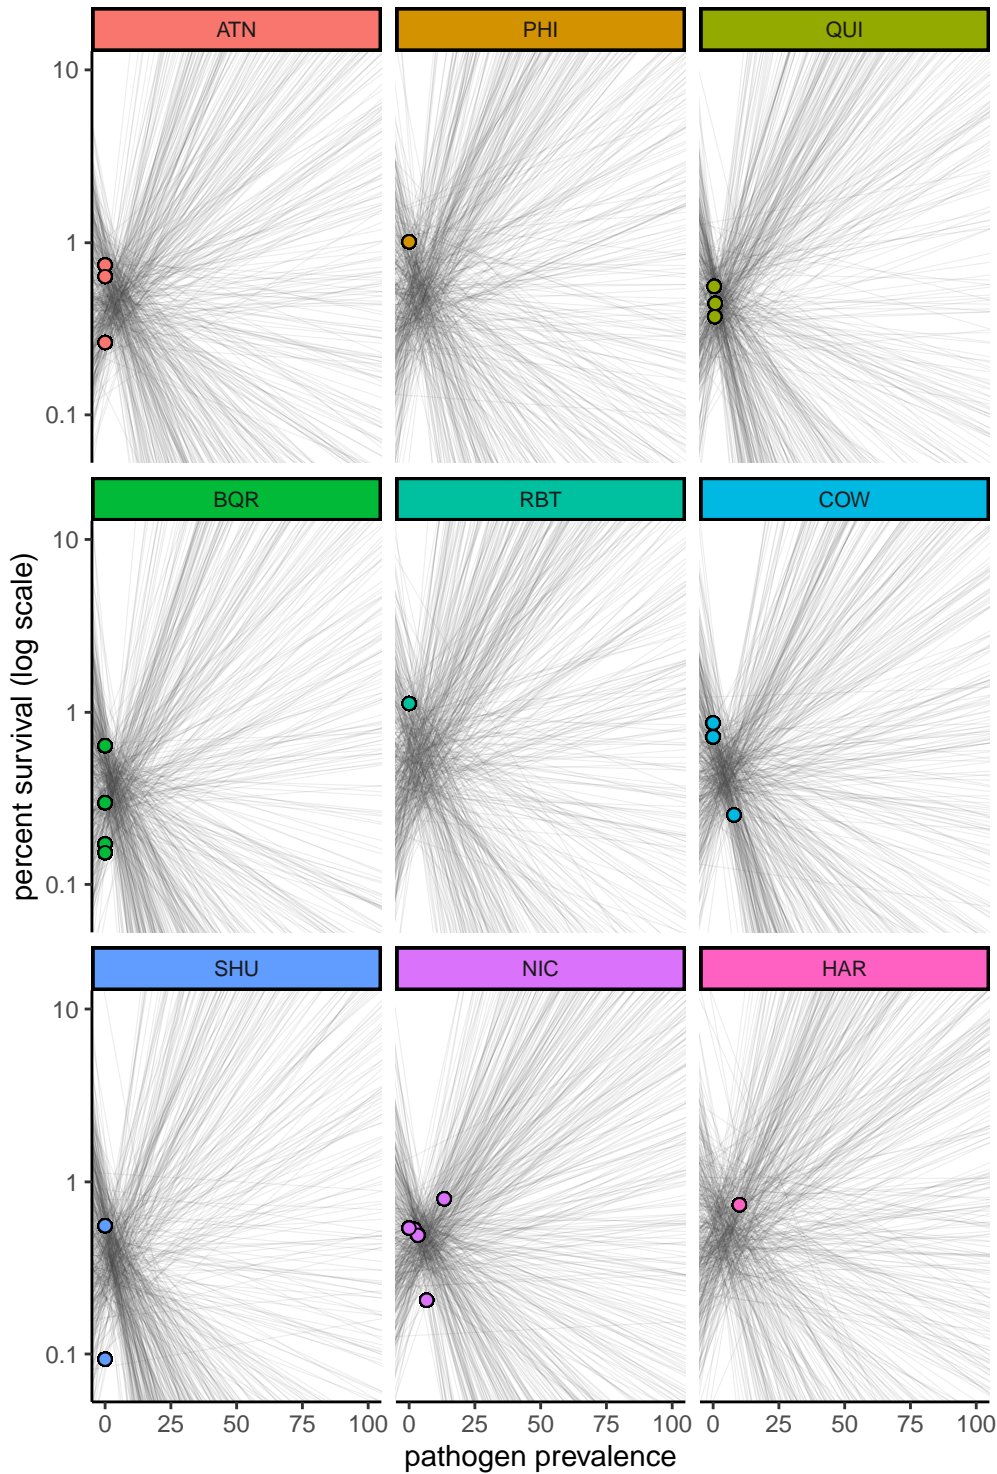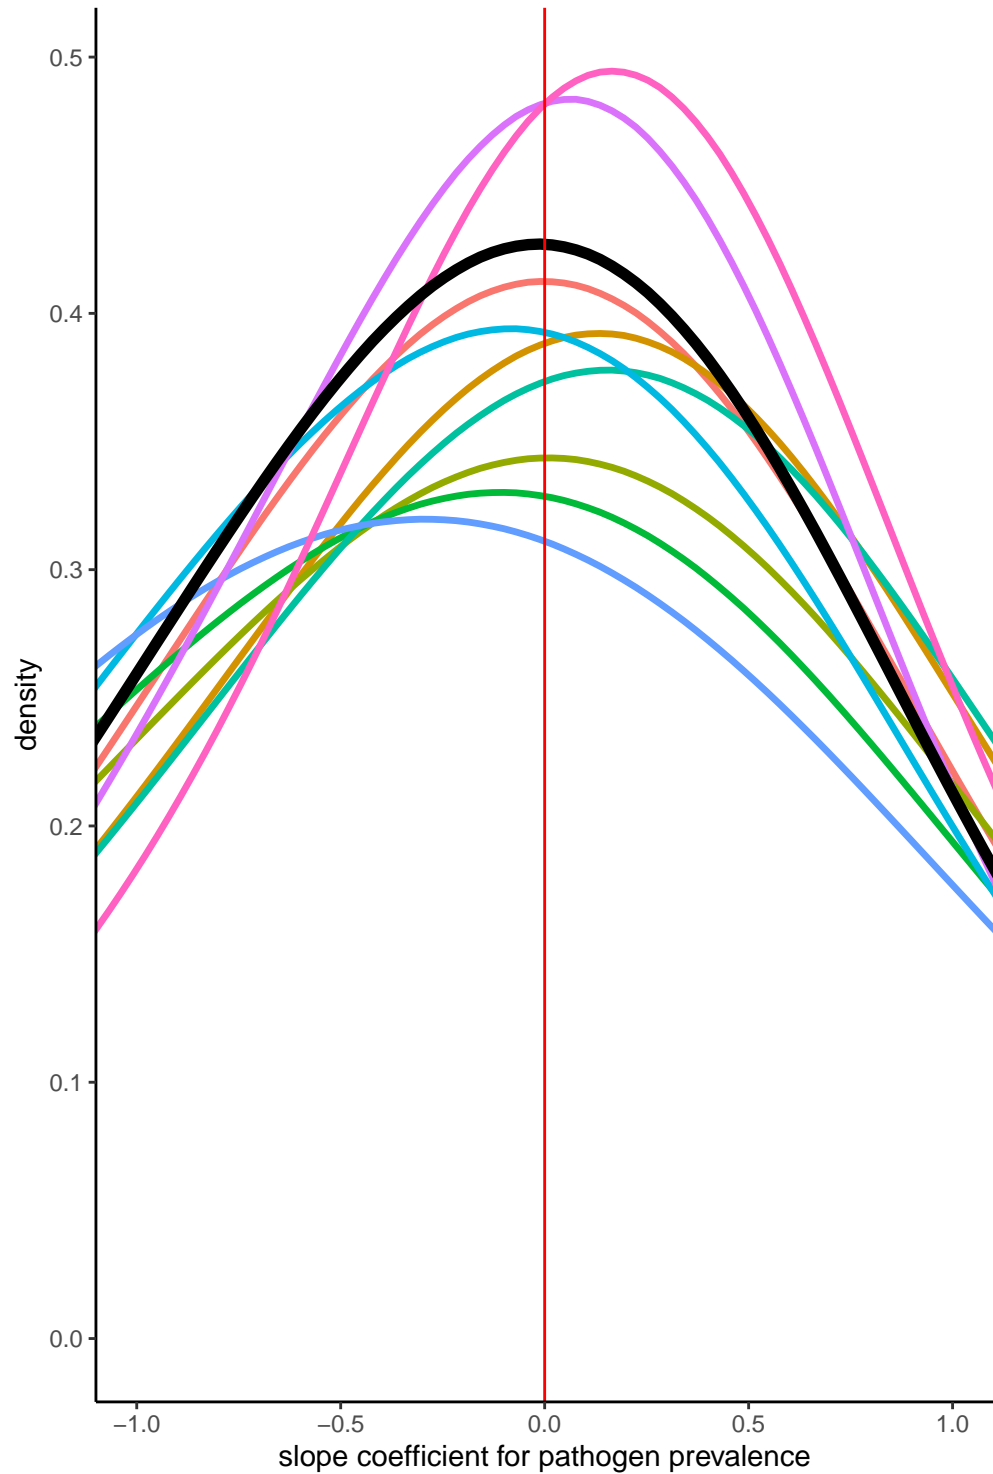

Renibacterium salmoninarum FaWi

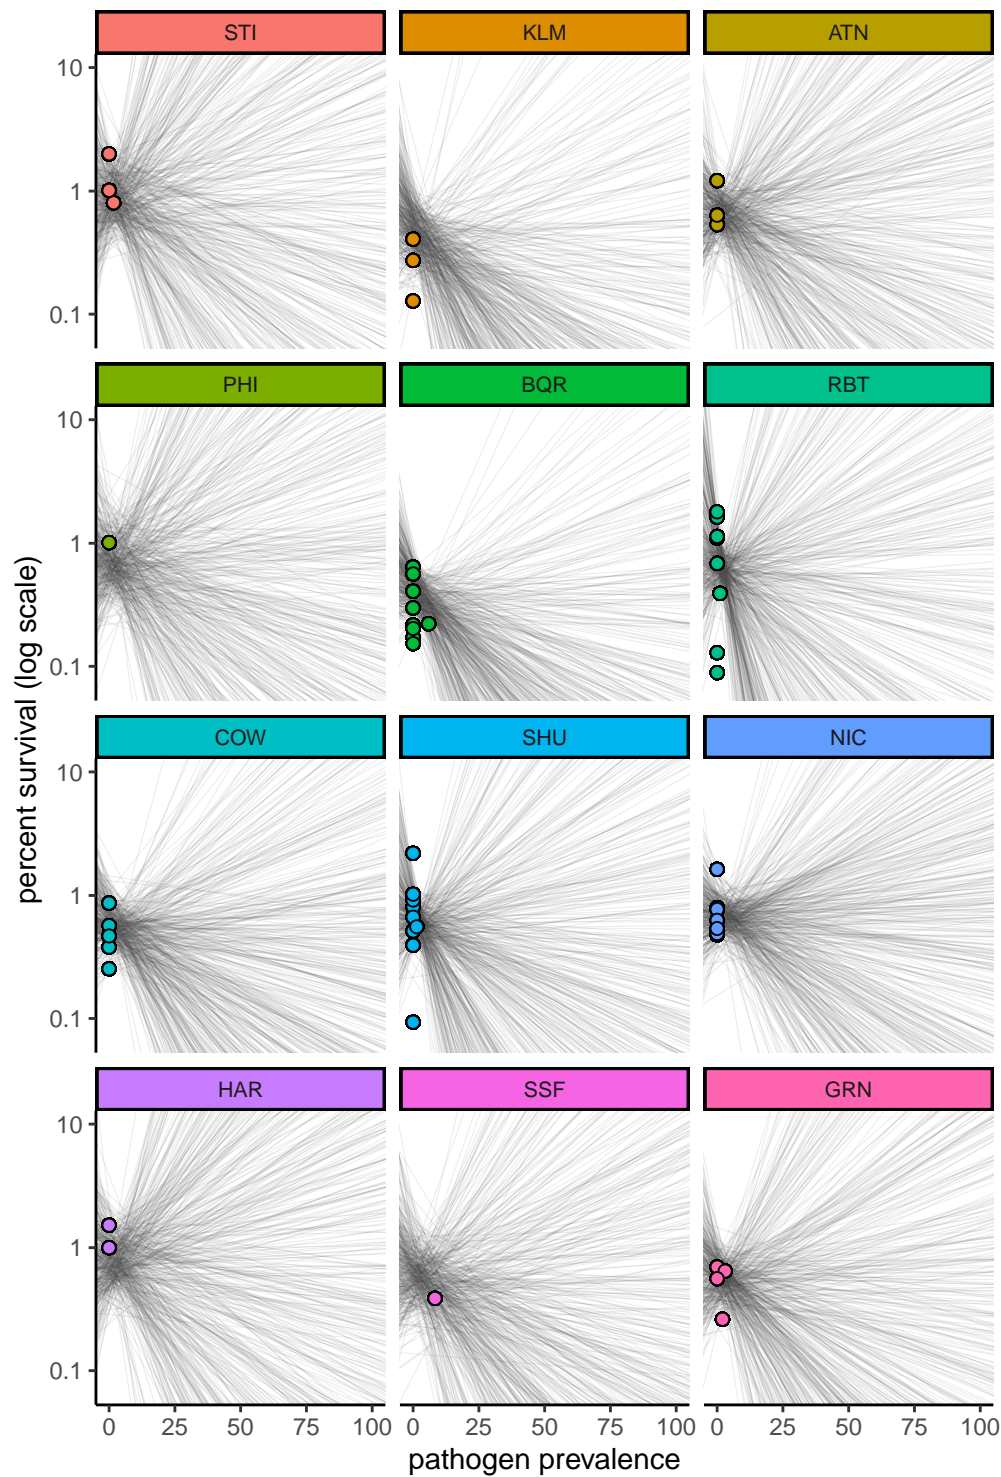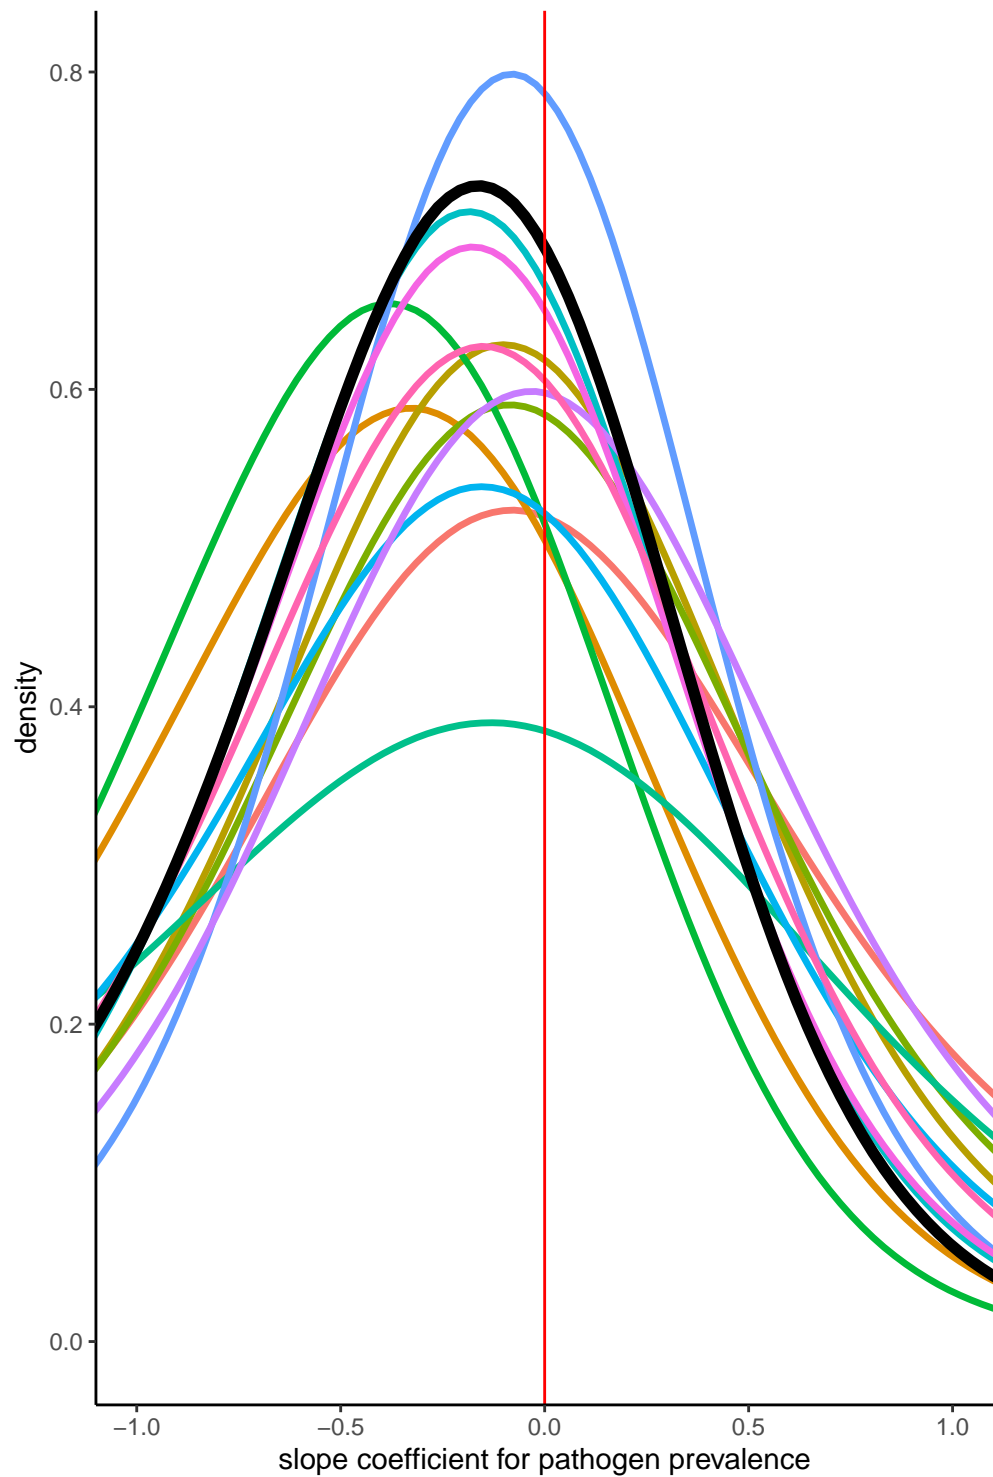

Rickettsia-like Organism SpSu

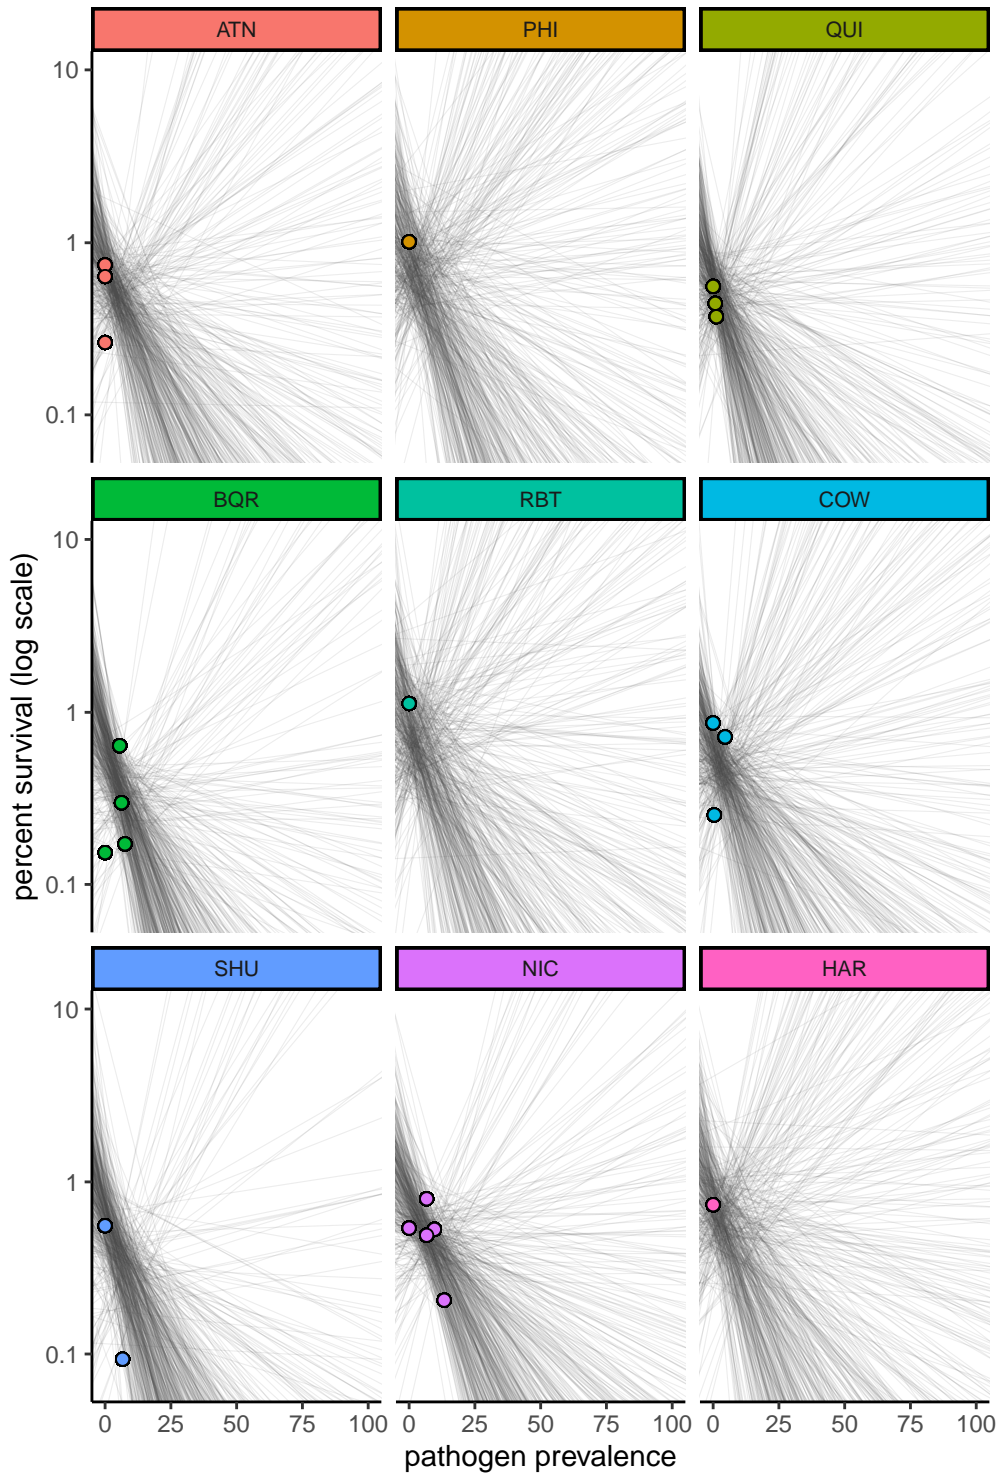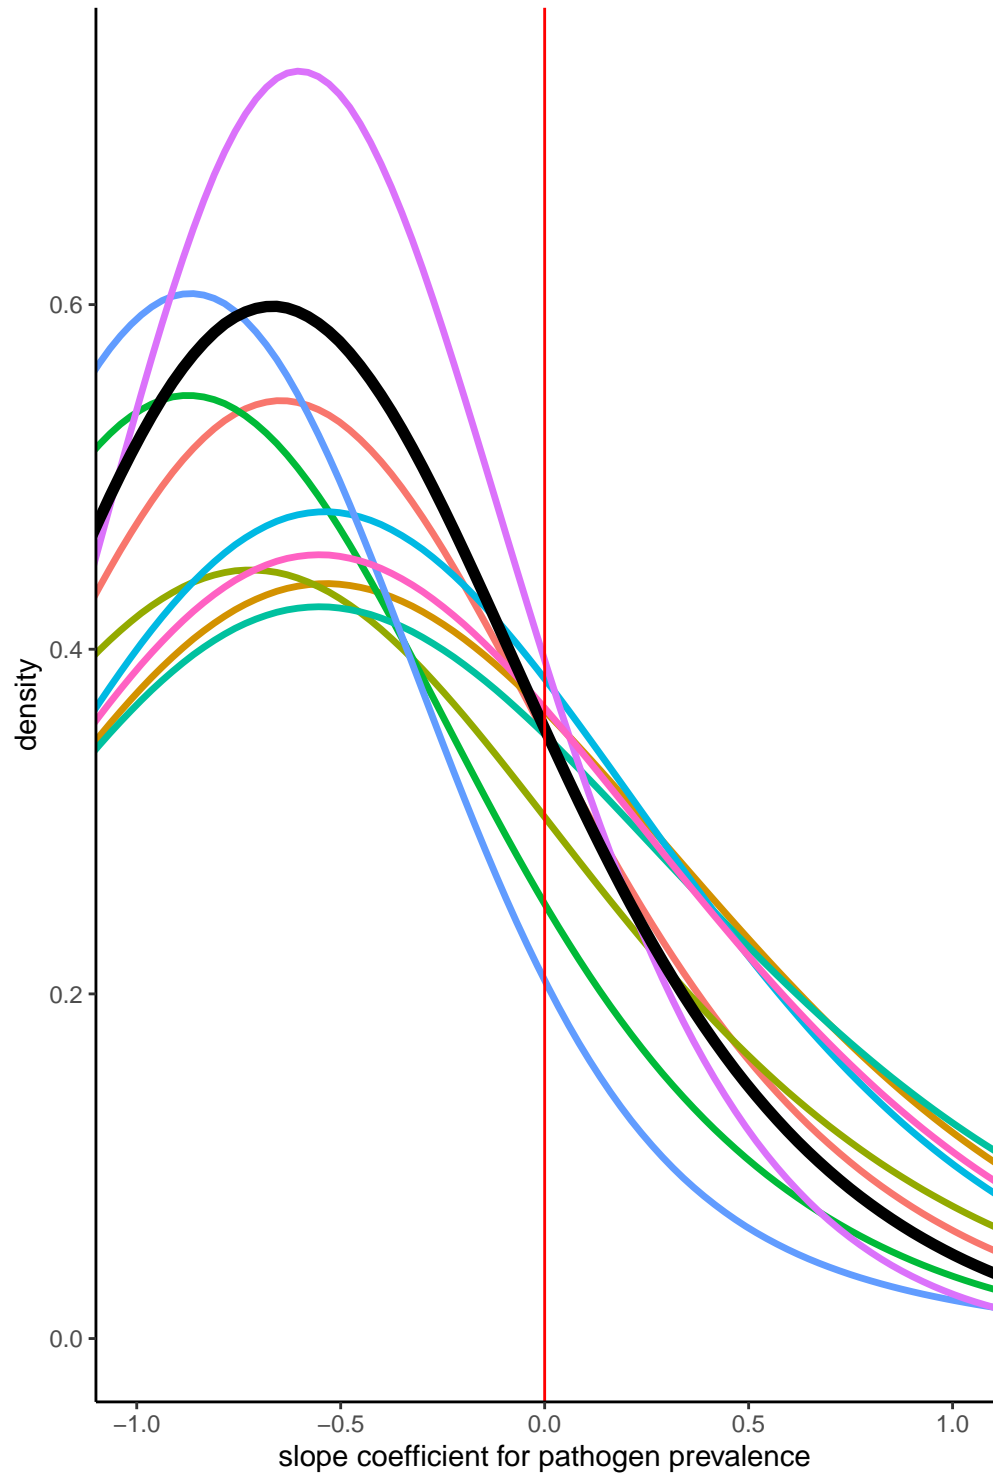

Rickettsia-like Organism FaWi

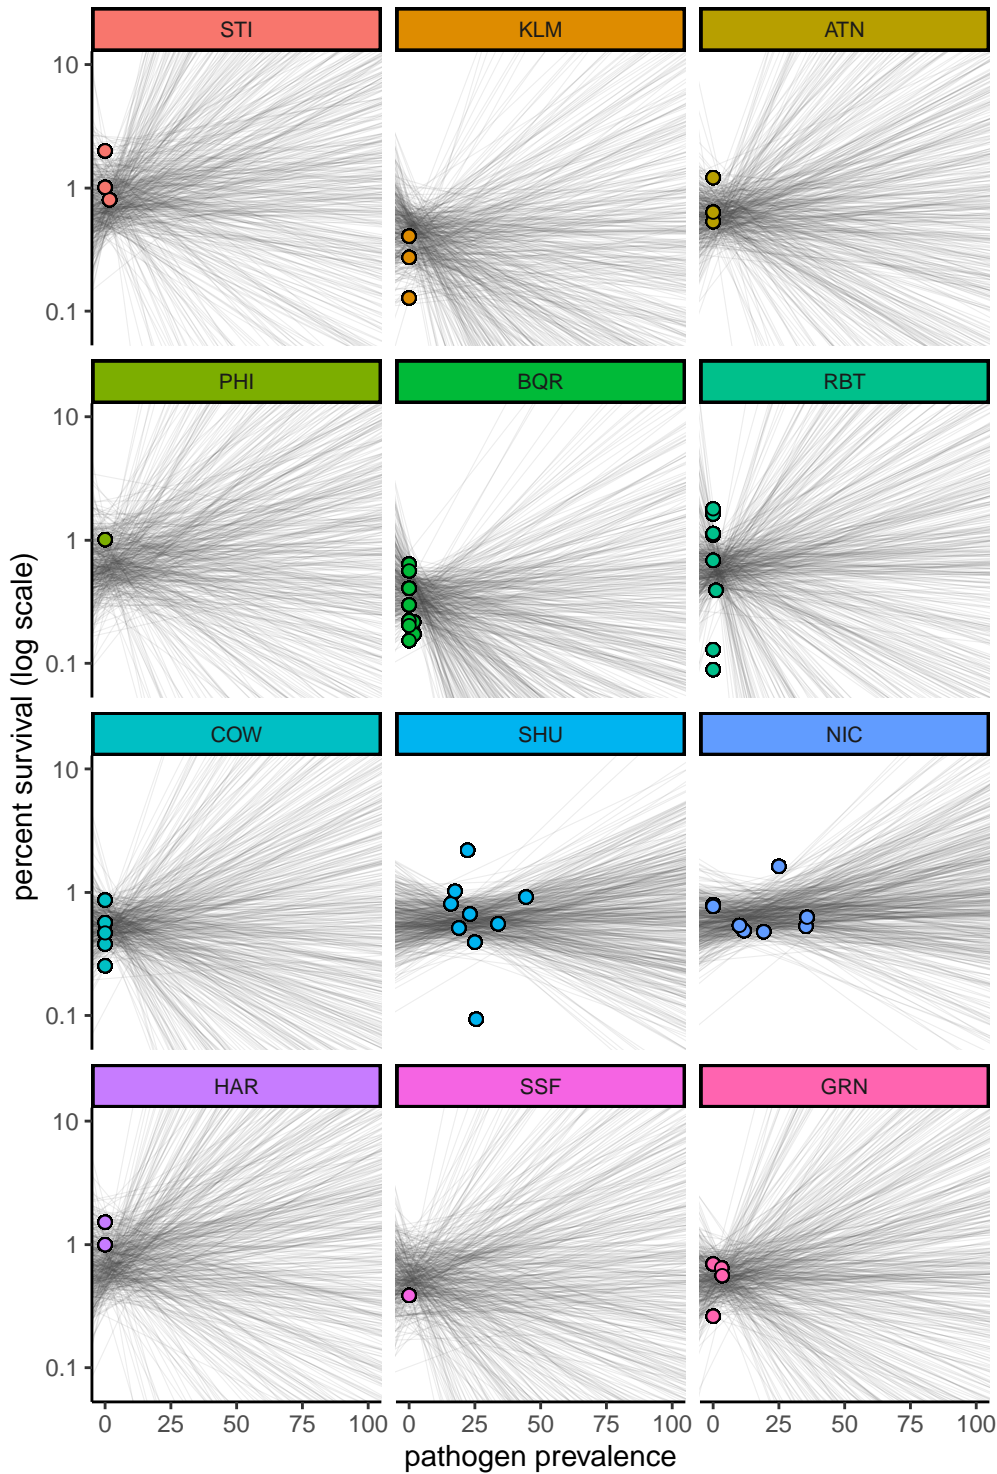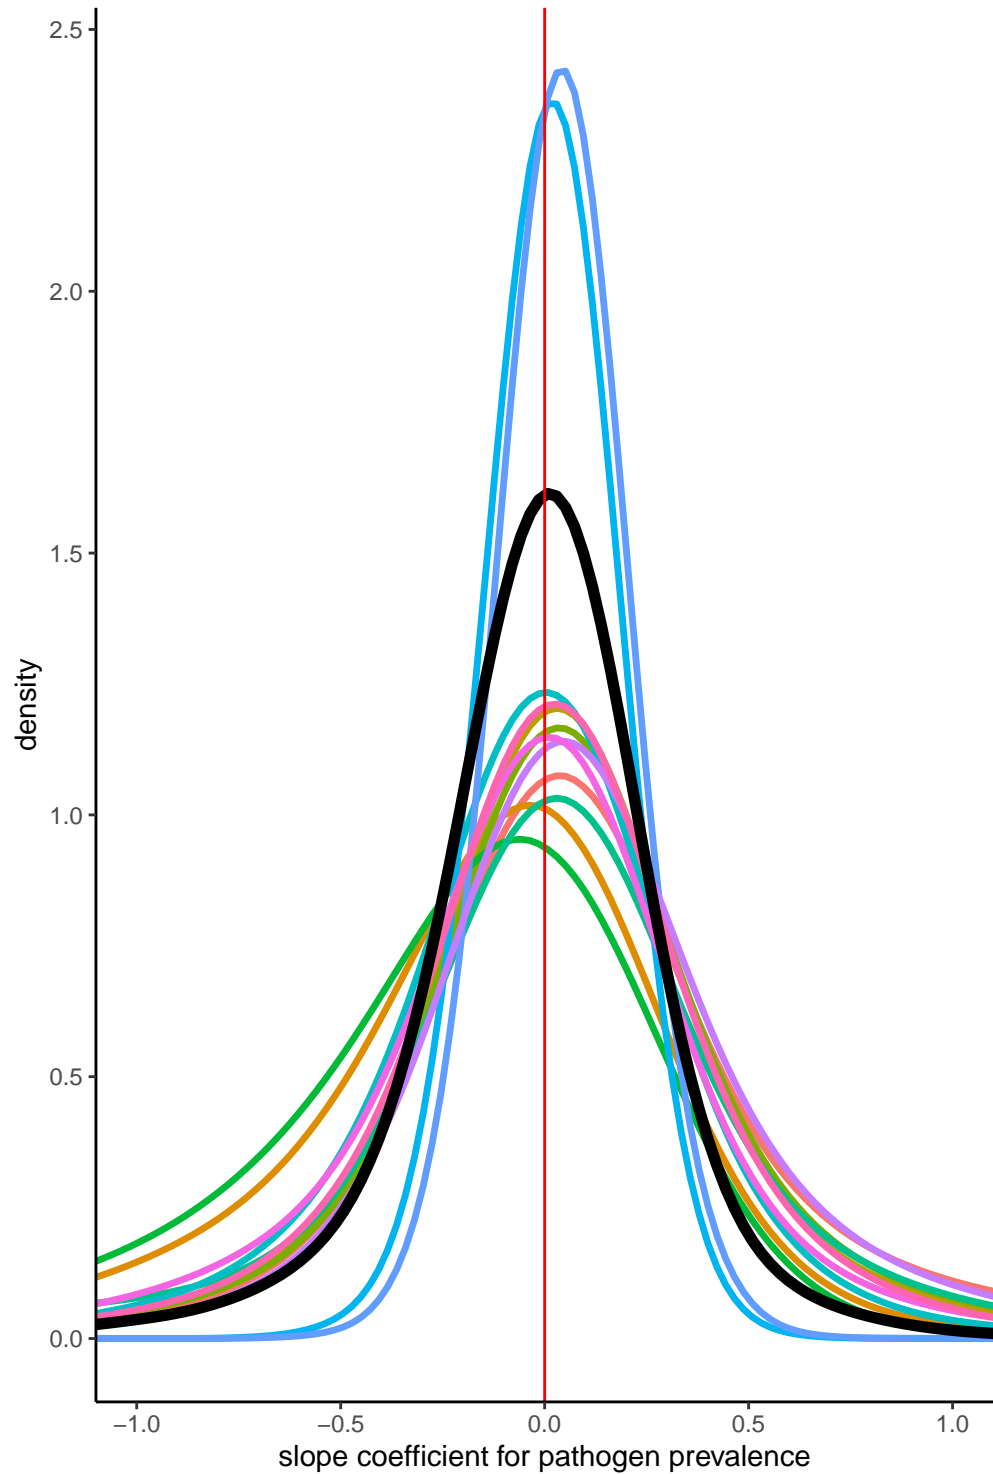

Candidatus Syngnamydia salmonis SpSu

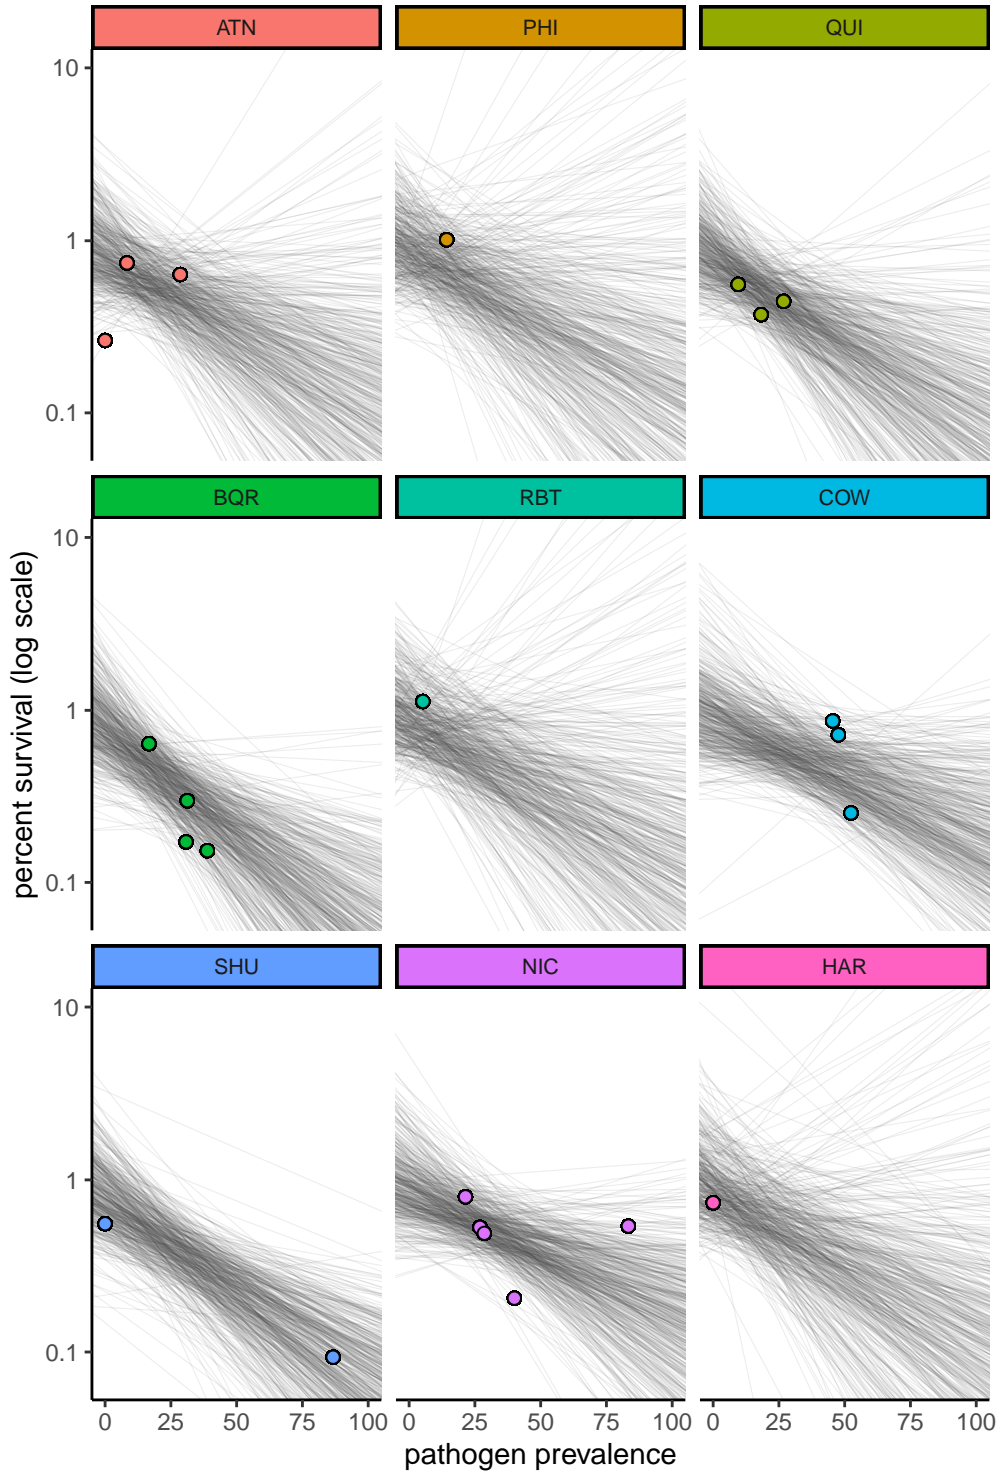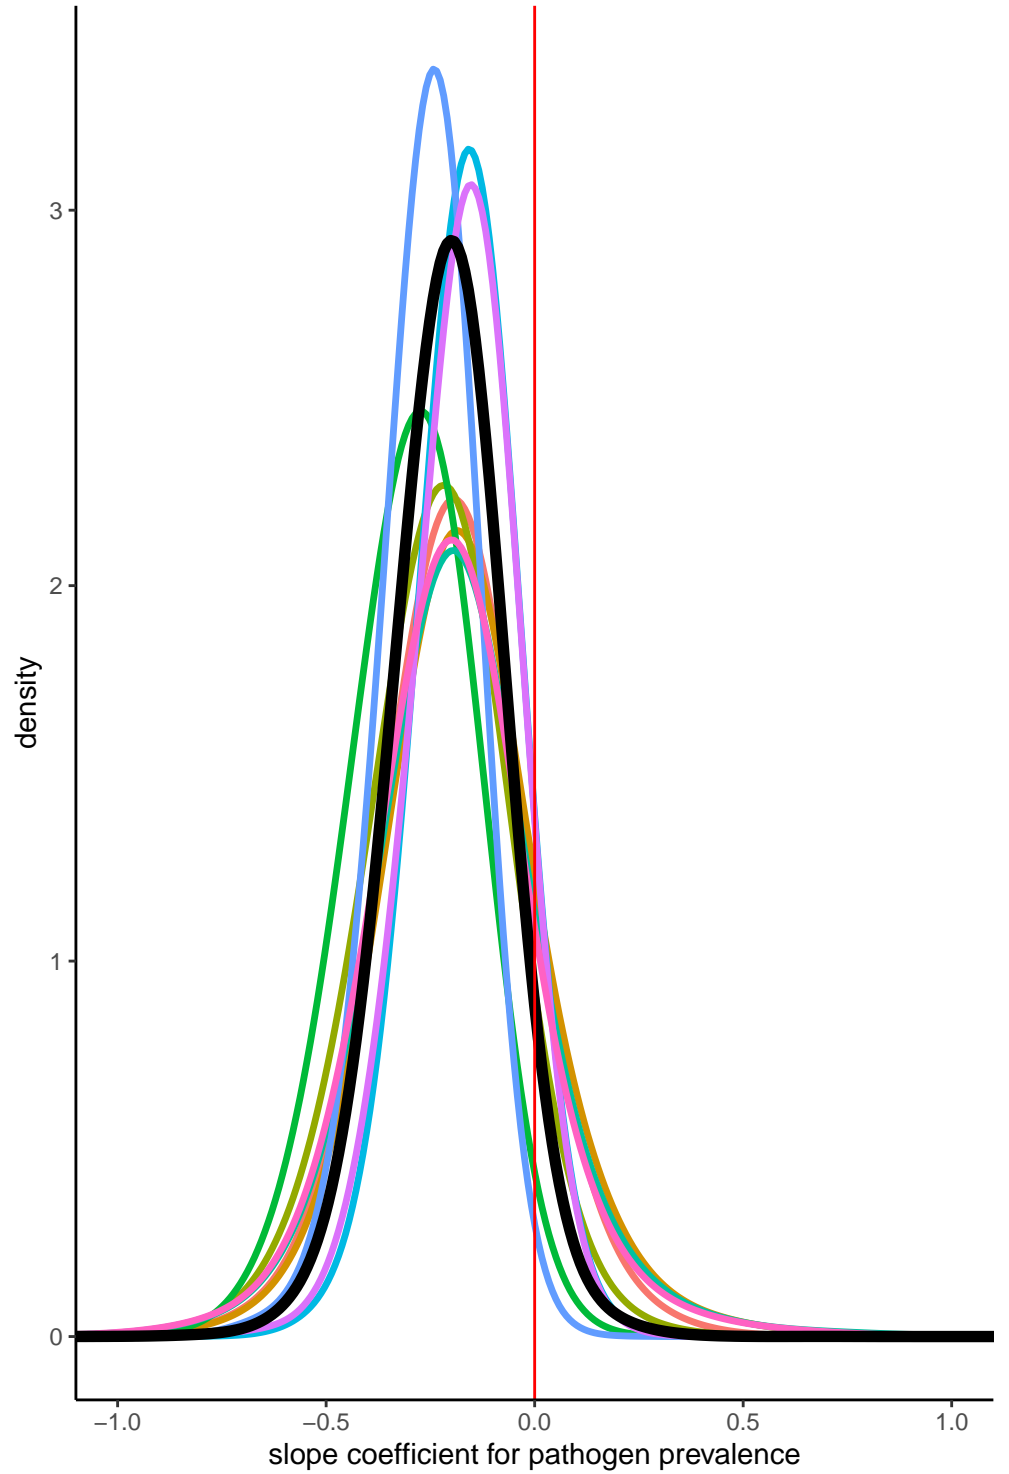

Candidatus *Syngnamydia salmonis* FaWi

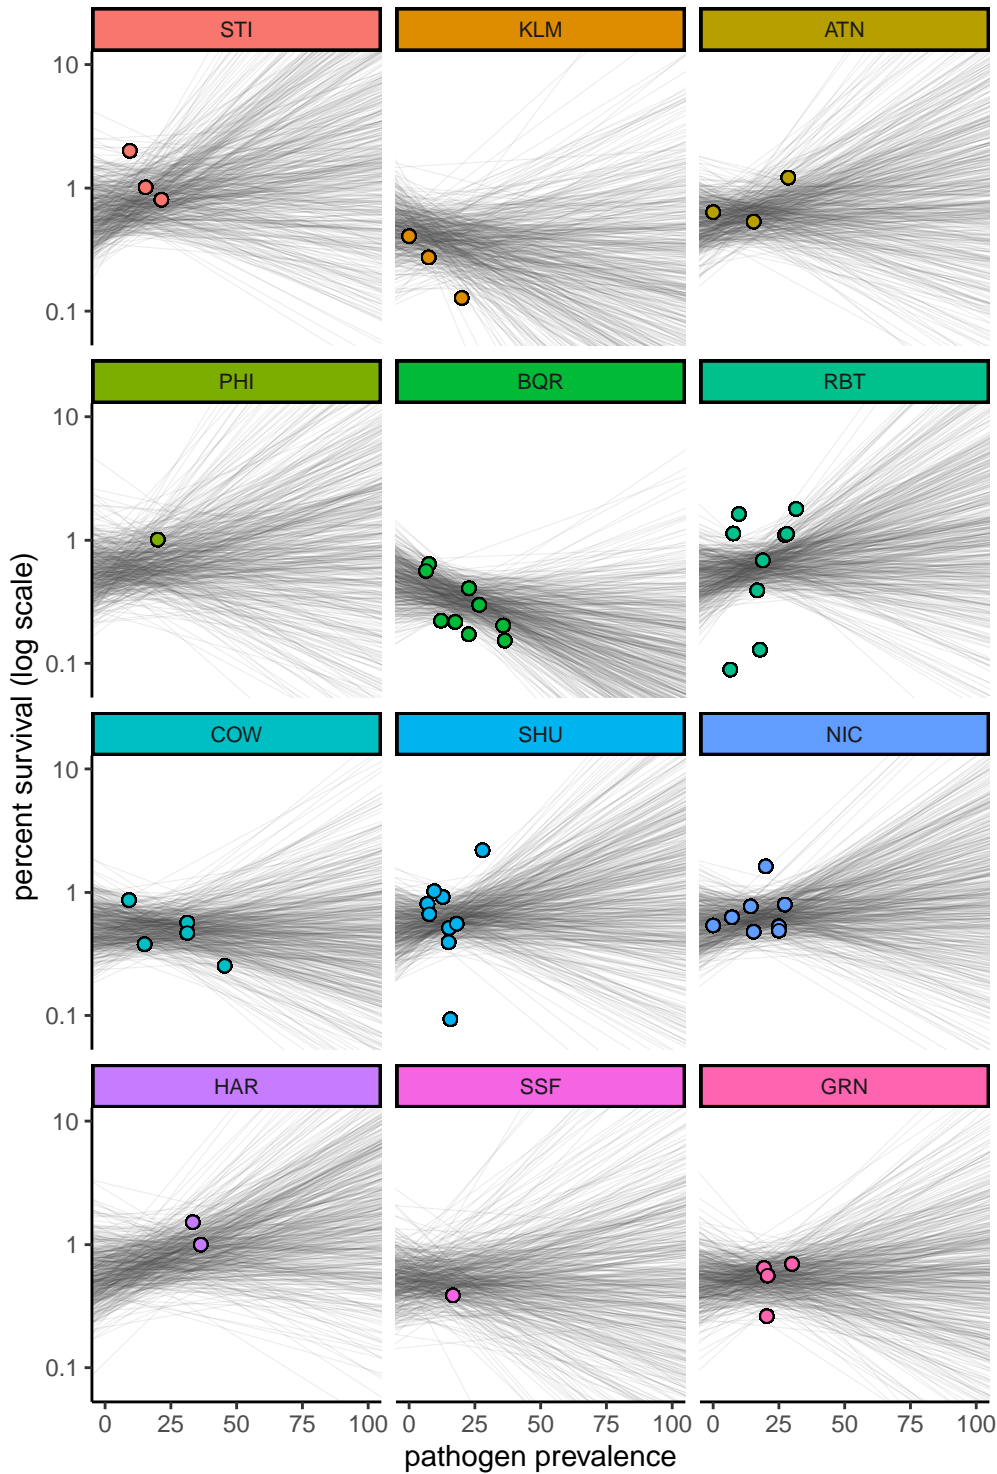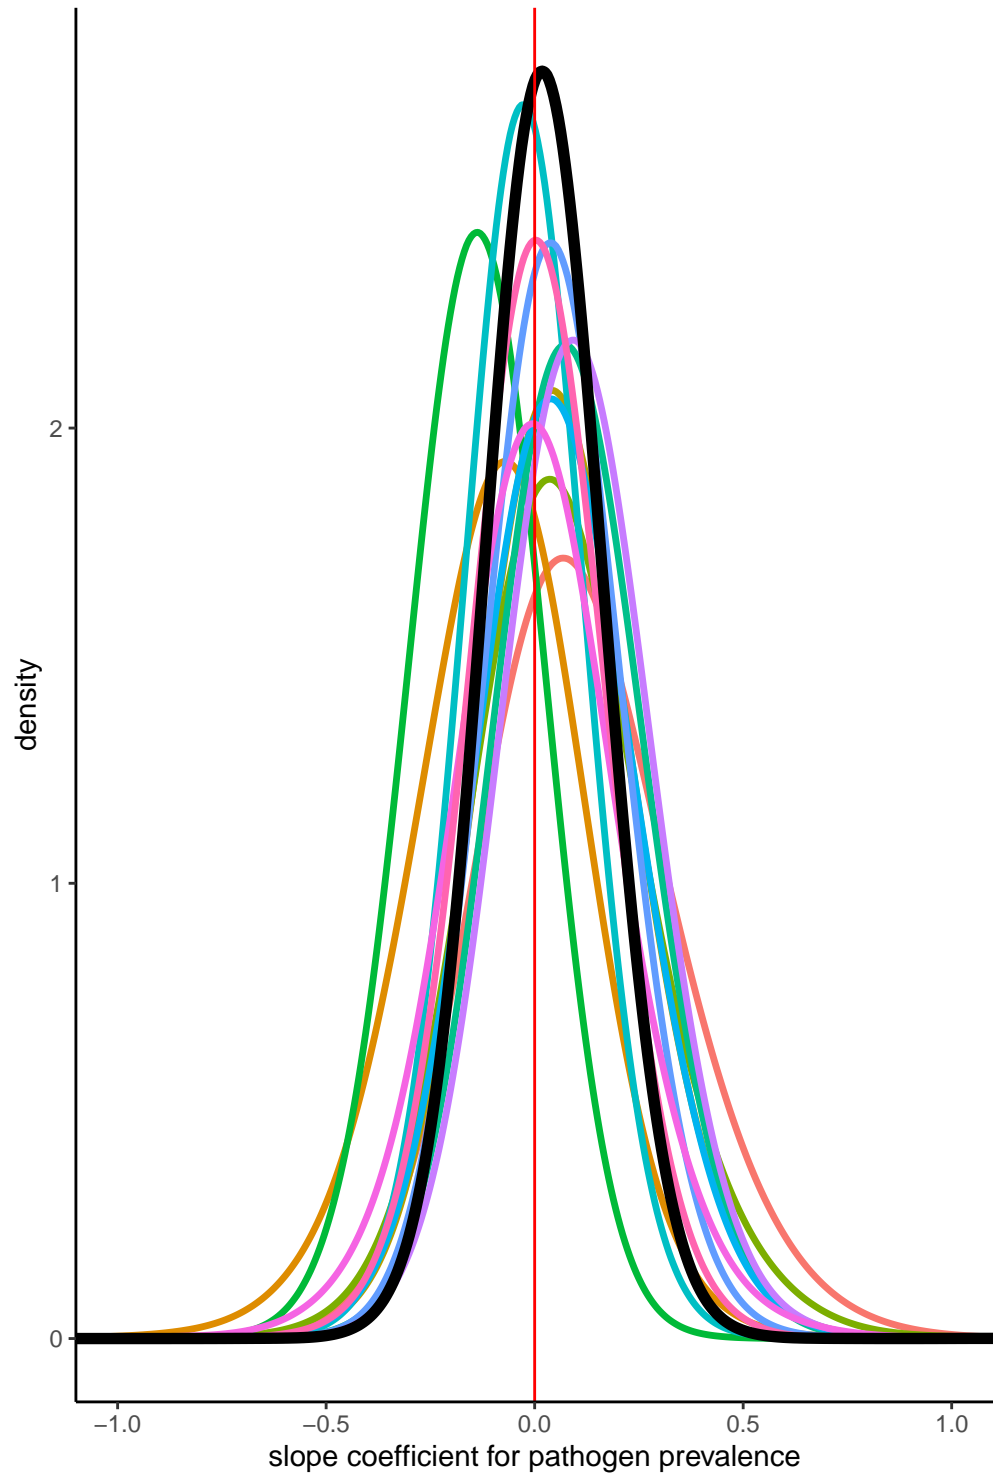



*Sphaerothecum destruens* SpSu

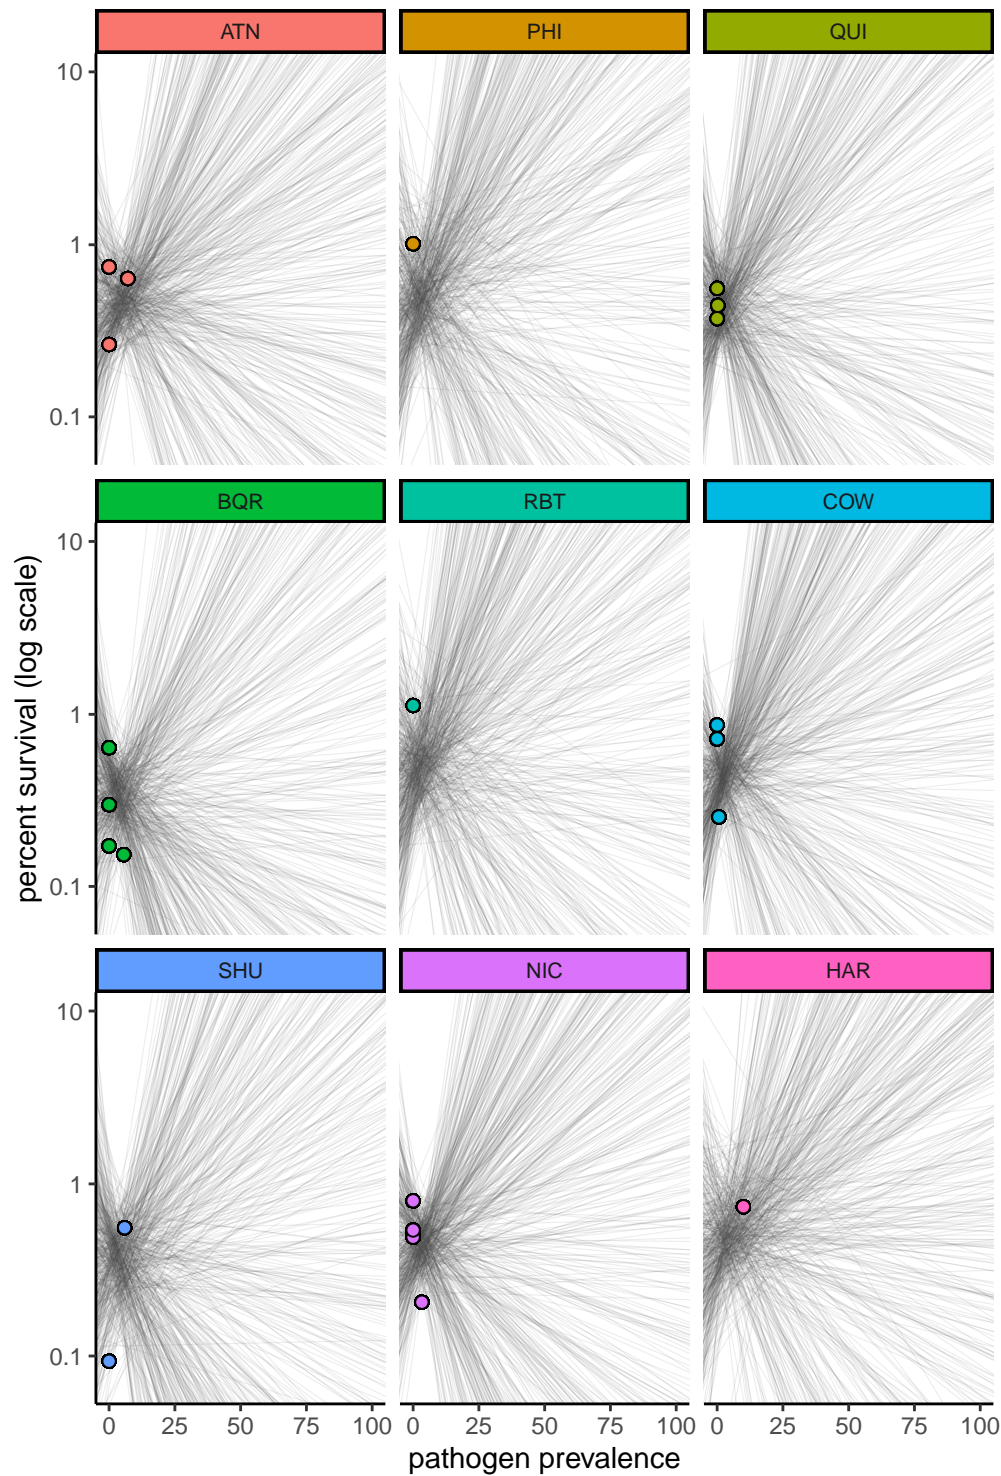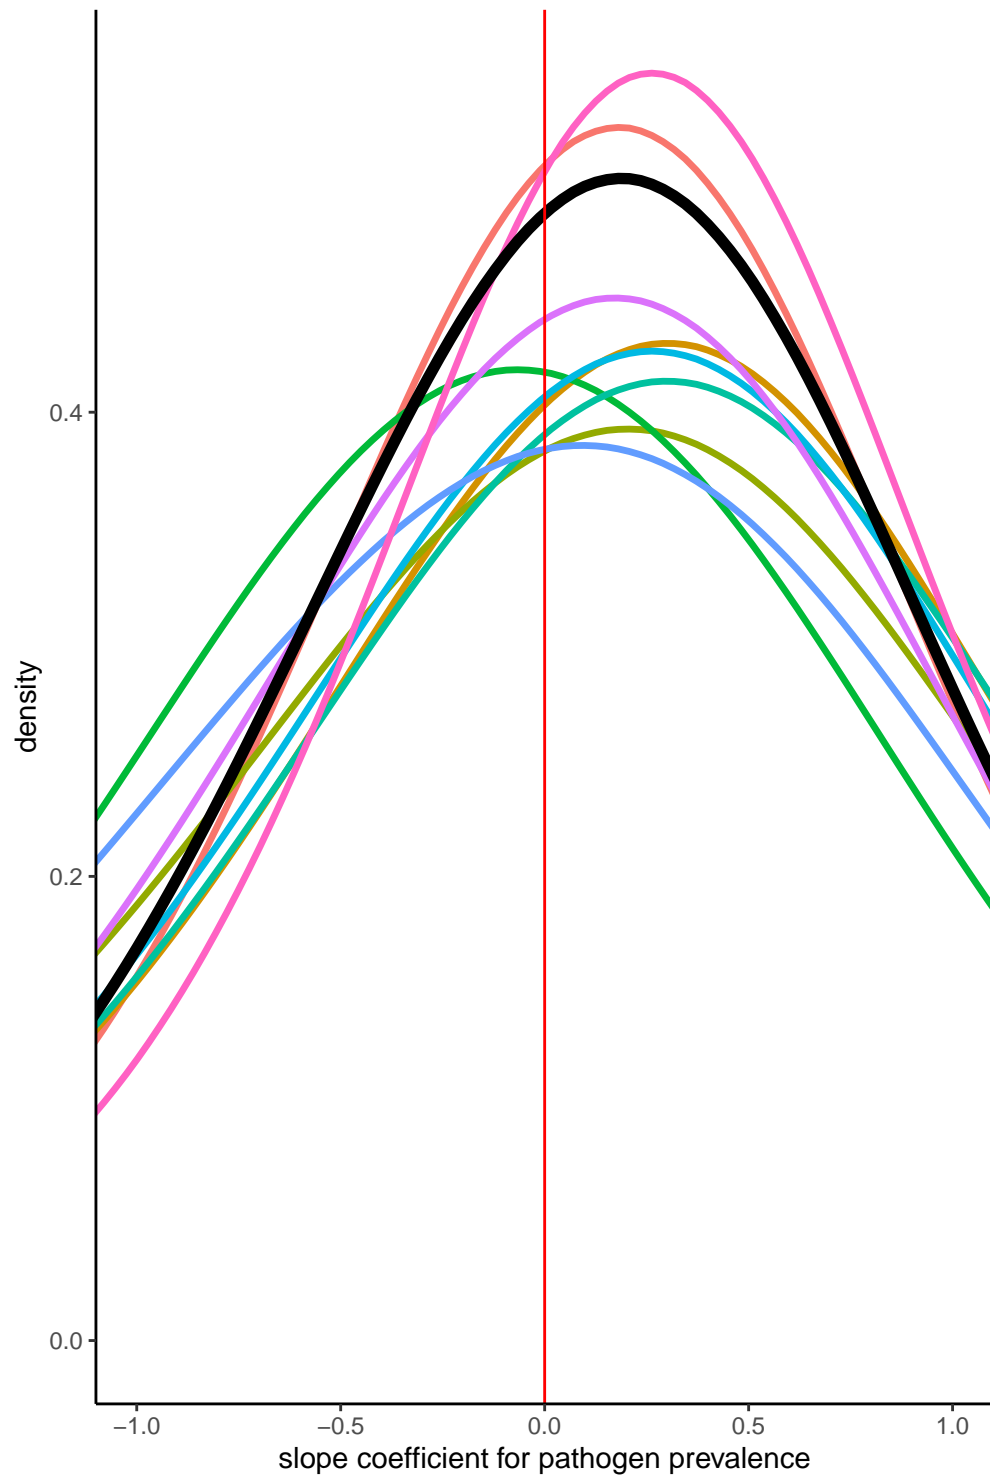

*Sphaerothecum destruens* FaWi

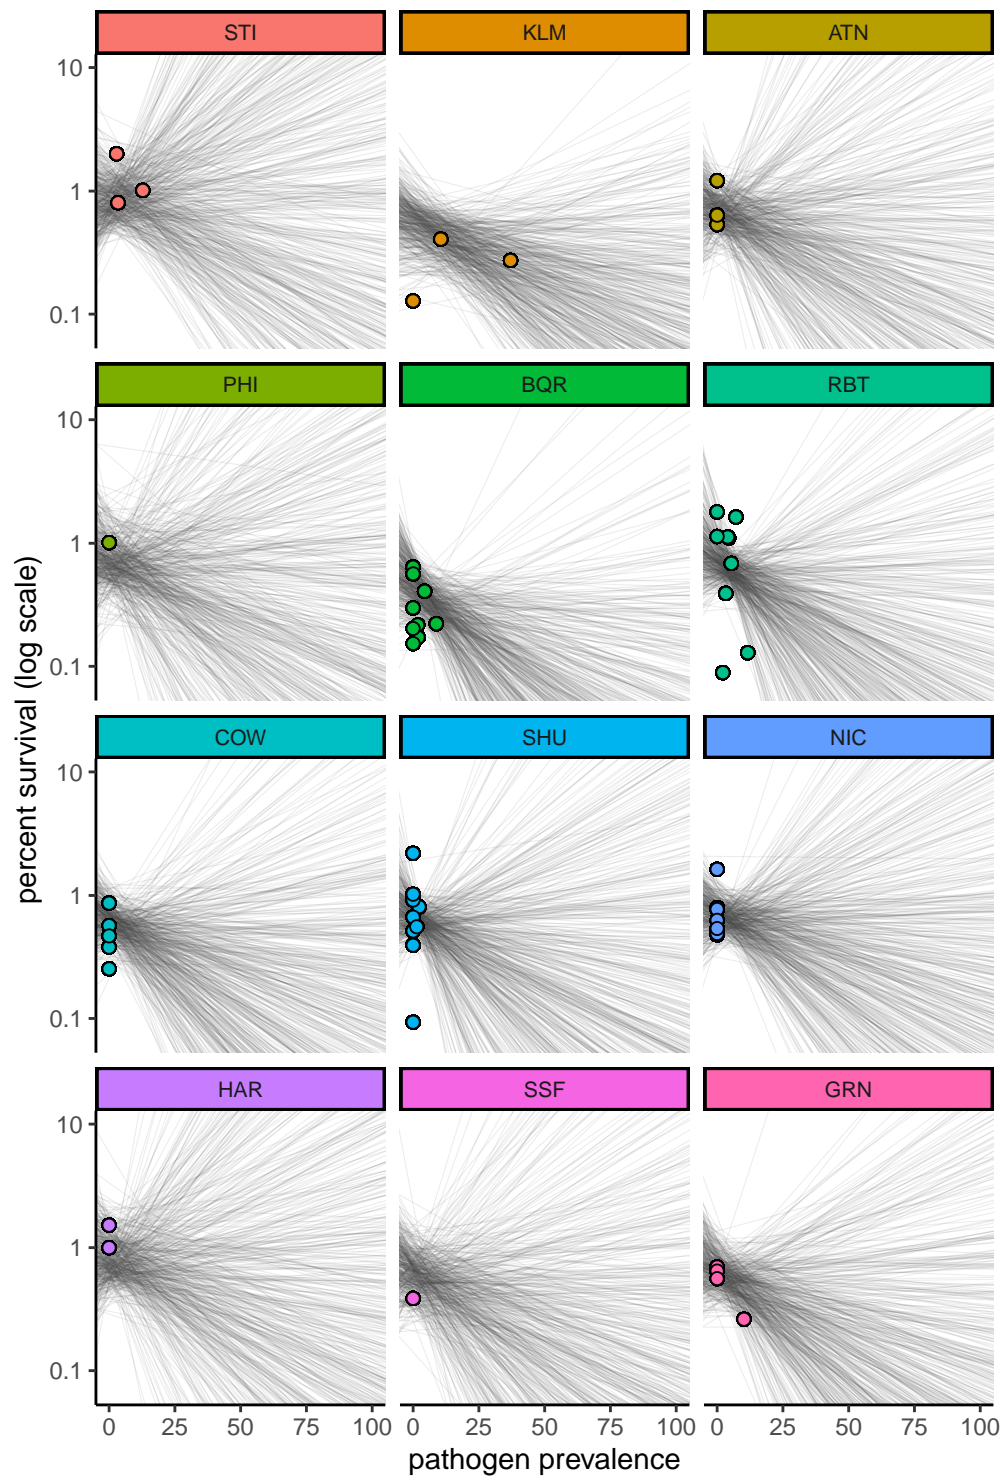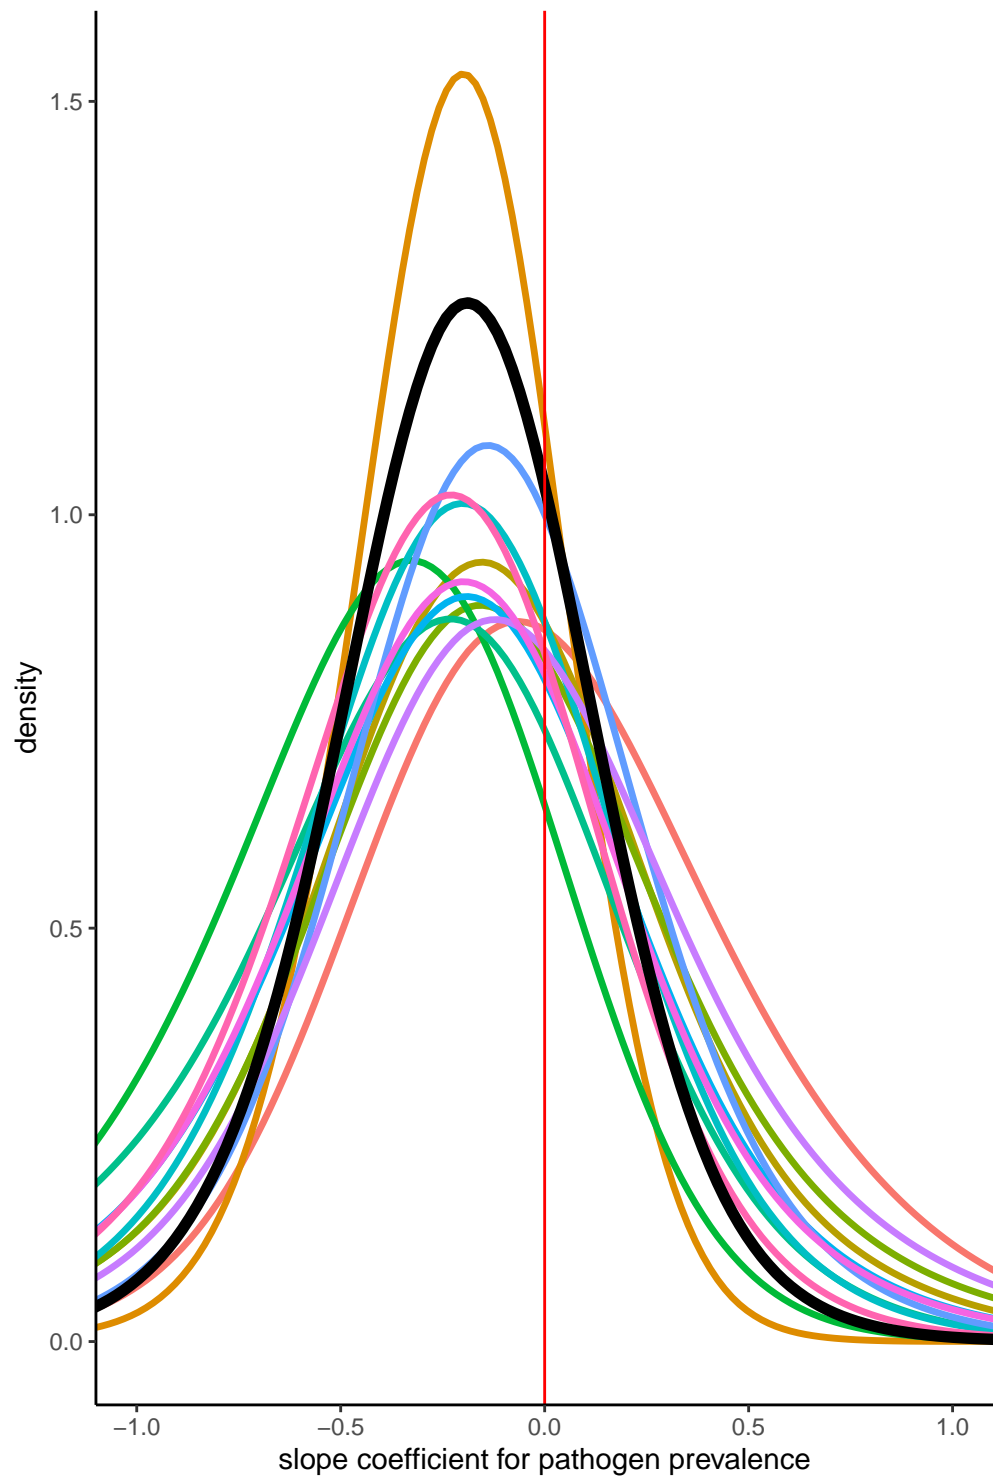

*Tetracapsuloides bryosalmonae* SpSu

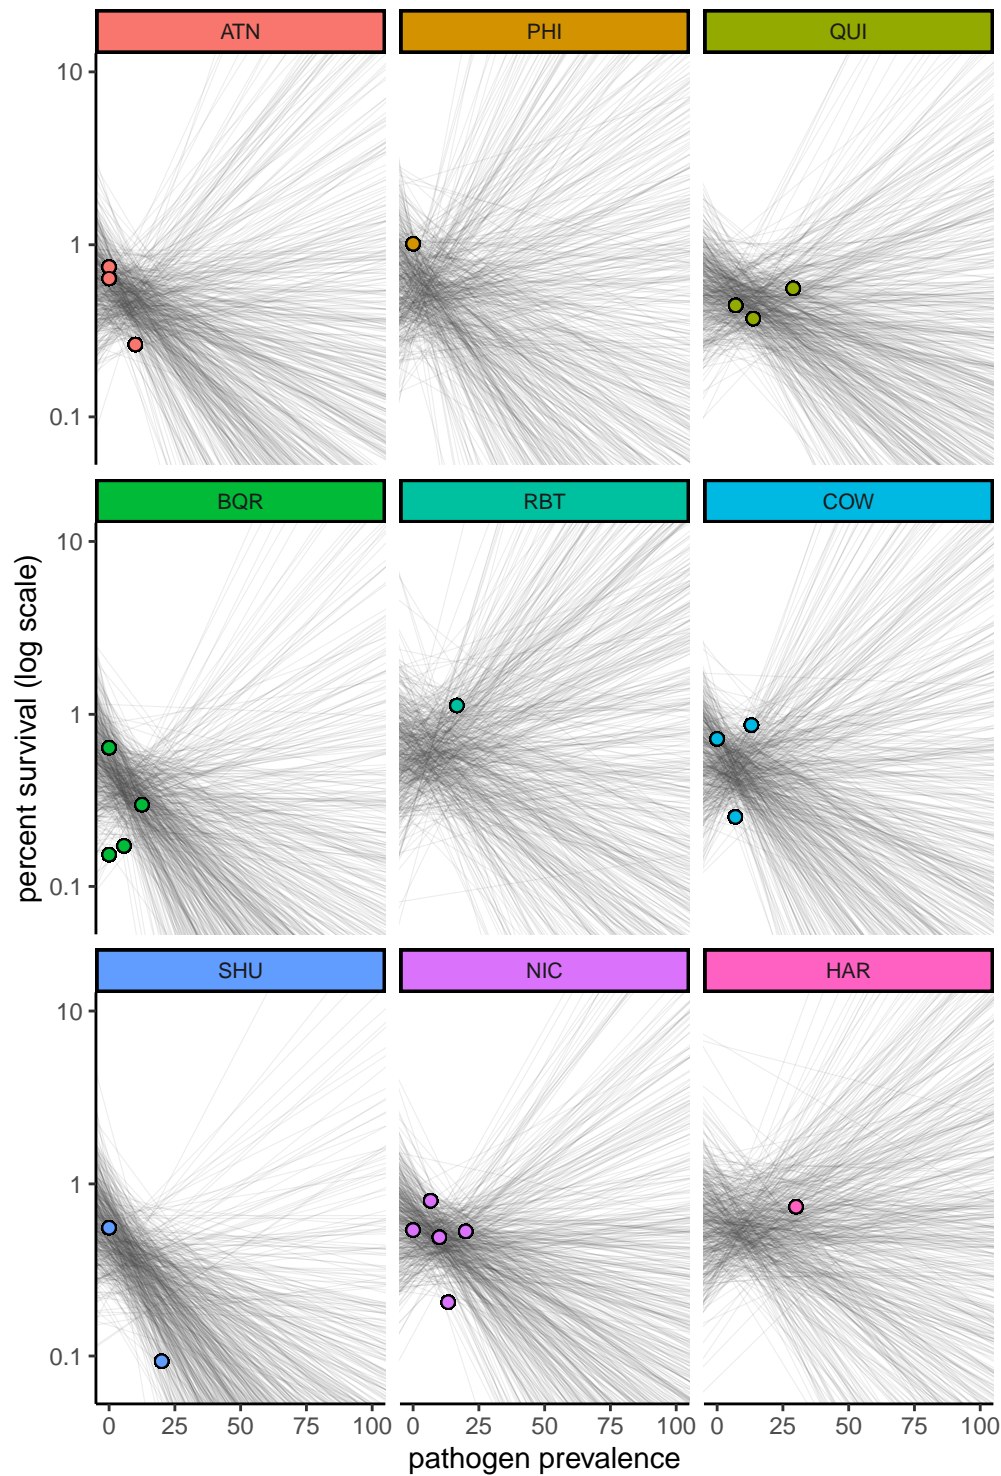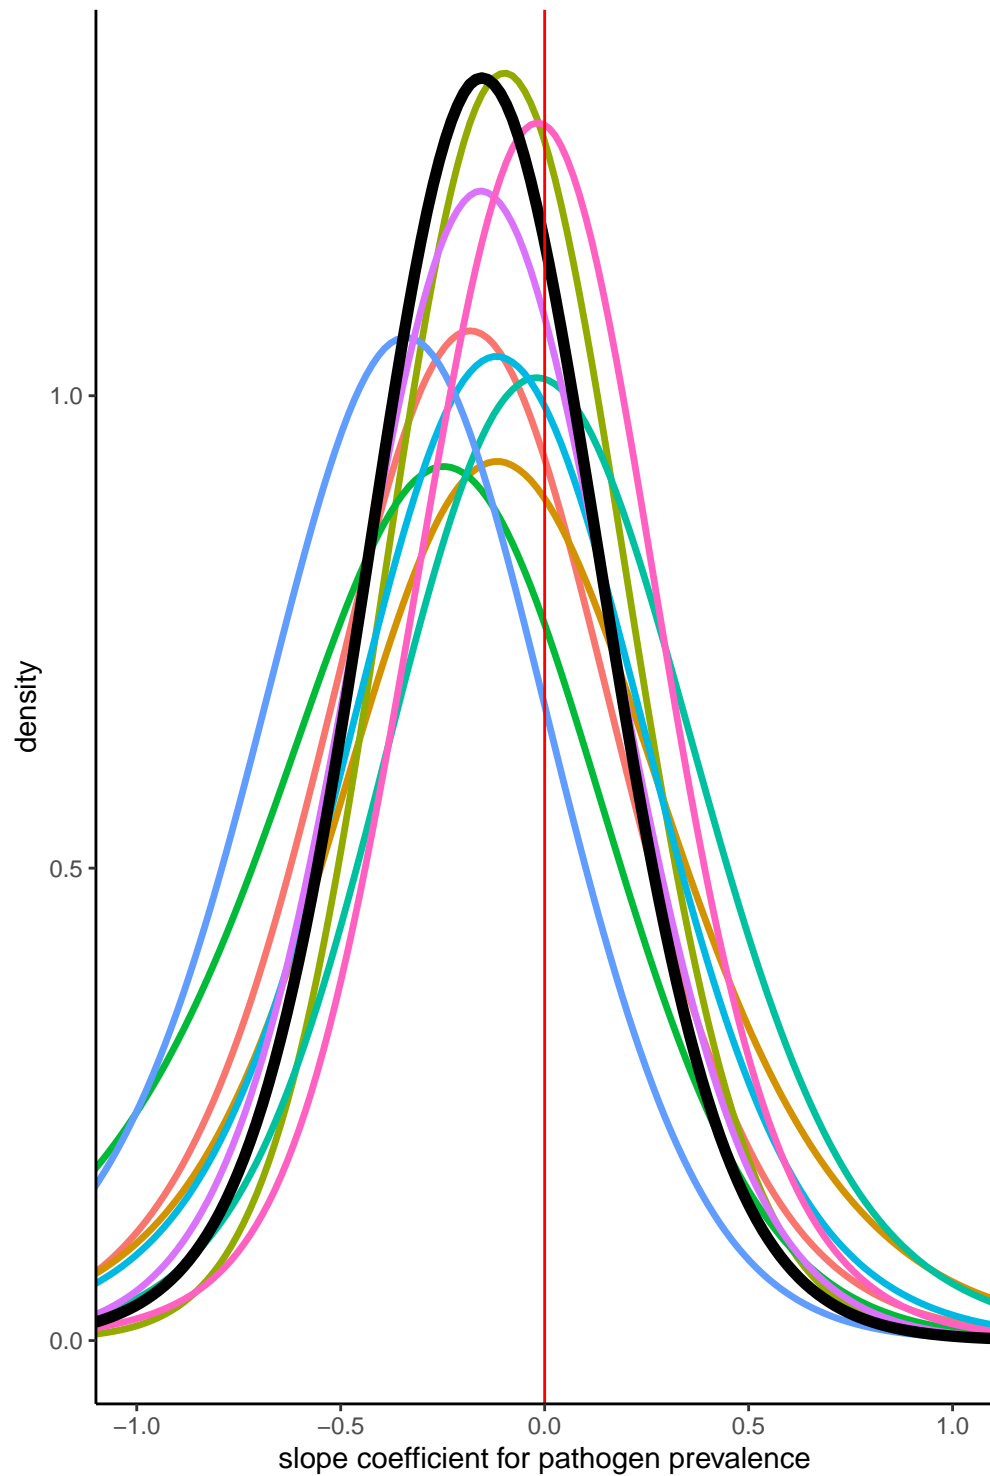

Tetracapsuloides bryosalmonae FaWi

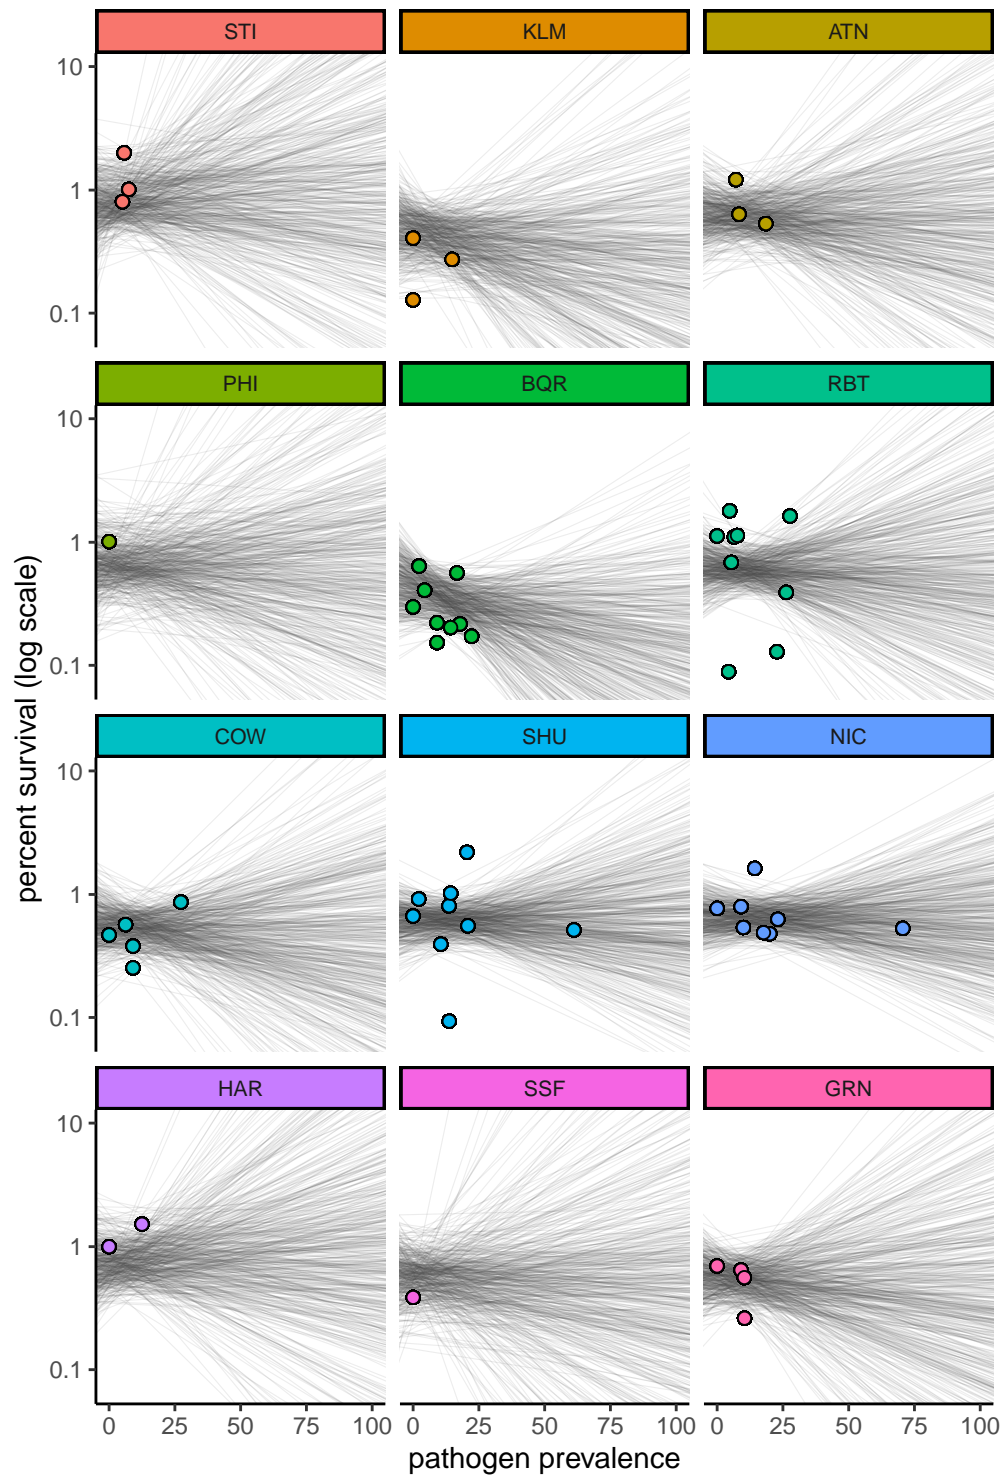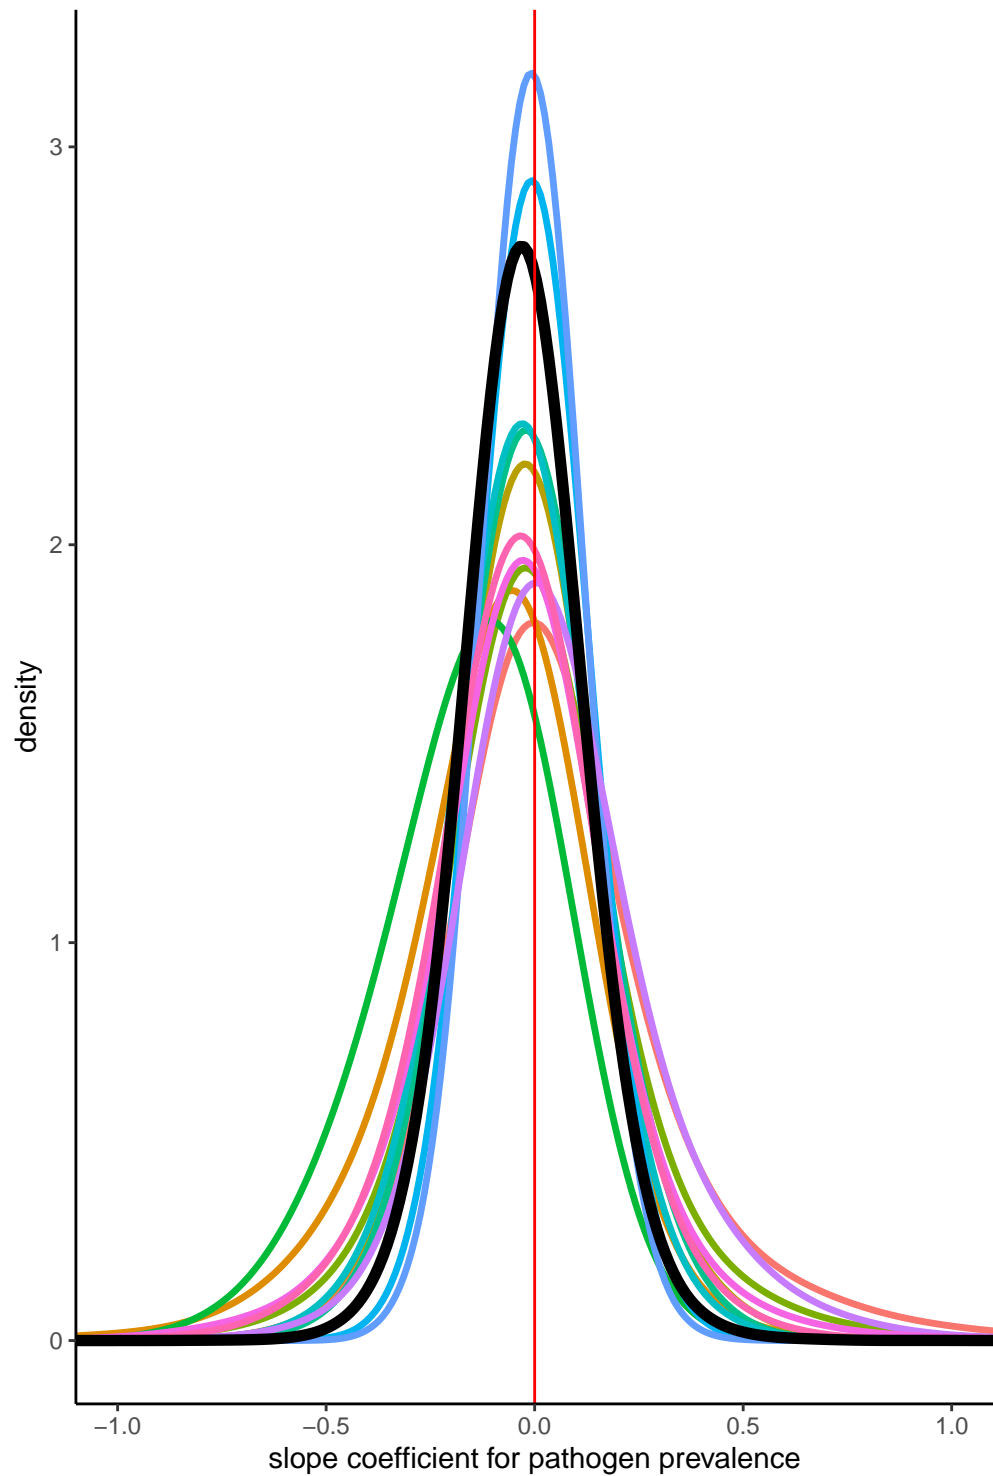

Tenacibaculum maritimum SpSu

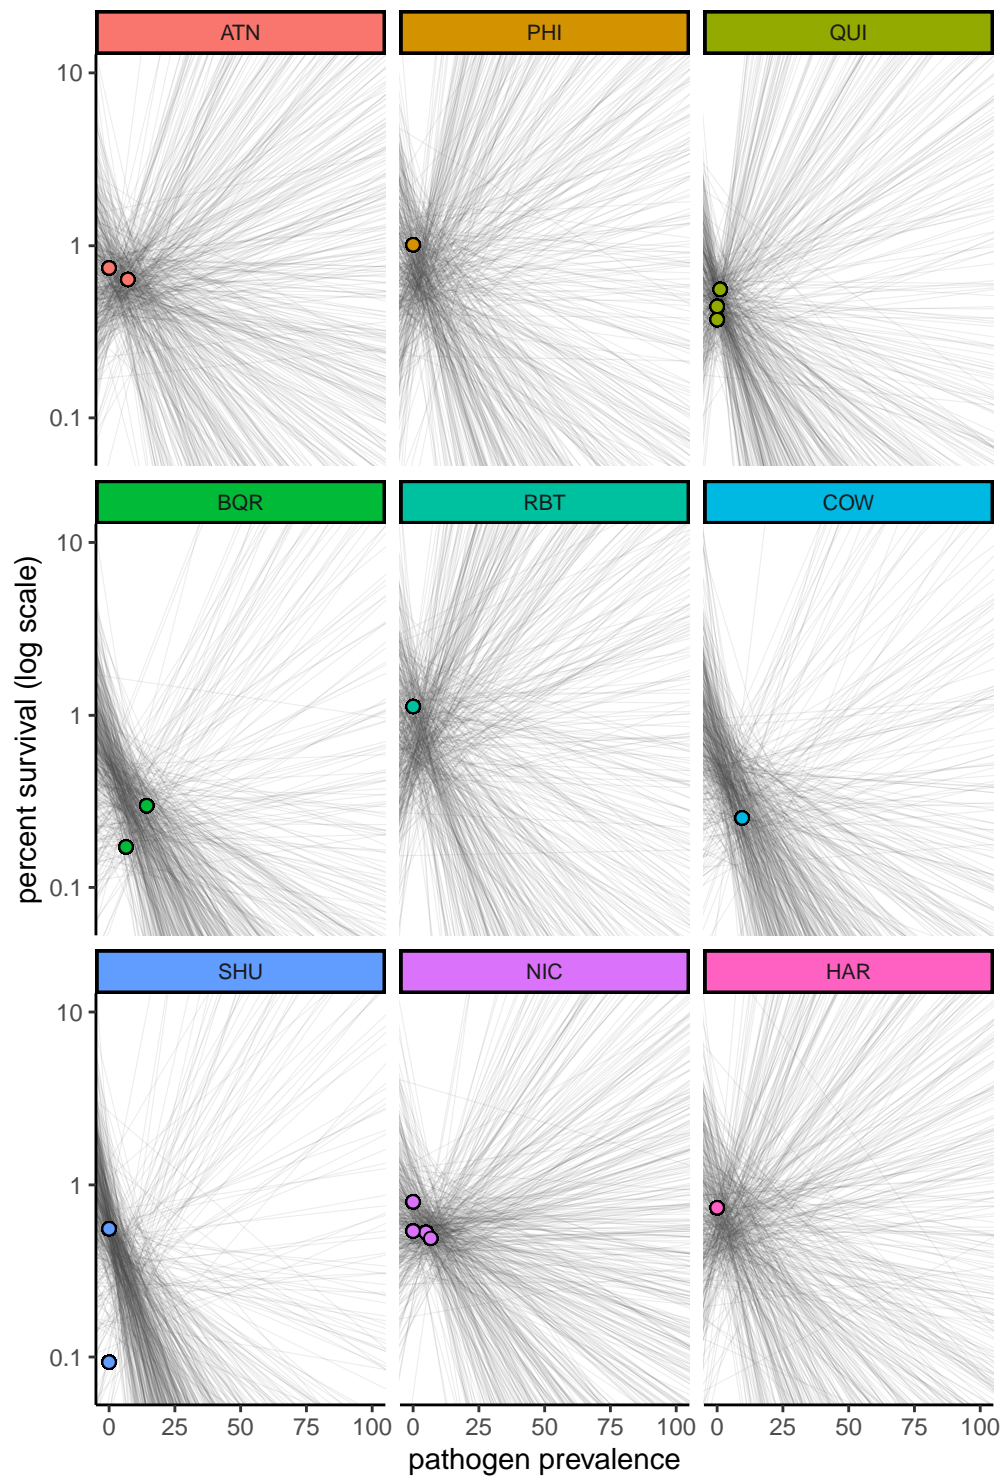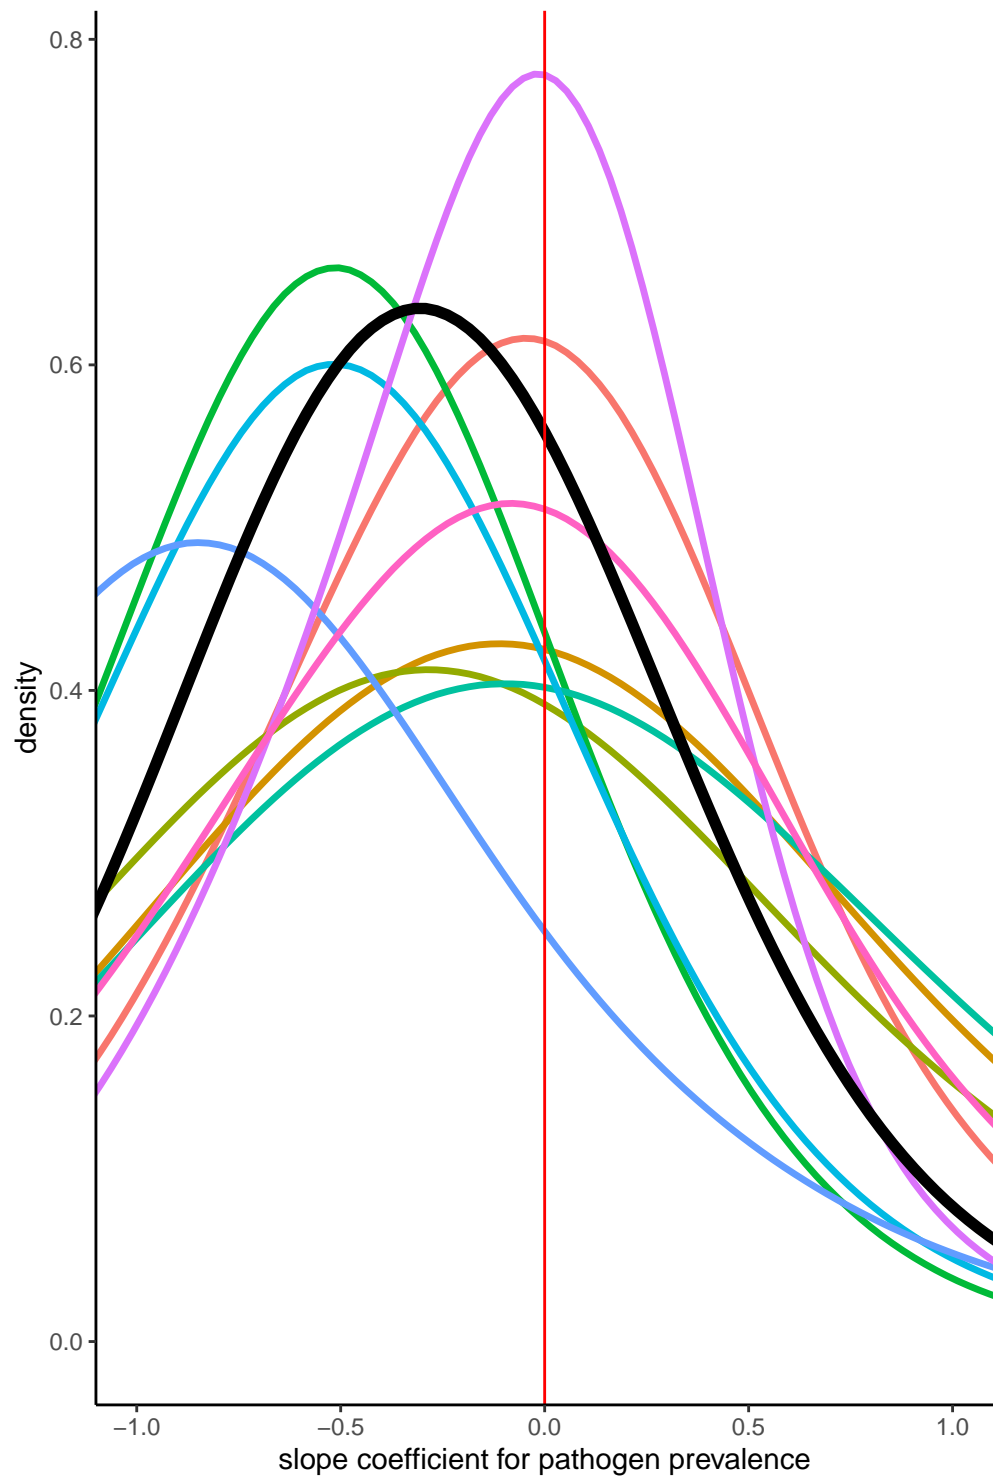

Tenacibaculum maritimum FaWi

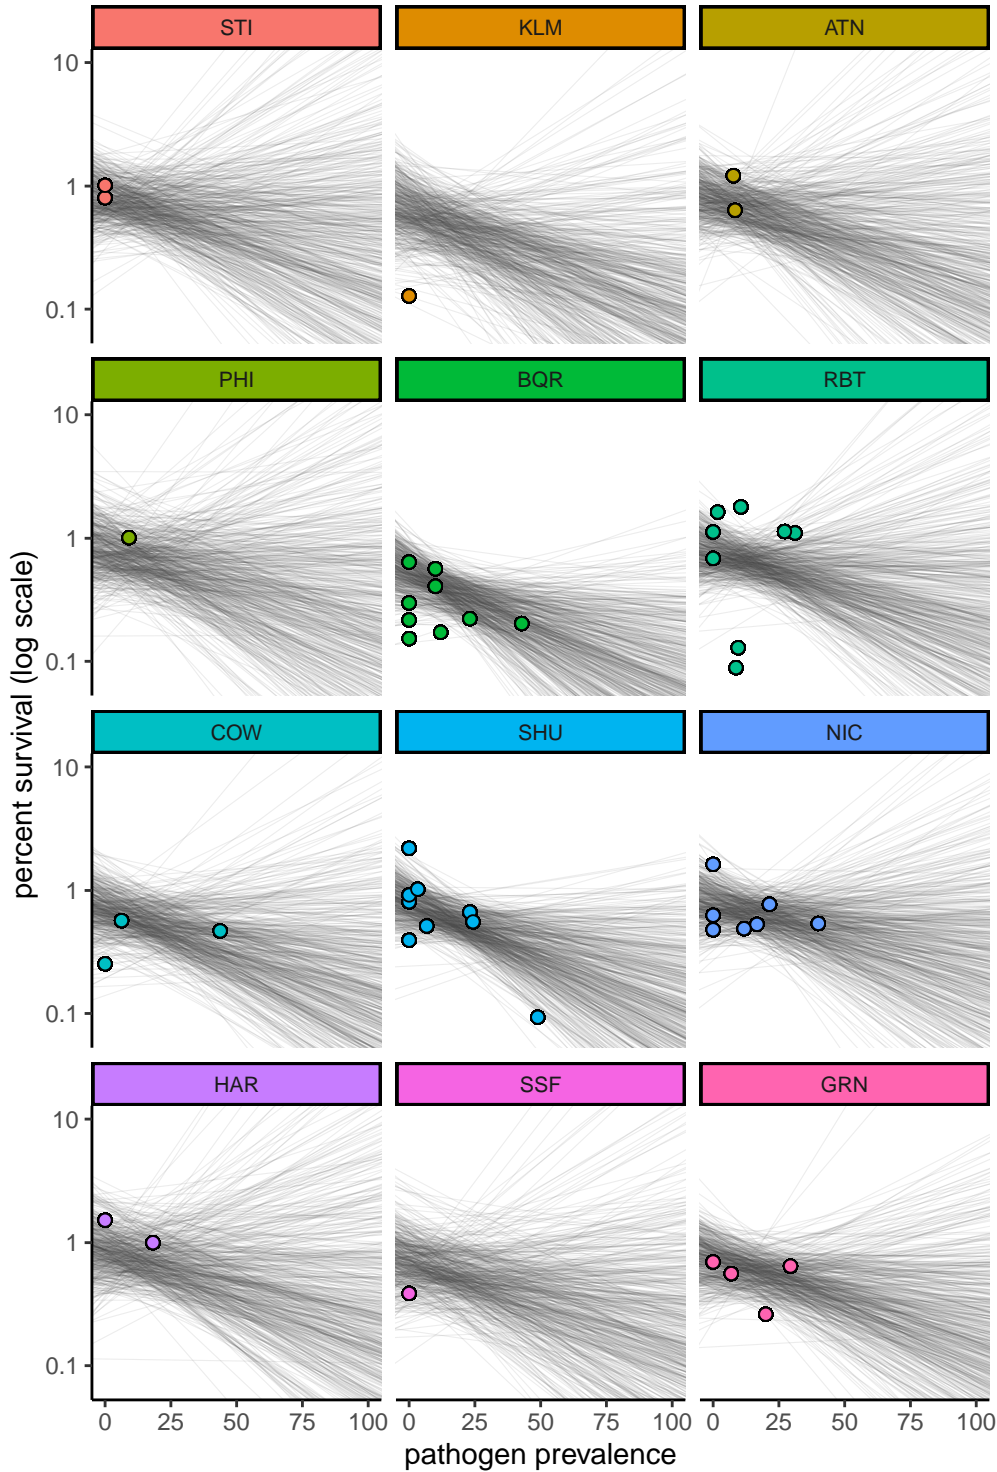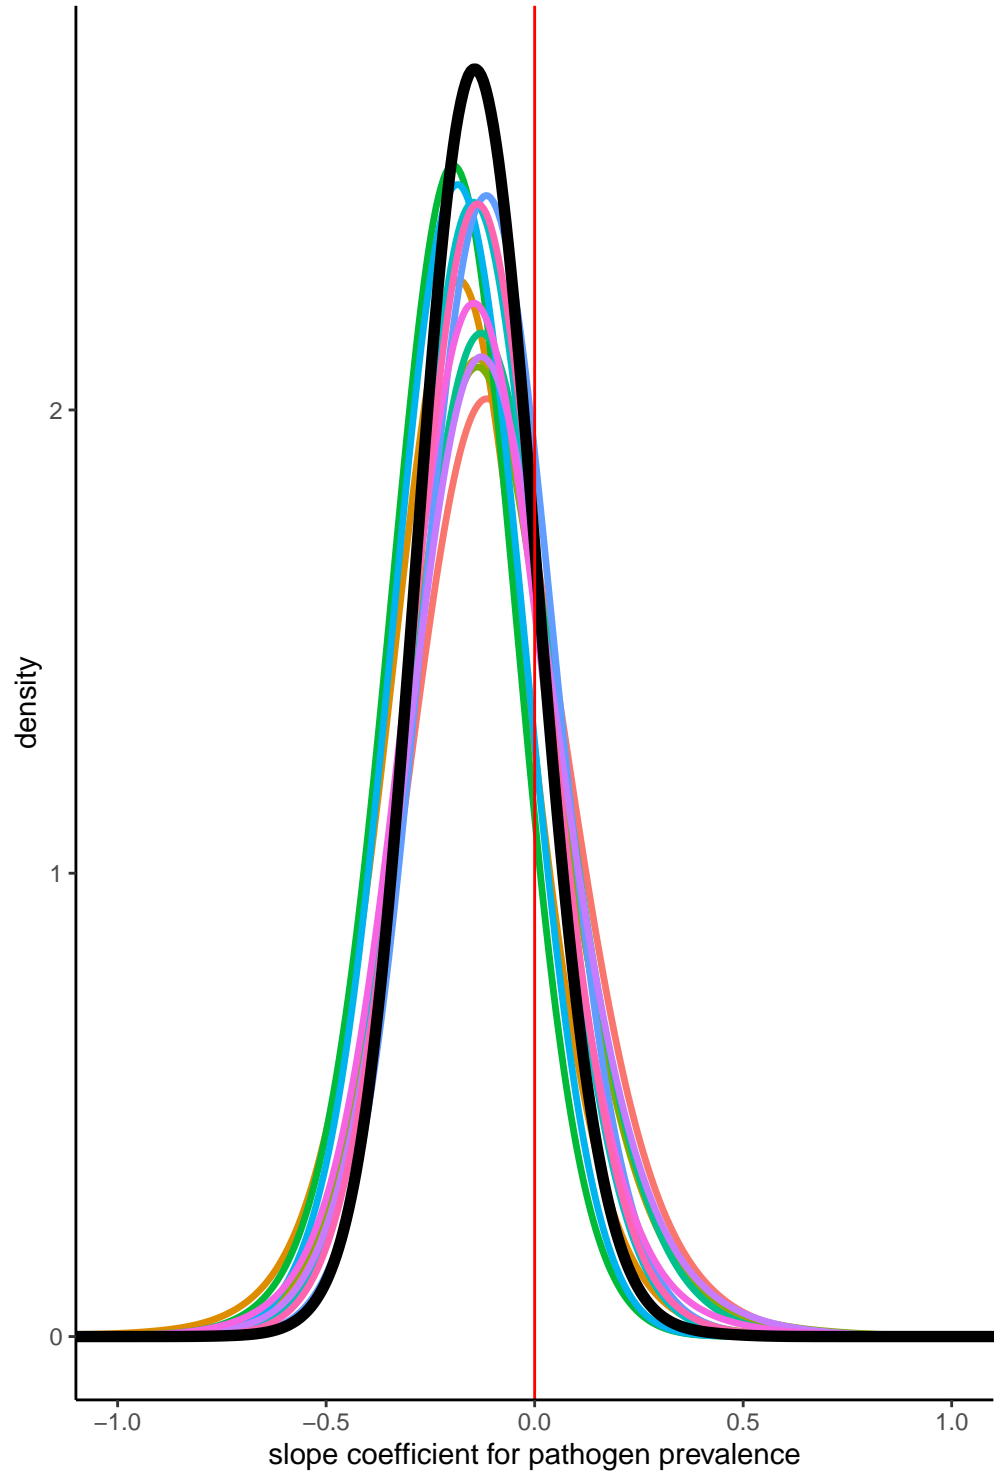

# Erythrocytic Necrosis Virus SpSu

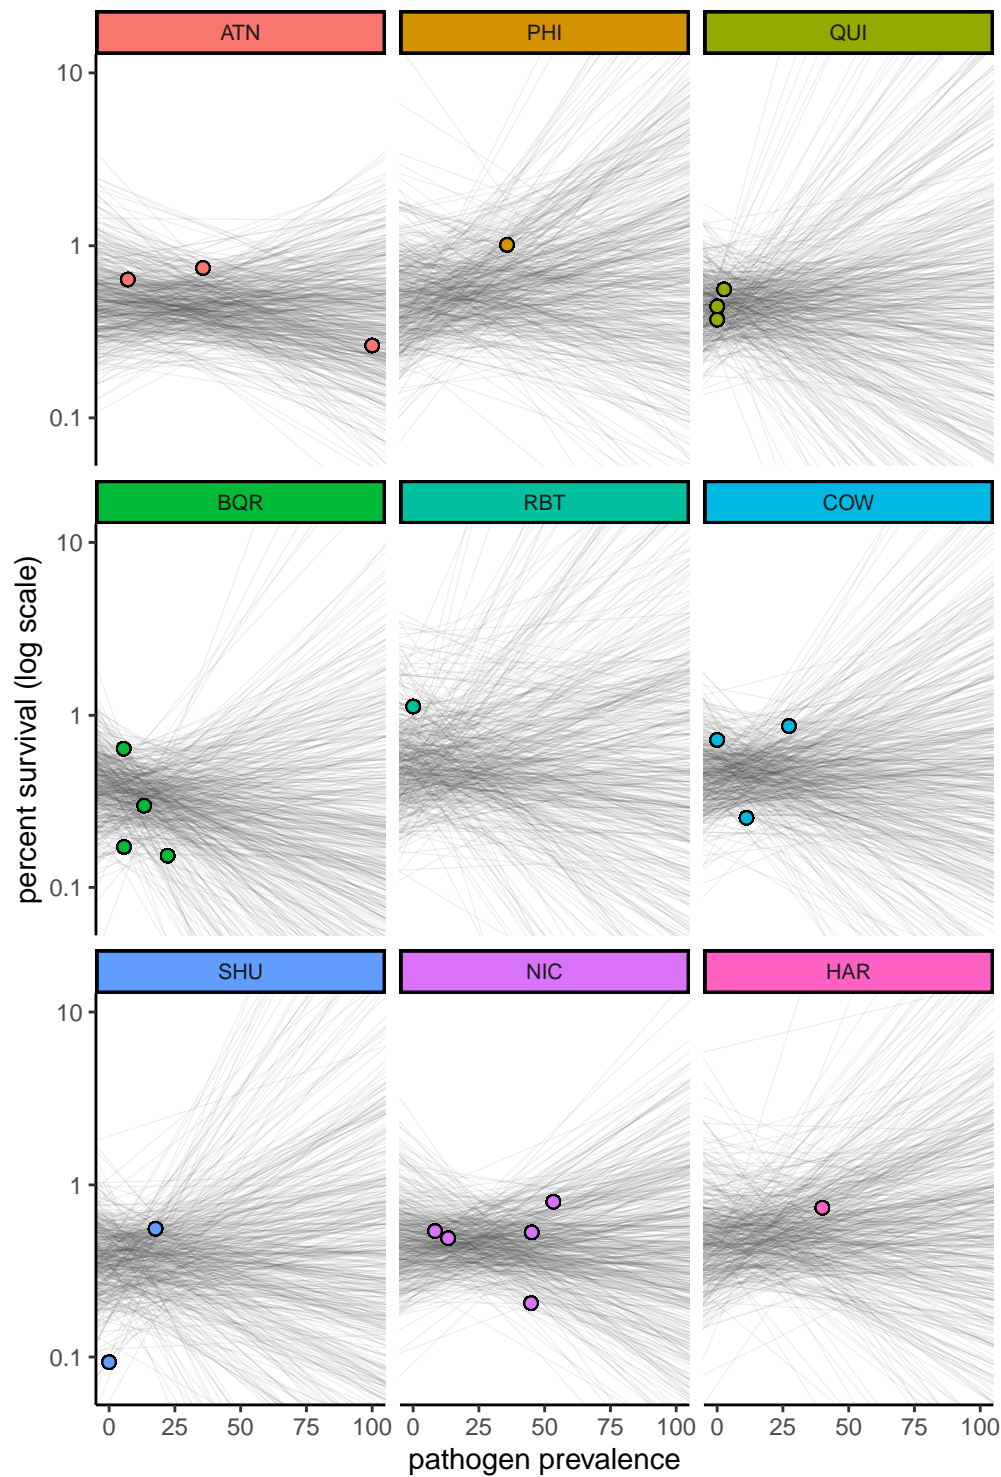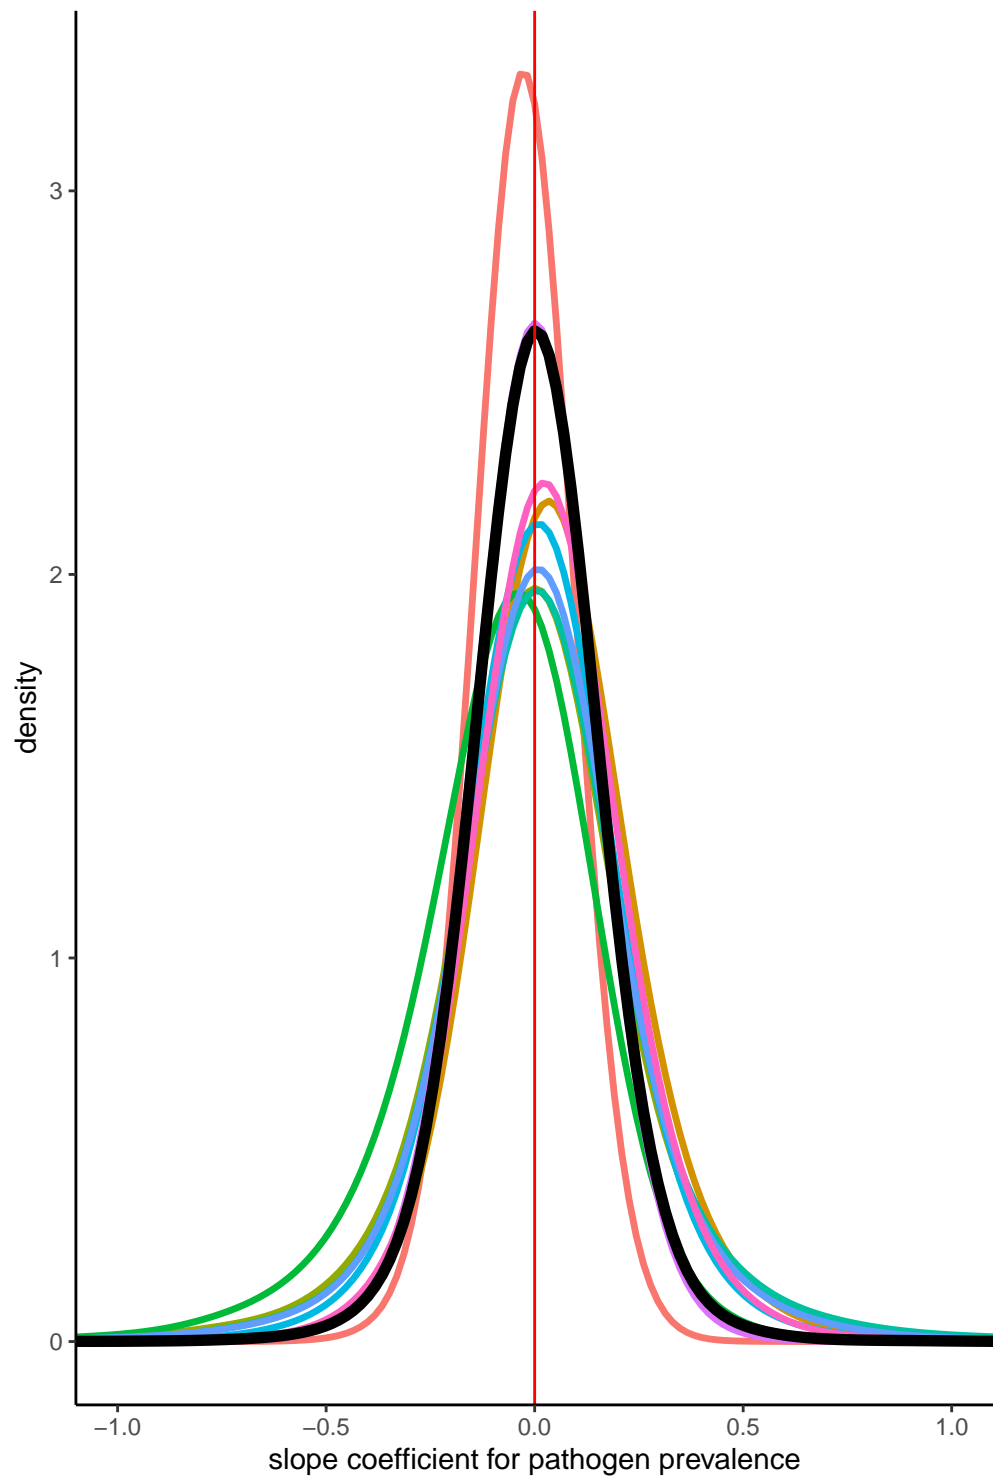

# Erythrocytic Necrosis Virus FaWi

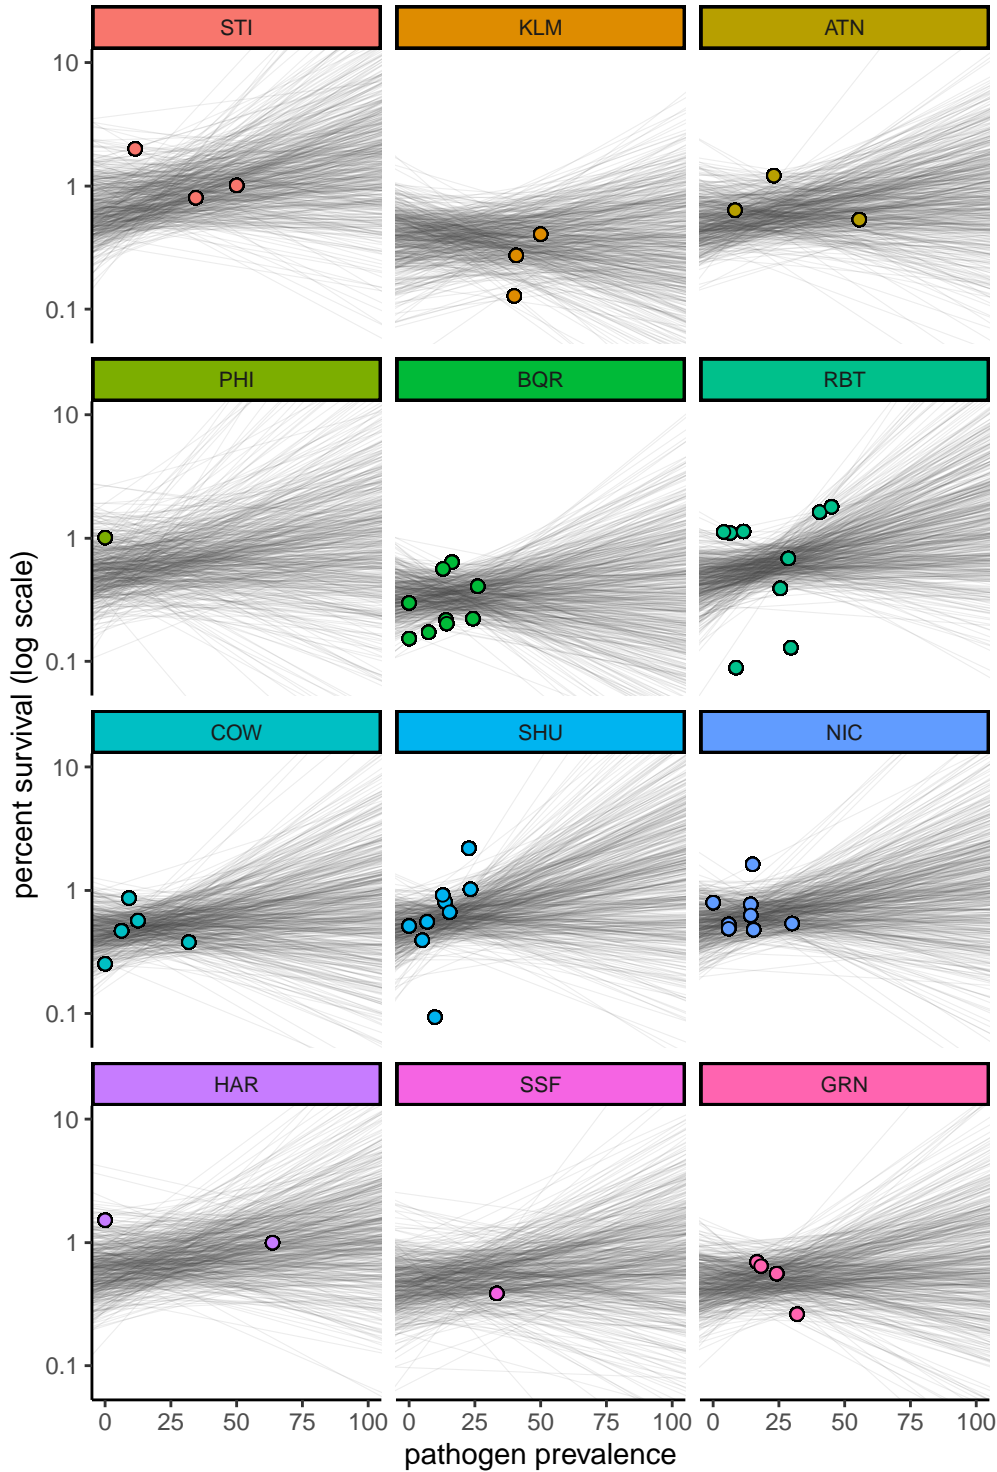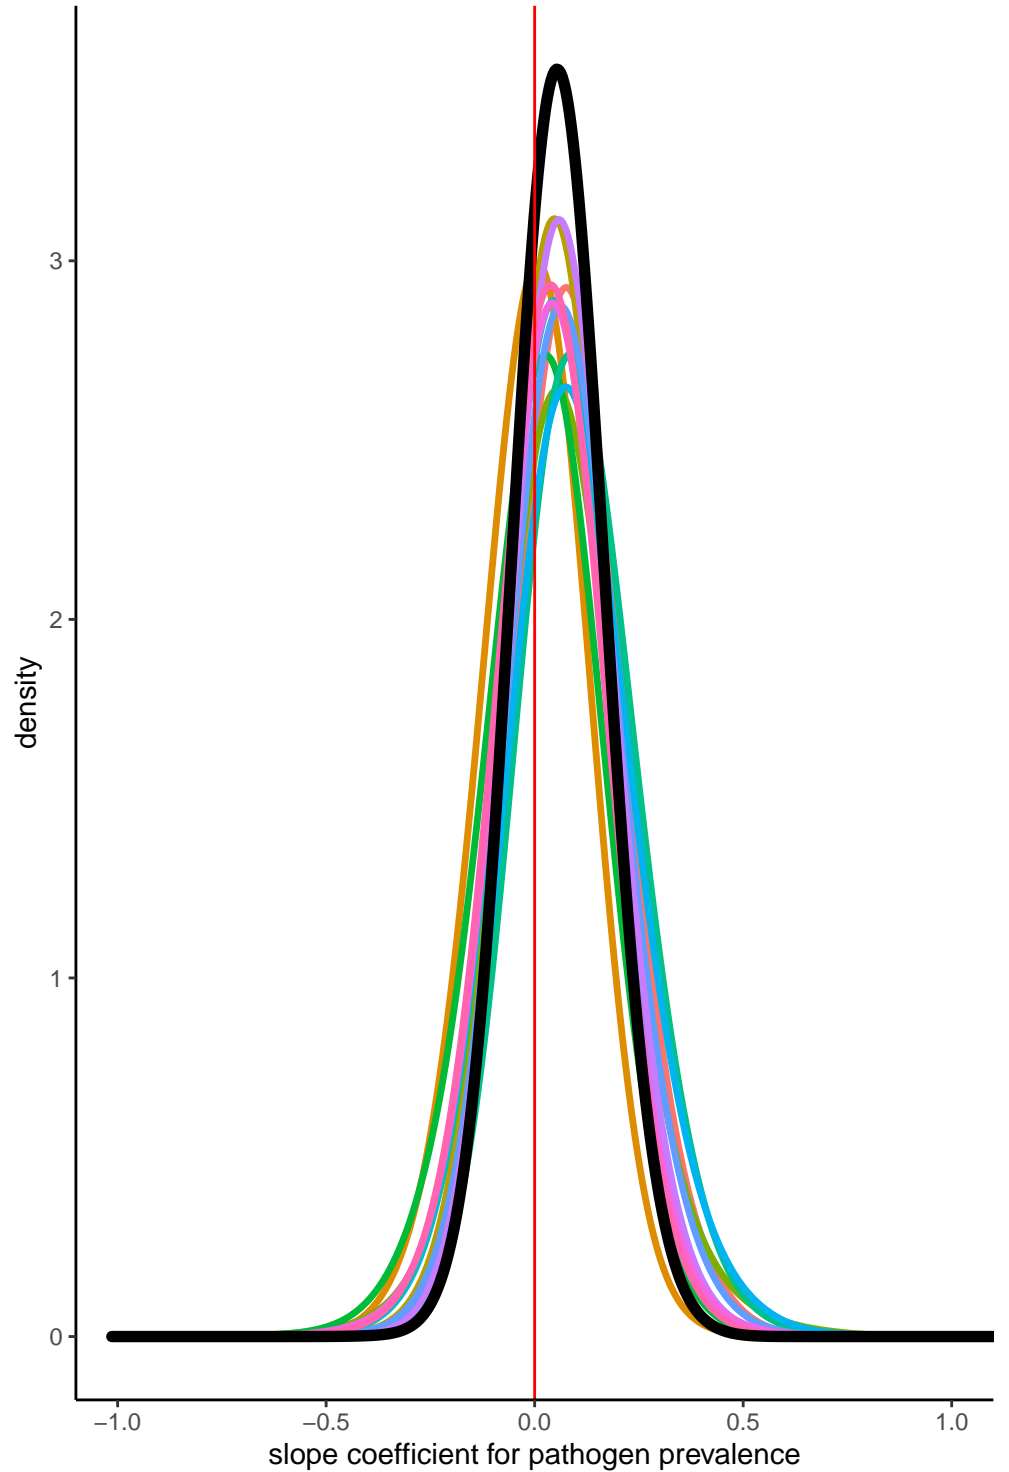



Total number of pathogen taxa SpSu

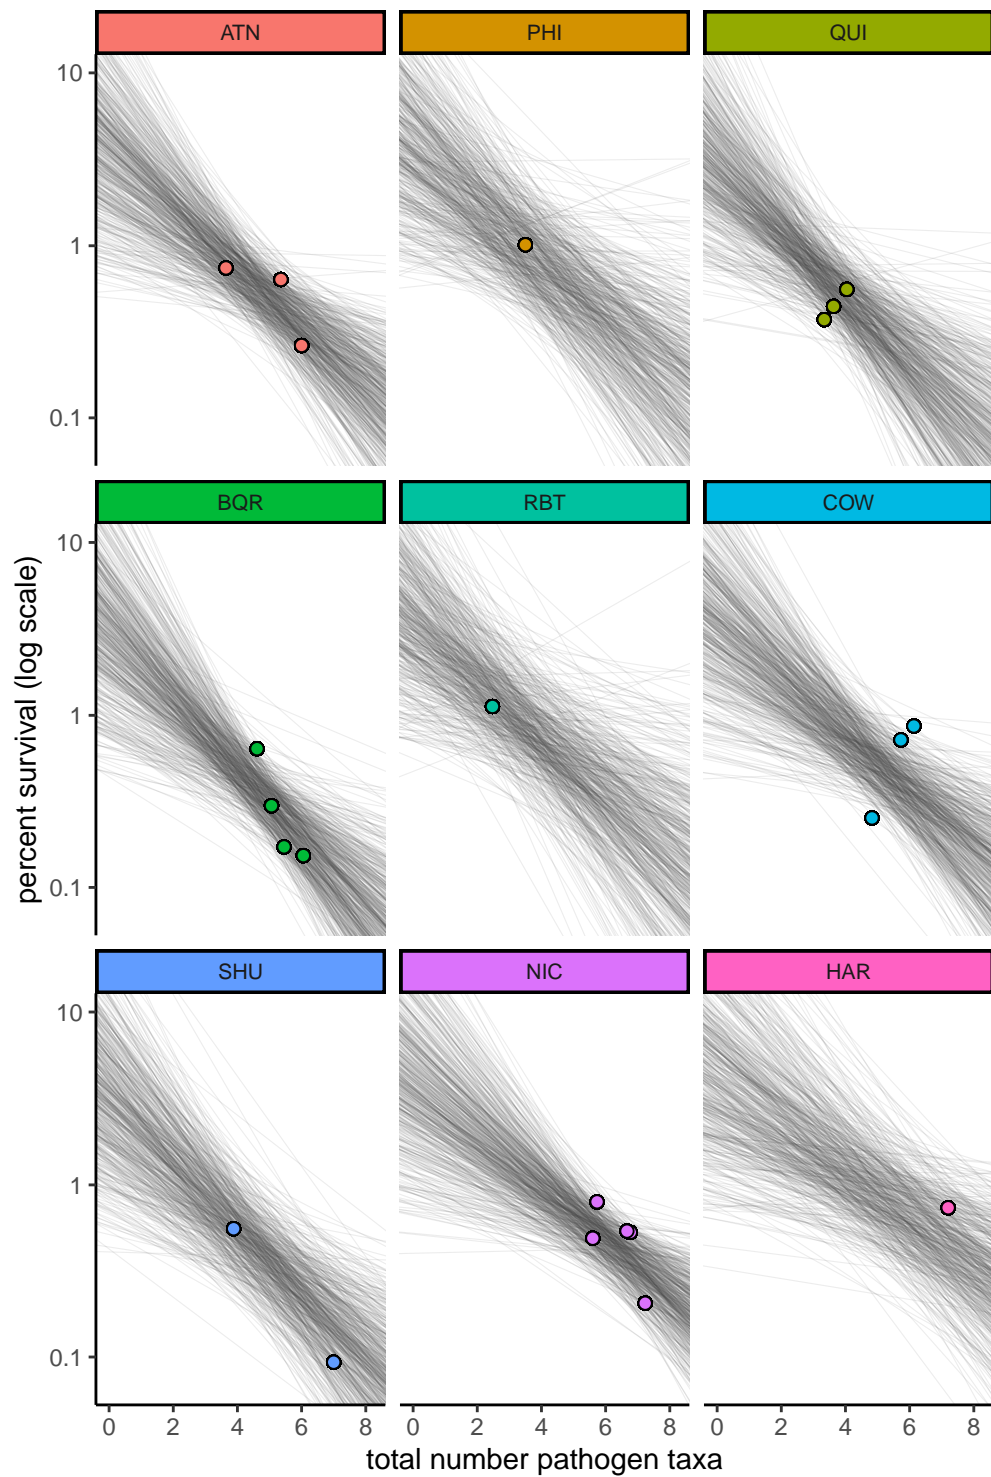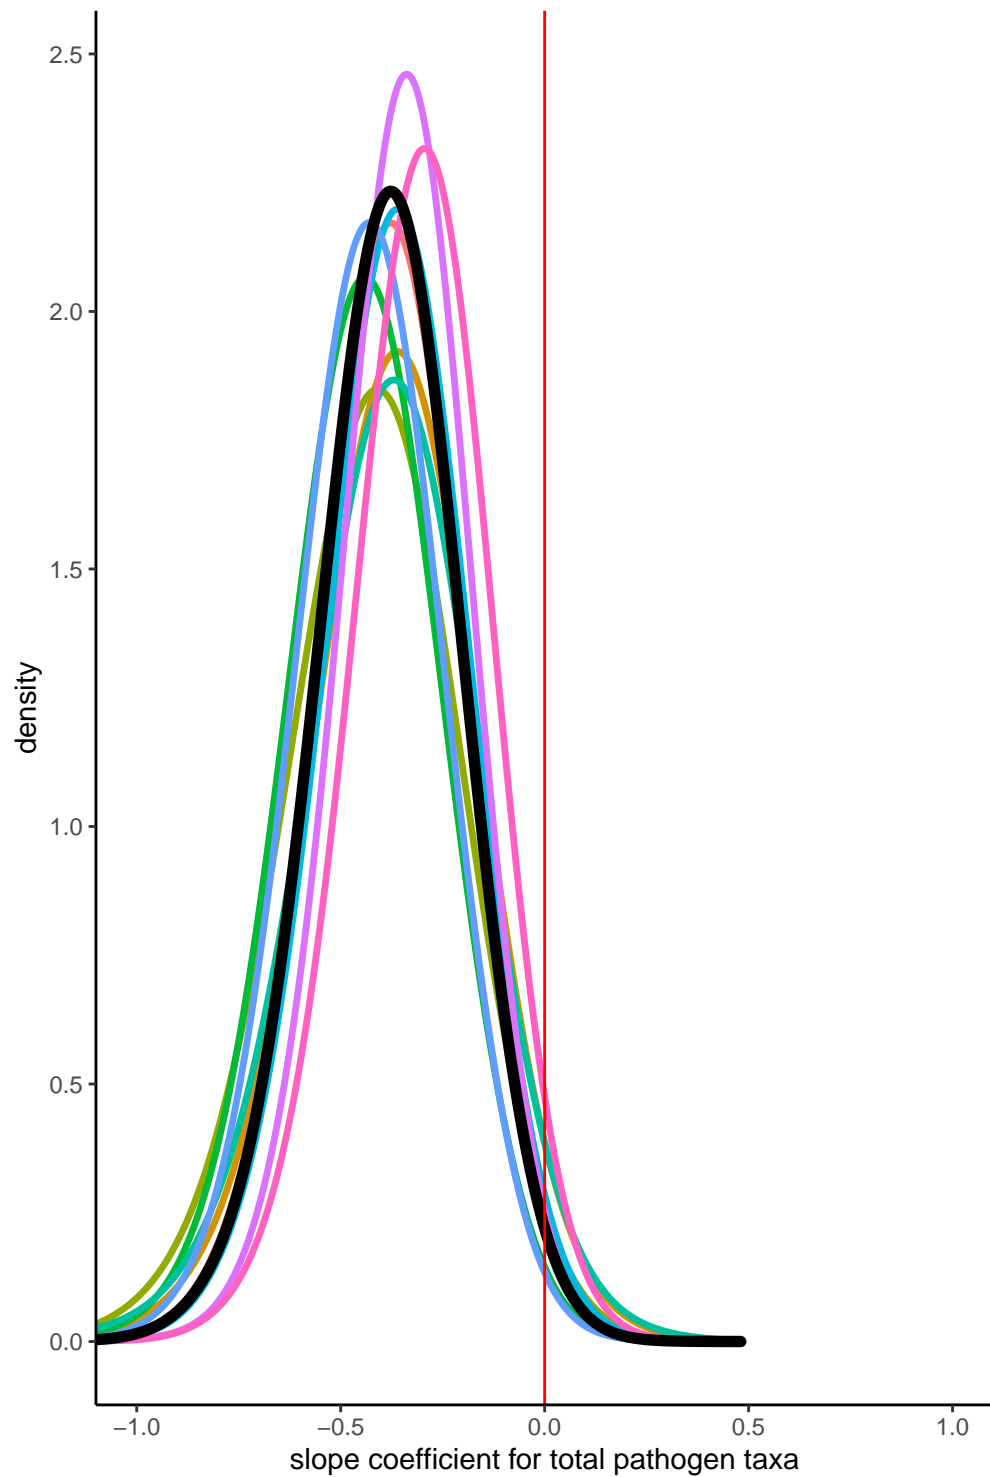

Total number of pathogen taxa FaWi

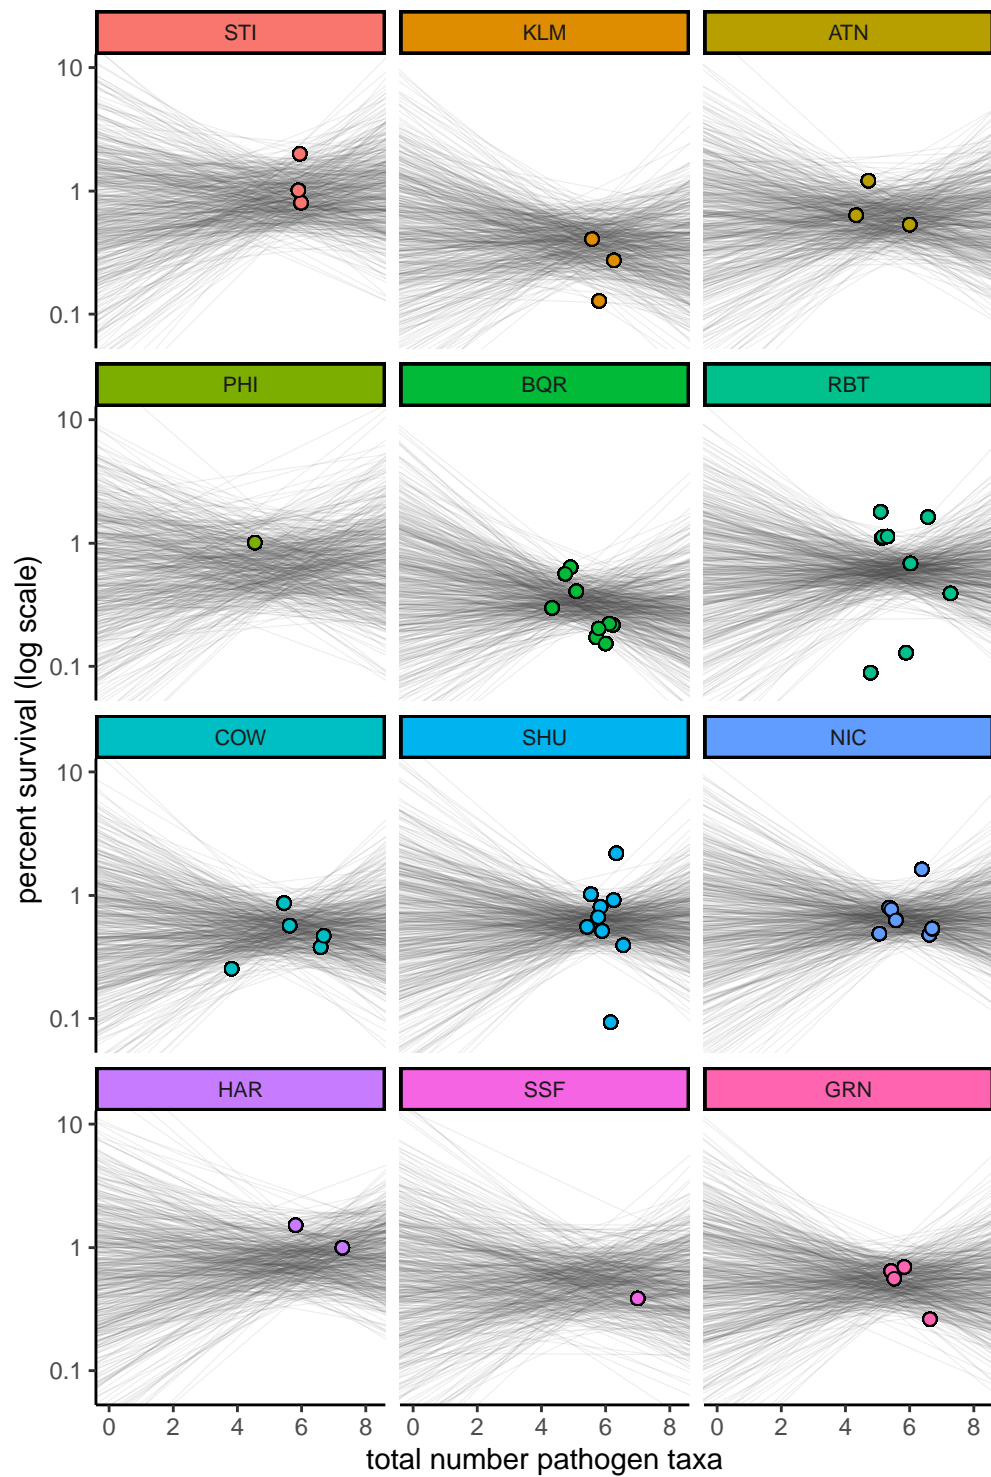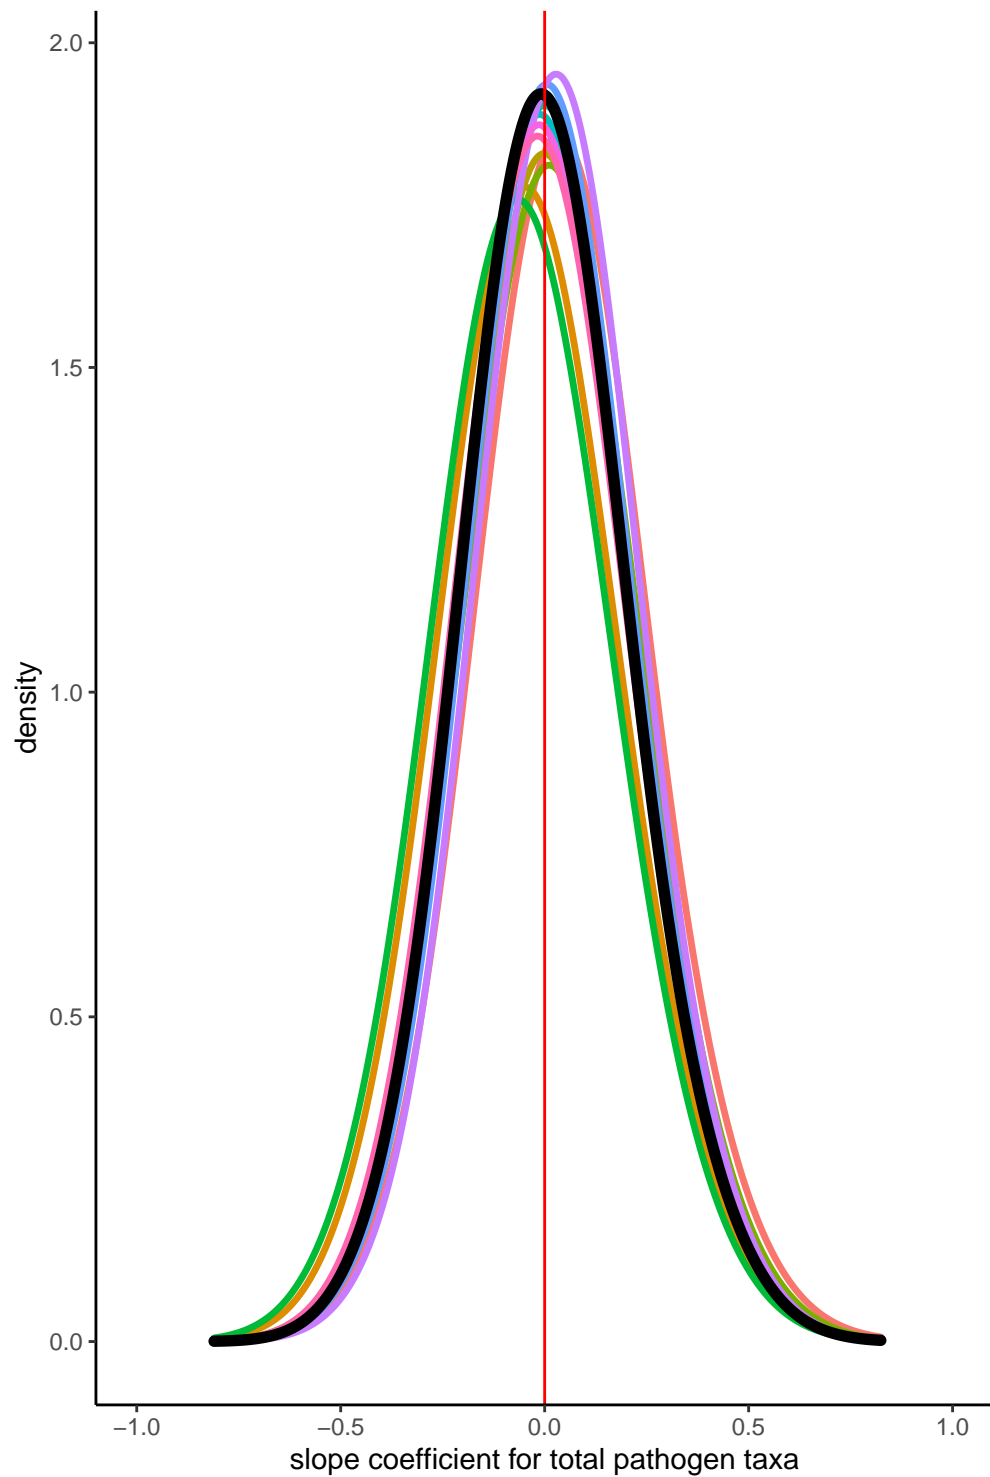

Relative infectious agent burden SpSu

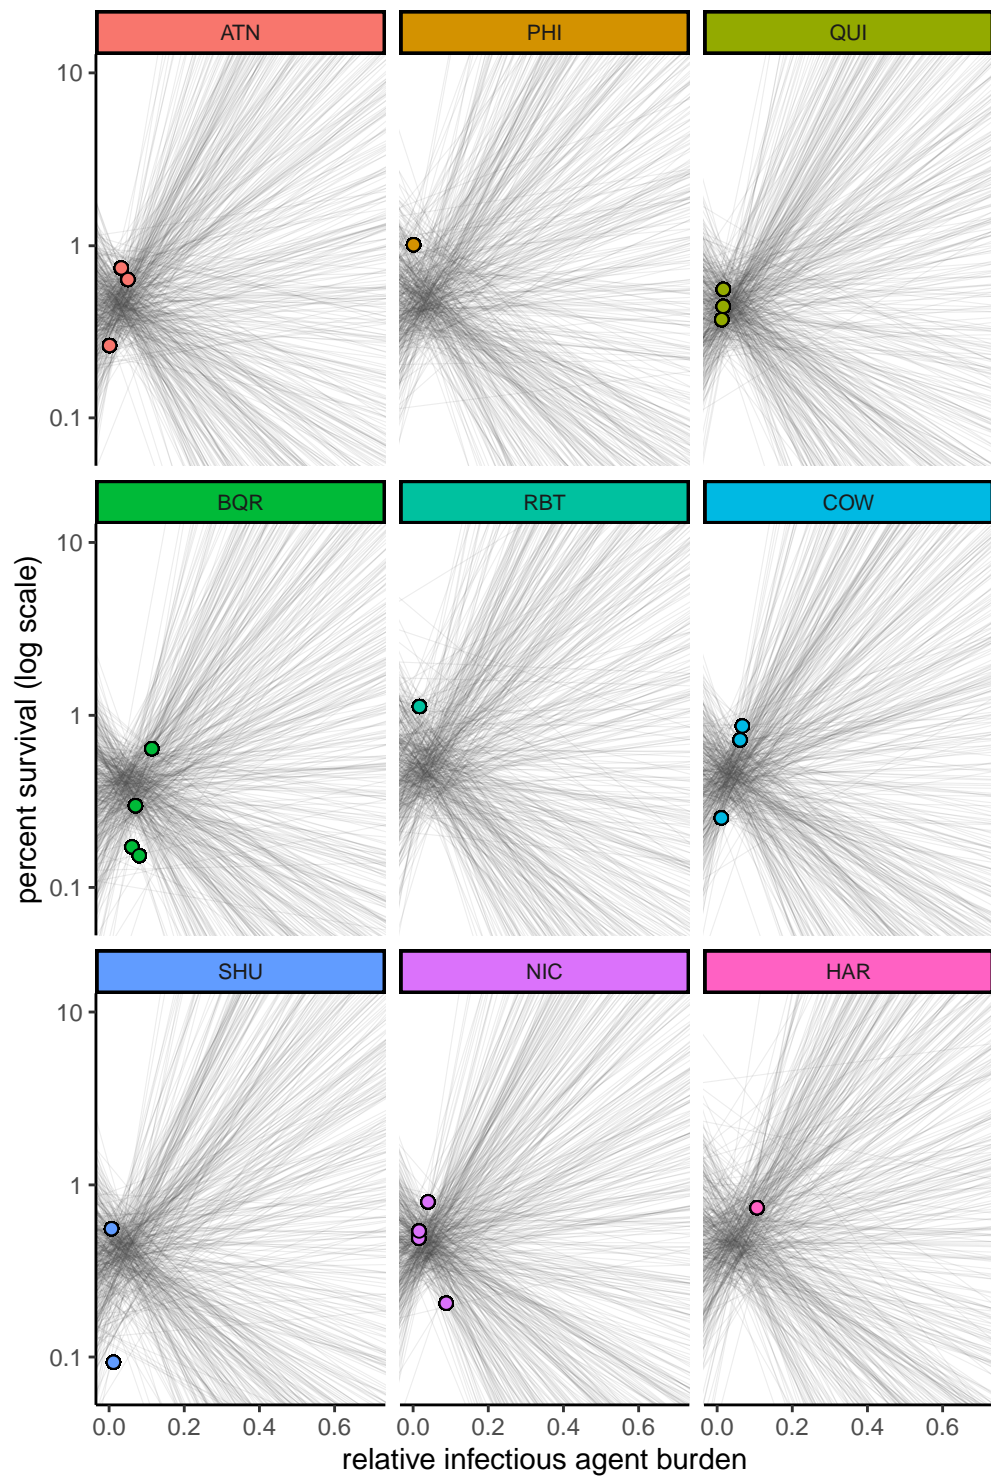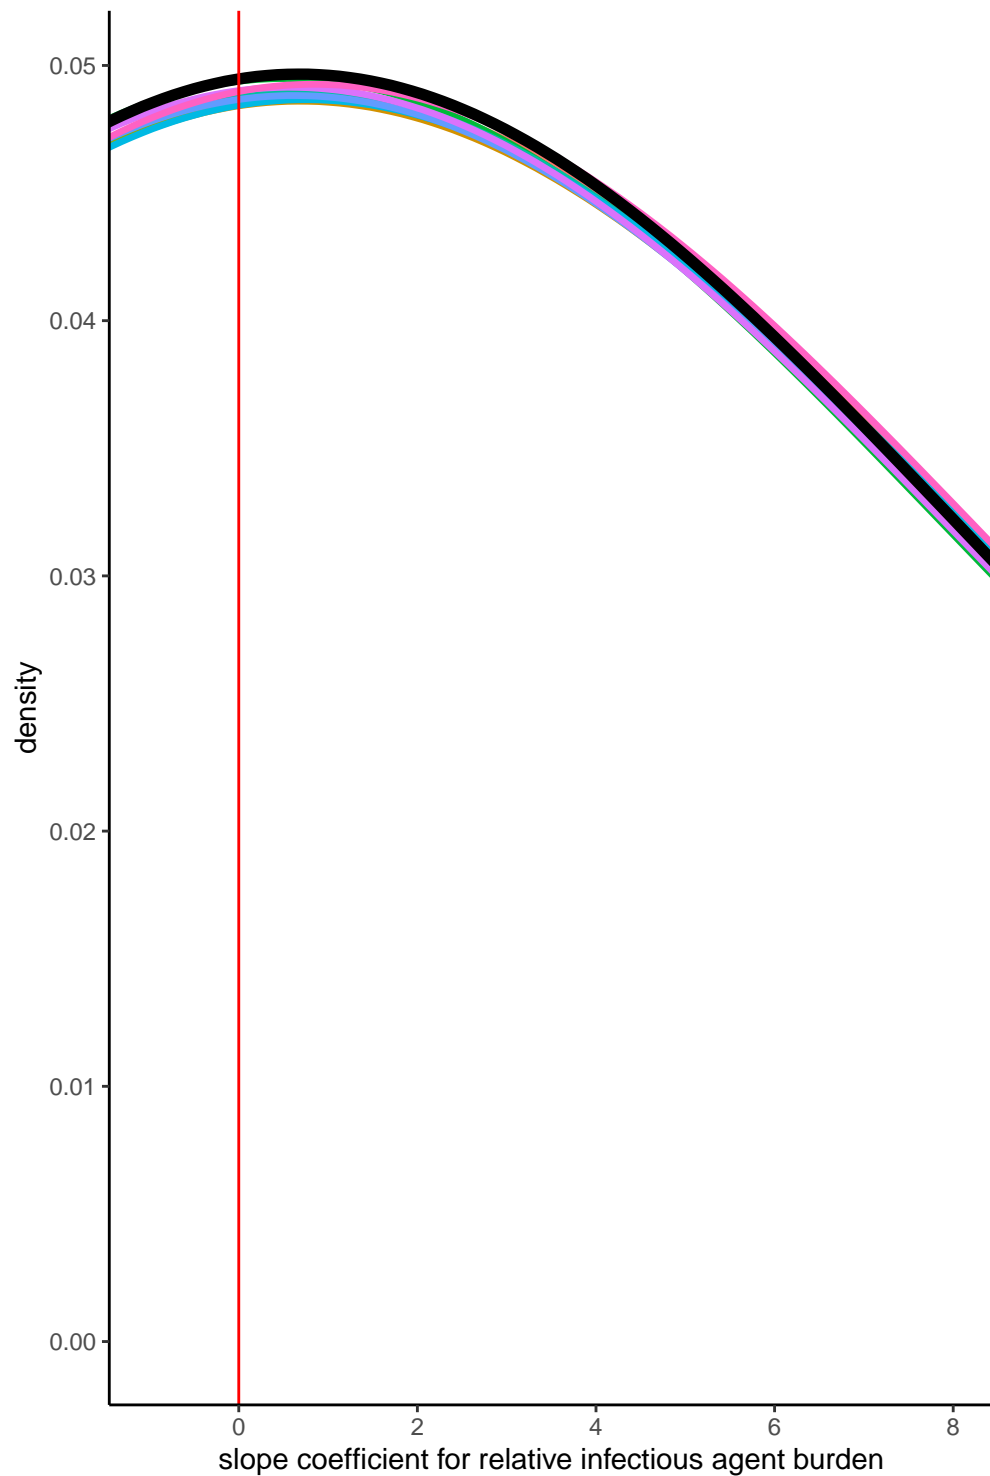

Relative infectious agent burden FaWi

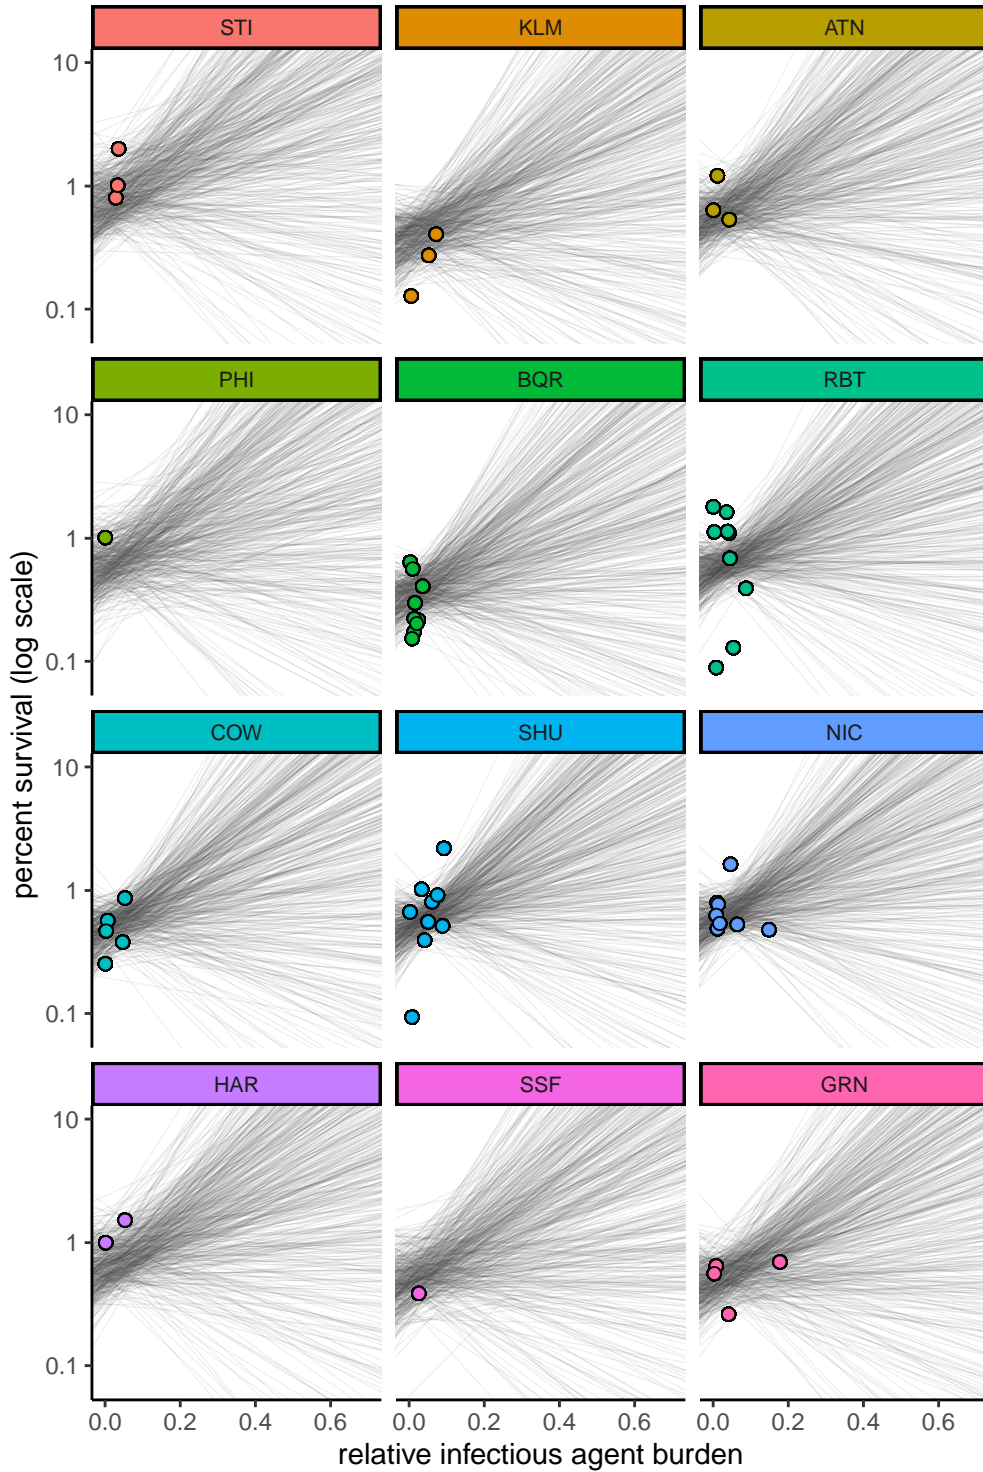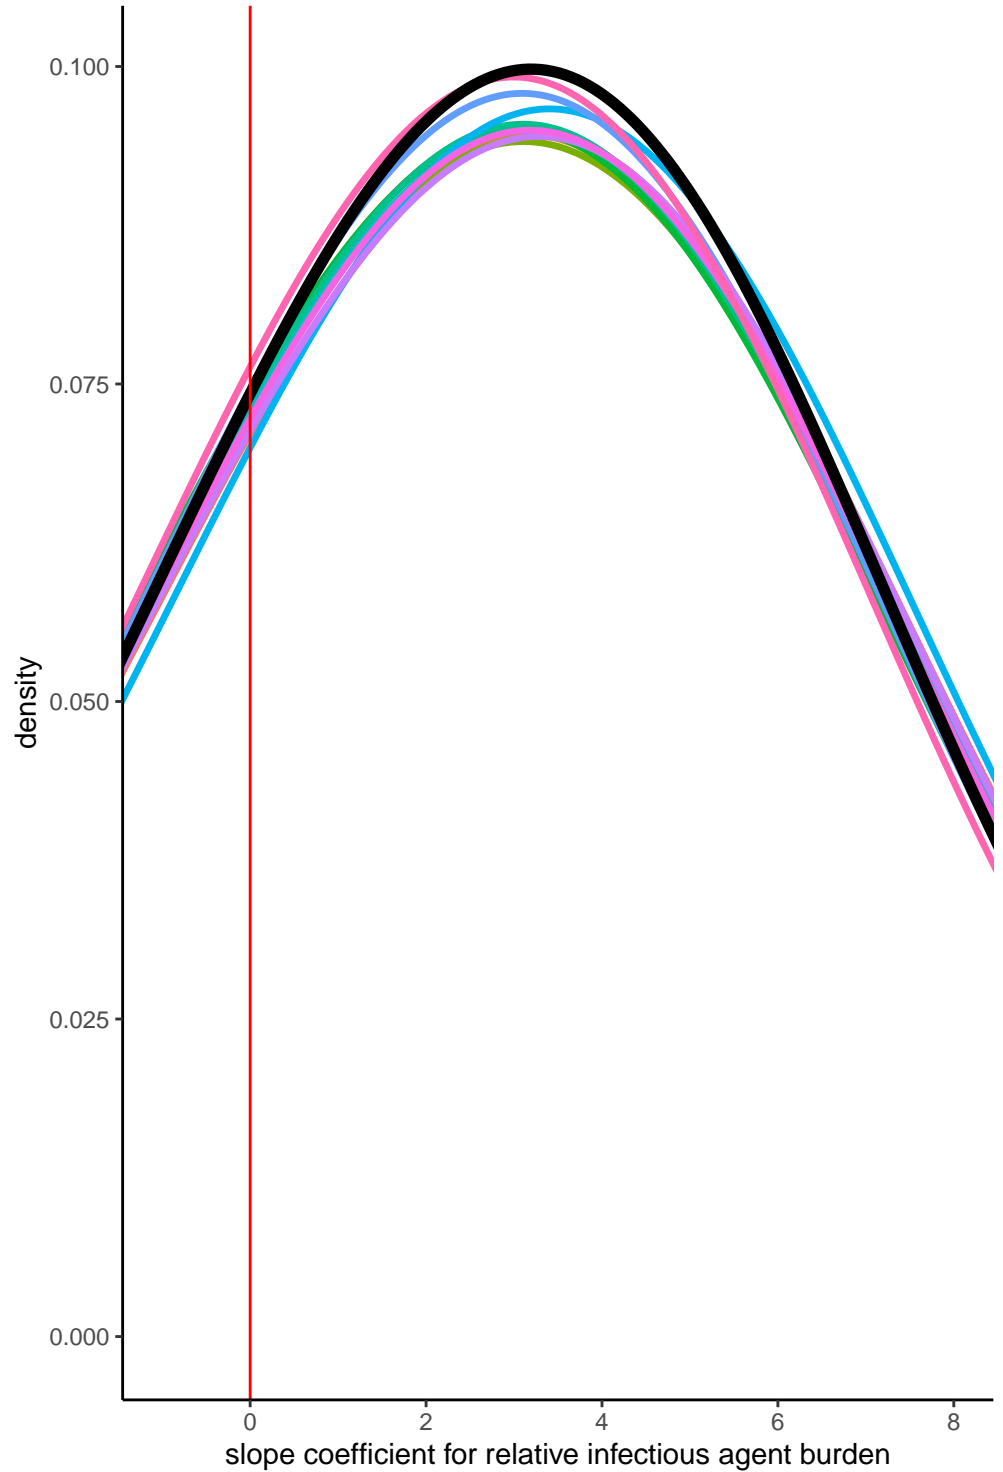

Supplement: facets-2021-0102_supplement2.pdf [file facets-2021-0102_supplement2.pdf]
