# Supplementary material for: Identification of infectious agents in early marine Chinook and Coho salmon associated with cohort survival
Source: Atypon-hosted journal article supplement (doi:10.1139/facets-2021-0102), 2022-01-01

### **Supplementary Material 3: Coho survival model figures**

#### **"Identification of infectious agents in early marine Chinook and Coho salmon associated with cohort survival"**

Arthur L. Bass, Andrew W. Bateman, Brendan M. Connors, Benjamin A. Staton, Eric B. Rondeau, Gideon J. Mordecai, Amy K. Teffer, Karia H. Kaukinen, Shaorong Li, Amy M. Tabata, David A. Patterson, Scott G. Hinch, Kristina M. Miller

**Description:** Bayesian multi-level model results from Coho survival models. Raw data (points) are presented in left panels and model results are presented in right panels (heavy black line indicates the posterior distribution of the hyperdistribution mean). Lines in left panels represent 1000 random draws from the posterior distributions of the stock-specific intercepts and slopes. Slope coefficient for the right panel is relative to a 10% increase in pathogen prevalence.

Candidatus Branchiomonas cysticola SpSu

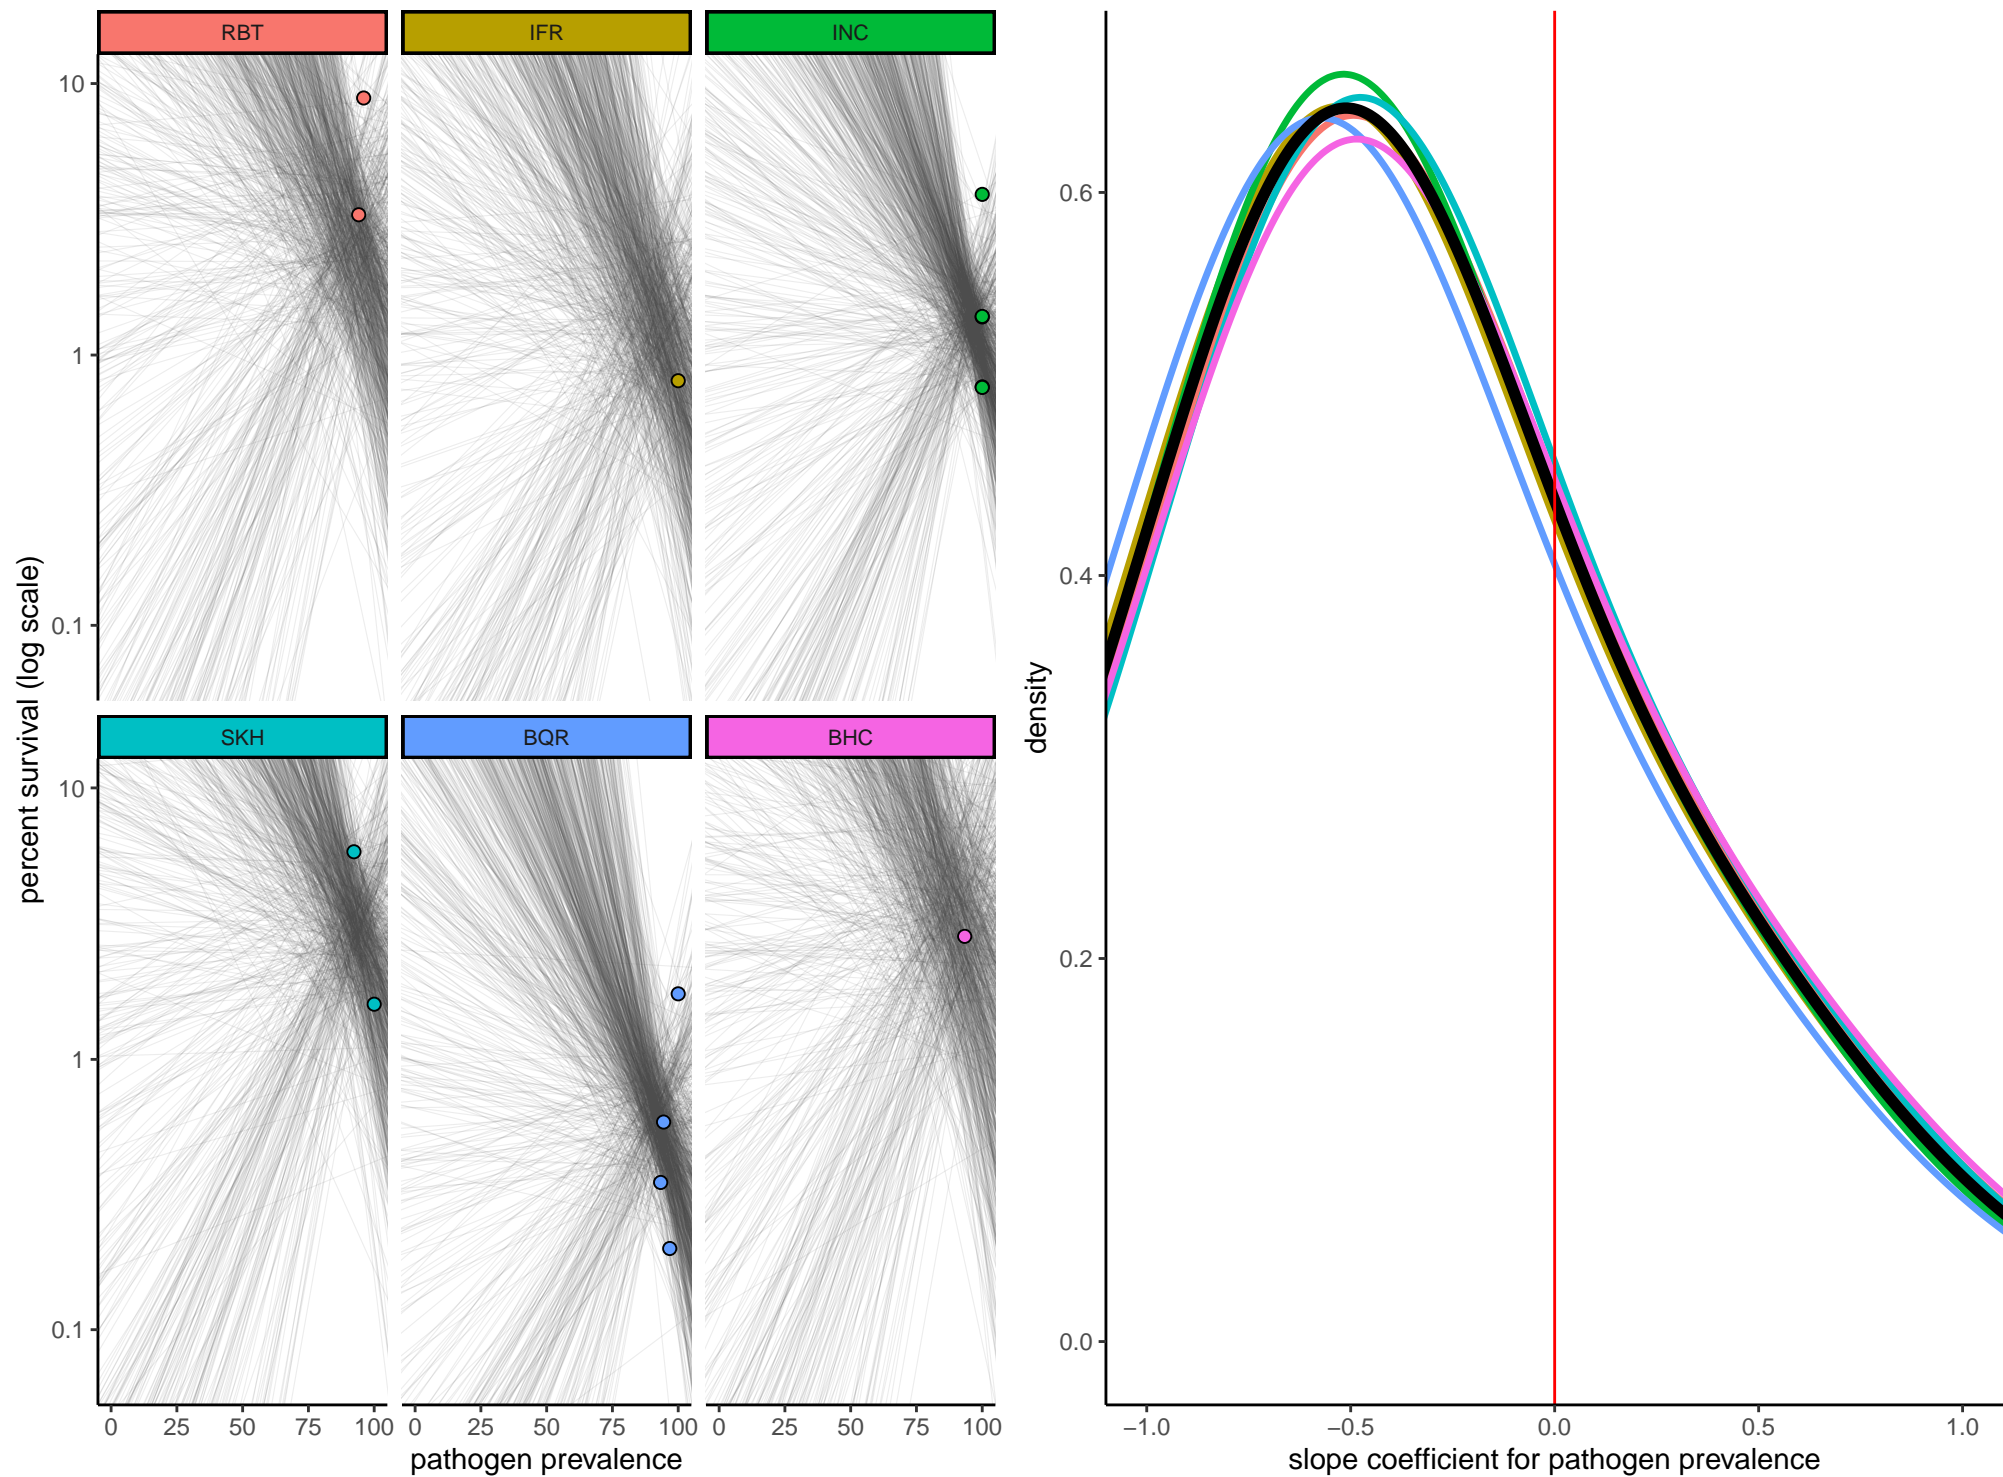

Candidatus Branchiomonas cysticola FaWi

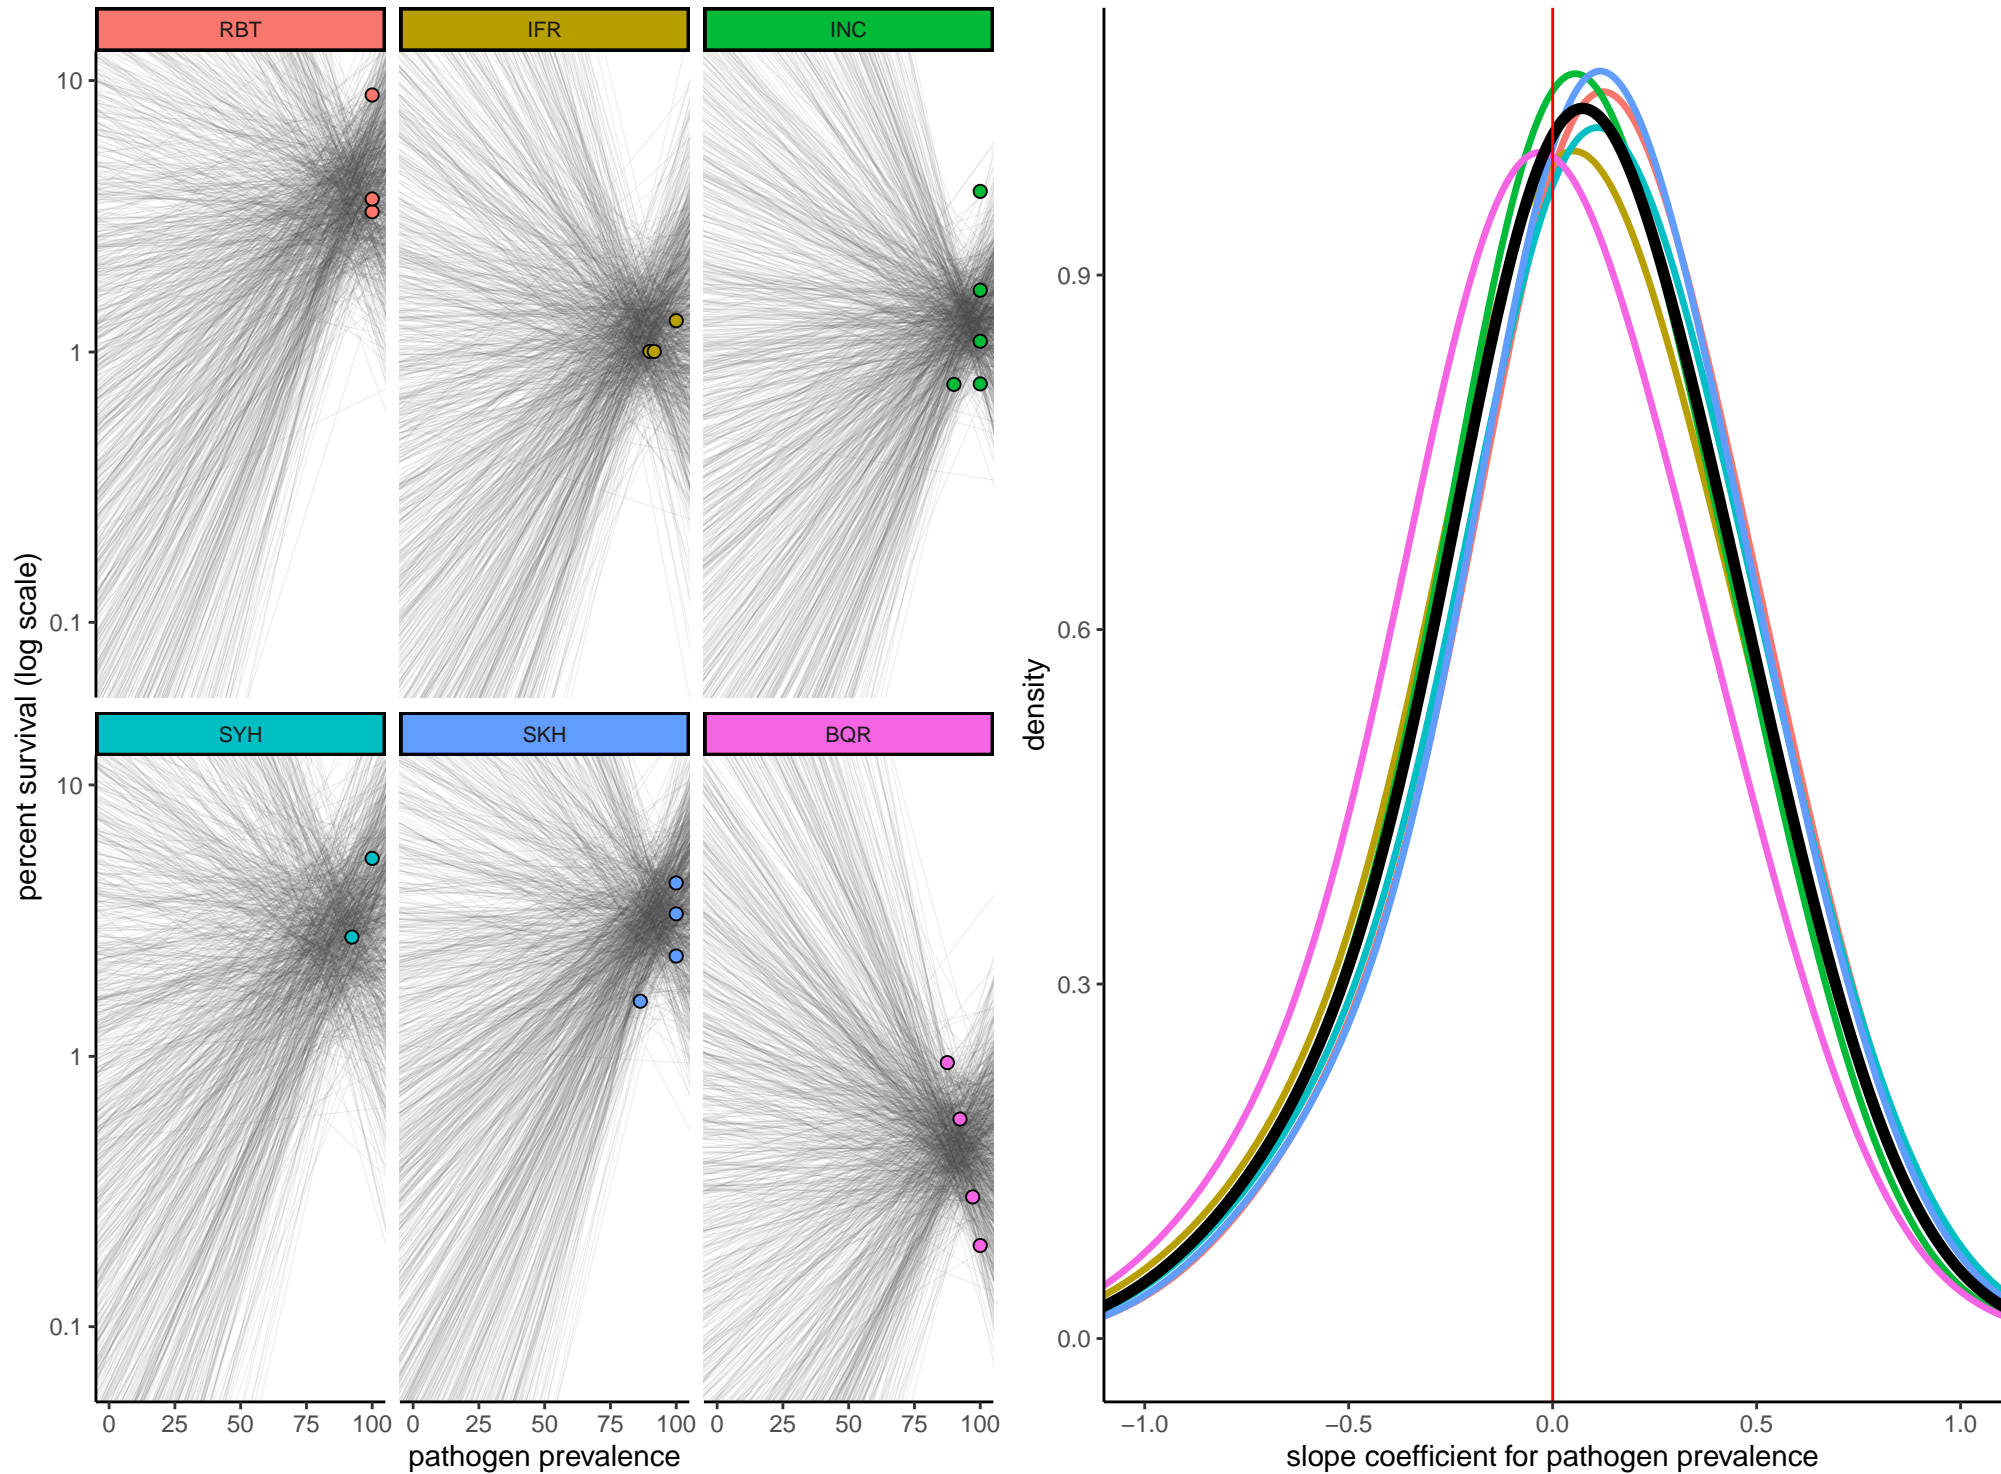



Ceratonova shasta SpSu

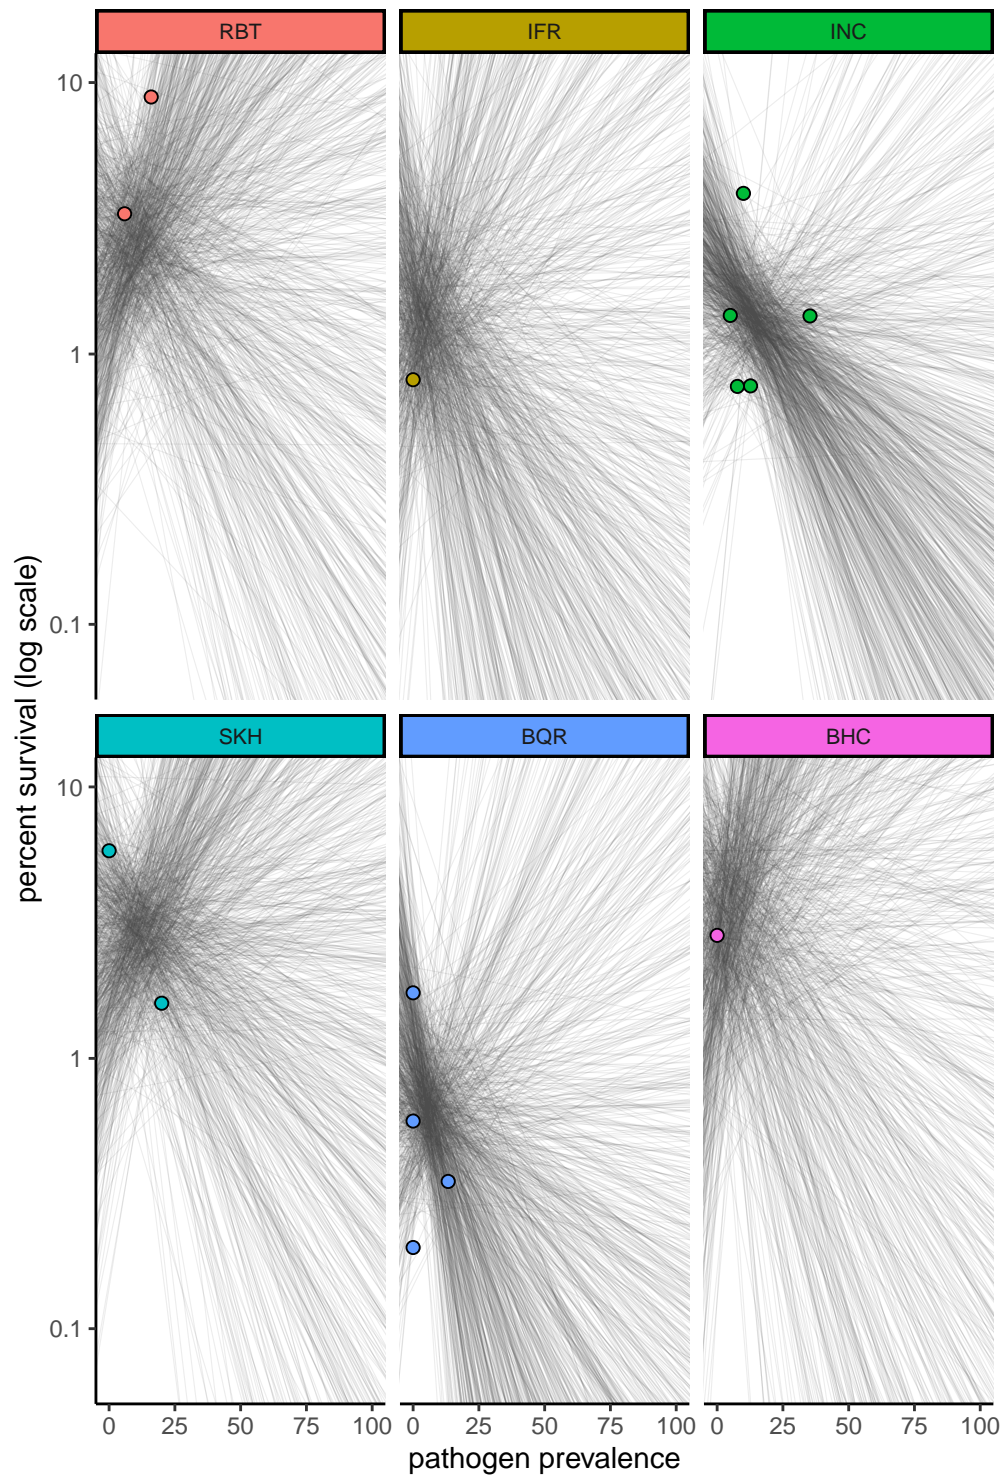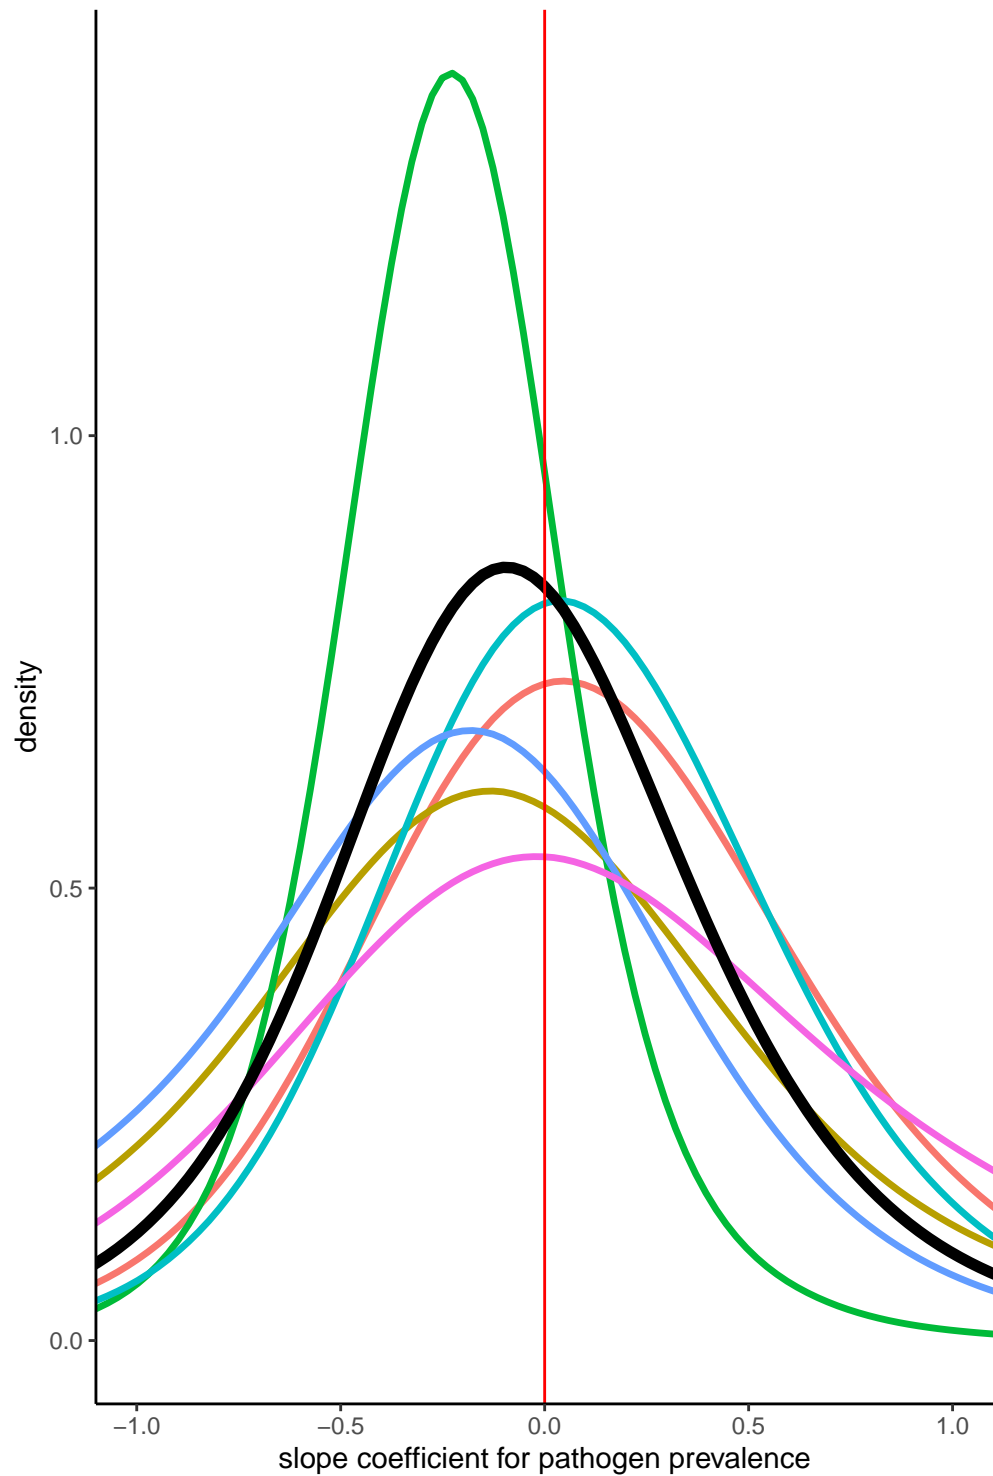

Ceratonova shasta FaWi

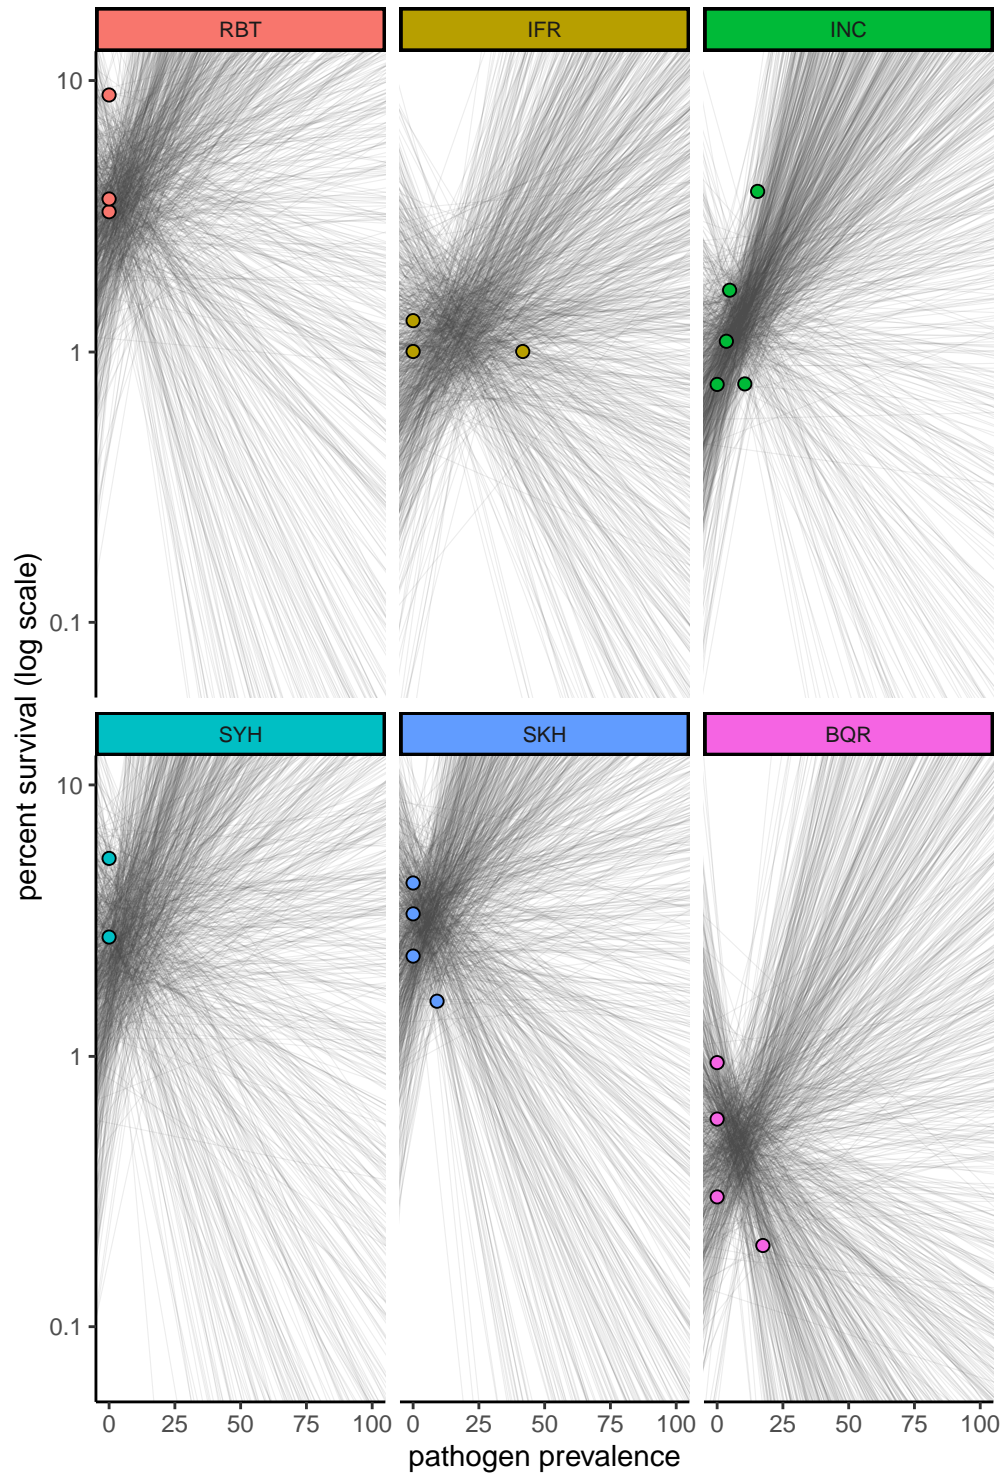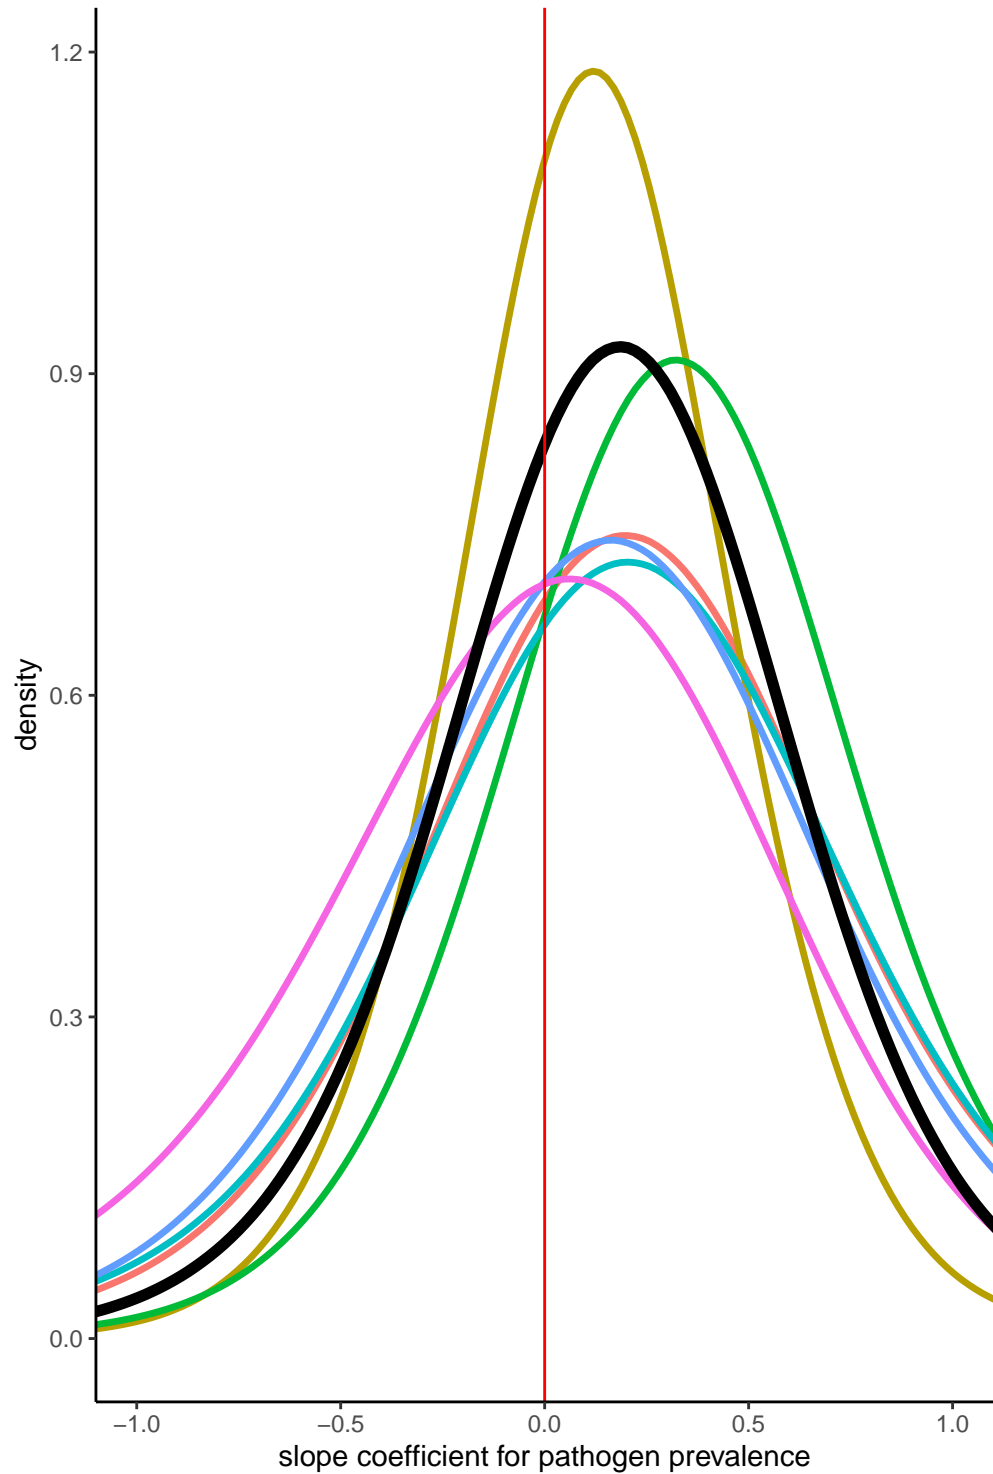



*Cryptobia salmositica* SpSu

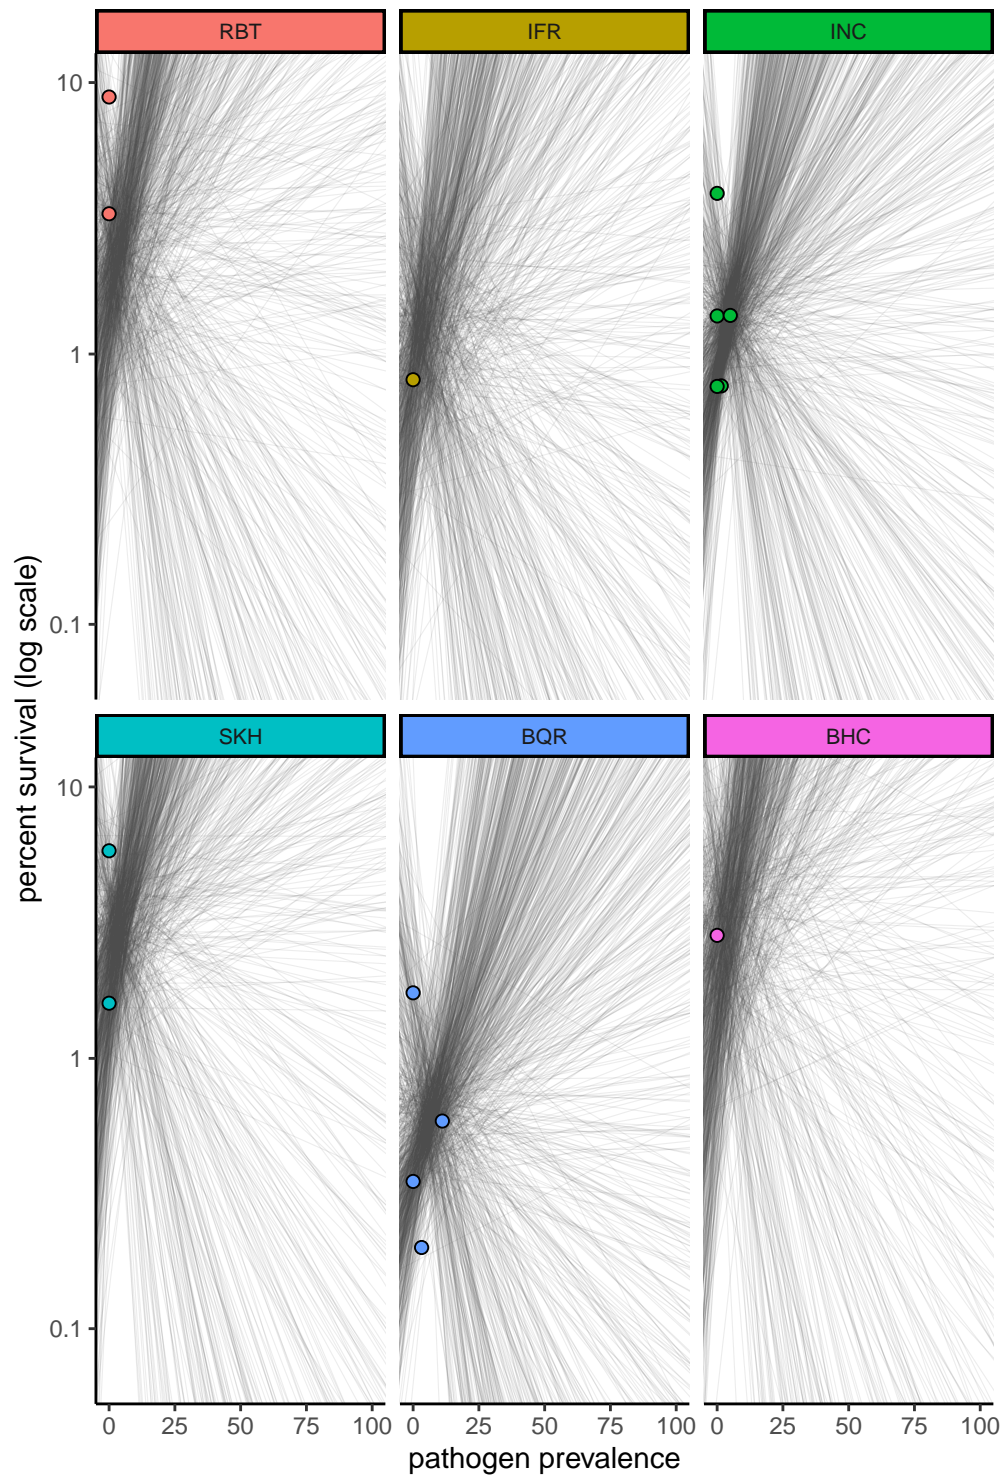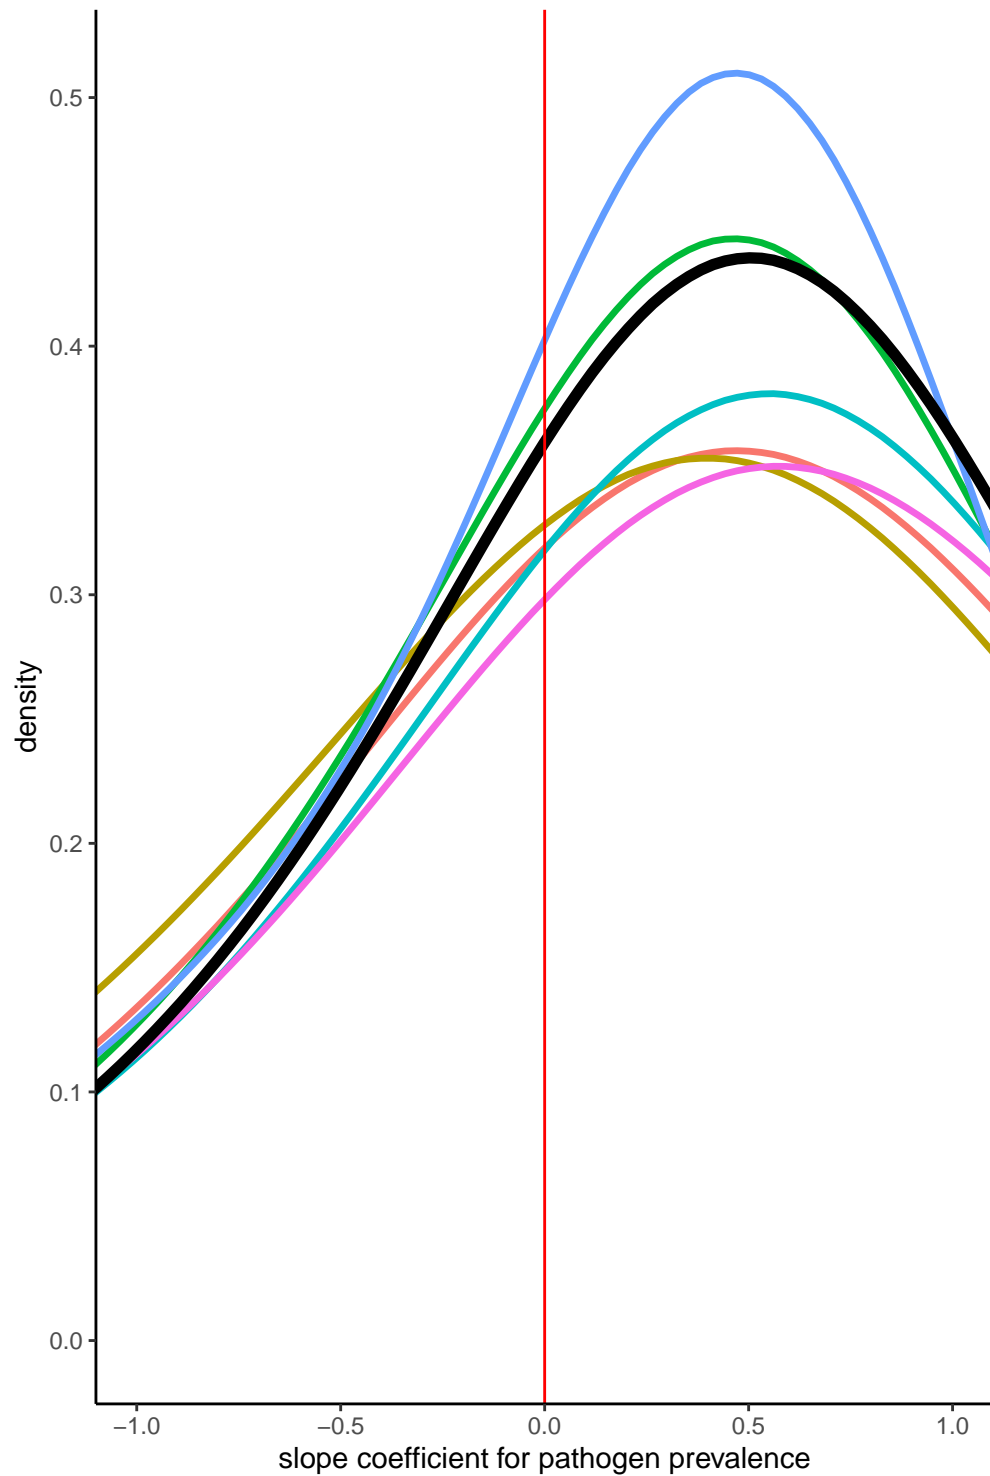

*Cryptobia salmositica* FaWi

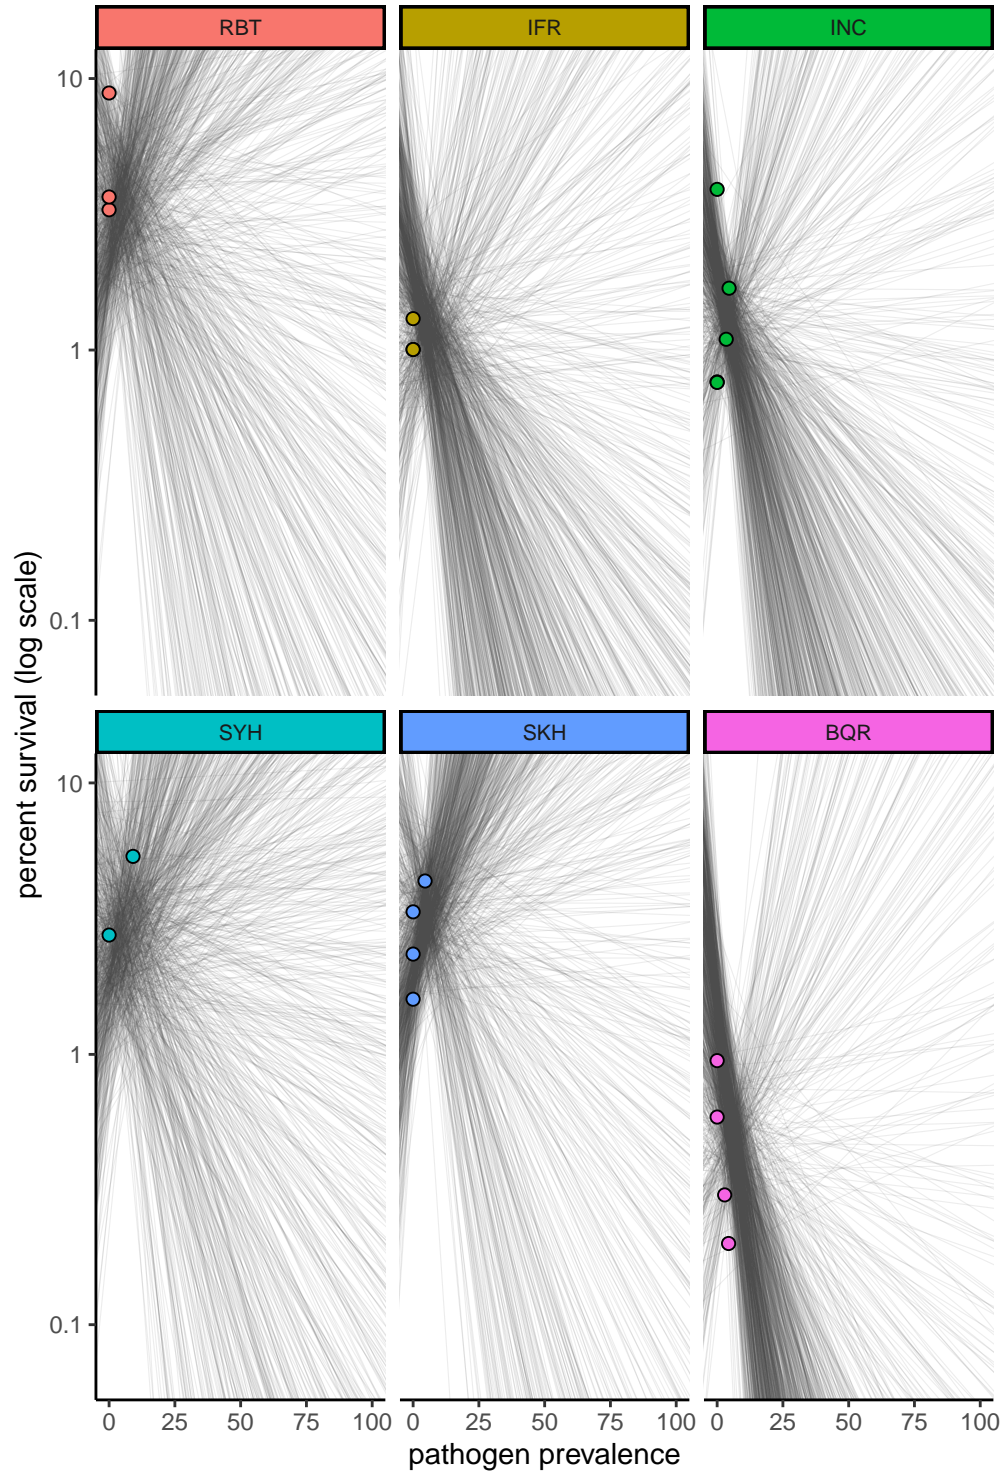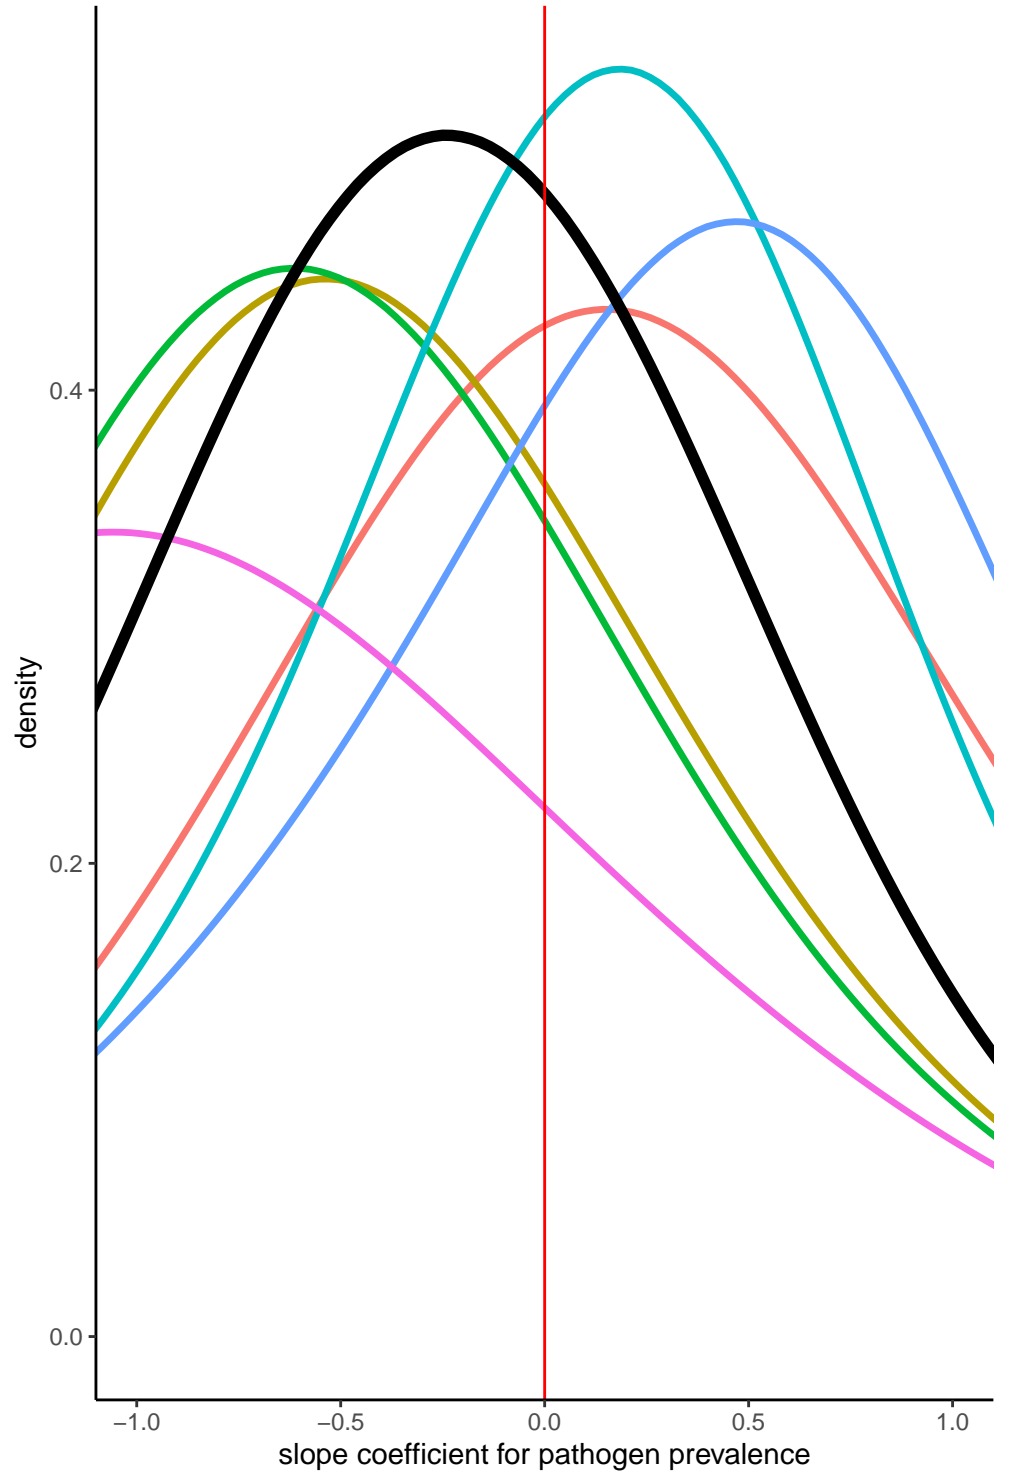



Facilispora margolisi SpSu

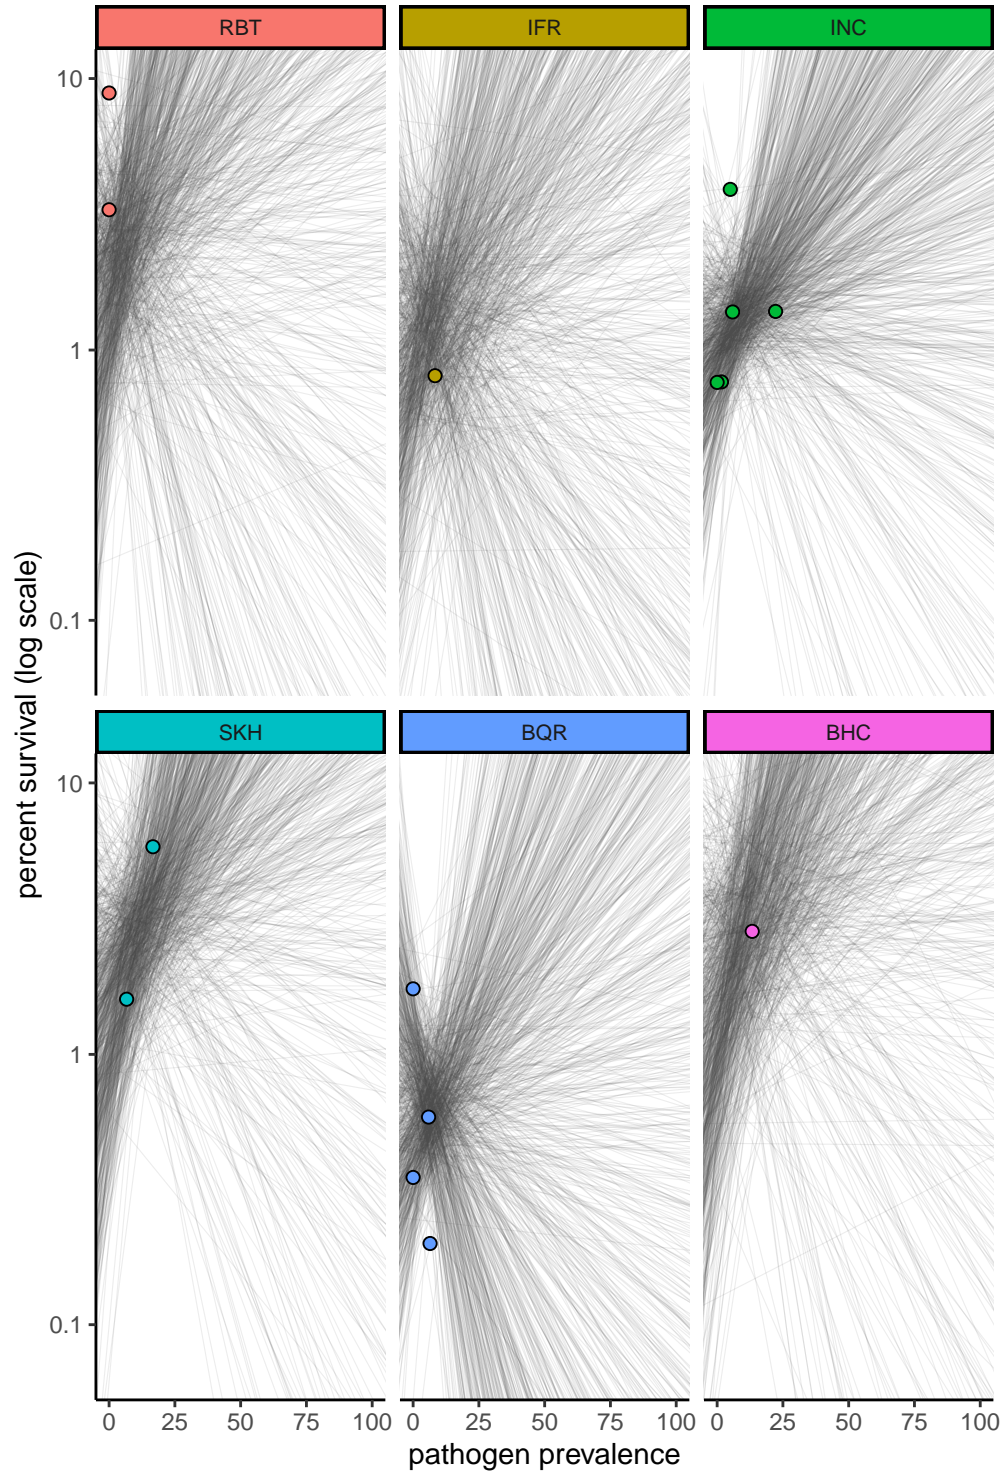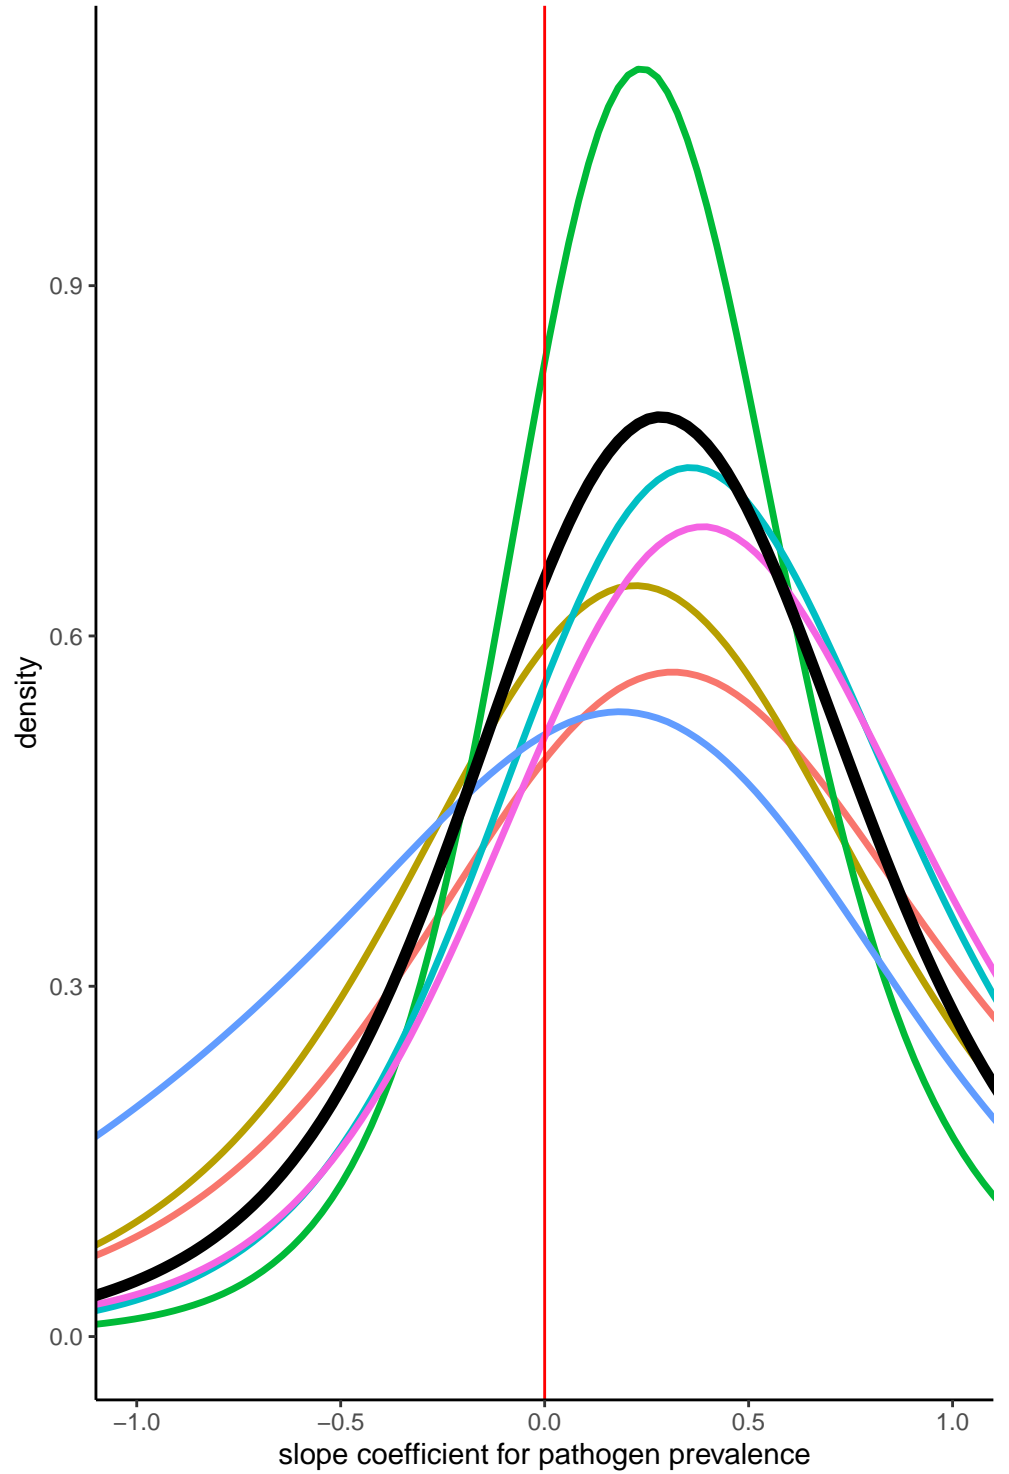



Facilispora margolisi FaWi

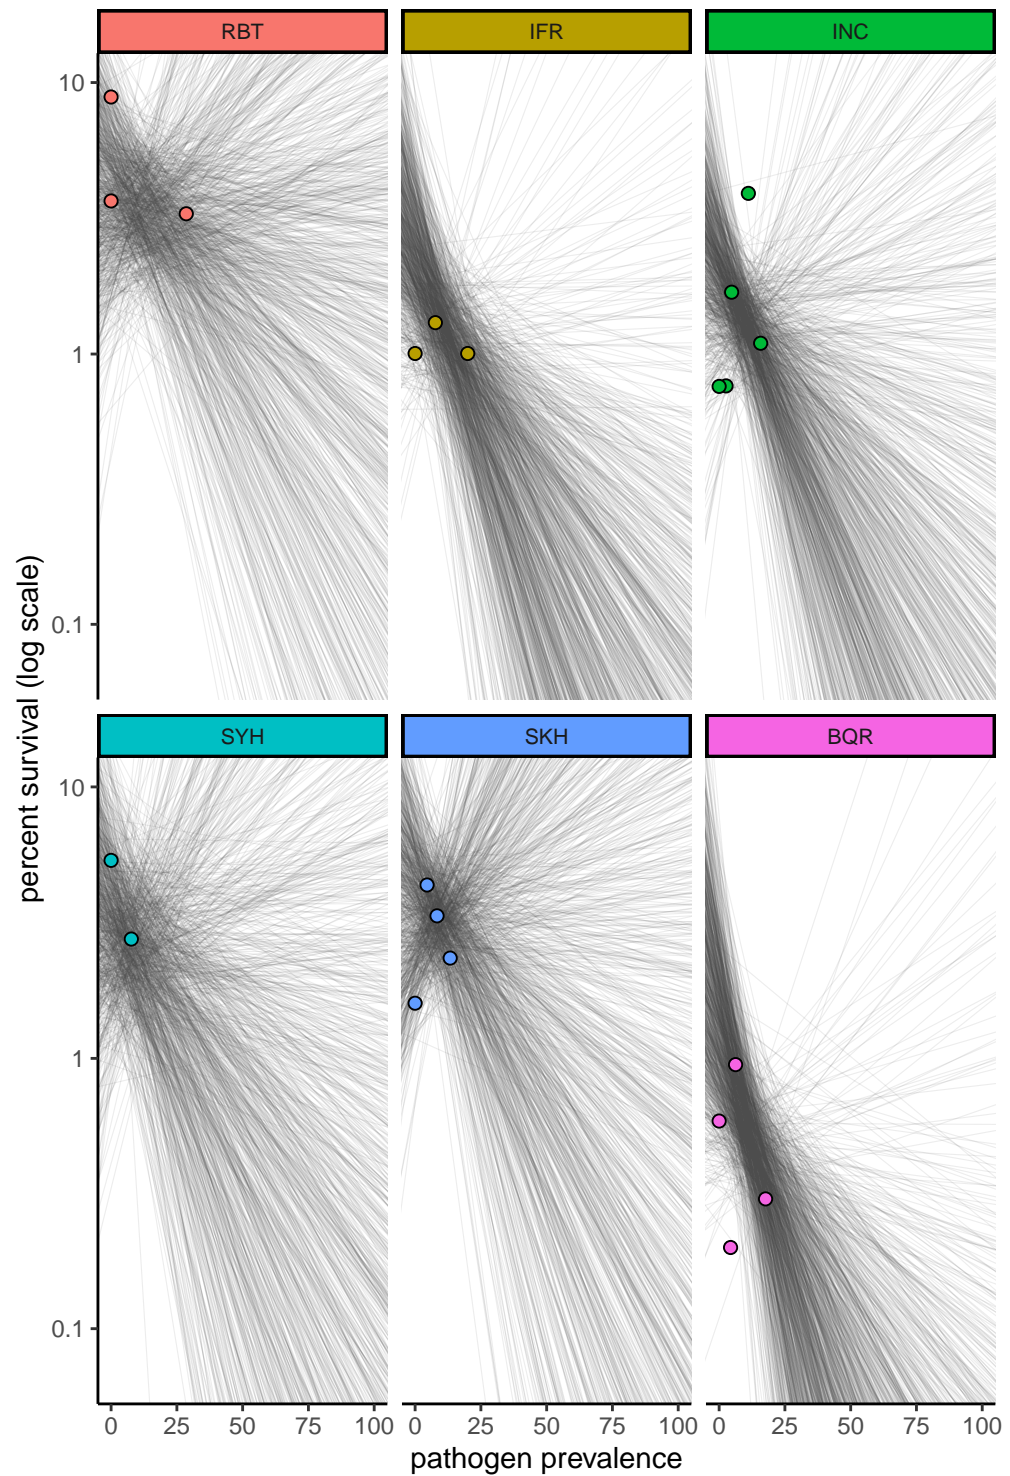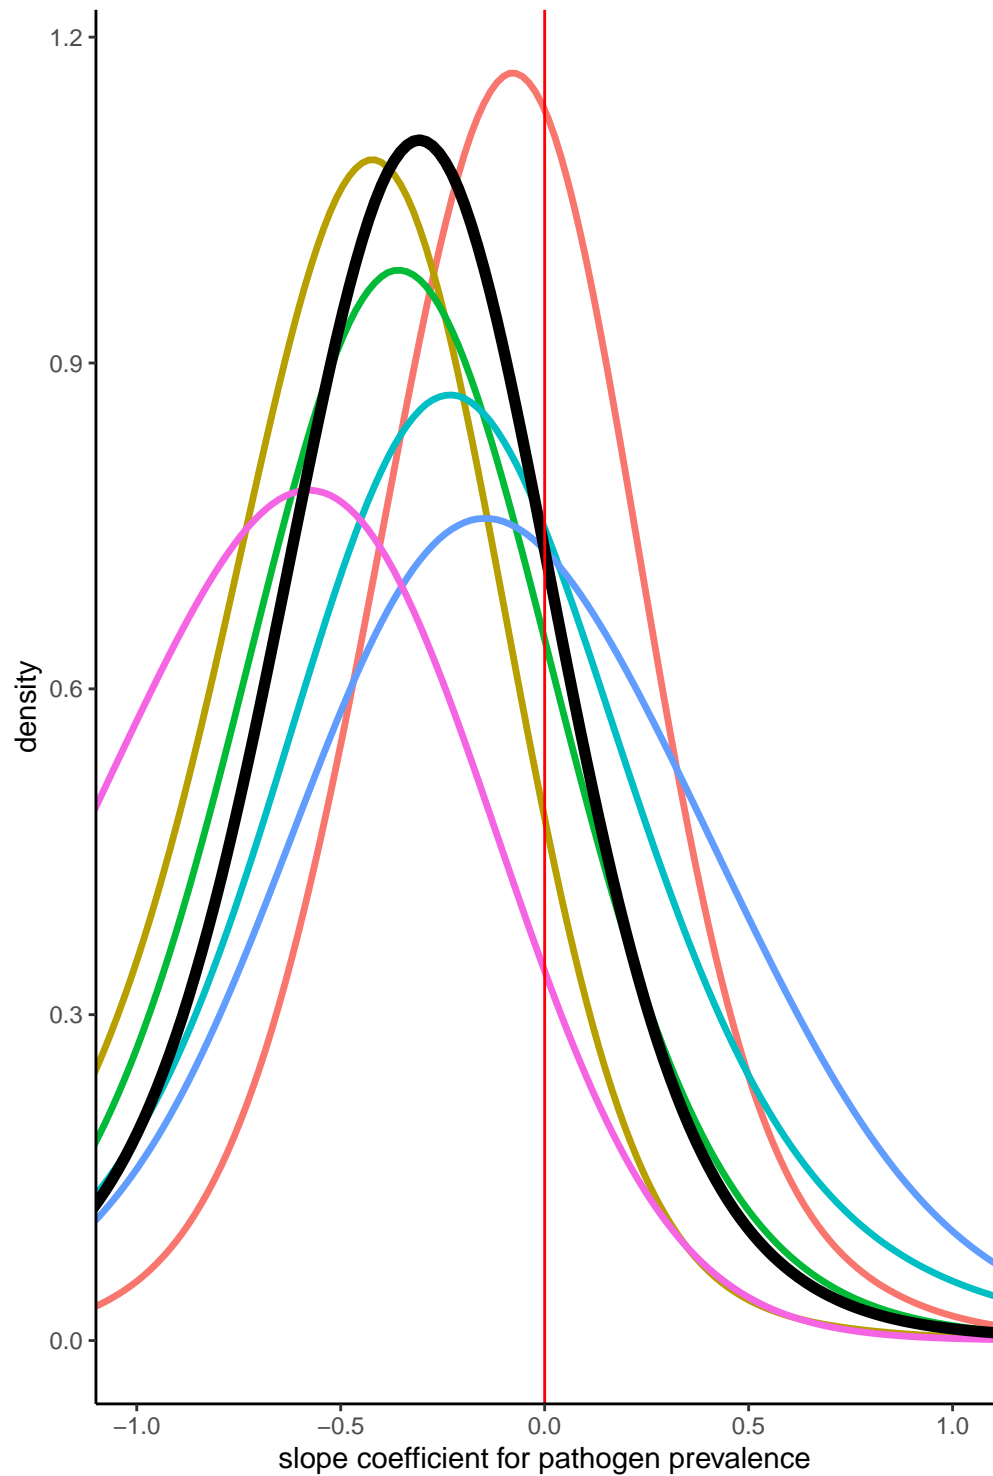

Flavobacterium psychrophilum SpSu

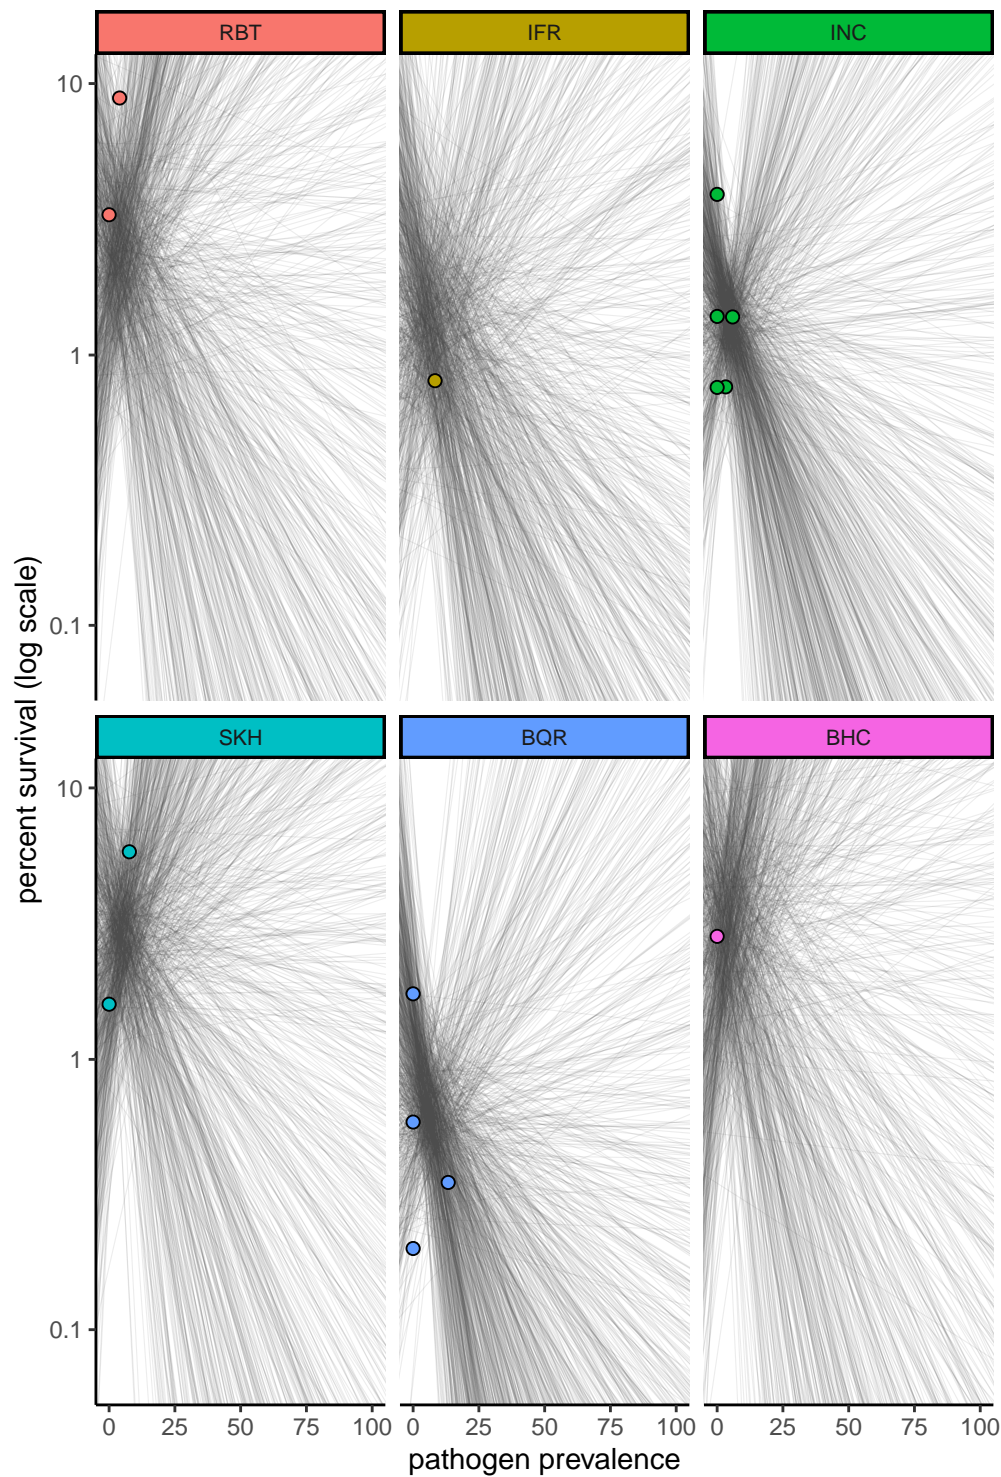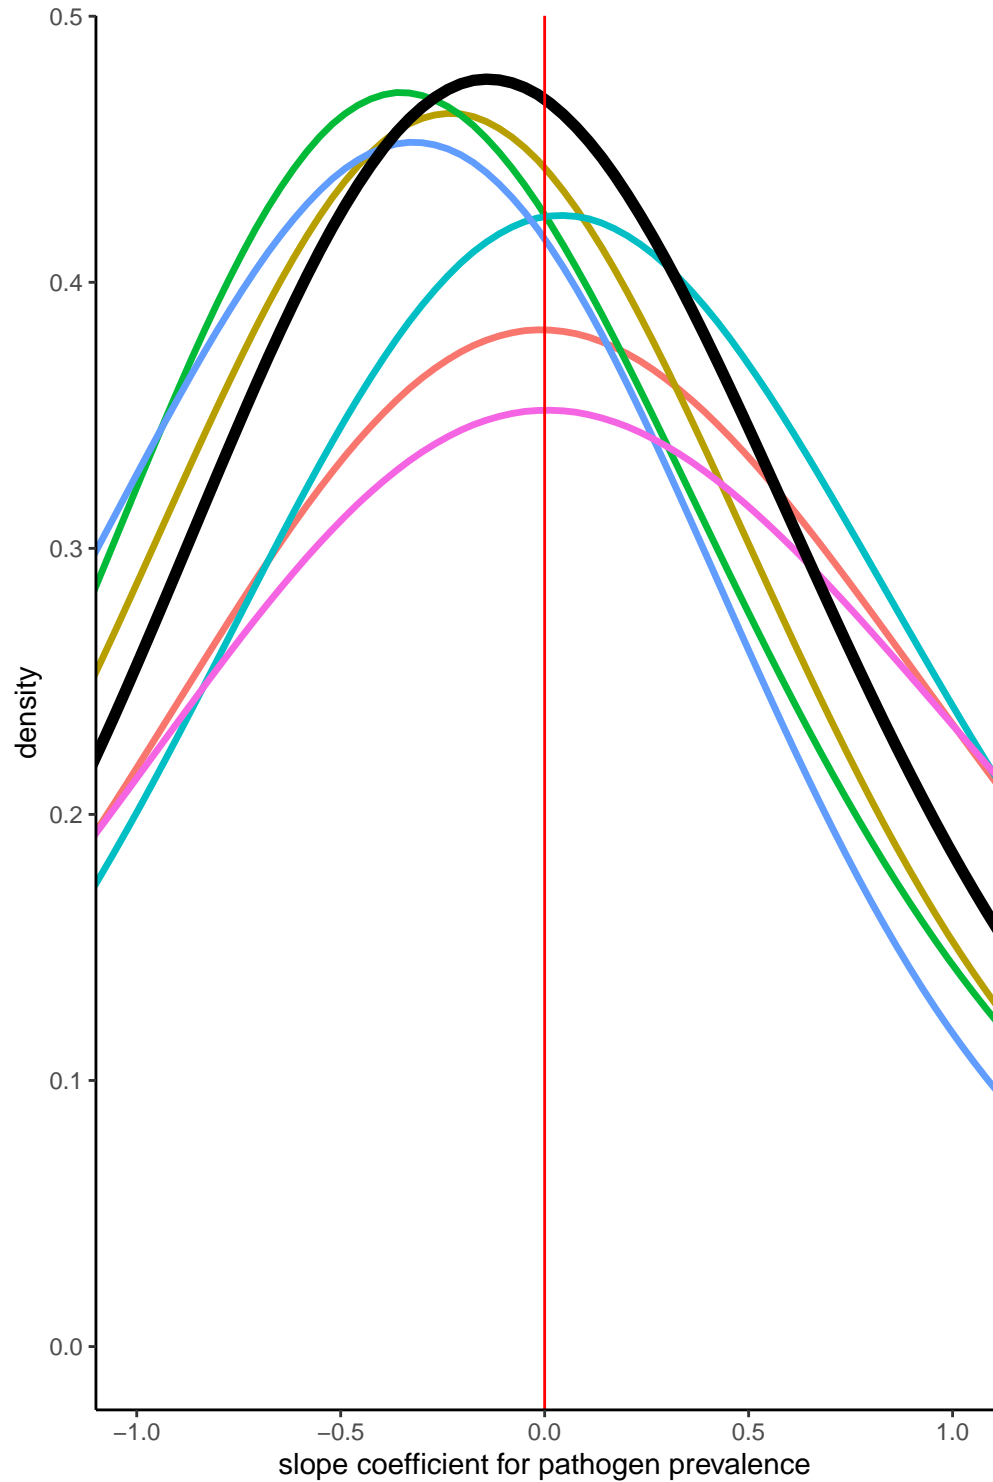



Flavobacterium psychrophilum FaWi

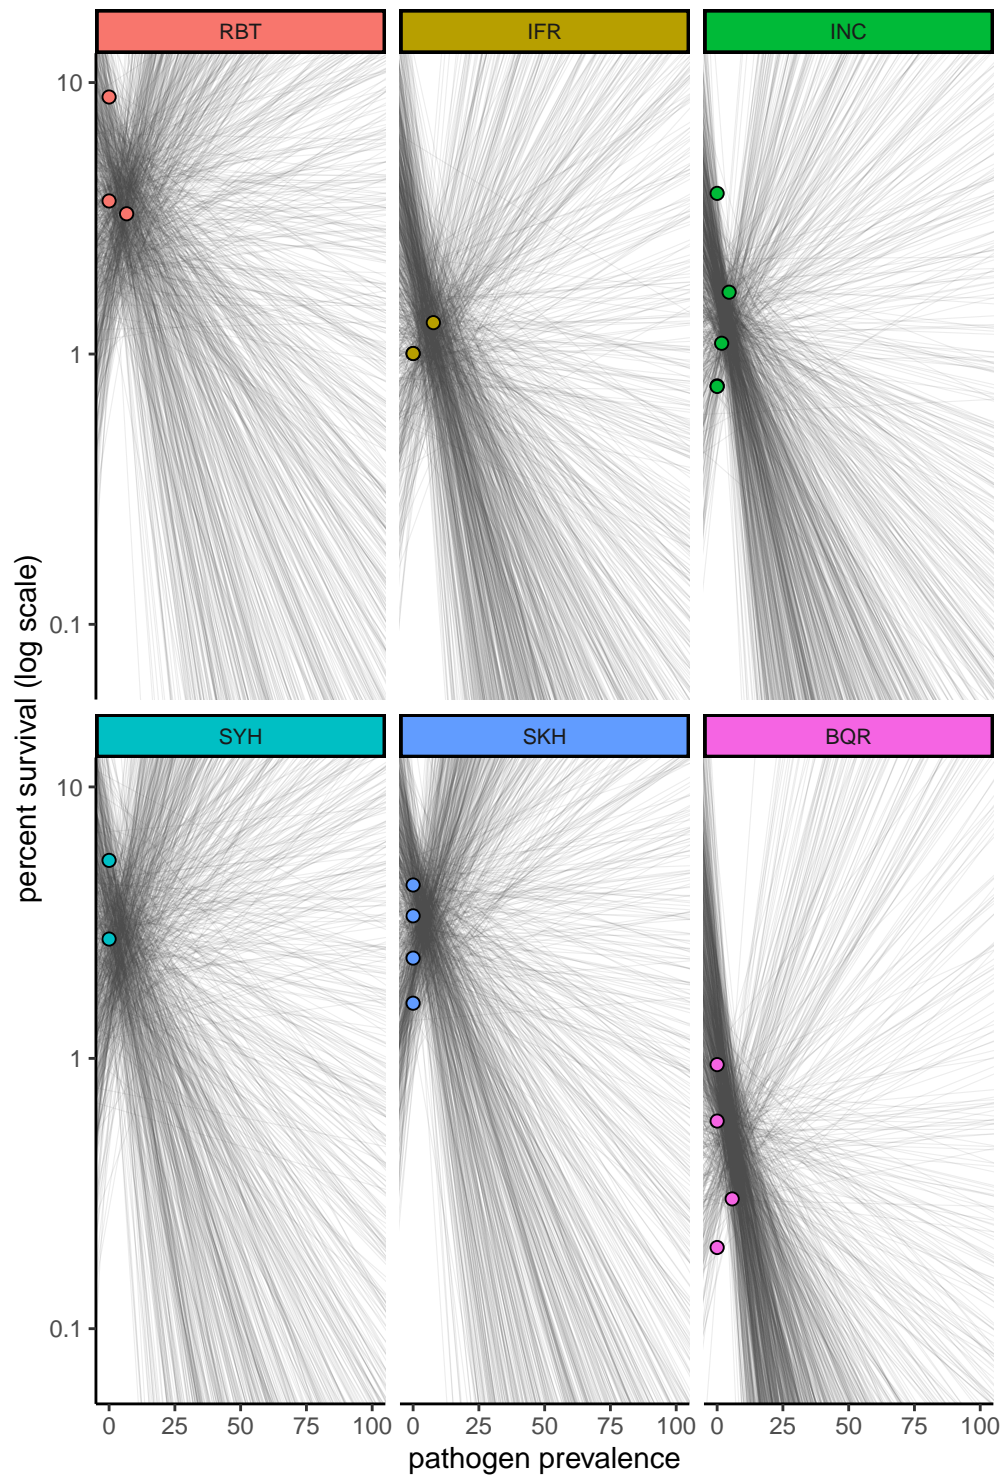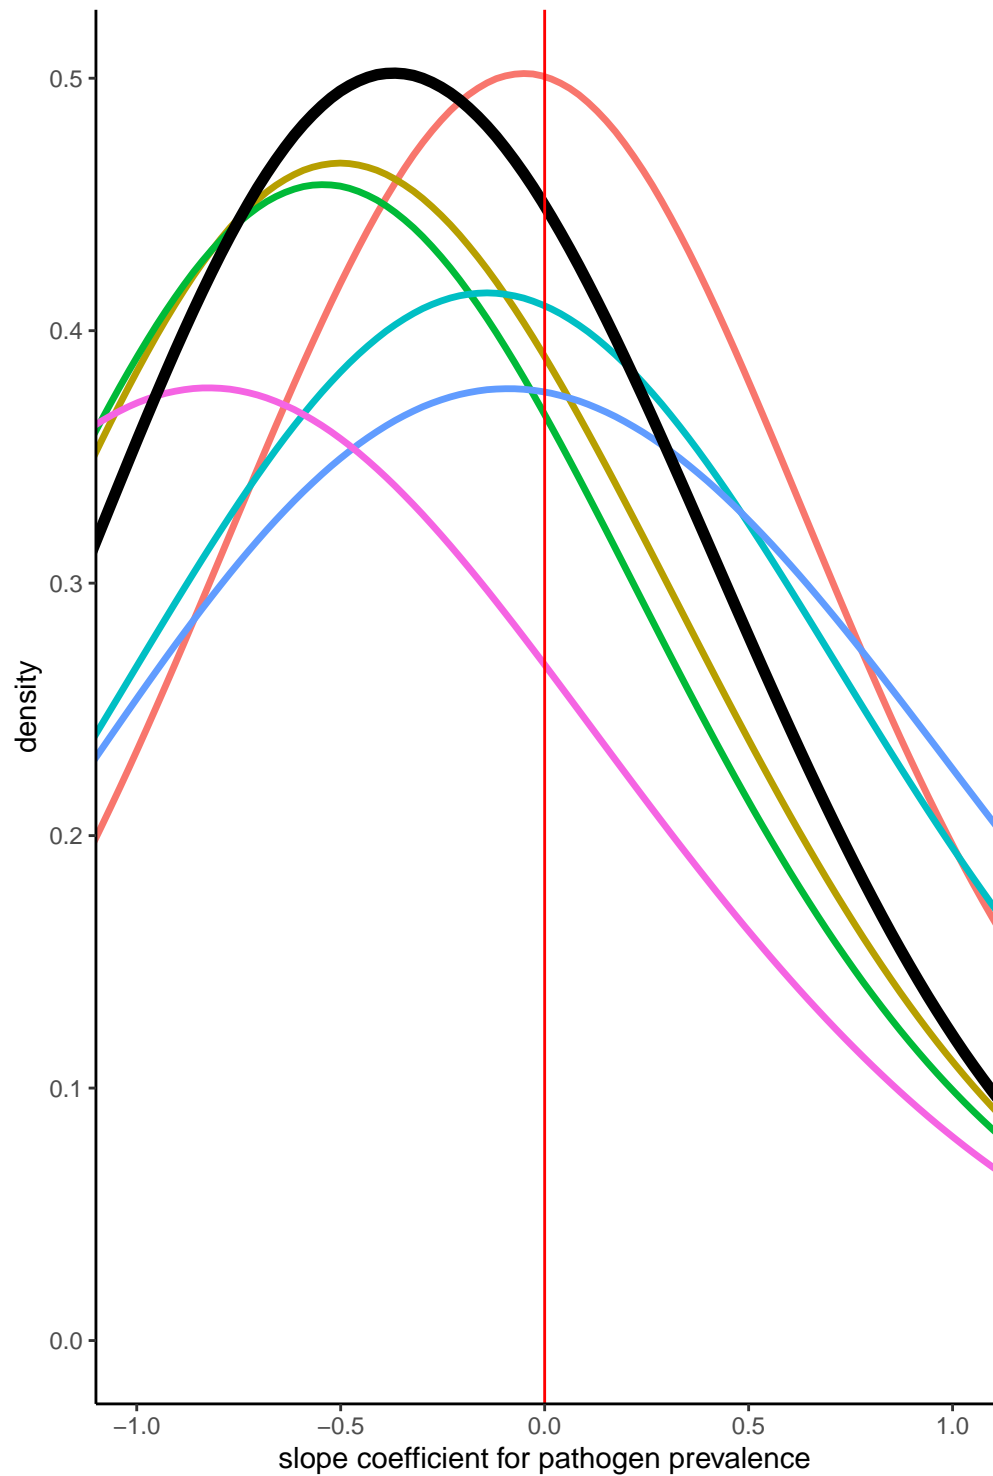

Ichthyophonus hoferi SpSu

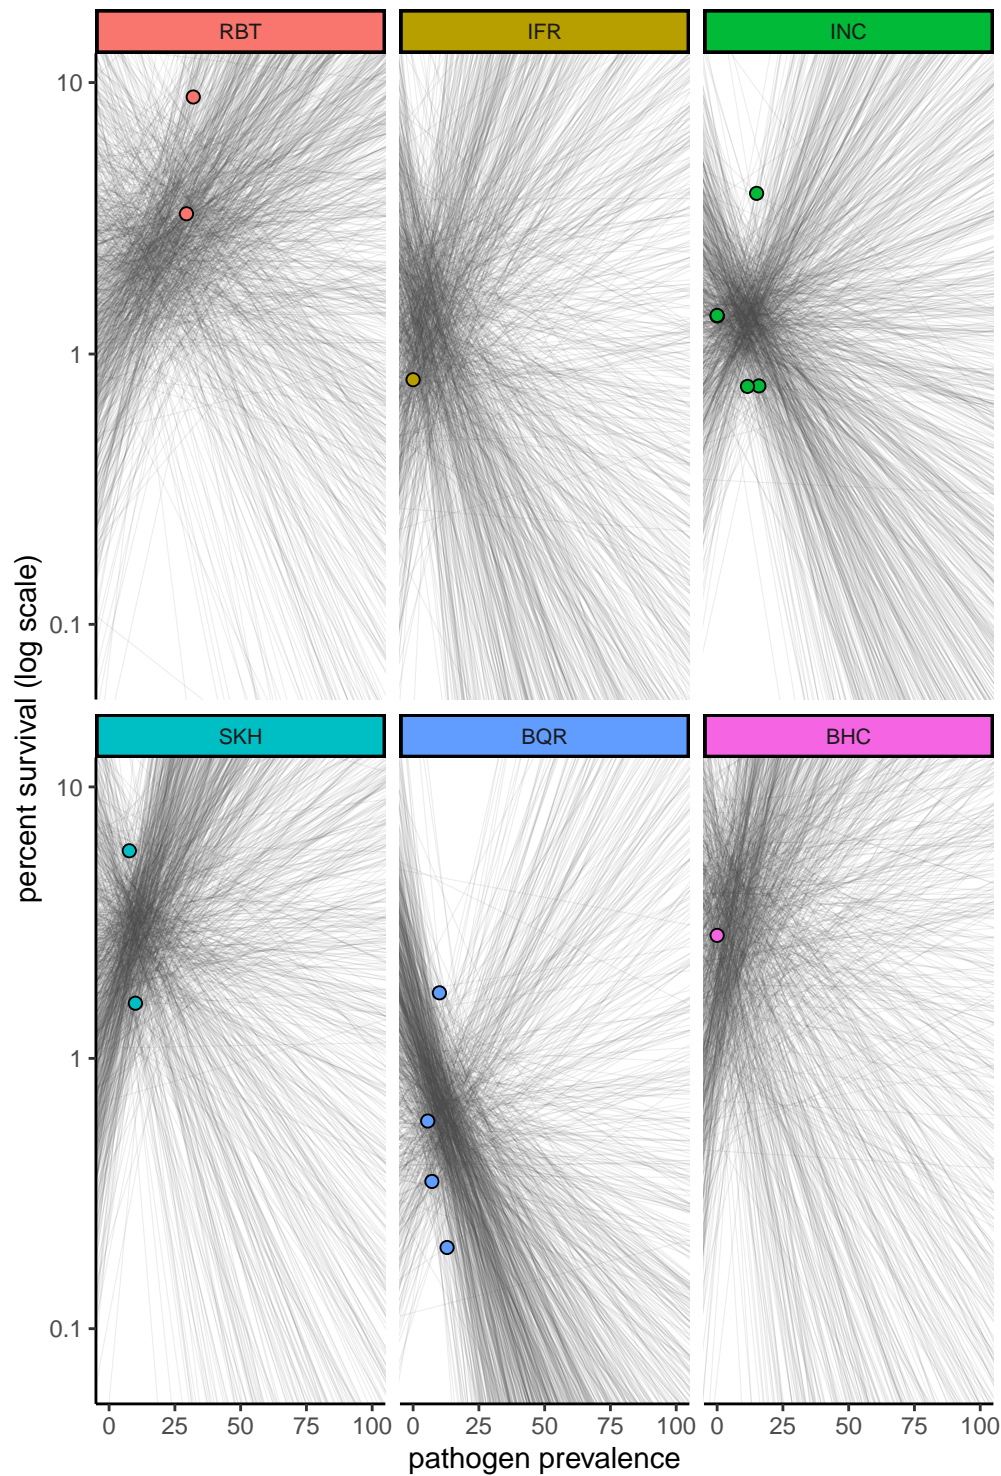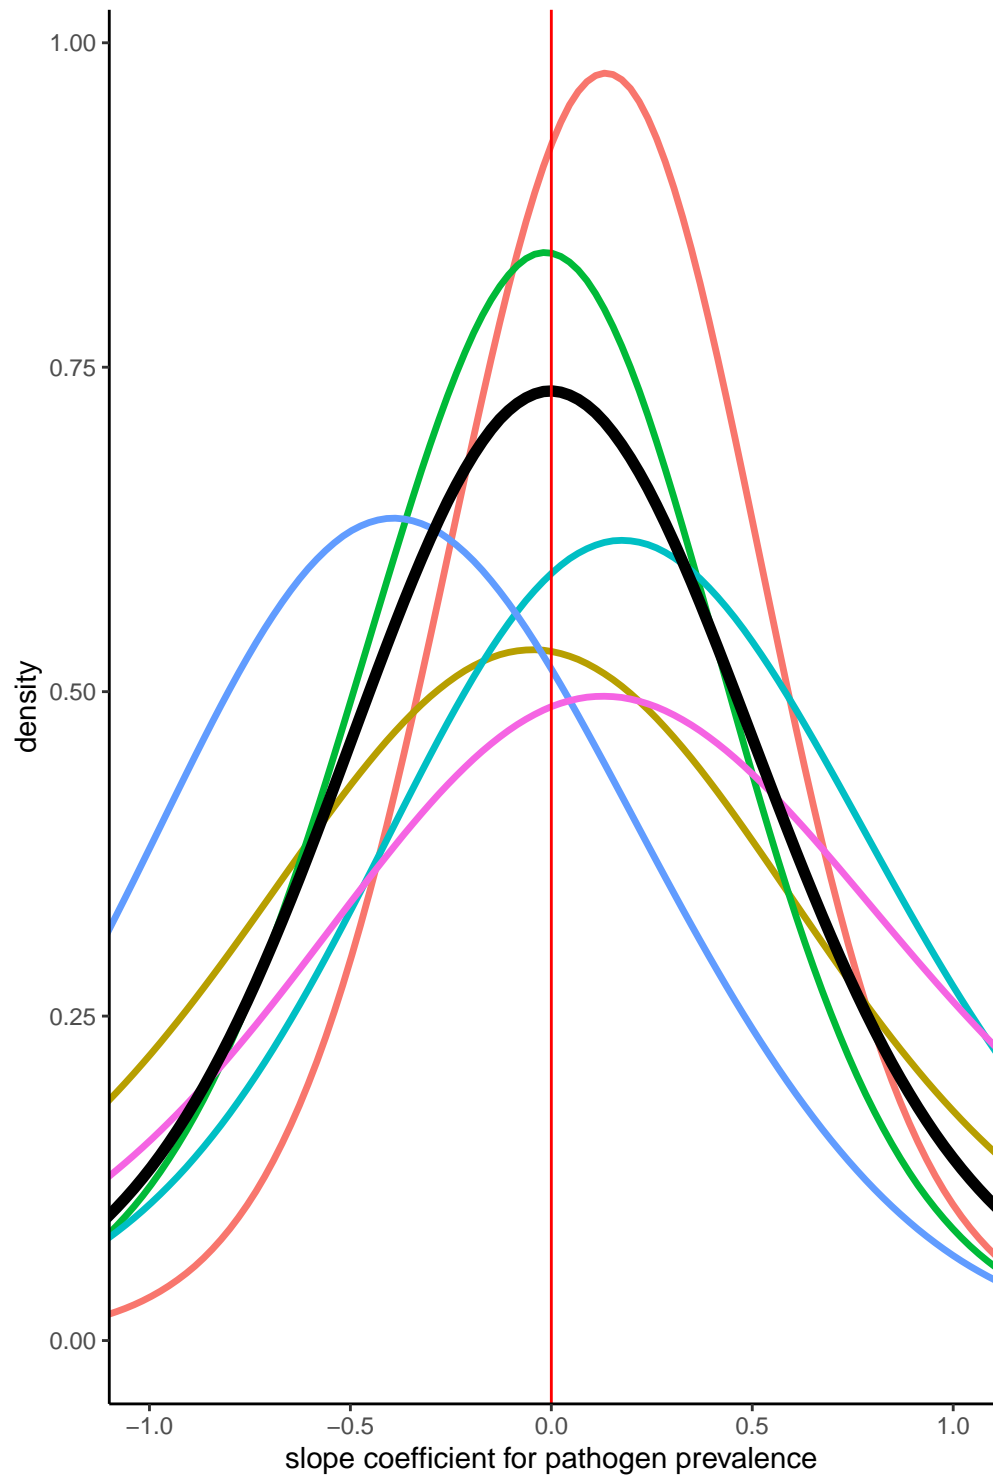



Ichthyophonus hoferi FaWi

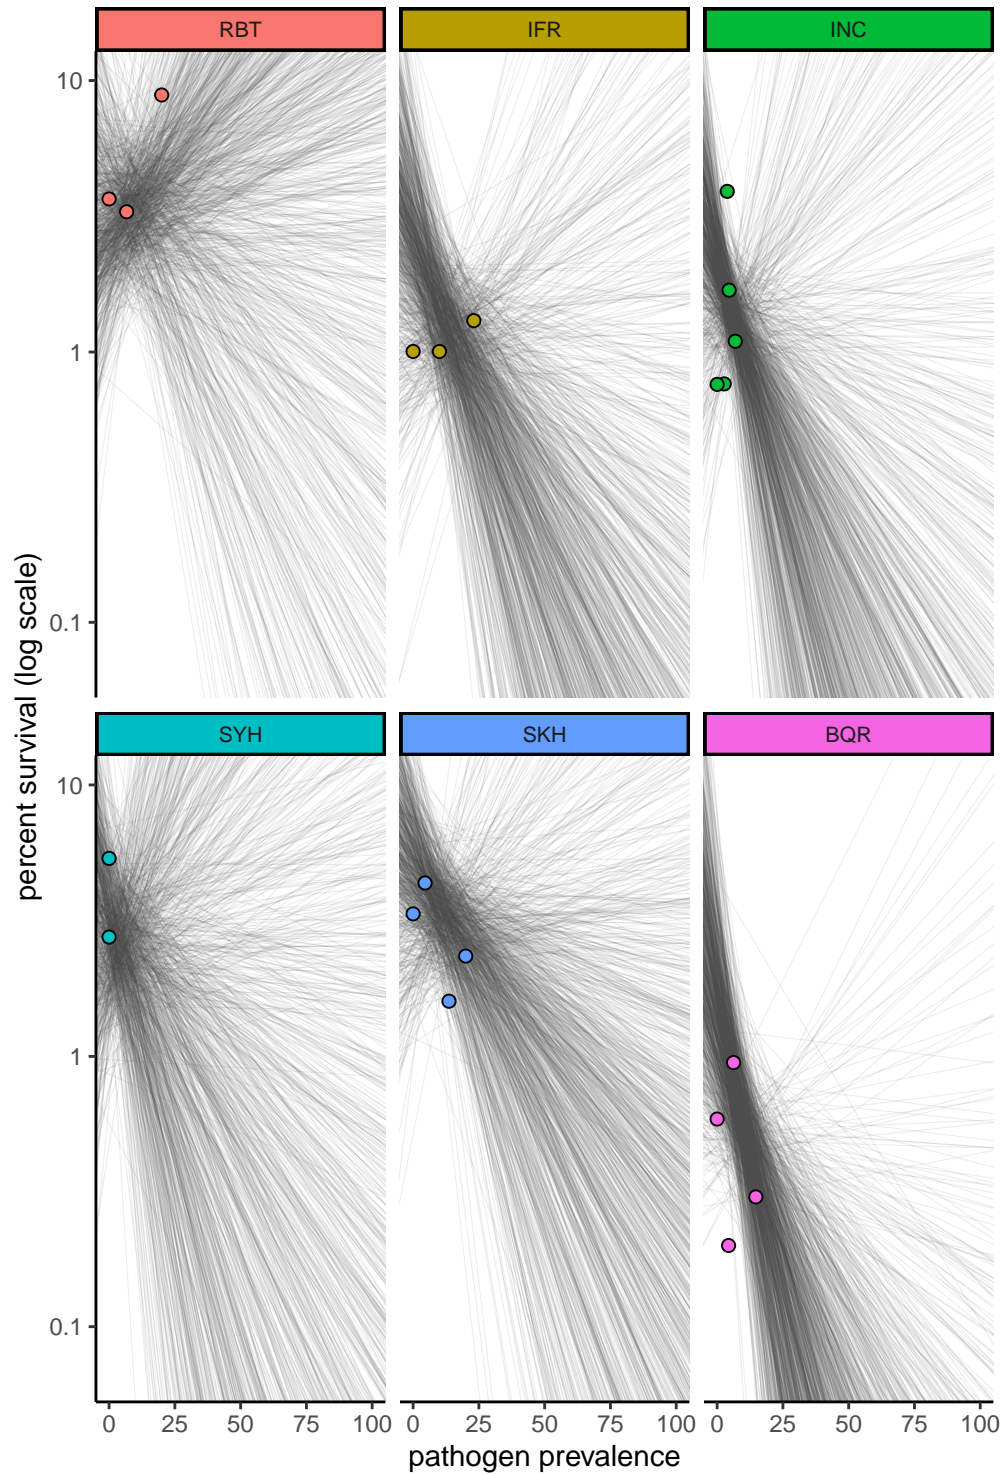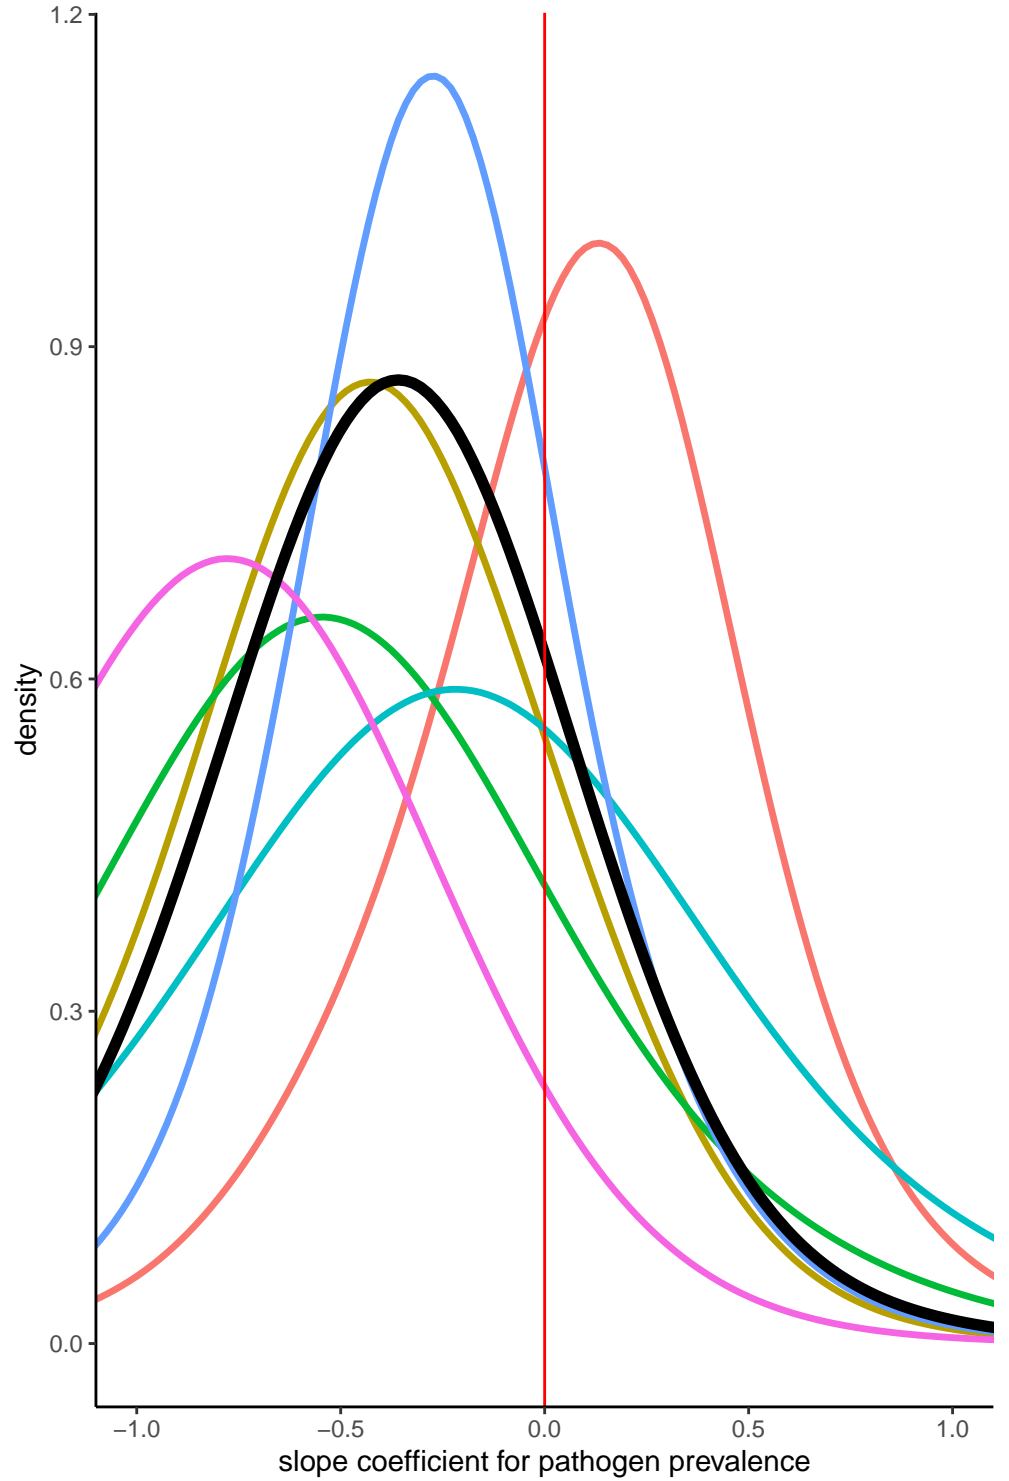

Ichthyophthirius multifiliis SpSu

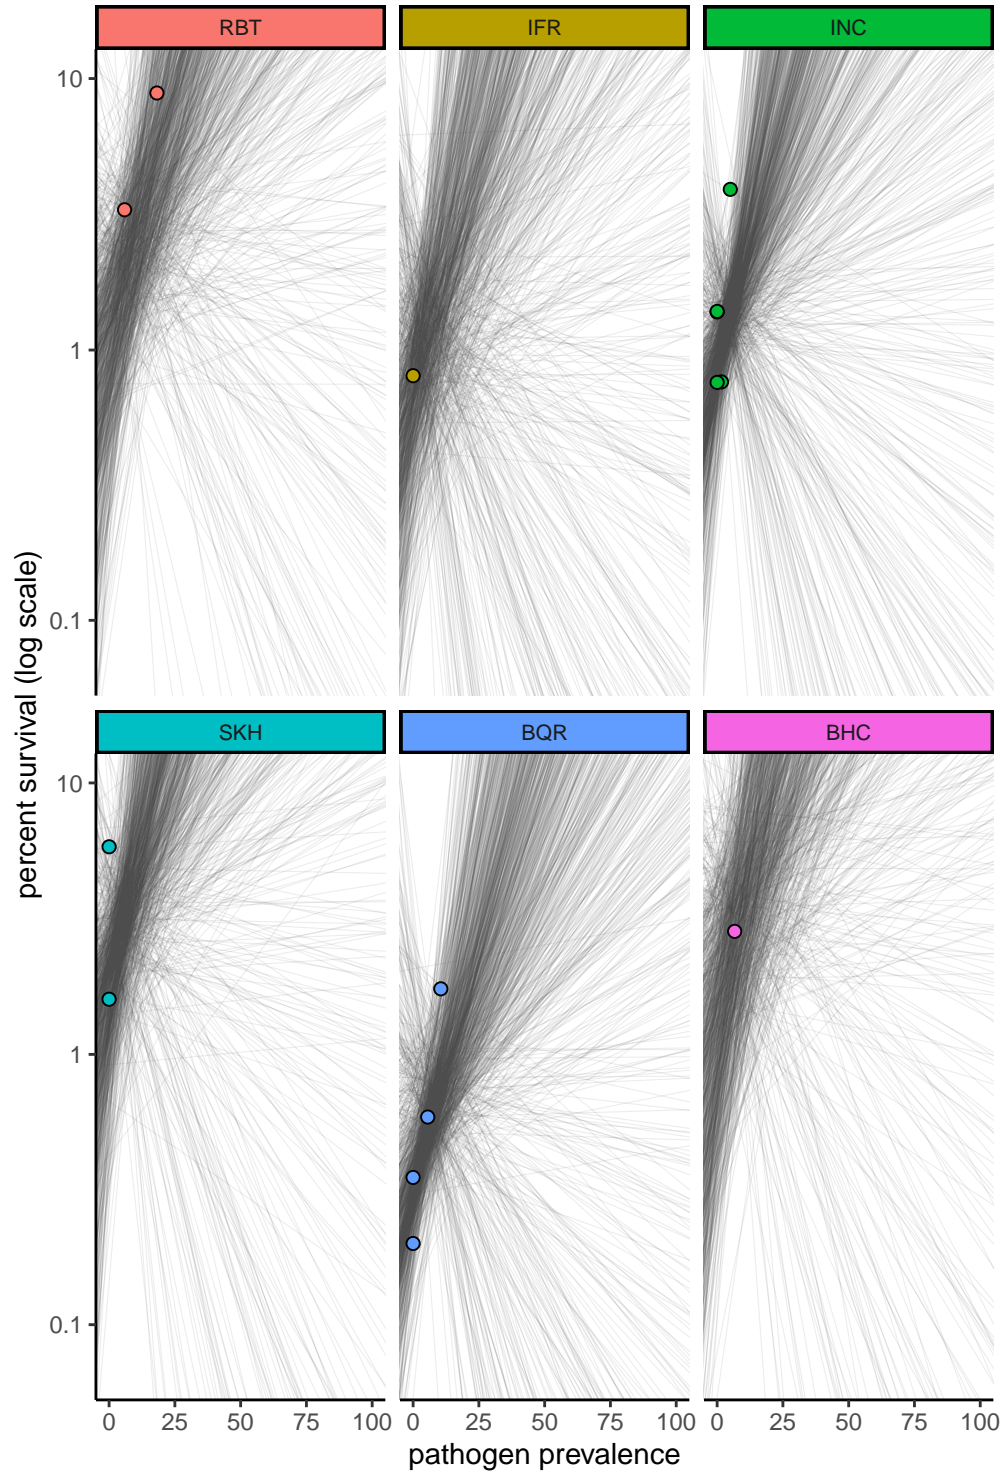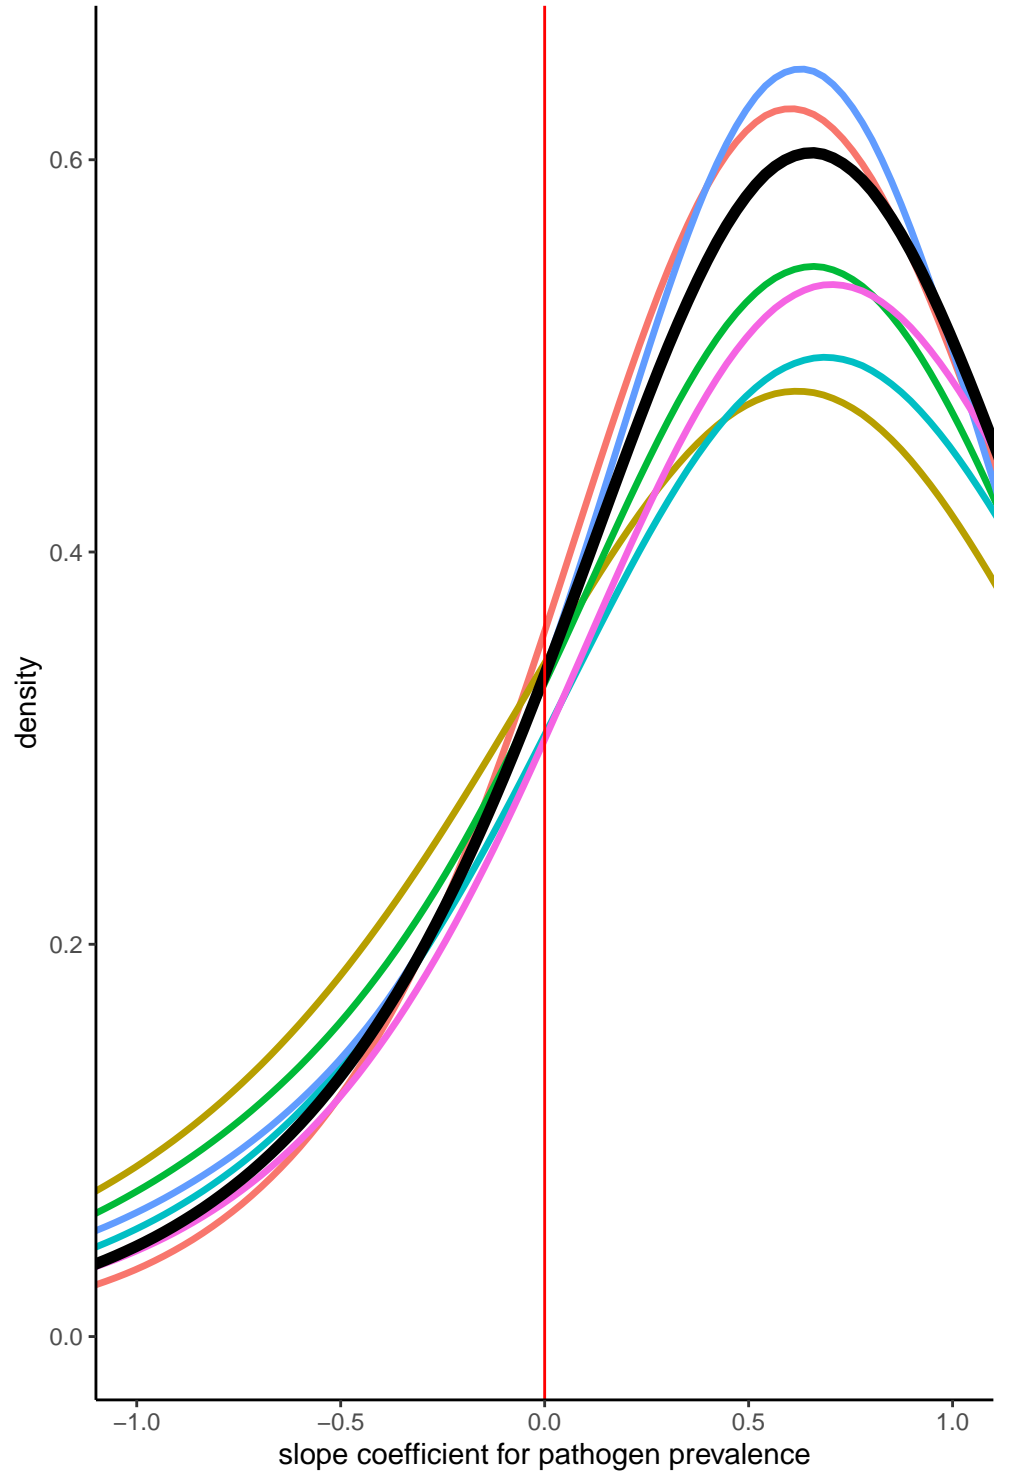



Ichthyophthirius multifiliis FaWi

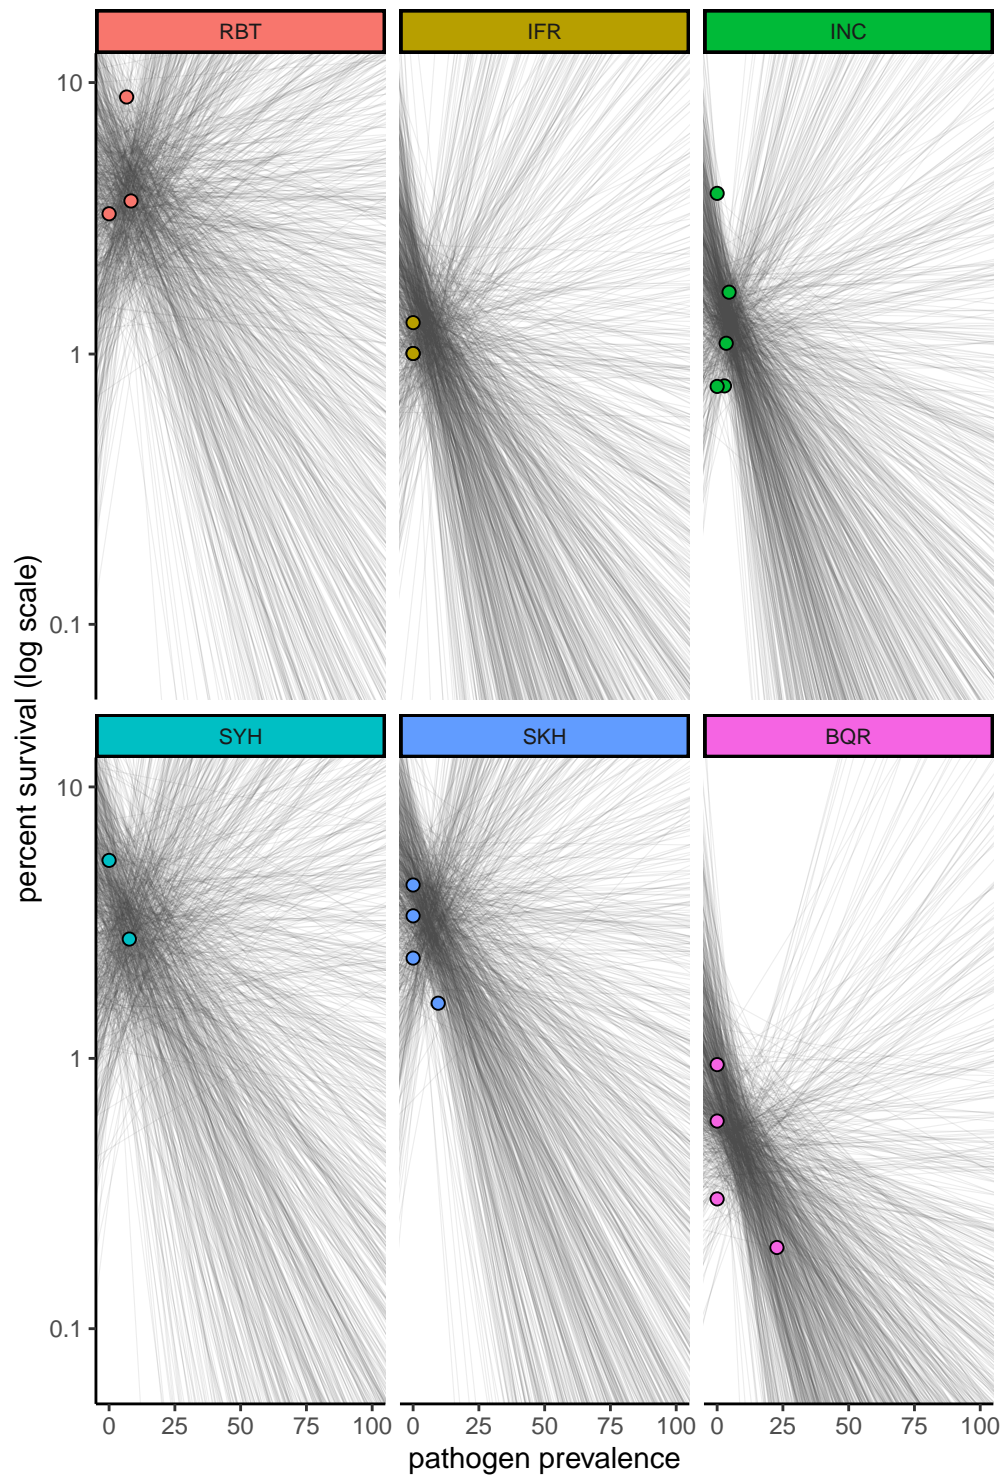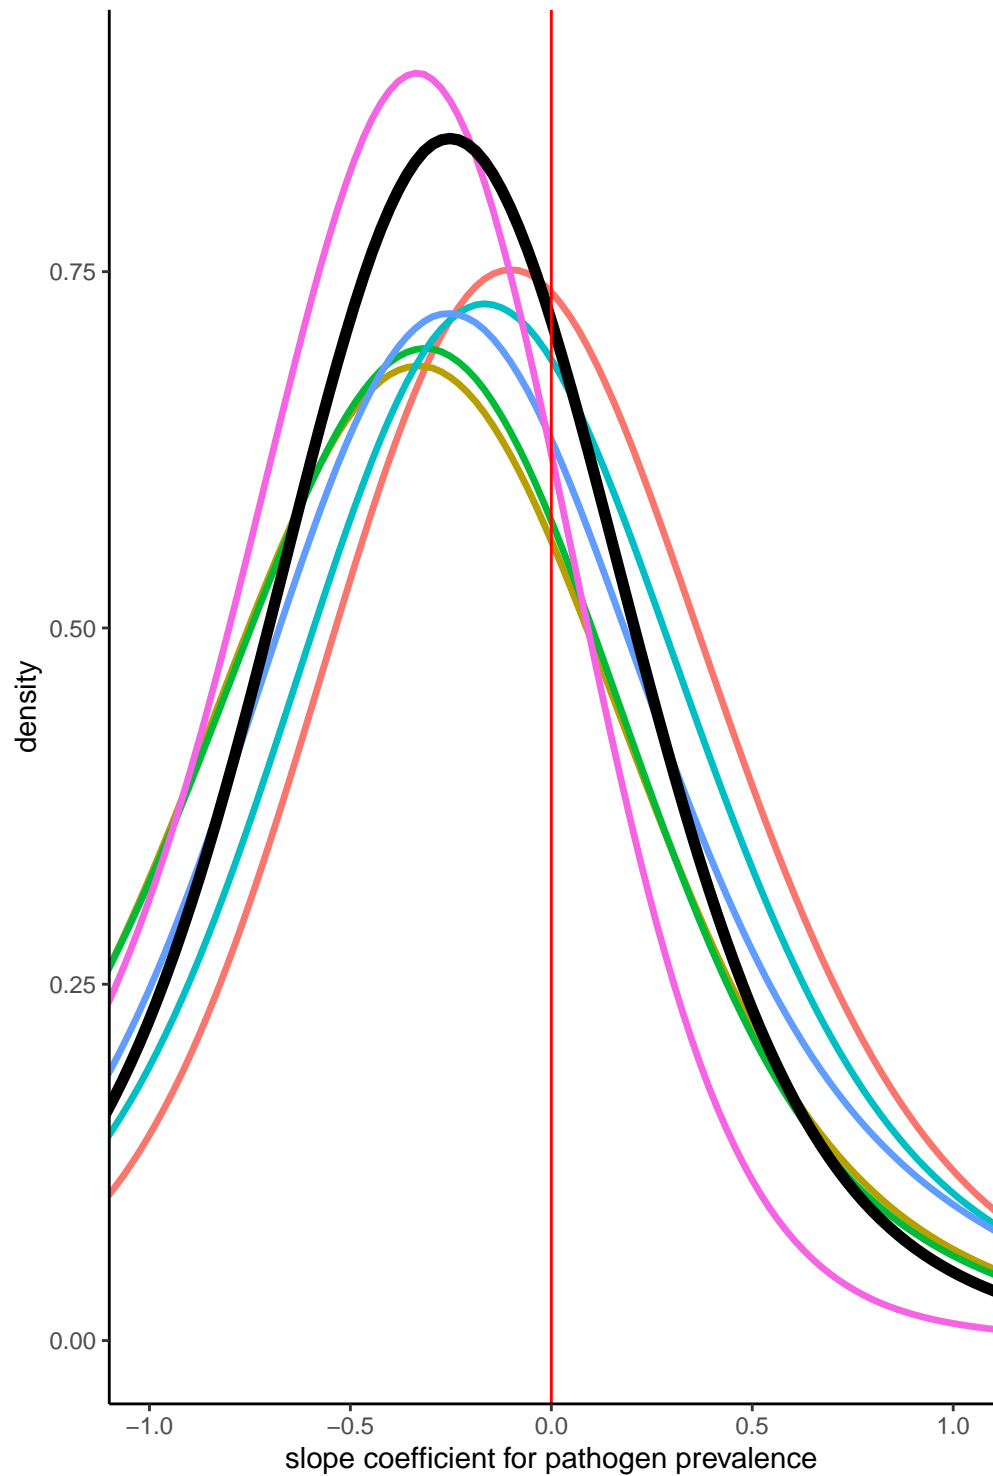

Kudoa thyrsites SpSu

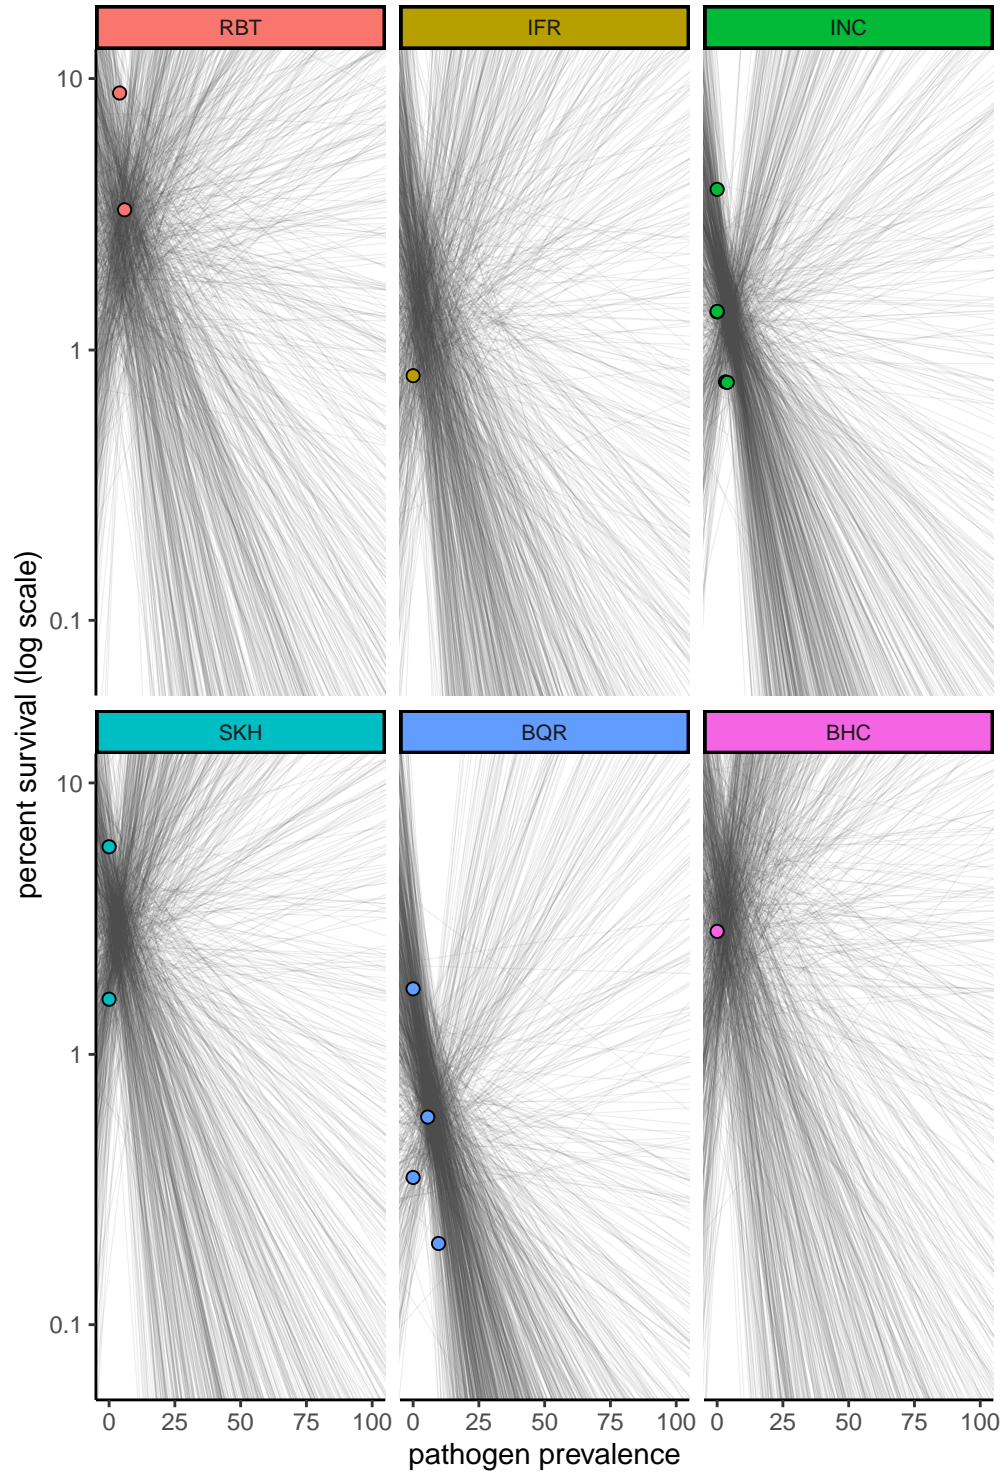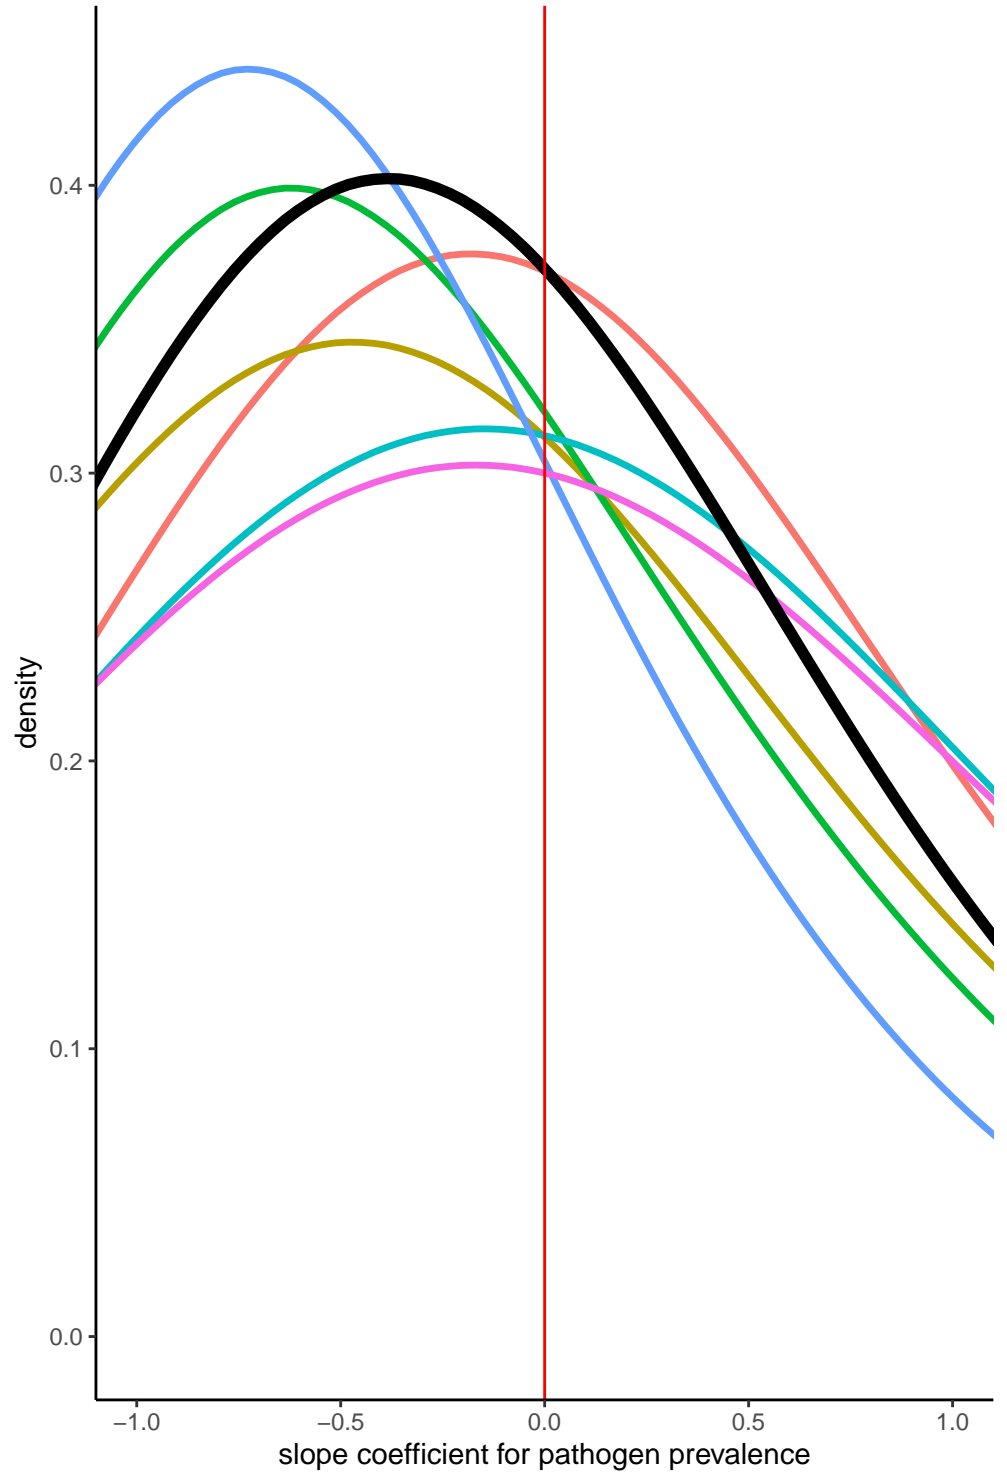



Kudoa thyrsites FaWi

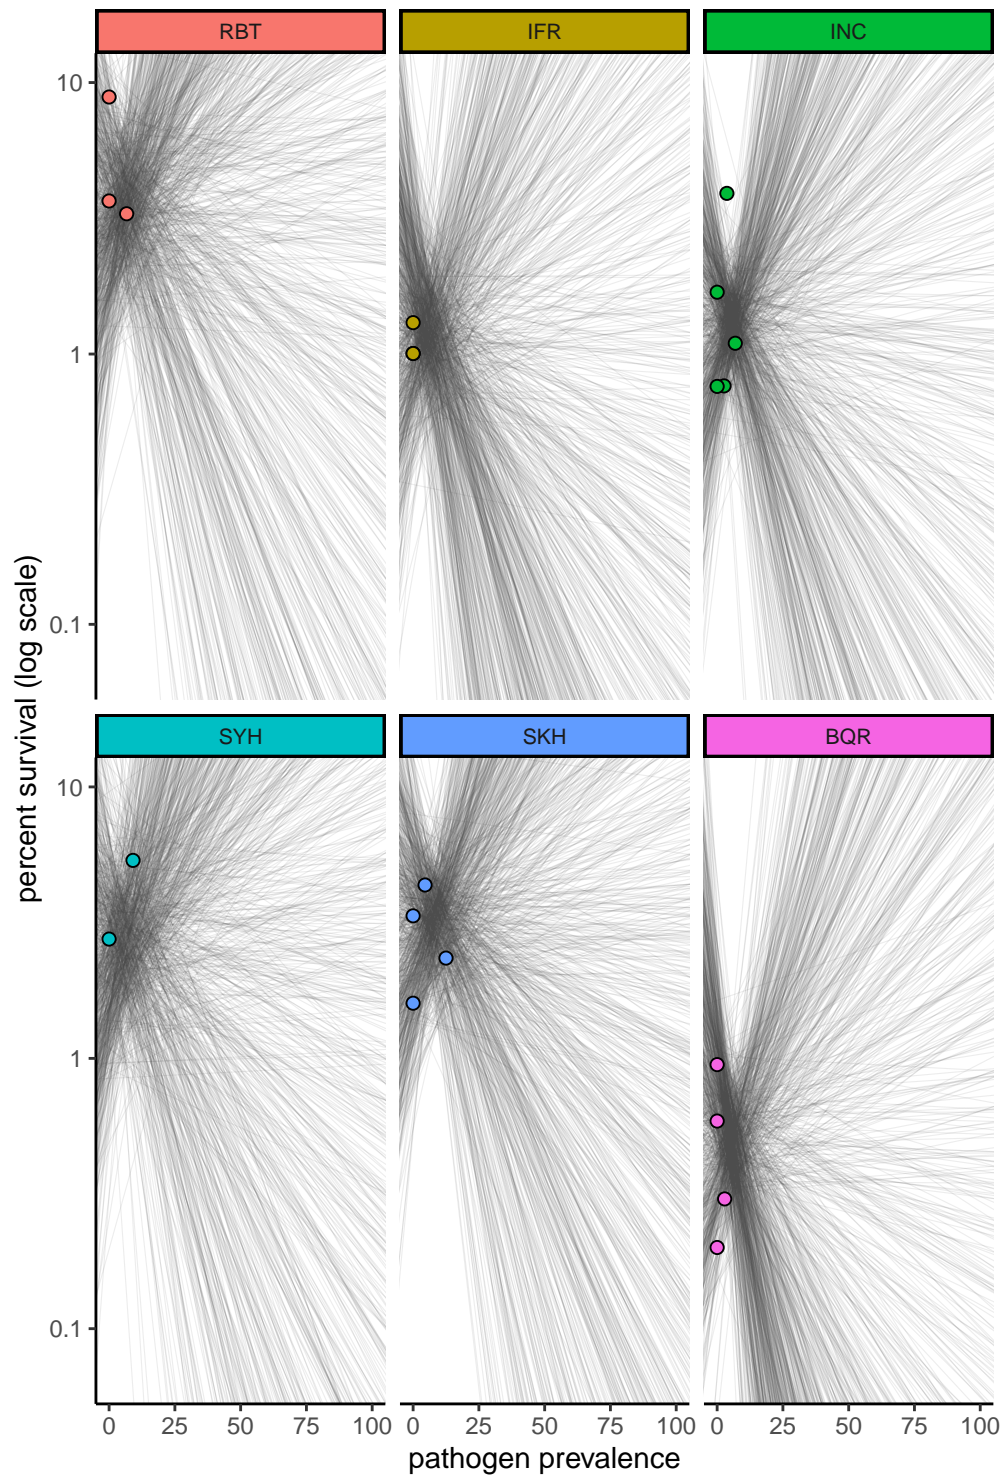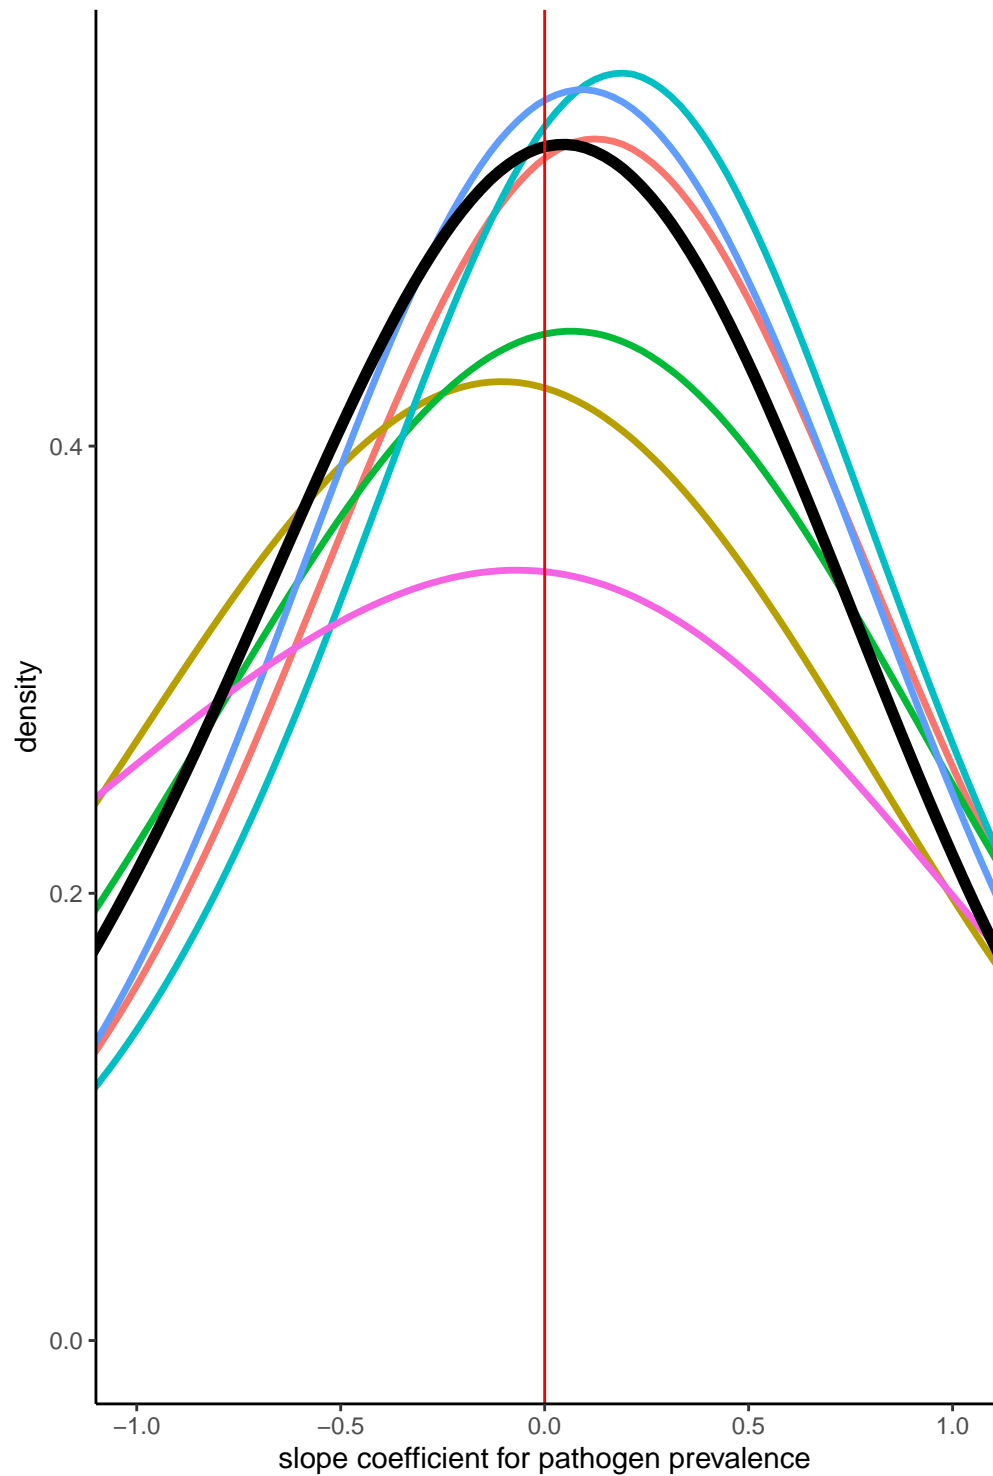

Loma salmonae SpSu

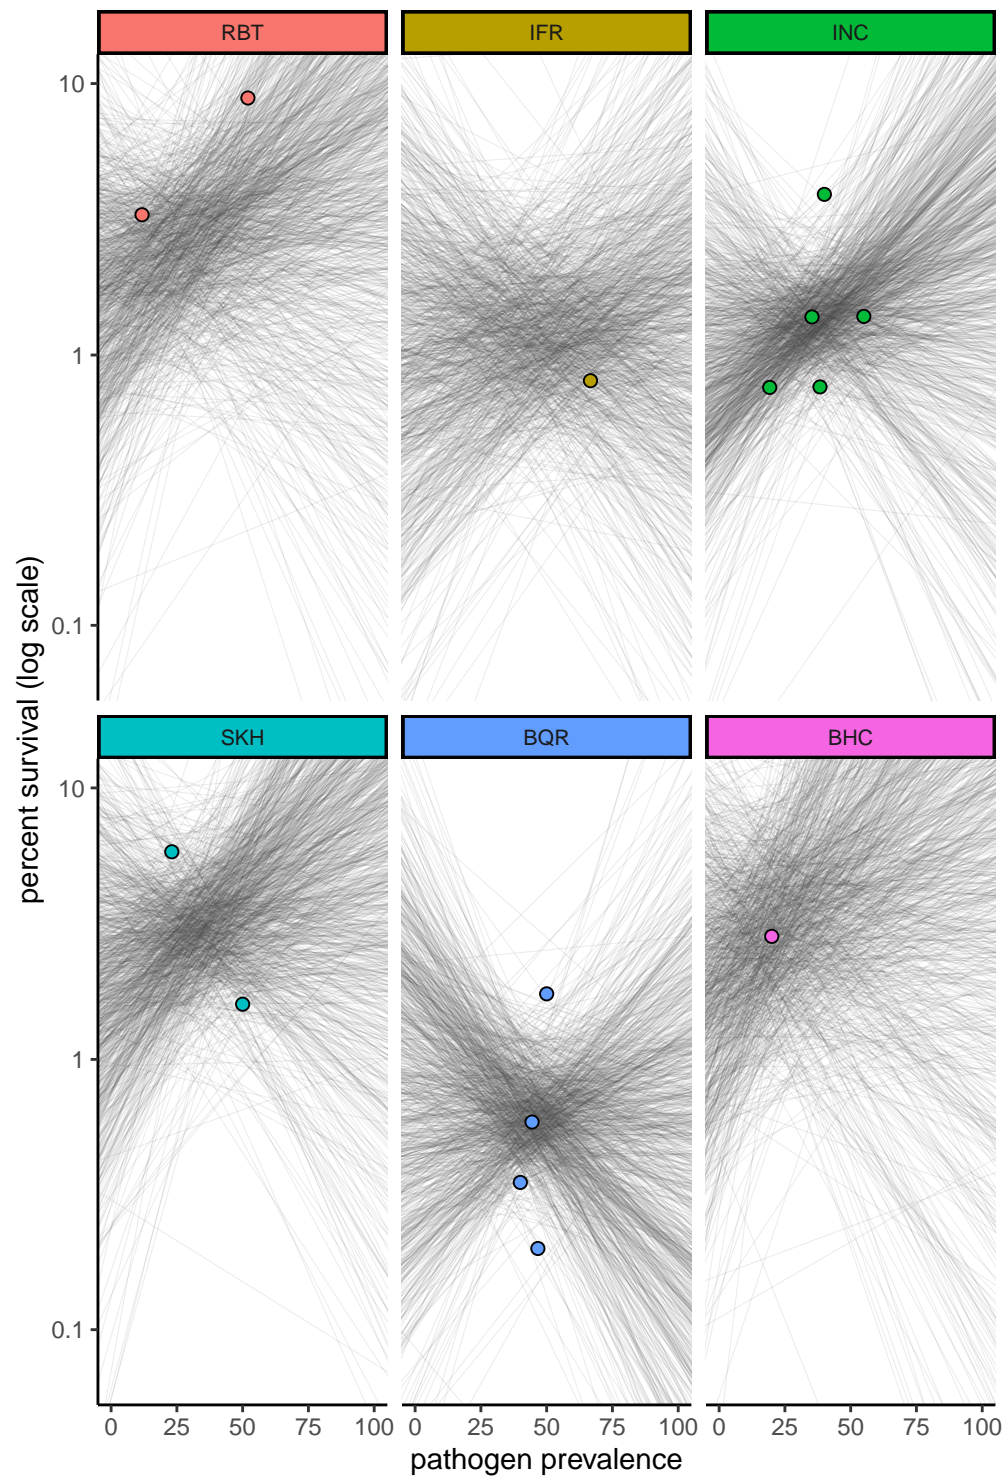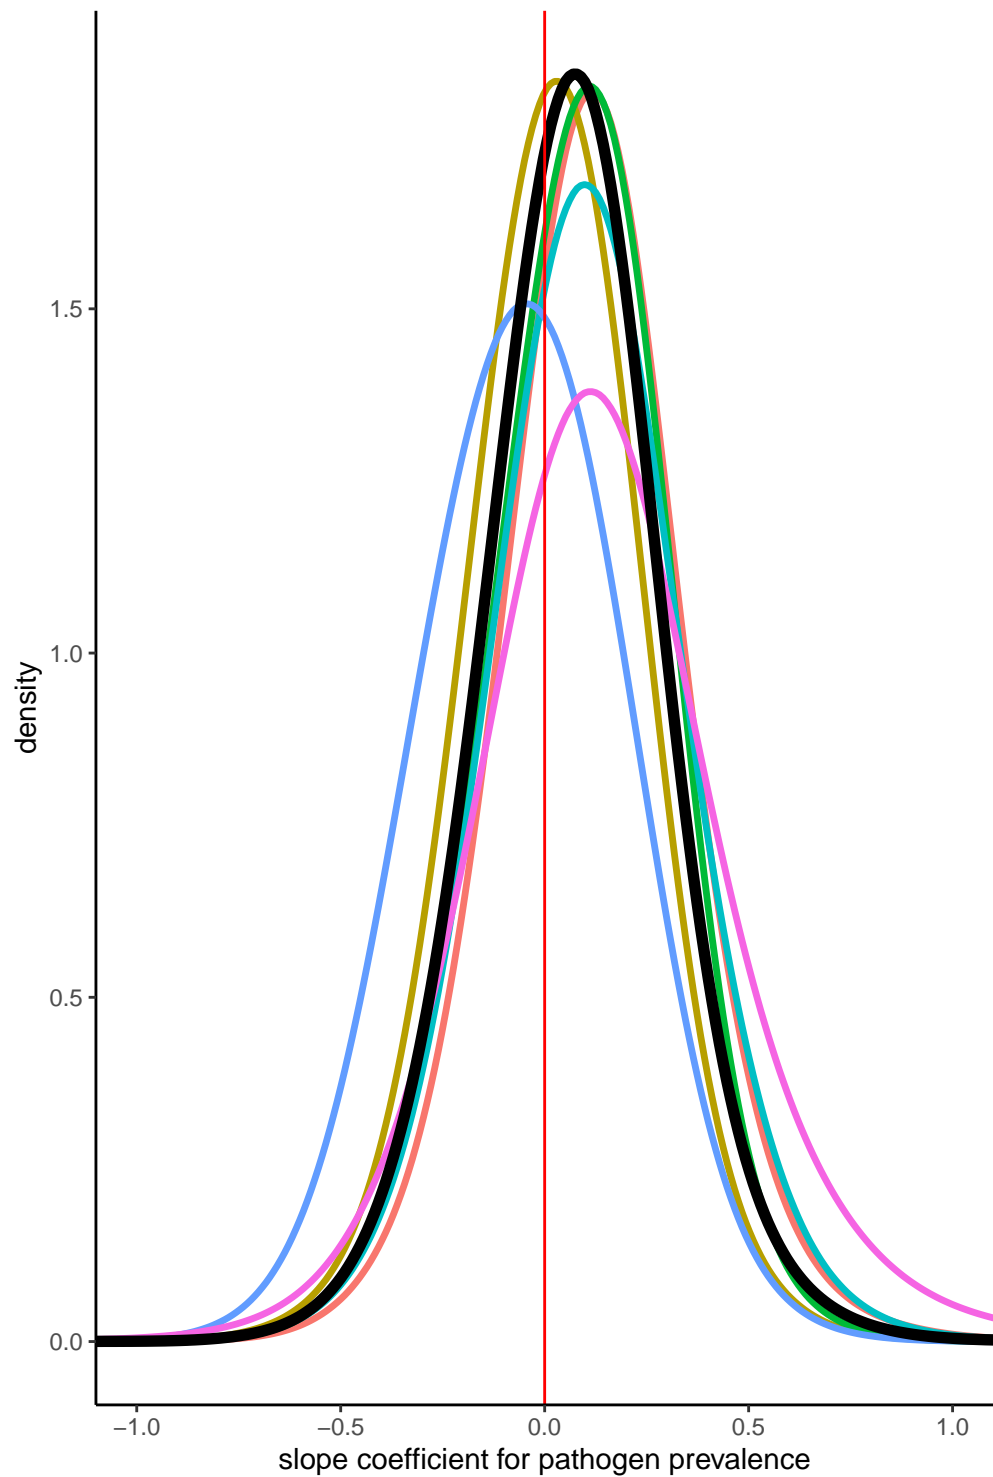



Loma salmonae FaWi

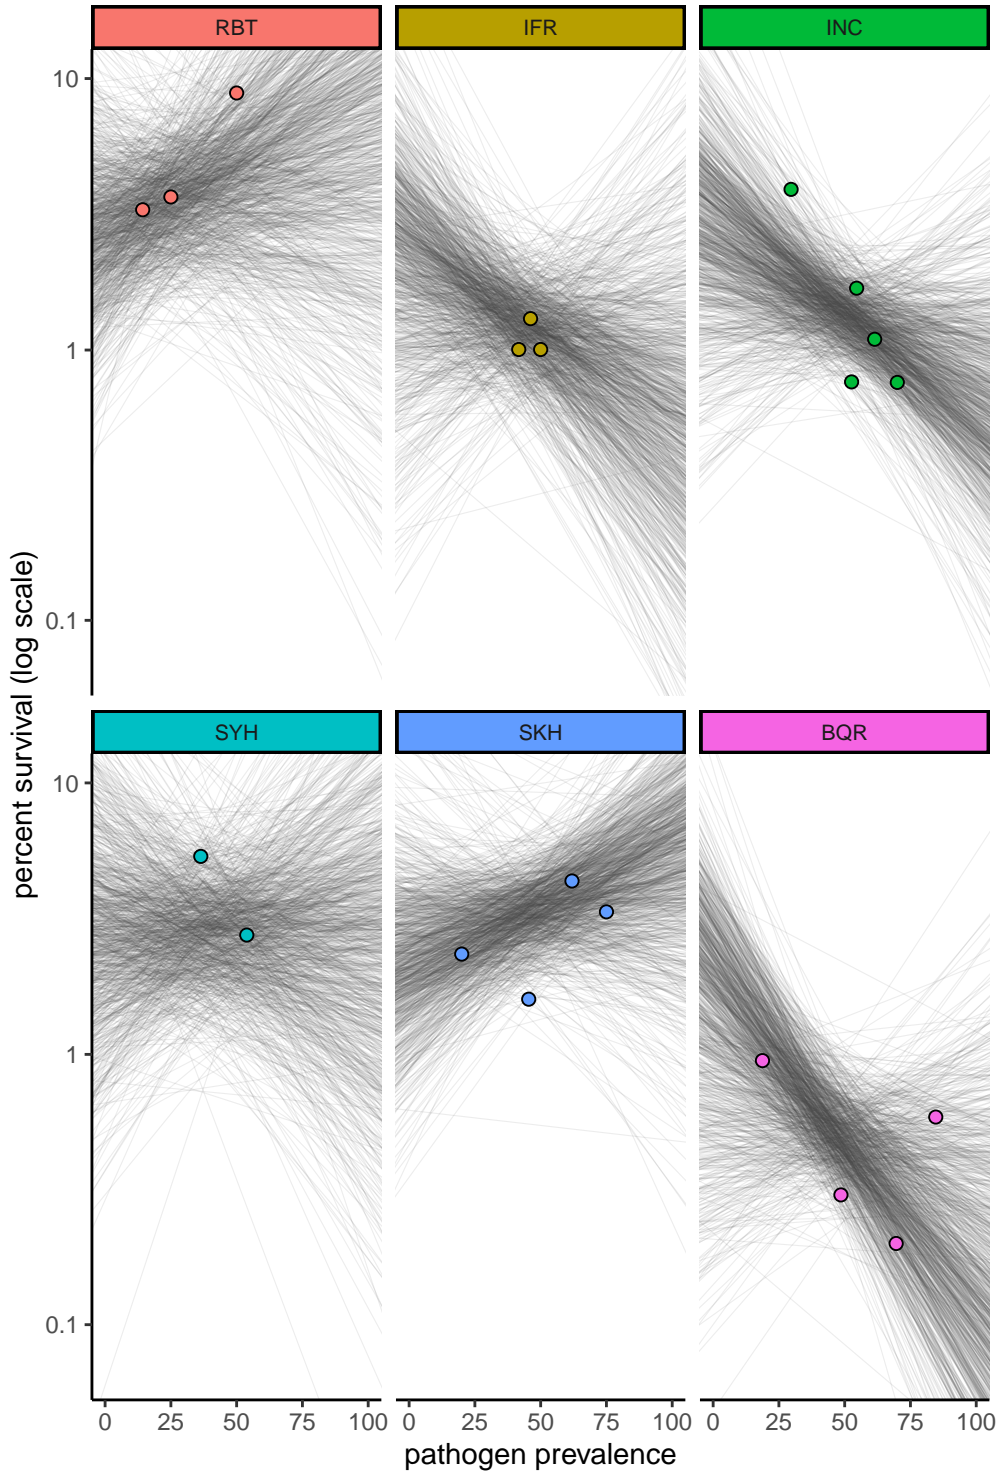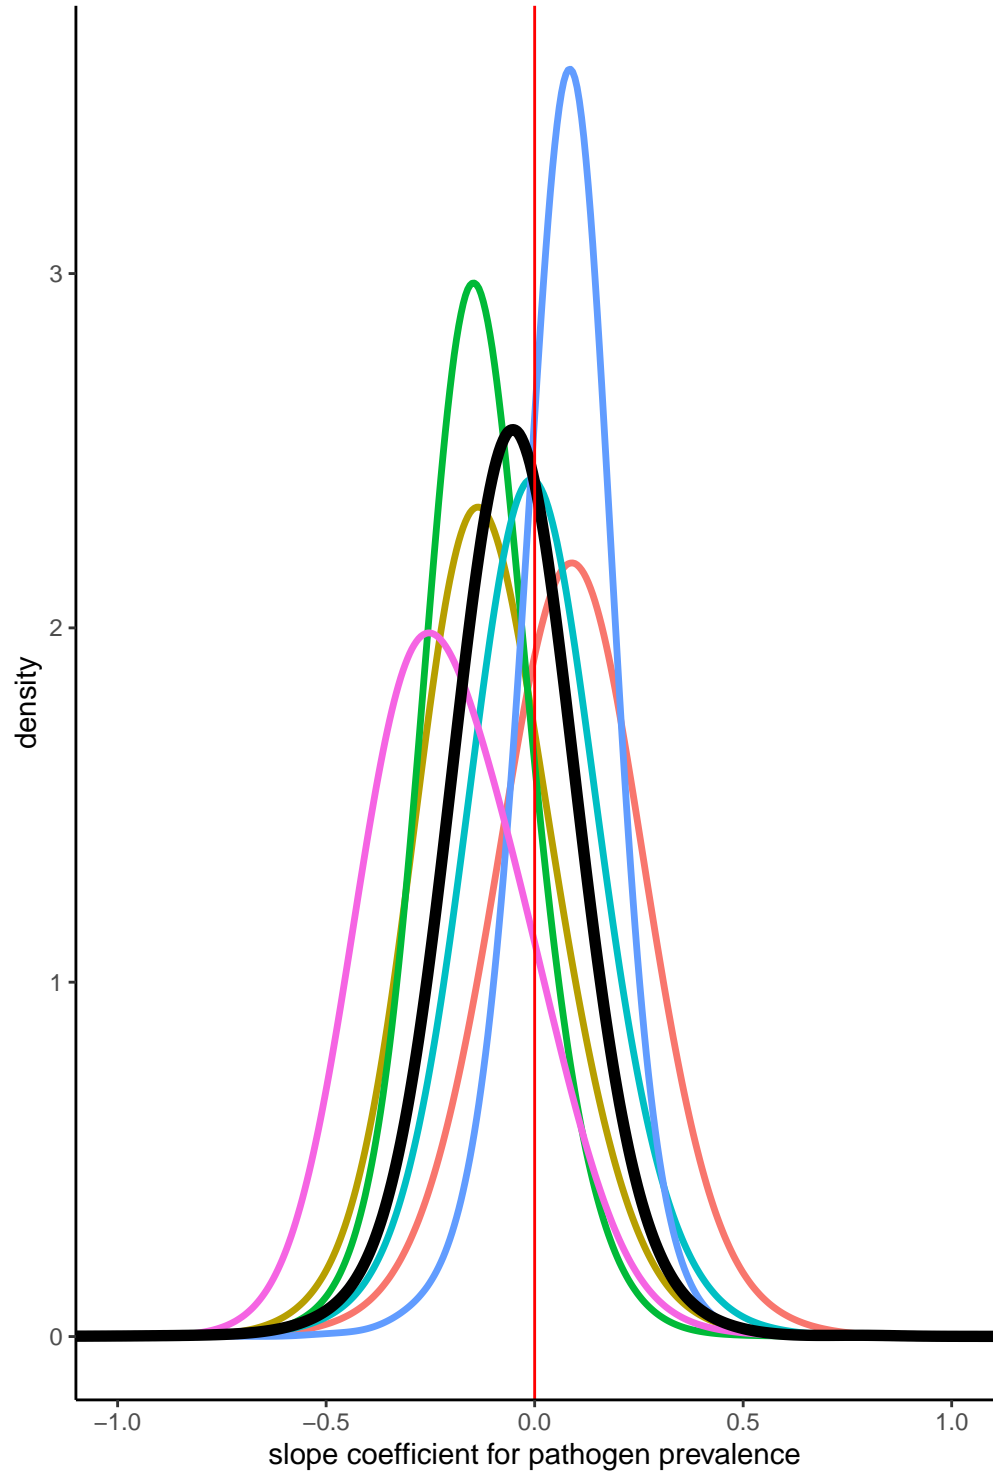

Myxobolus arcticus SpSu

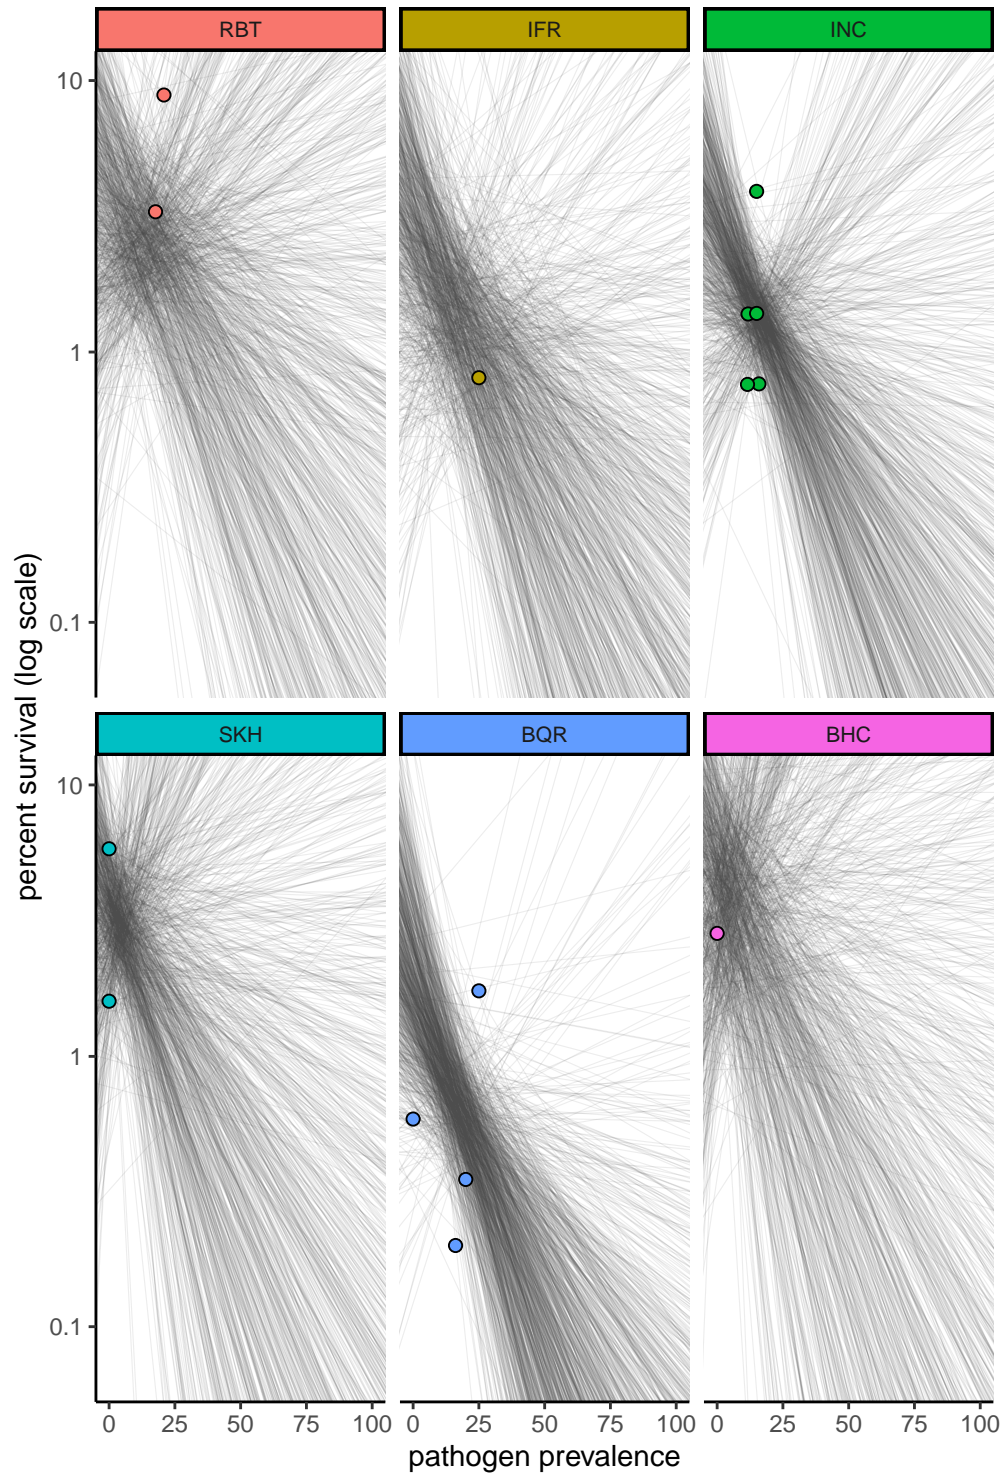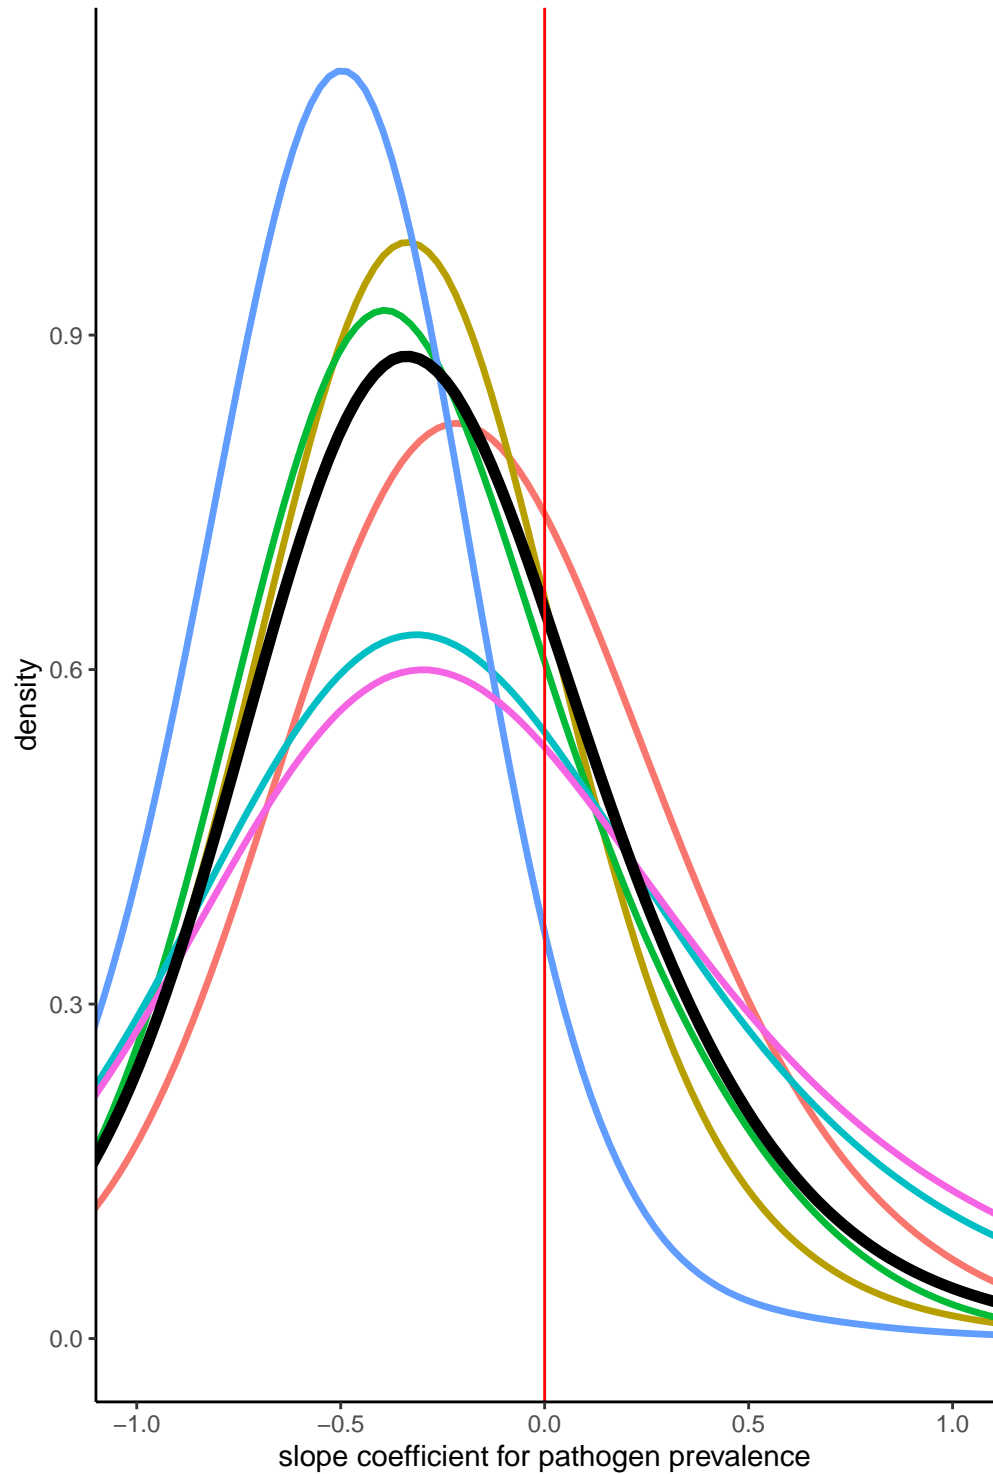



Myxobolus arcticus FaWi

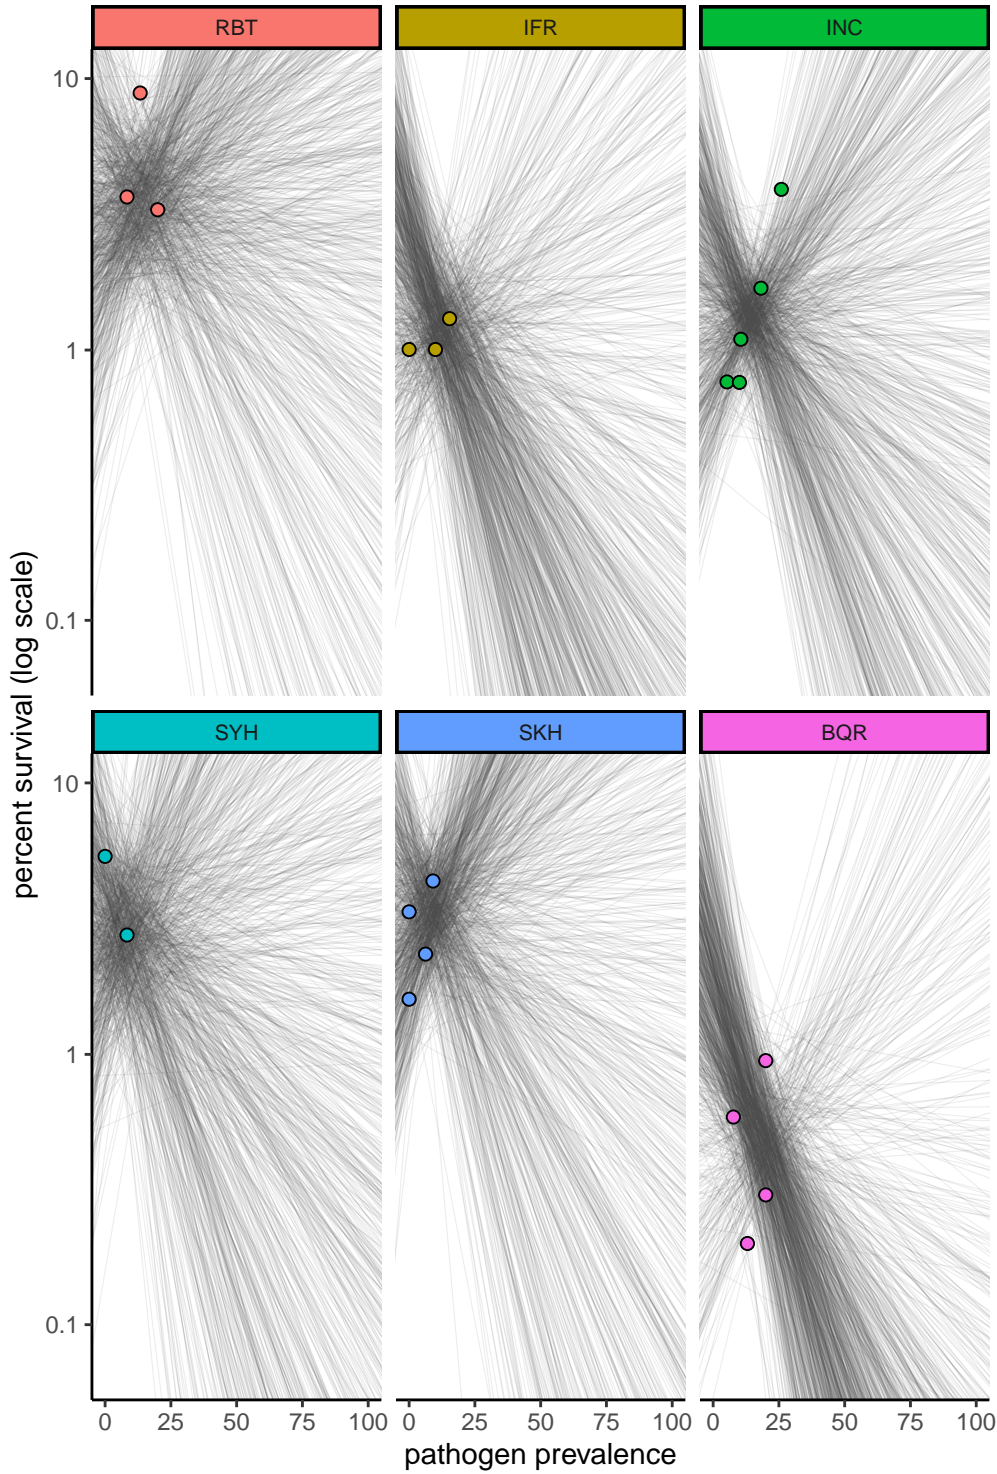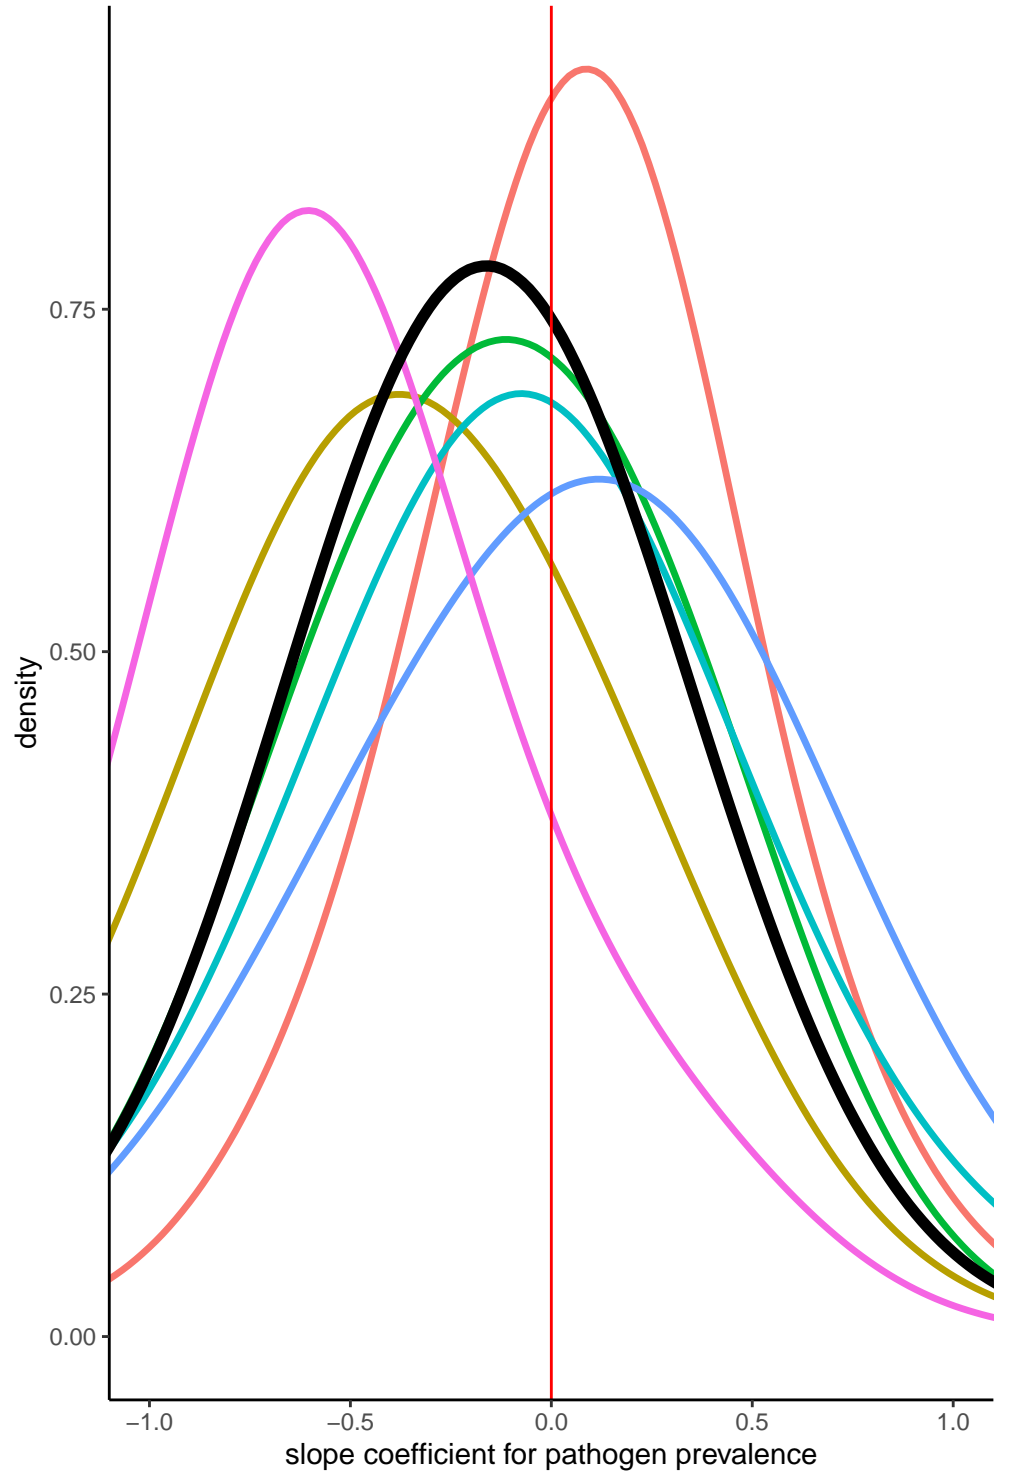

Myxobolus insidiosus SpSu

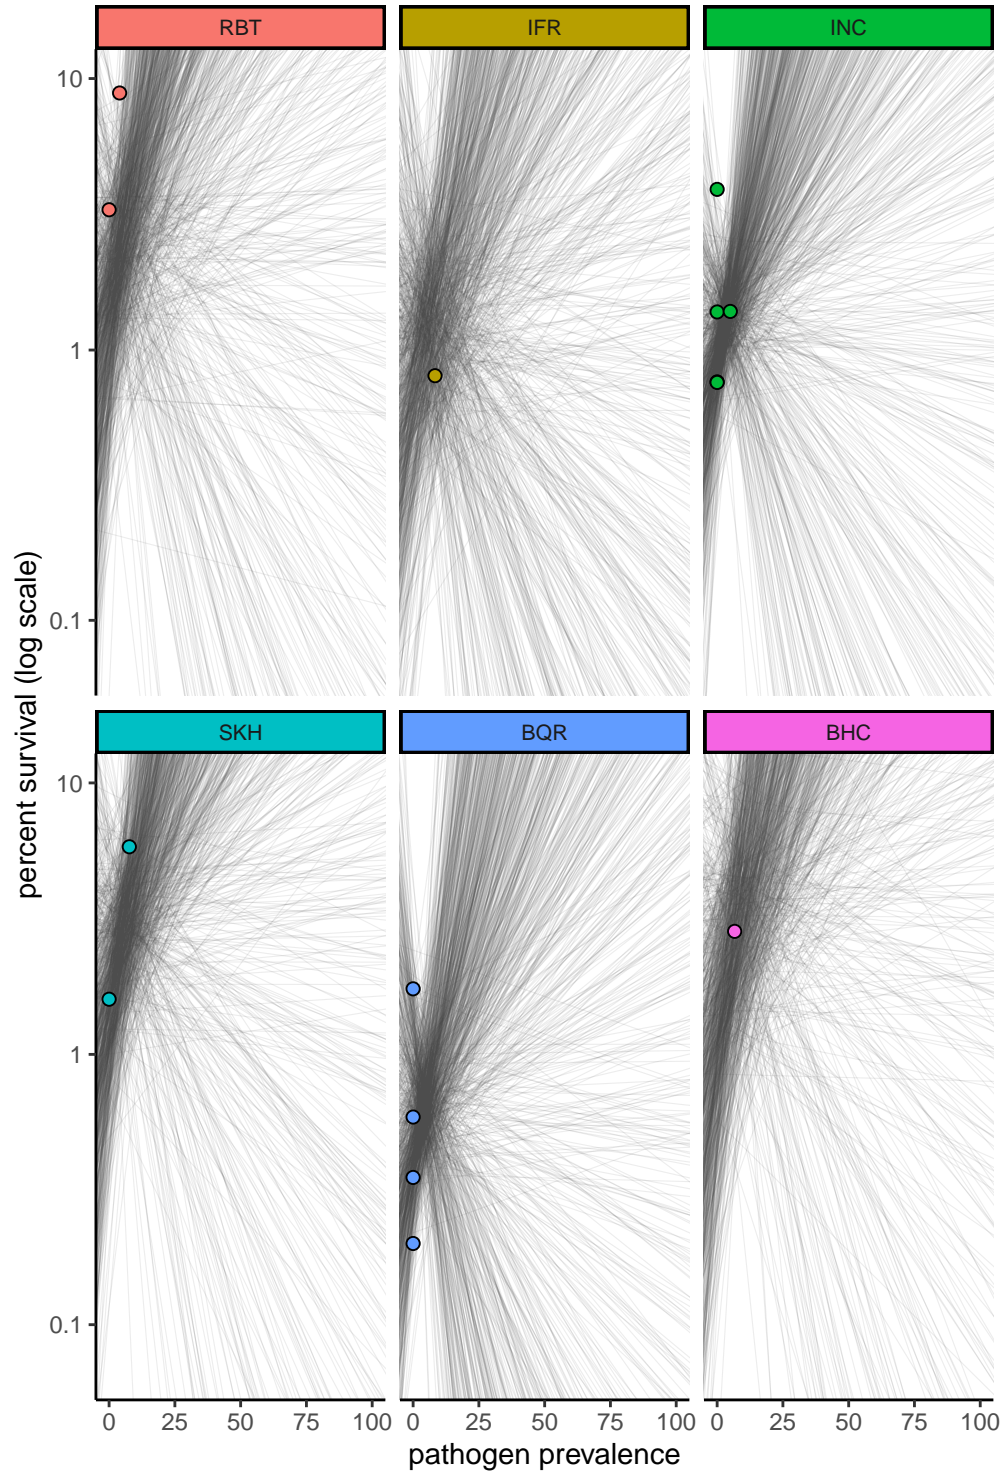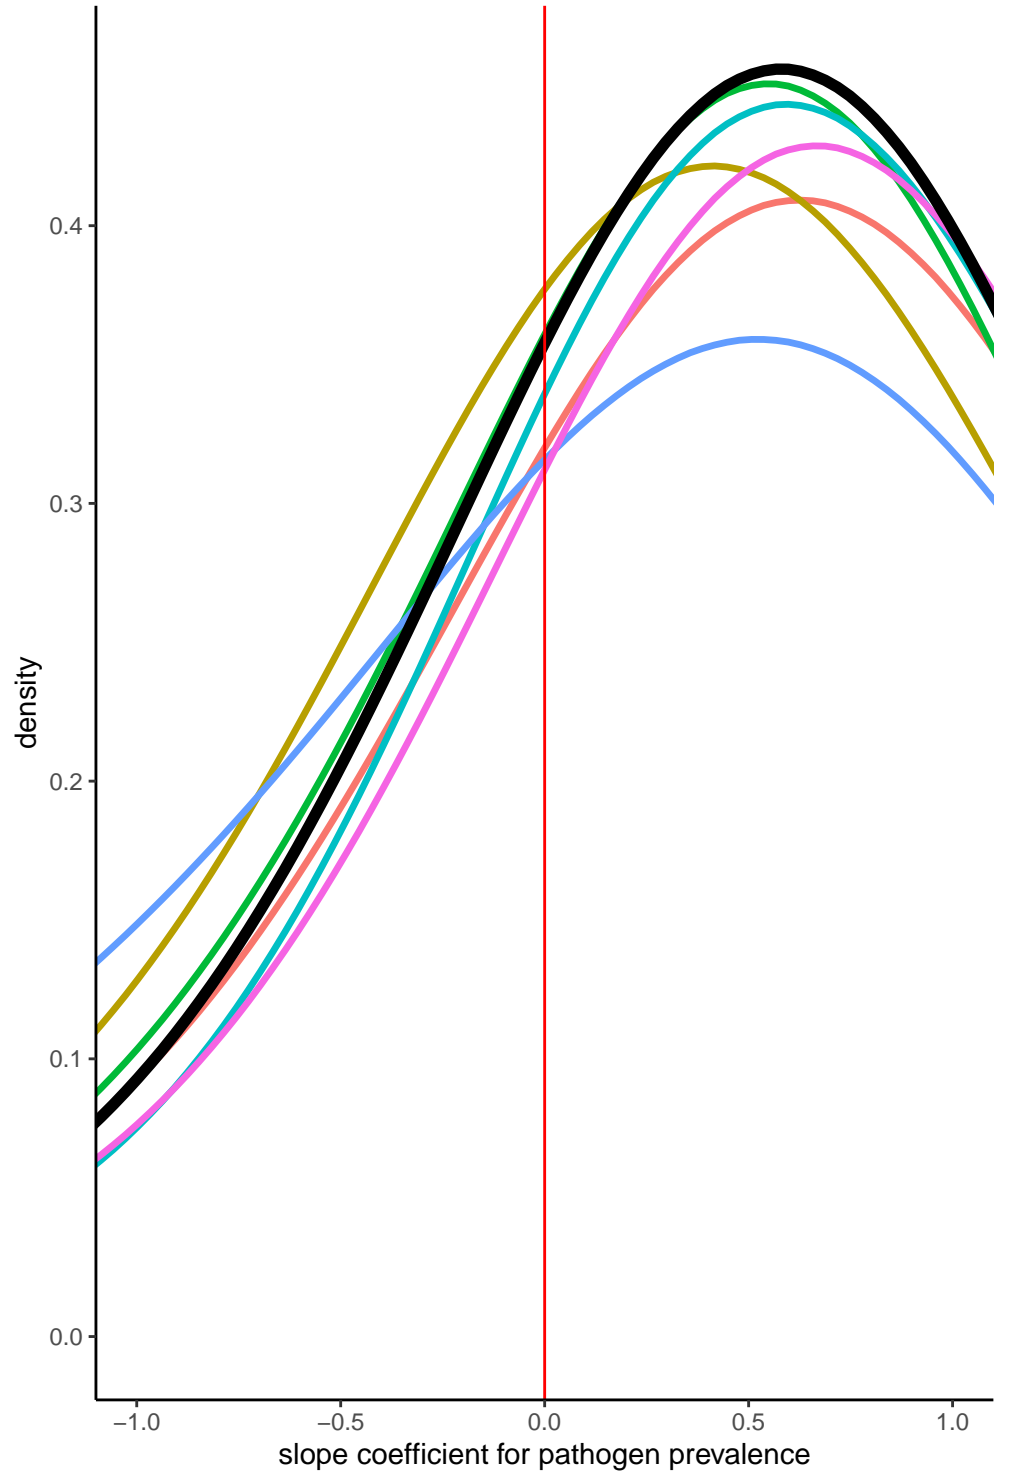



Myxobolus insidiosus FaWi

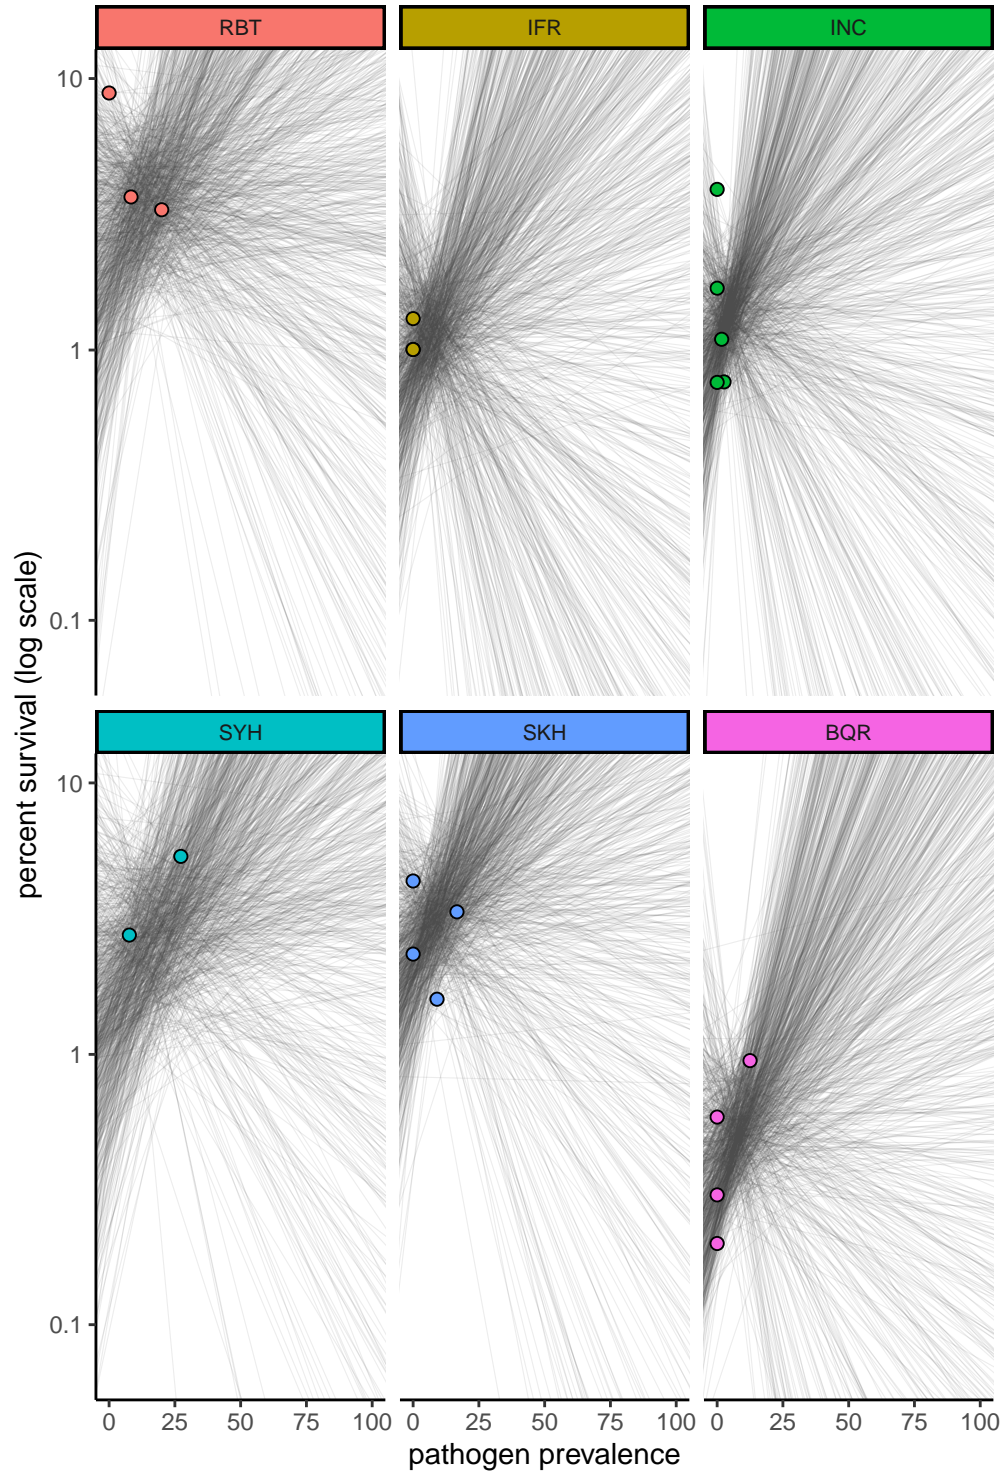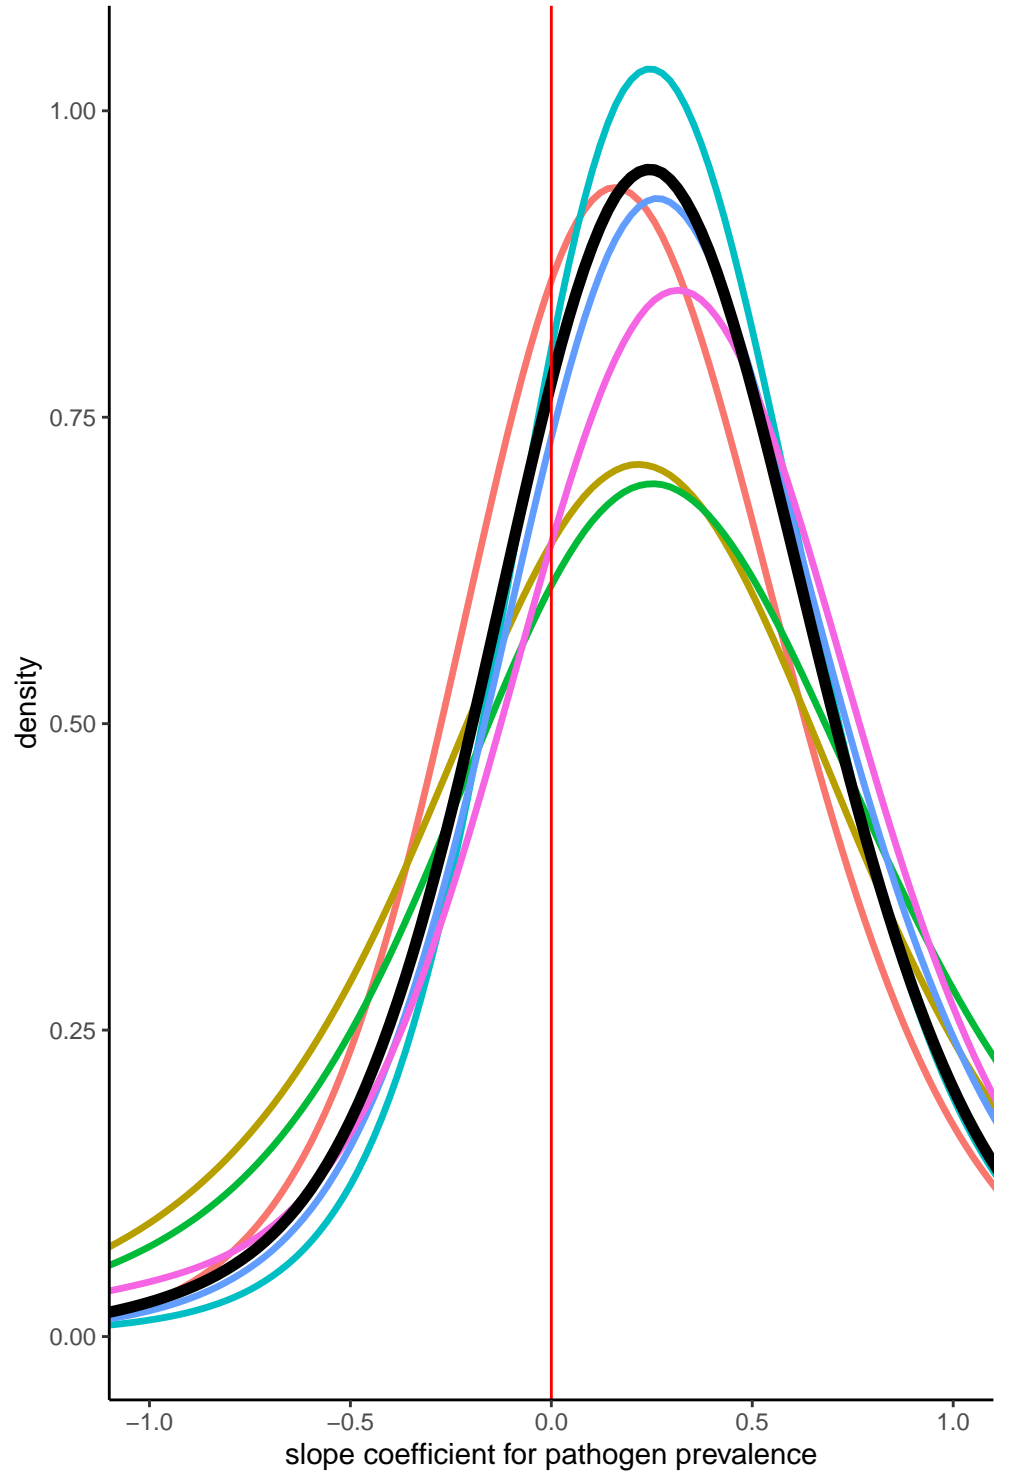

Nanophyetus salmincola SpSu

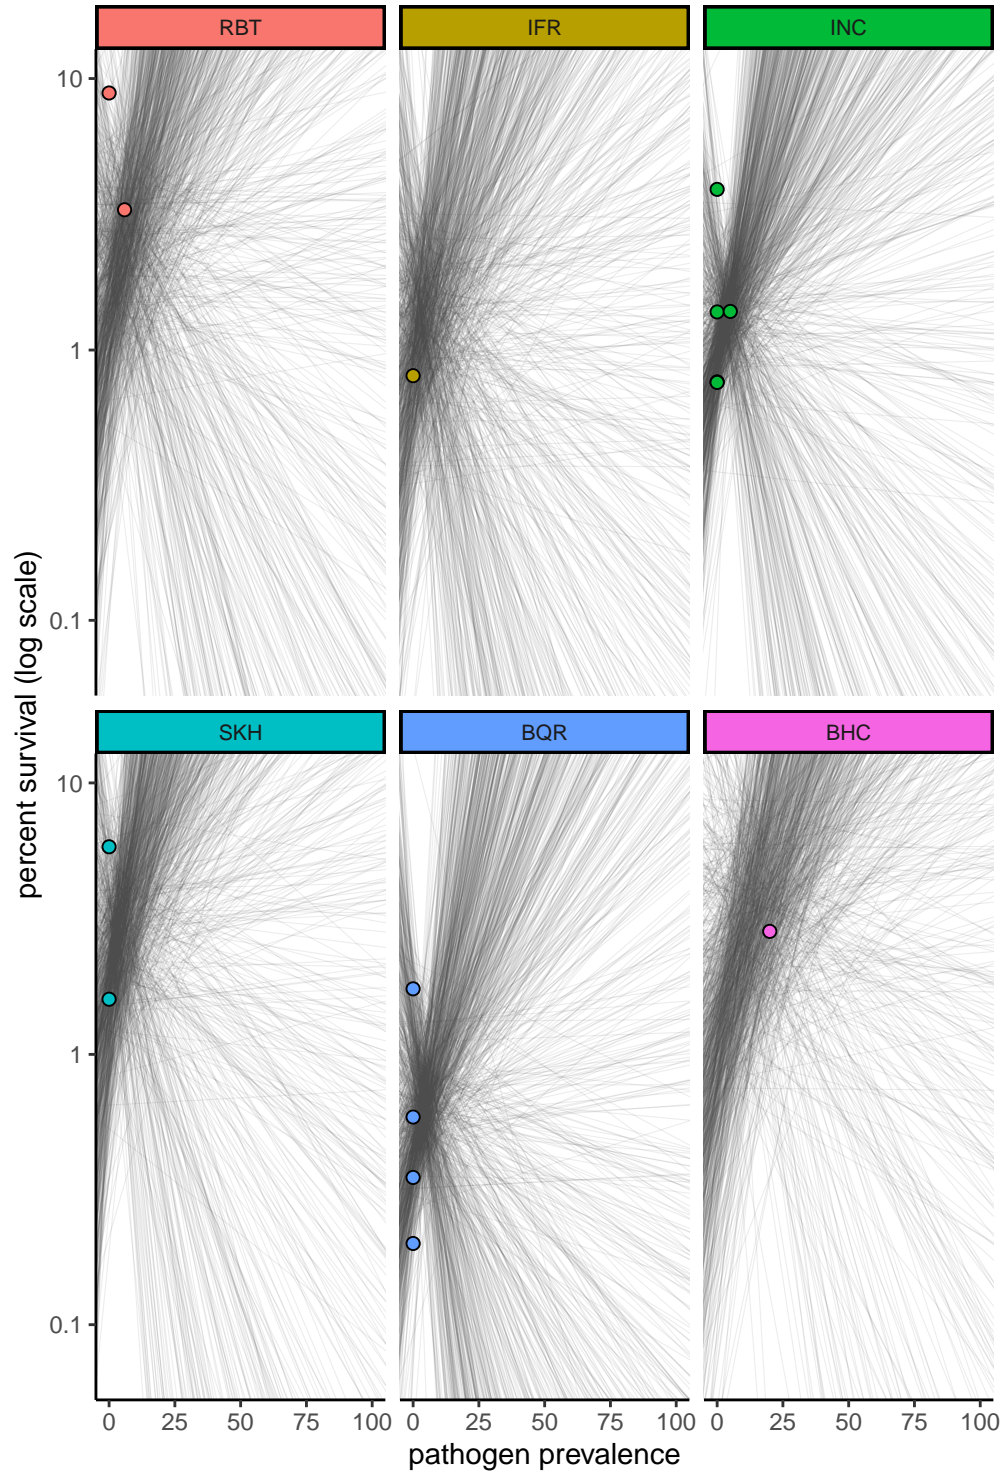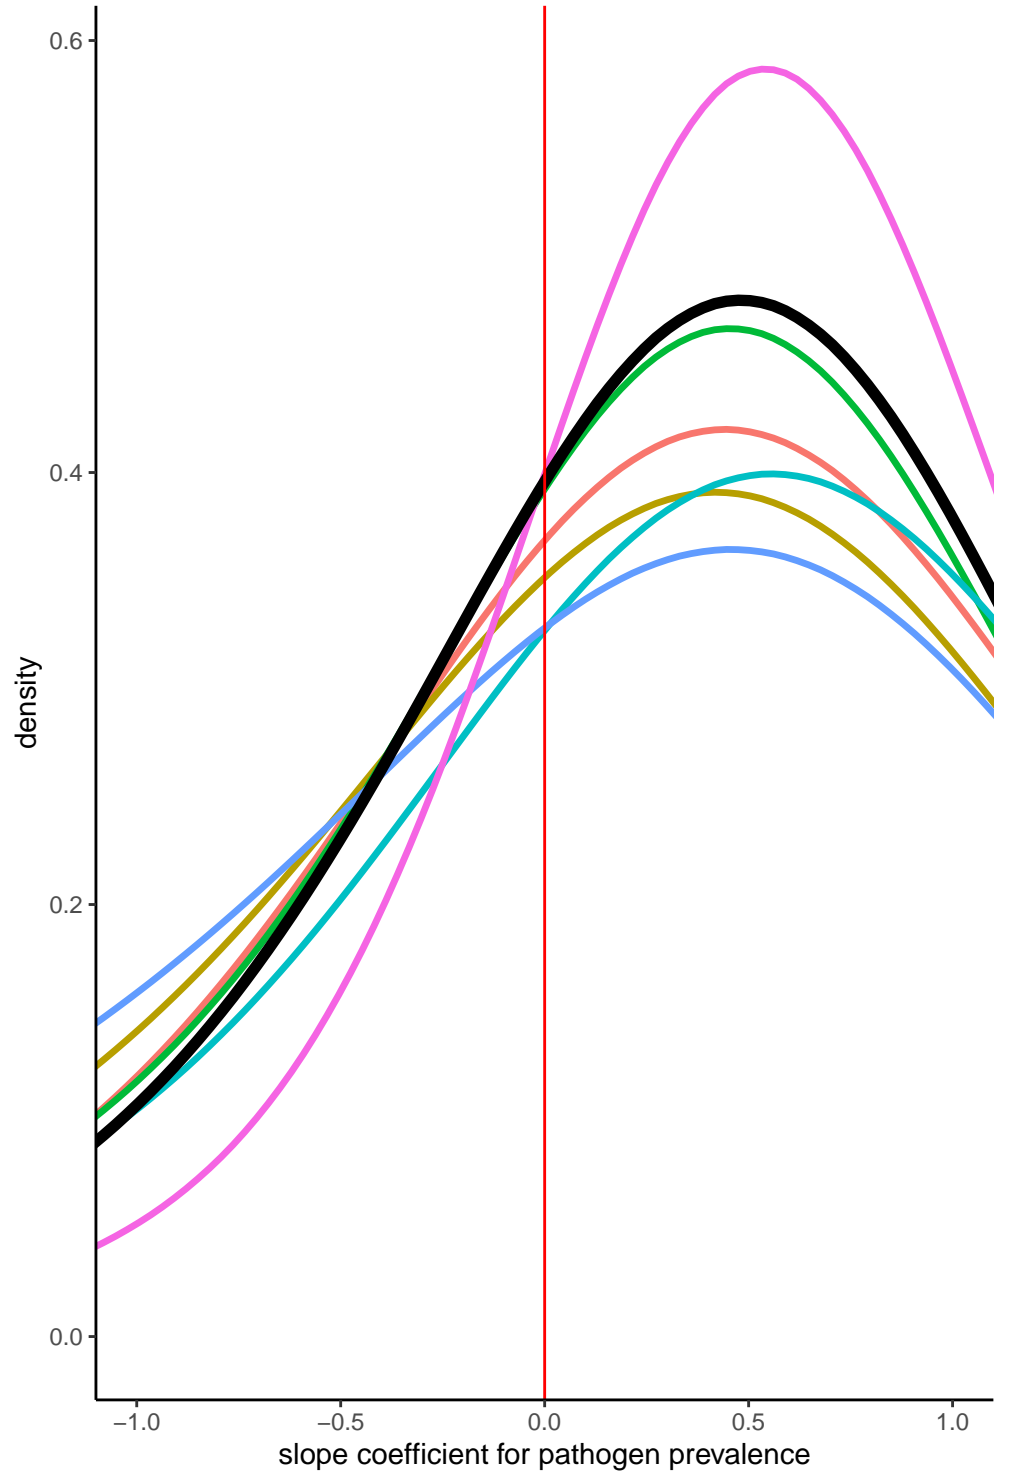



*Nanophyetus salmincola* FaWi

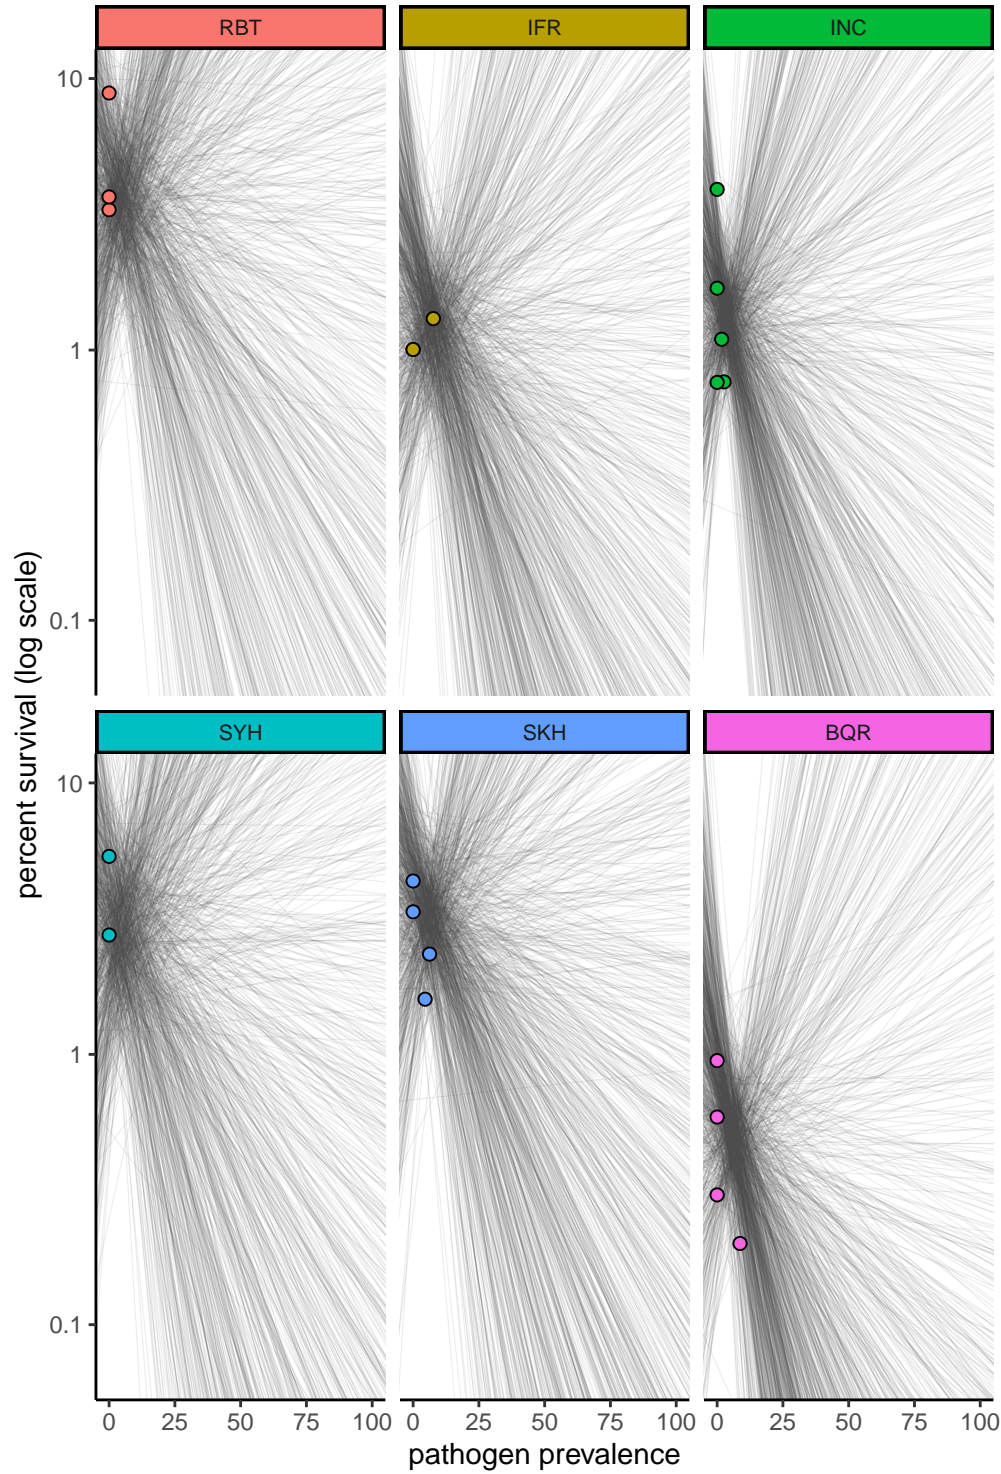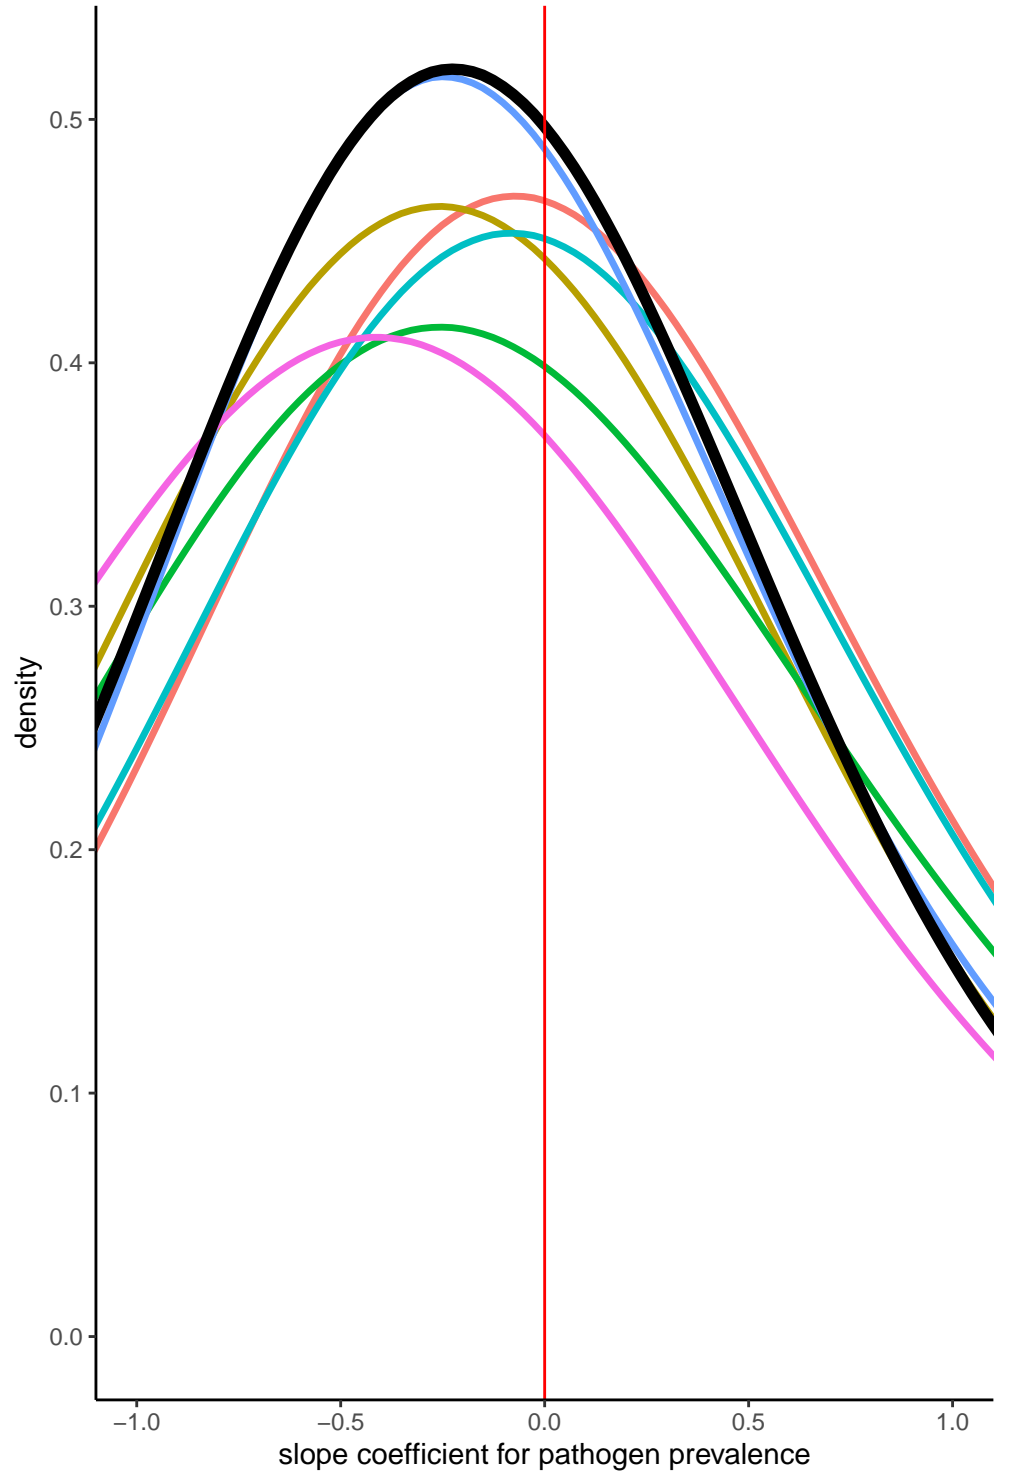

Parvicapsula kabatai SpSu

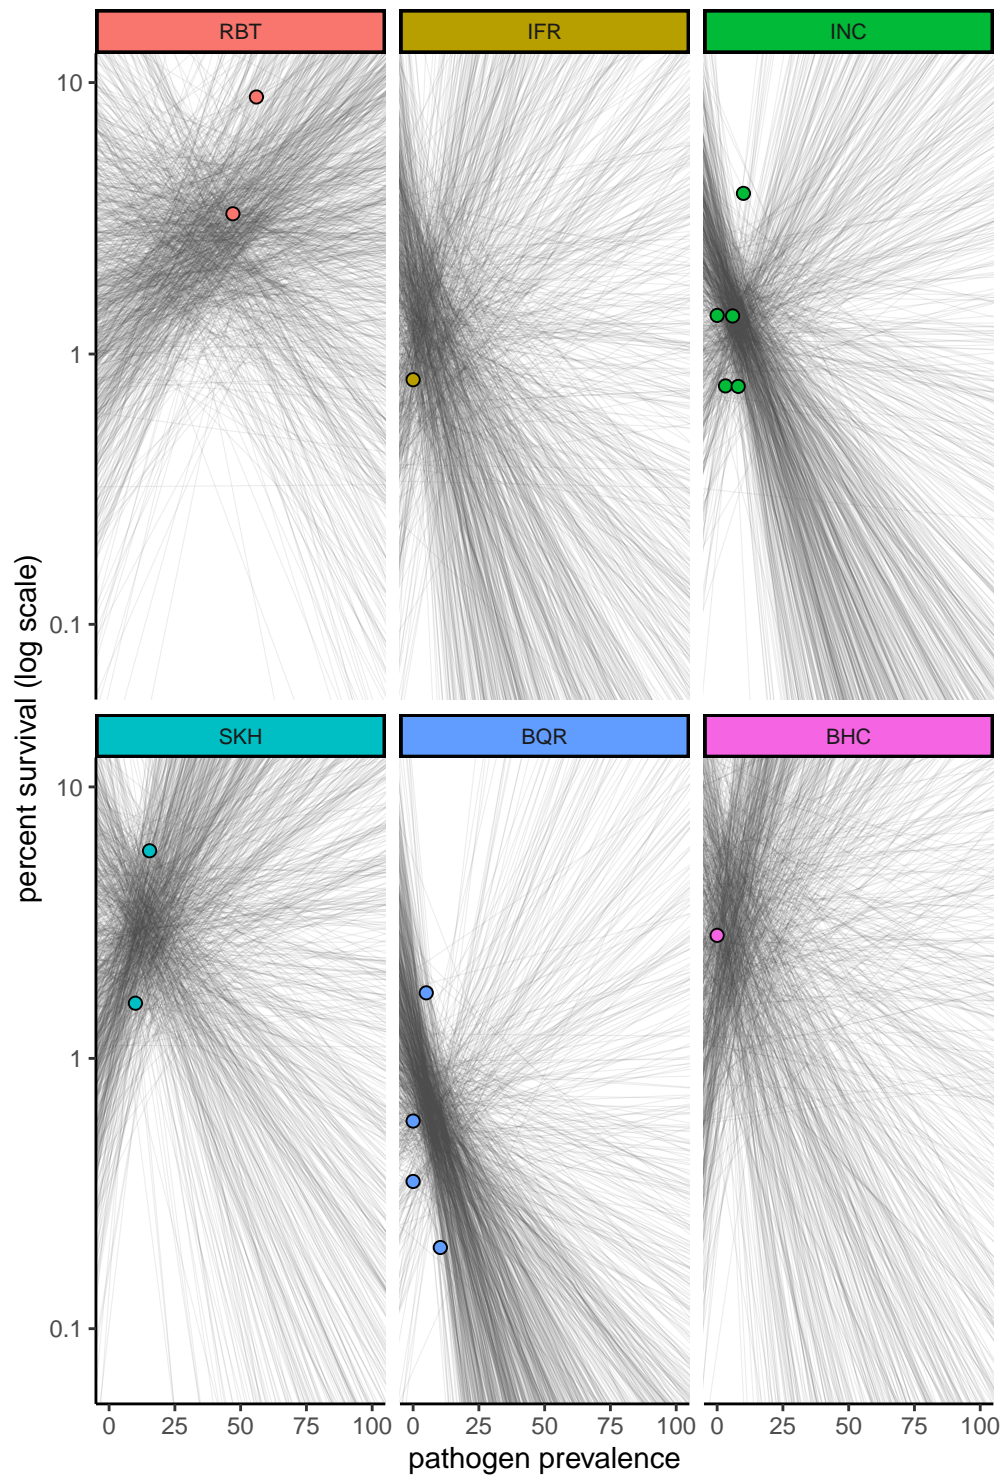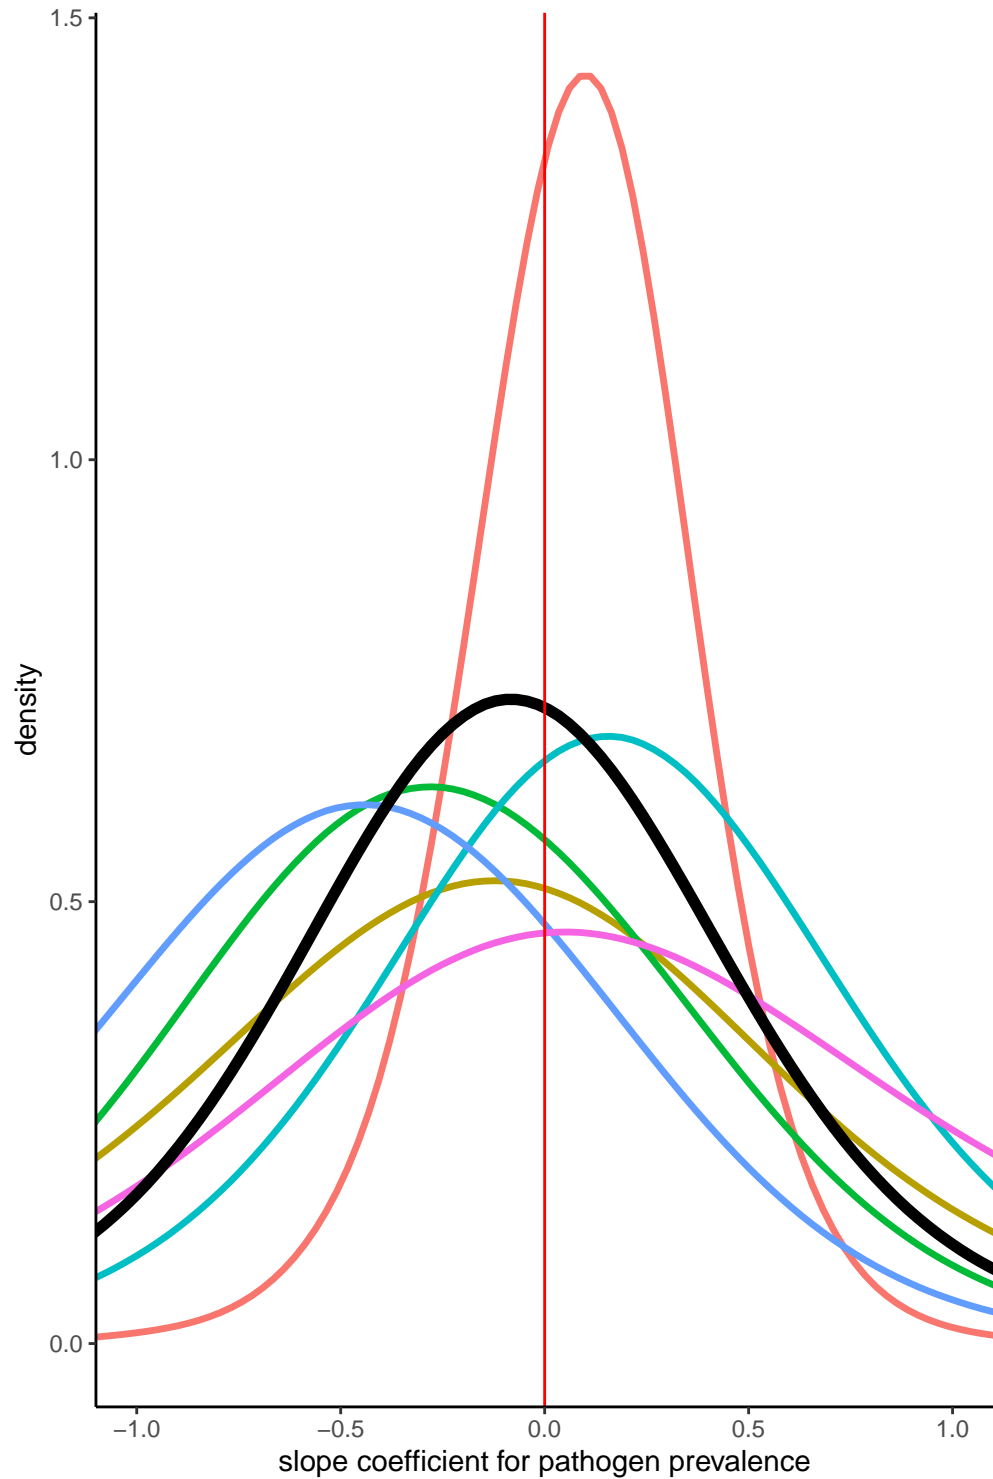



Parvicapsula kabatai FaWi

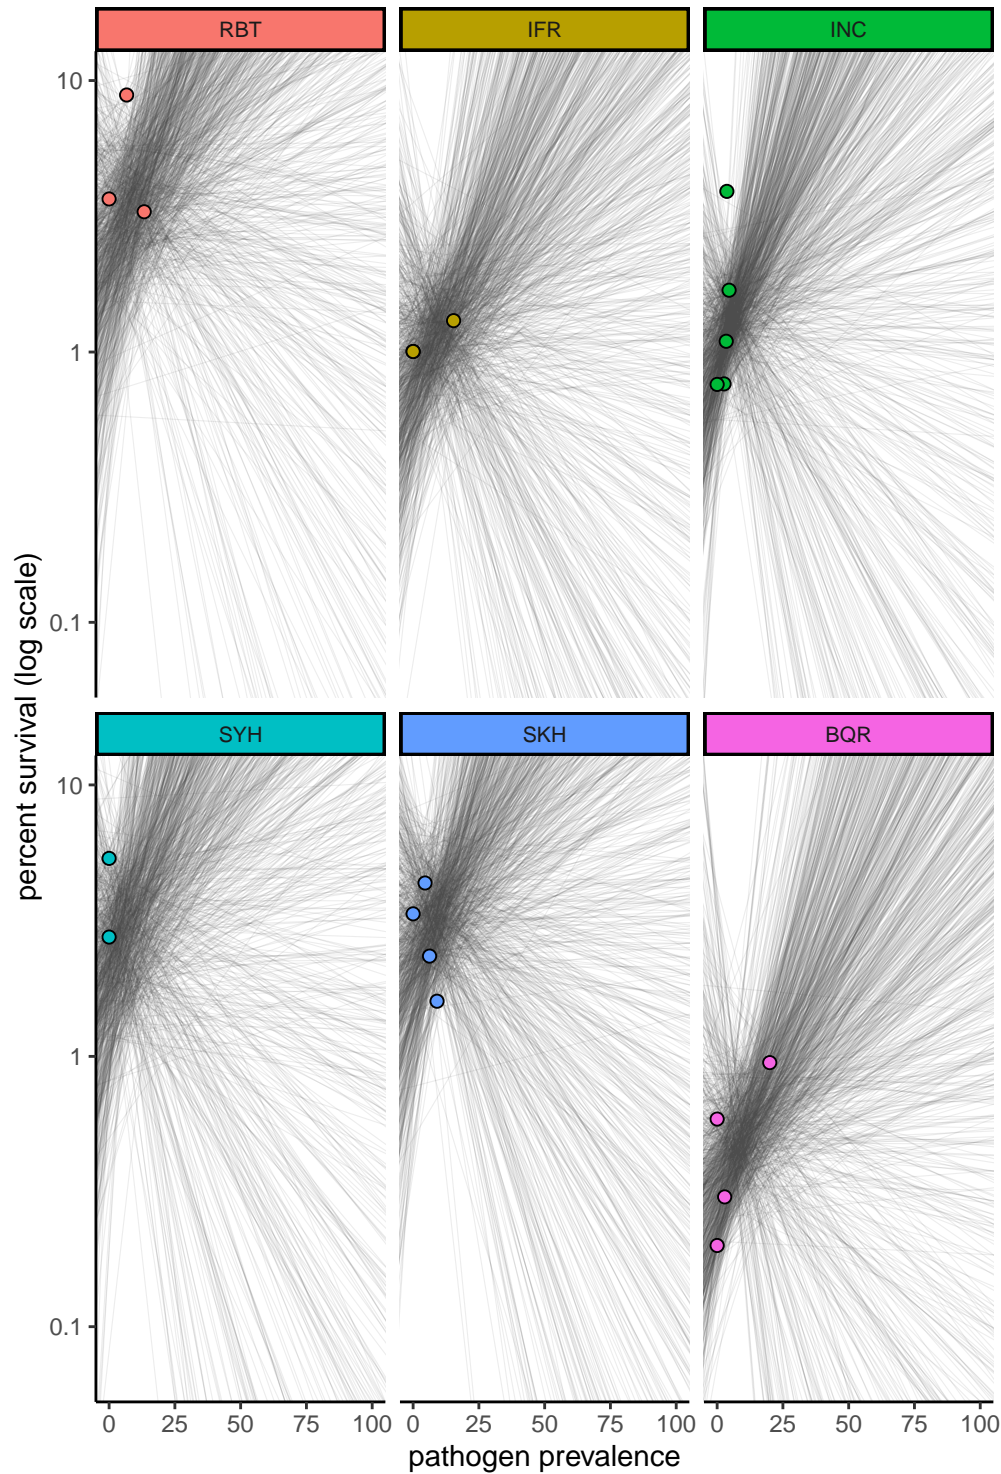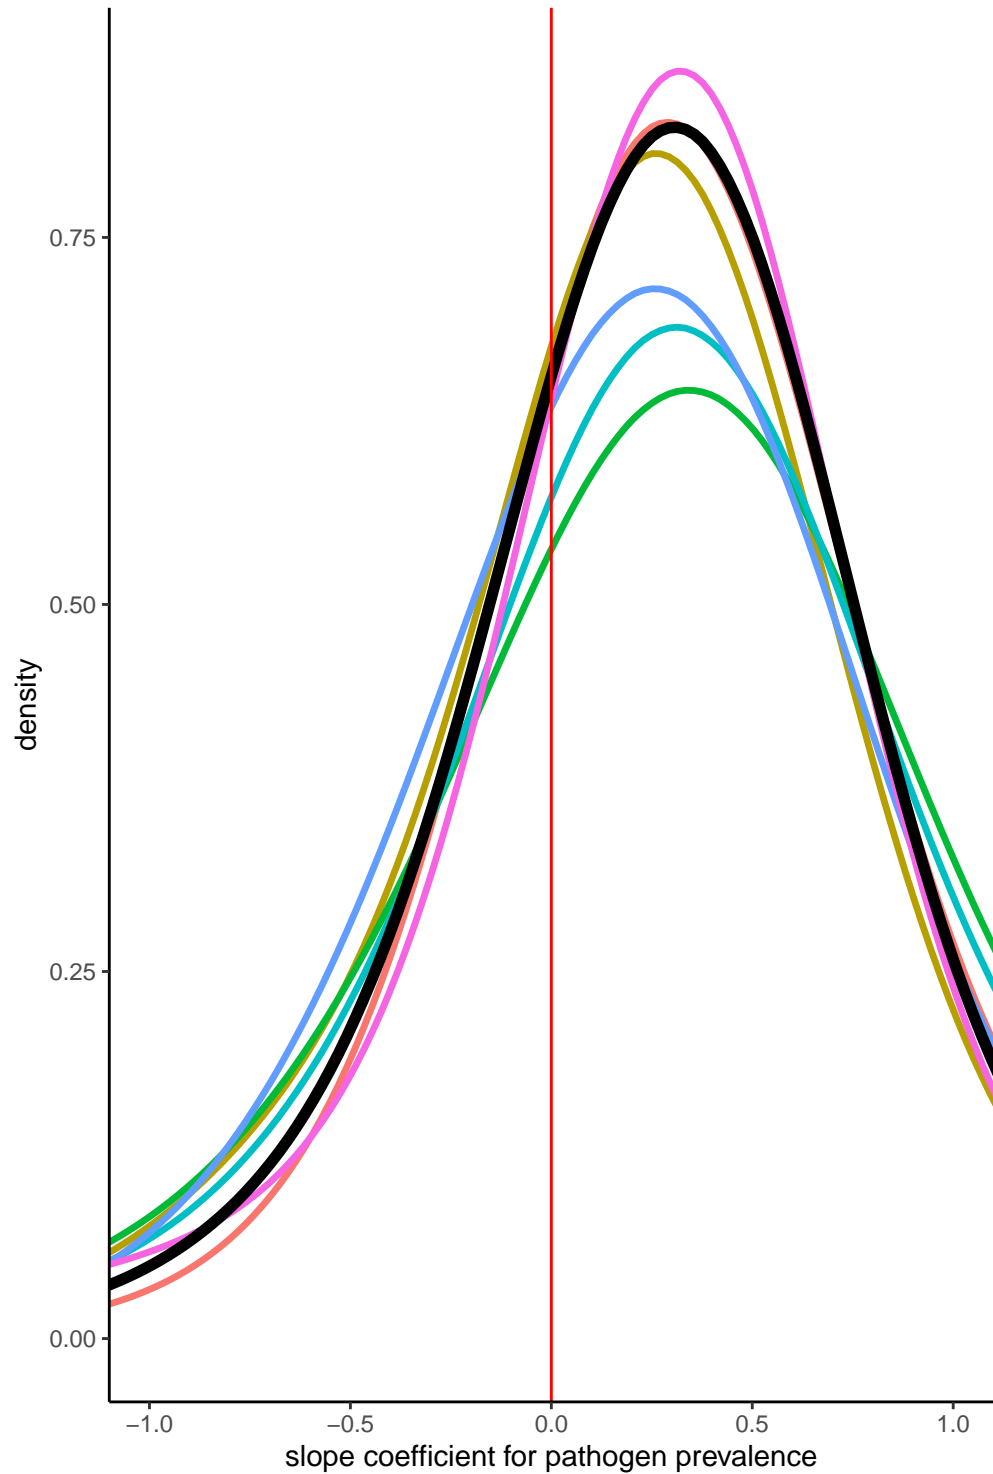

Parvicapsula minibicornis SpSu

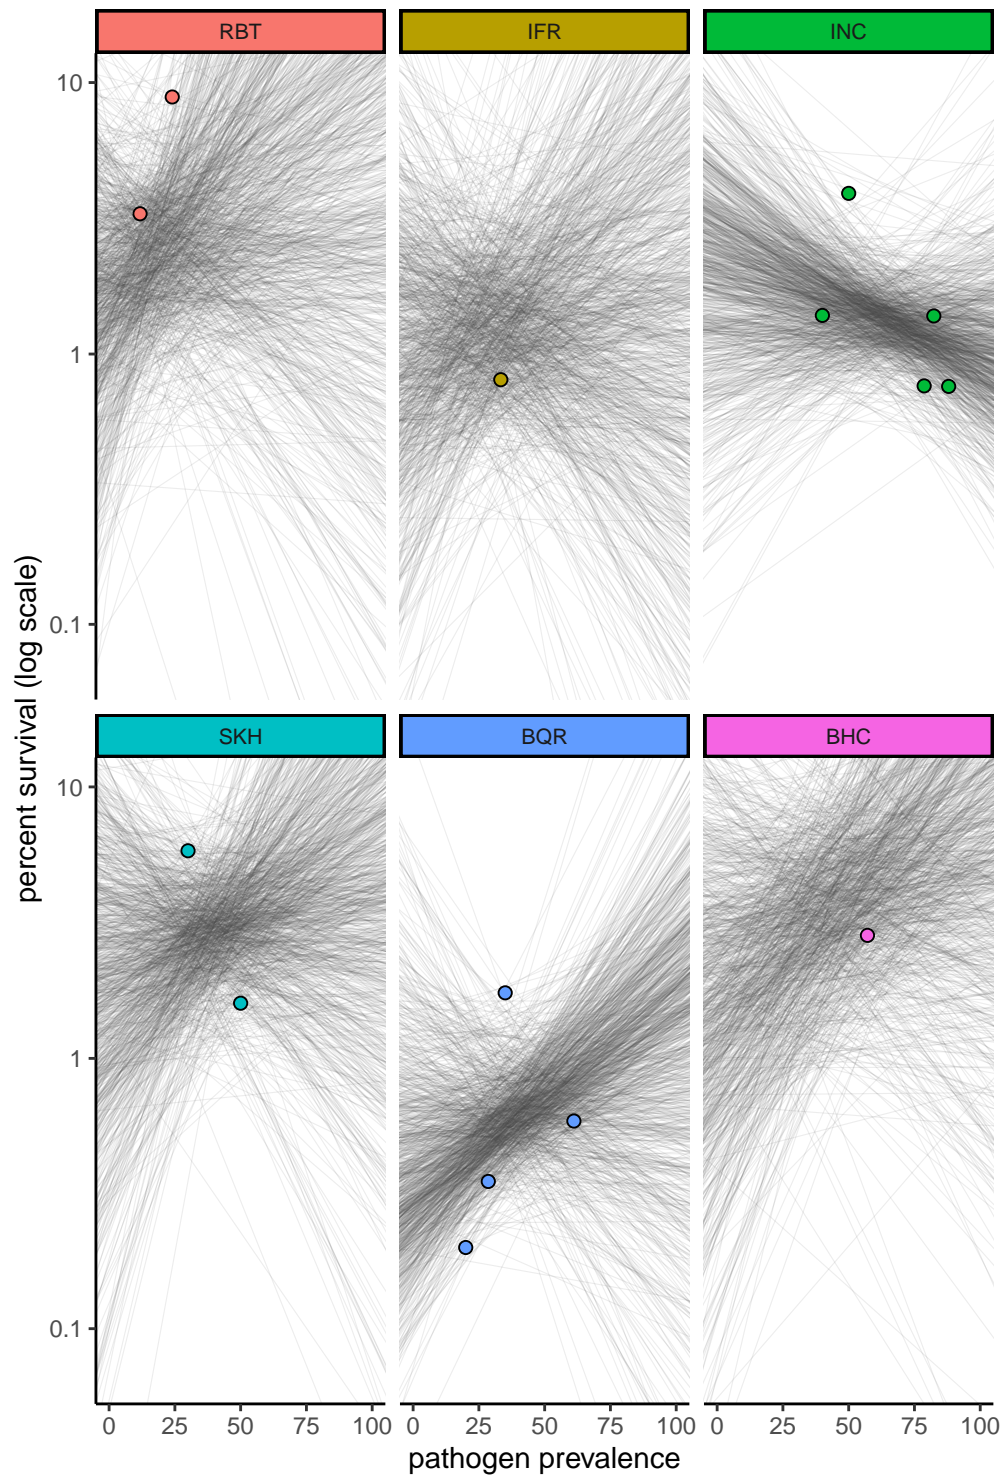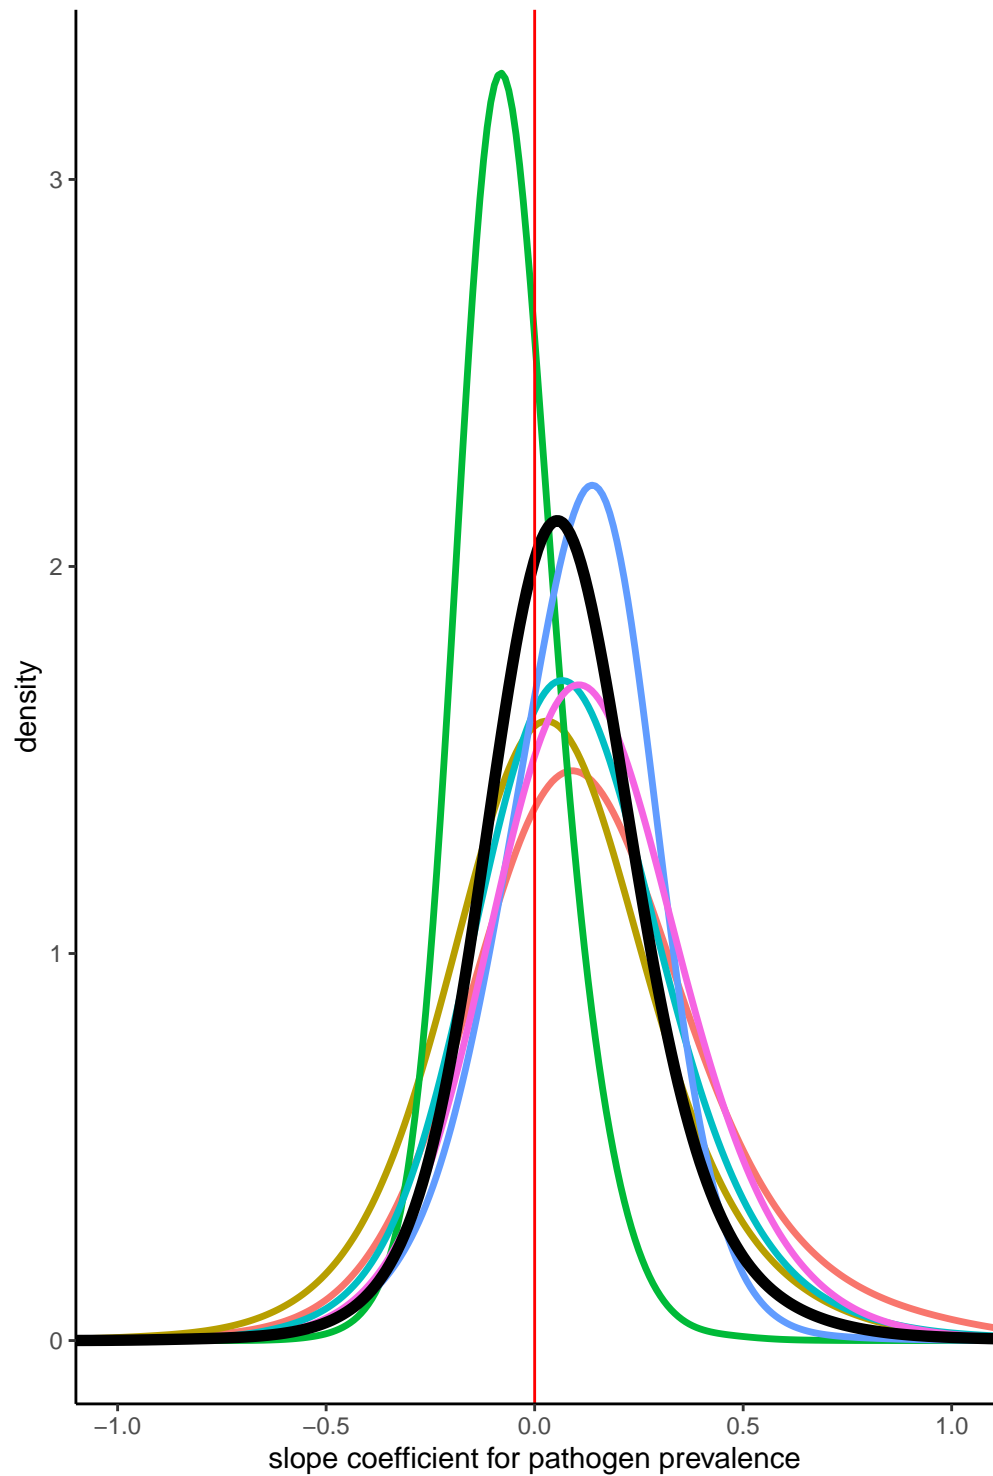



Parvicapsula minibicornis FaWi

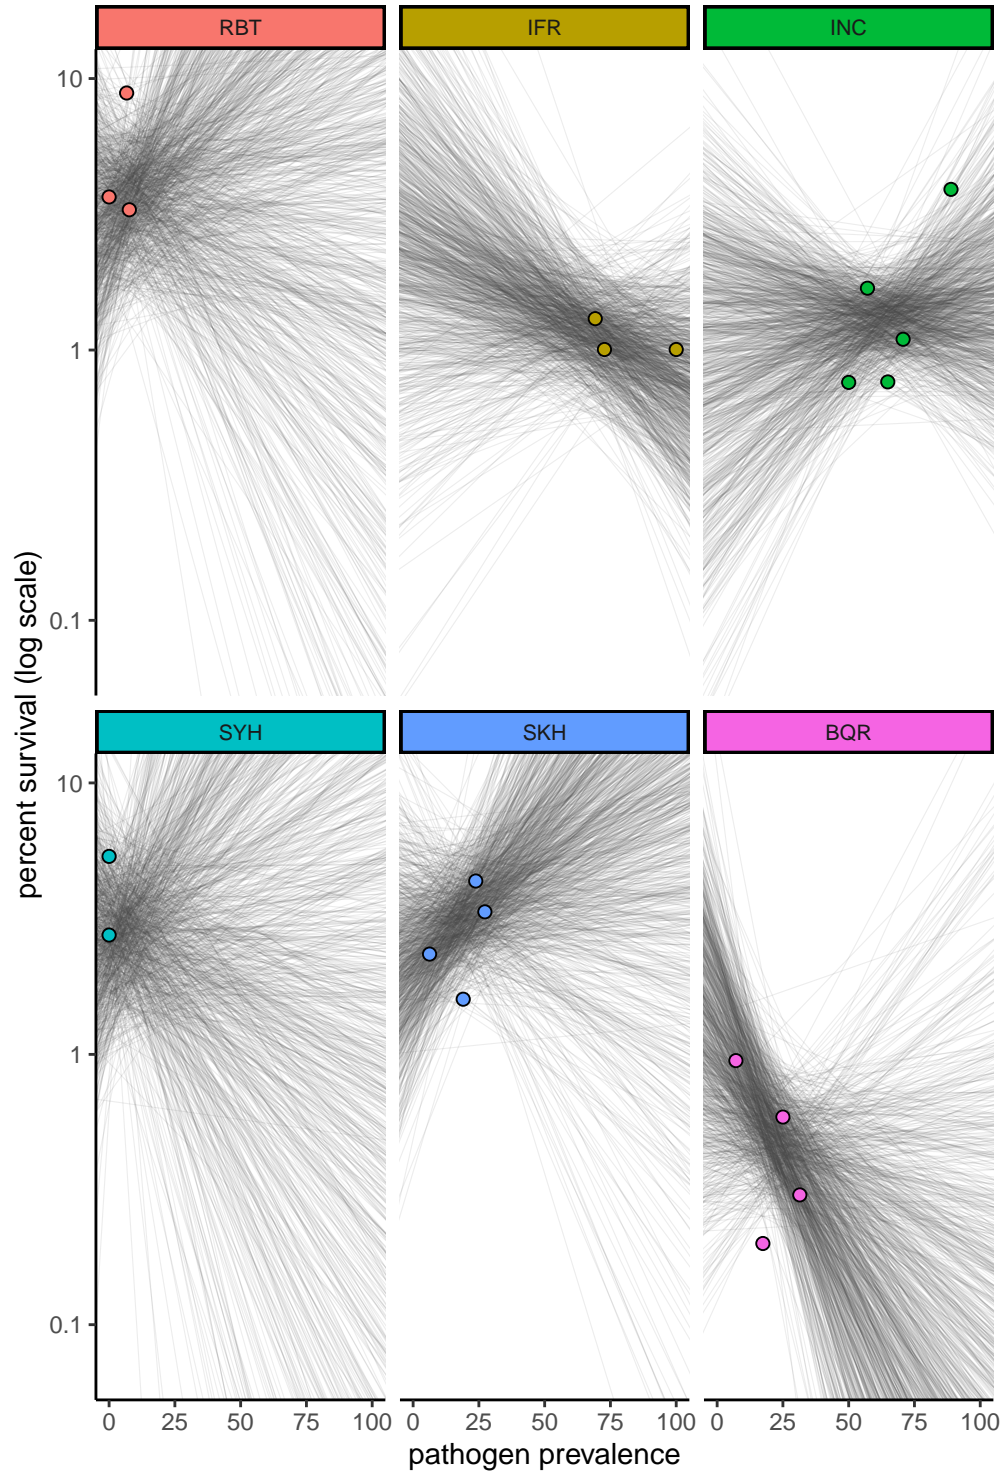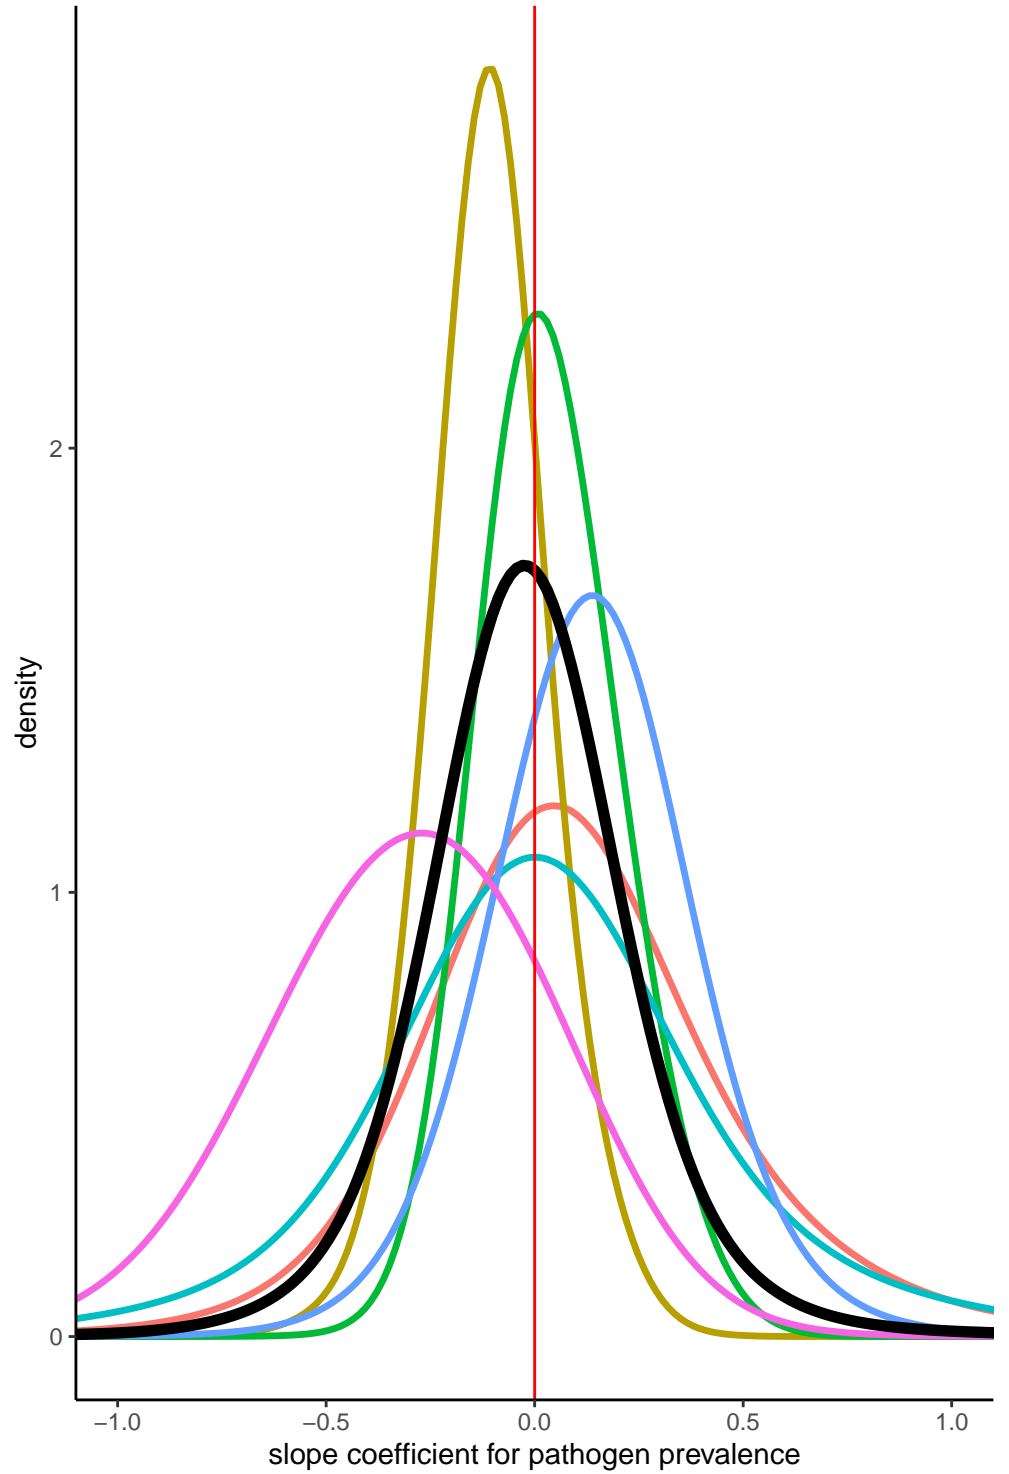

Parvicapsula pseudobranchicola SpSu

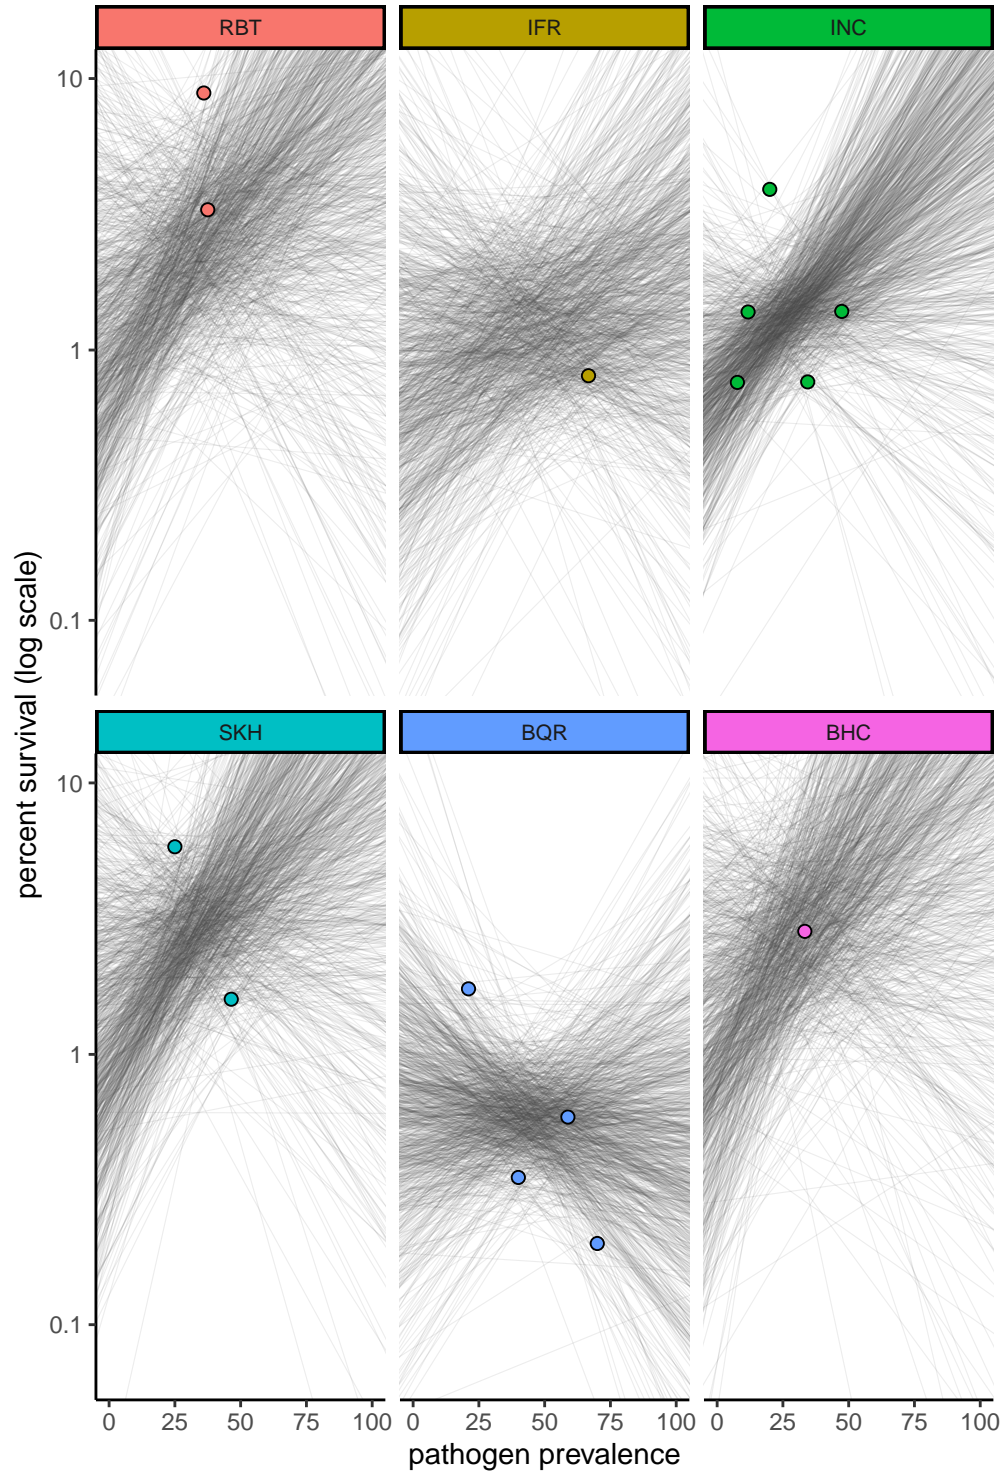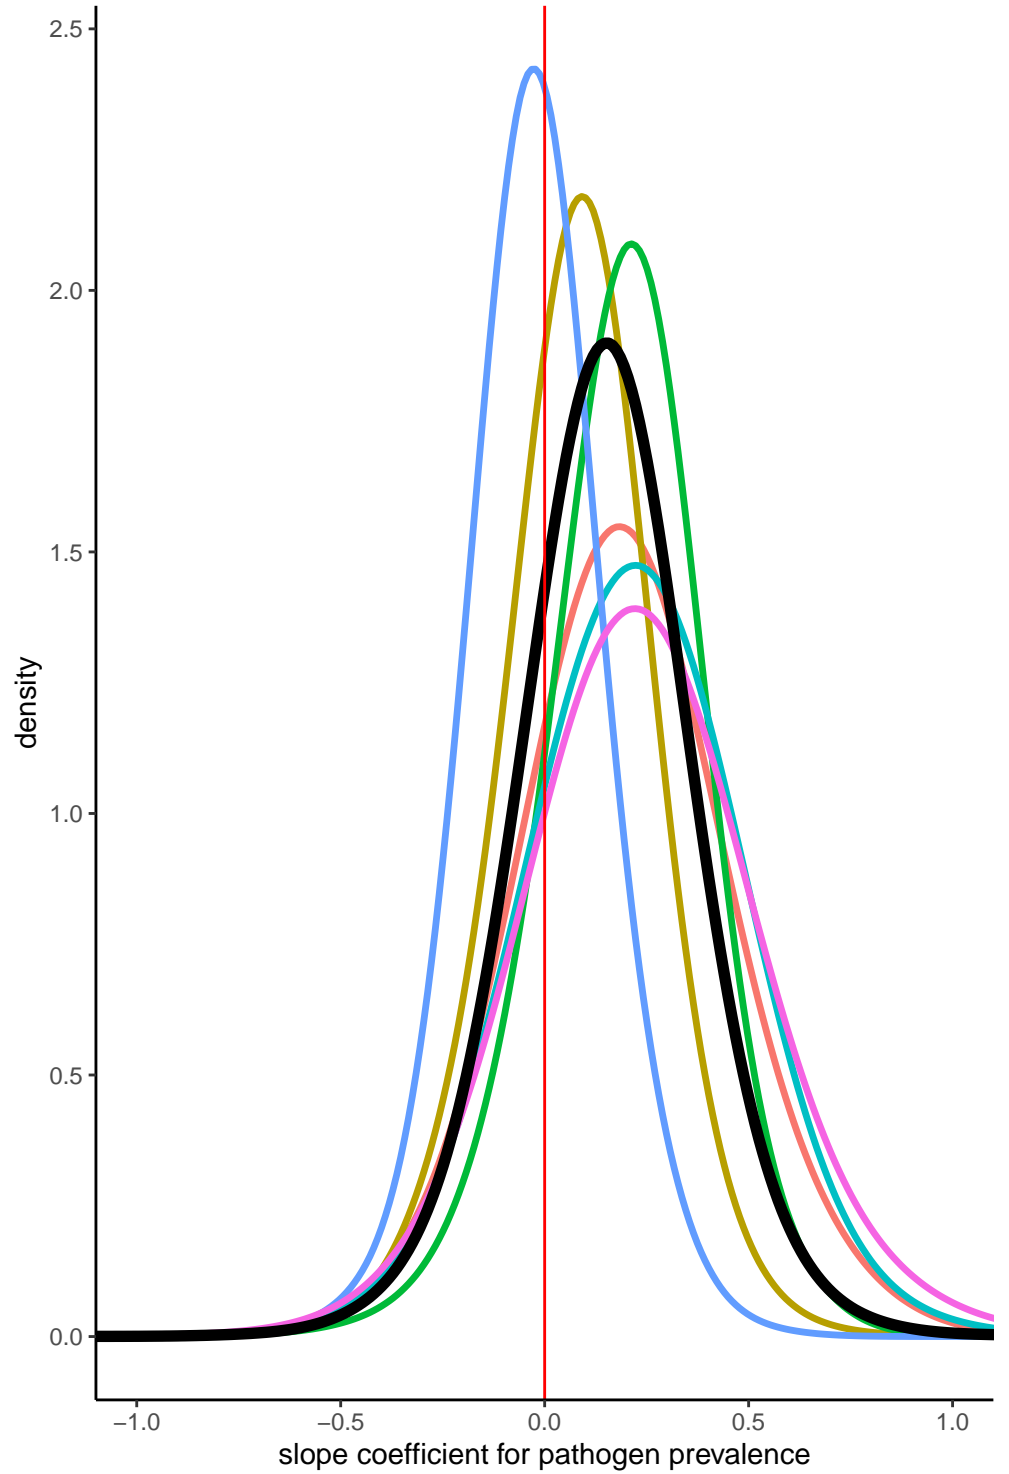



Parvicapsula pseudobranchicola FaWi

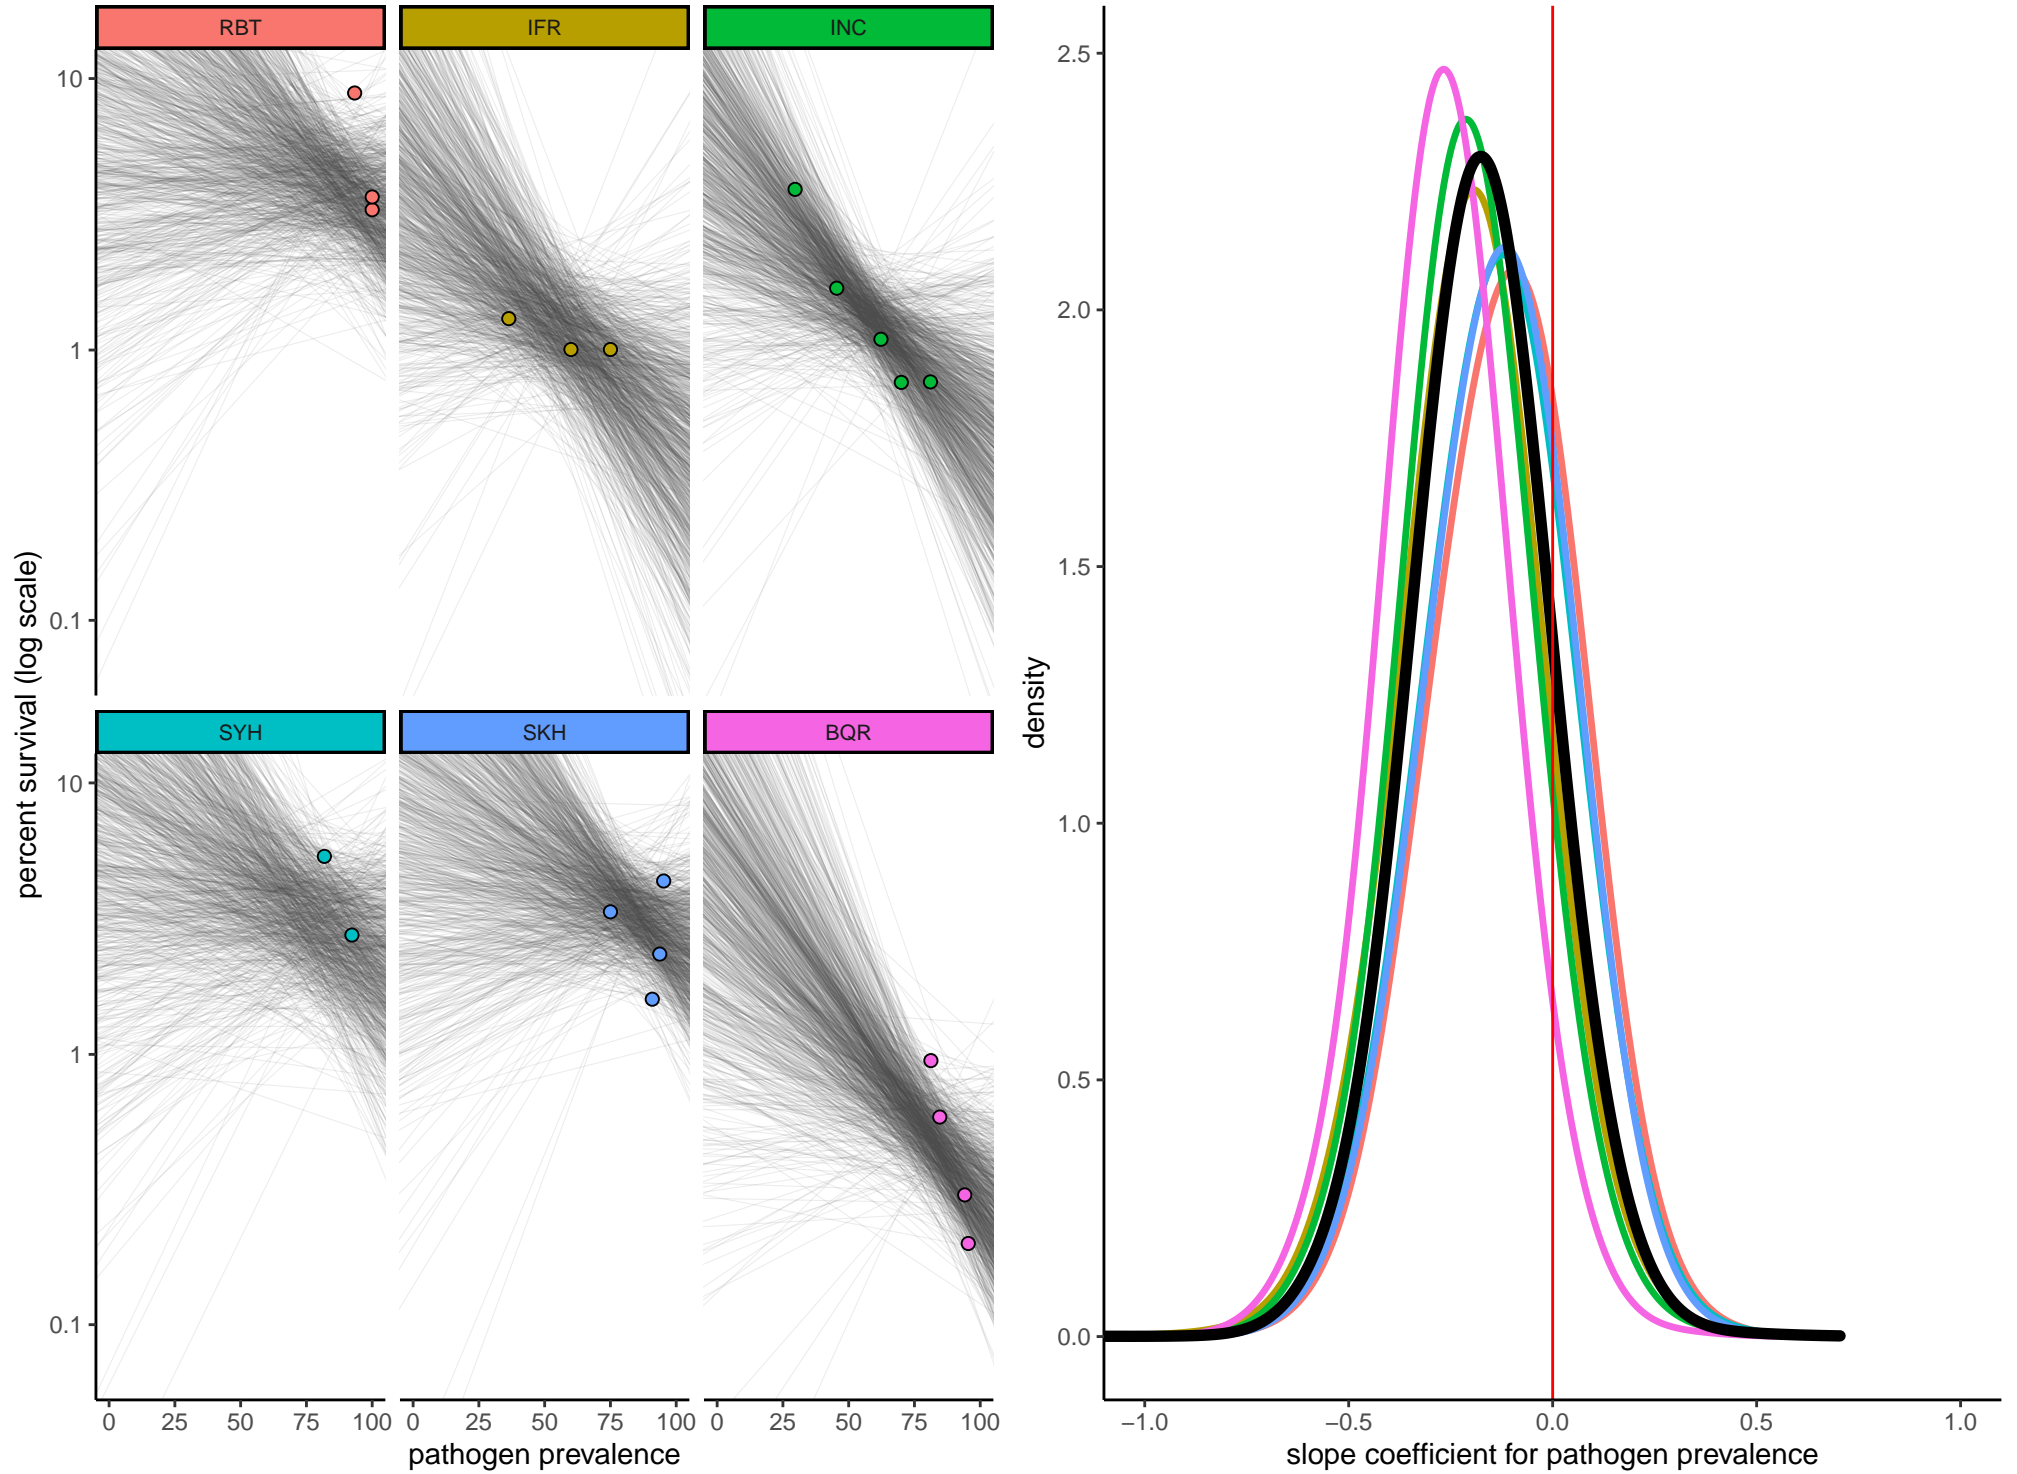

Paranucleospora theridion SpSu

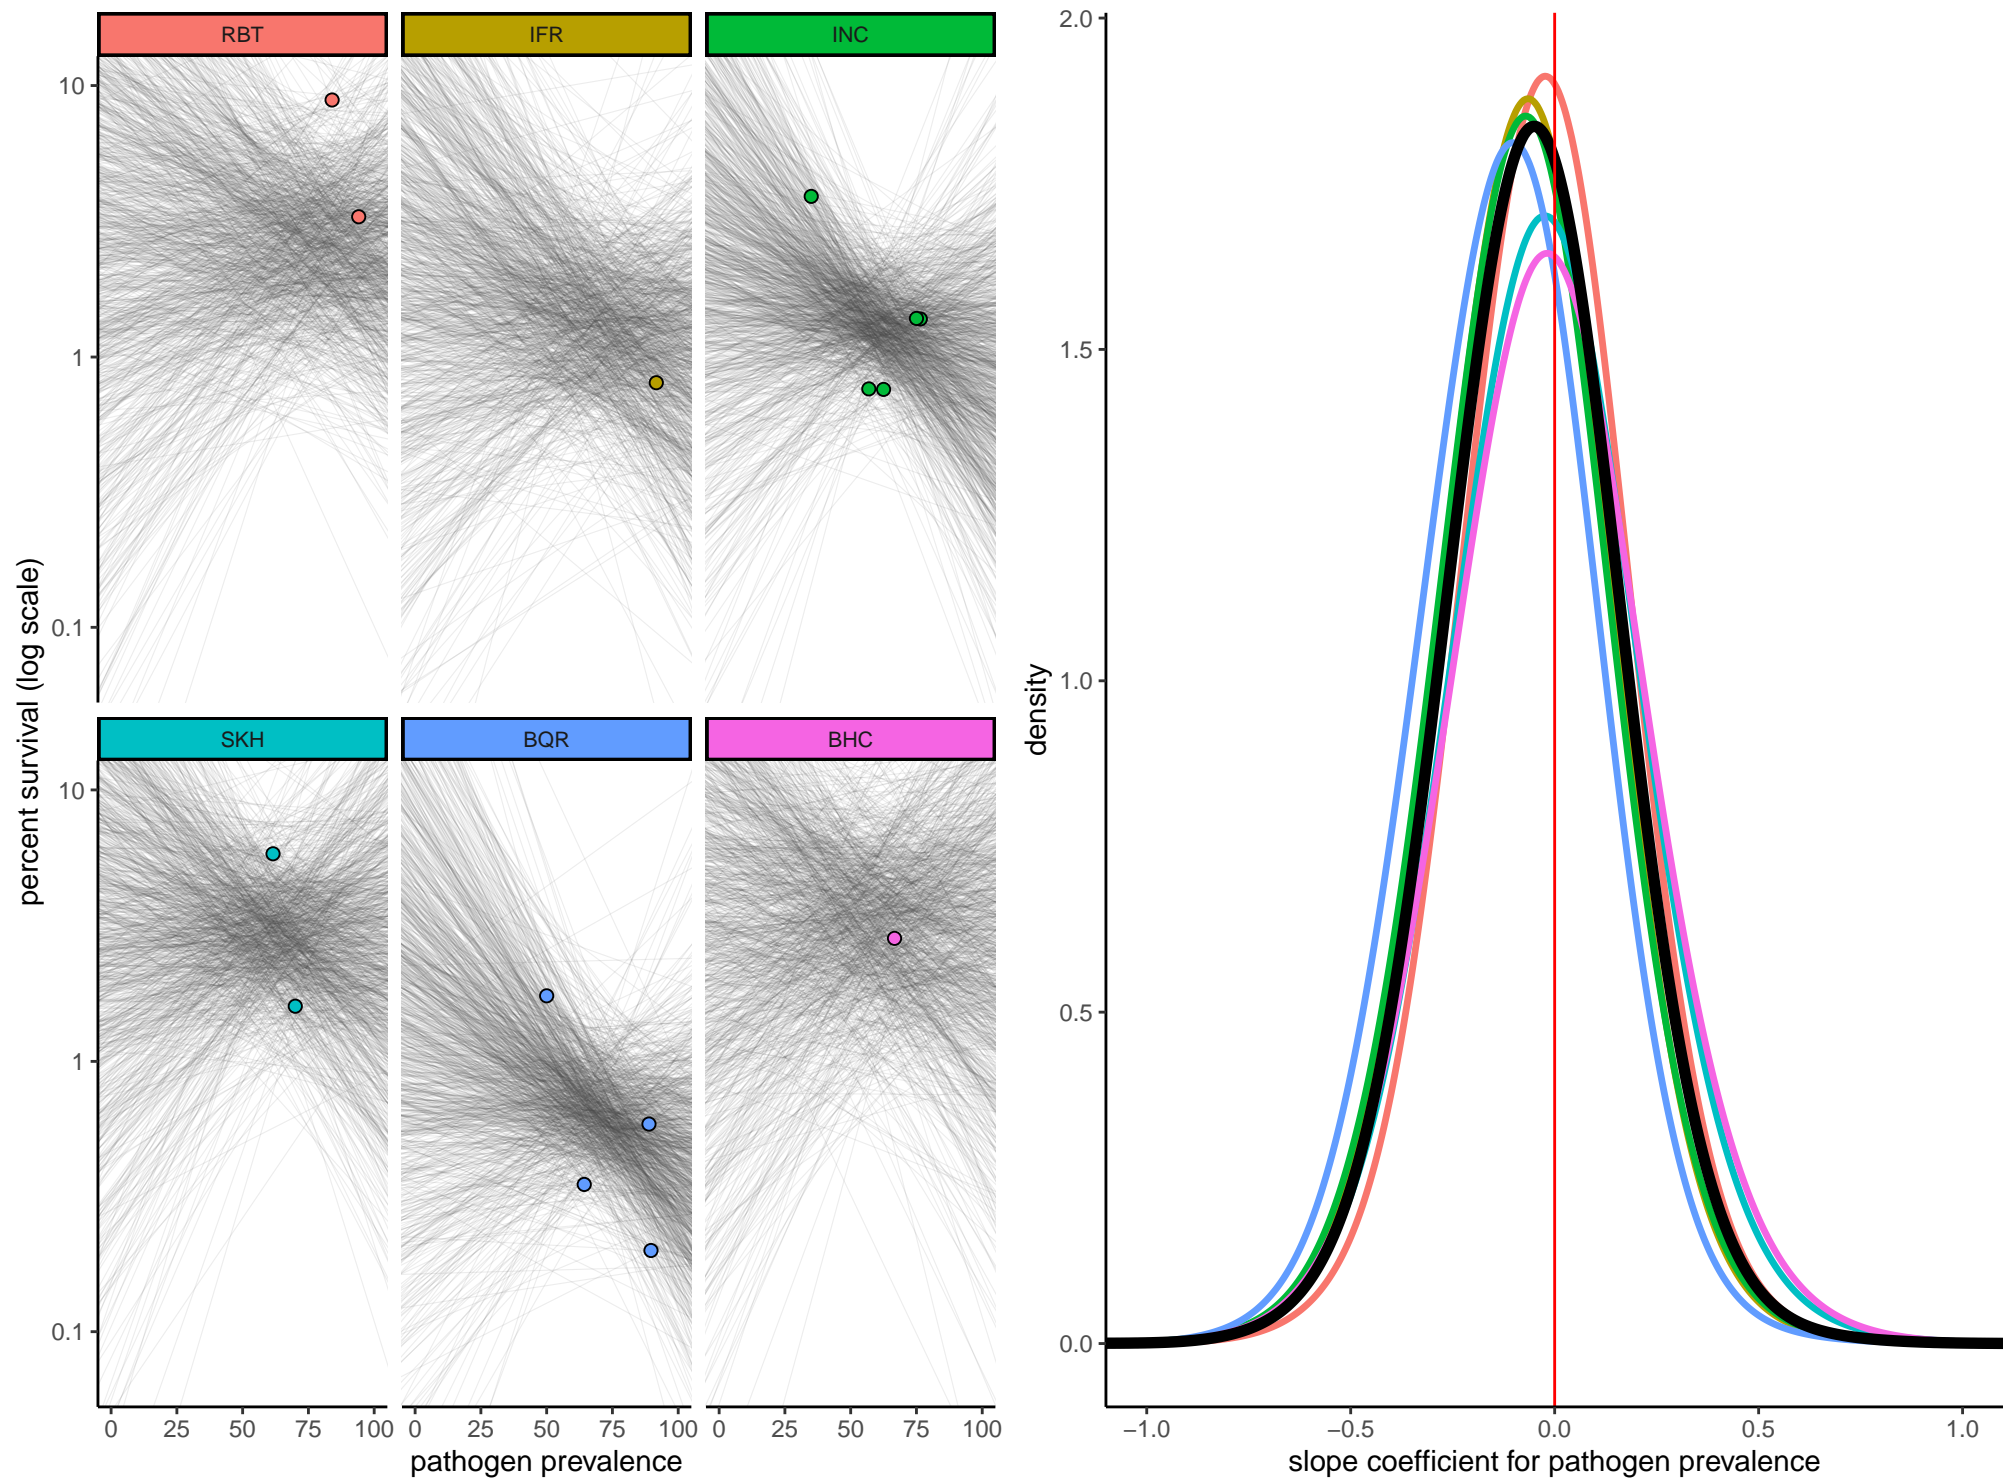



Paranucleospora theridion FaWi

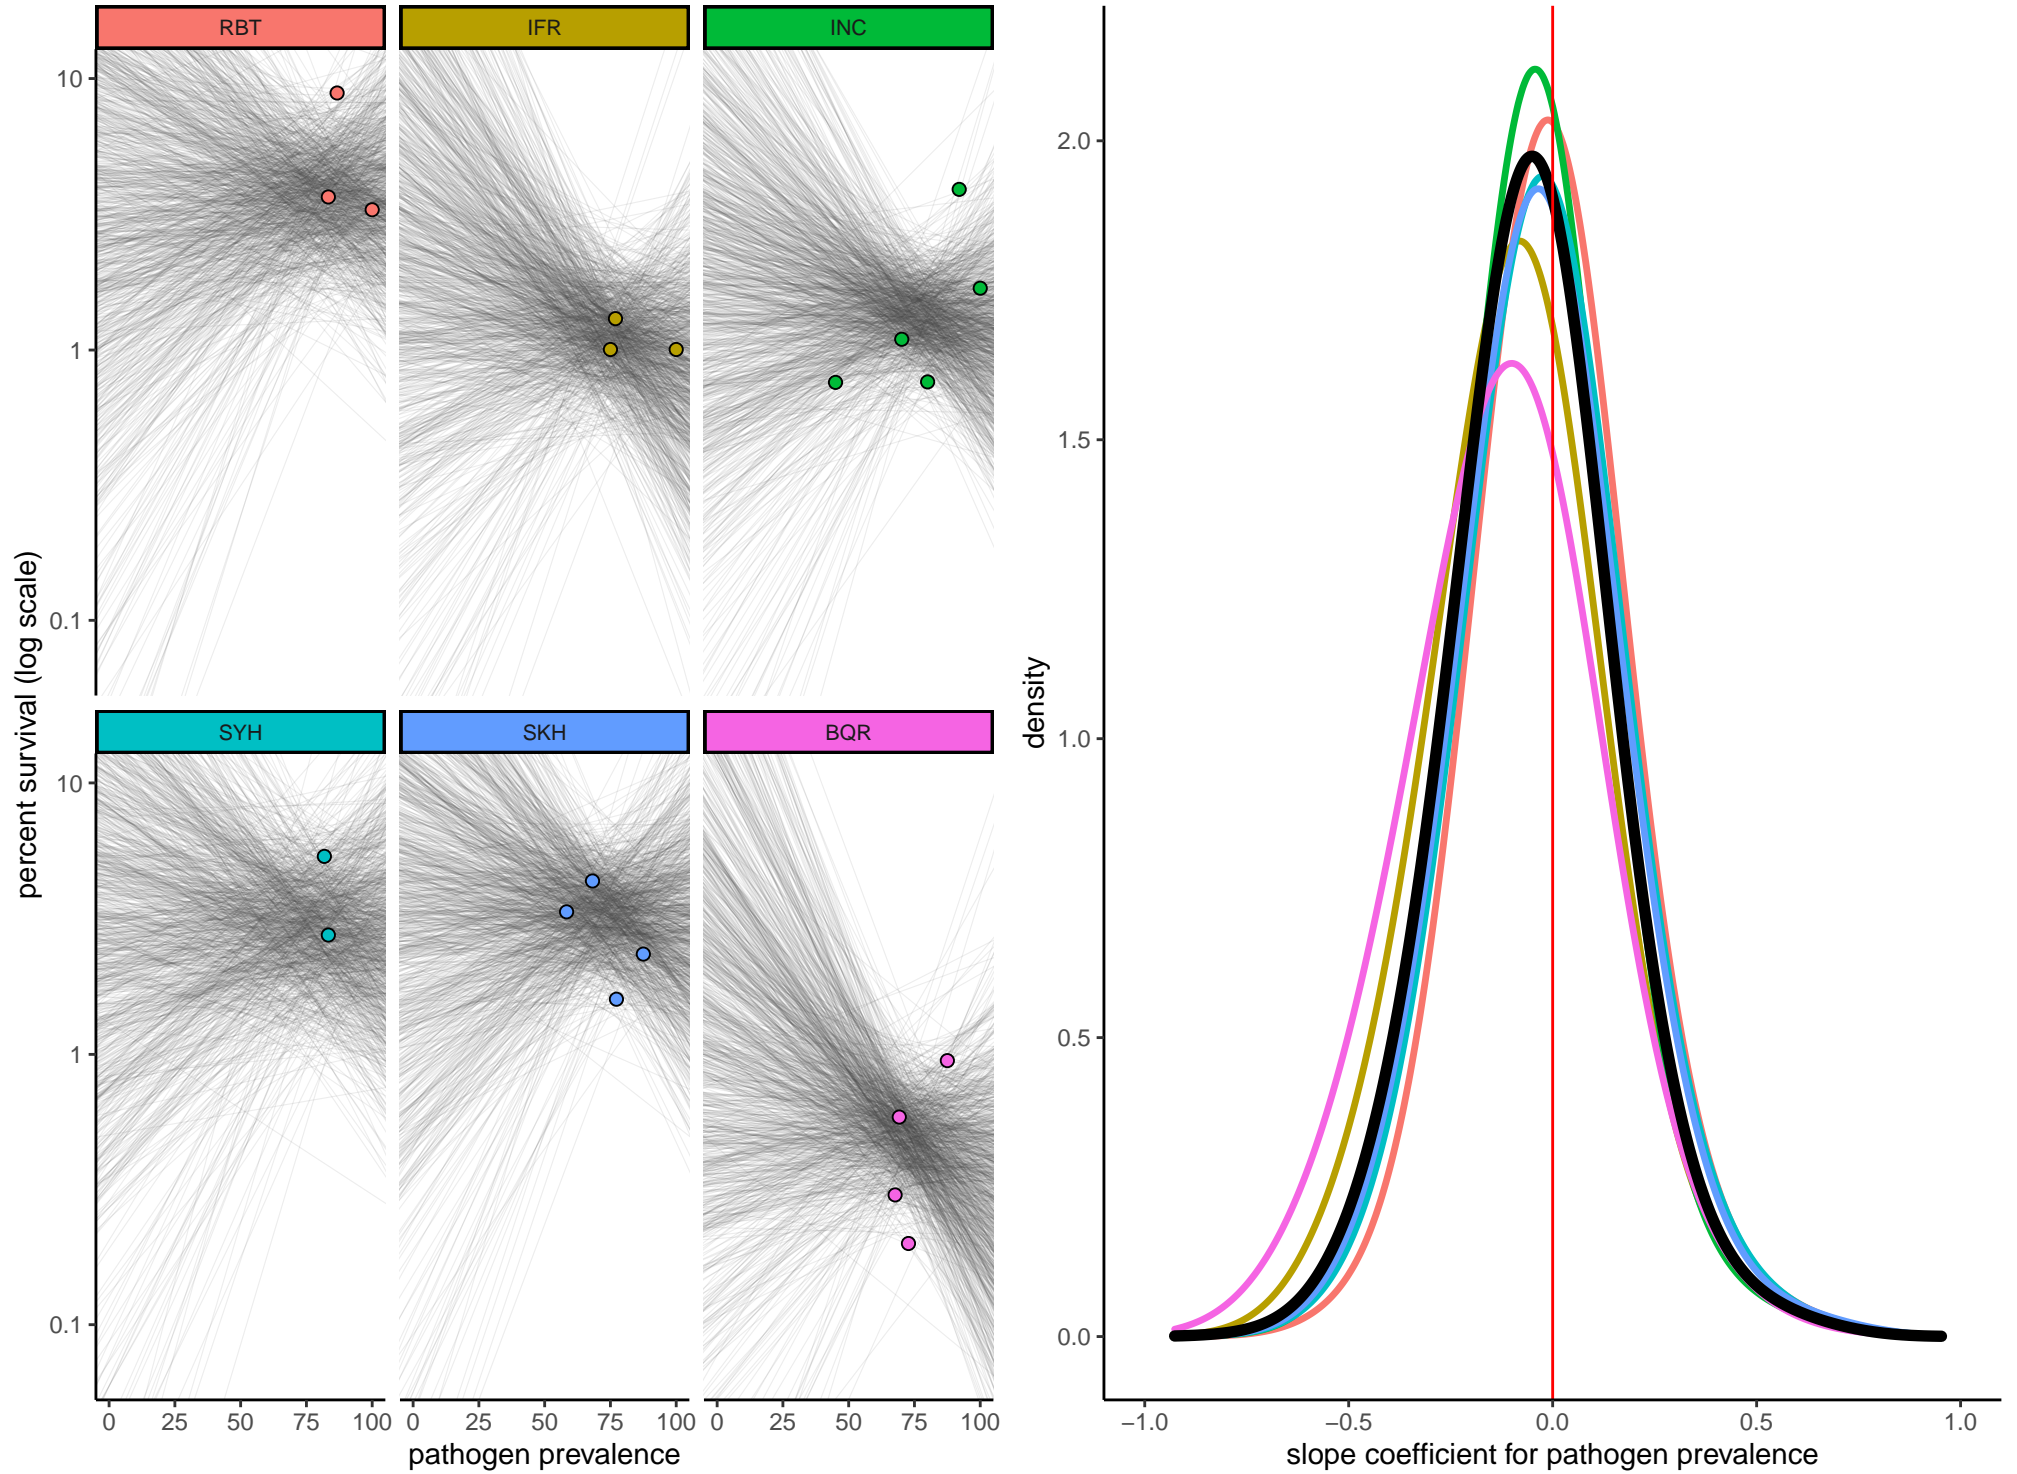

Piscine Orthoreovirus SpSu

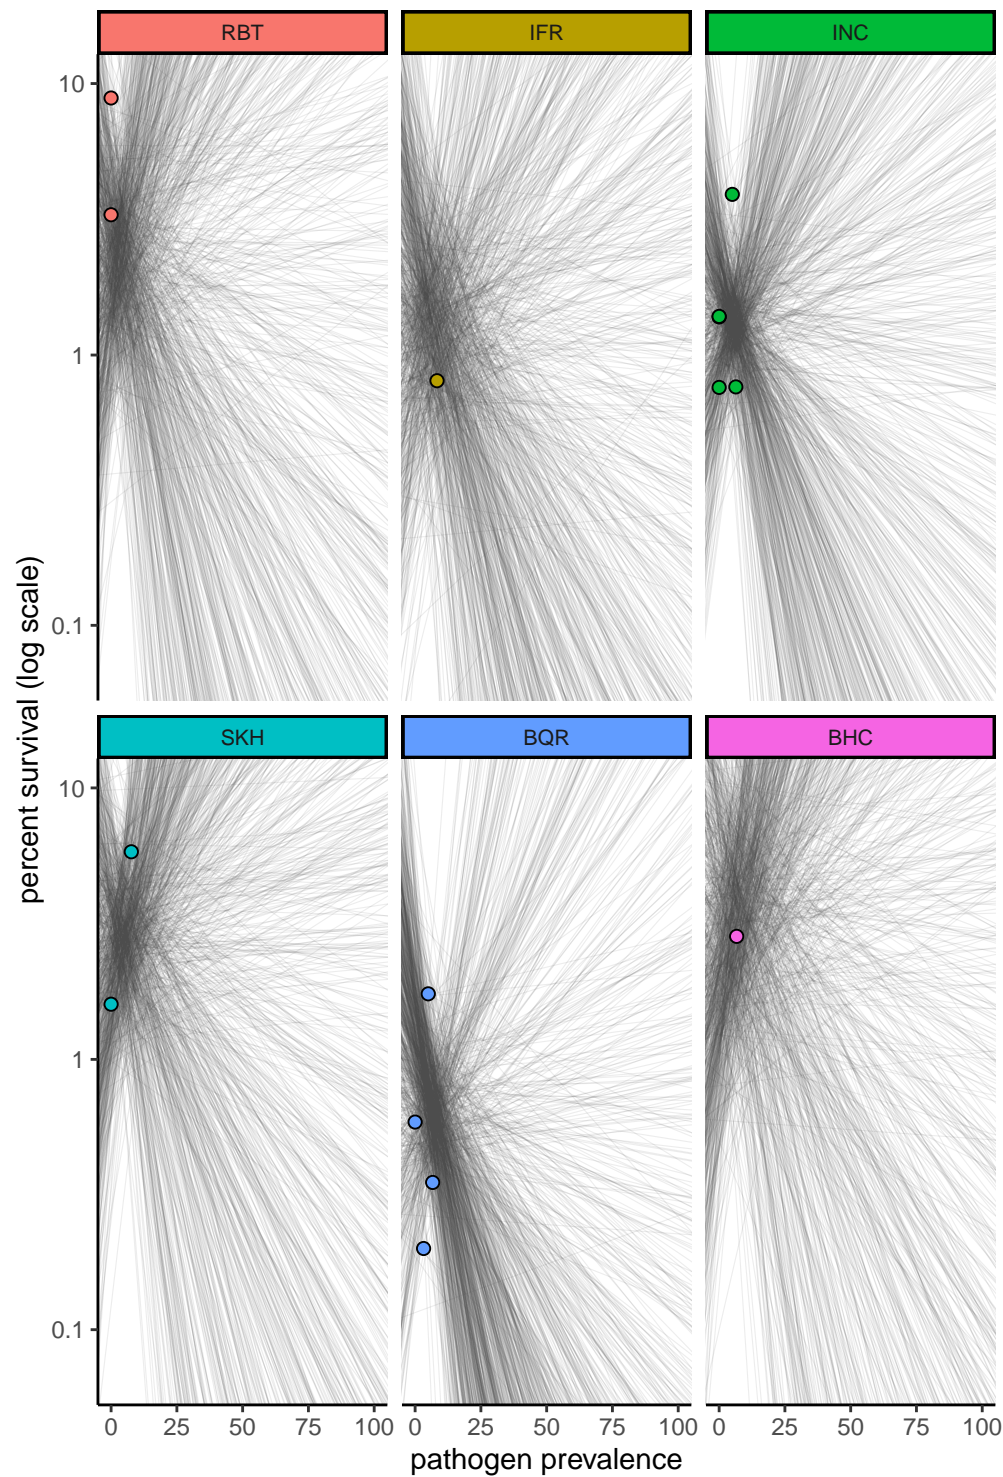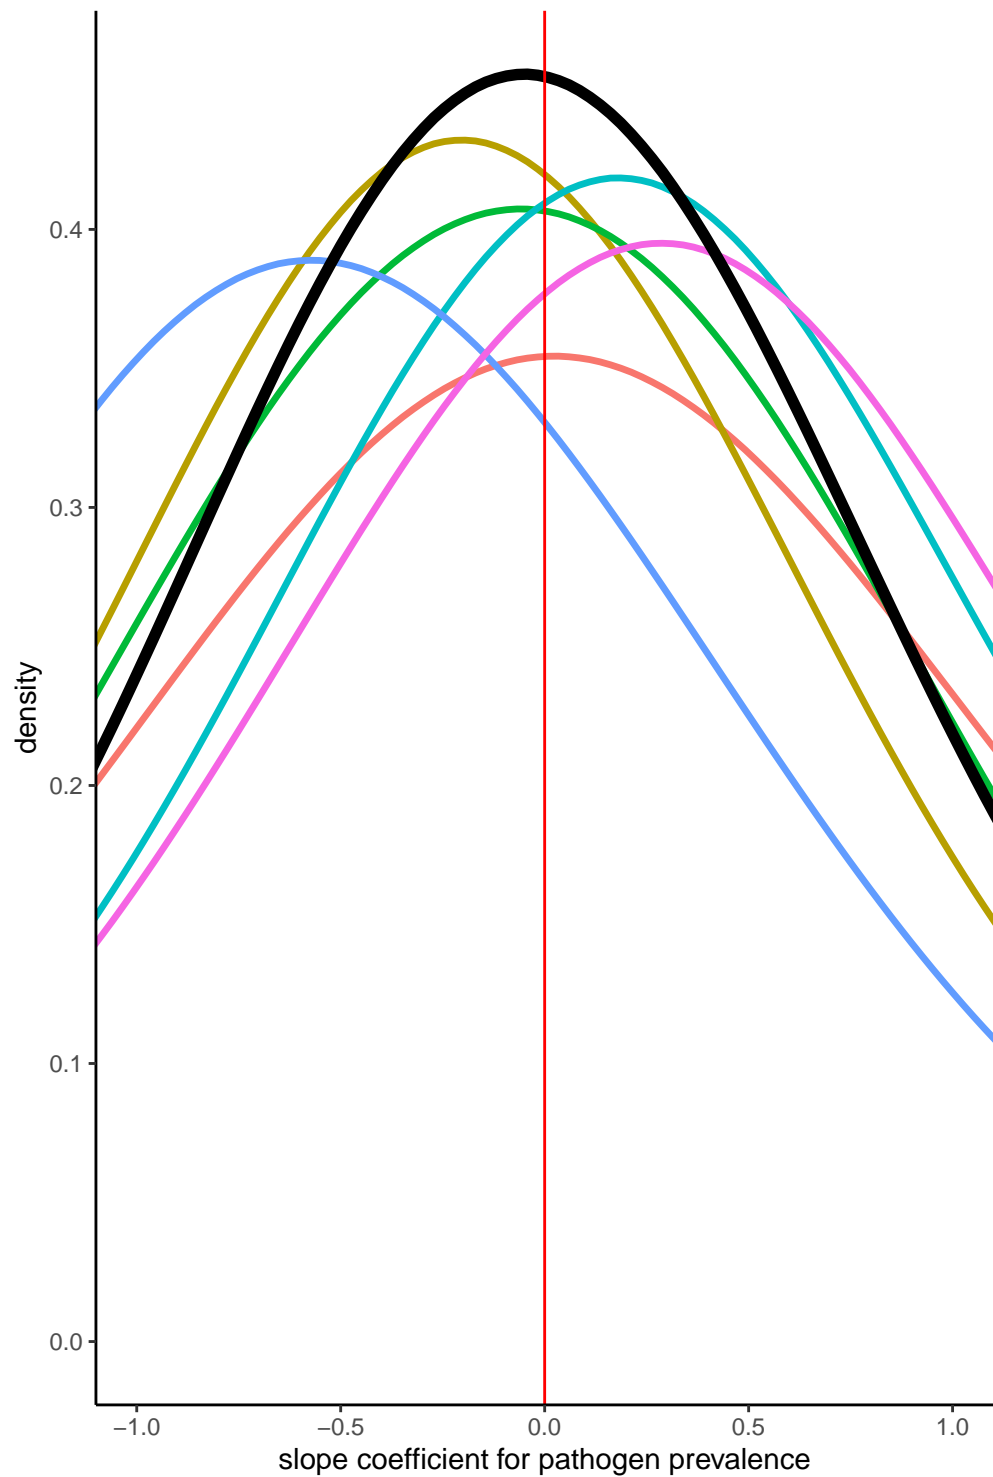



Piscine Orthoreovirus FaWi

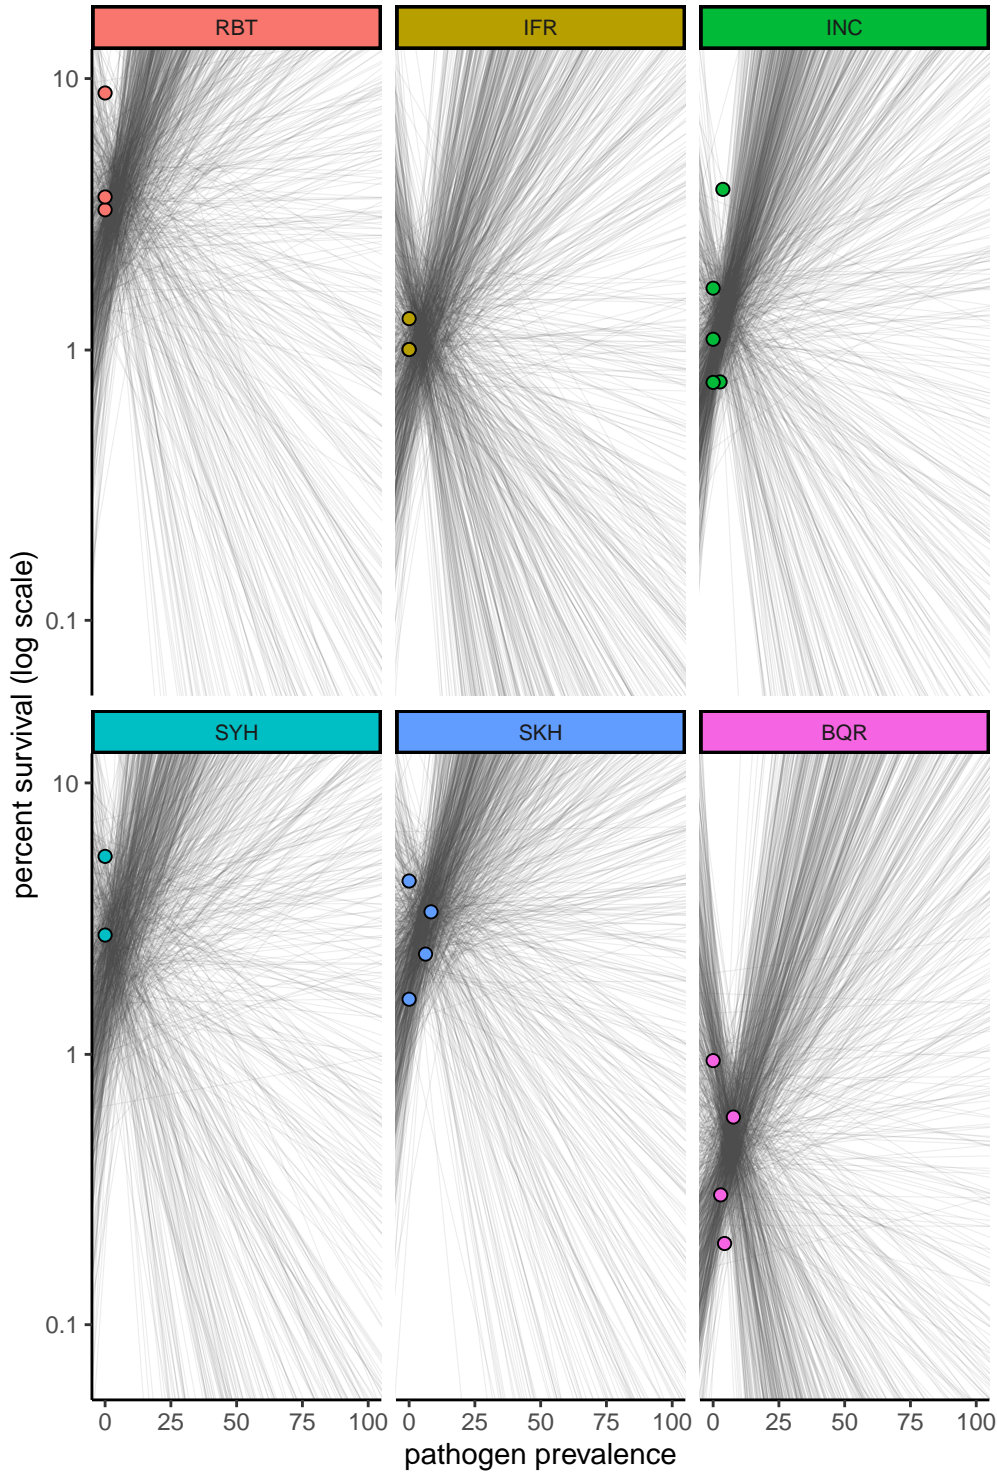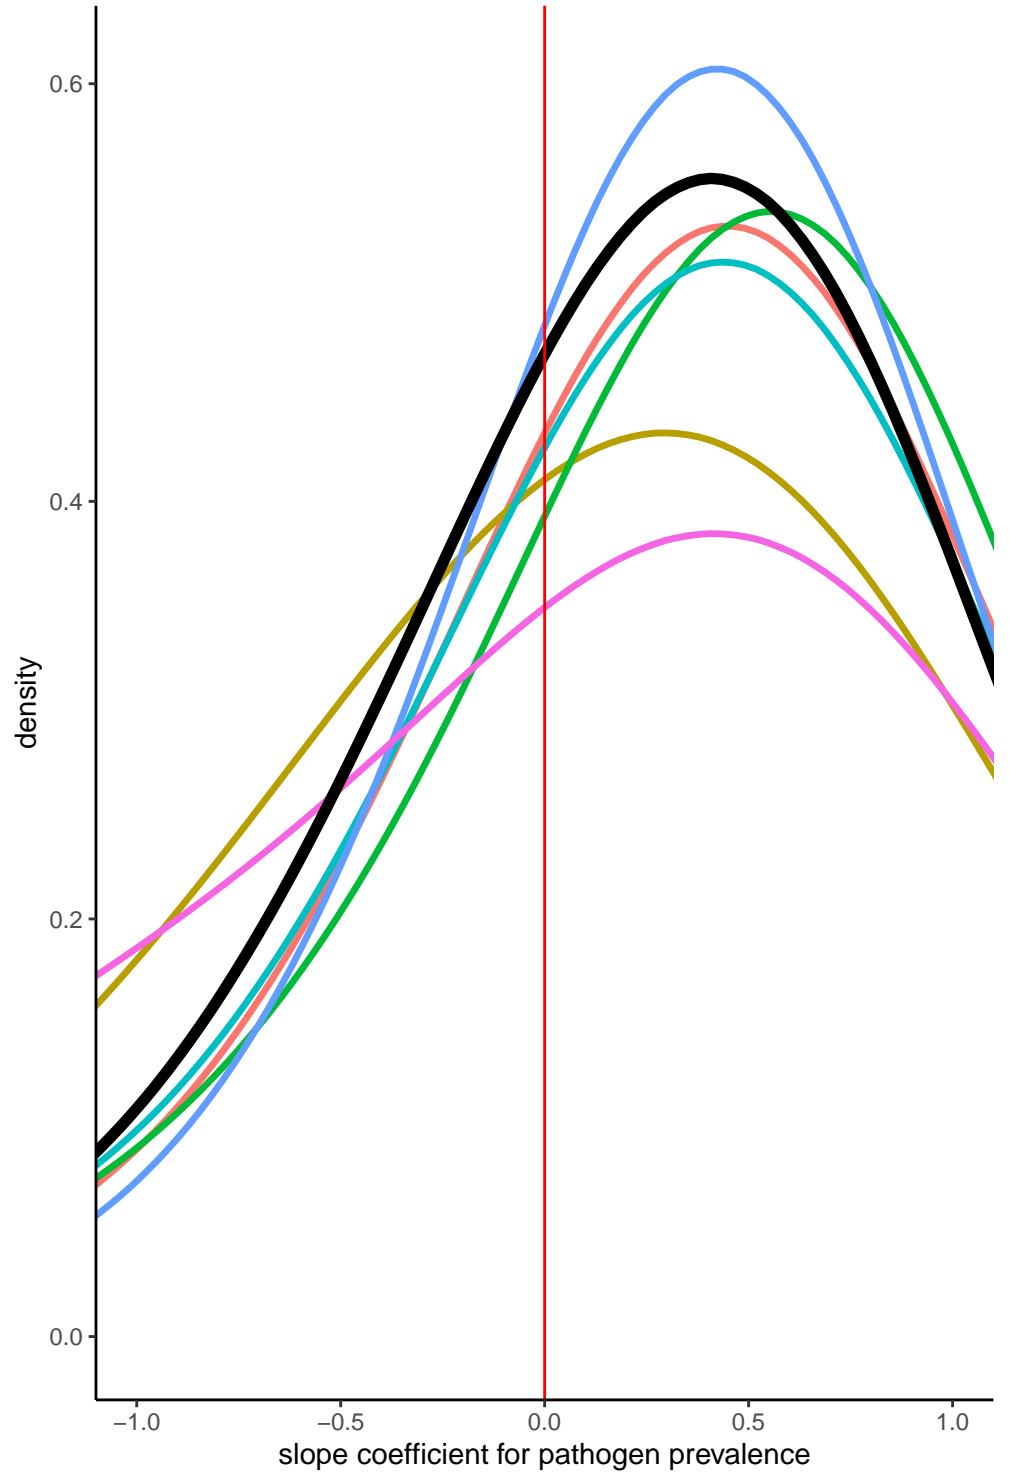

Candidatus Syngnamydia salmonis SpSu

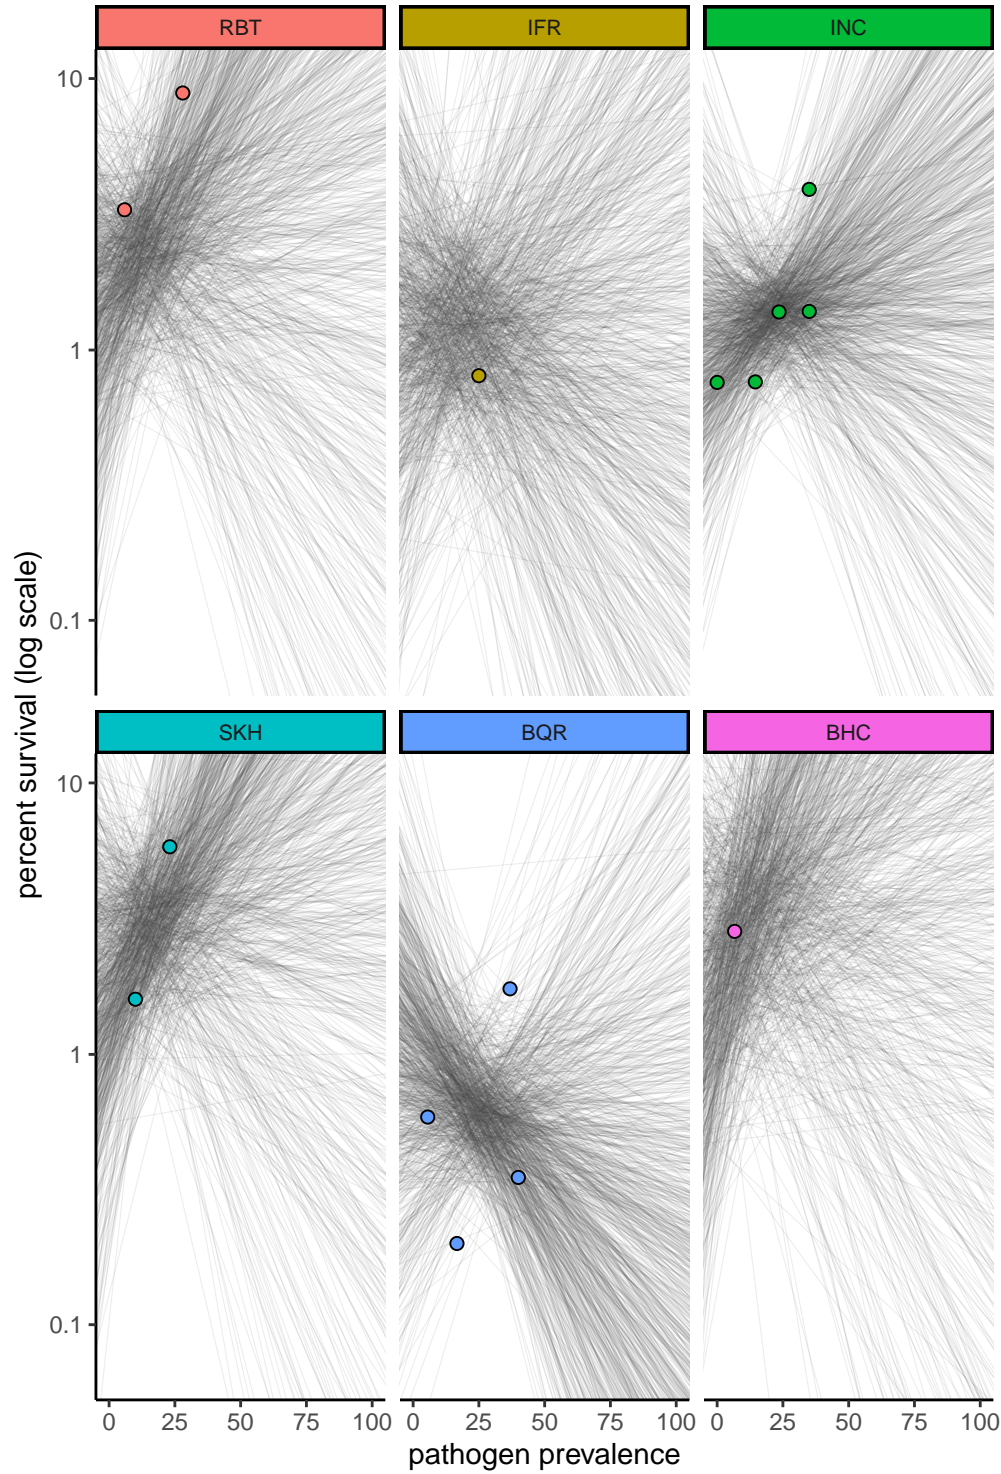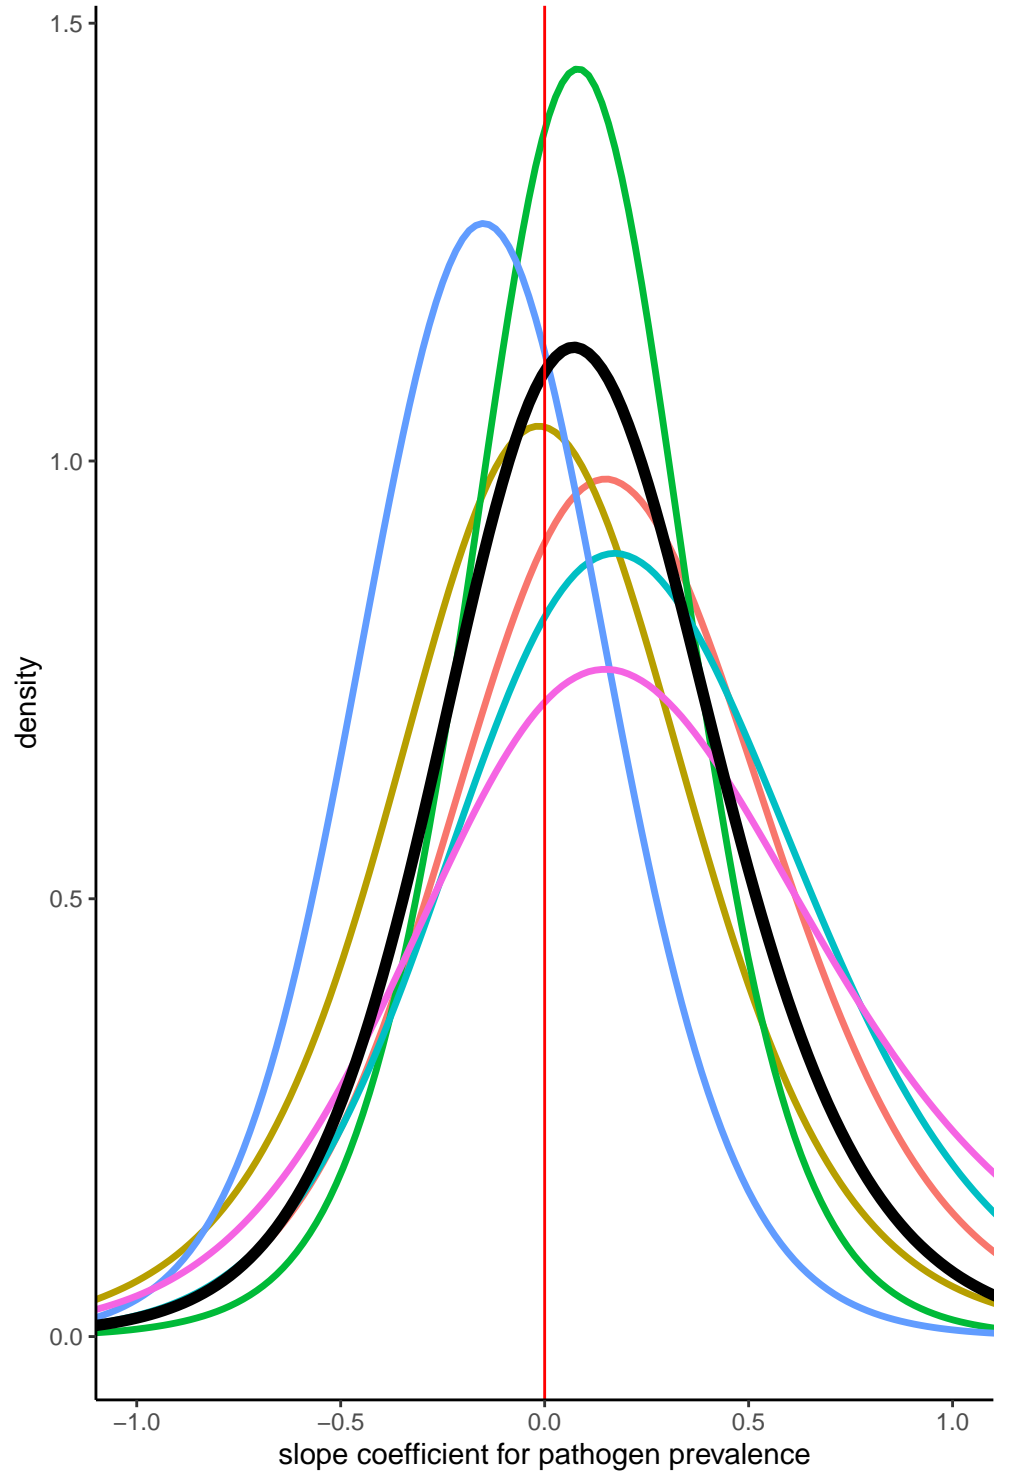



Candidatus Syngnamydia salmonis FaWi

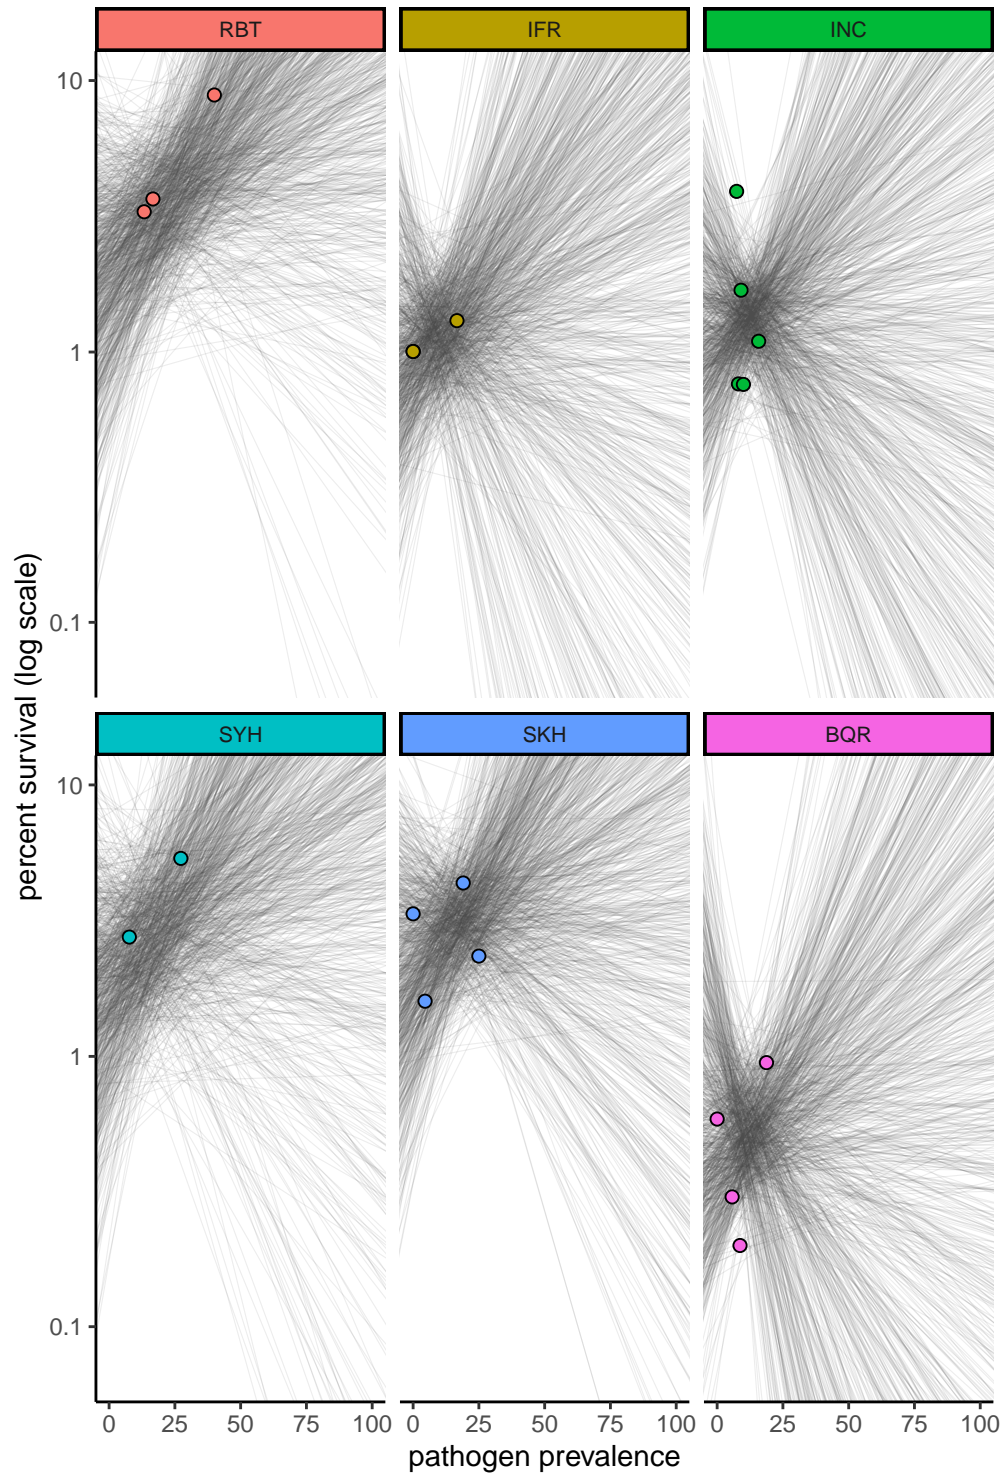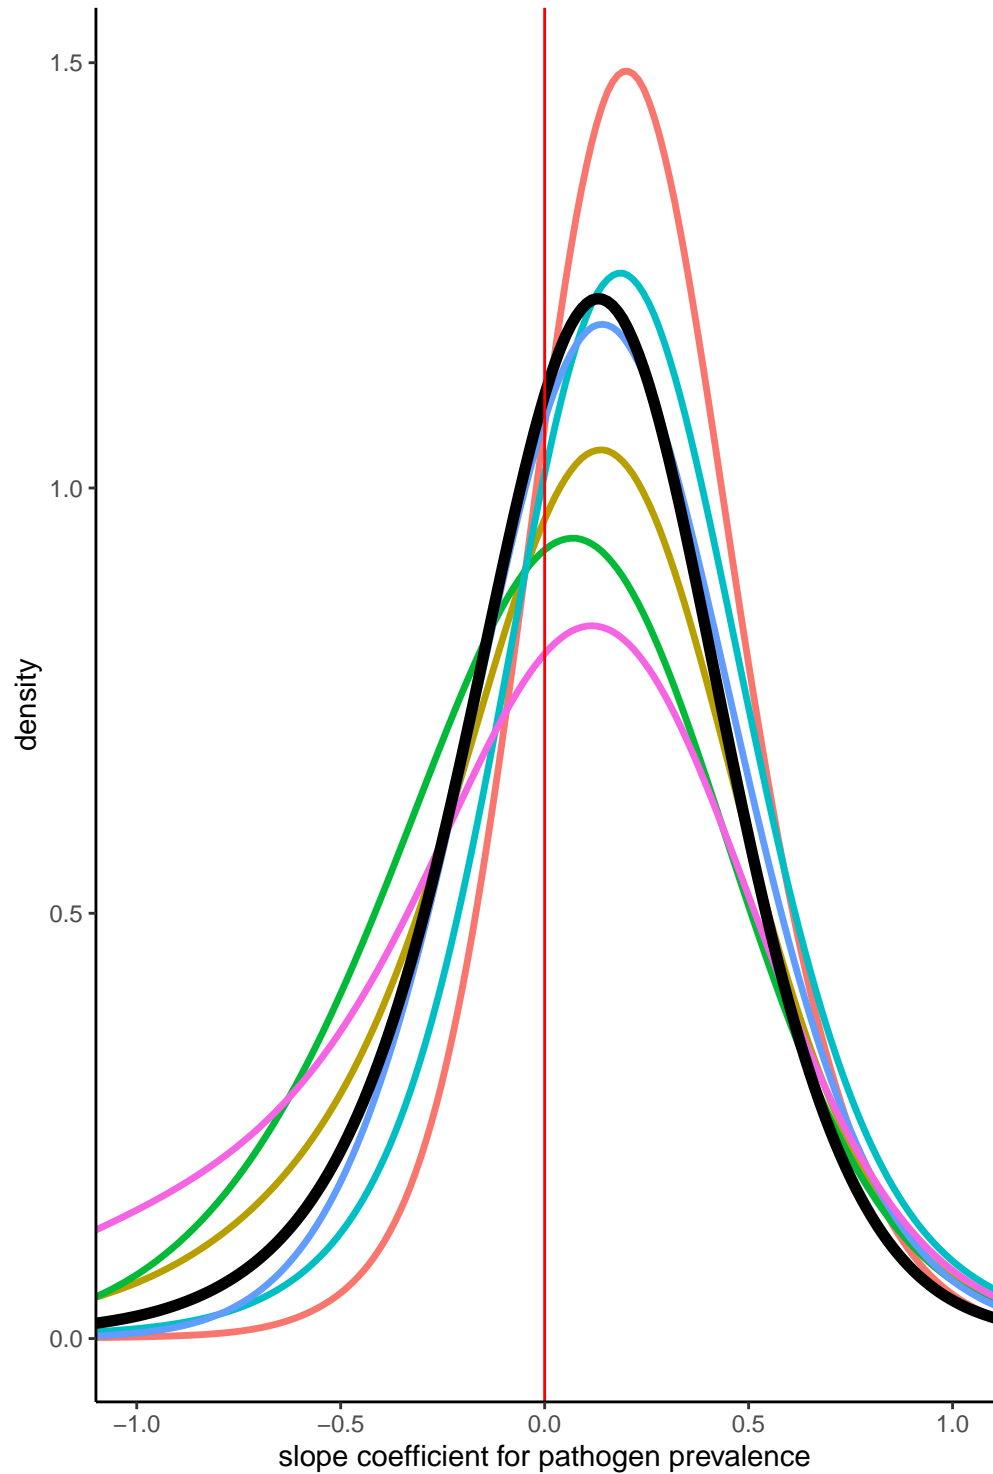

*Sphaerothecum destruens* SpSu

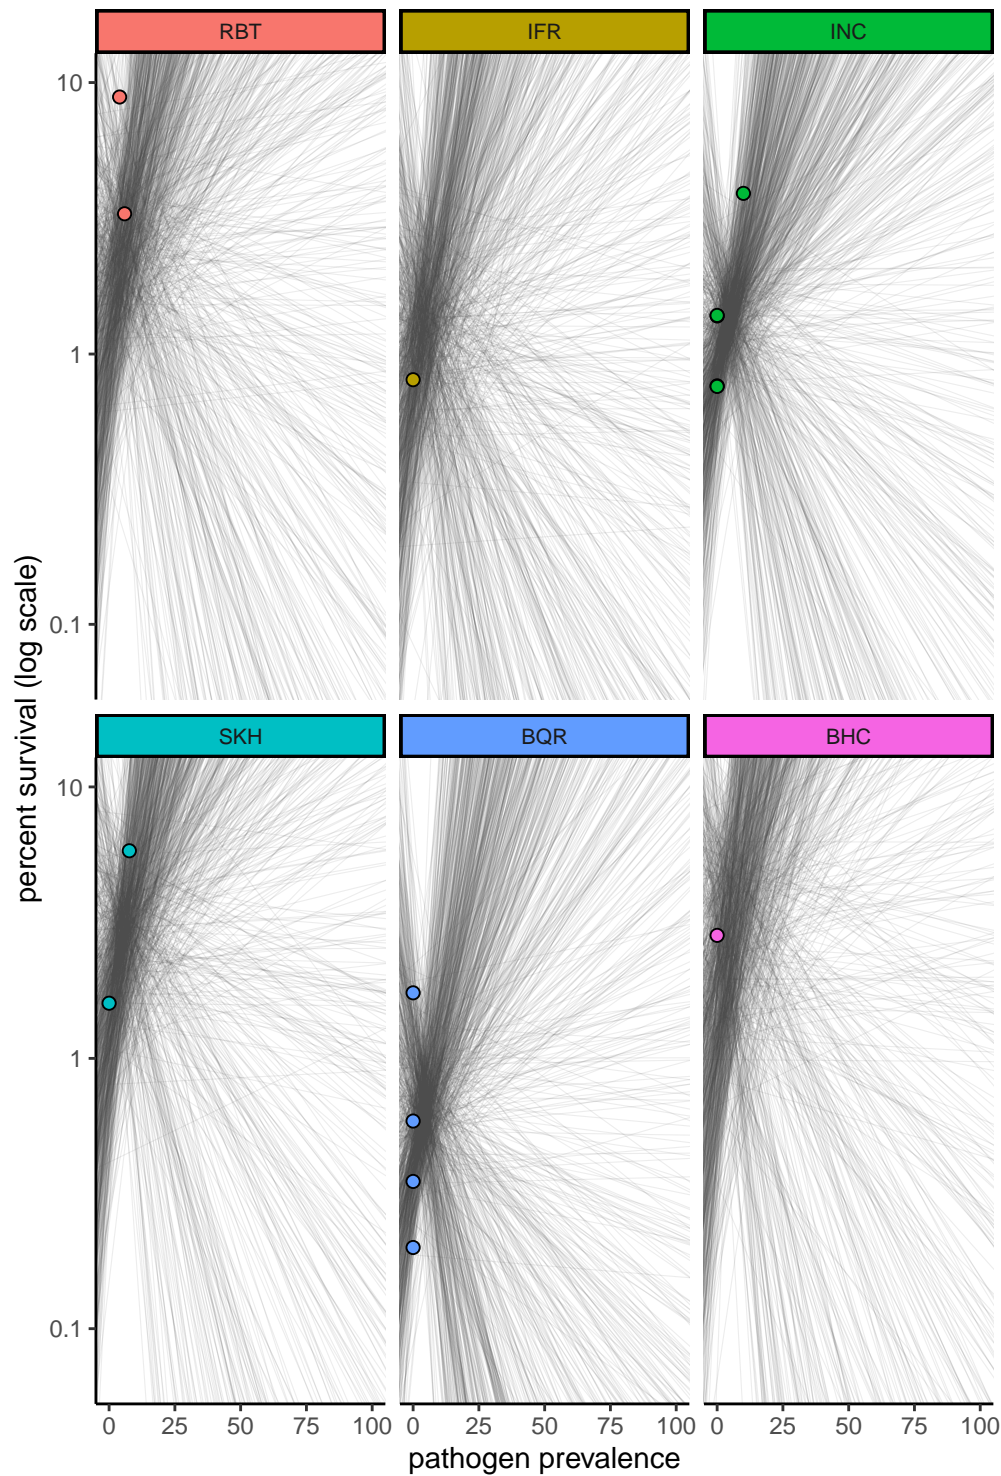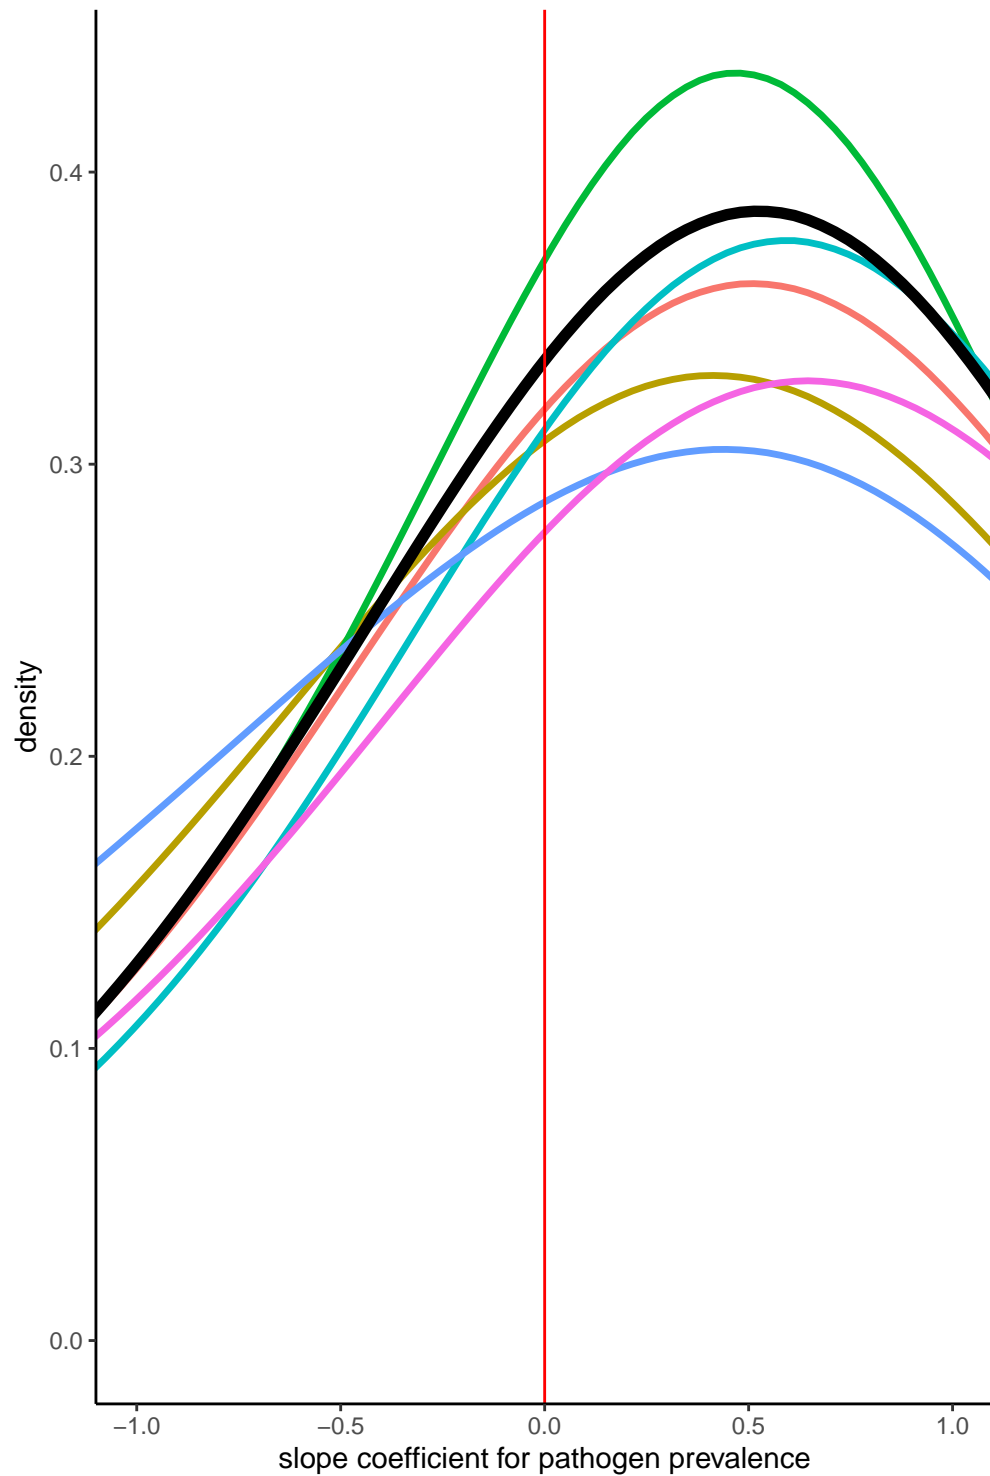



*Sphaerothecum destruens* FaWi

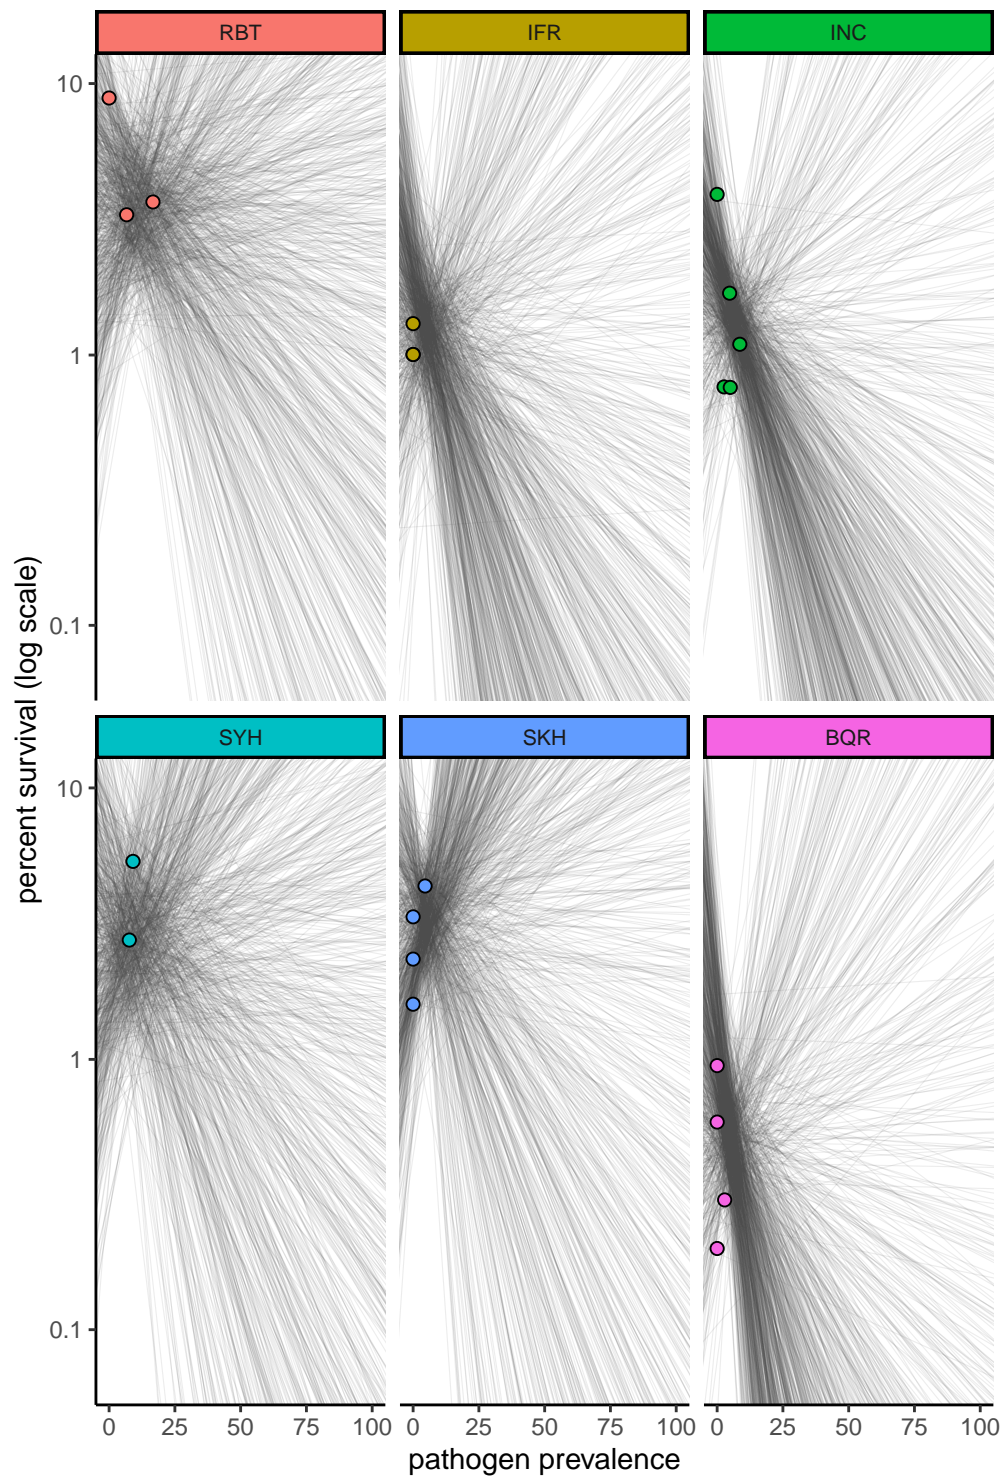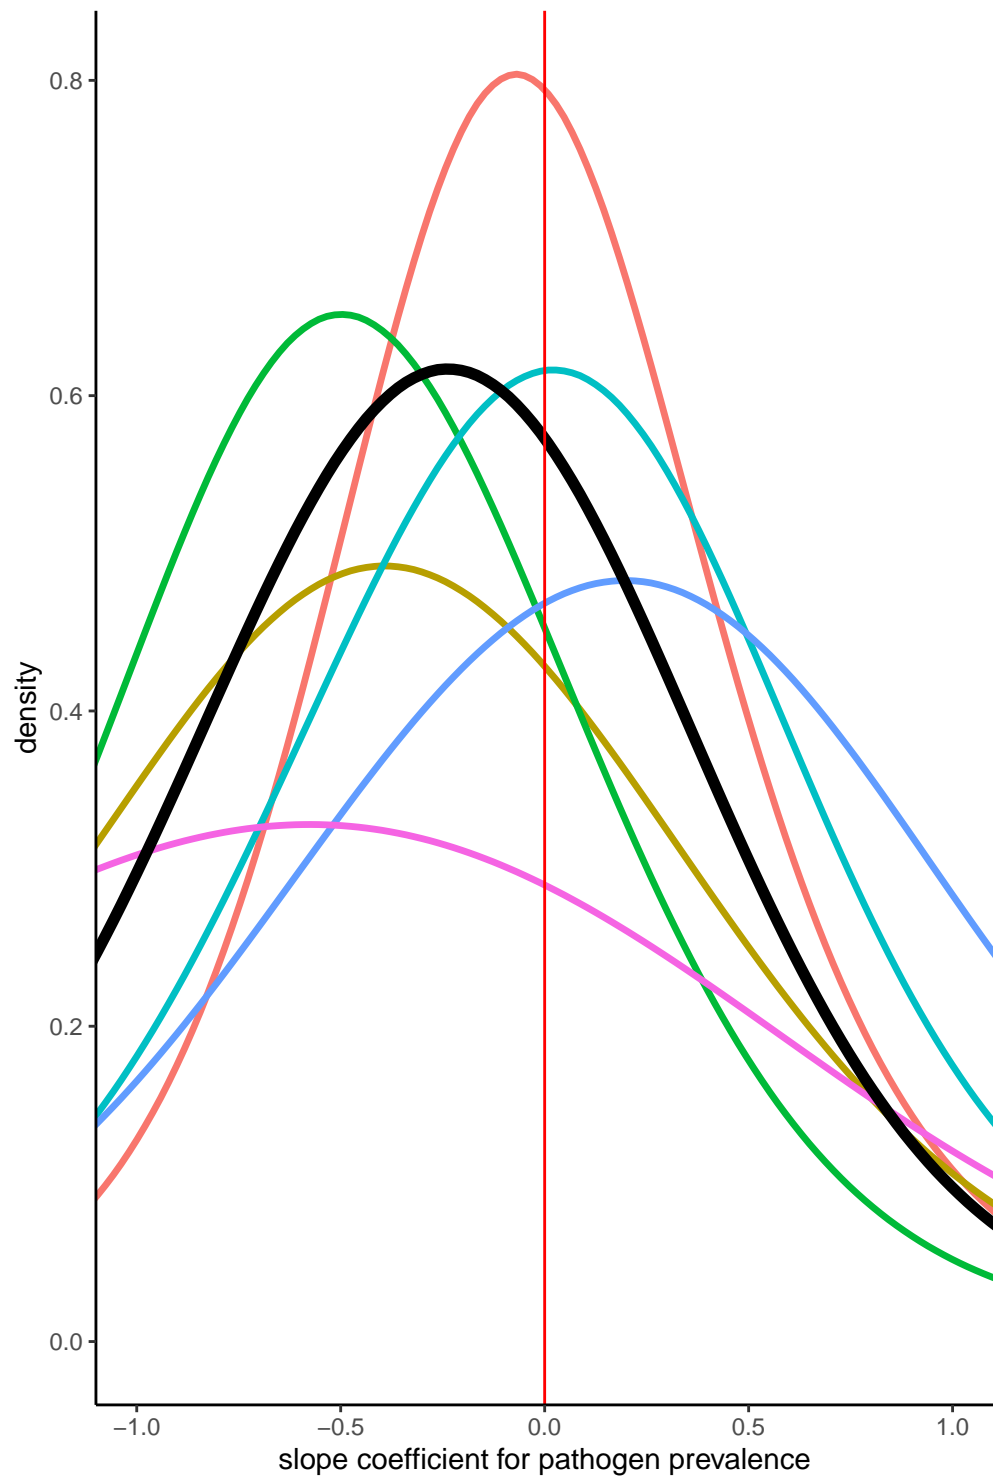

*Tetracapsuloides bryosalmonae* SpSu

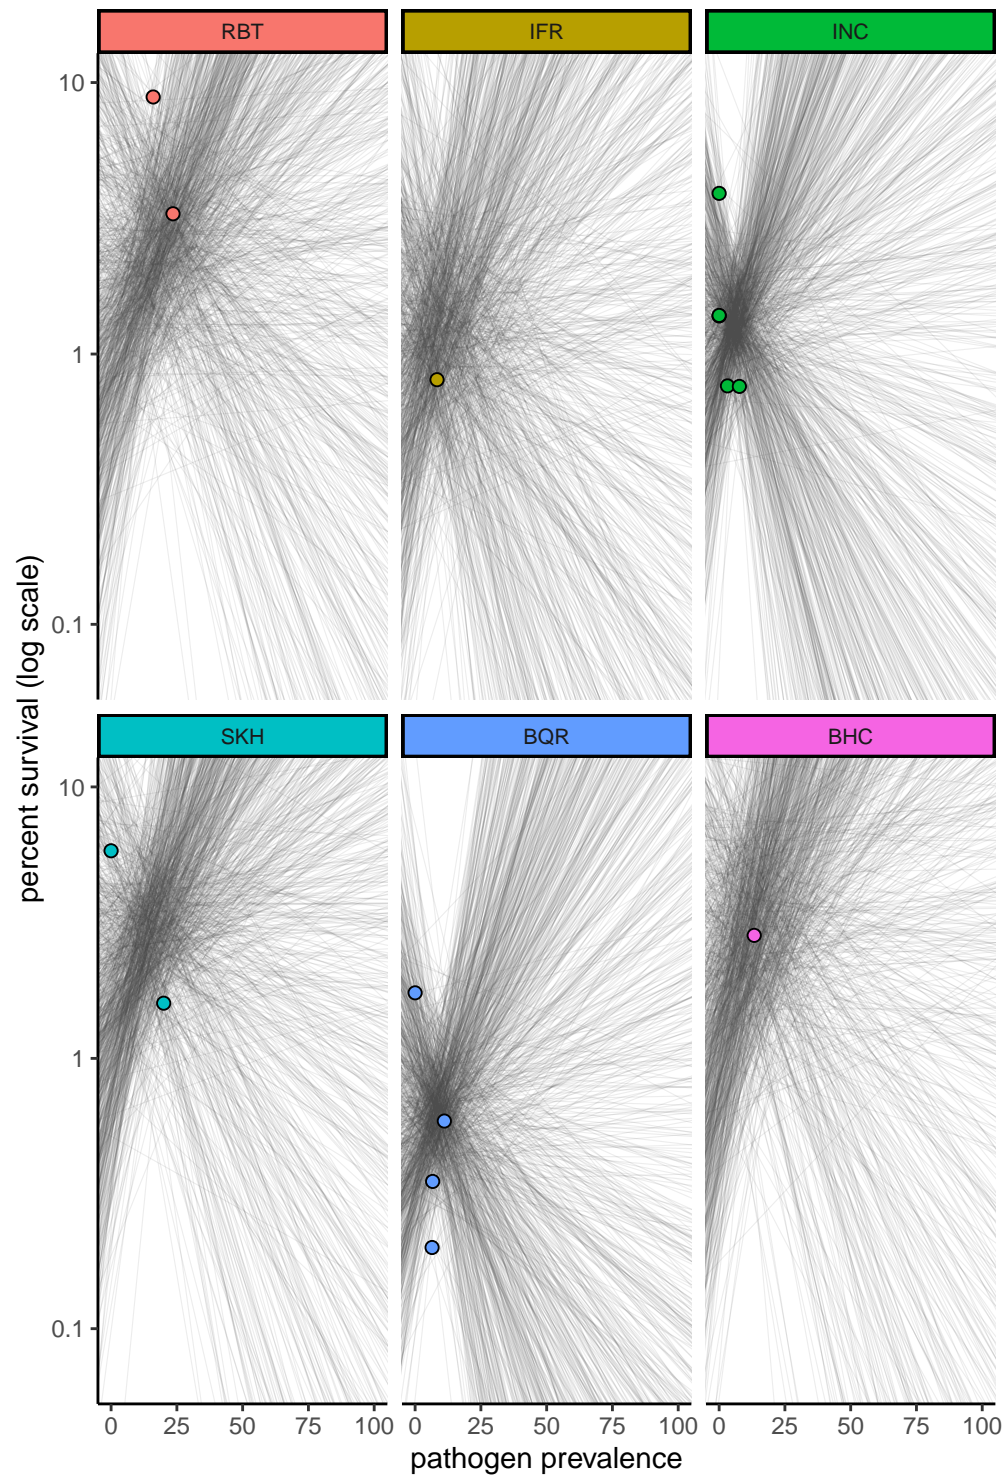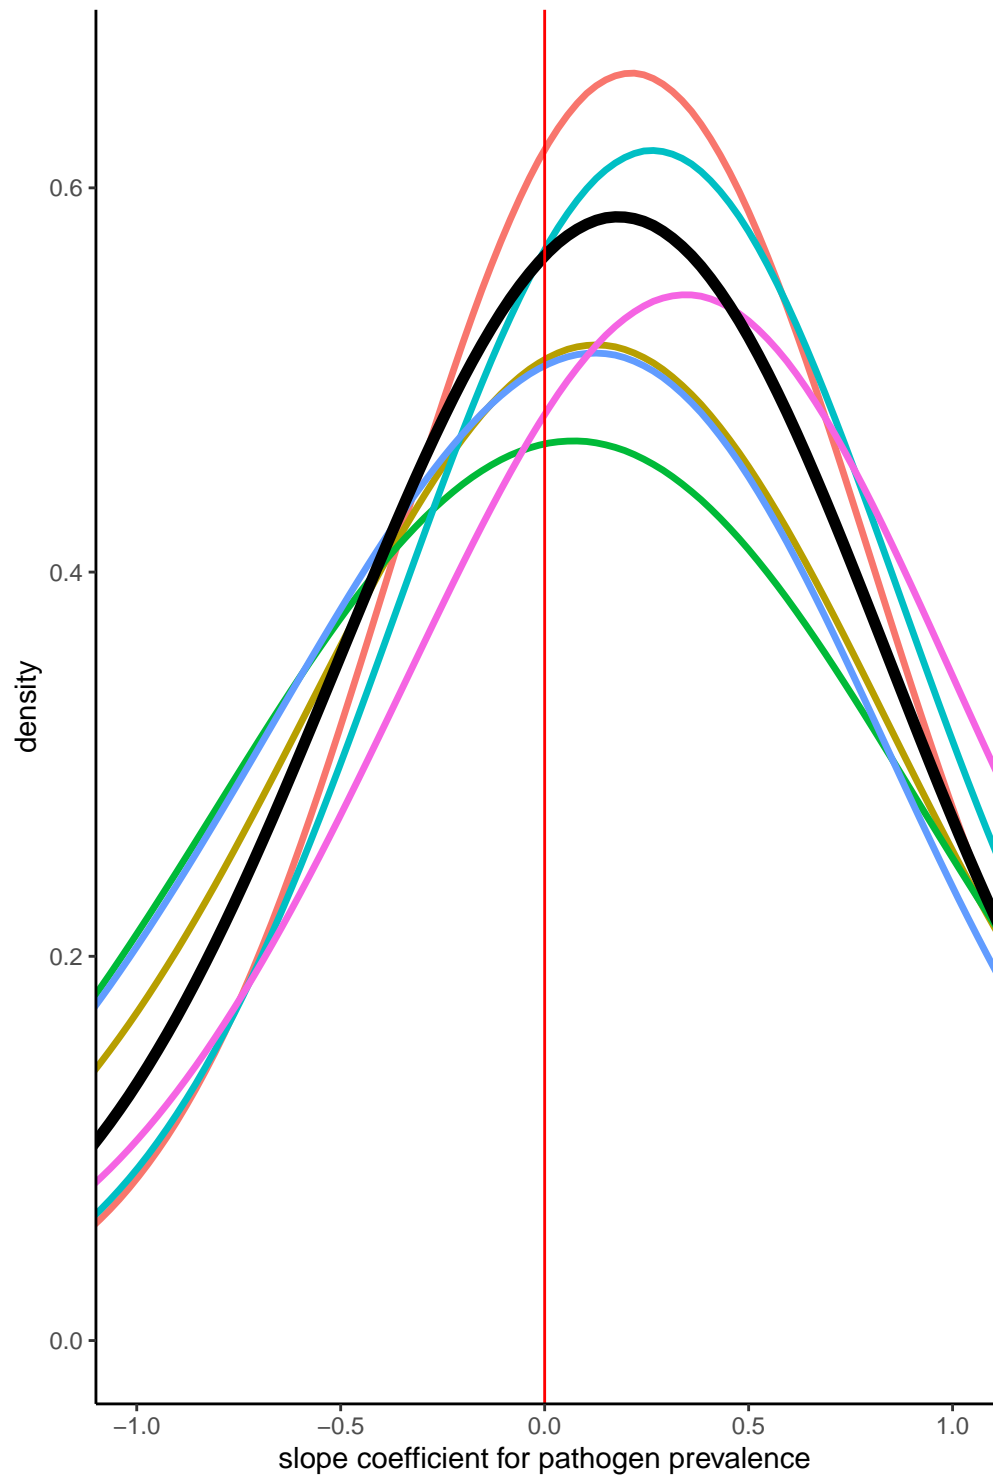



*Tetracapsuloides bryosalmonae* FaWi

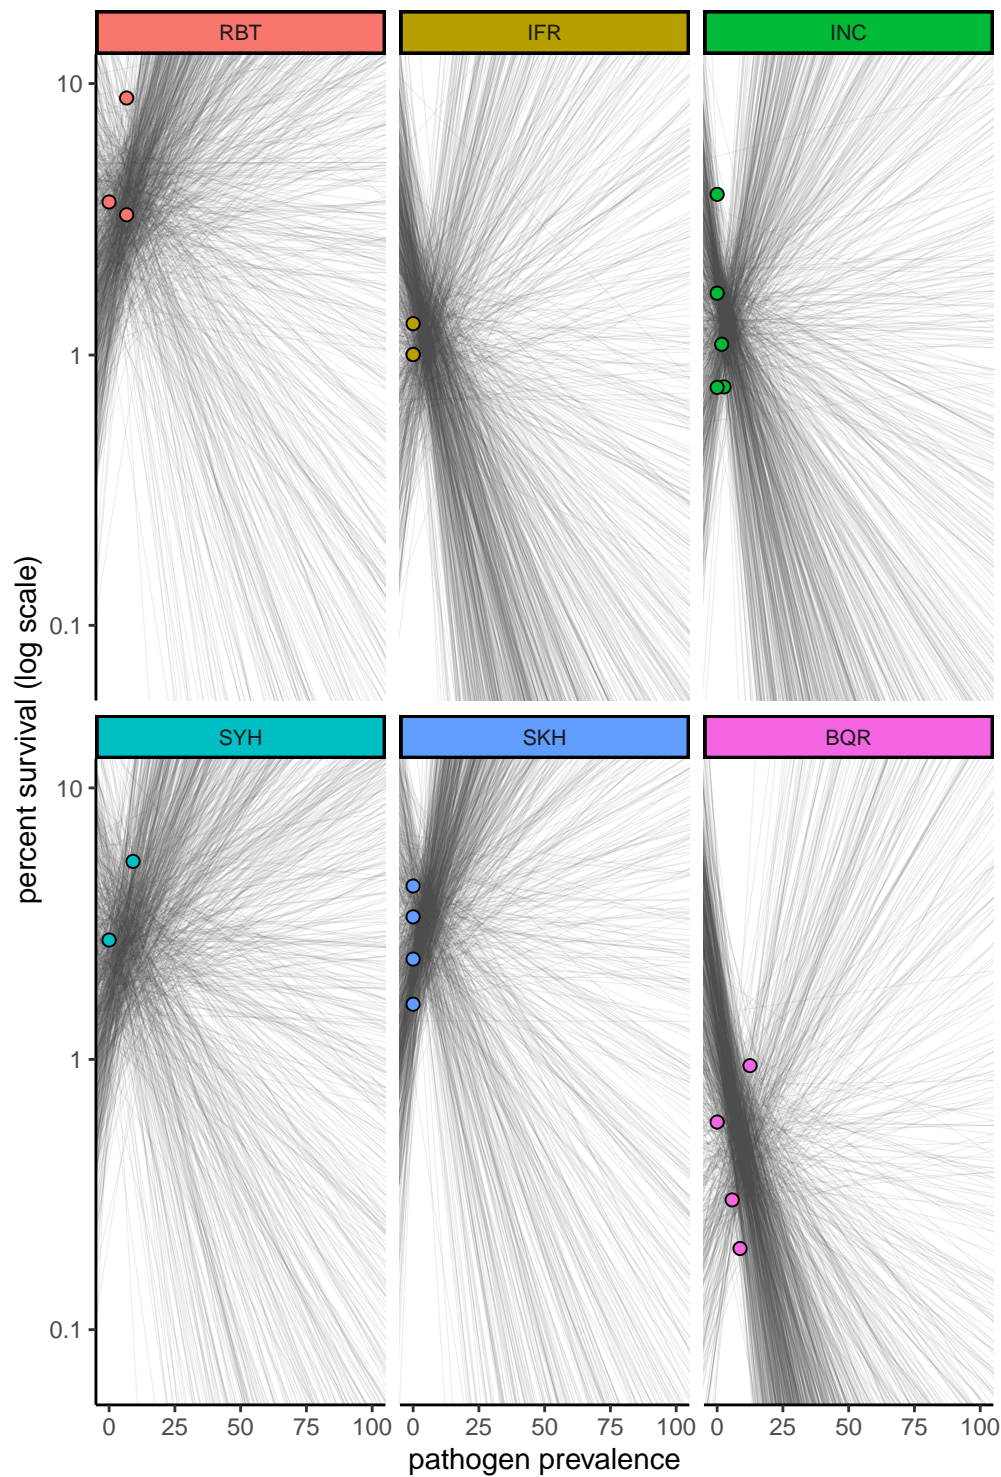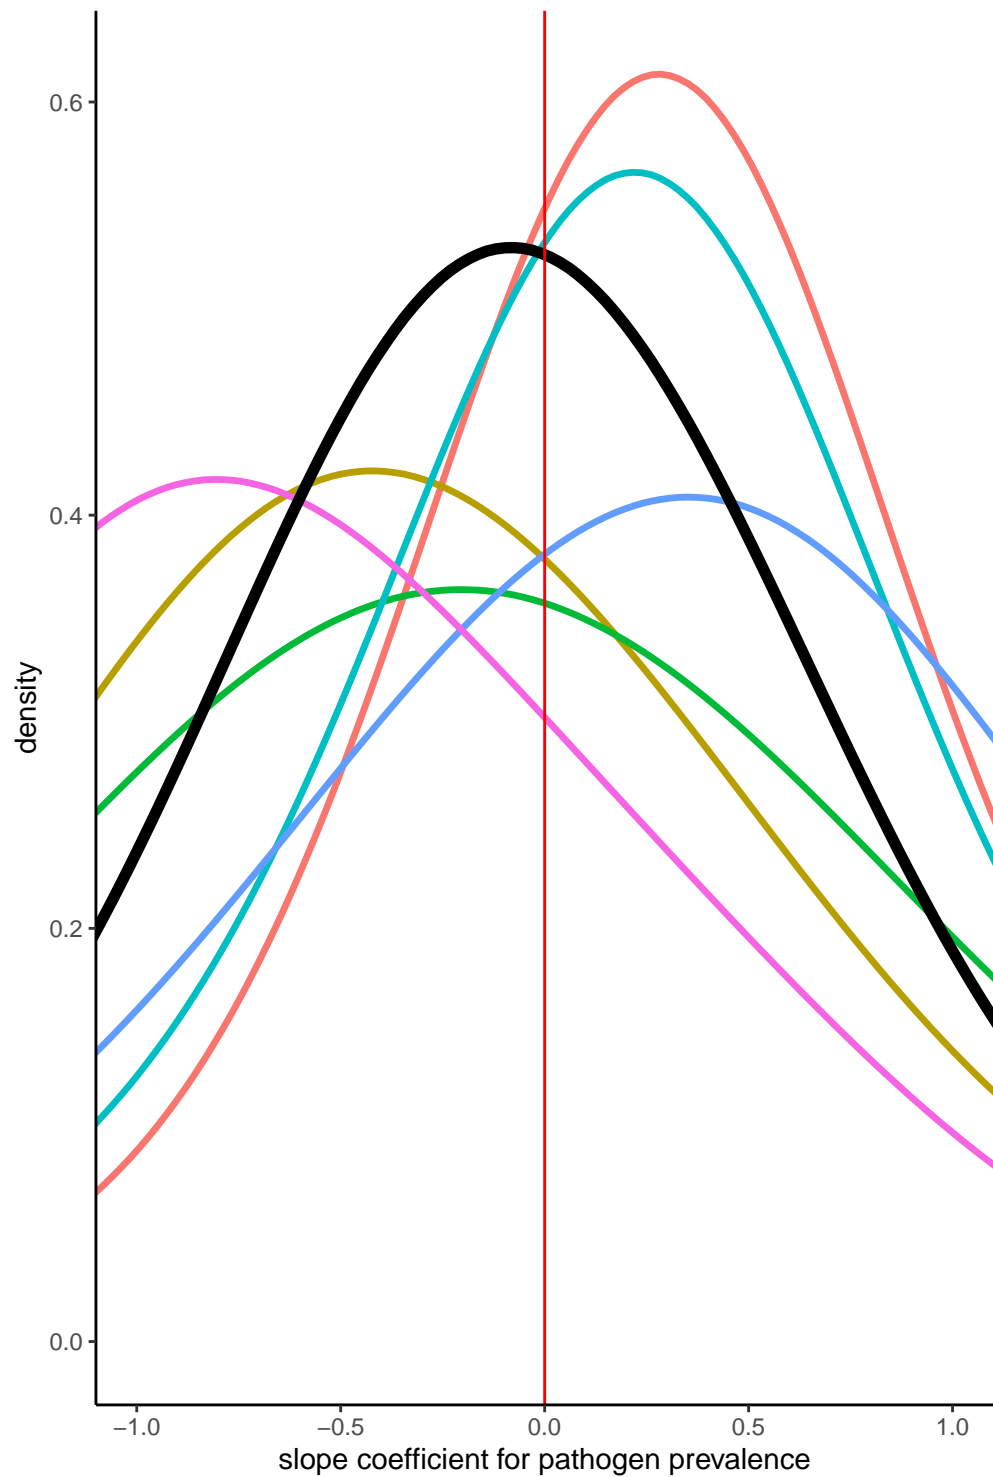

Tenacibaculum maritimum SpSu

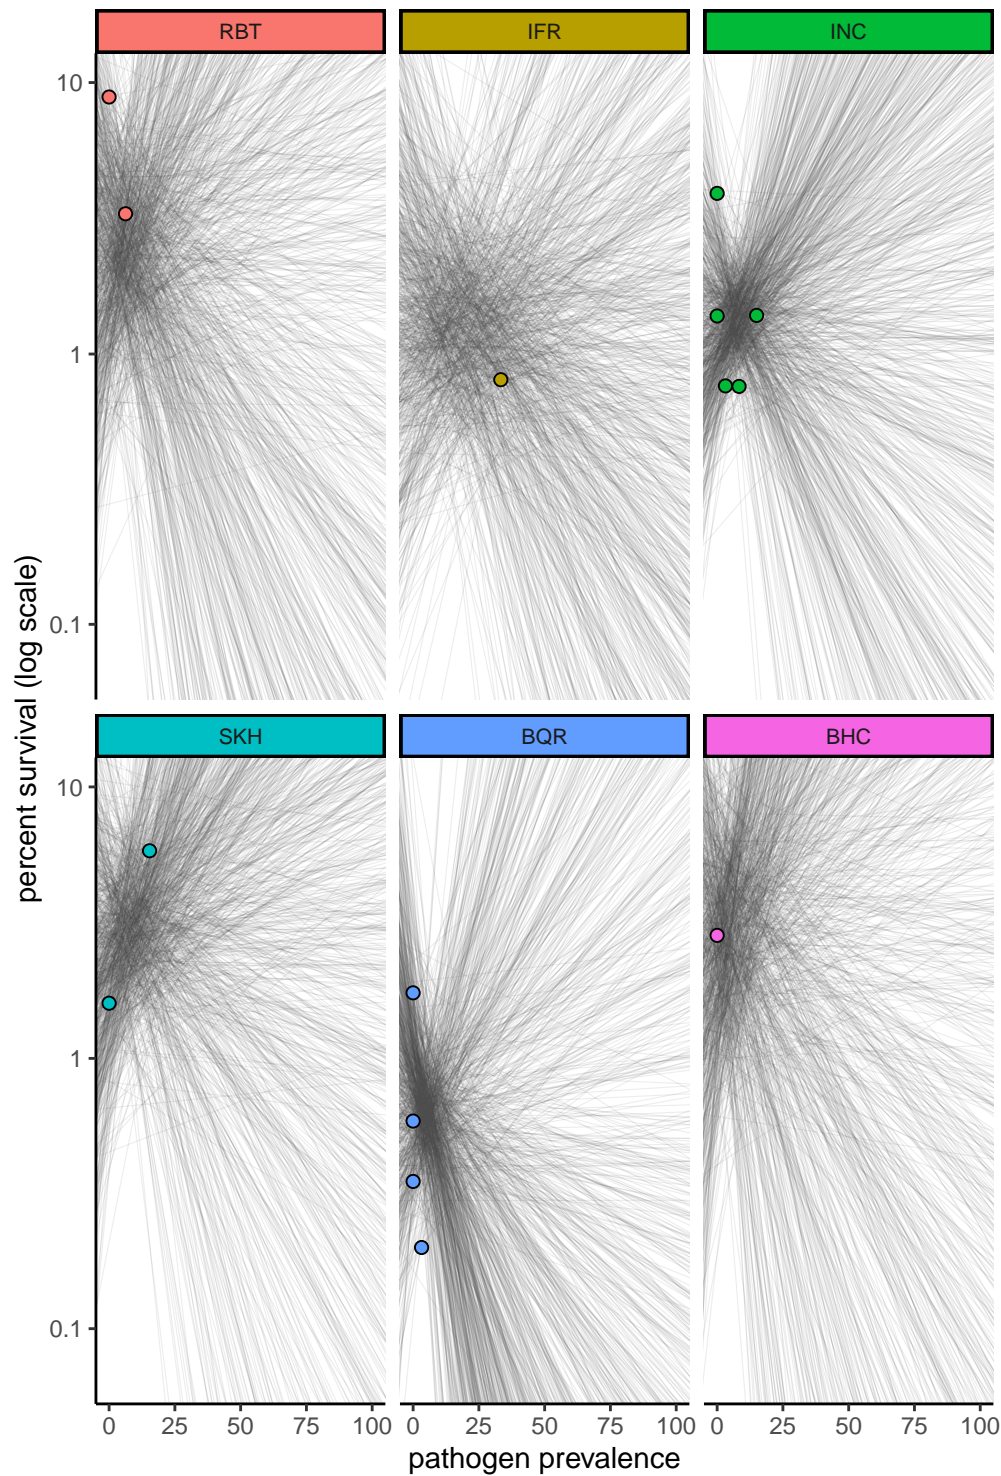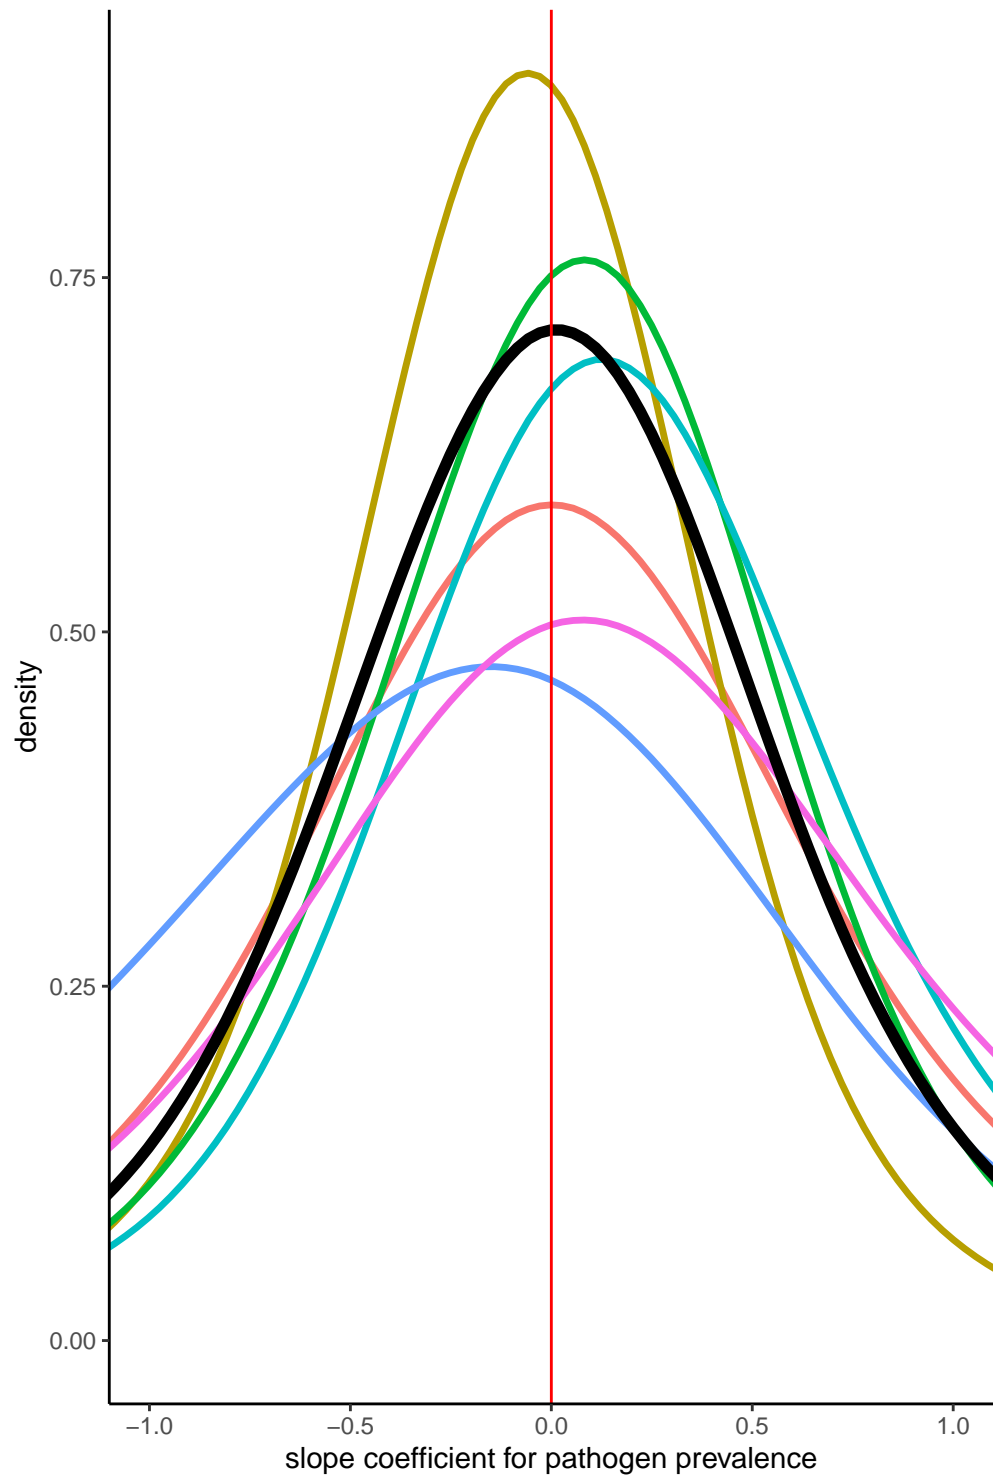



Tenacibaculum maritimum FaWi

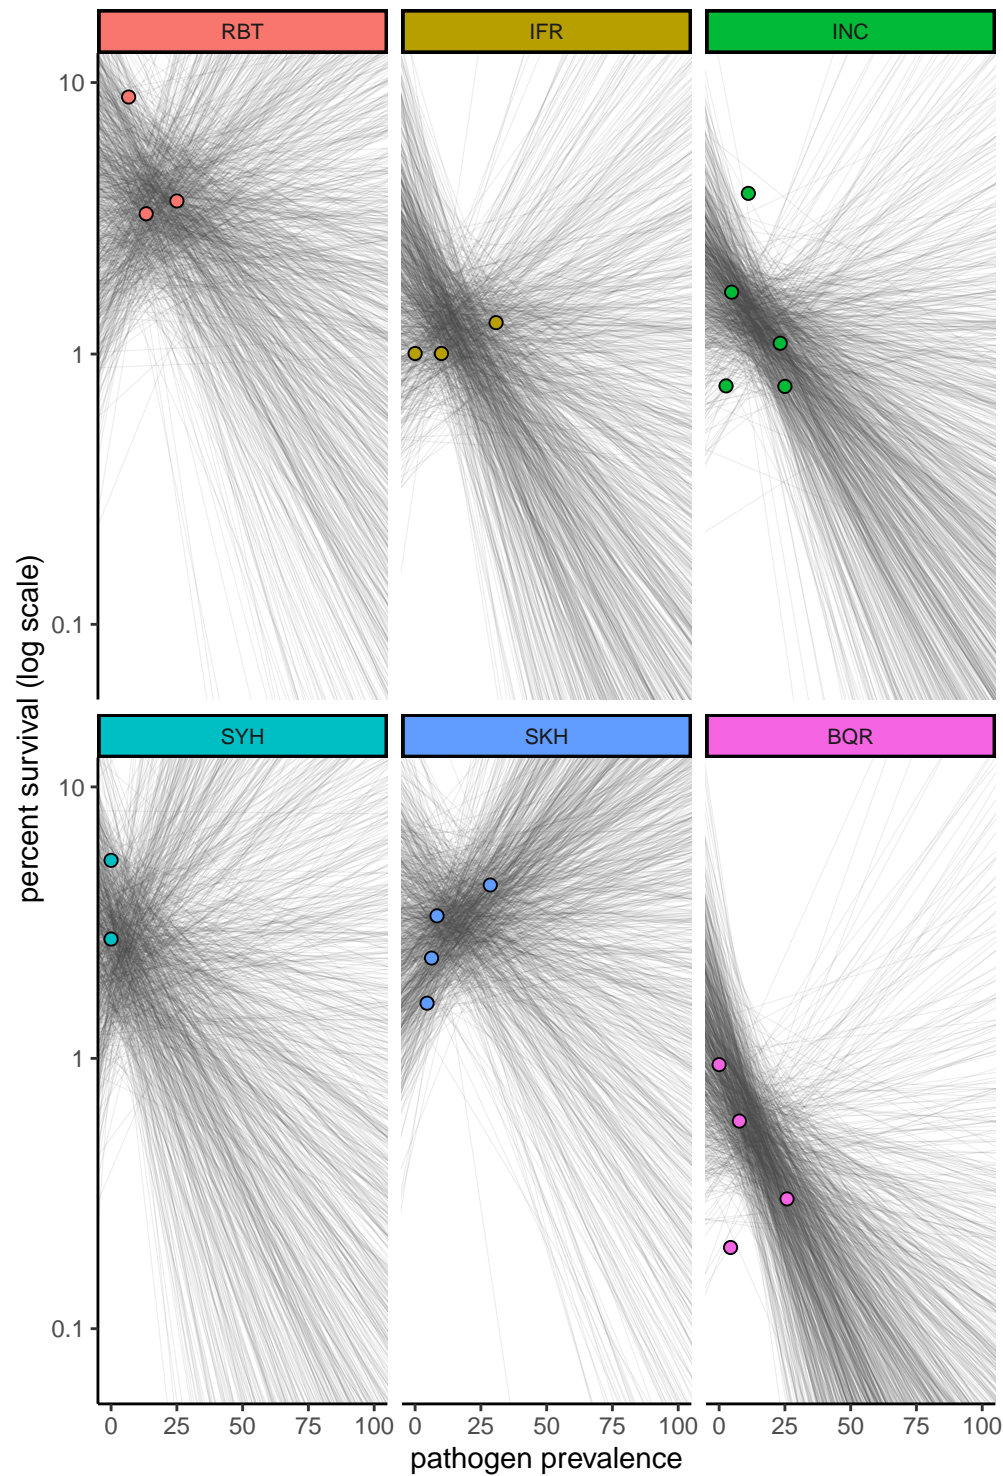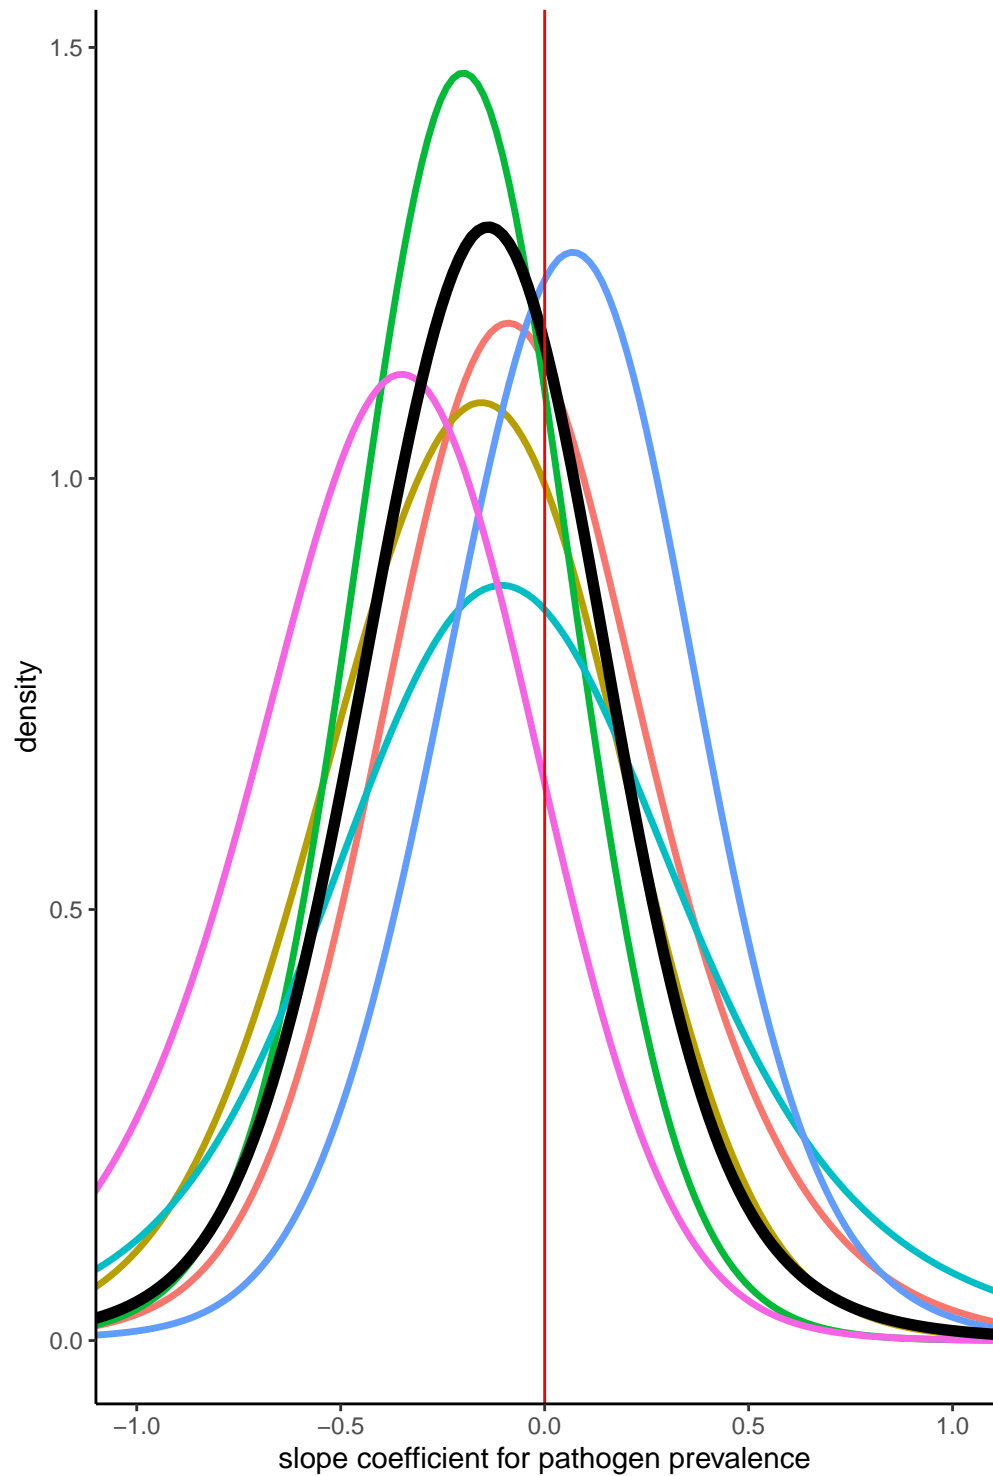

# Erythrocytic Necrosis Virus SpSu

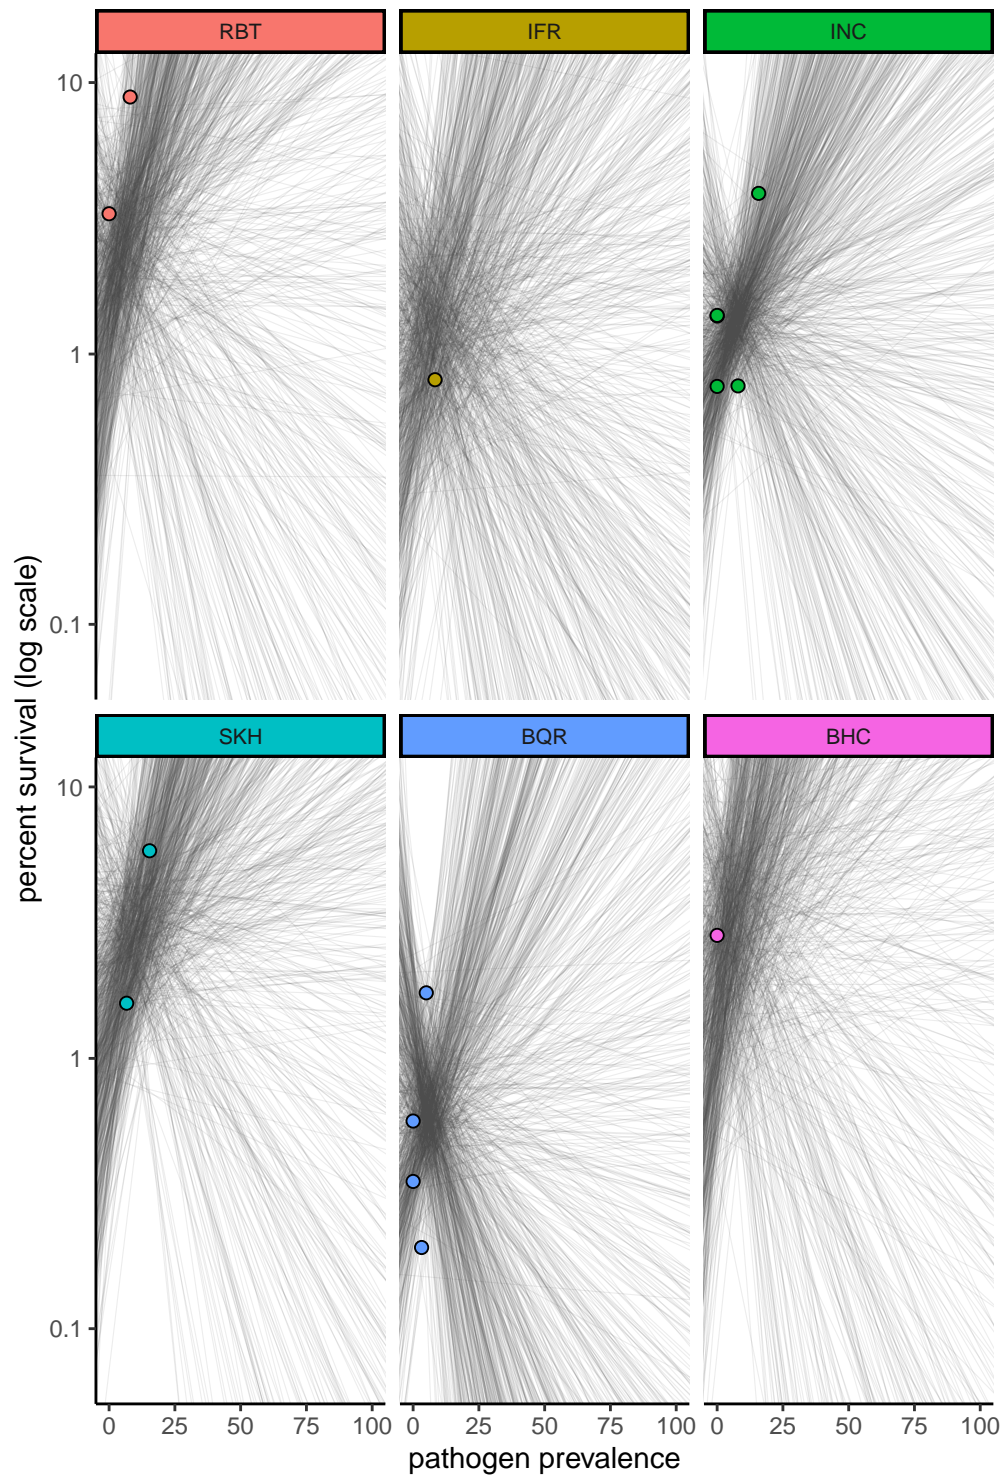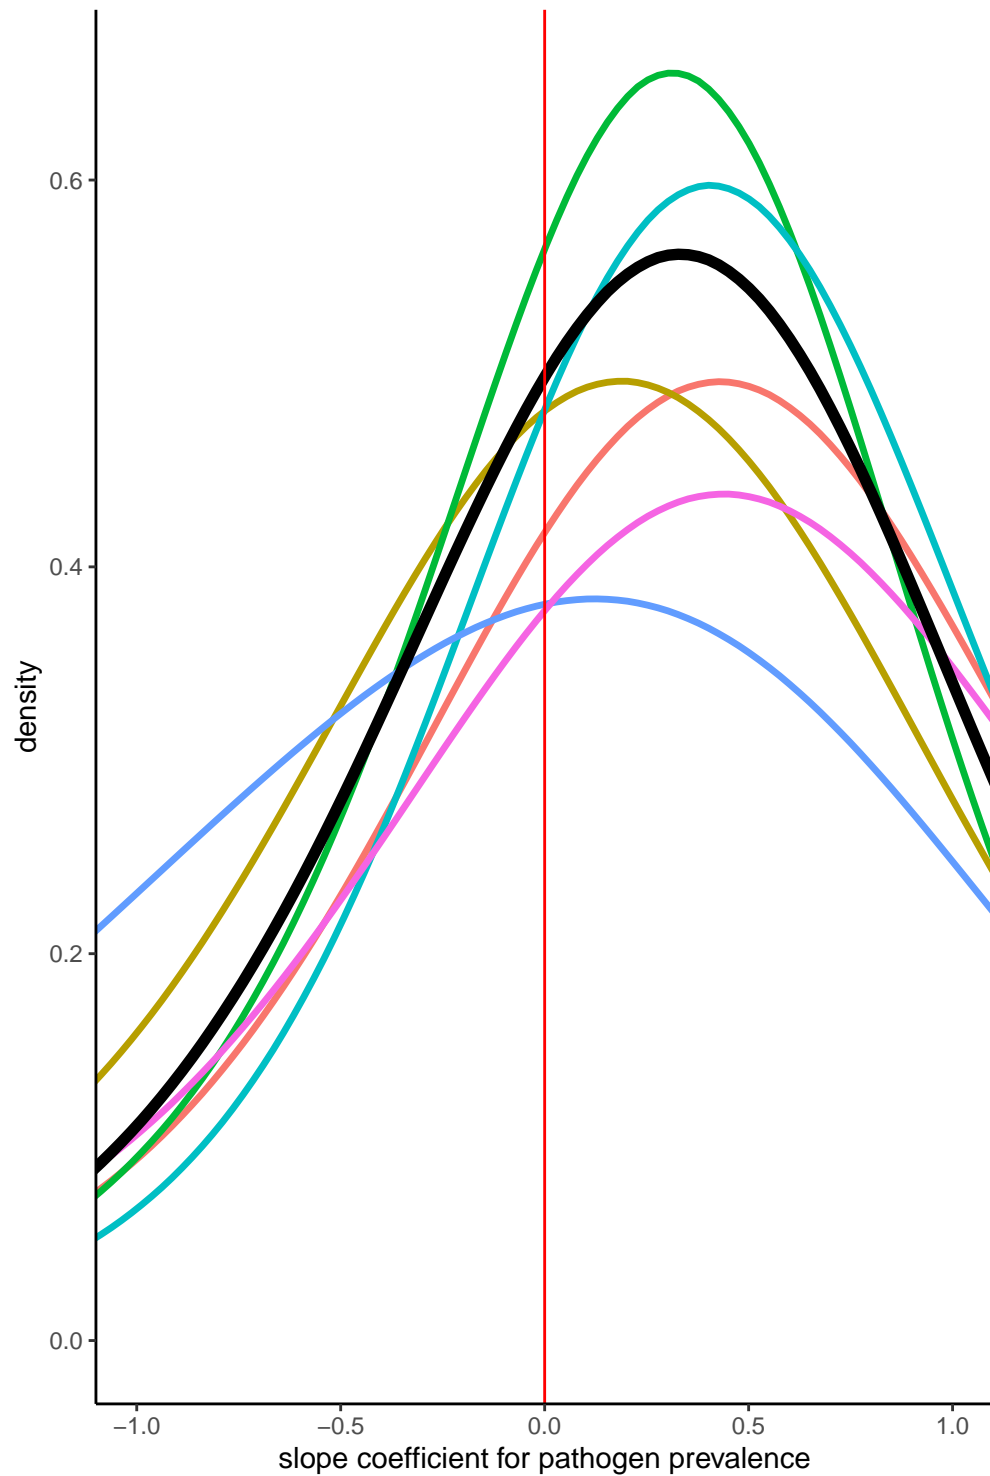



# Erythrocytic Necrosis Virus FaWi

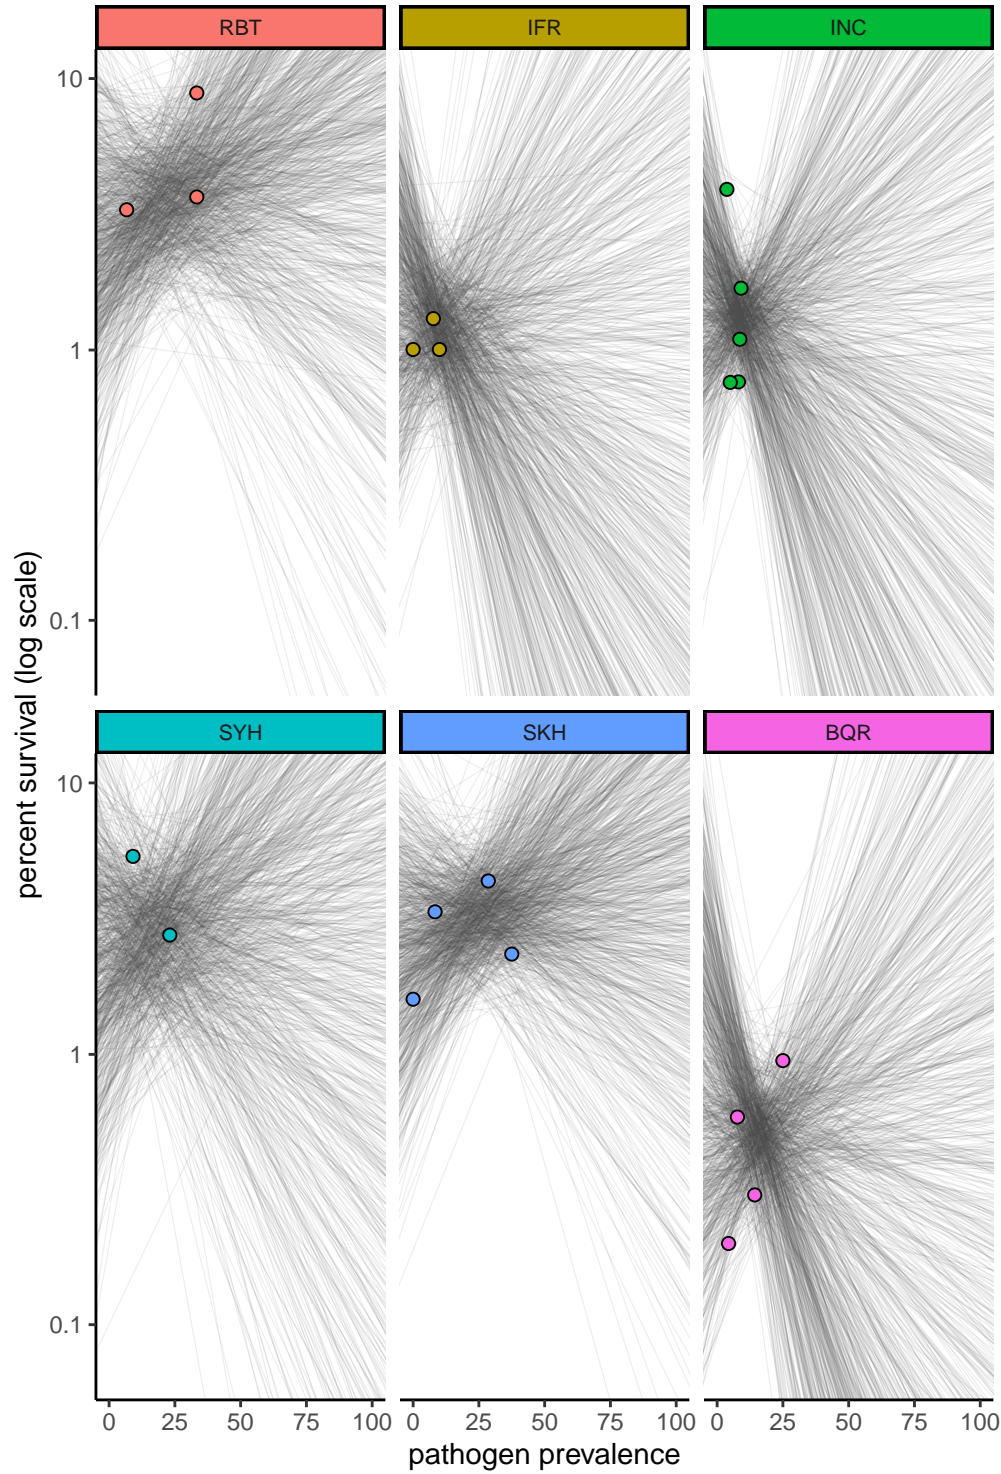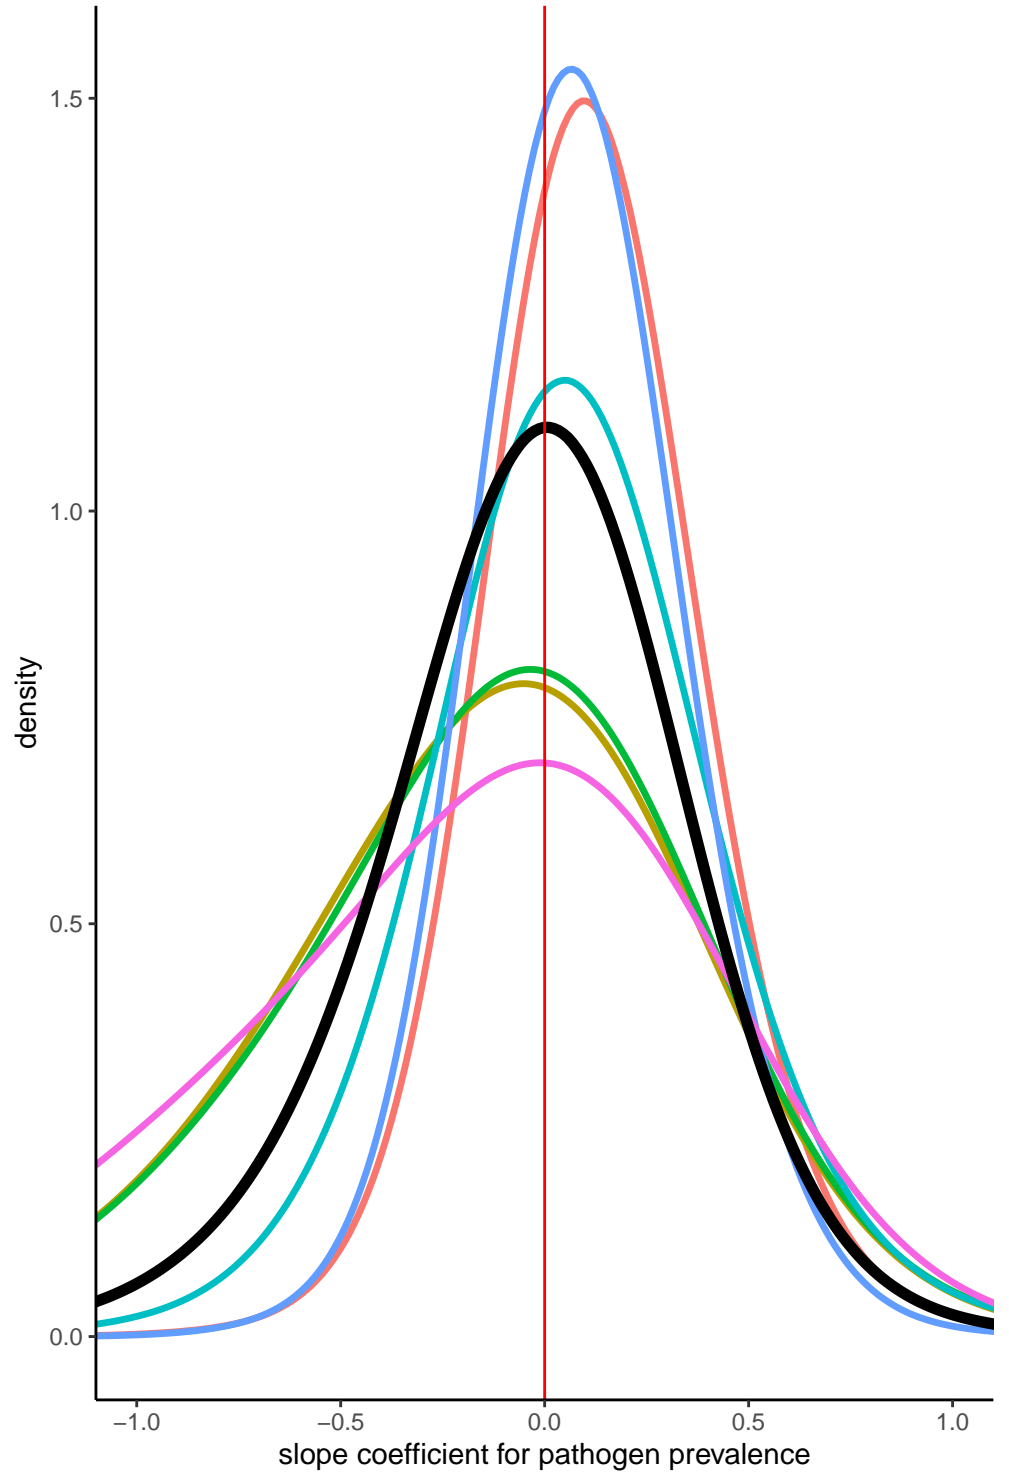

Total number of pathogen taxa SpSu

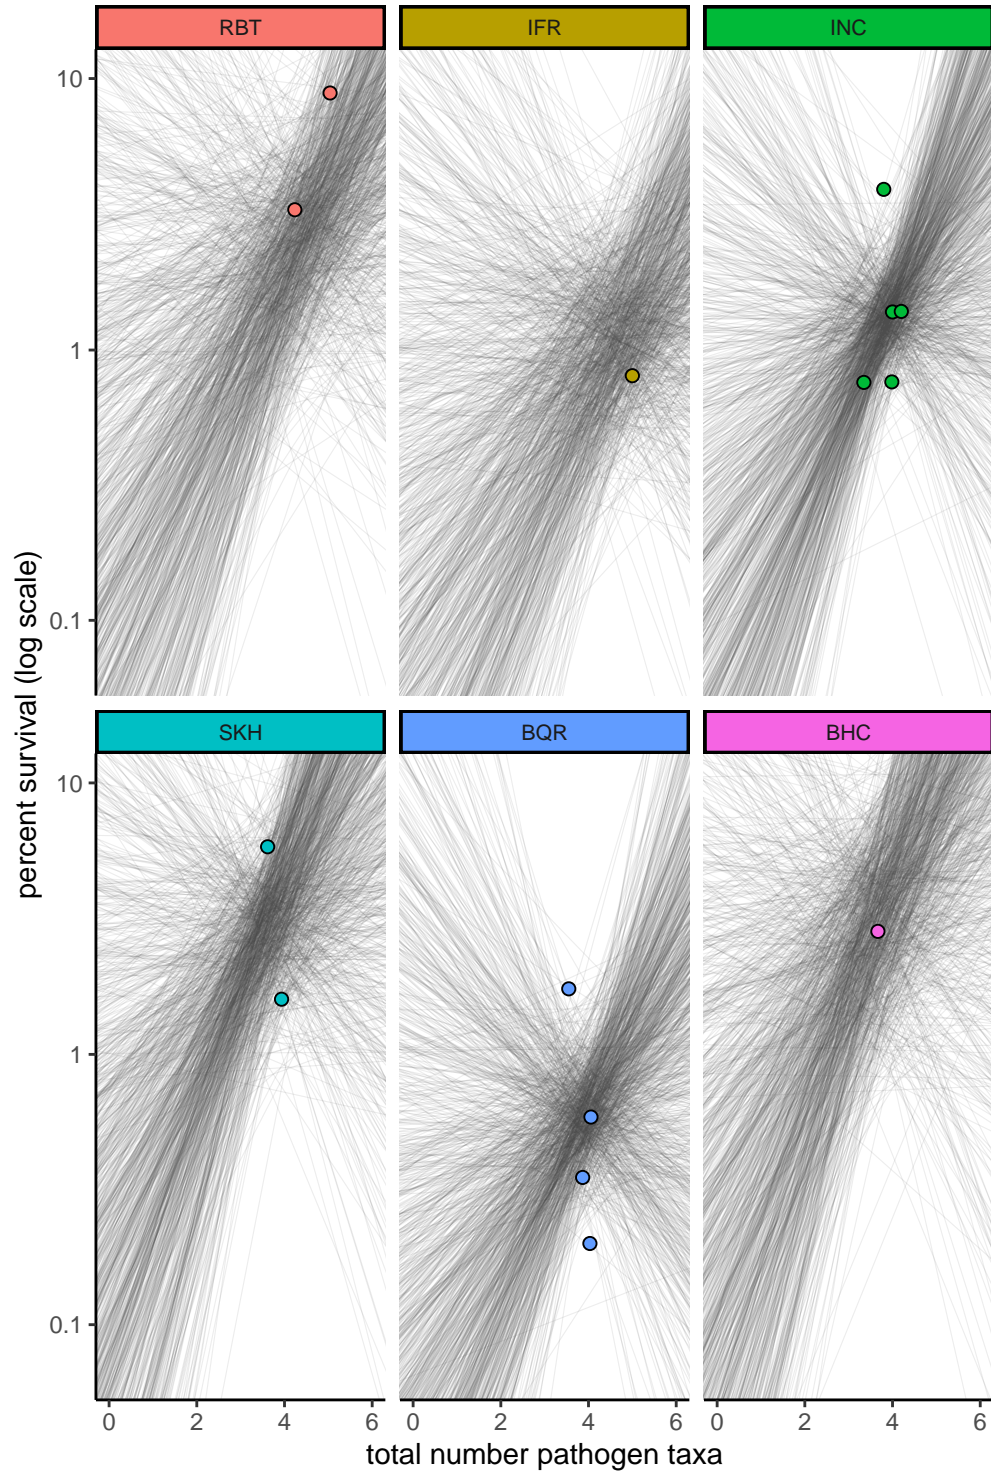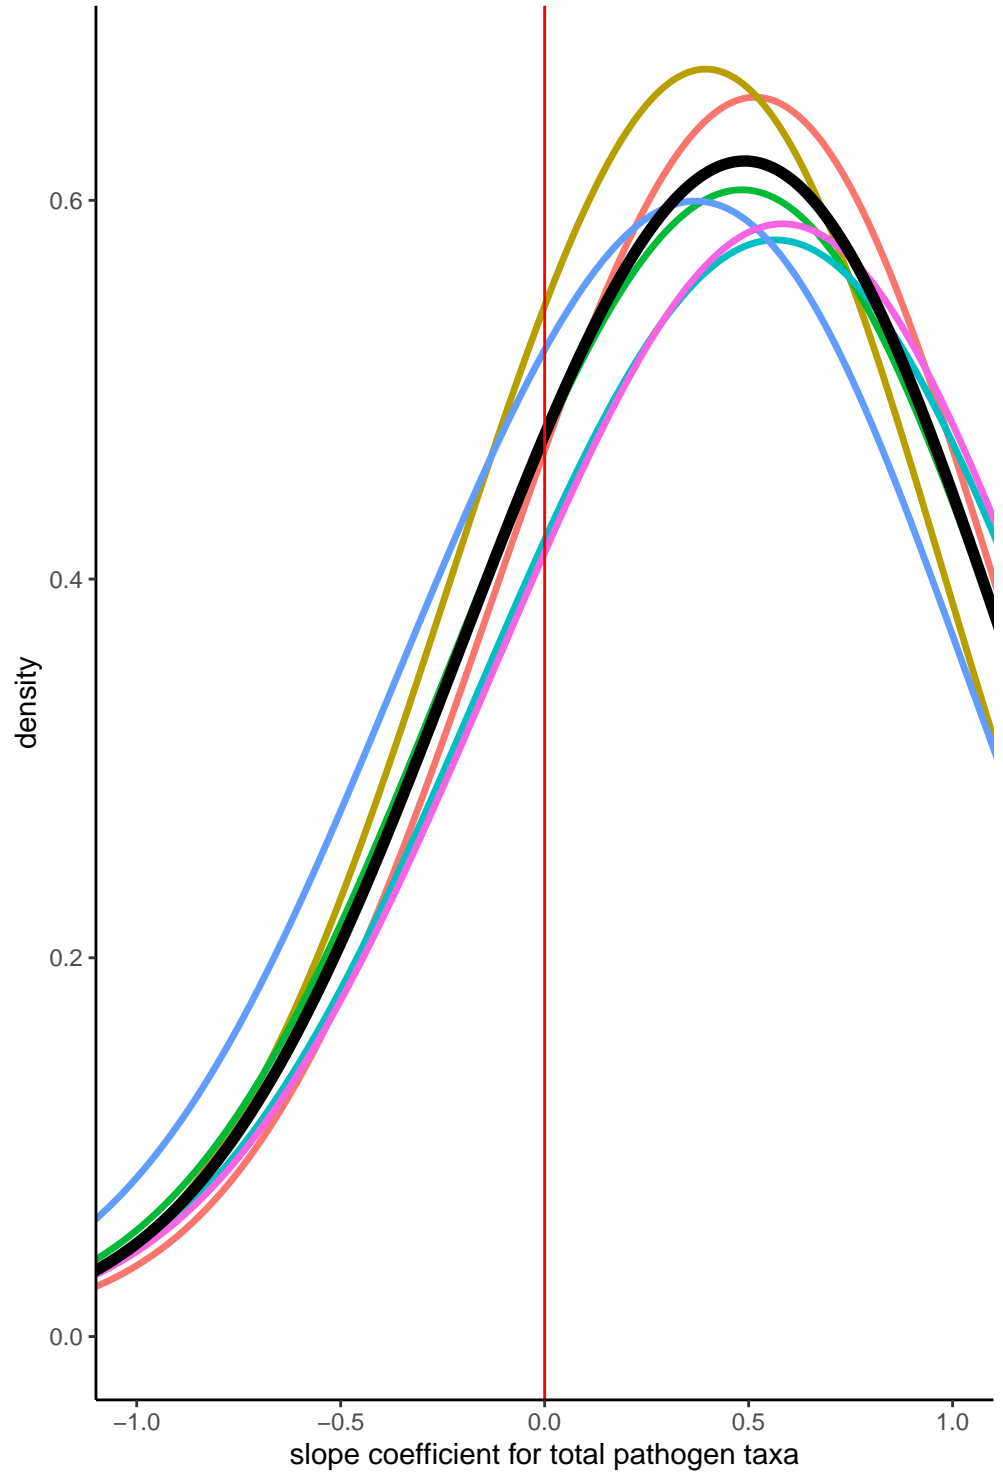



Total number of pathogen taxa FaWi

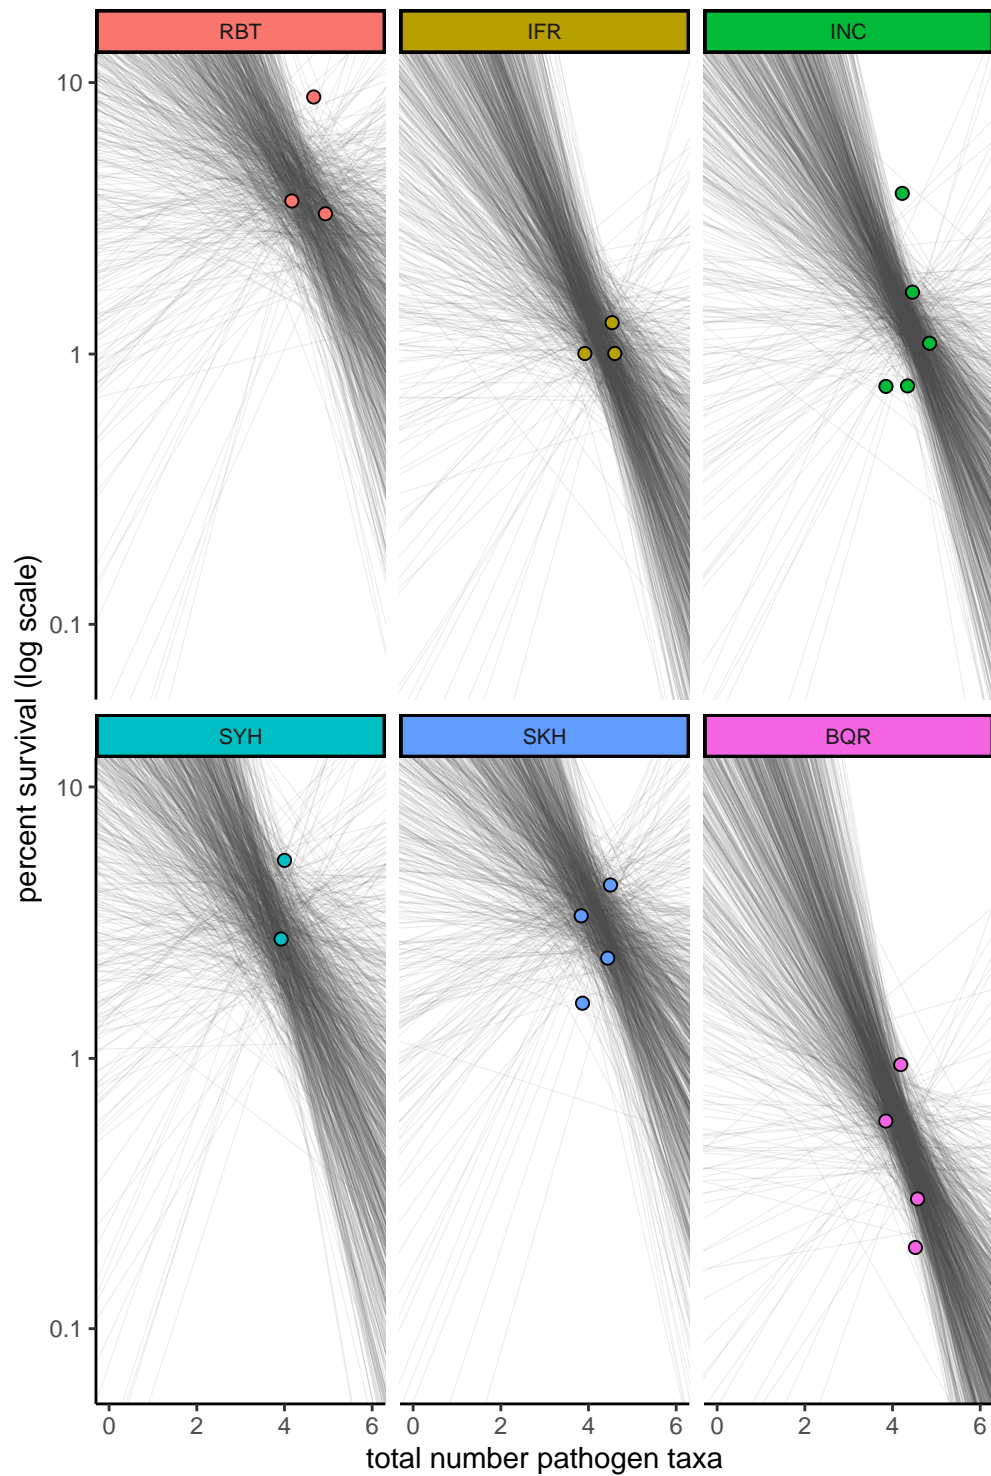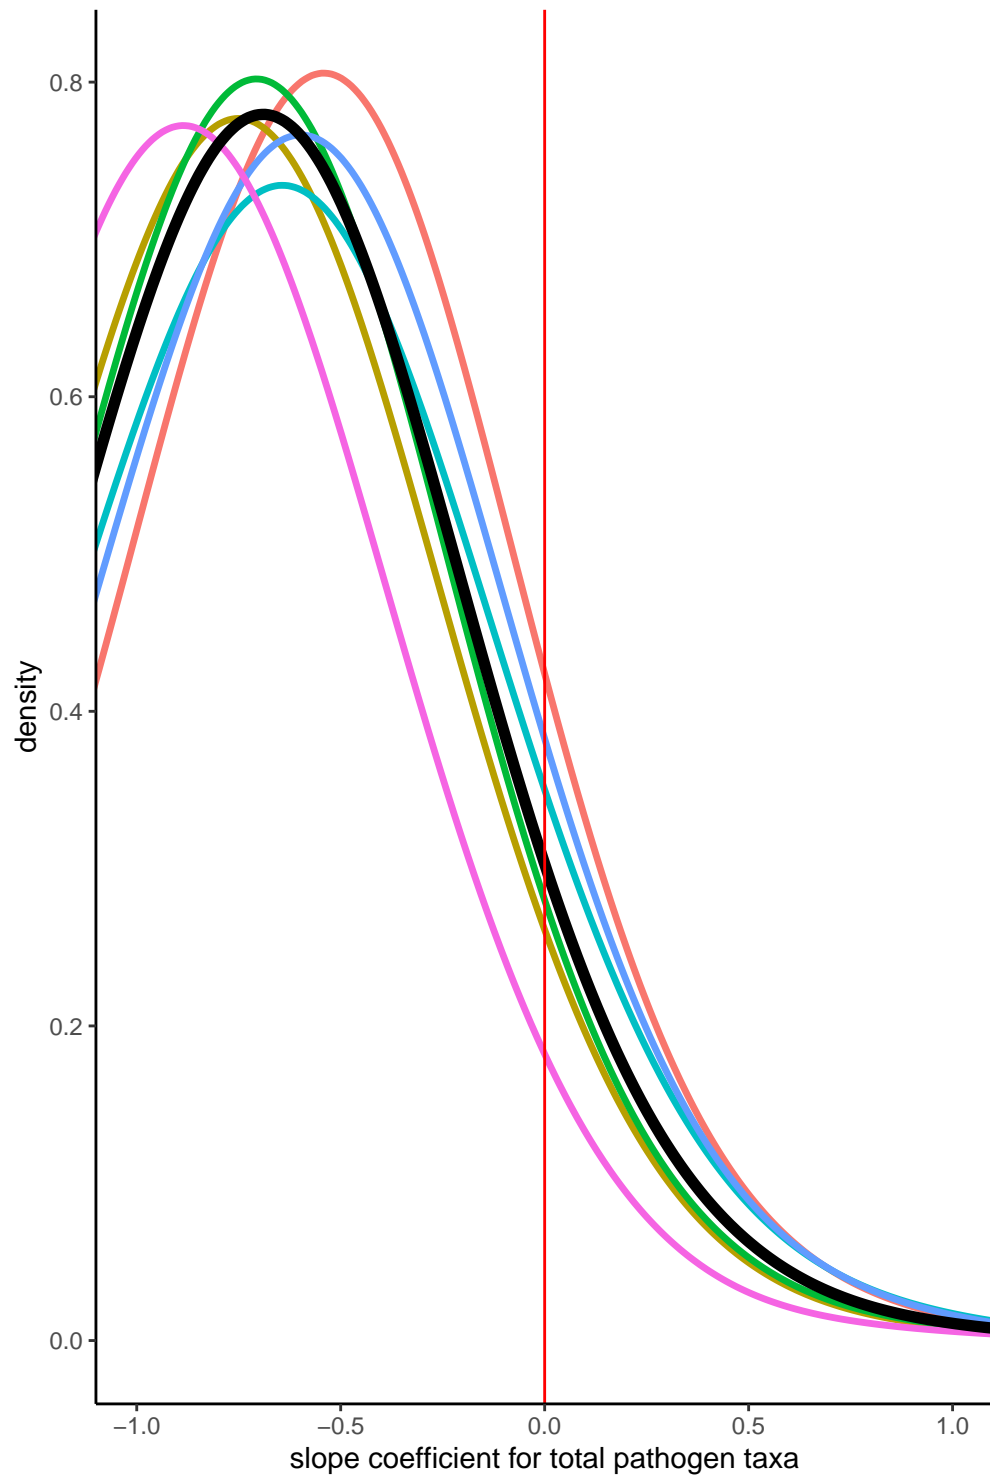

Relative infectious agent burden SpSu

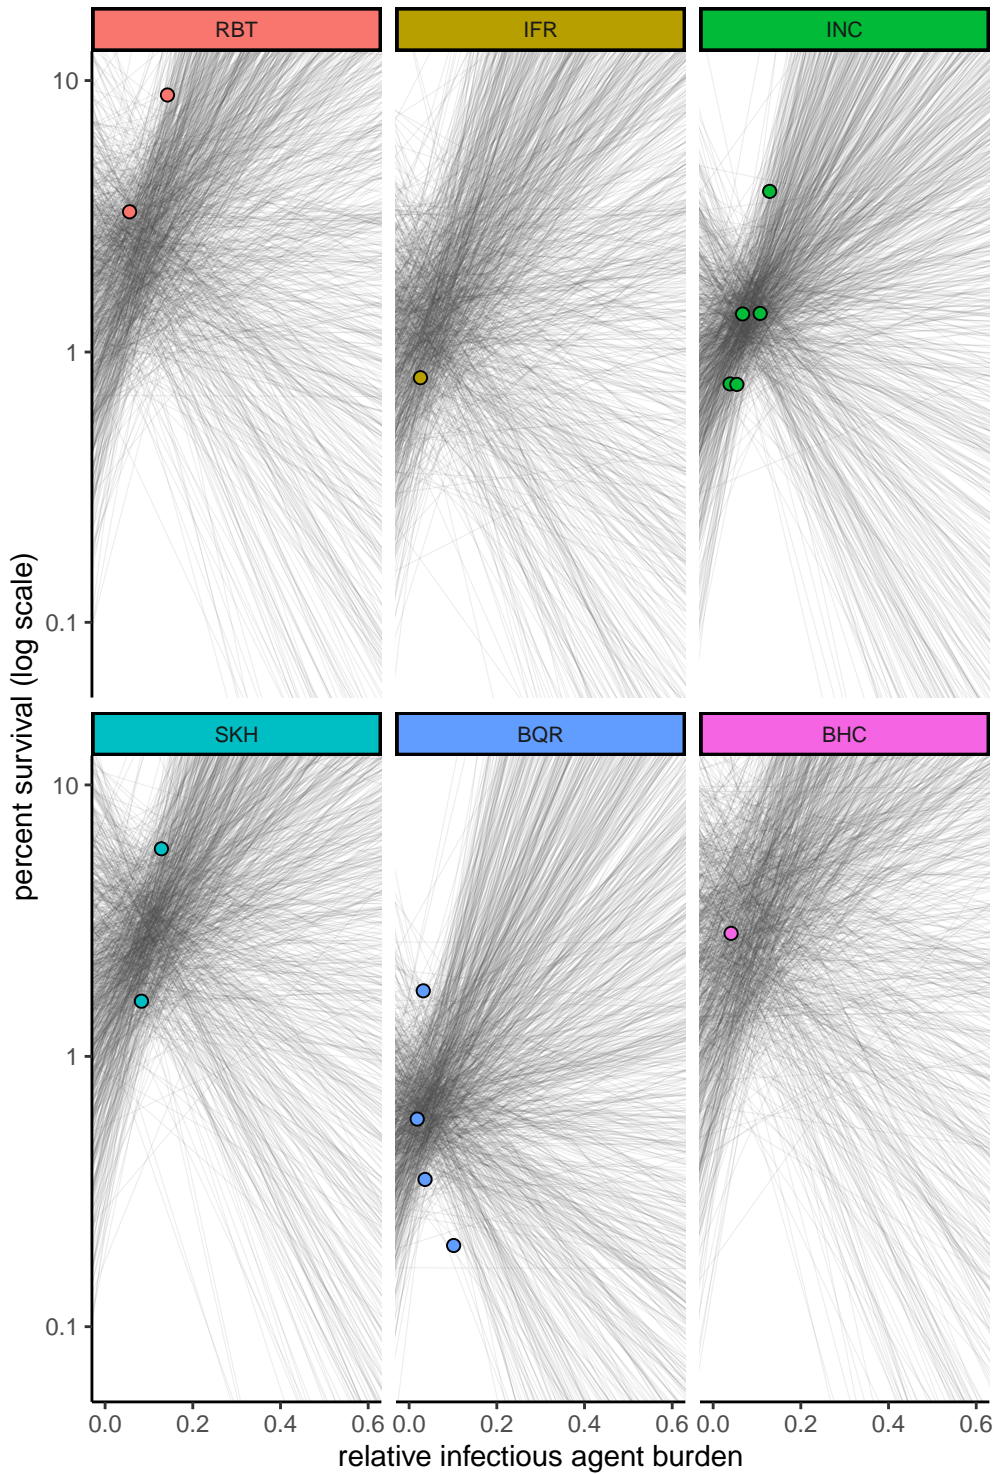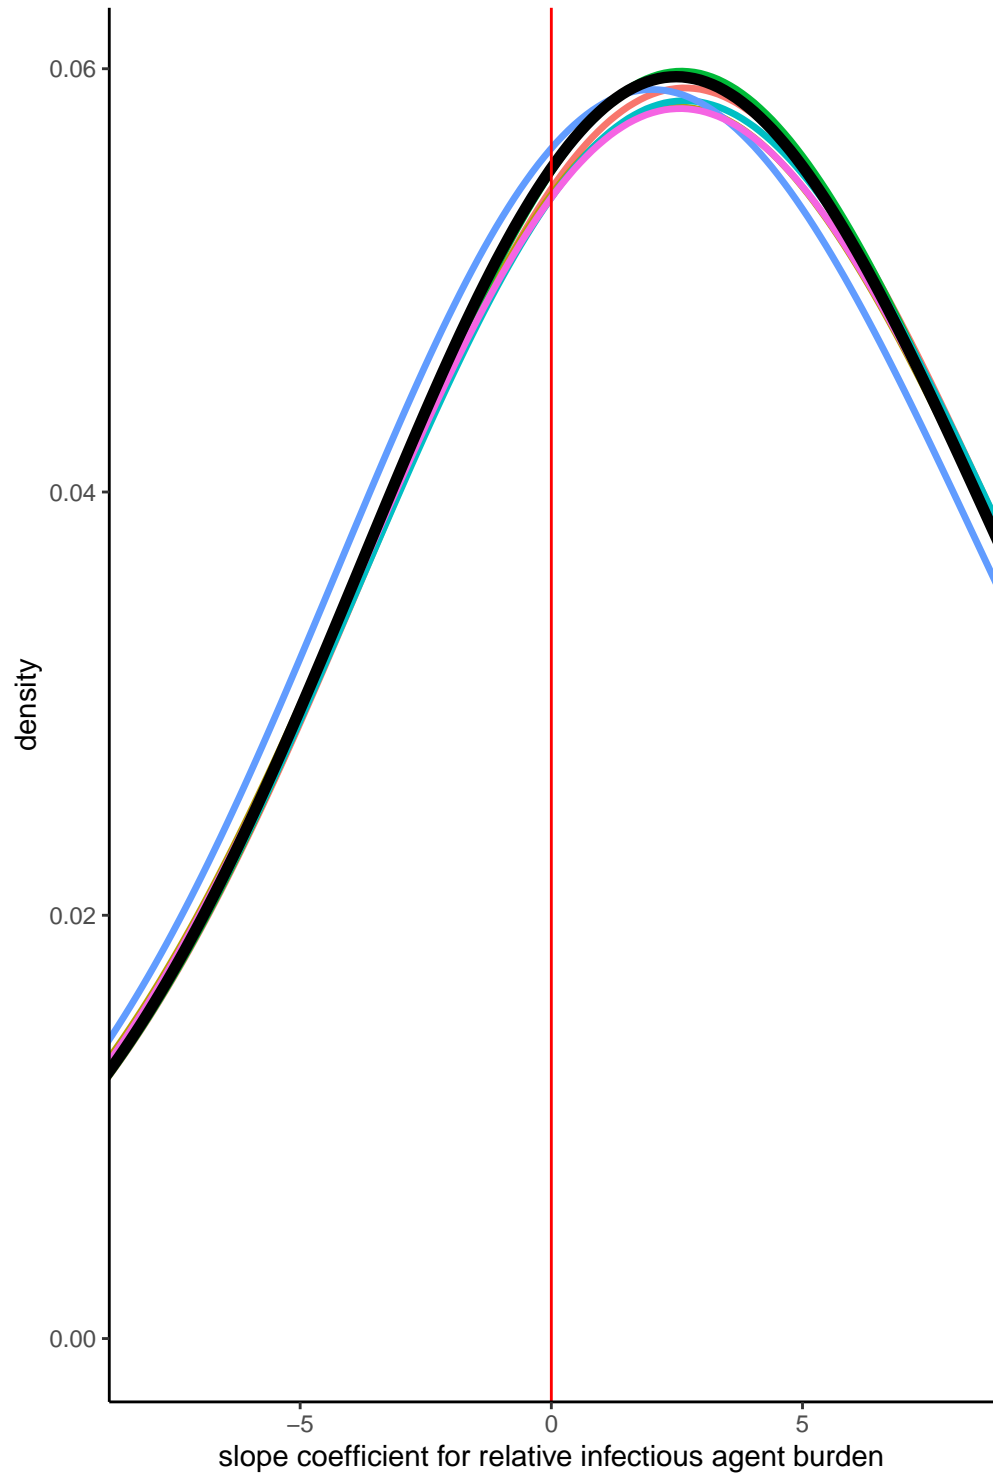



Relative infectious agent burden FaWi

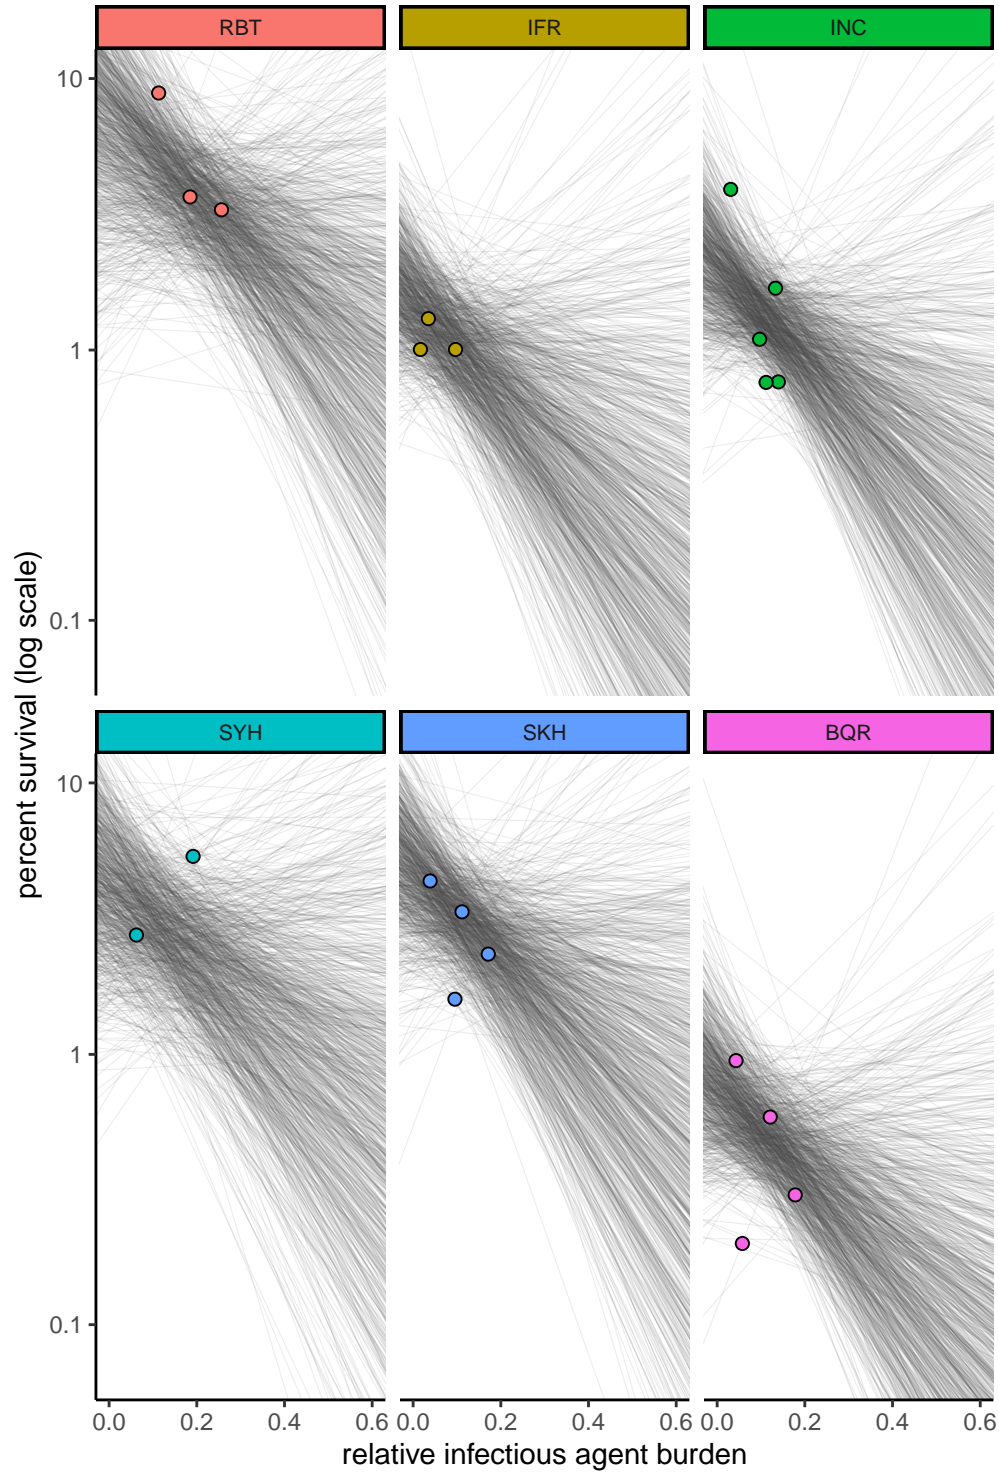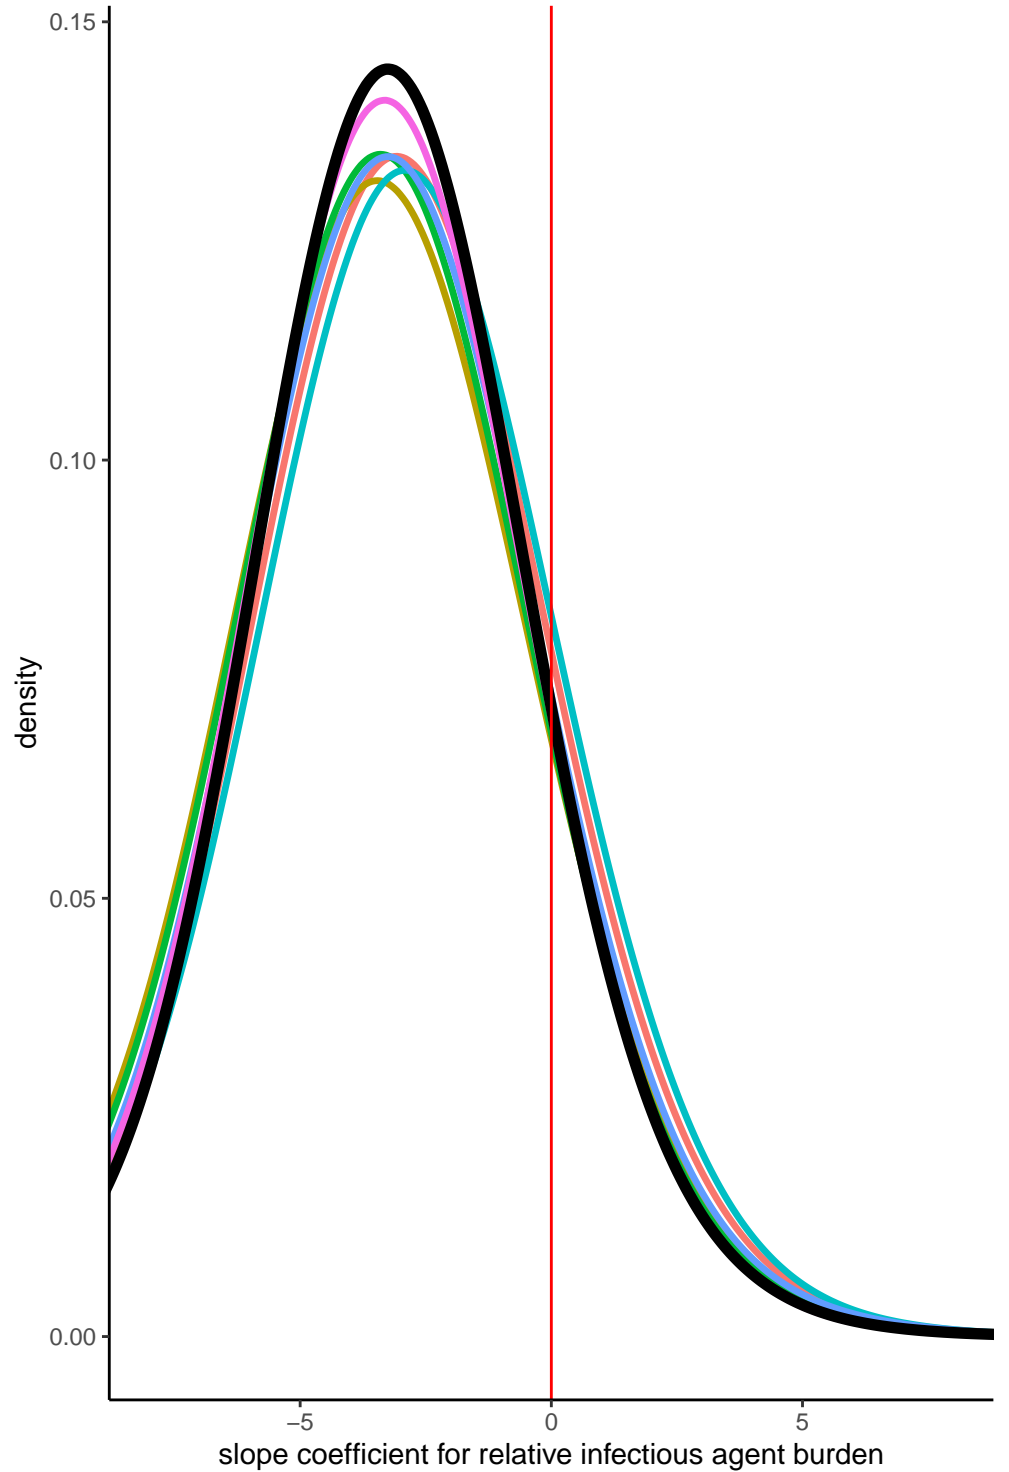

Supplement: facets-2021-0102_supplement3.pdf [file facets-2021-0102_supplement3.pdf]
