# Supplementary material for: Identification of infectious agents in early marine Chinook and Coho salmon associated with cohort survival
Source: Atypon-hosted journal article supplement (doi:10.1139/facets-2021-0102), 2022-01-01

## **Supplementary Material 4: Chinook mass deviation model figures**

### **"Identification of infectious agents in early marine Chinook and Coho salmon associated with cohort survival"**

Arthur L. Bass, Andrew W. Bateman, Brendan M. Connors, Benjamin A. Staton, Eric B. Rondeau, Gideon J. Mordecai, Amy K. Teffer, Karia H. Kaukinen, Shaorong Li, Amy M. Tabata, David A. Patterson, Scott G. Hinch, Kristina M. Miller

**Description:** Bayesian multi-level model results from Chinook mass deviation models. Raw data (points) are presented in left panels and model results are presented in right panels (heavy black line indicates the posterior distribution of the hyperdistribution mean). Lines in left panels represent 1000 random draws from the posterior distributions of the stock-specific intercepts and slopes. Slope coefficient for the right panel is relative to a 2 SD increase in pathogen load.

# Salmon Pescarenavirus 1 SpSu

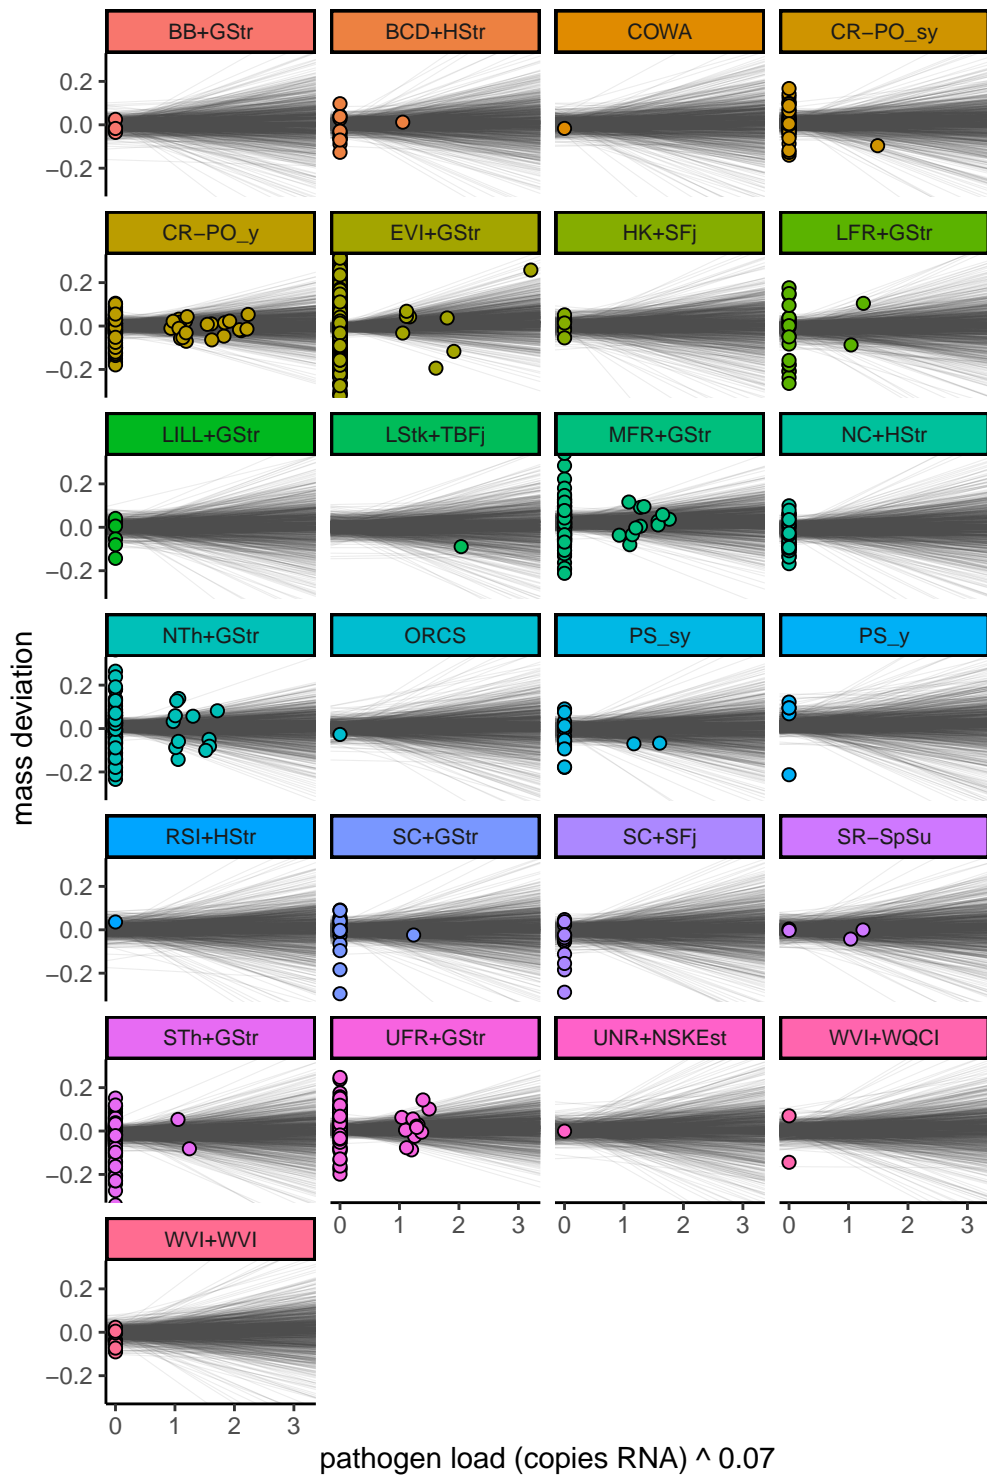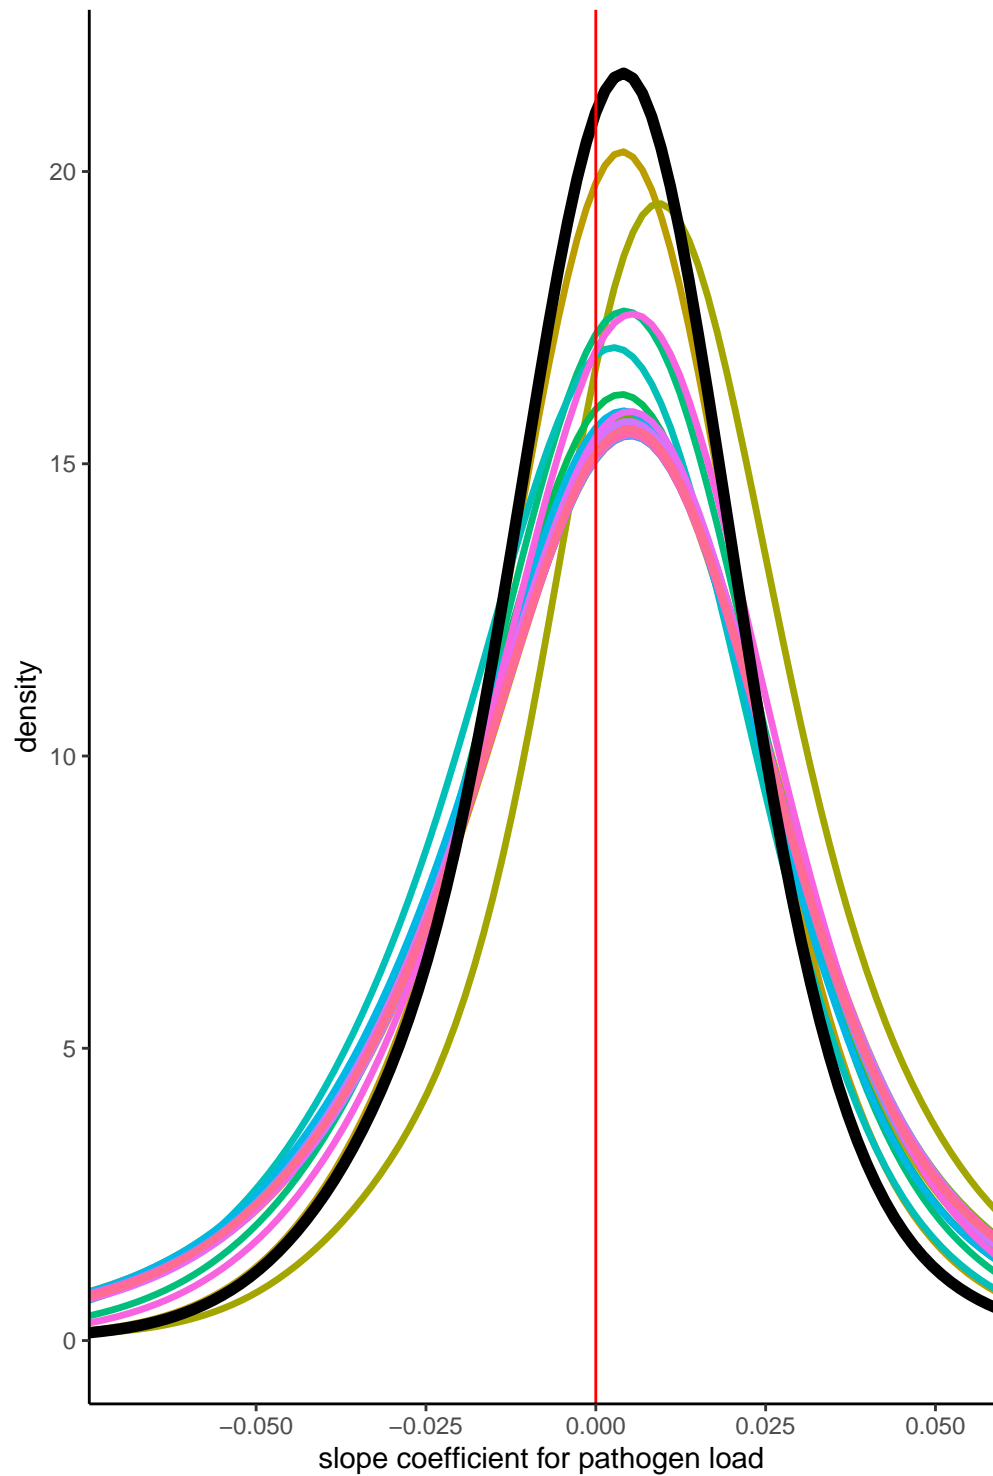

Salmon Pescarenavirus 1 FaWi

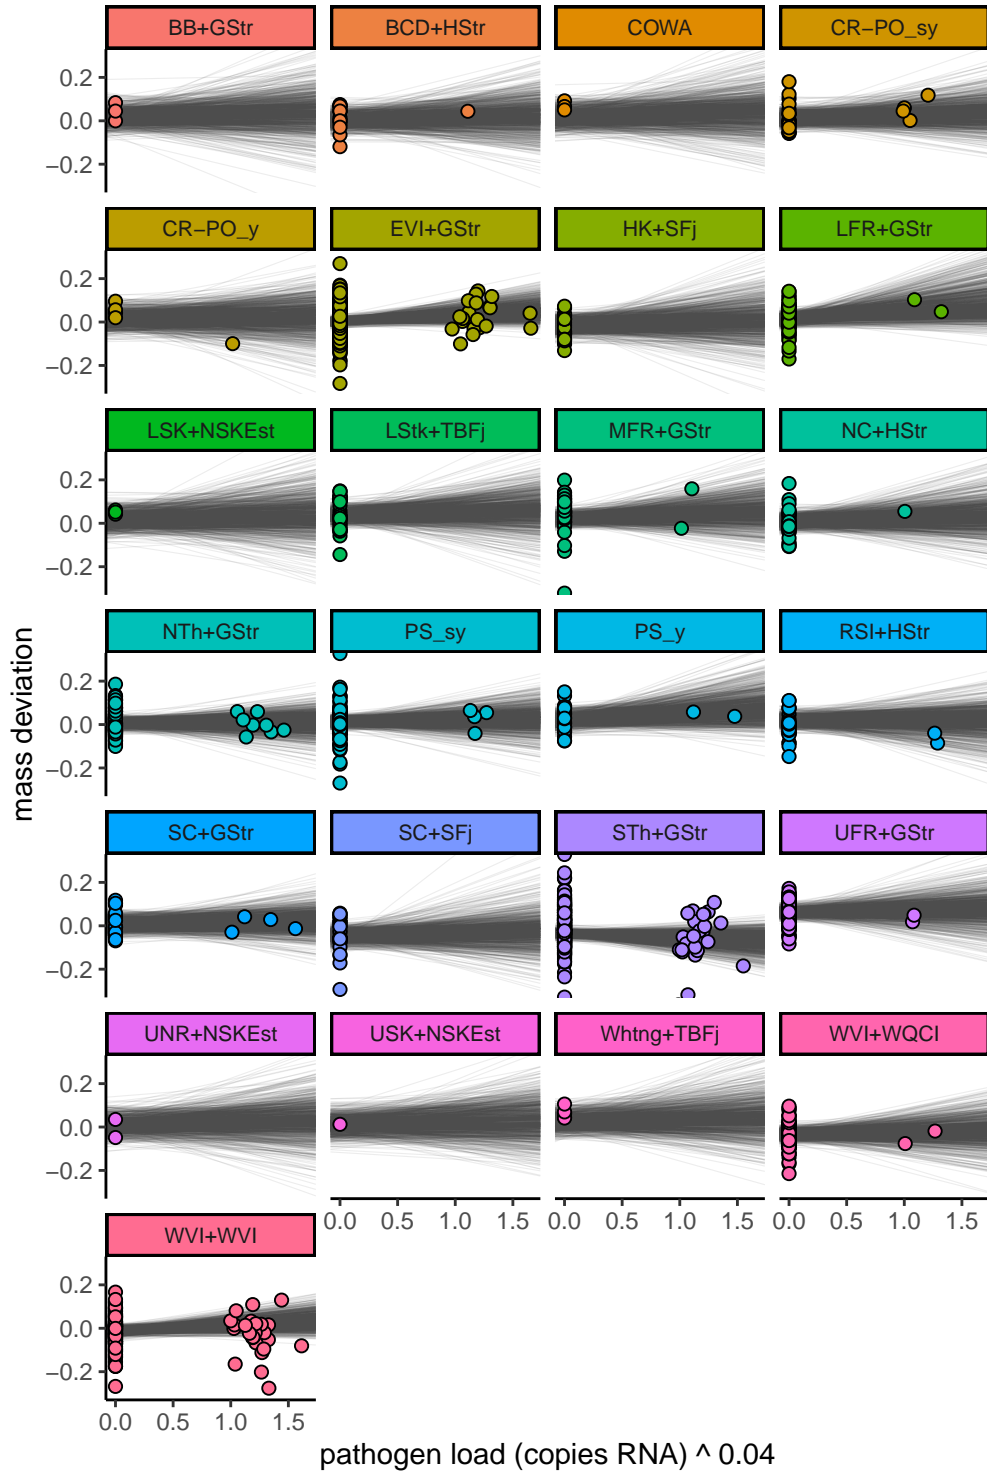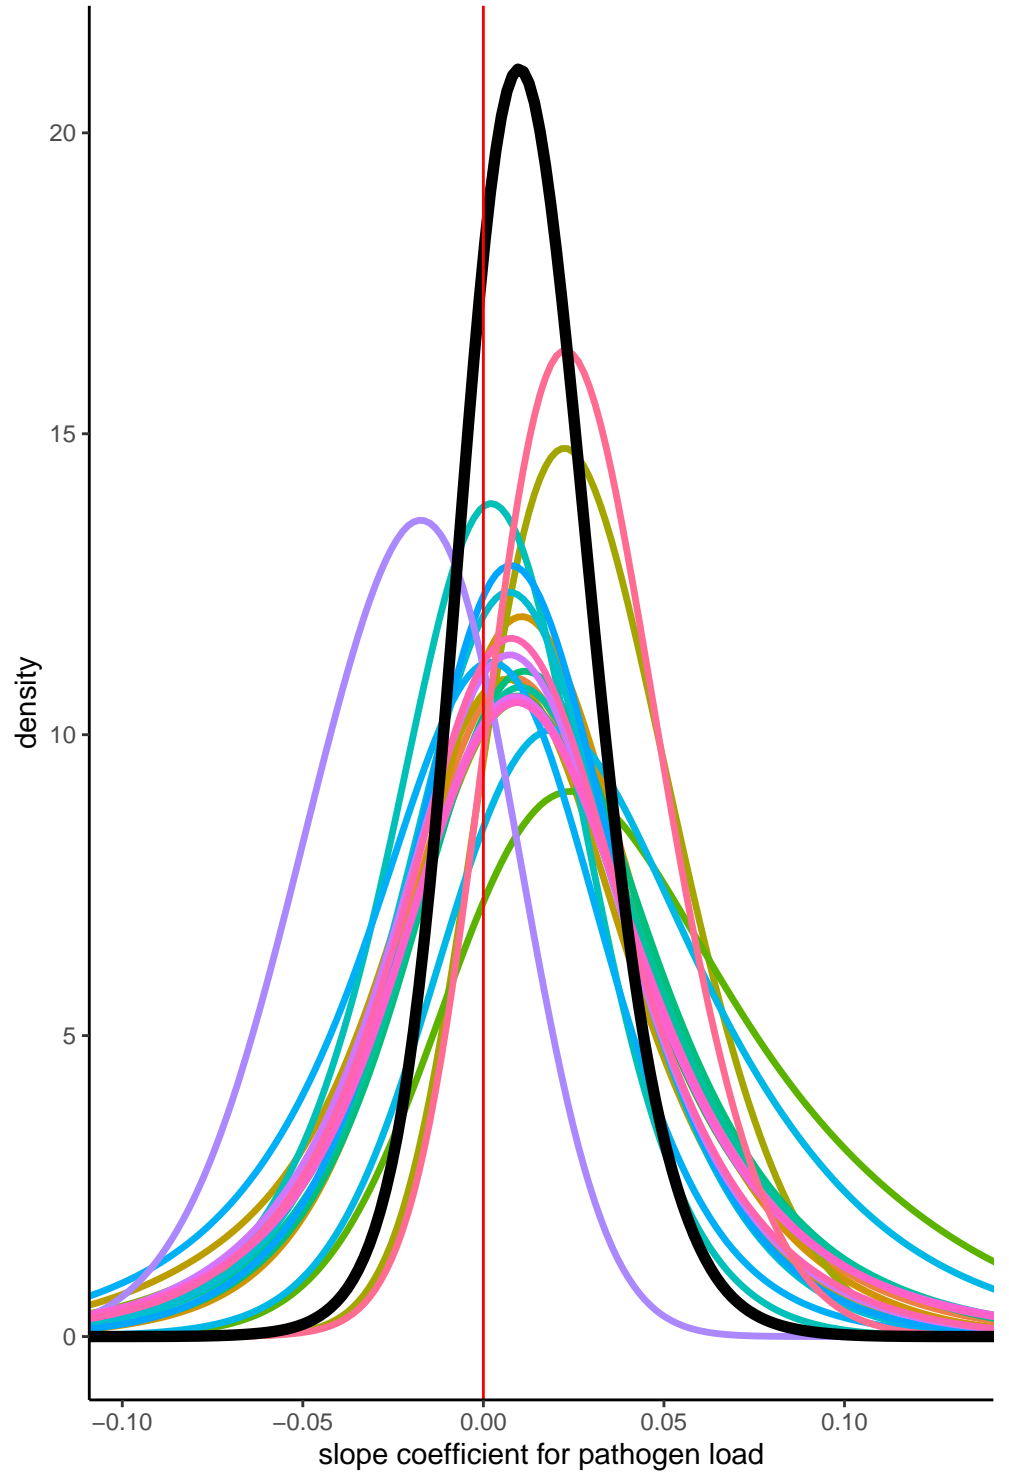

Candidatus Branchiomonas cysticola SpSu

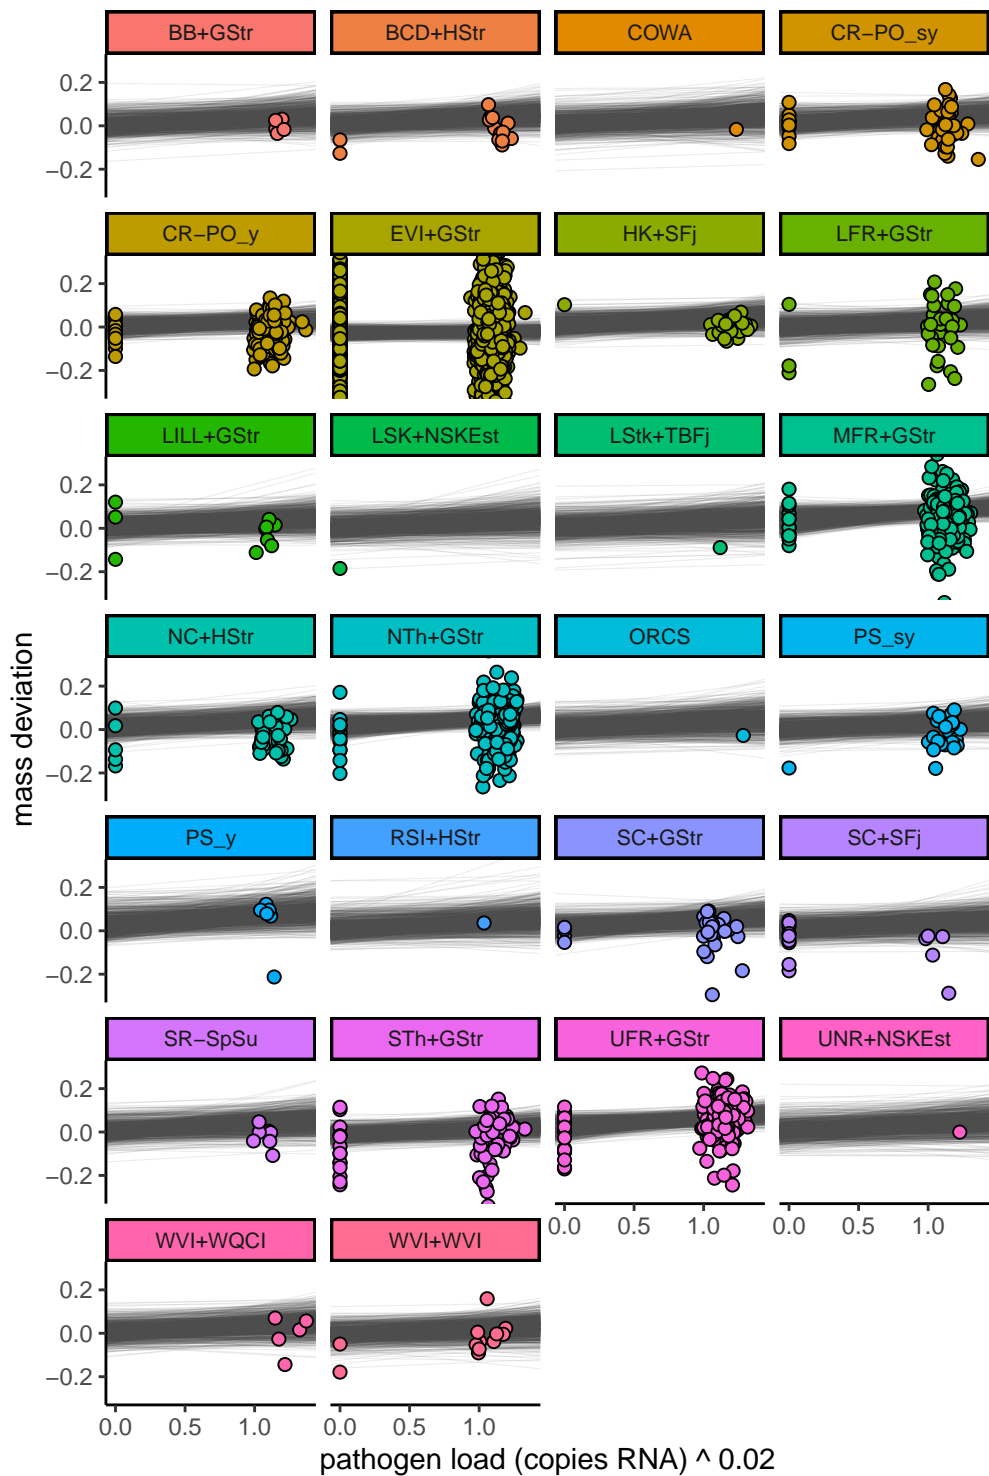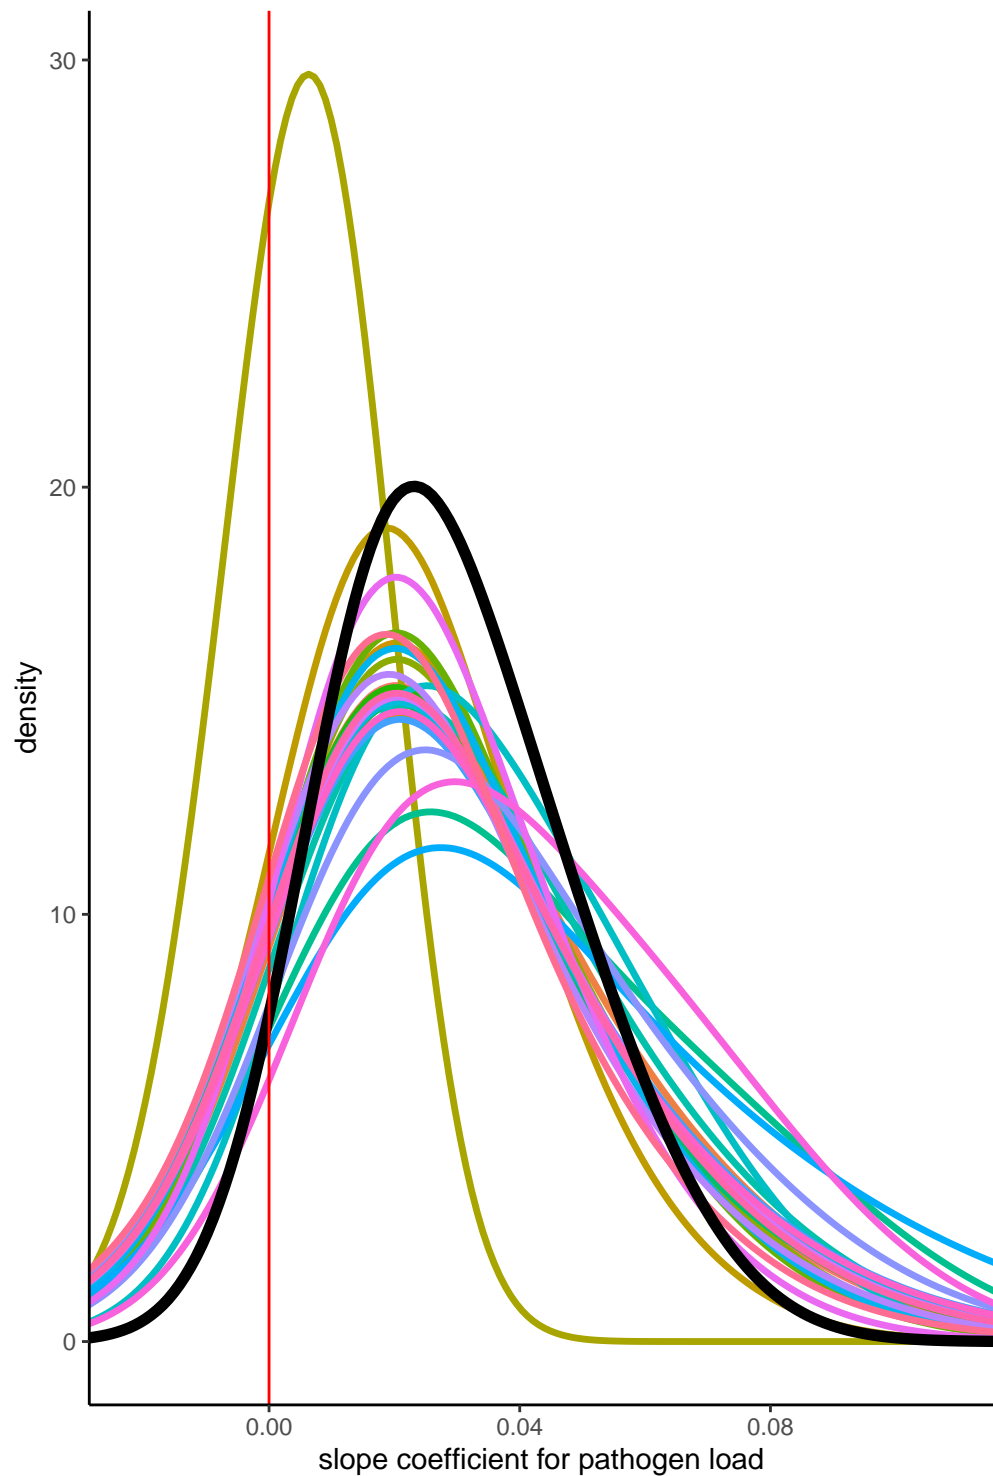

Candidatus Branchiomonas cysticola FaWi

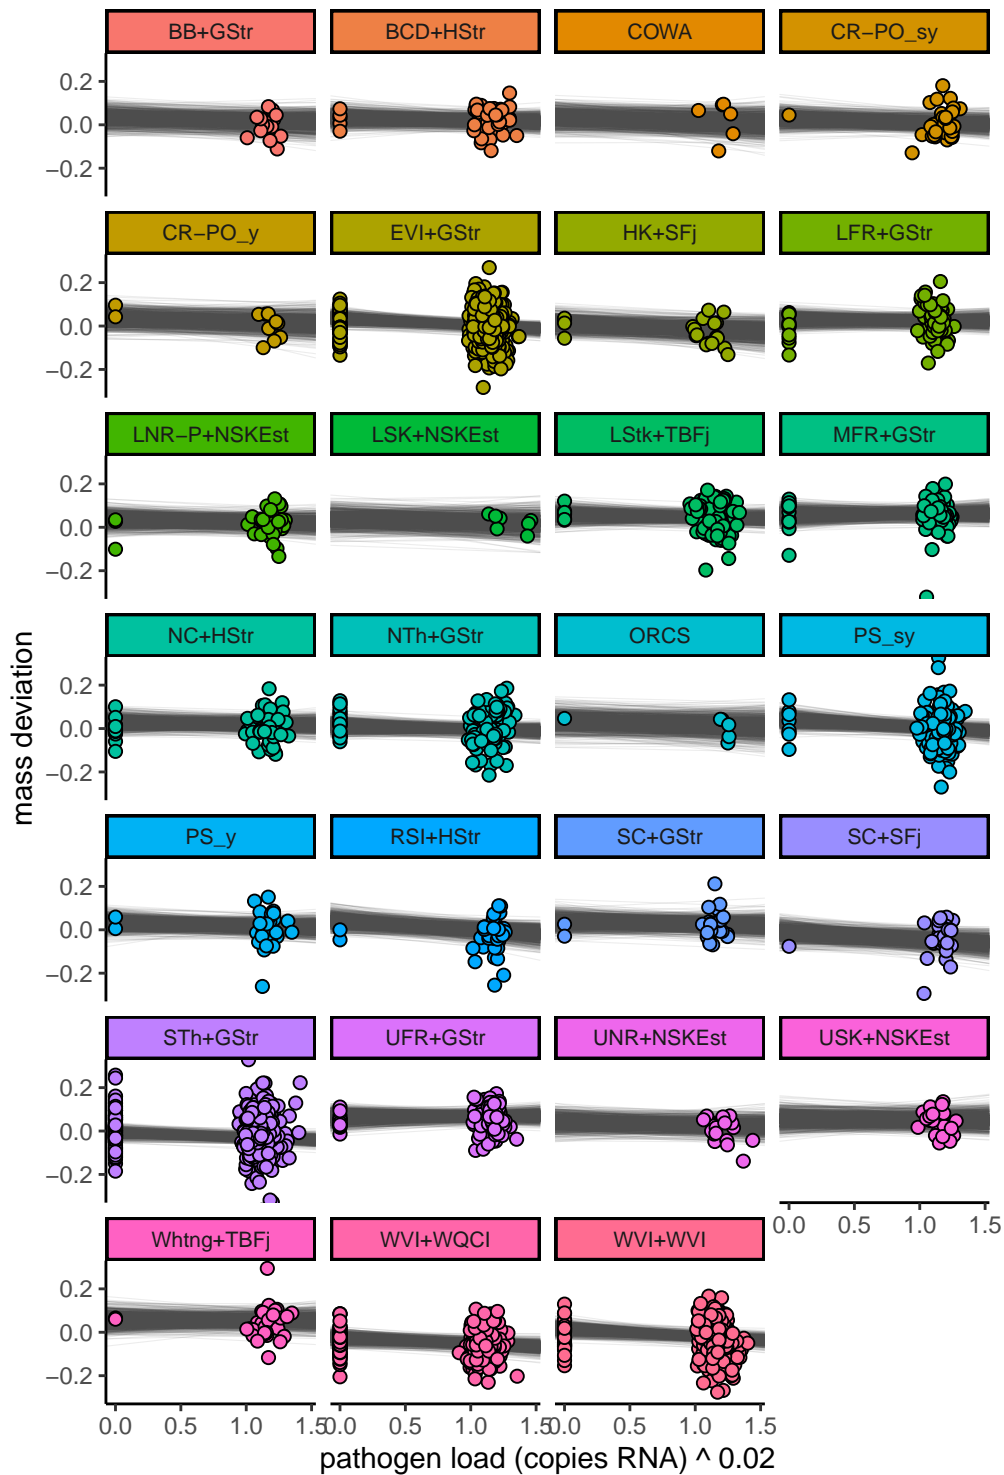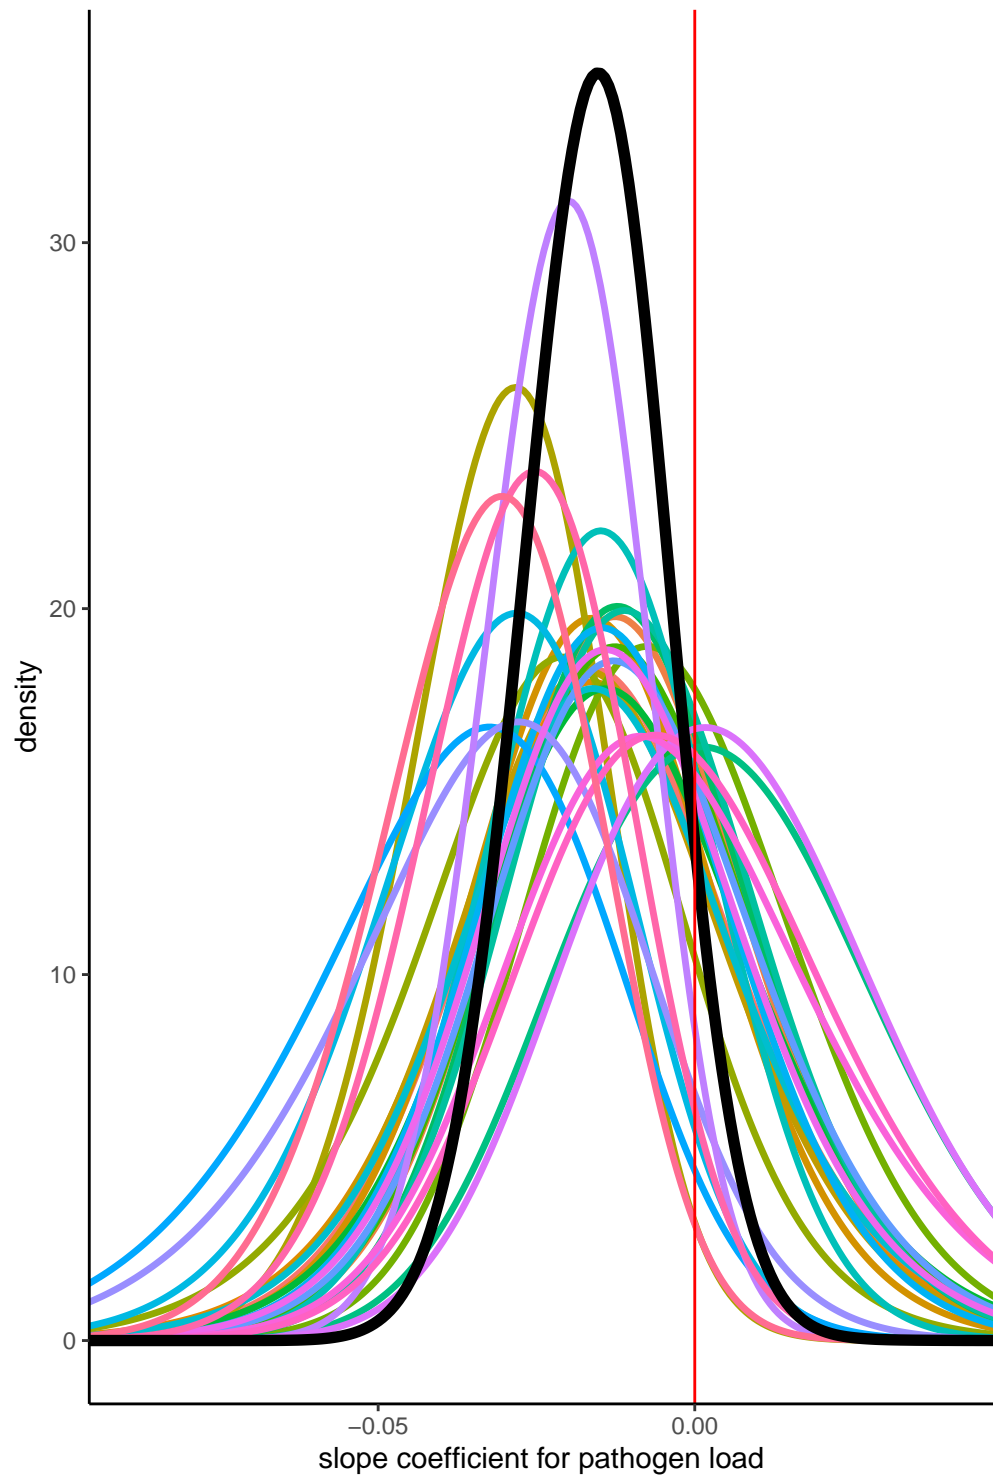

Ceratonova shasta SpSu

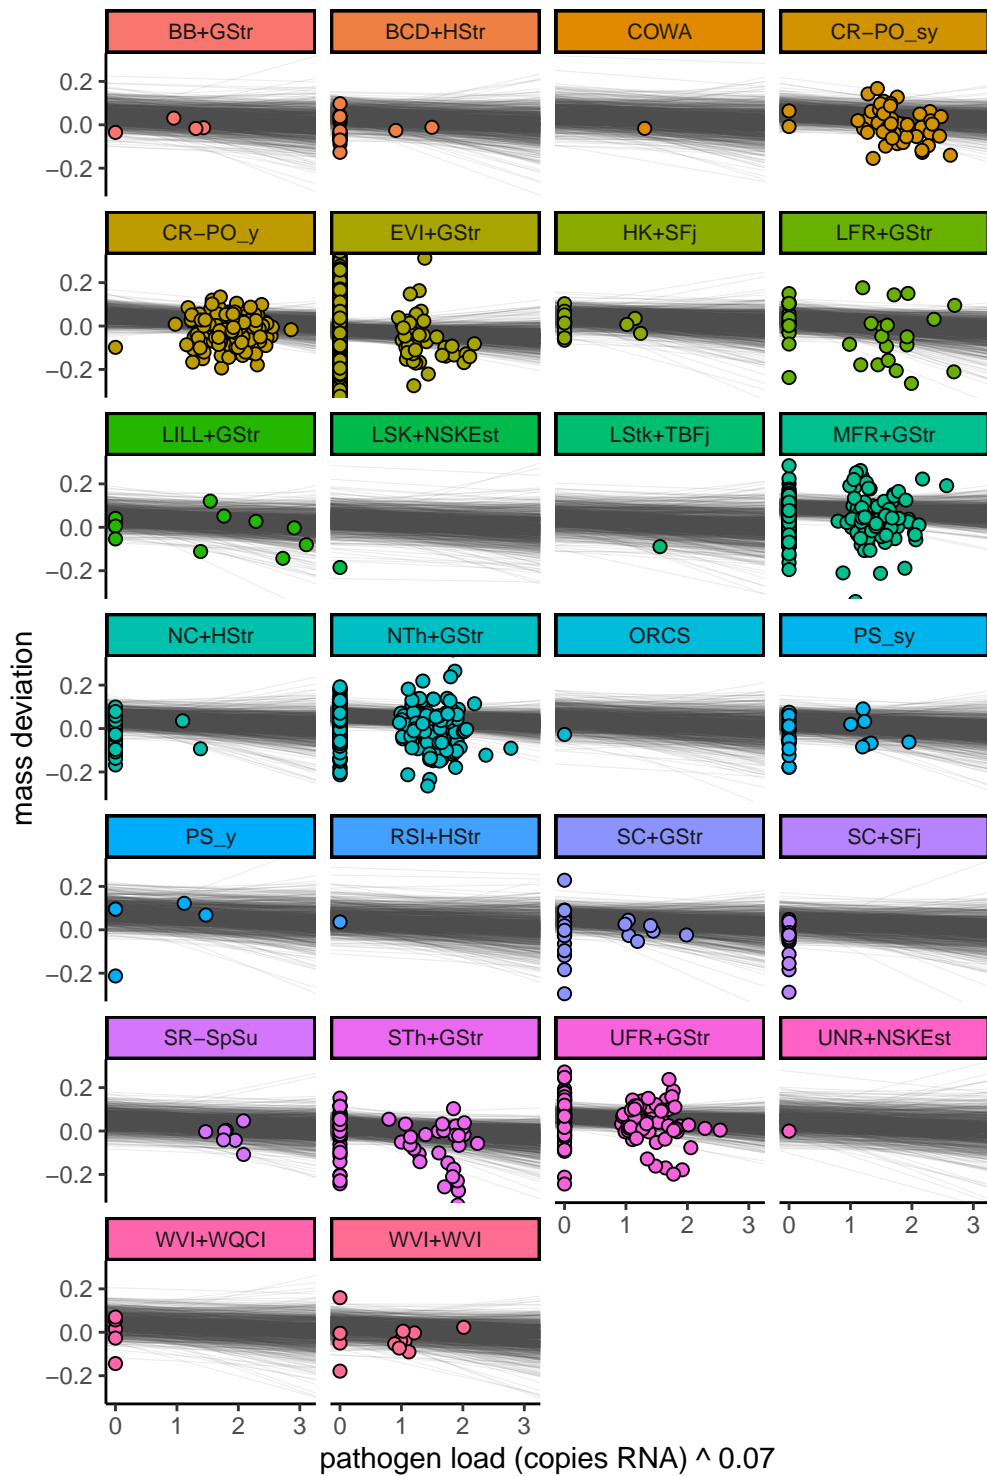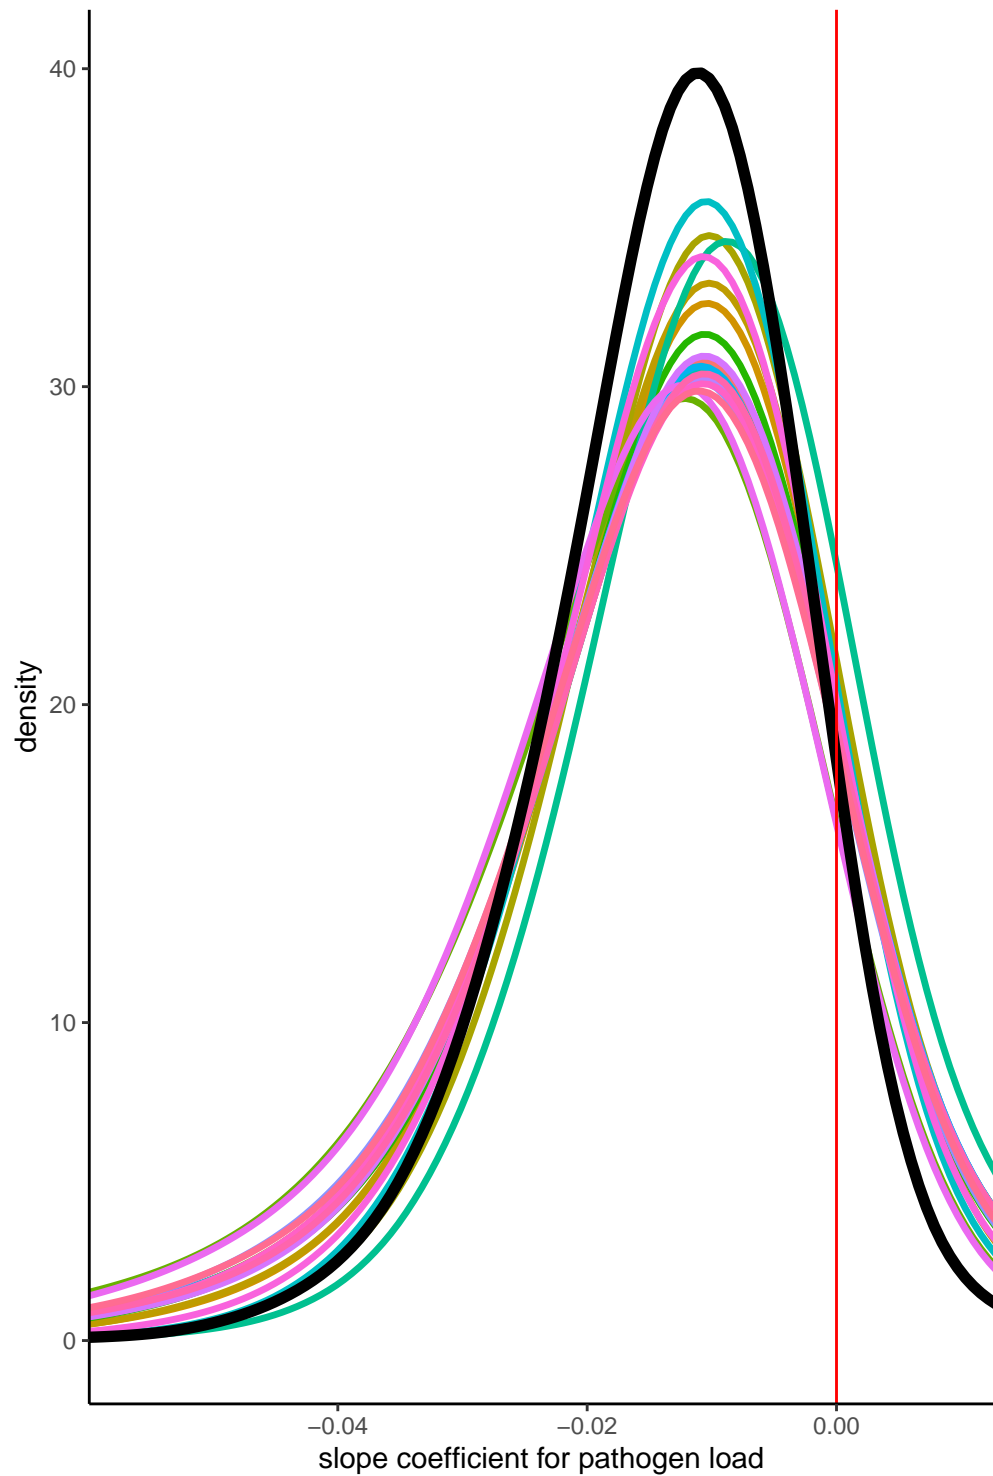

Ceratonova shasta FaWi

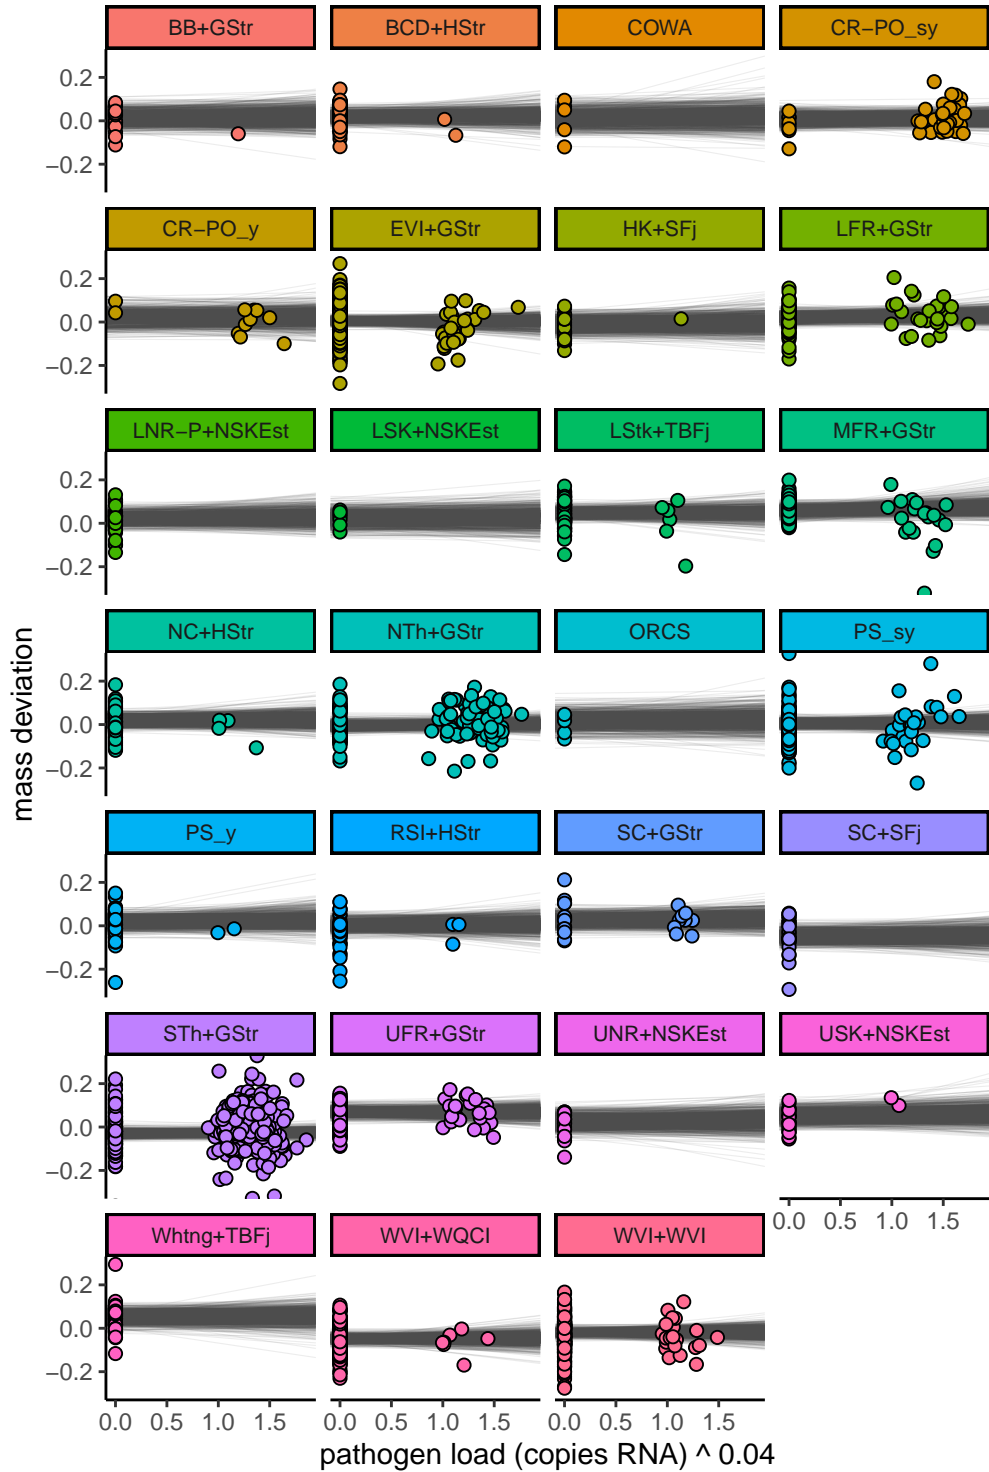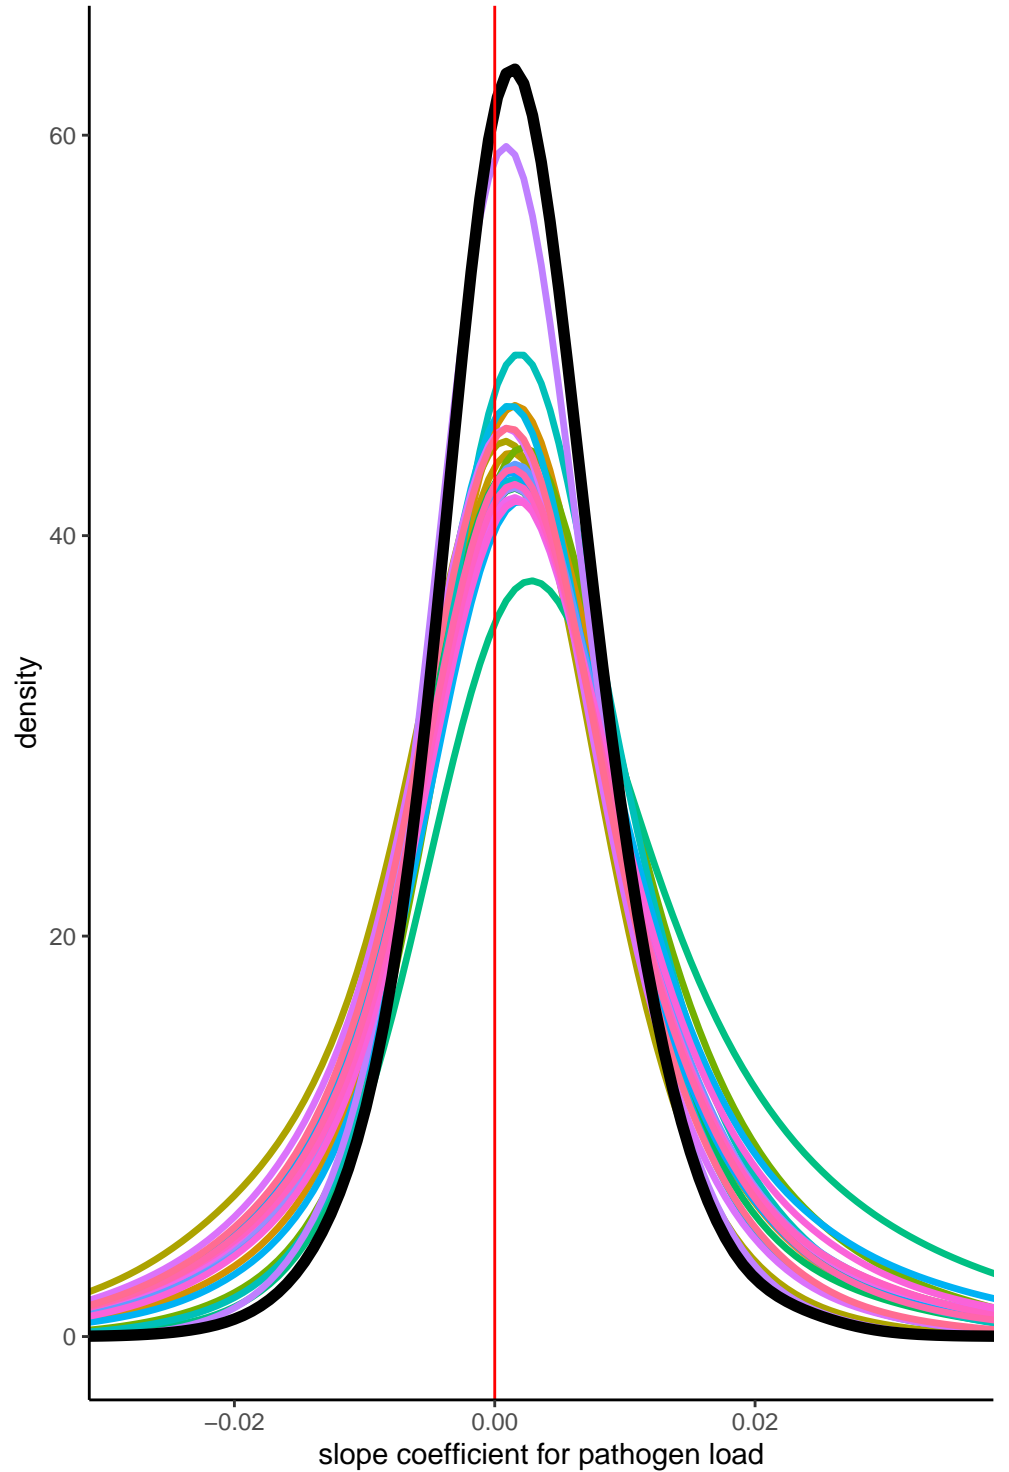

Pacific Salmon Nidovirus SpSu

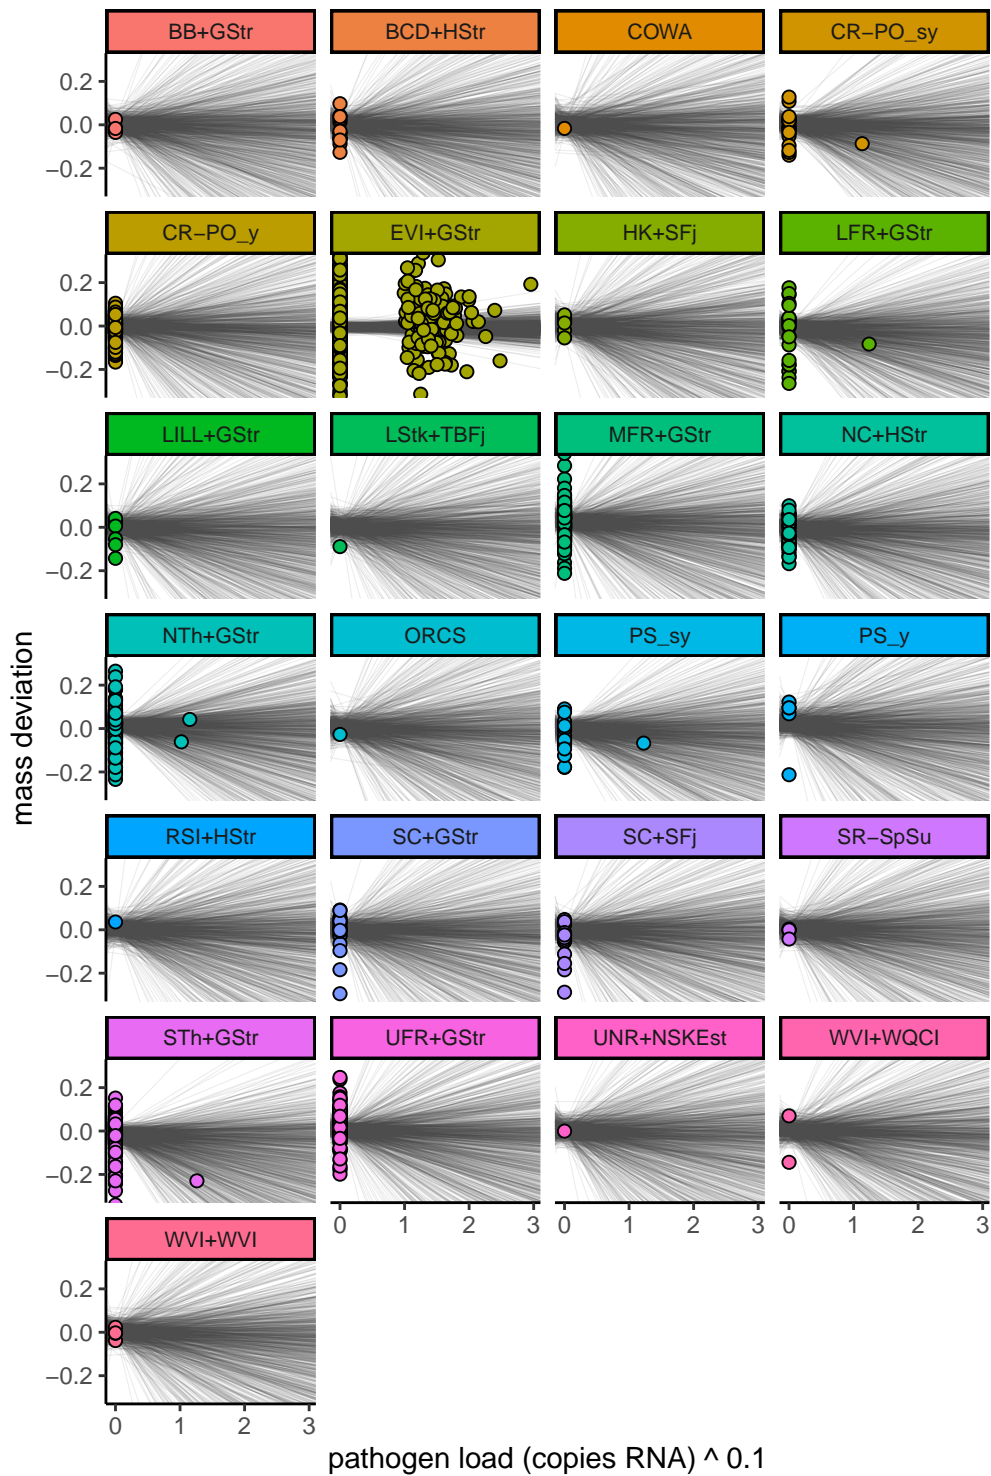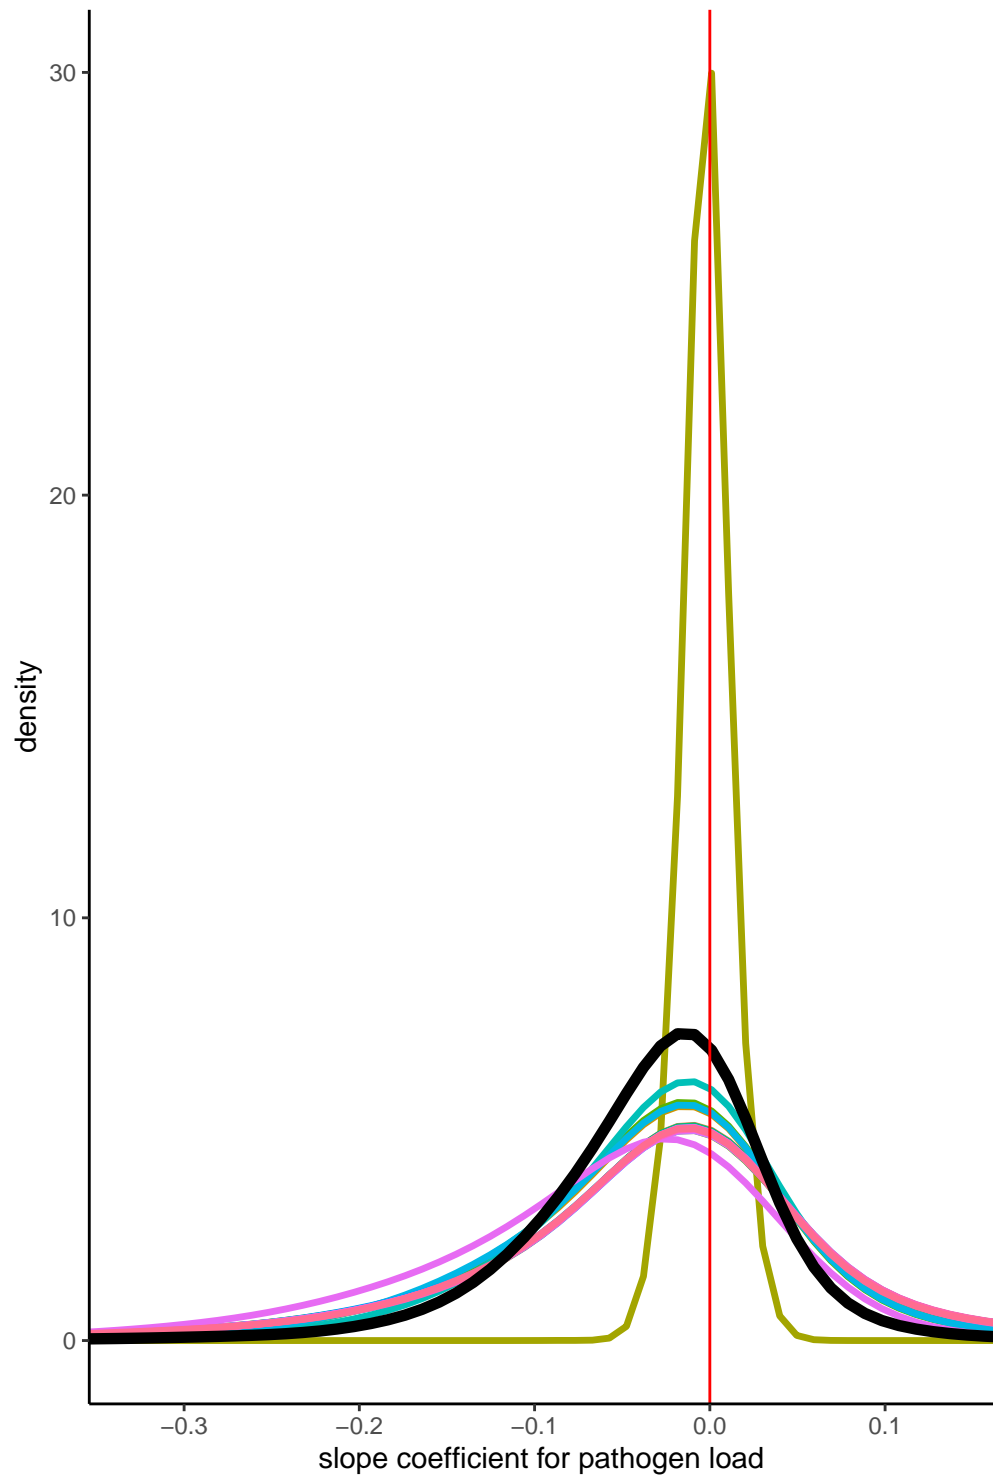



Facilispora margolisi SpSu

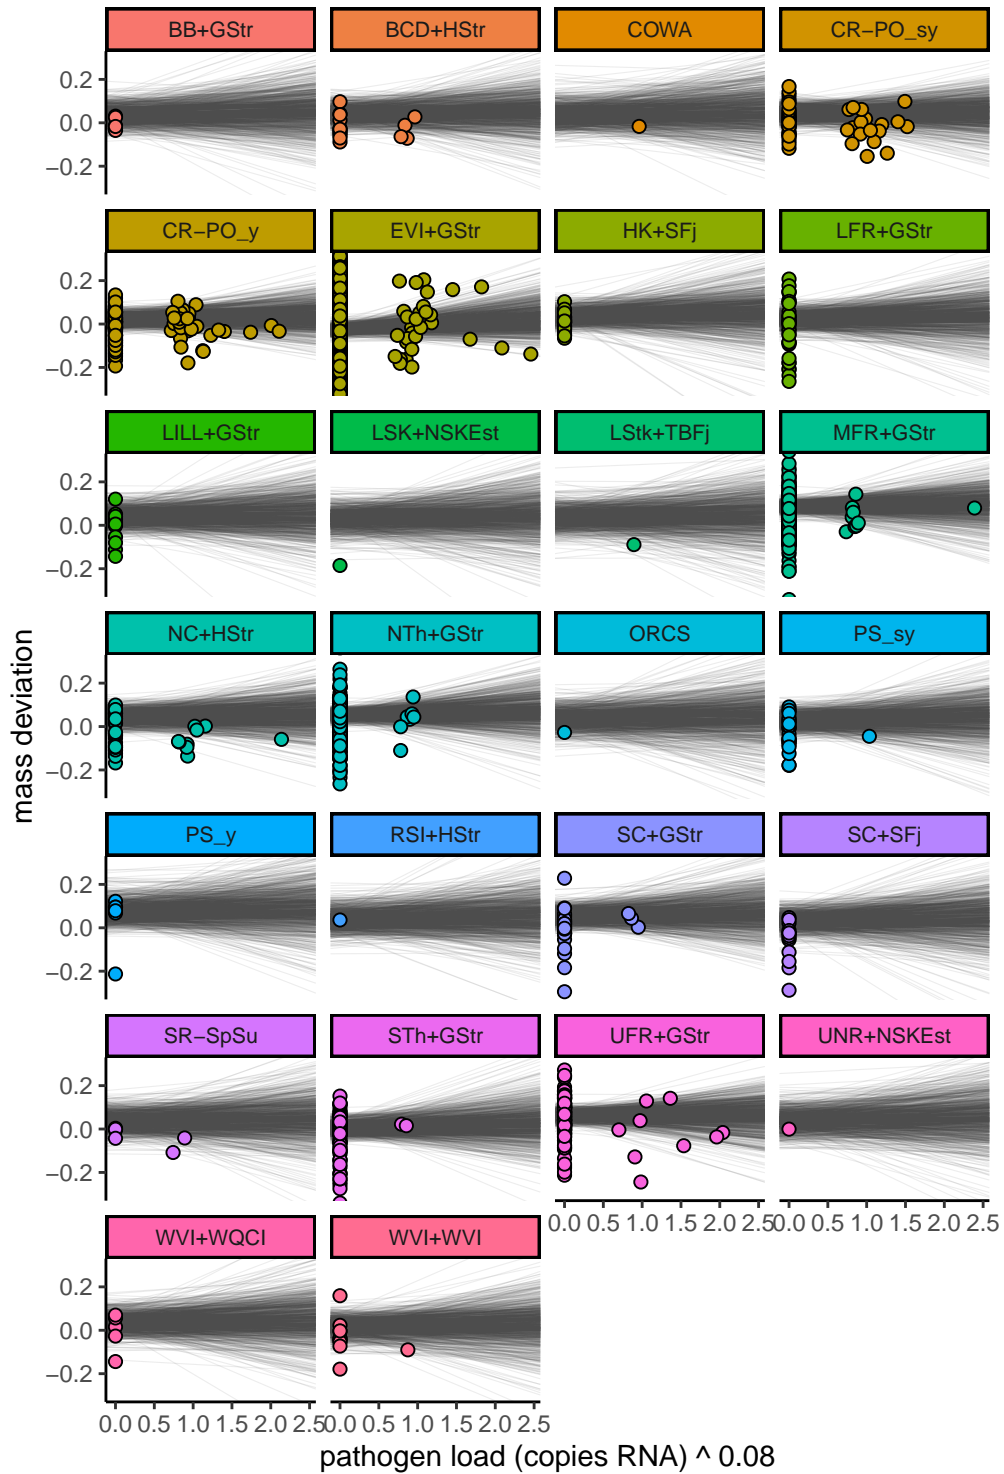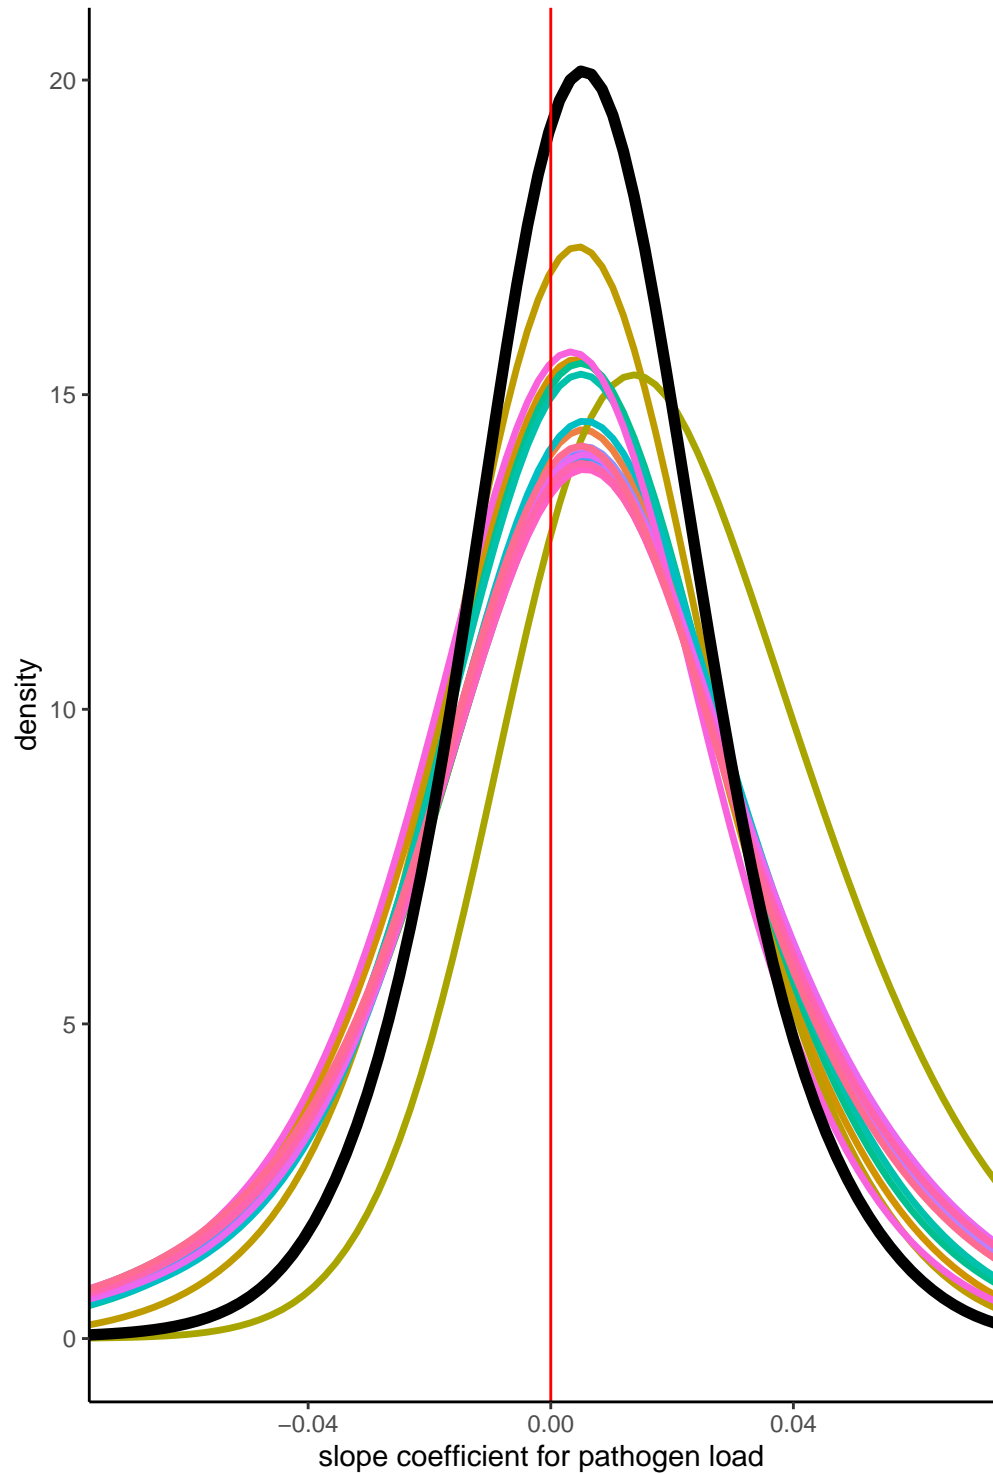

*Facilispora margolisi* FaWi

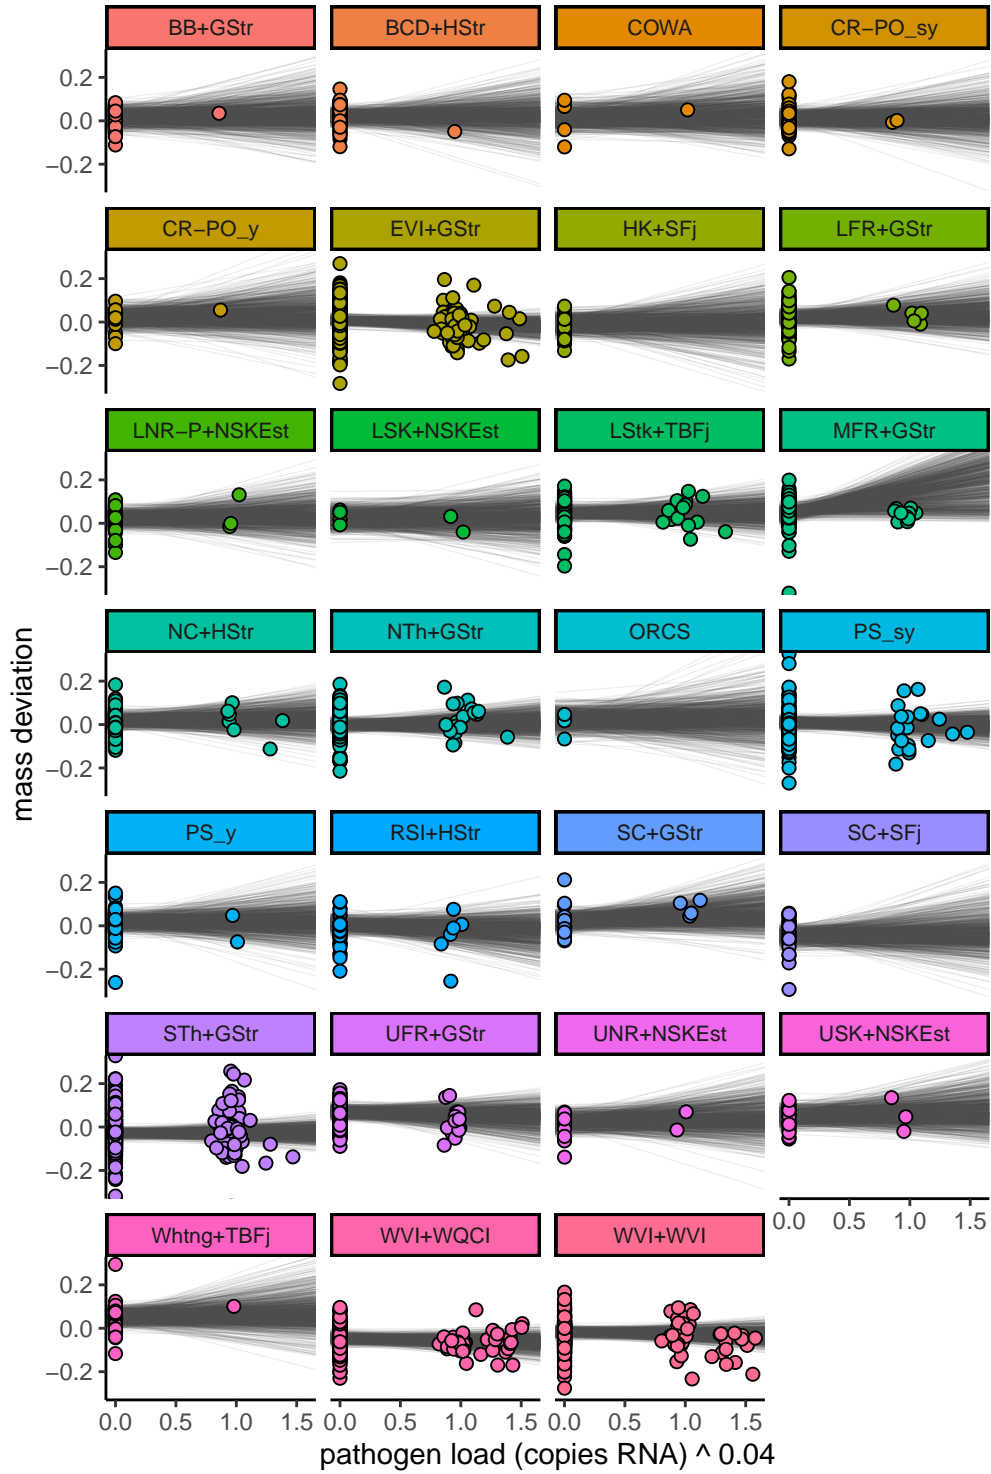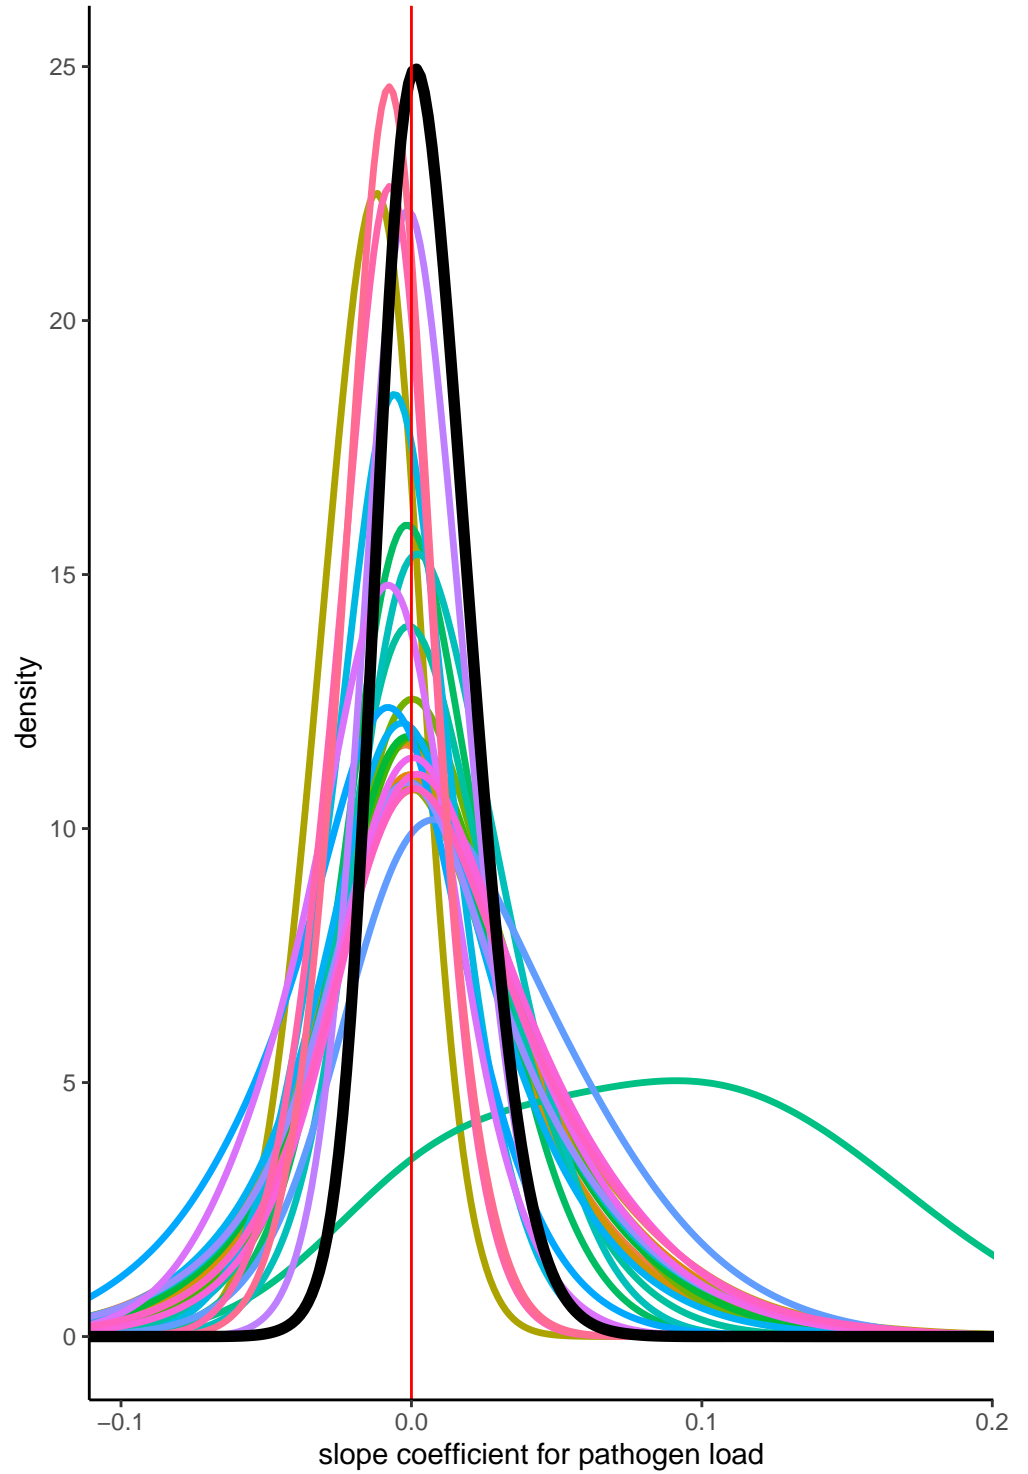

Flavobacterium psychrophilum SpSu

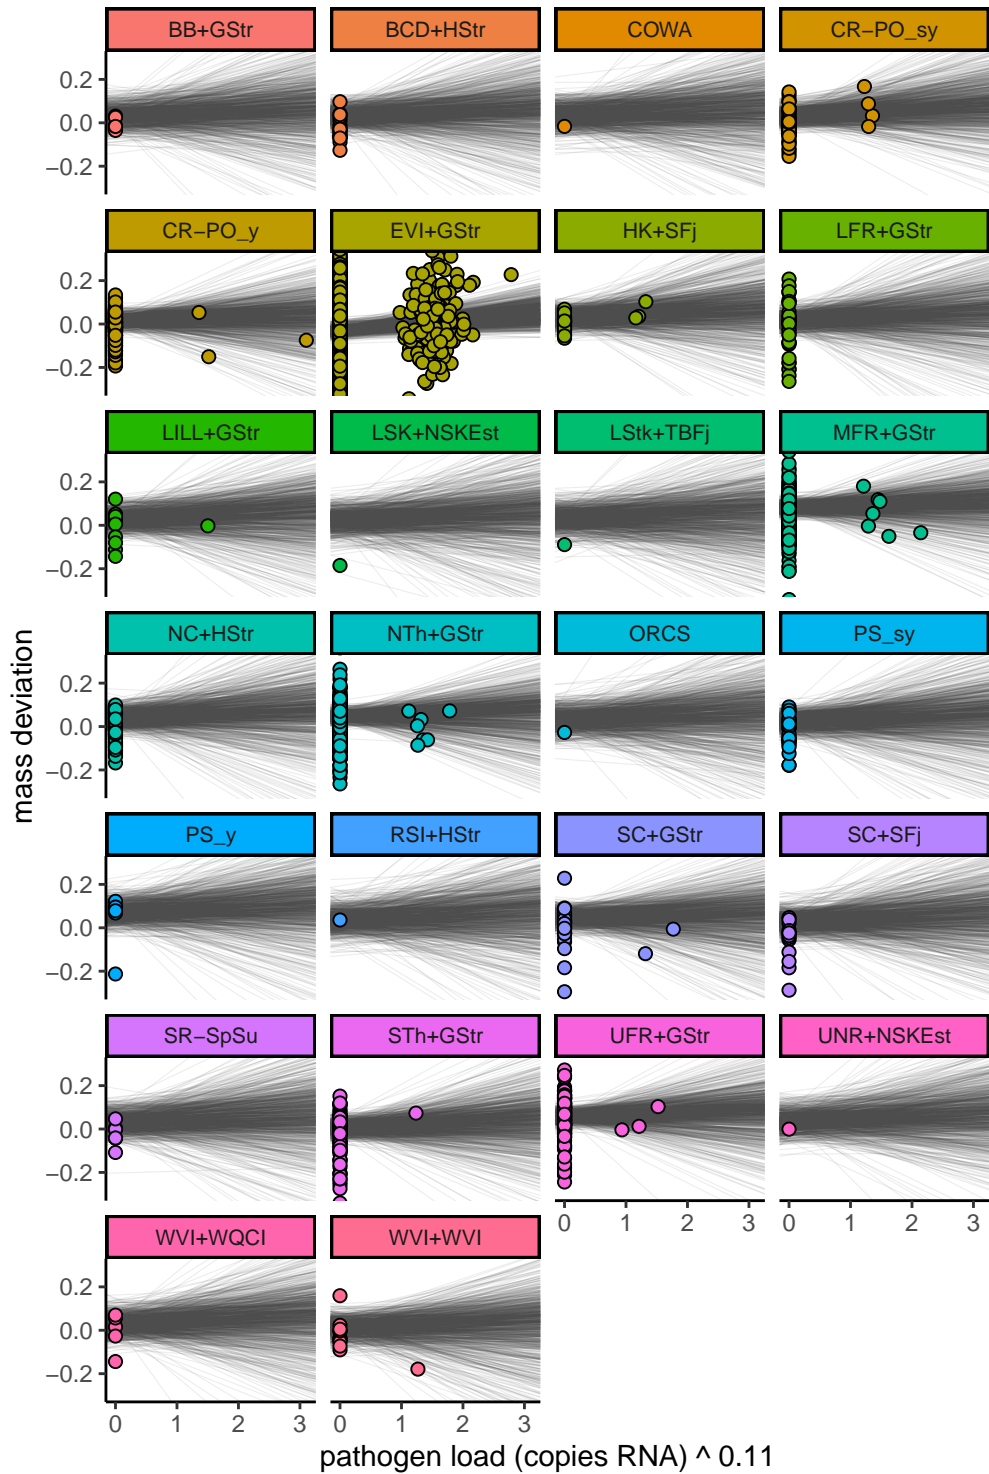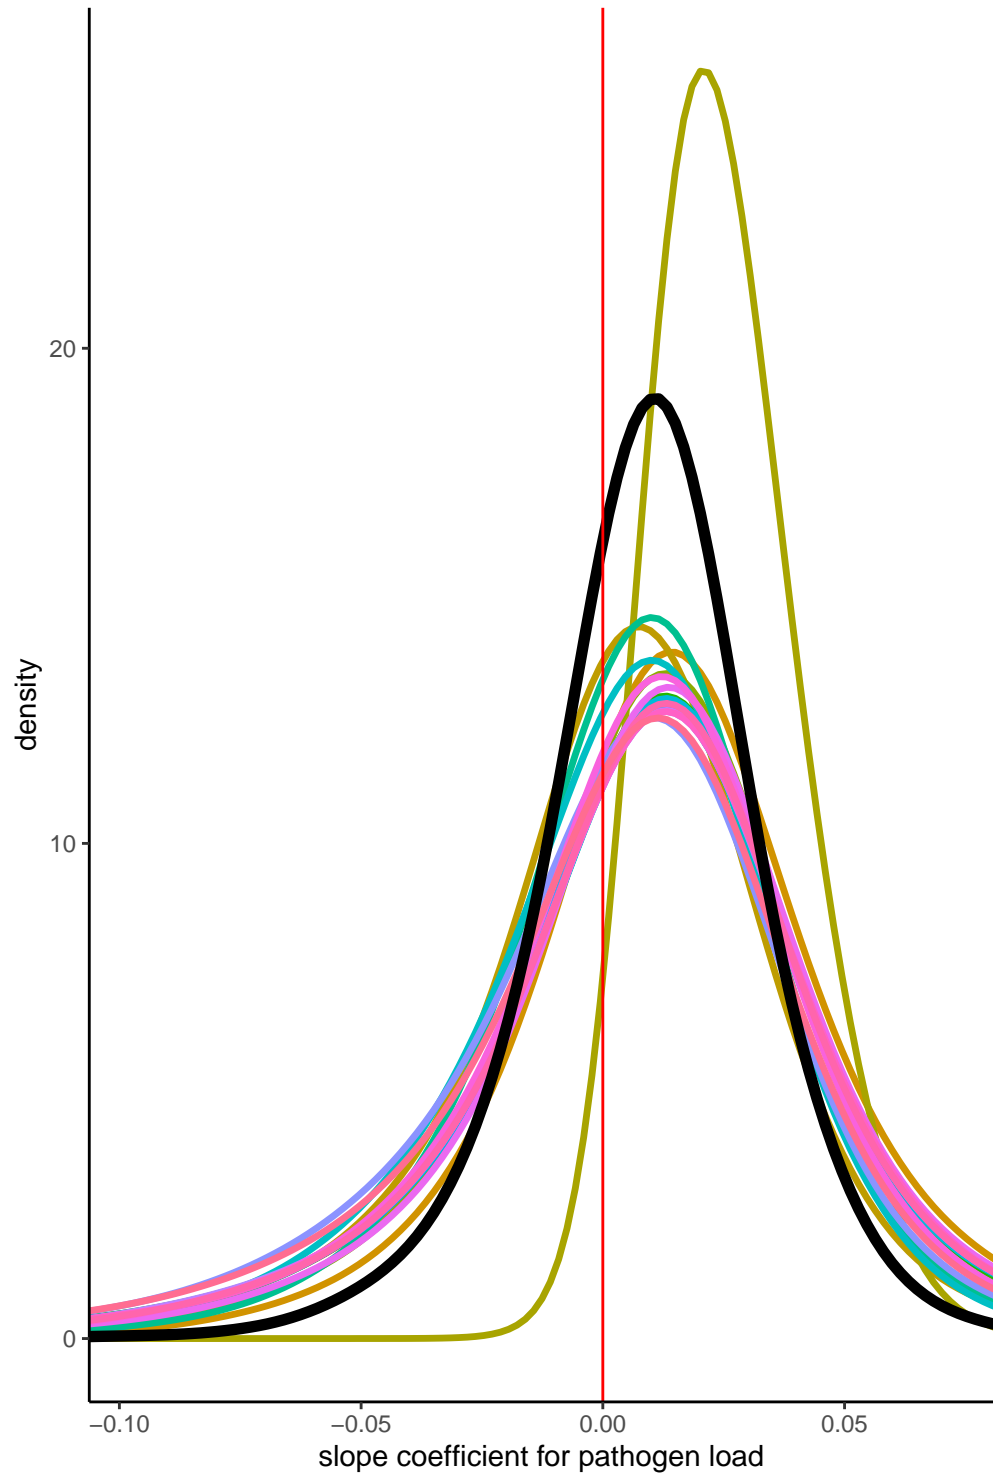

Flavobacterium psychrophilum FaWi

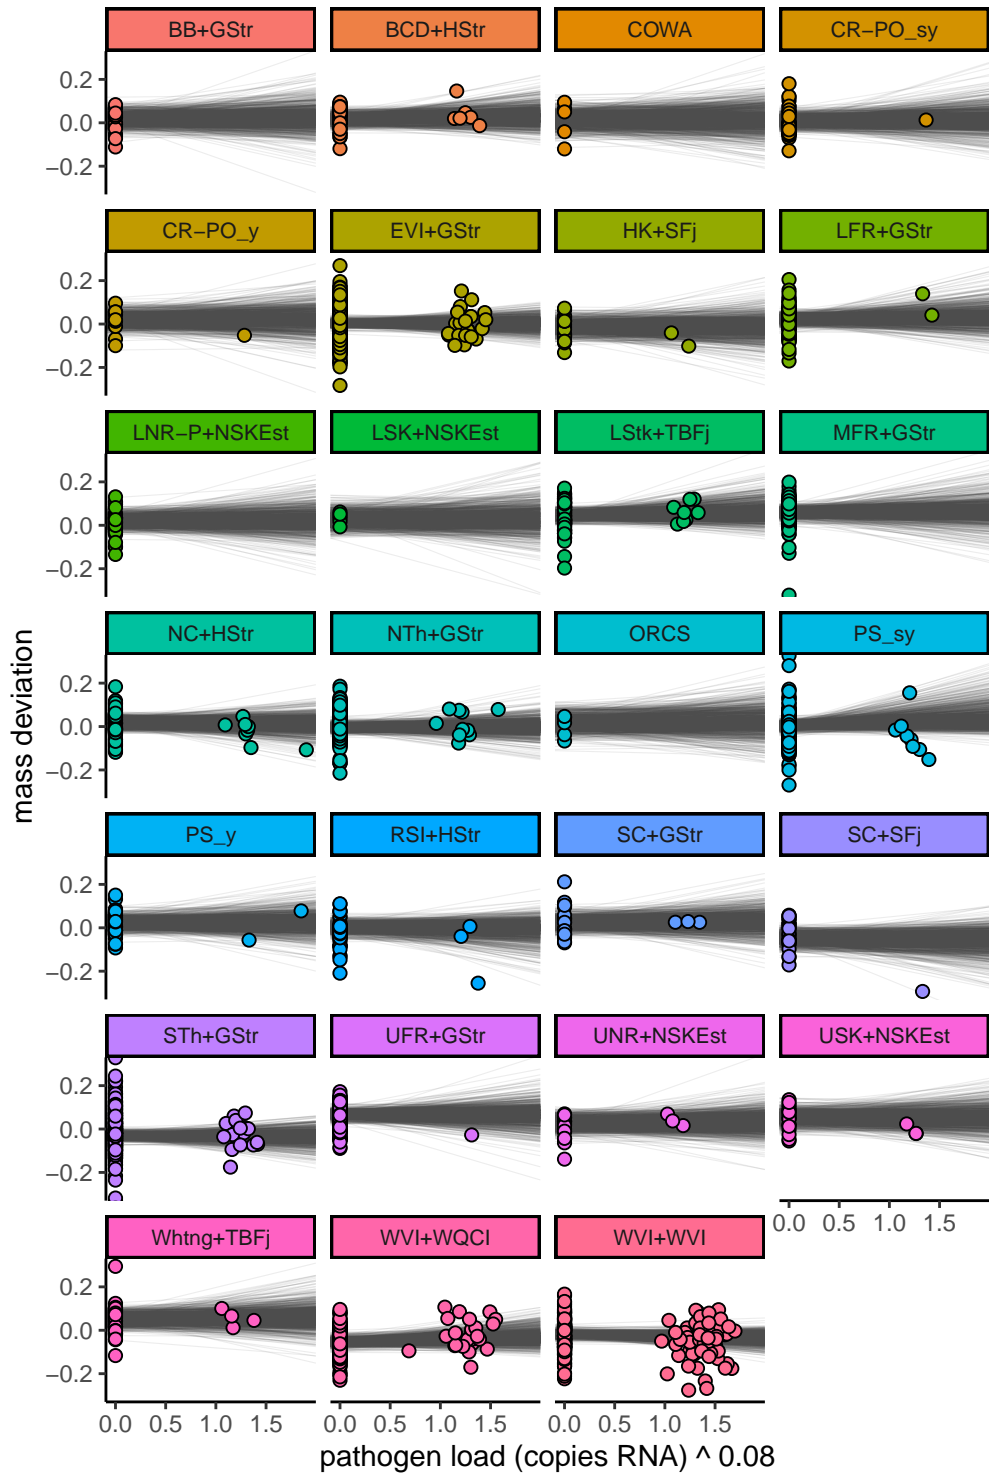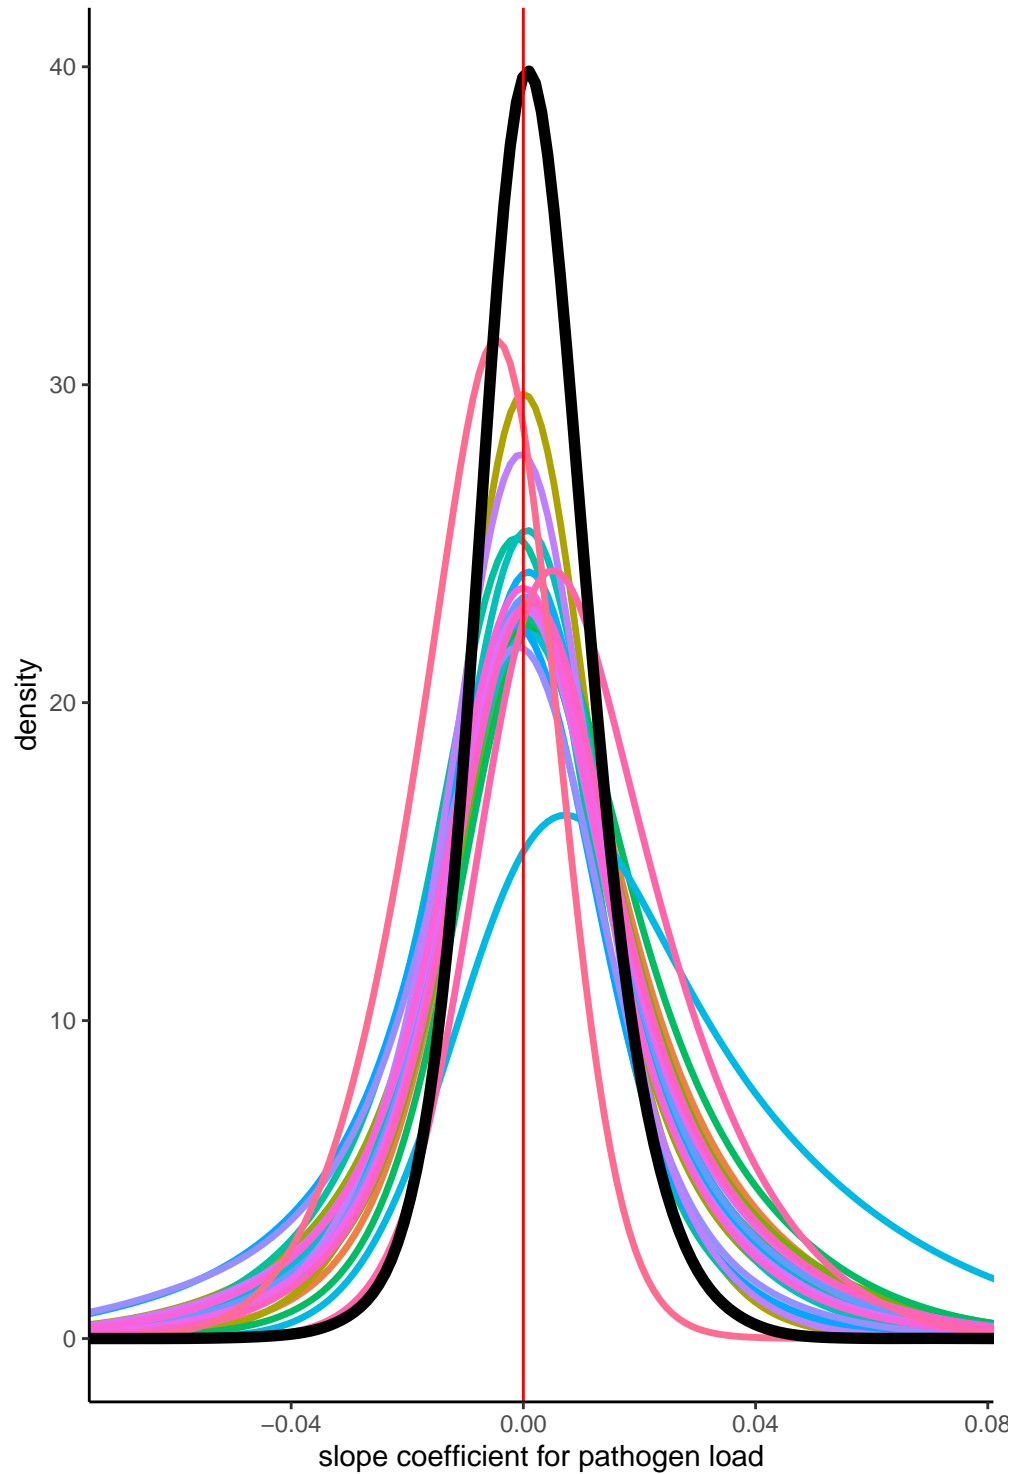

Ichthyophonus hoferi SpSu

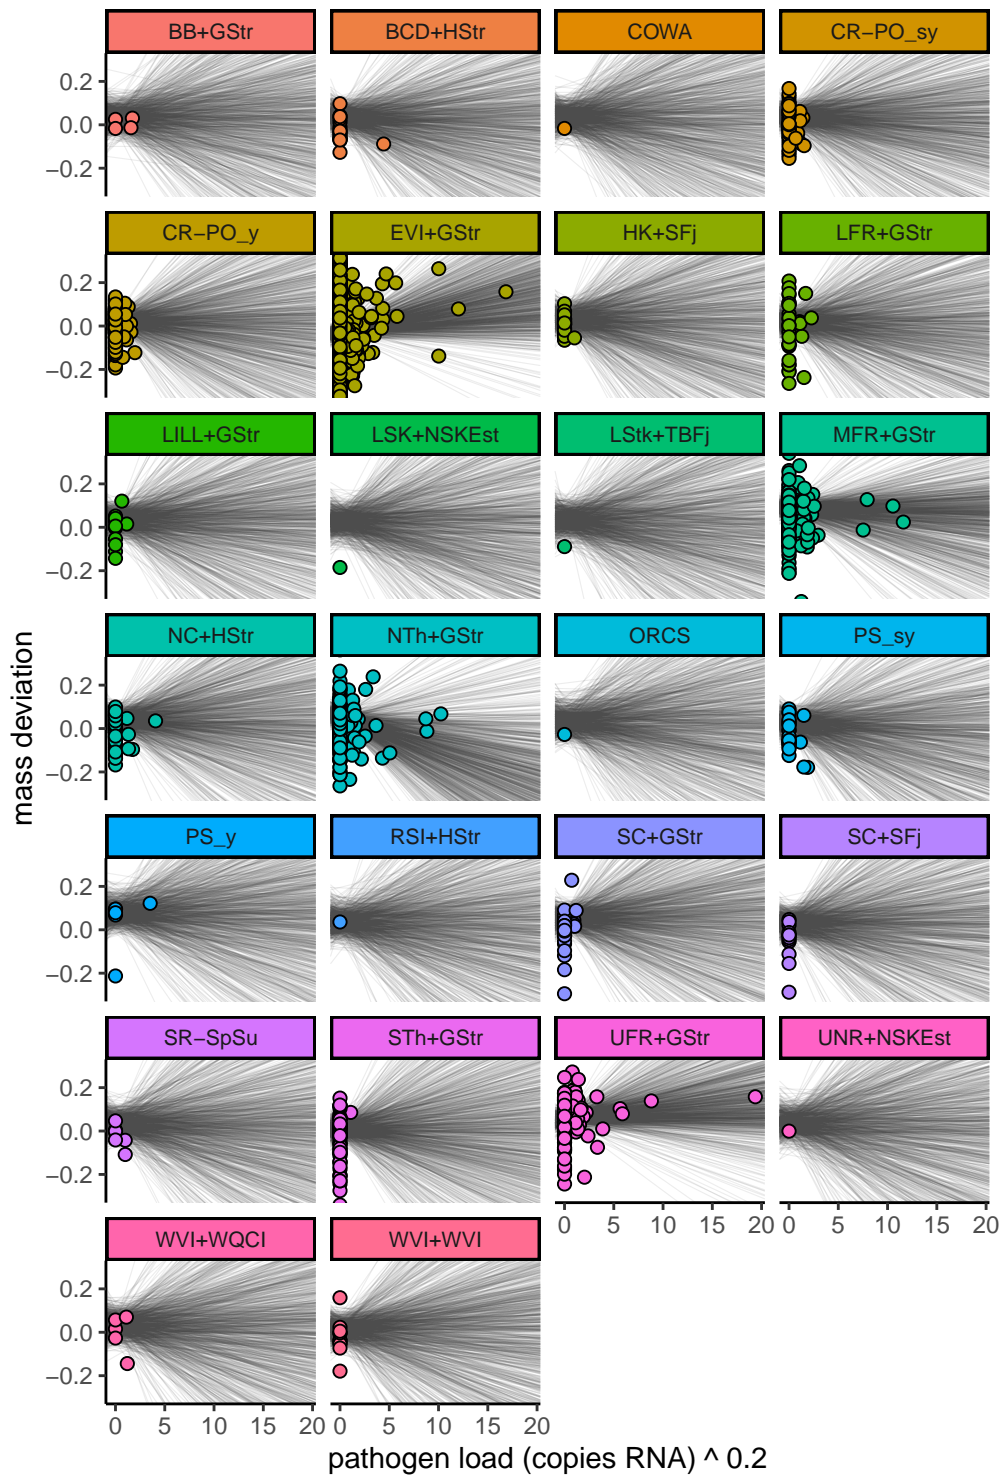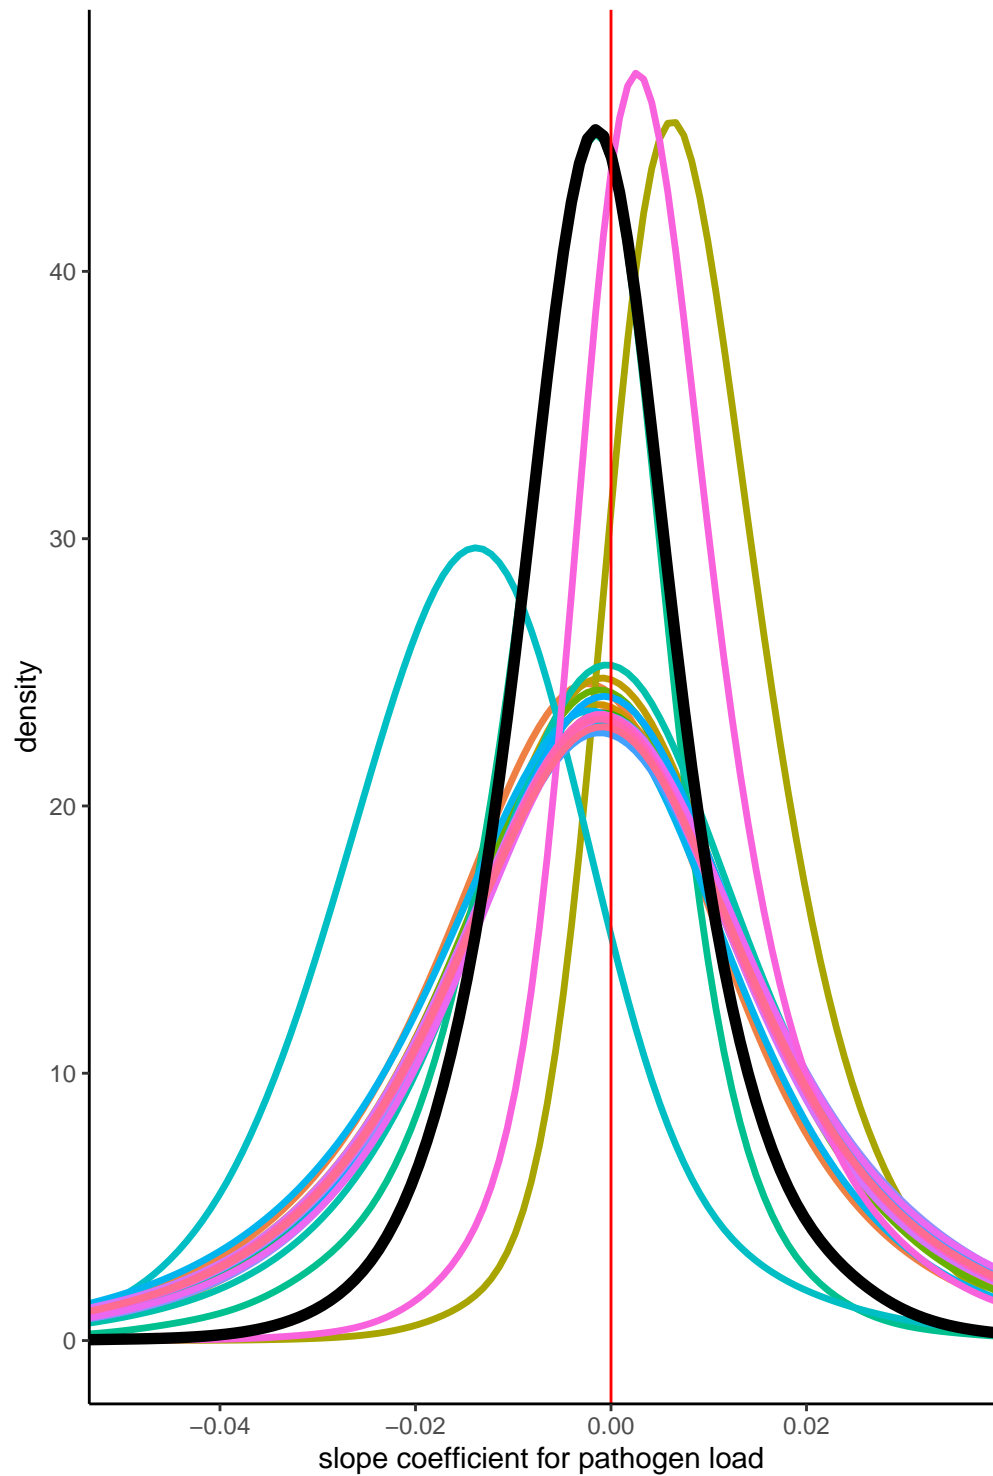

Ichthyophonus hoferi FaWi

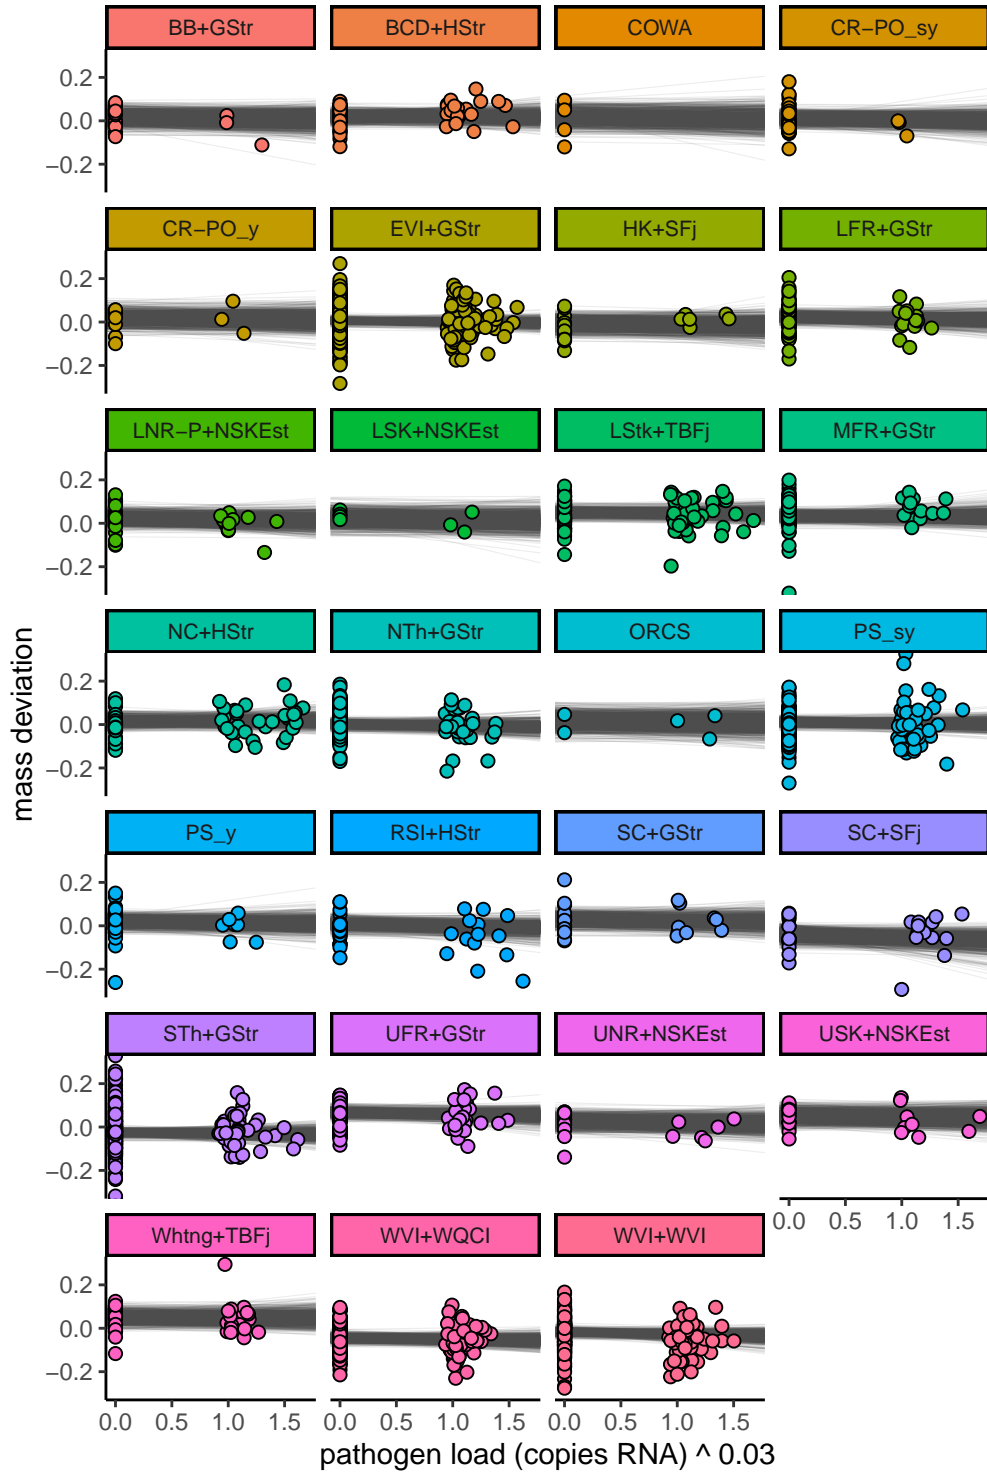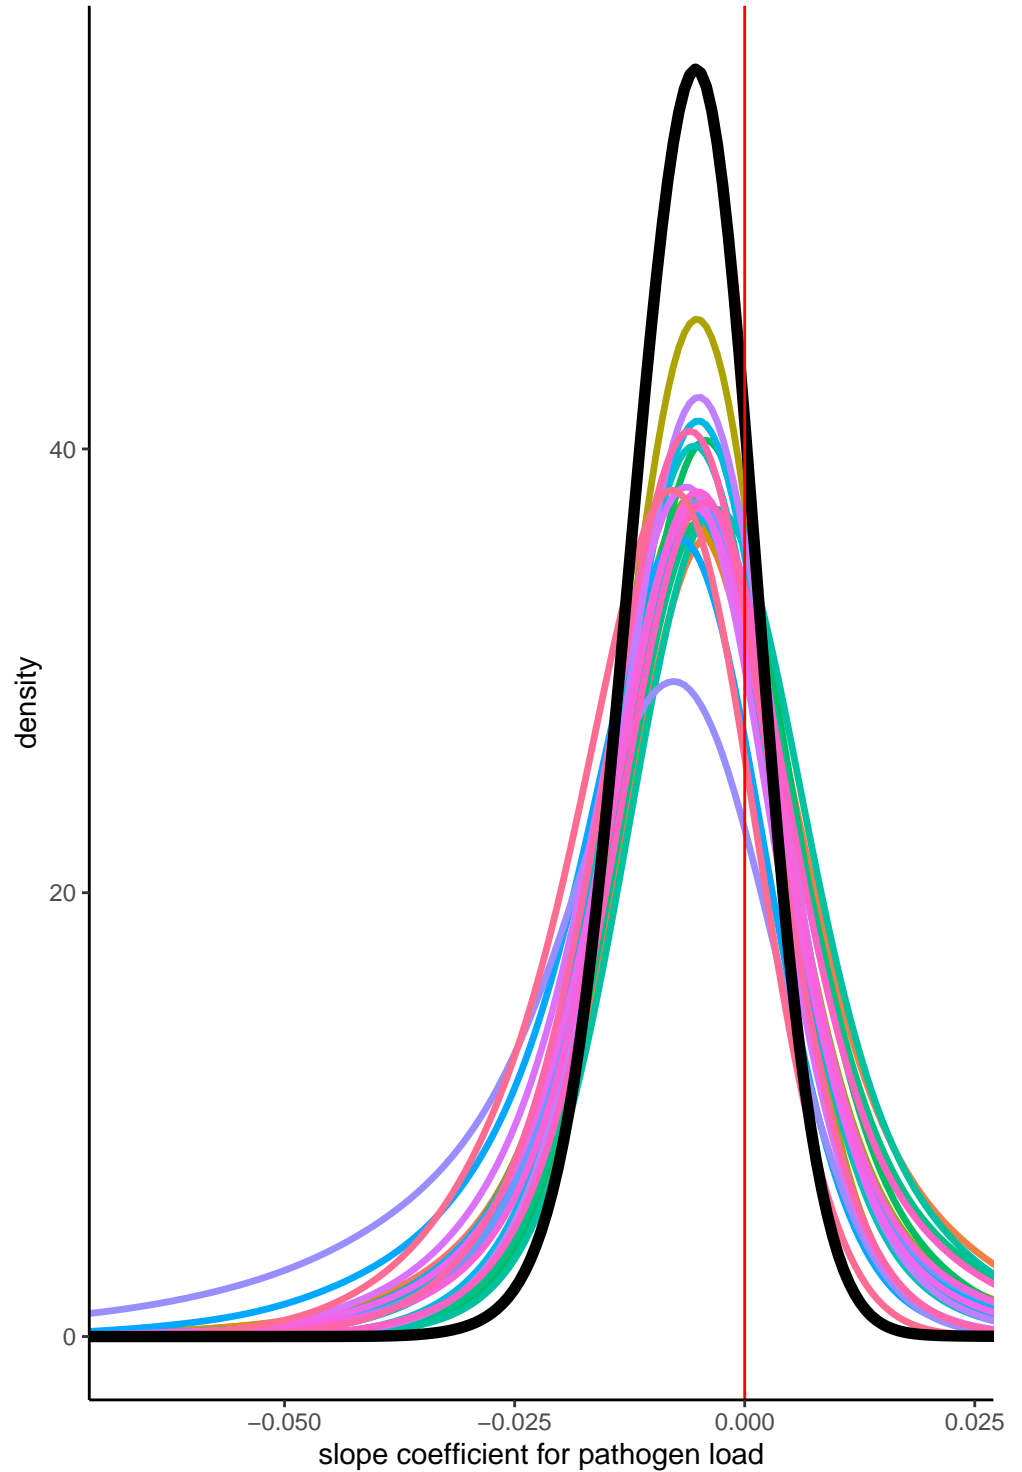

Ichthyophthirius multifiliis SpSu

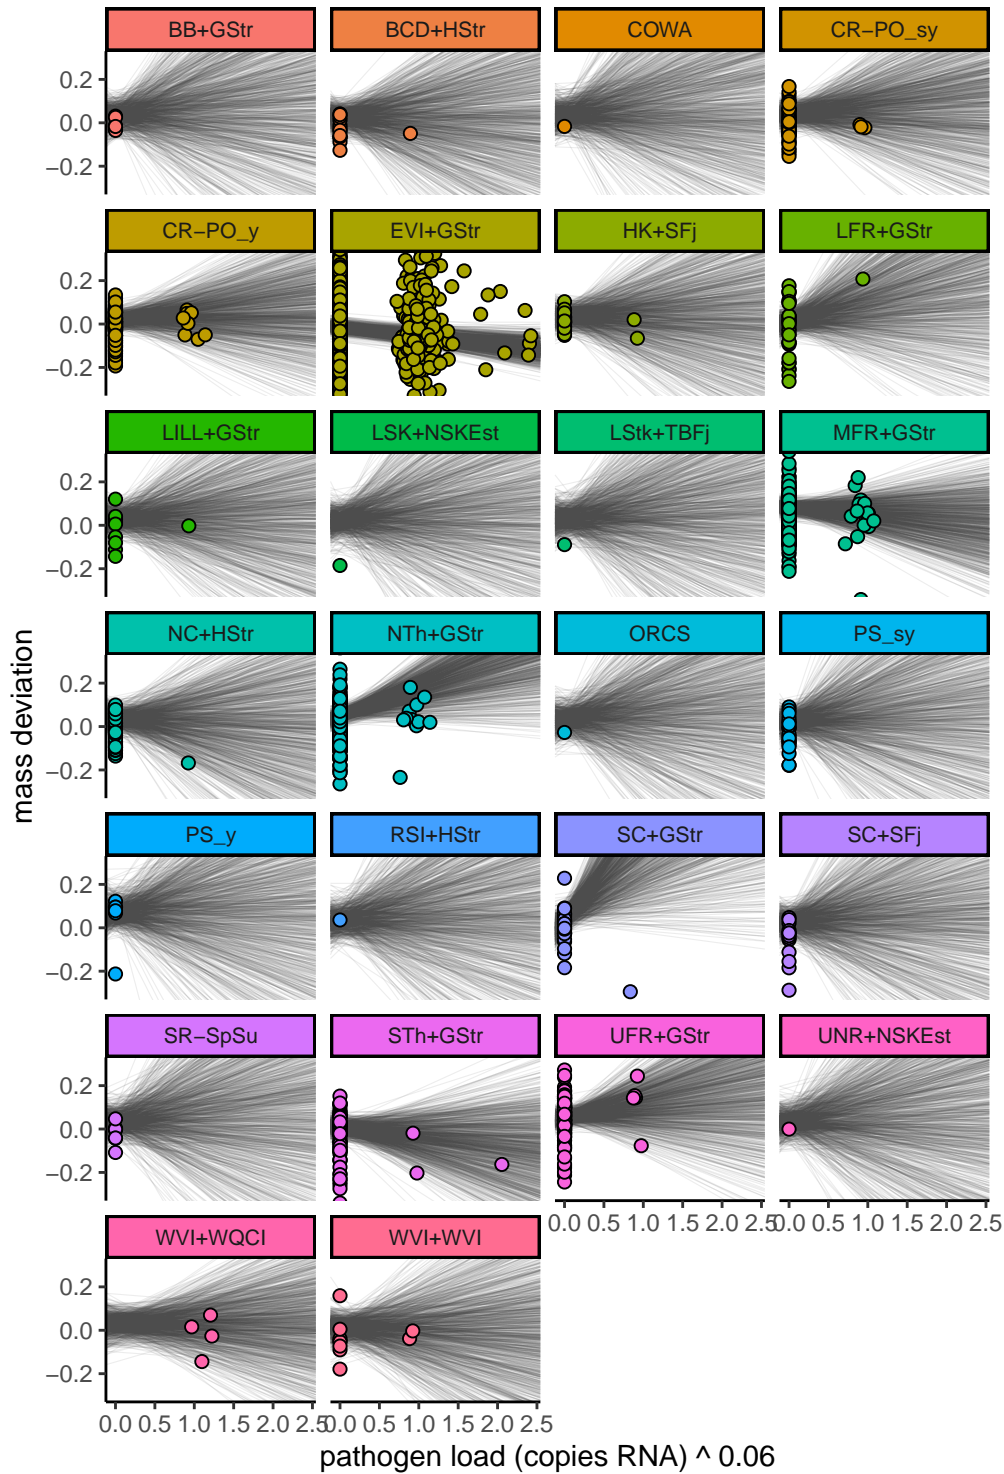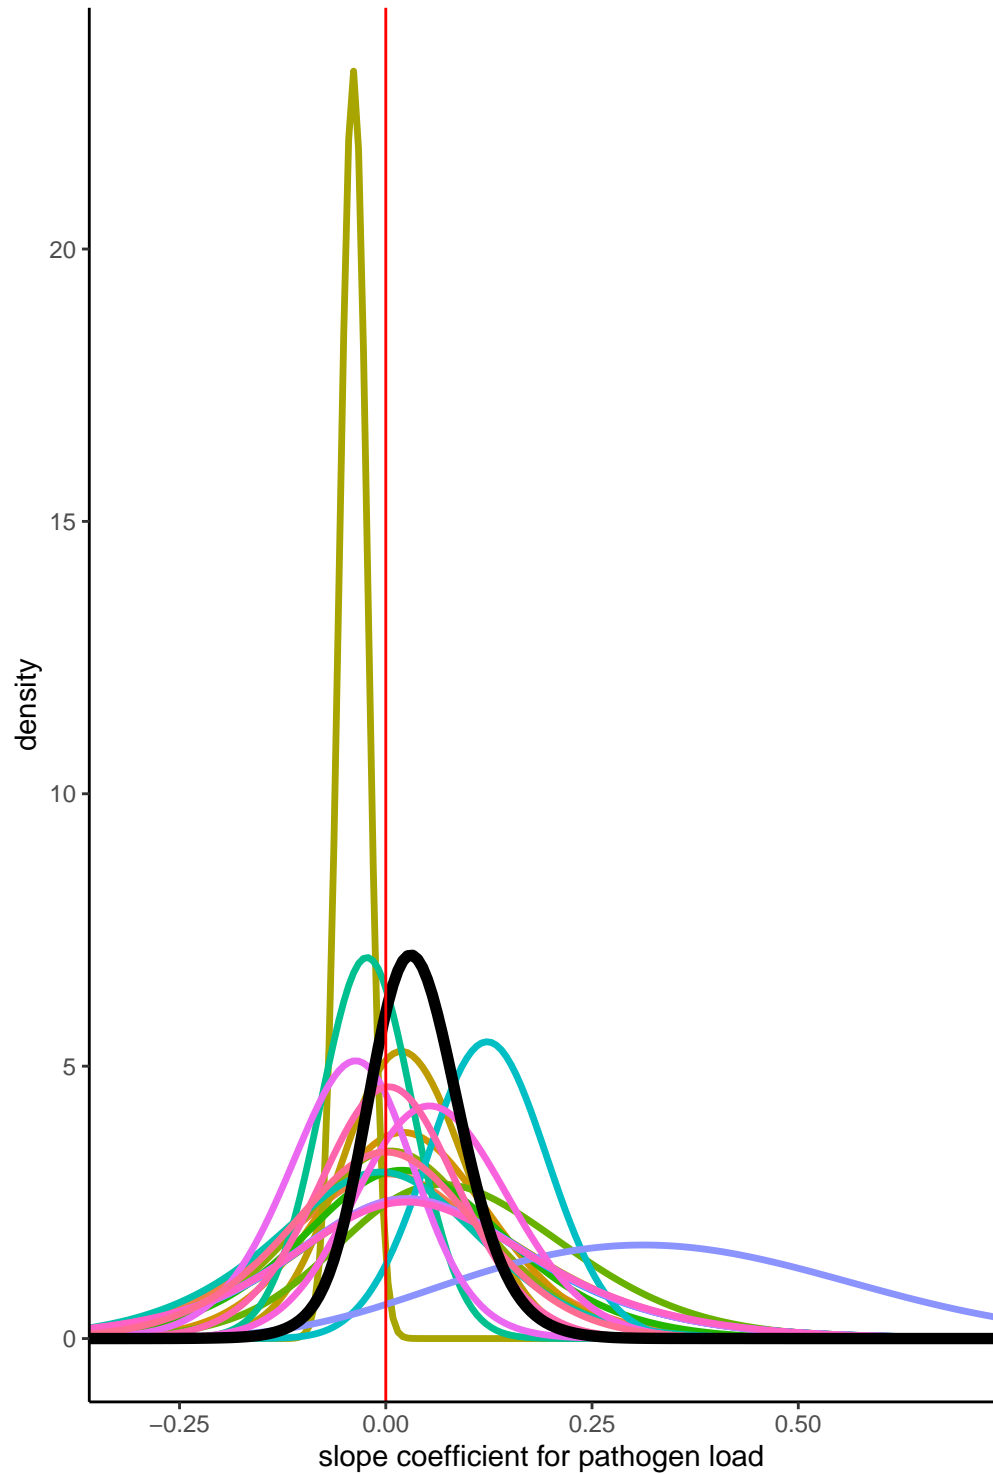

*Ichthyophthirius multifiliis* FaWi

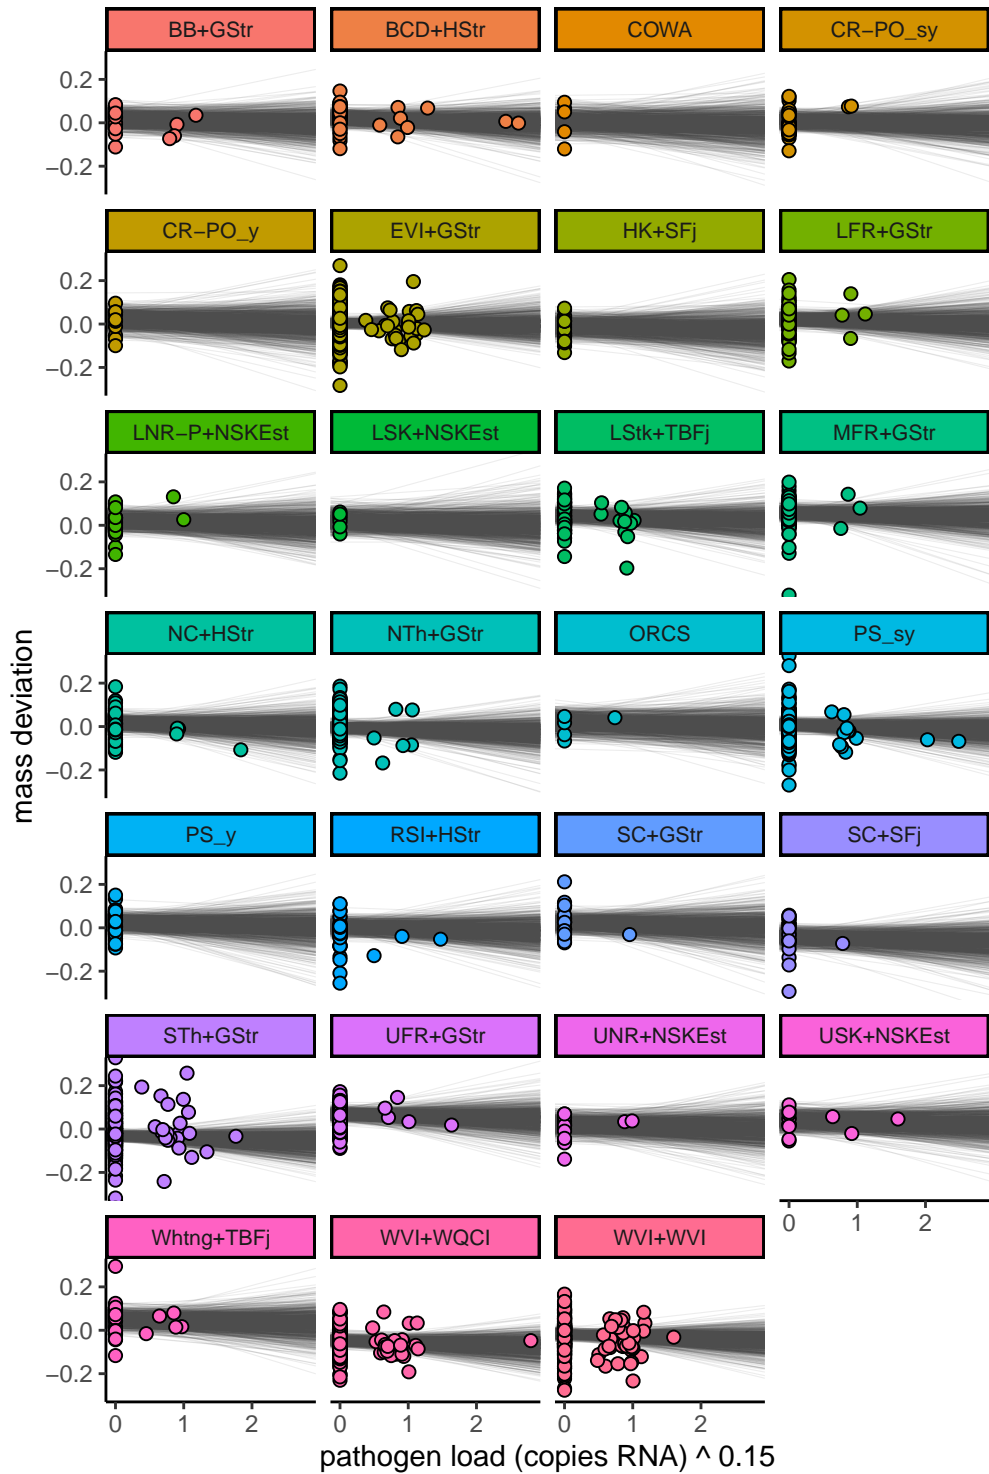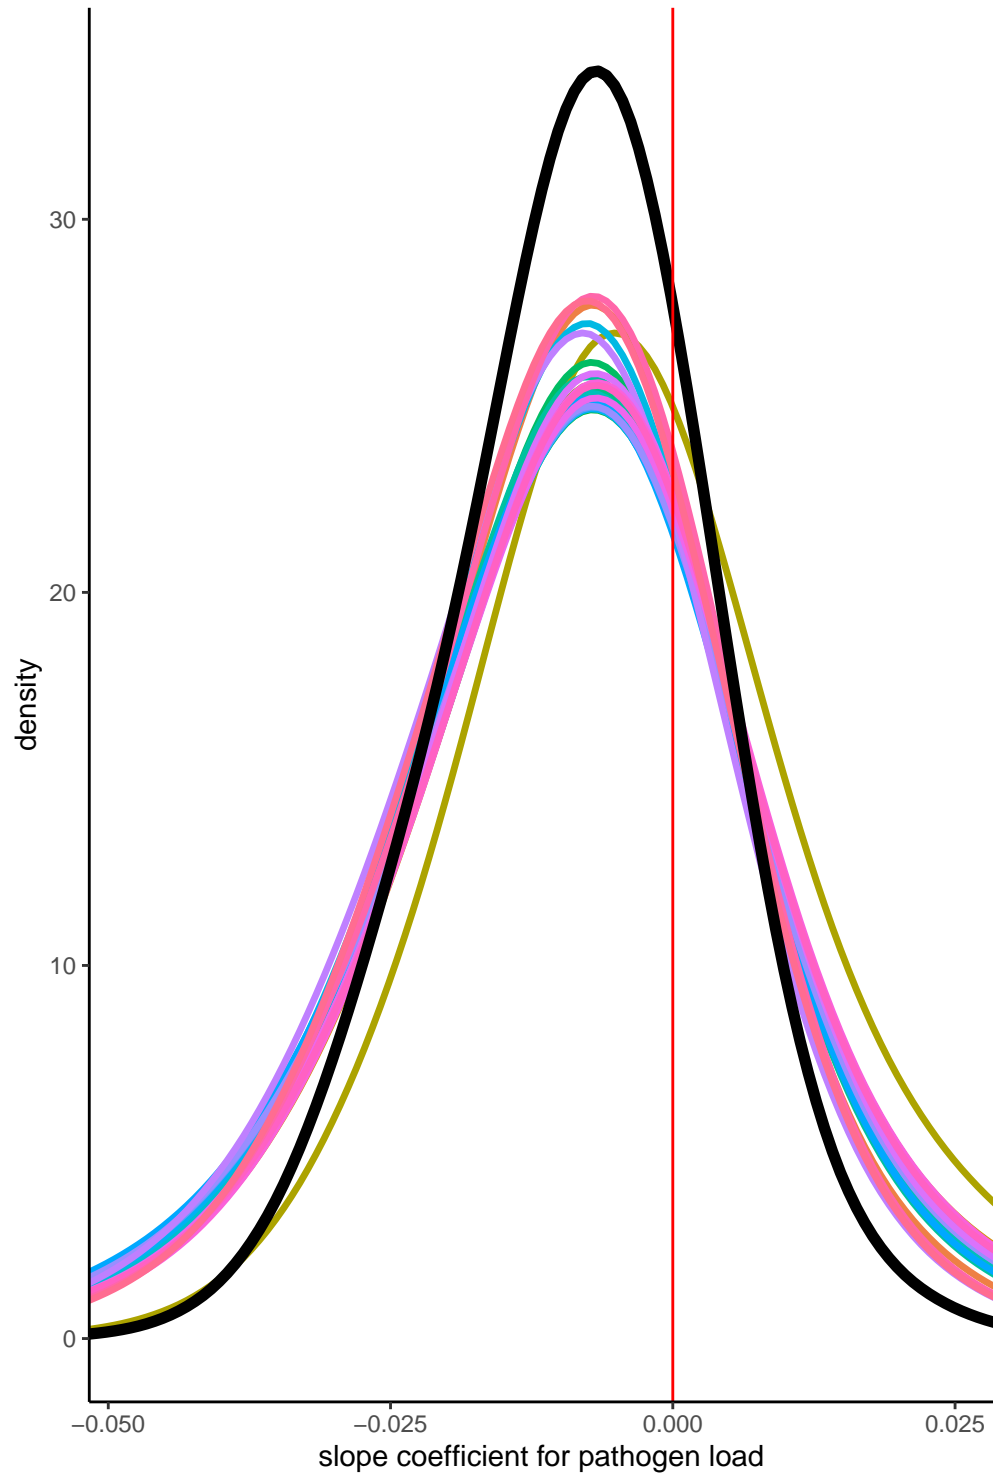



Kudoa thyrsites SpSu

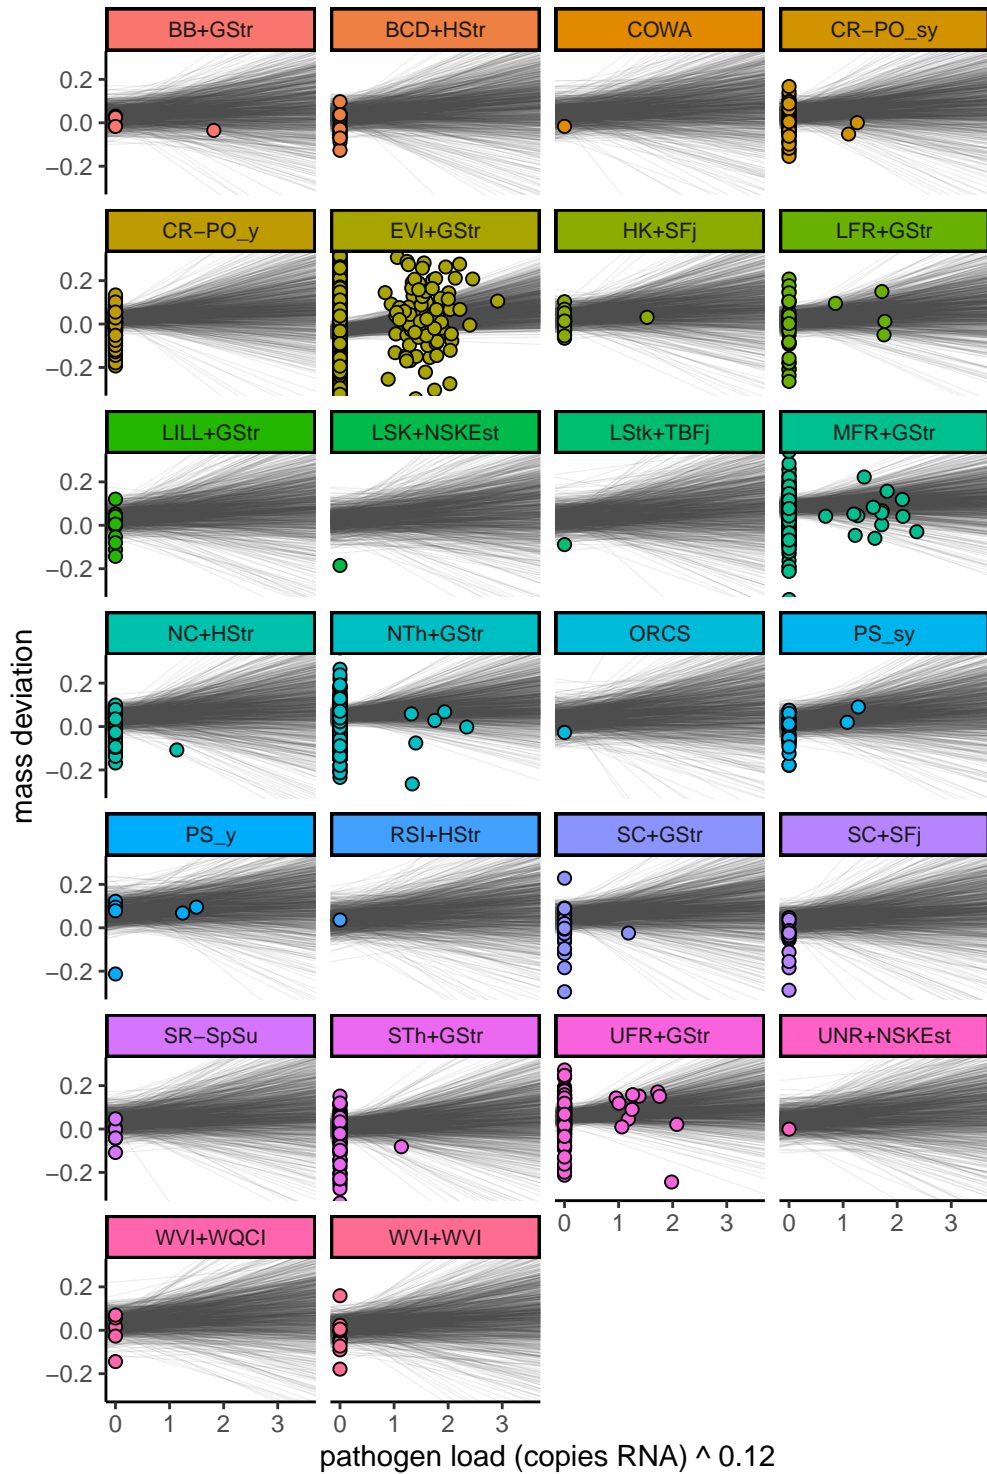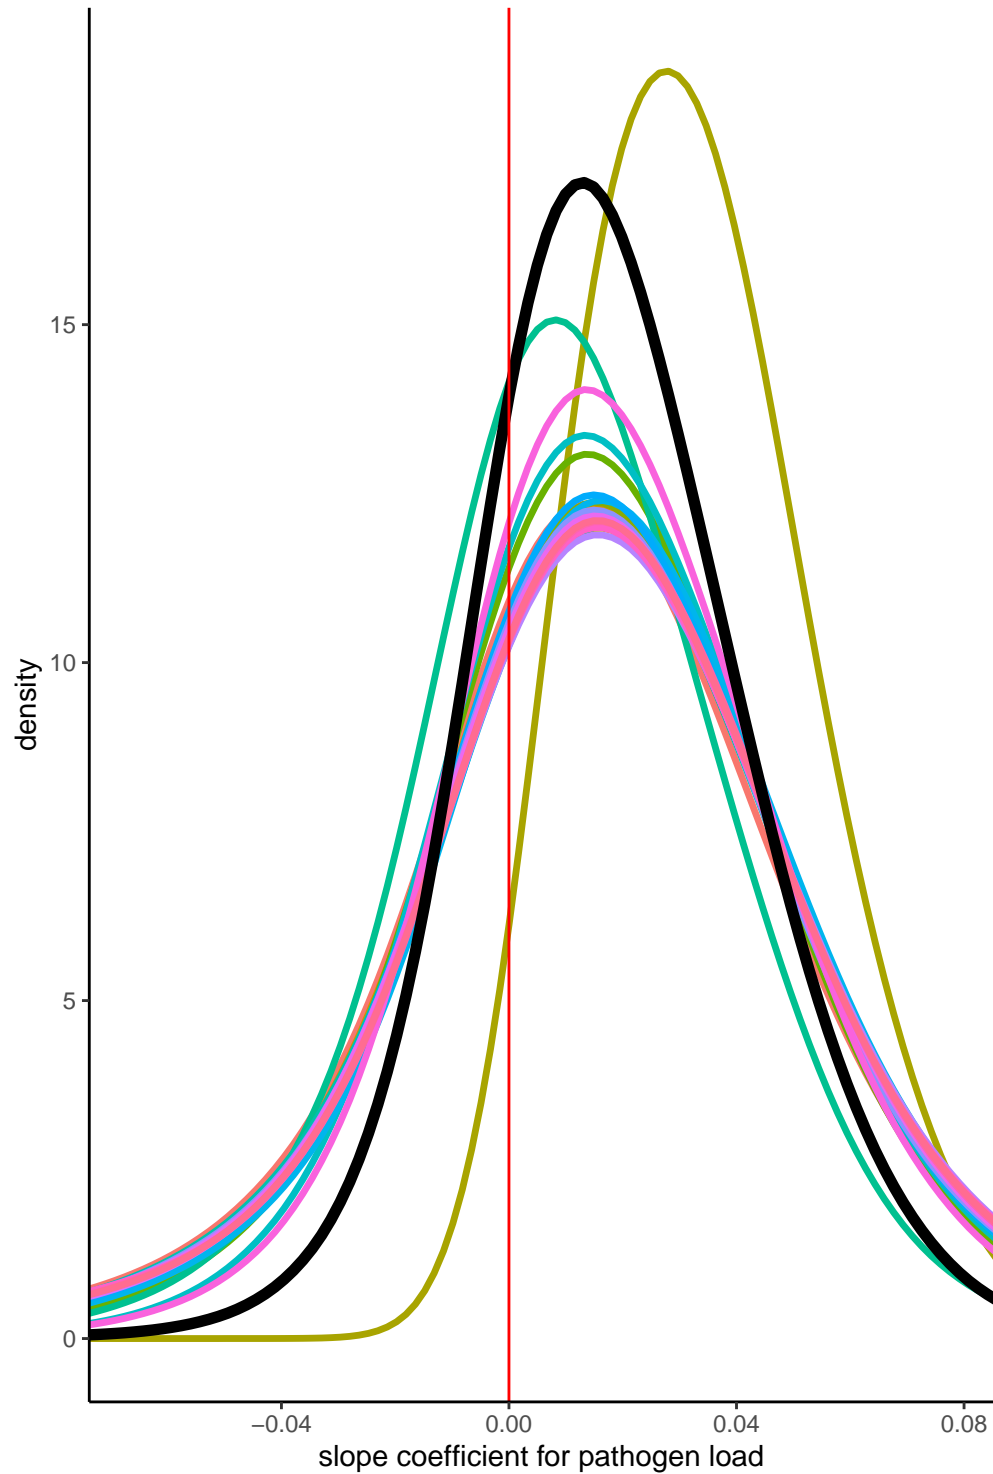

Kudoa thyrsites FaWi

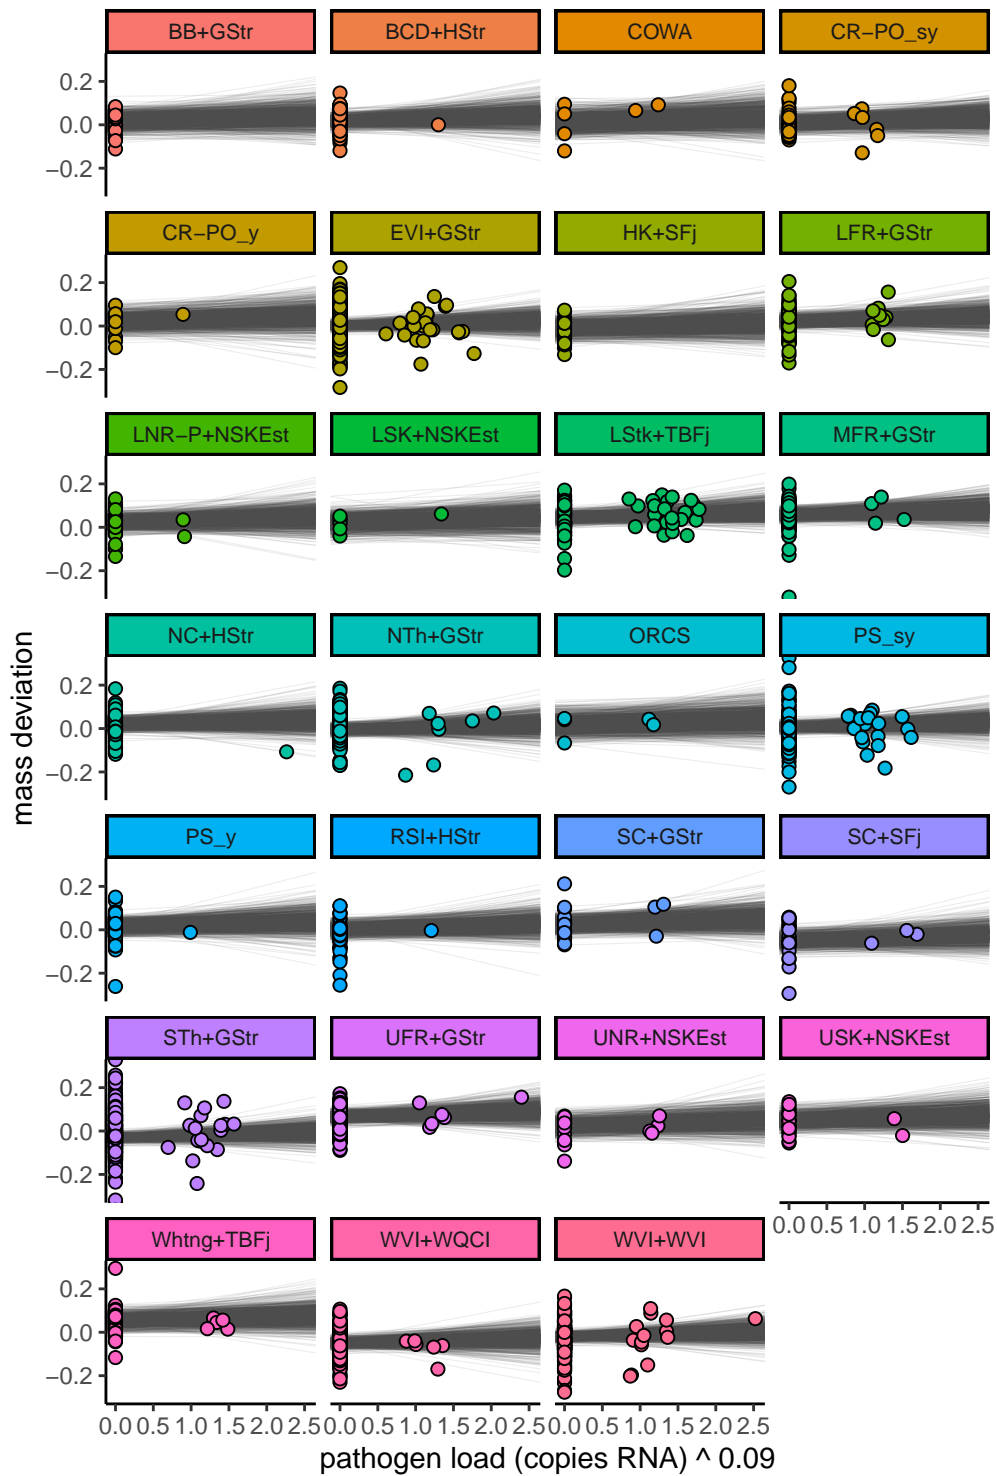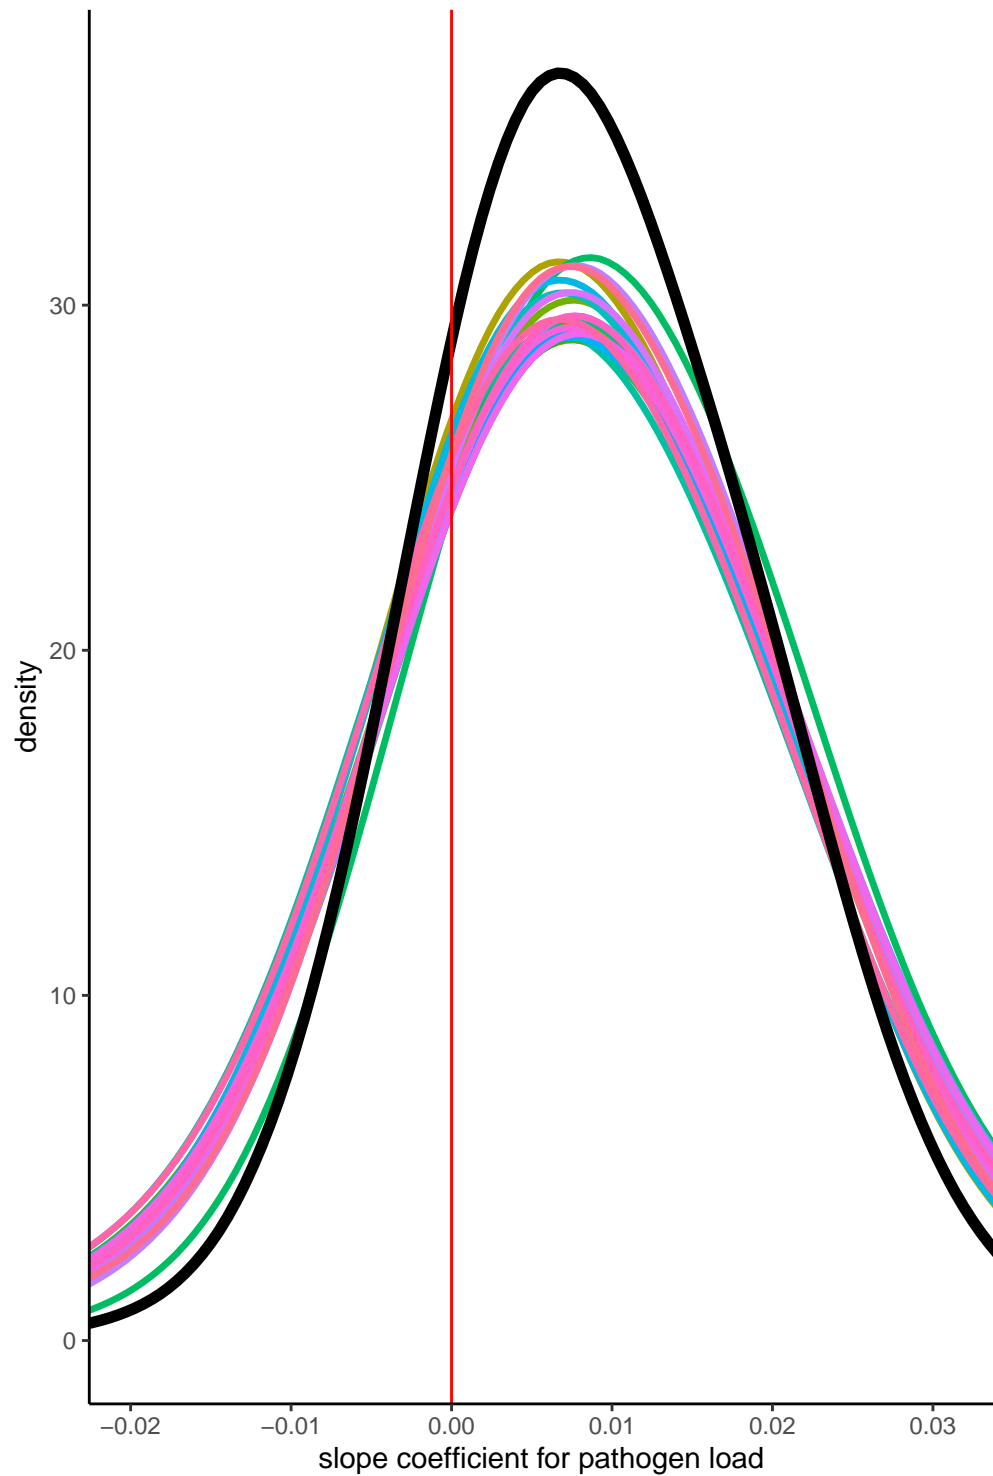

Loma salmonae SpSu

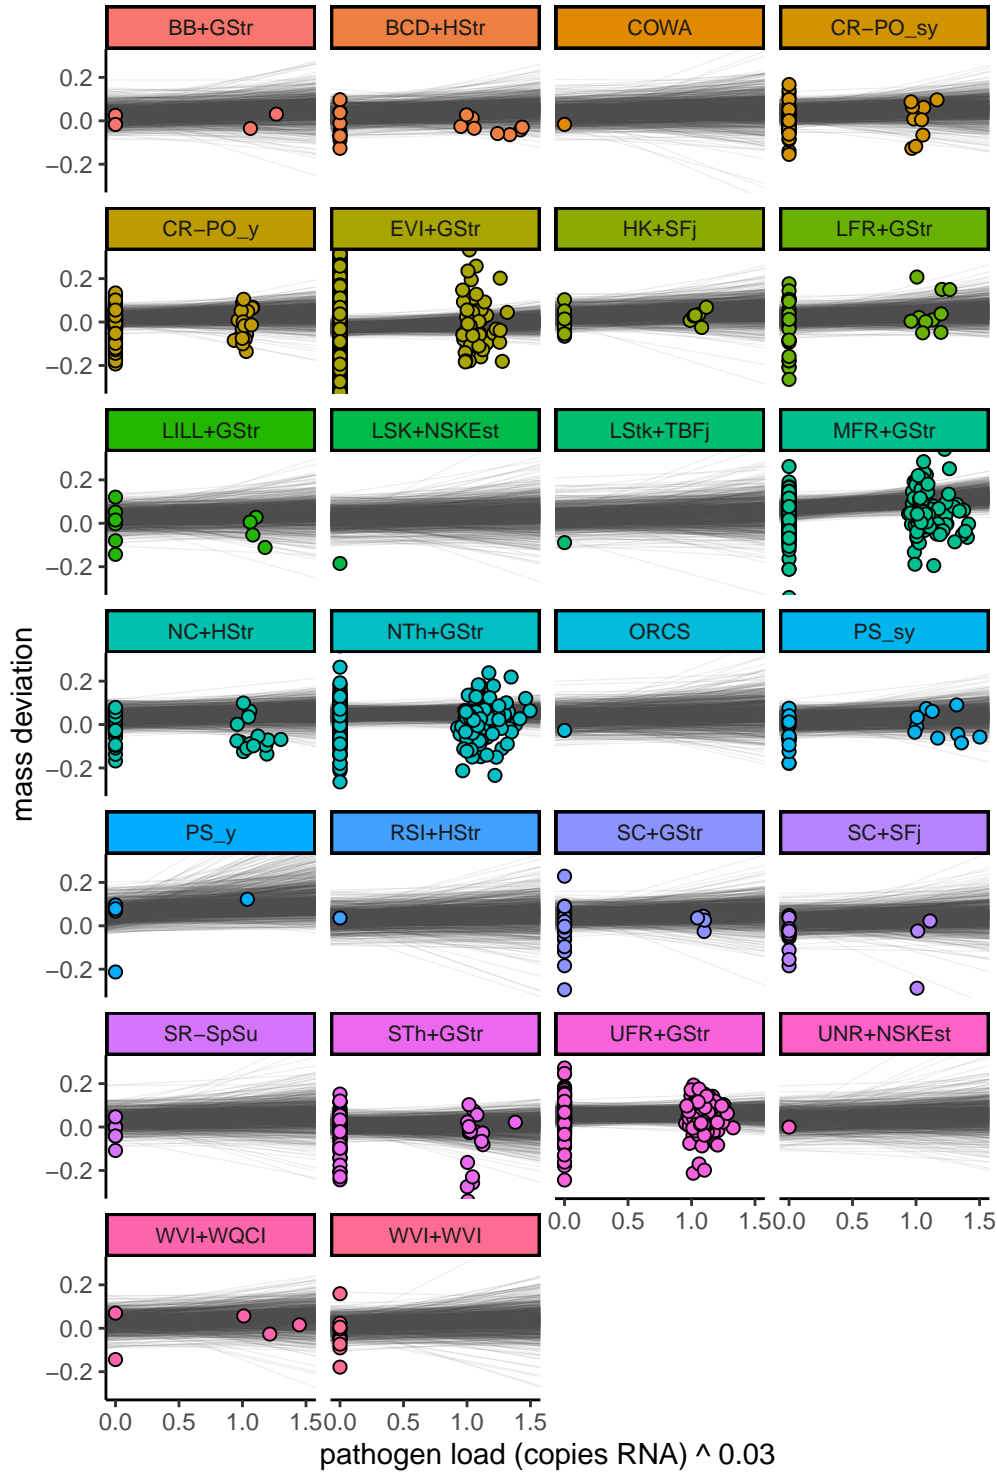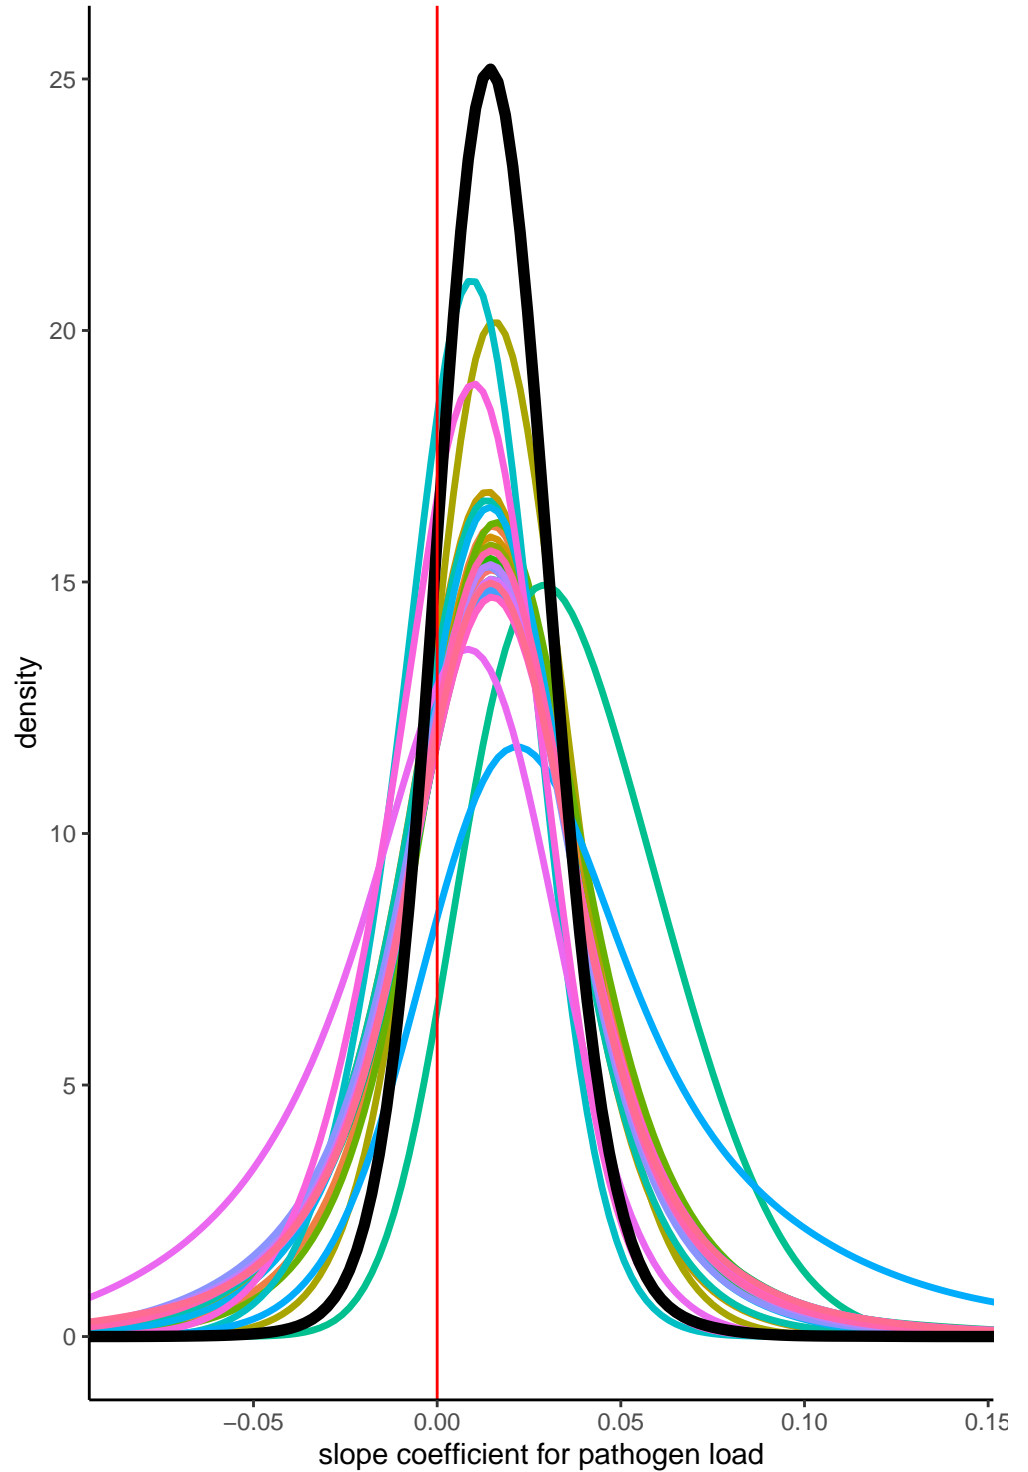

Loma salmonae FaWi

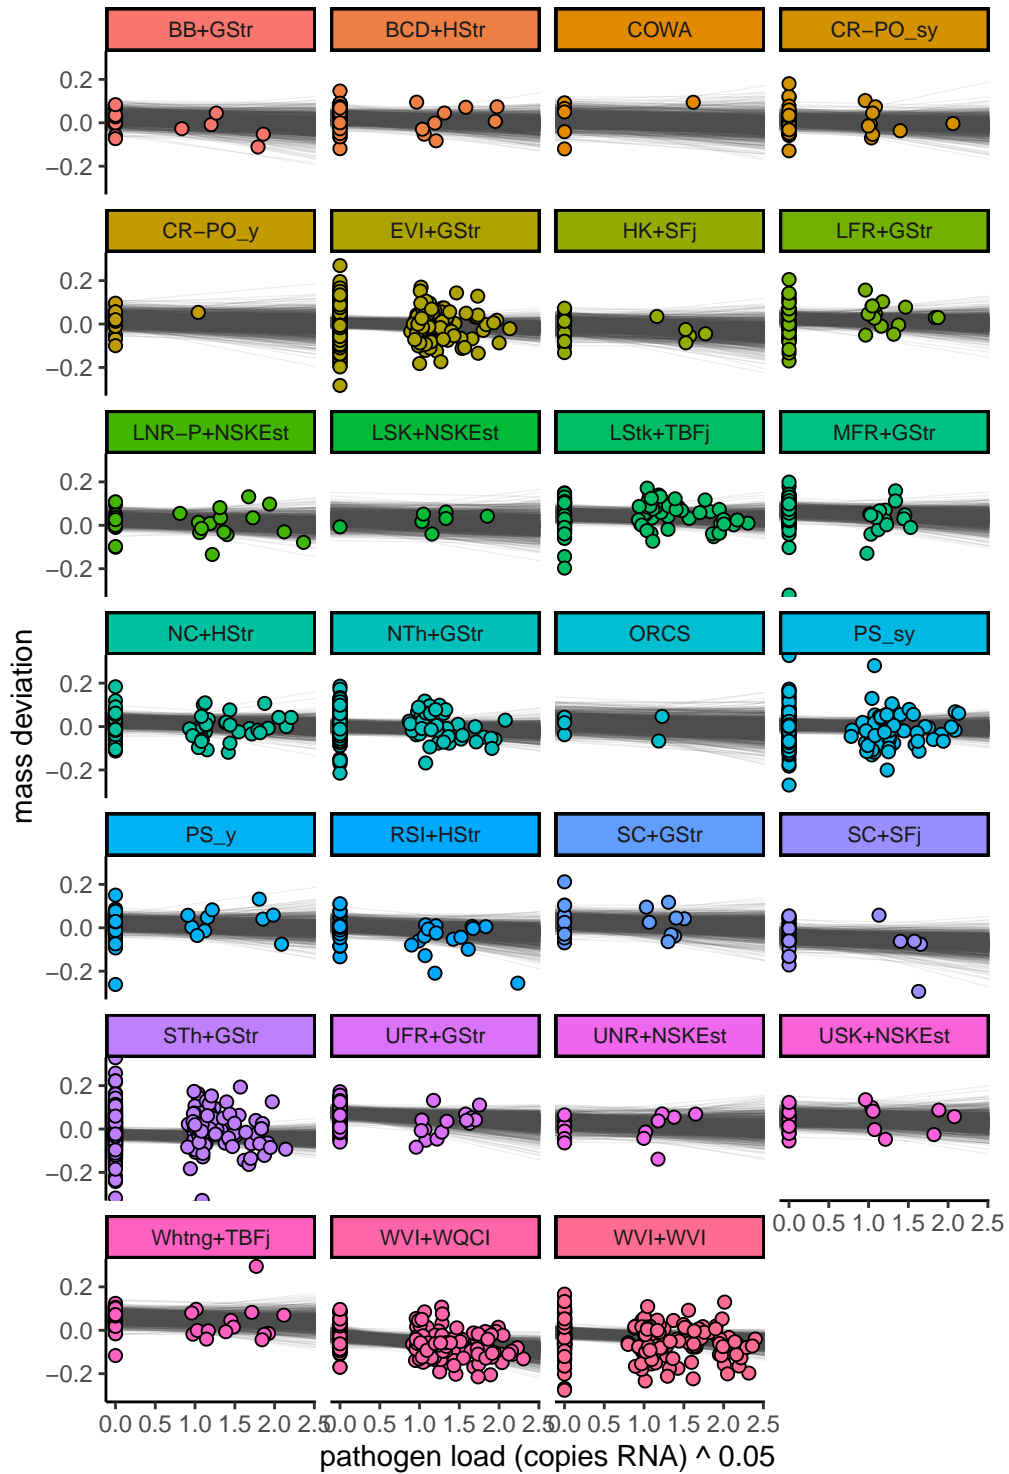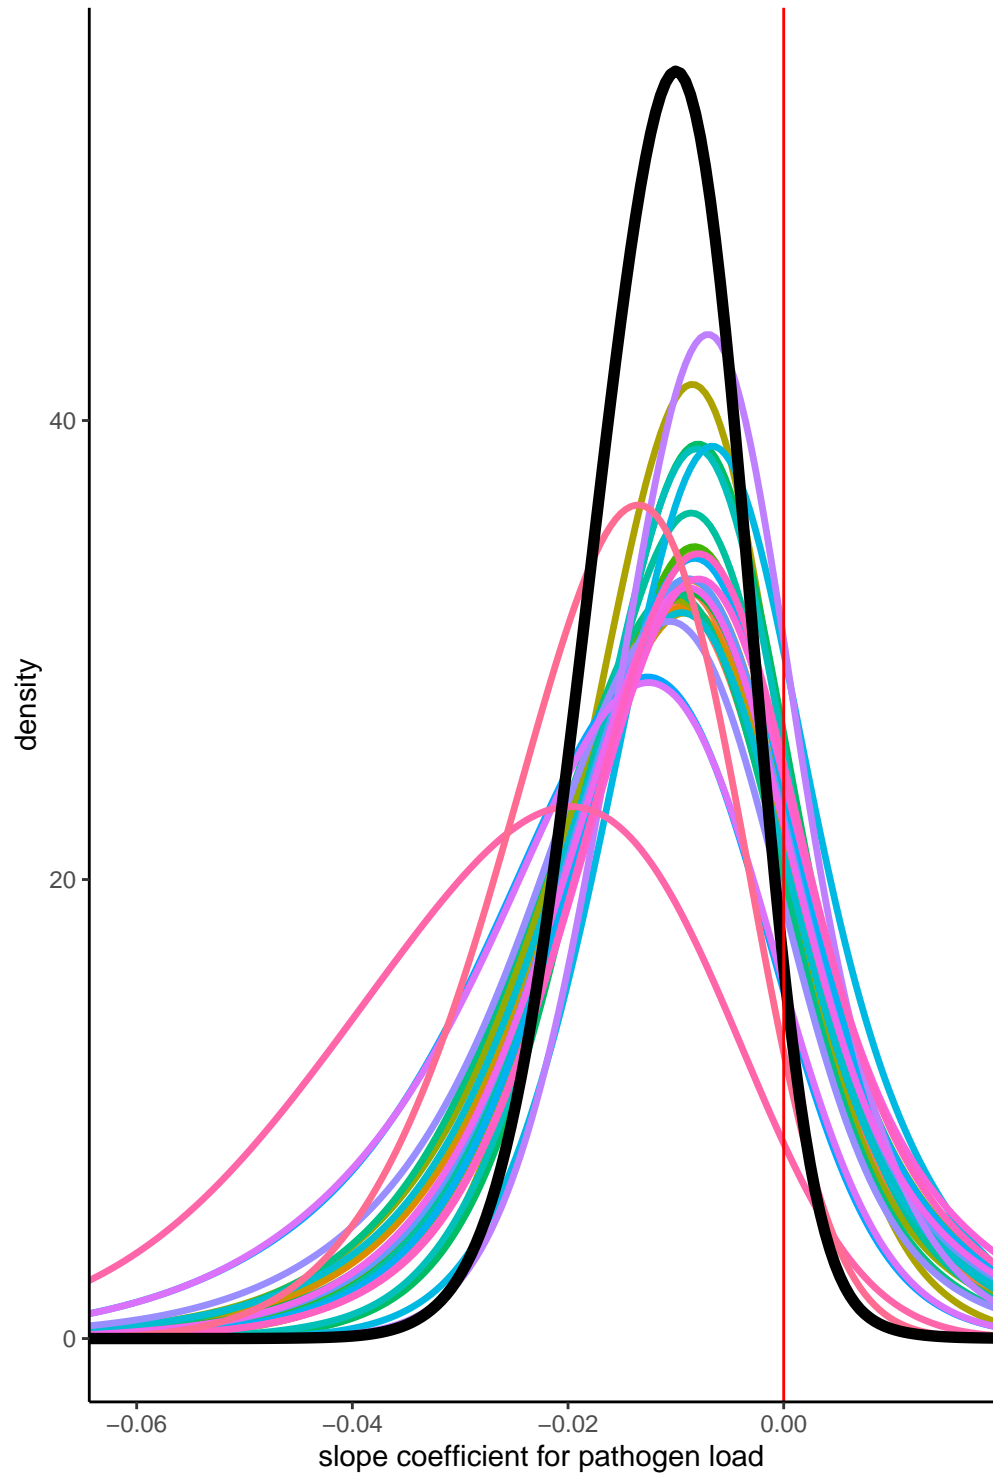

Myxobolus arcticus SpSu

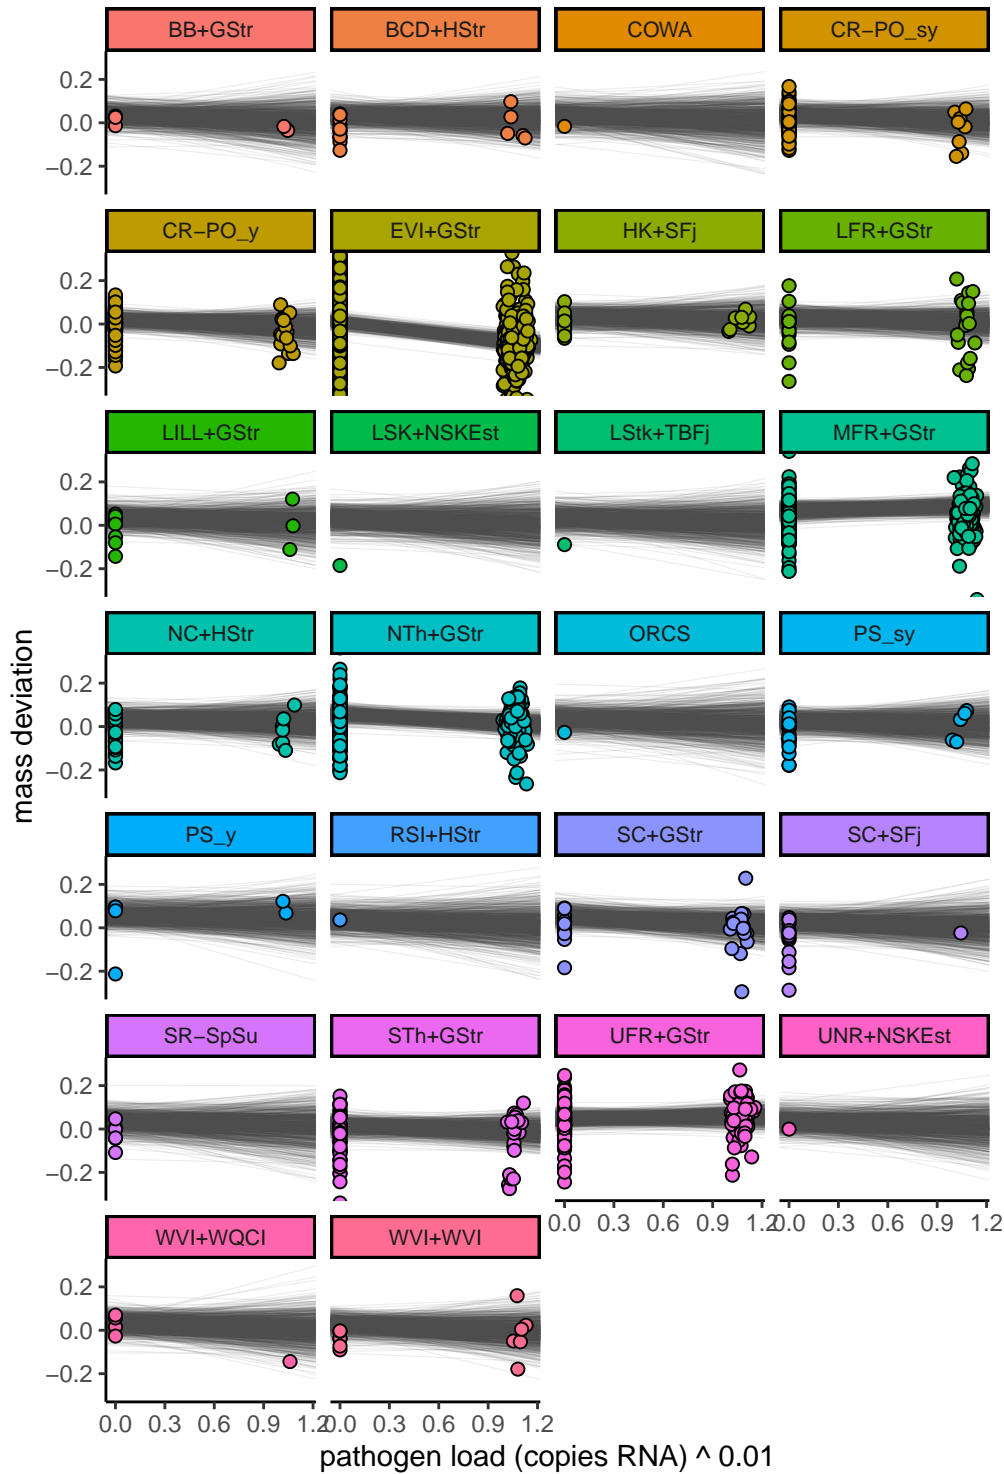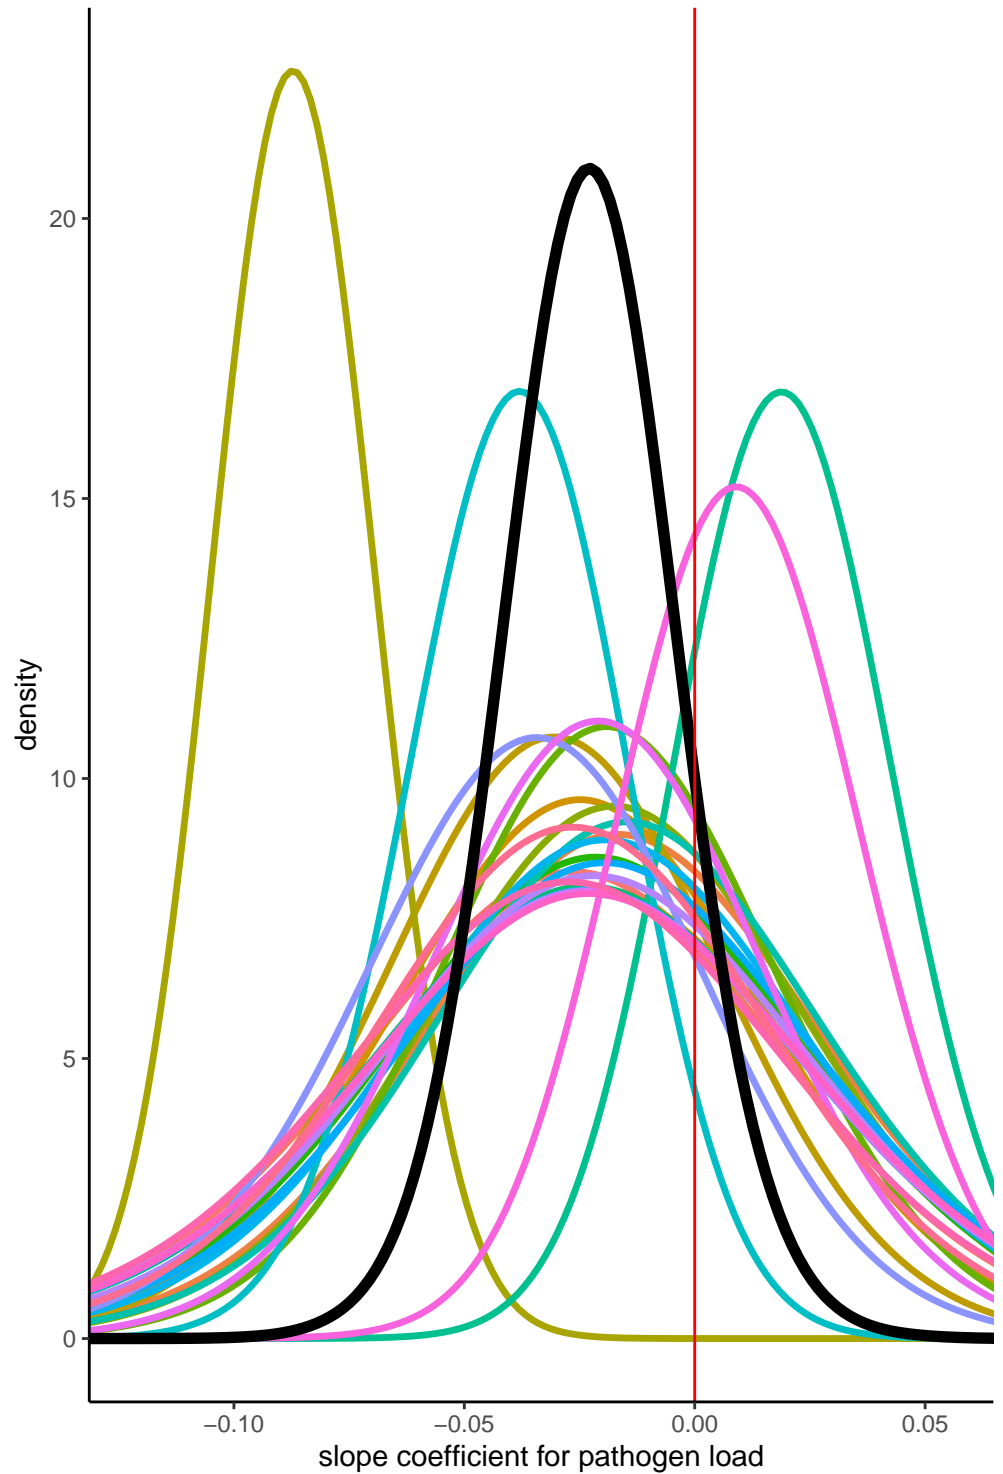

Myxobolus arcticus FaWi

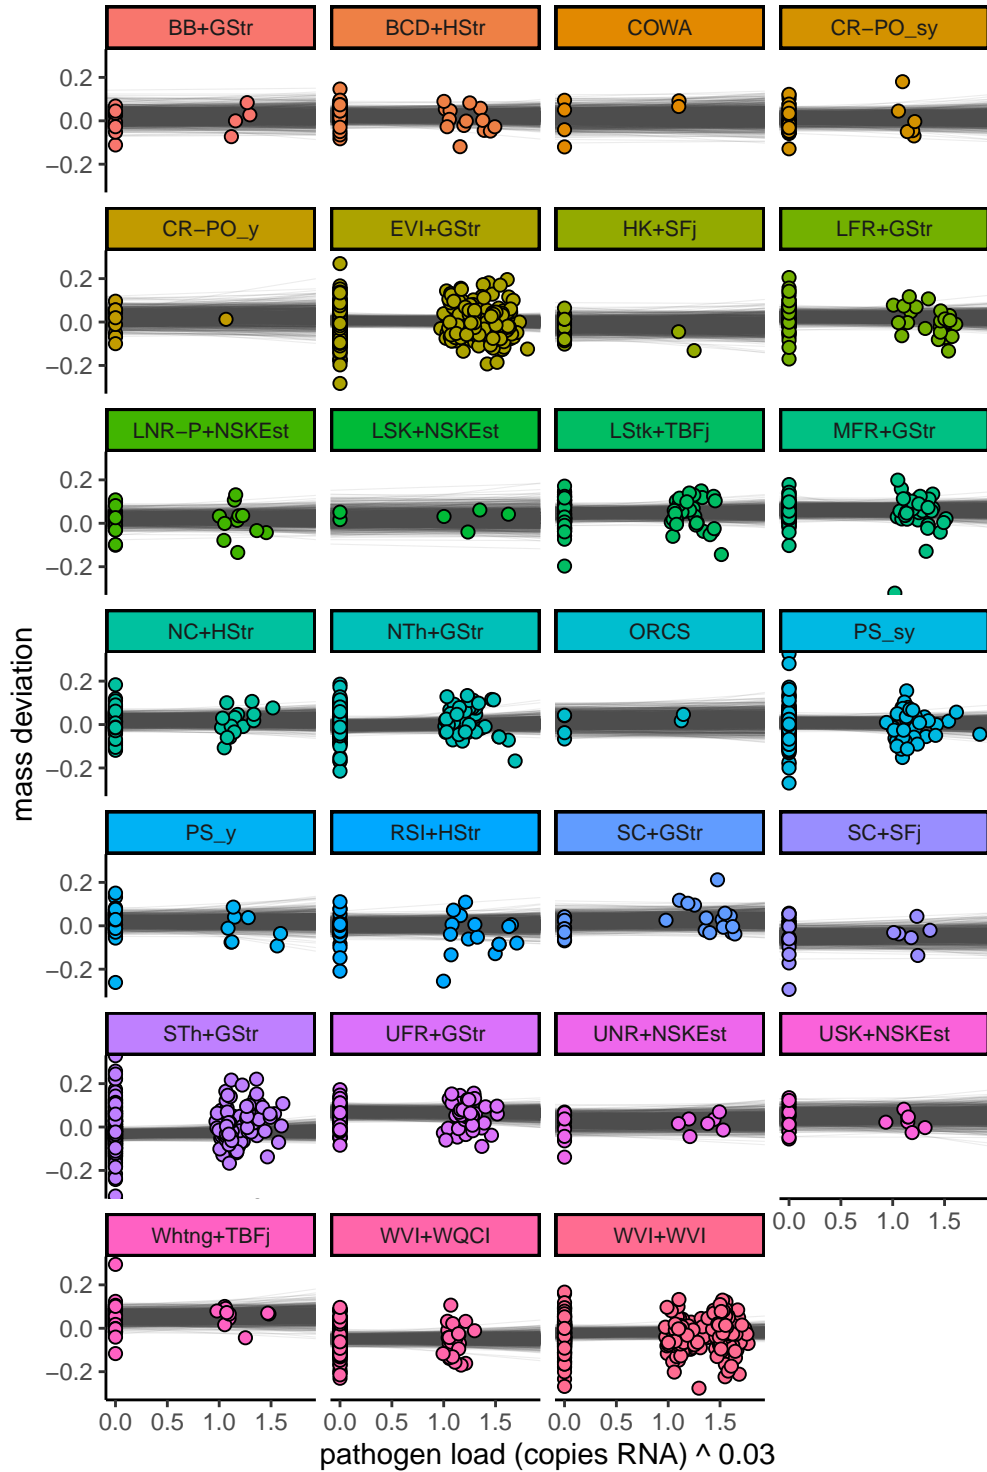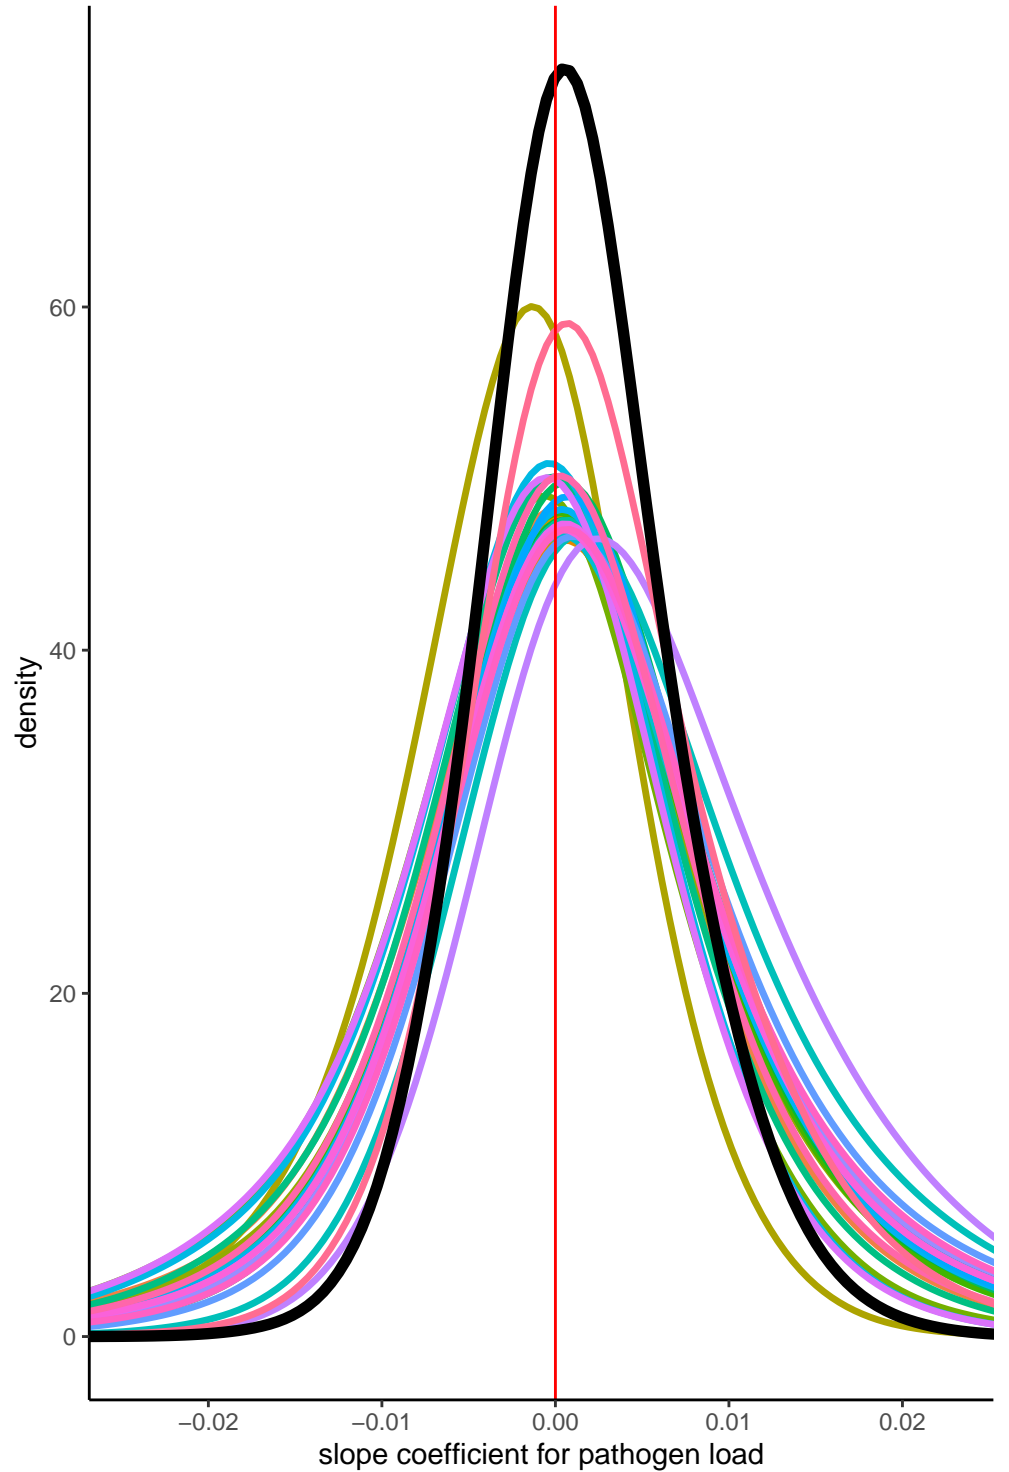

Myxobolus insidiosus SpSu

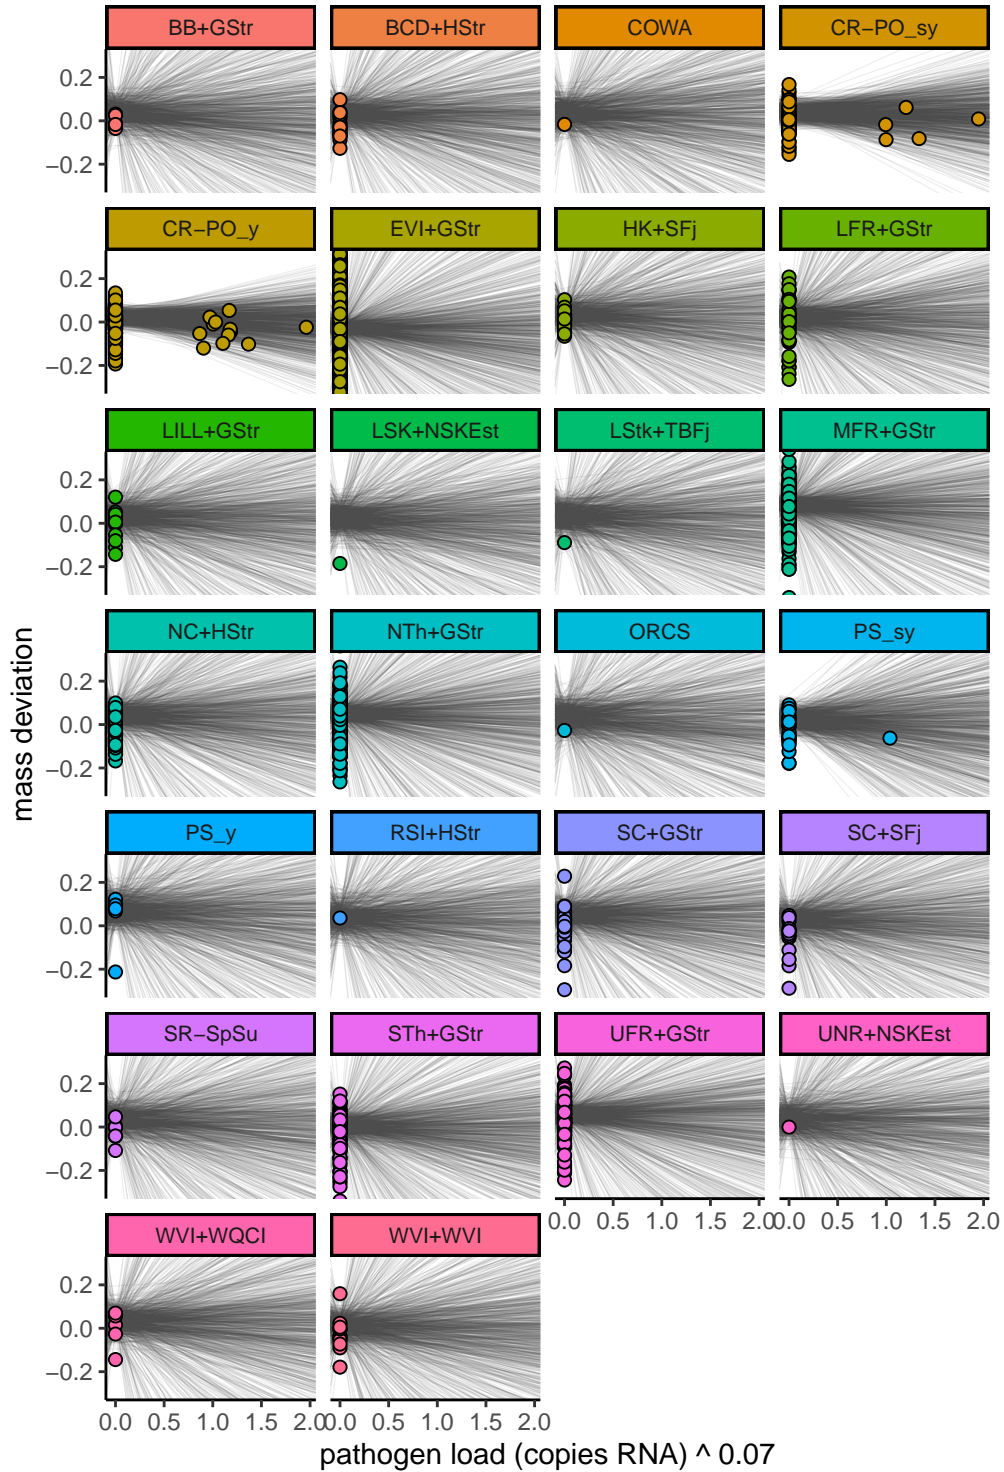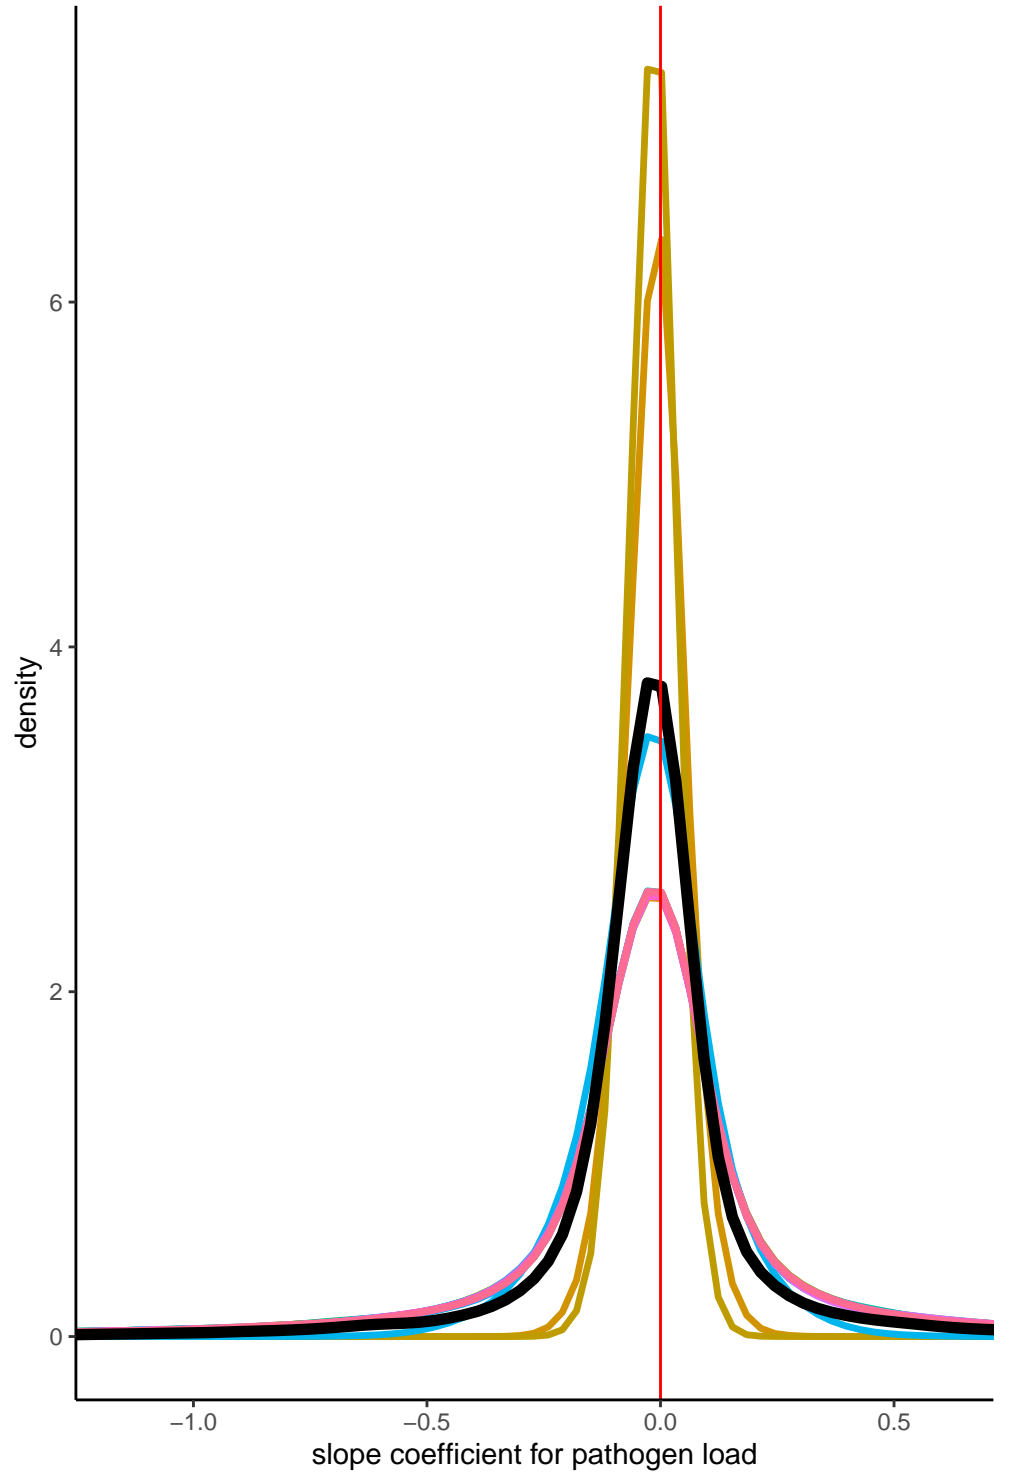

Nanophyetus salmincola SpSu

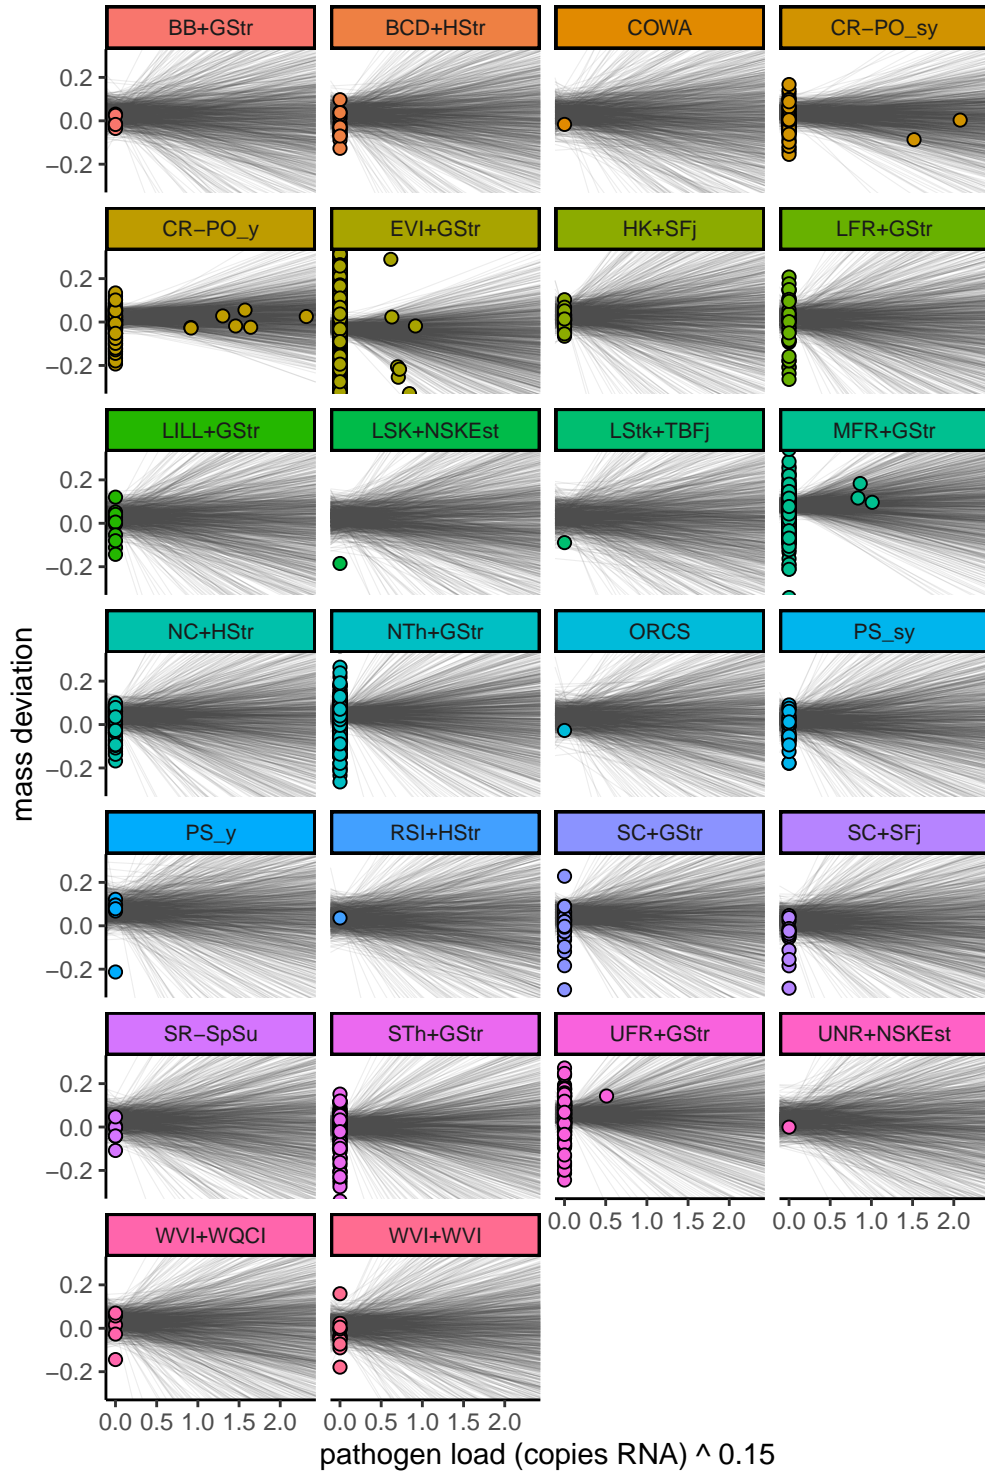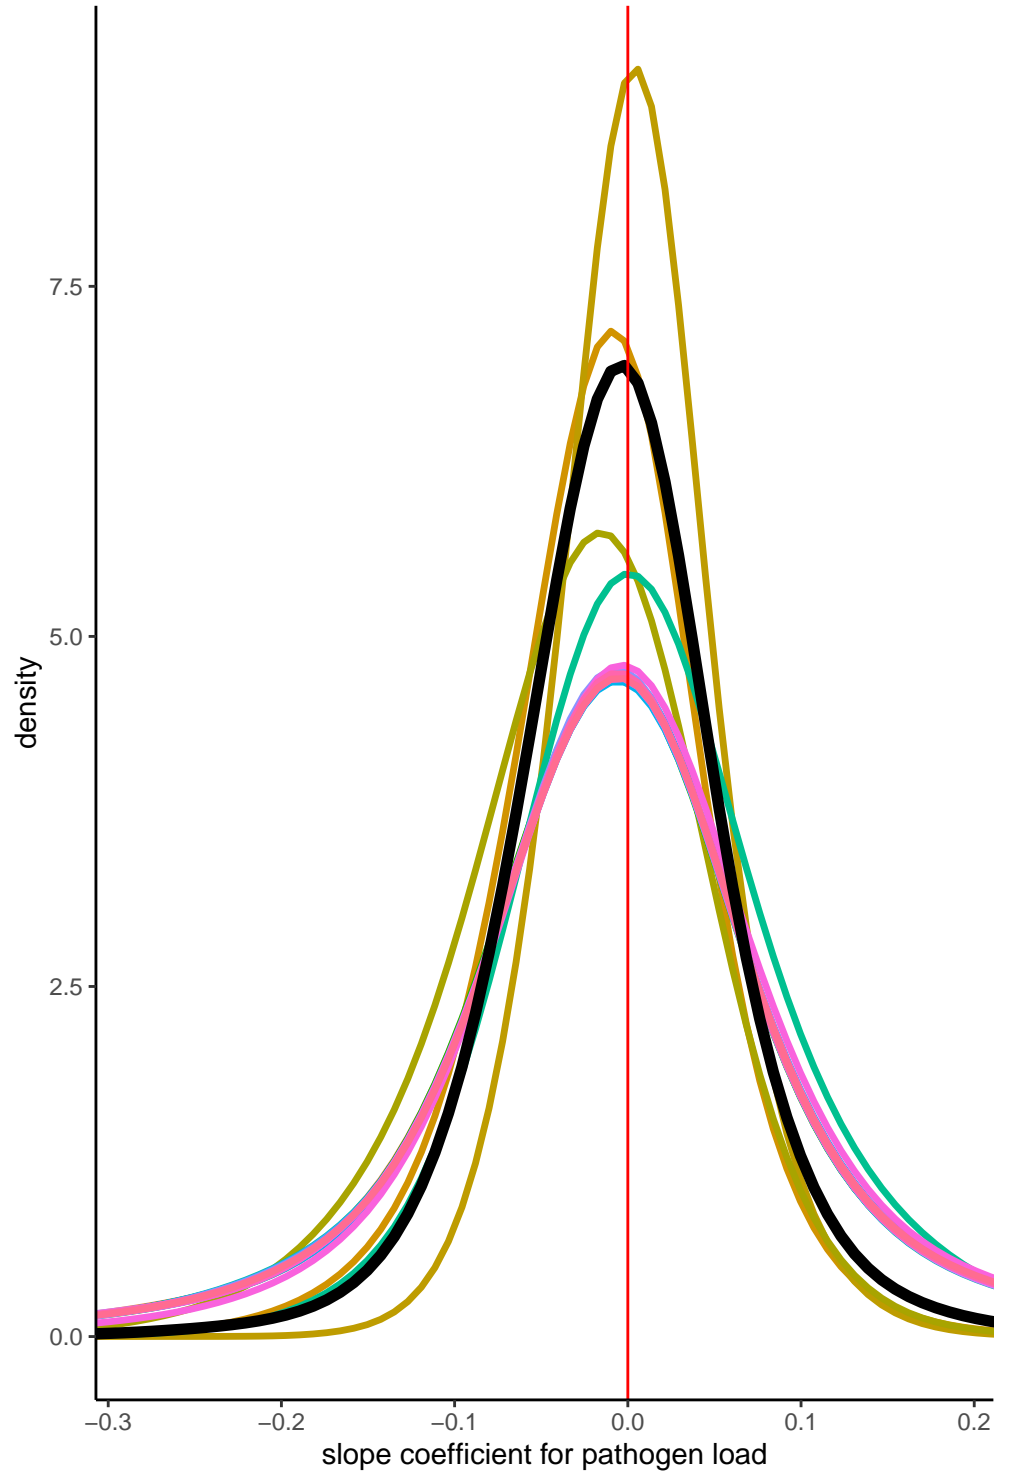



Nanophyetus salmincola FaWi

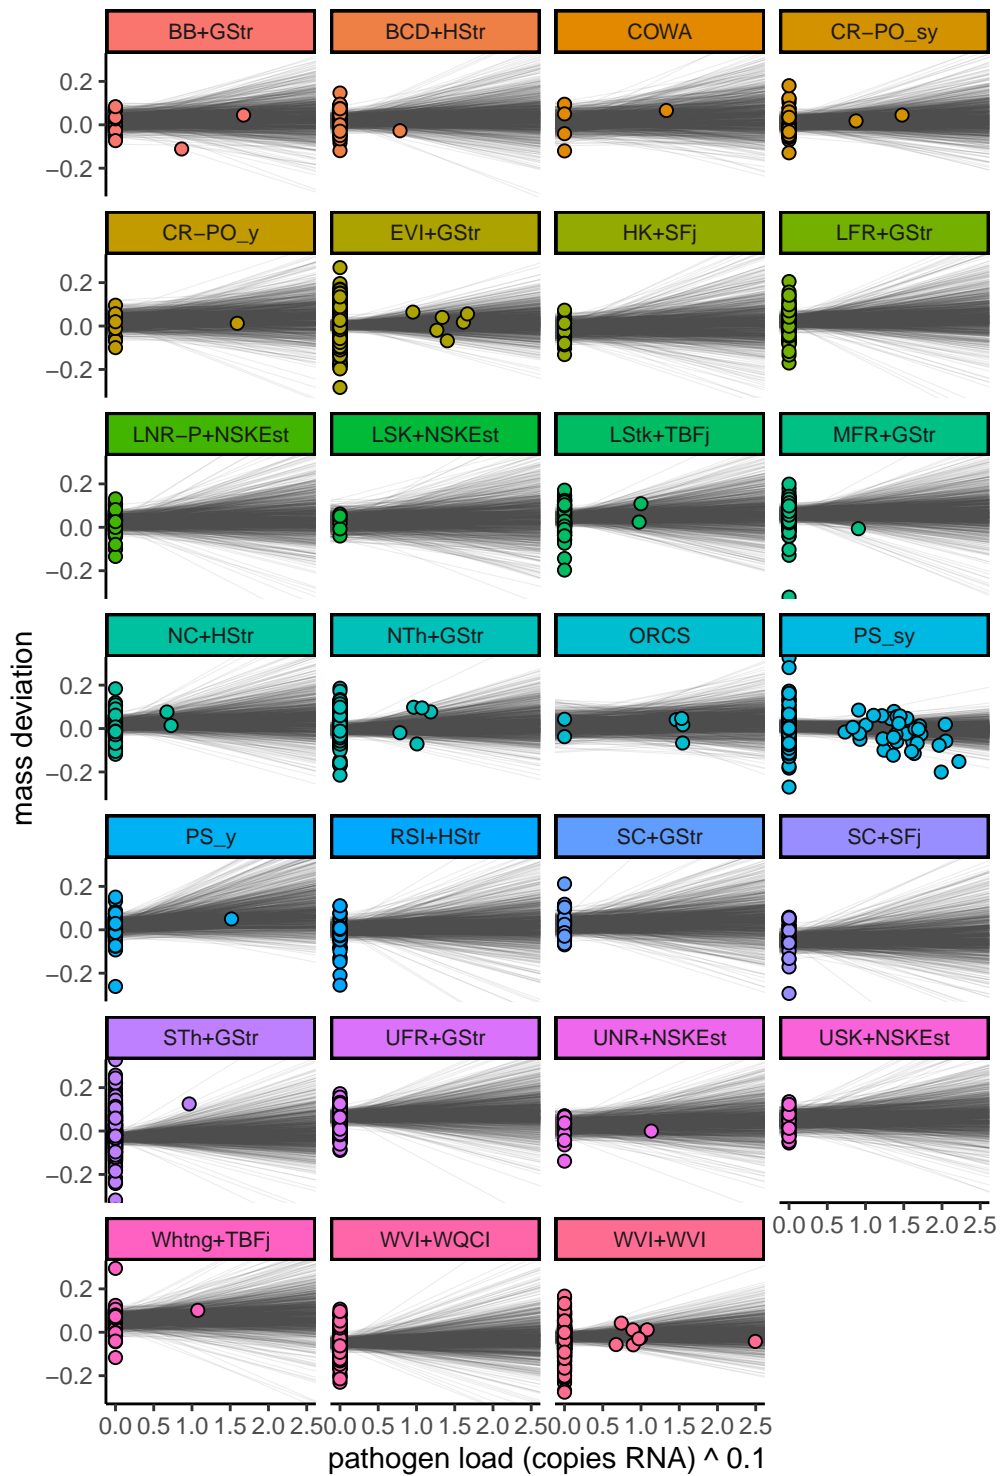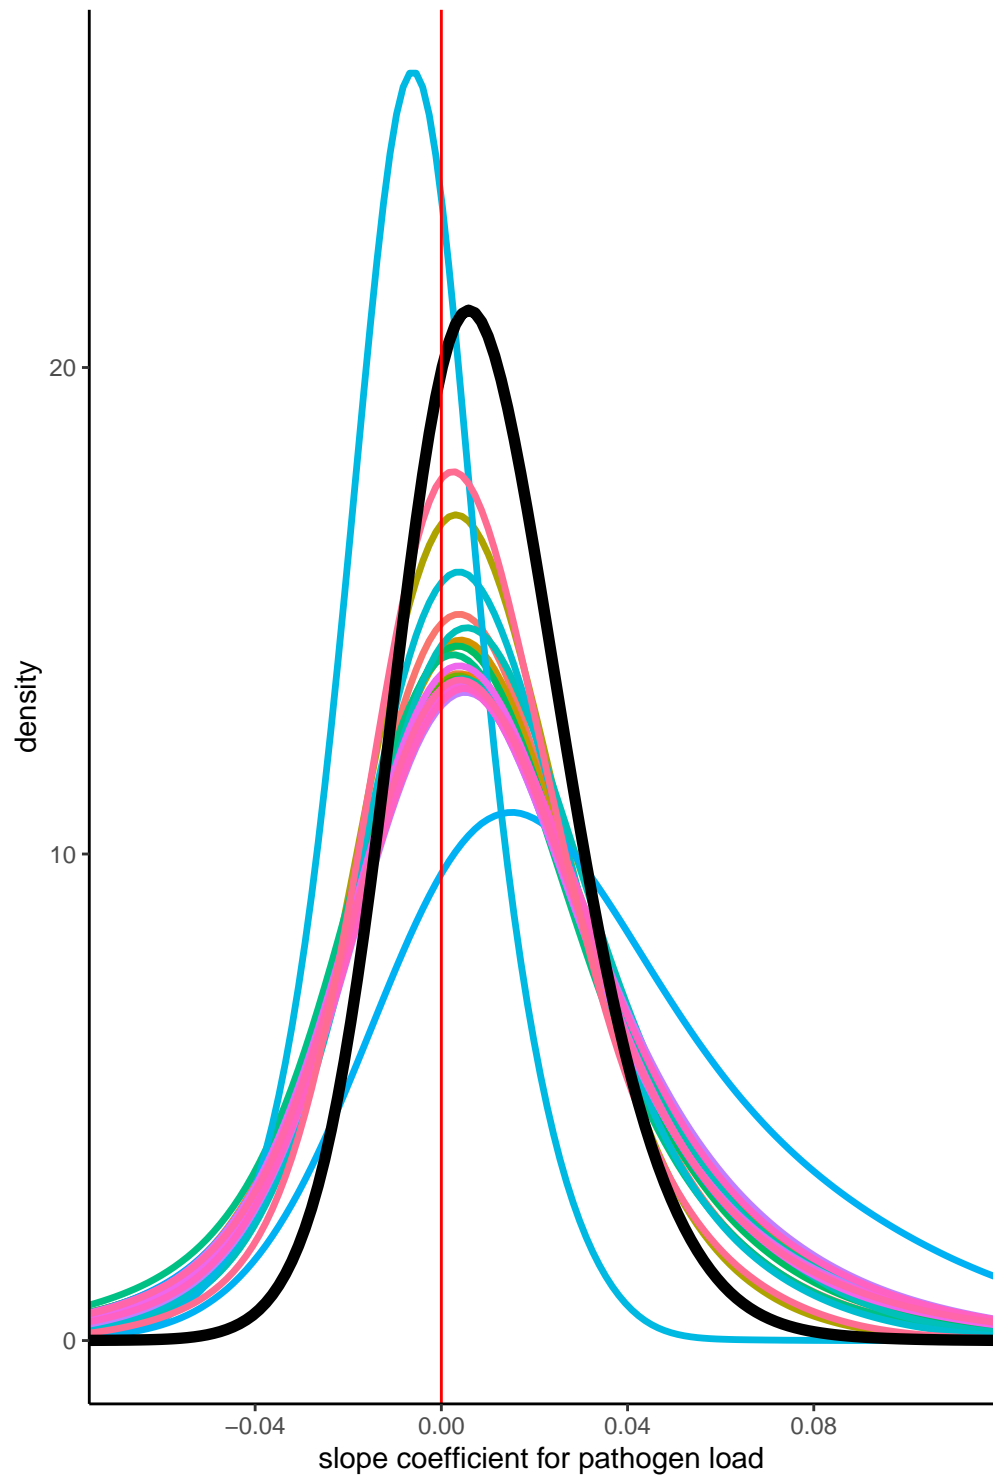

Parvicapsula kabatai SpSu

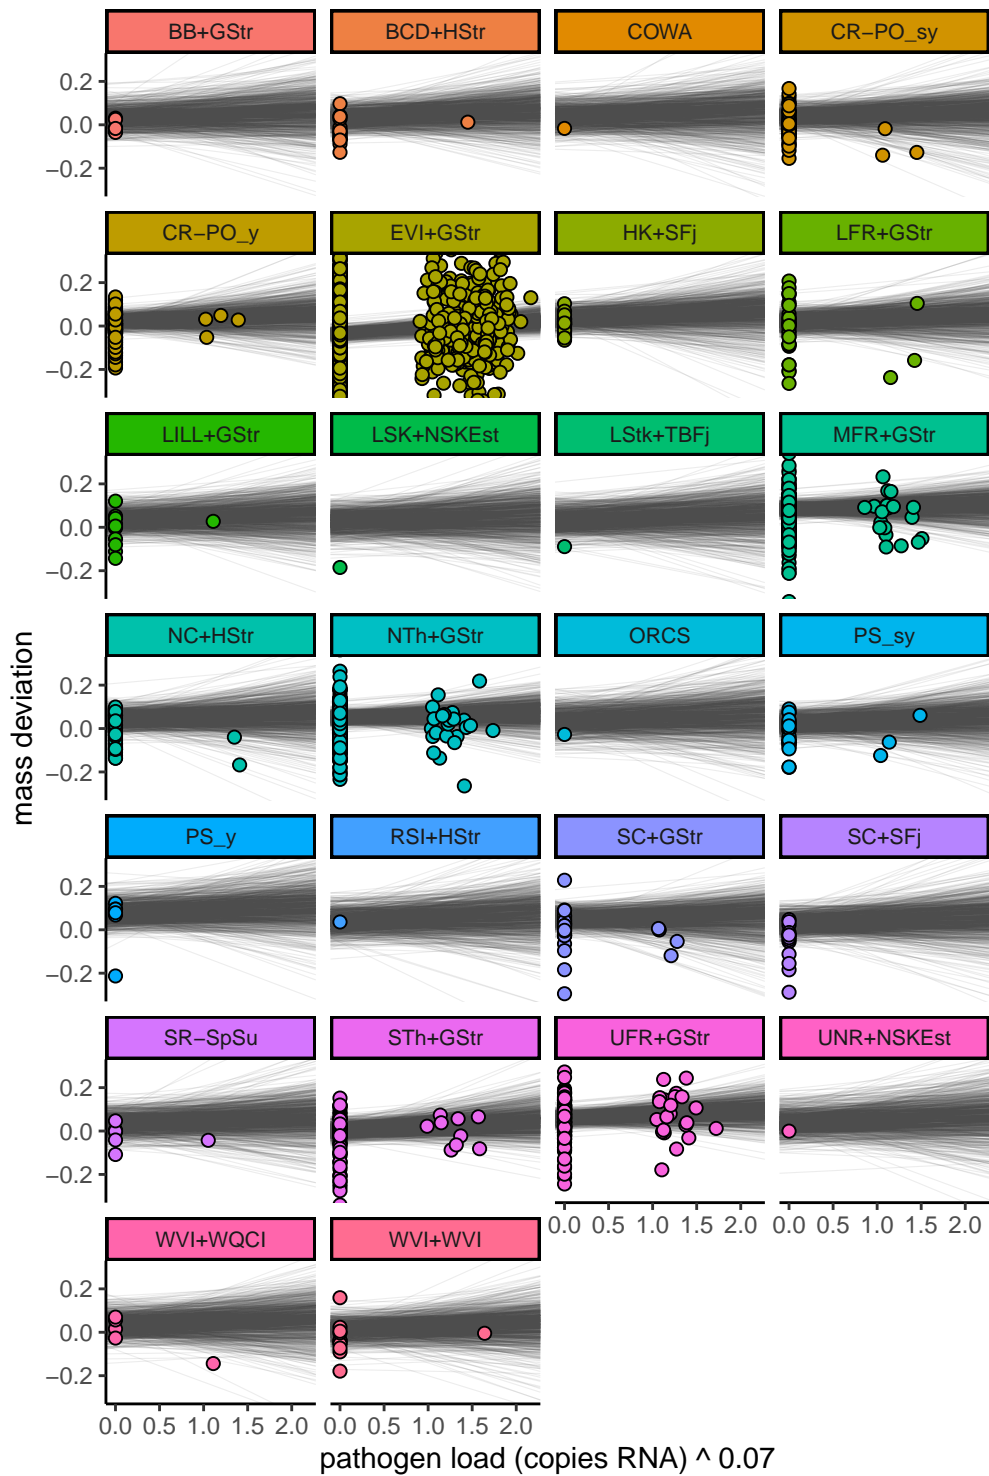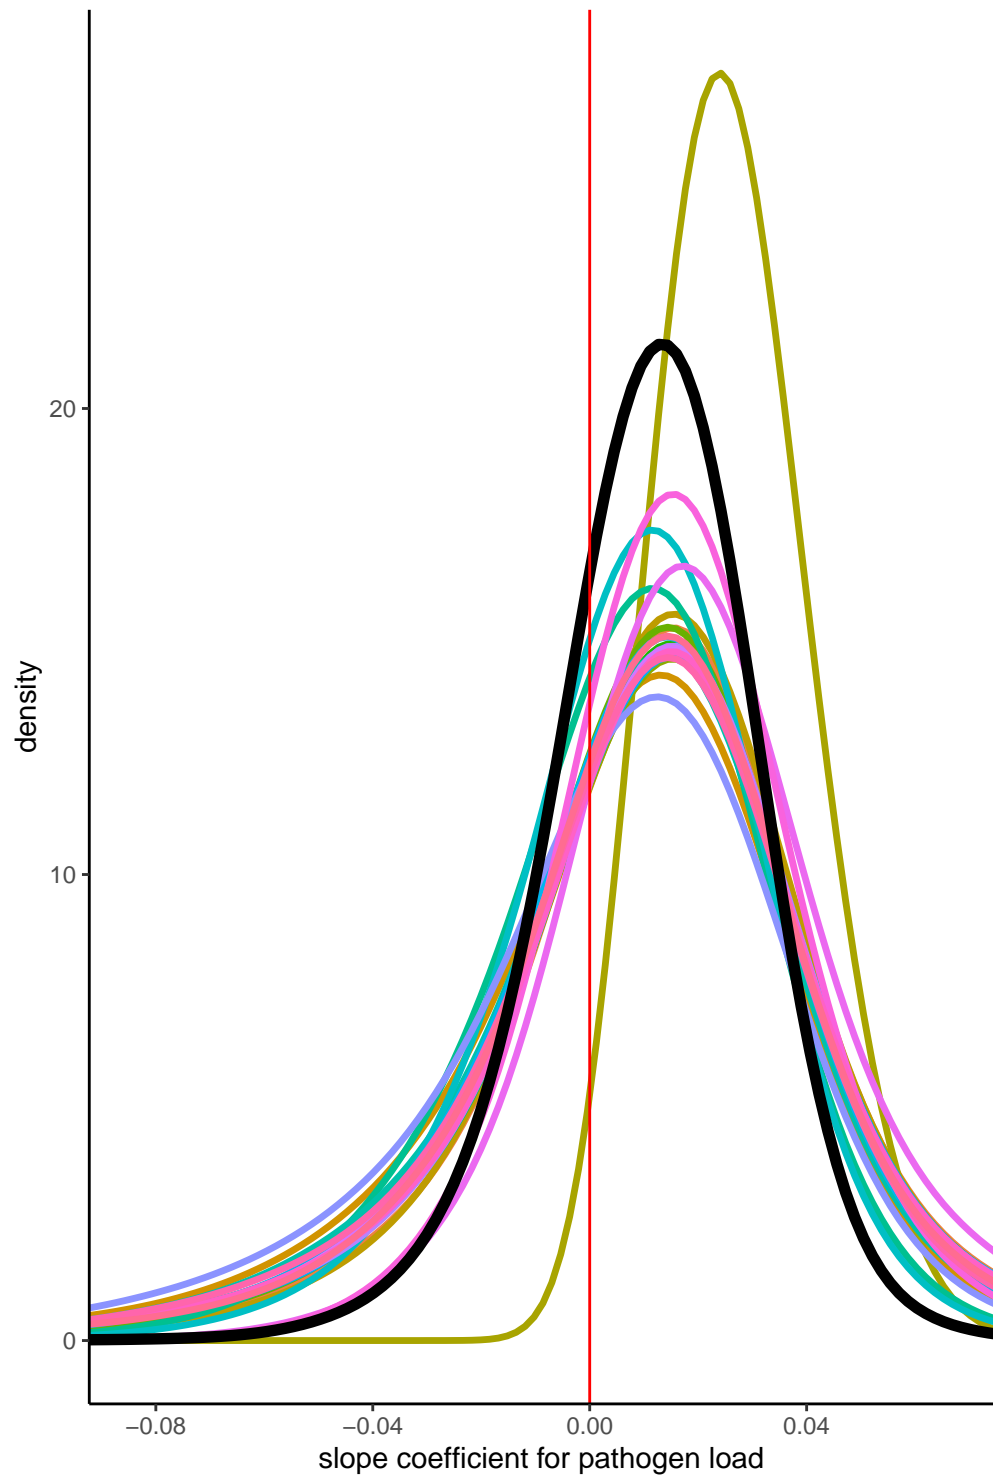

Parvicapsula kabatai FaWi

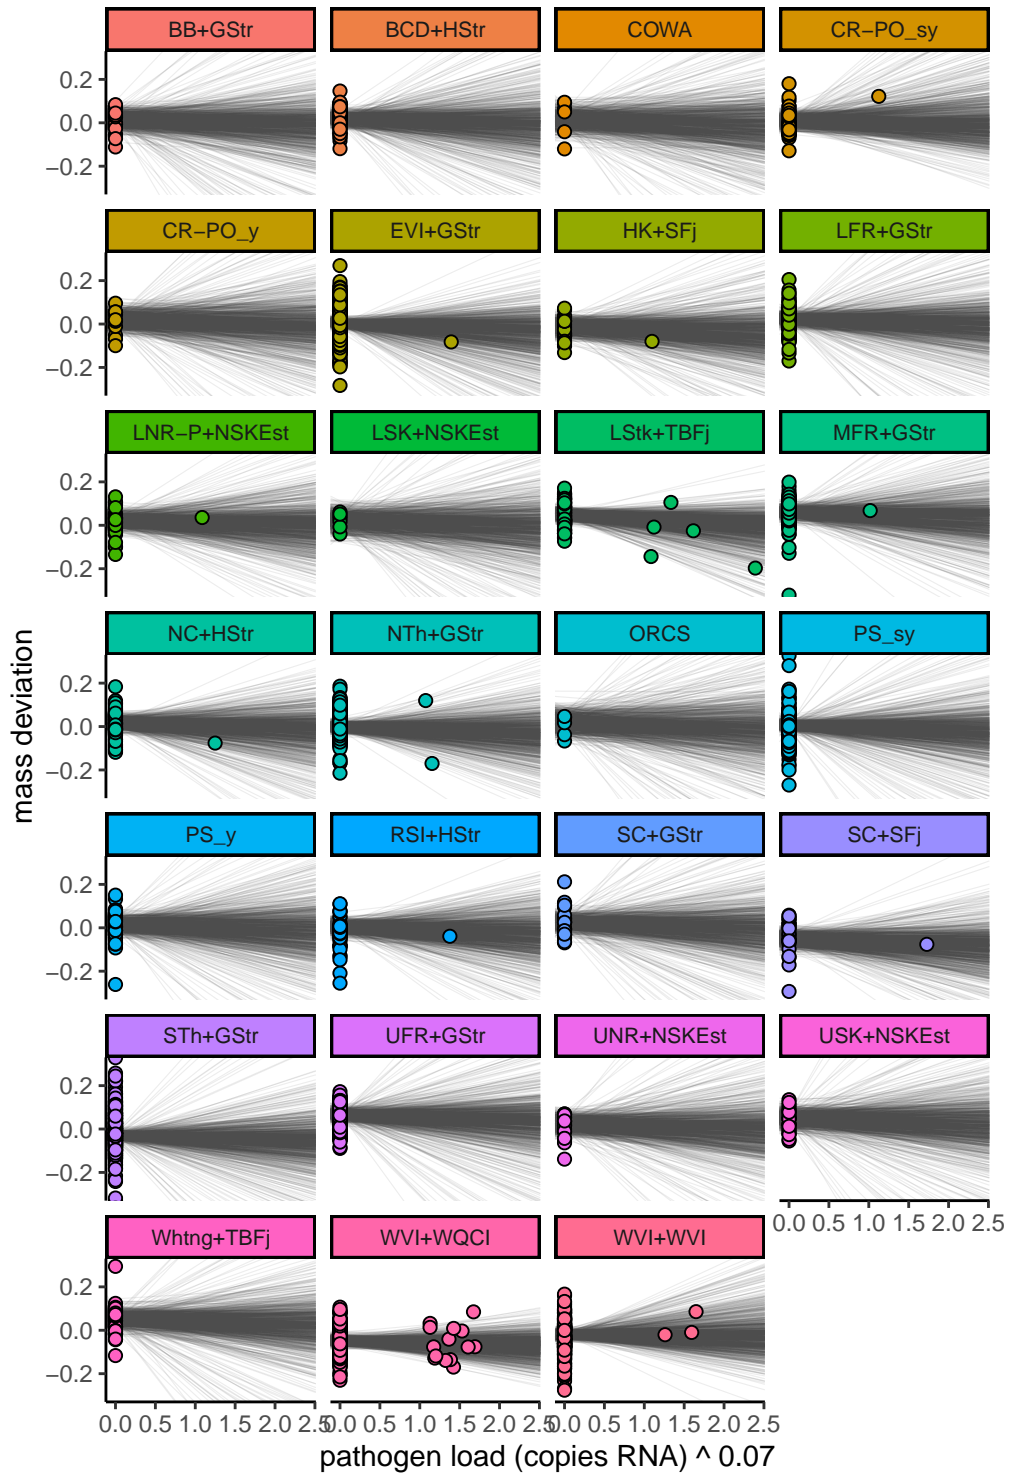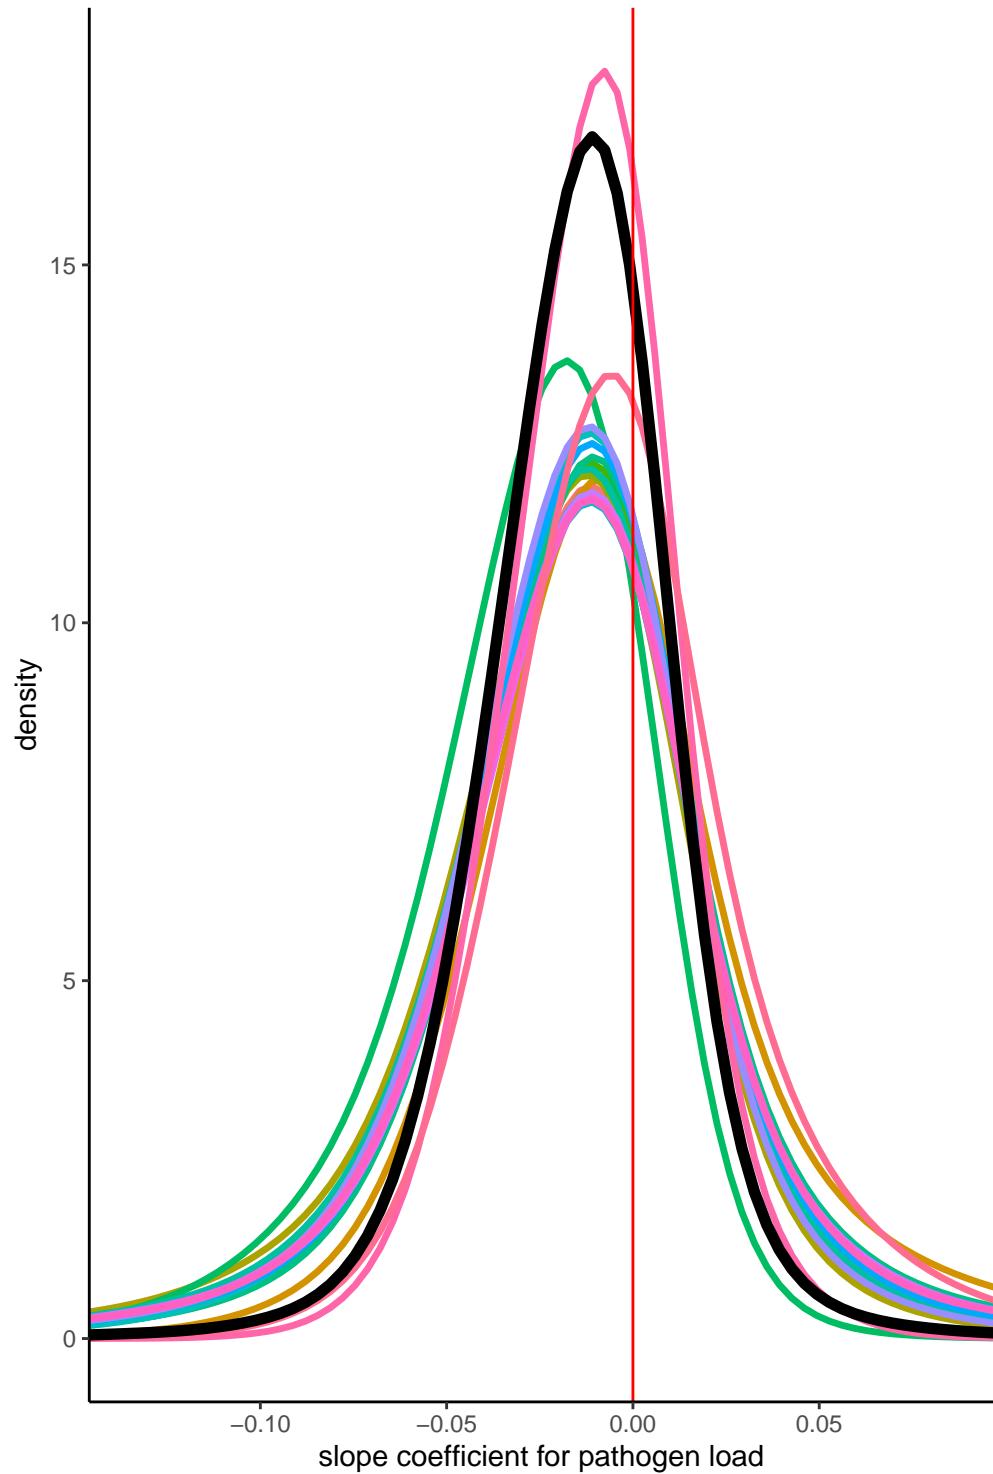

Parvicapsula minibicornis SpSu

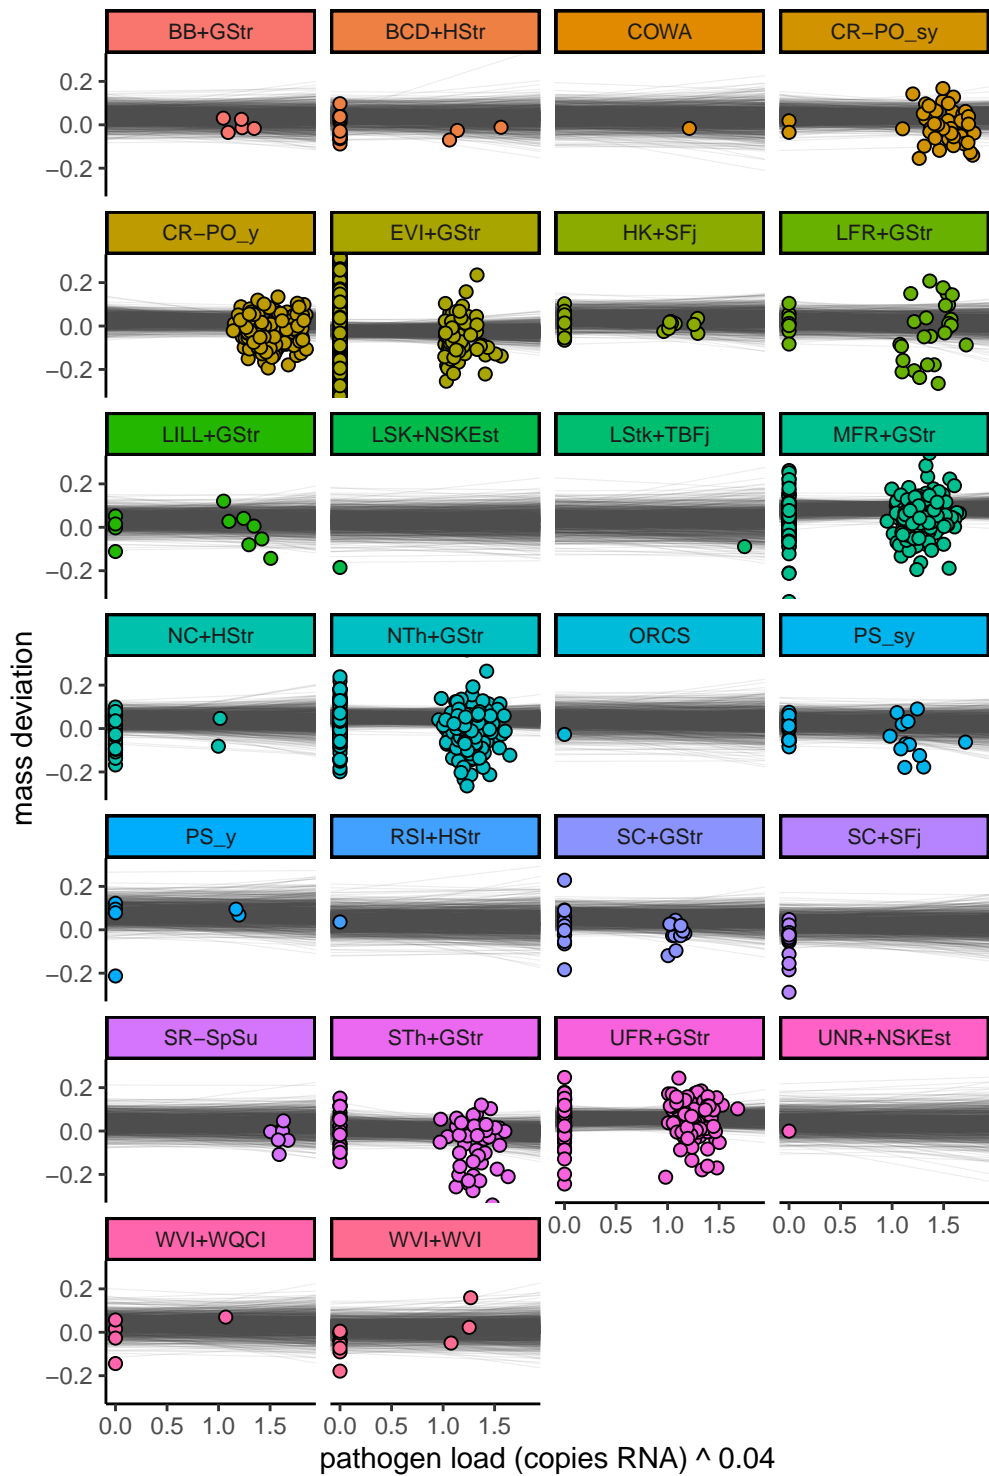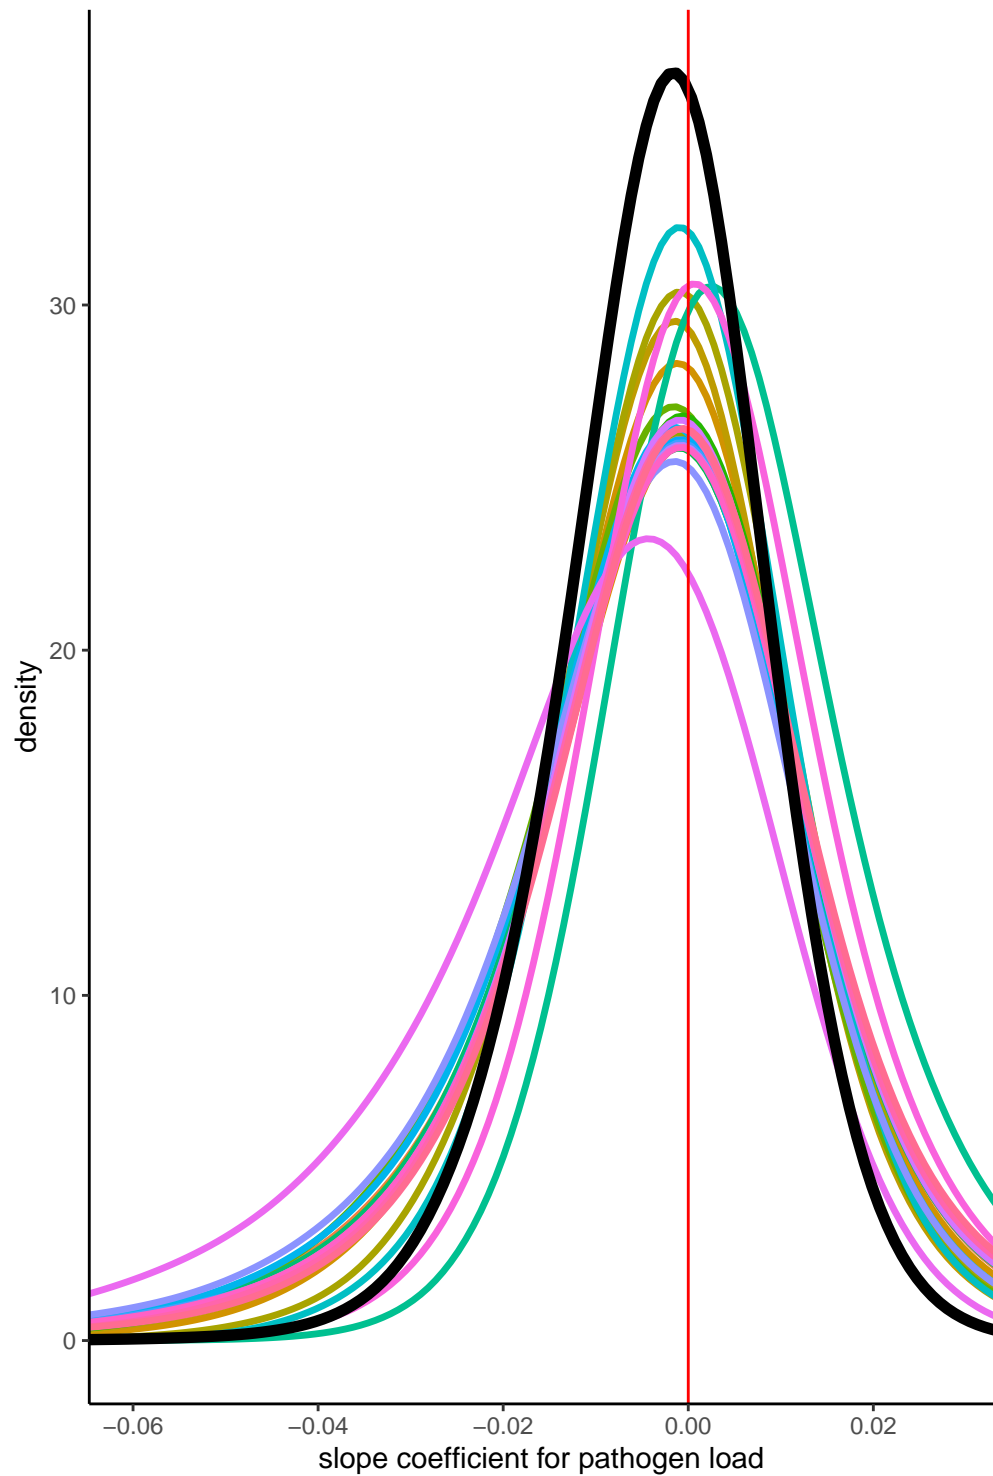

Parvicapsula minibicornis FaWi

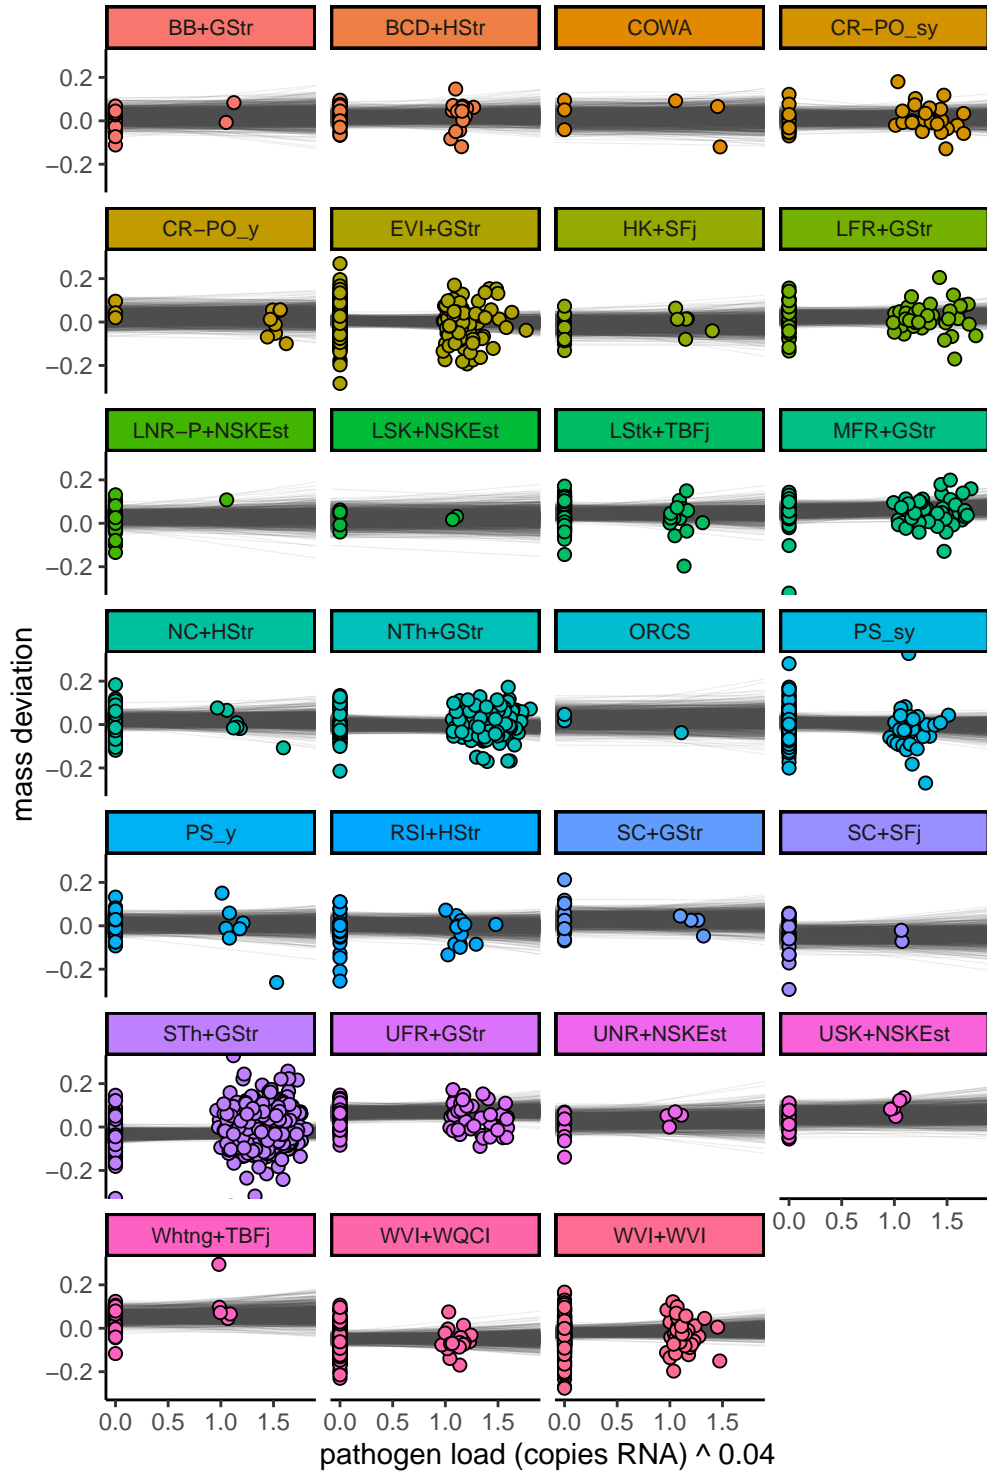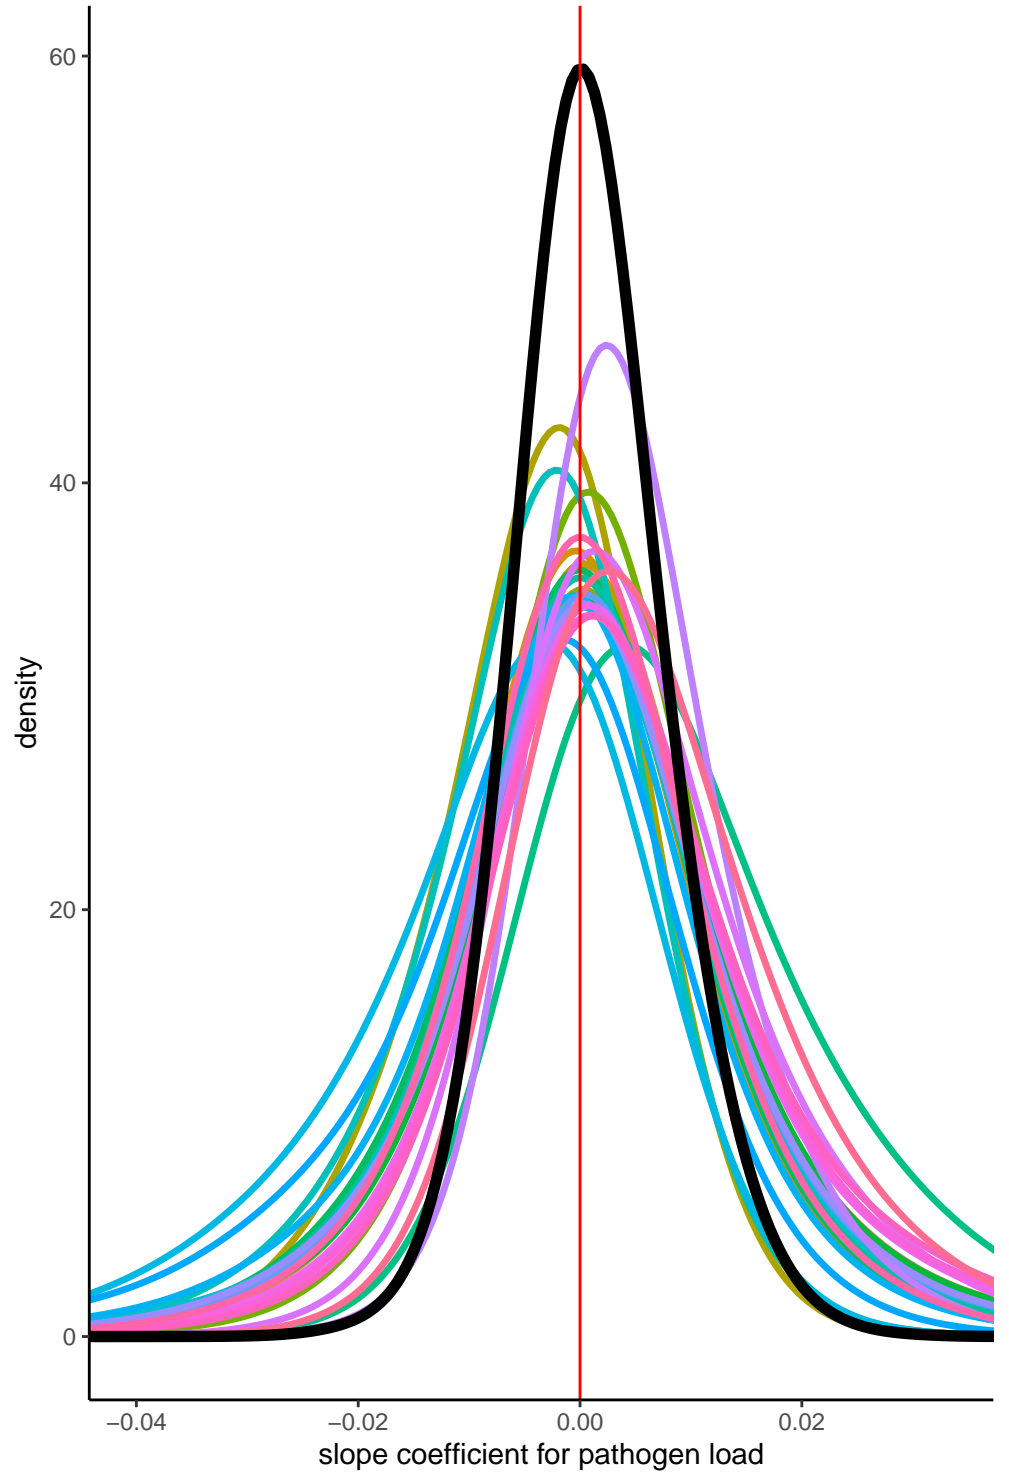

Parvicapsula pseudobranchicola SpSu

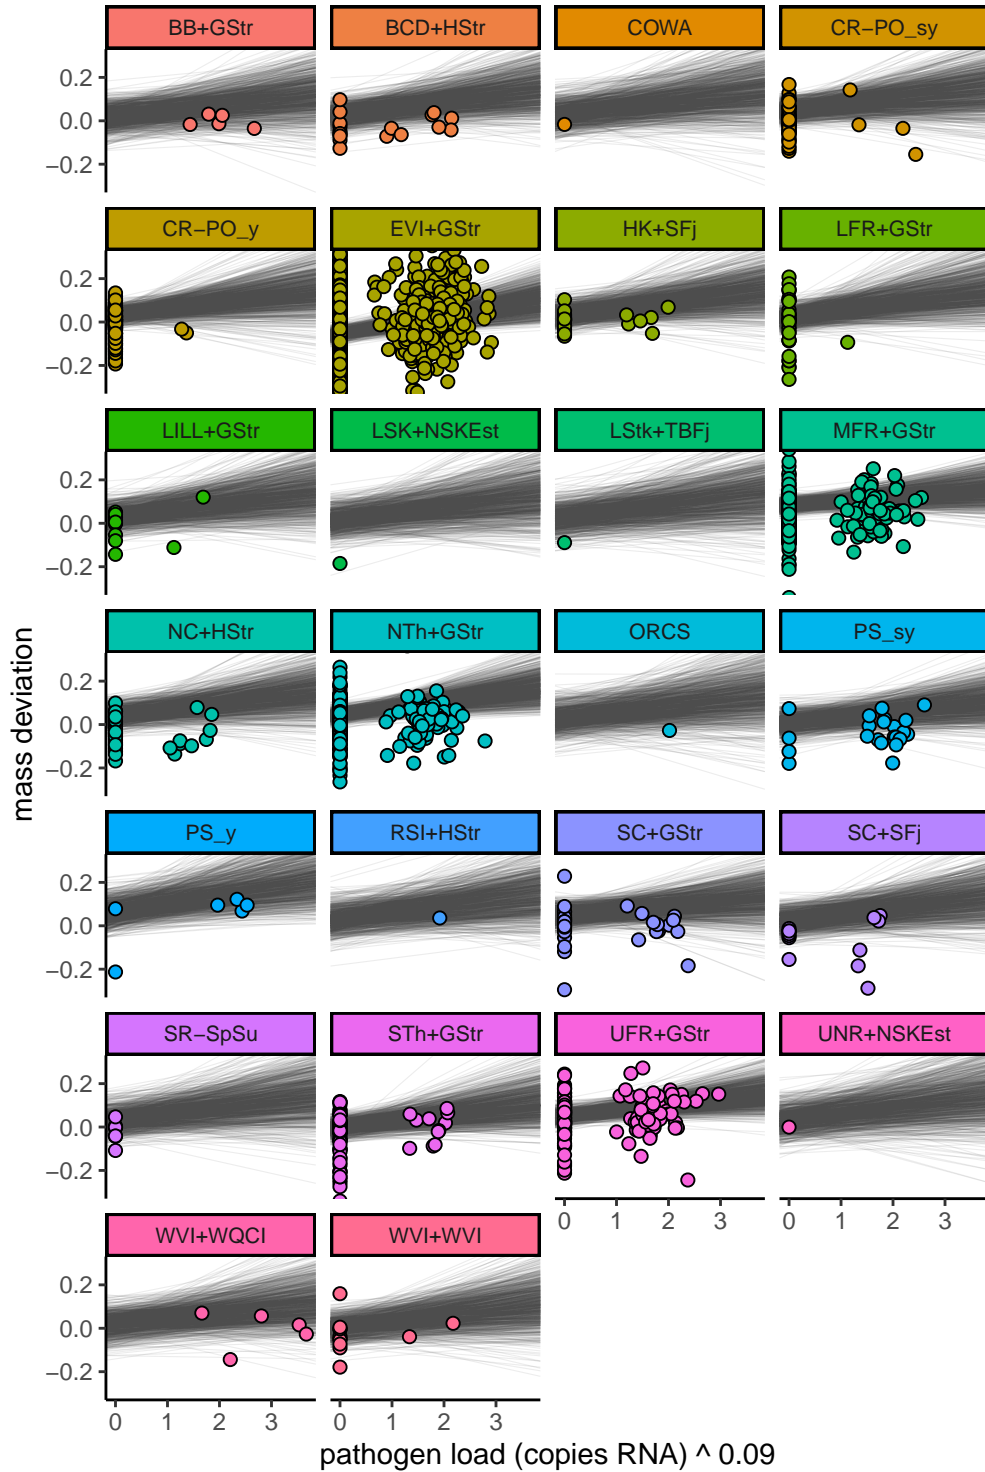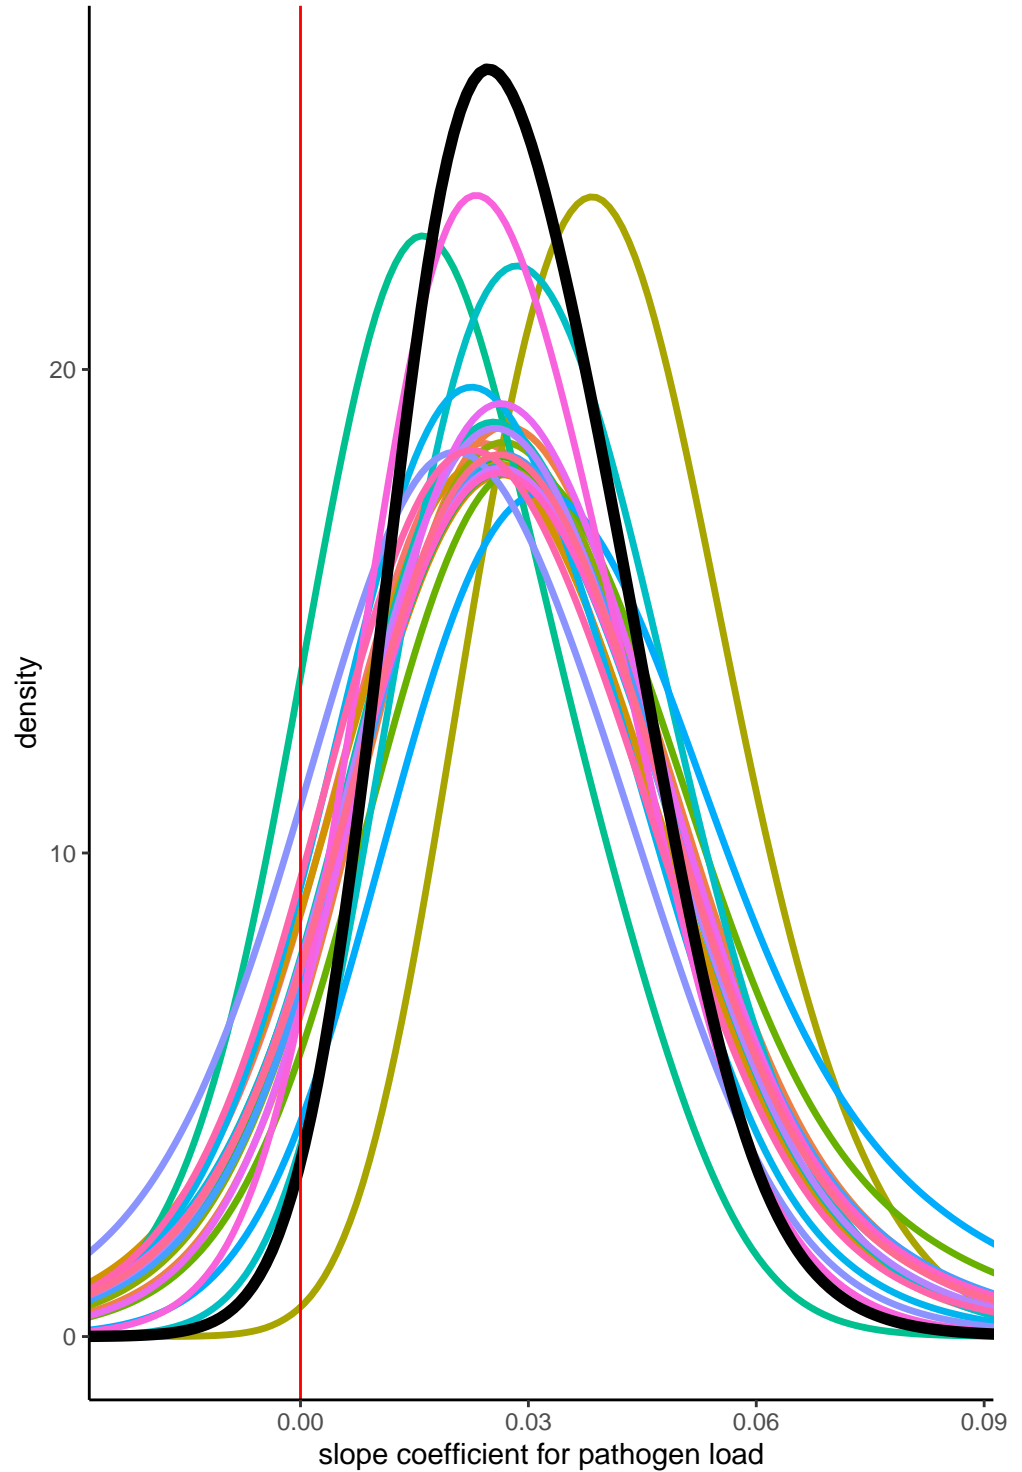

Parvicapsula pseudobranchicola FaWi

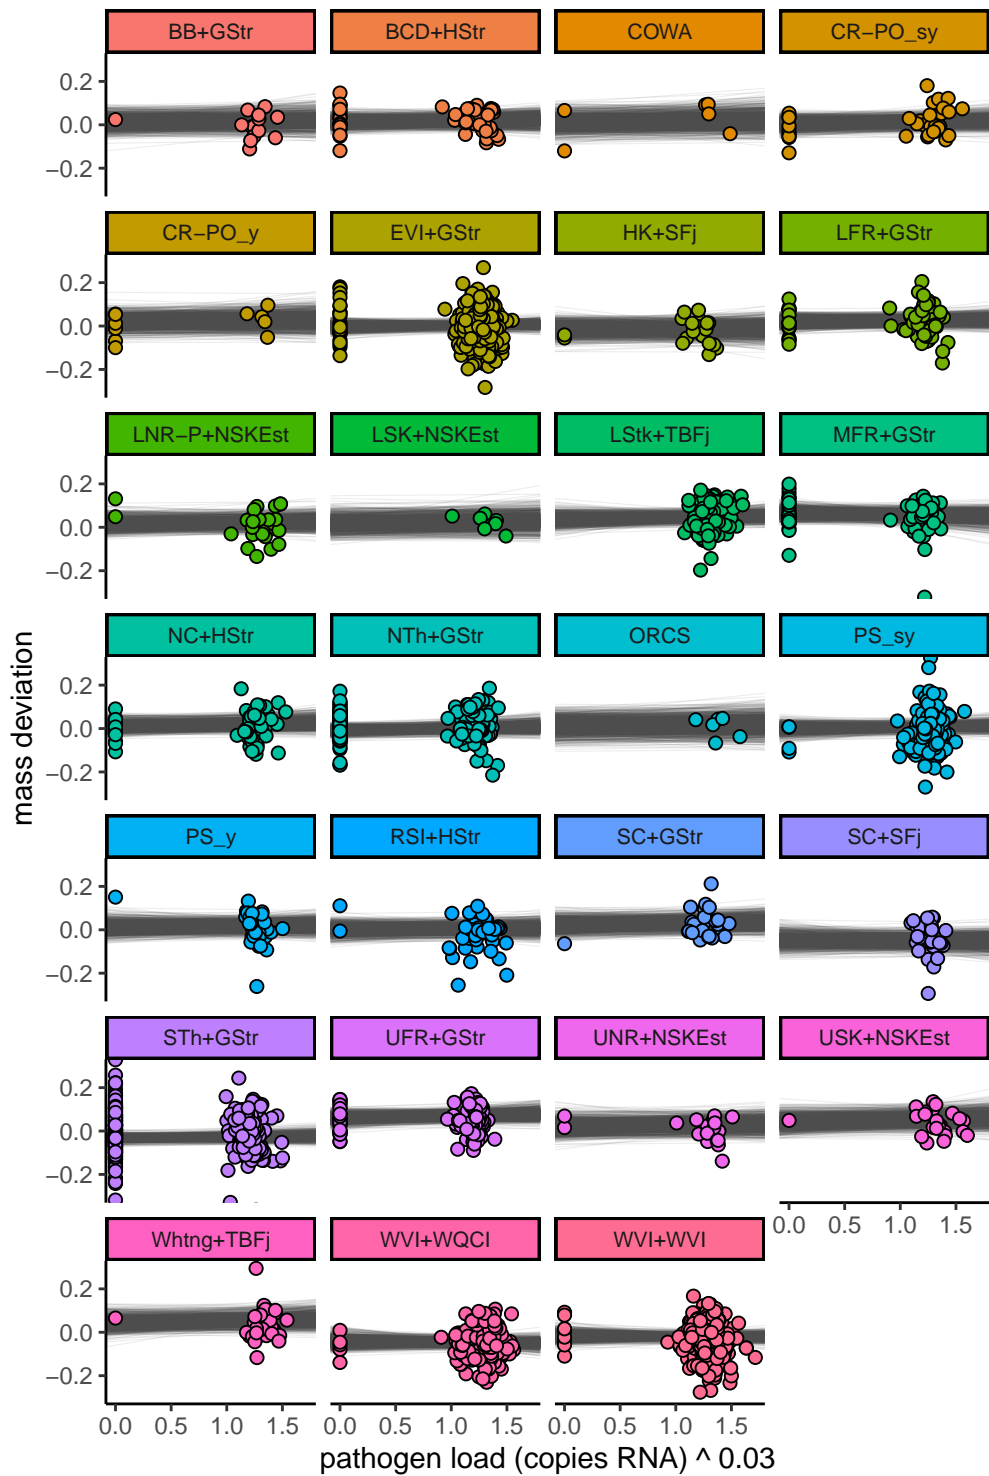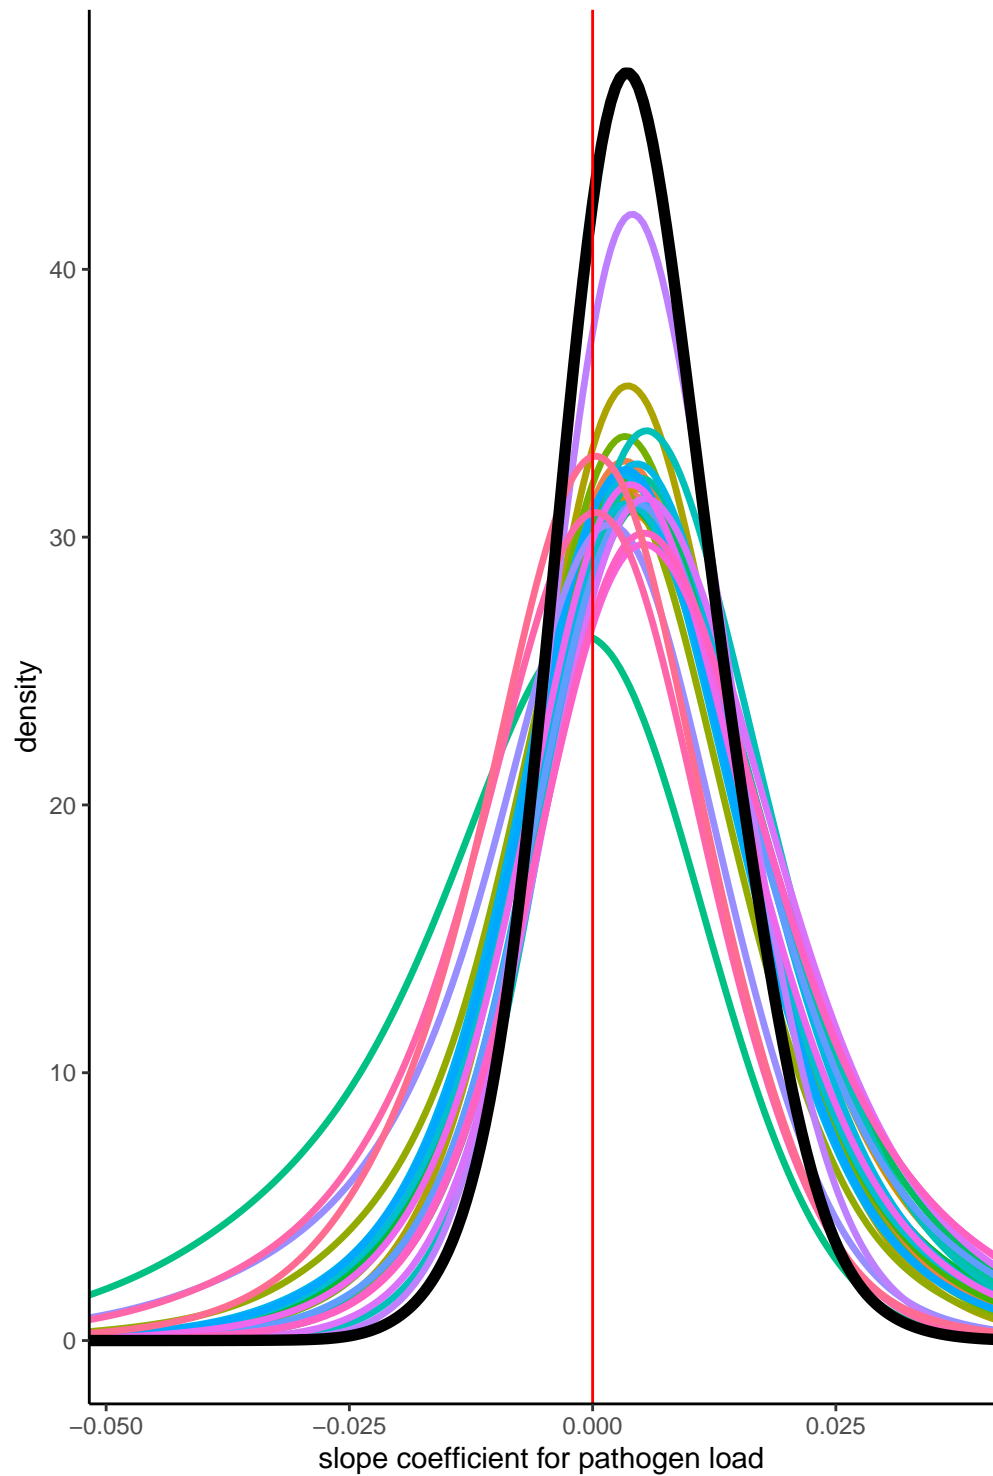

Paranucleospora theridion SpSu

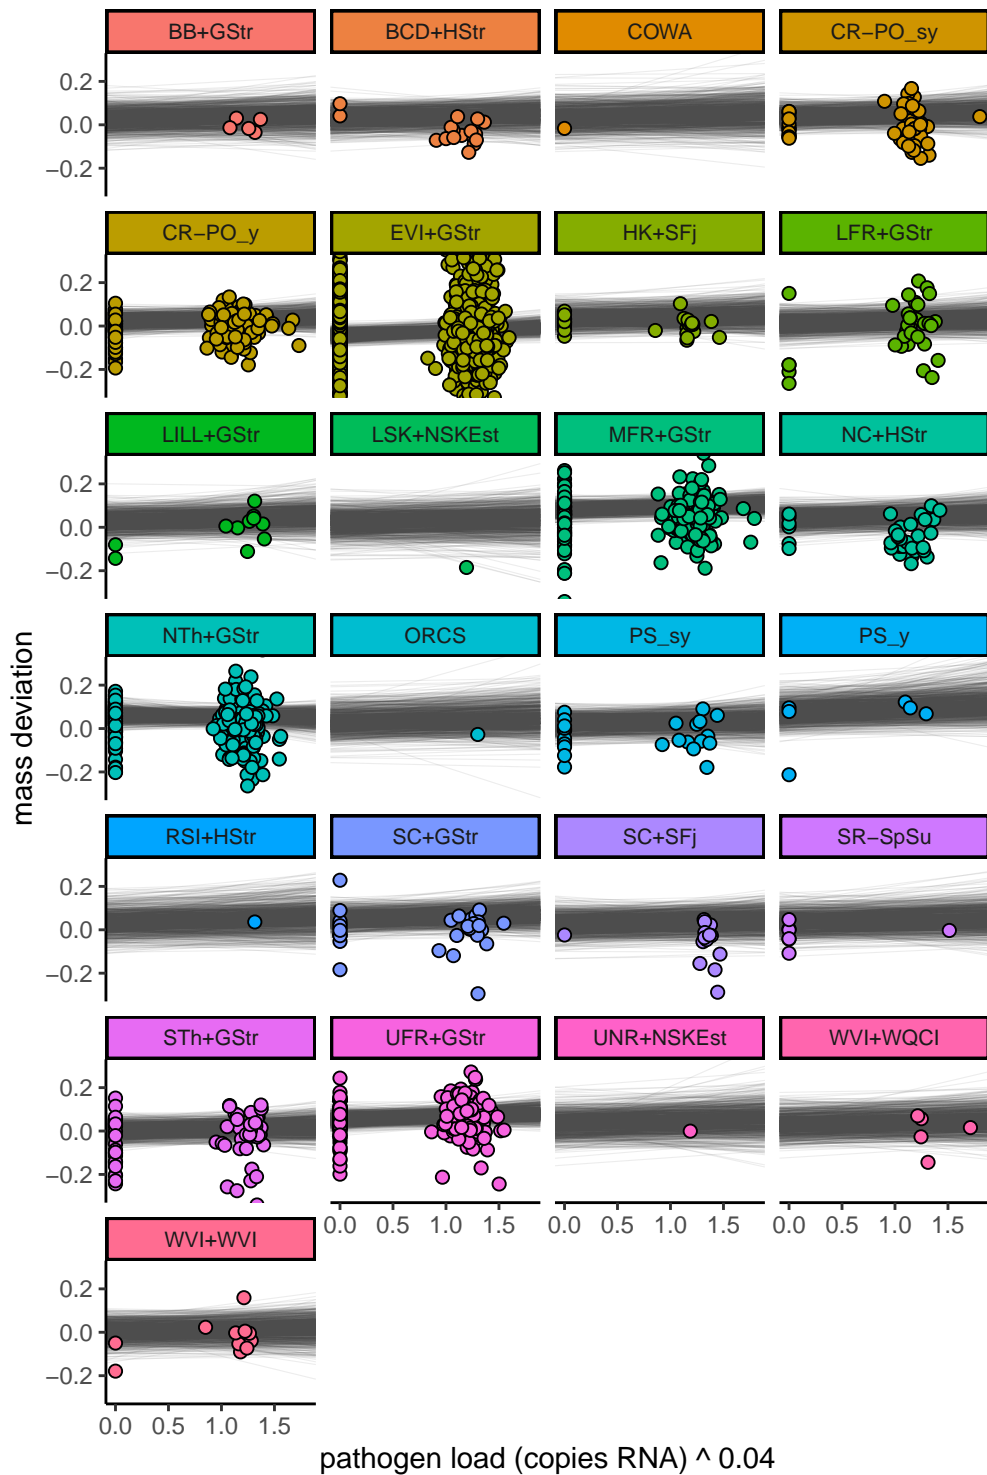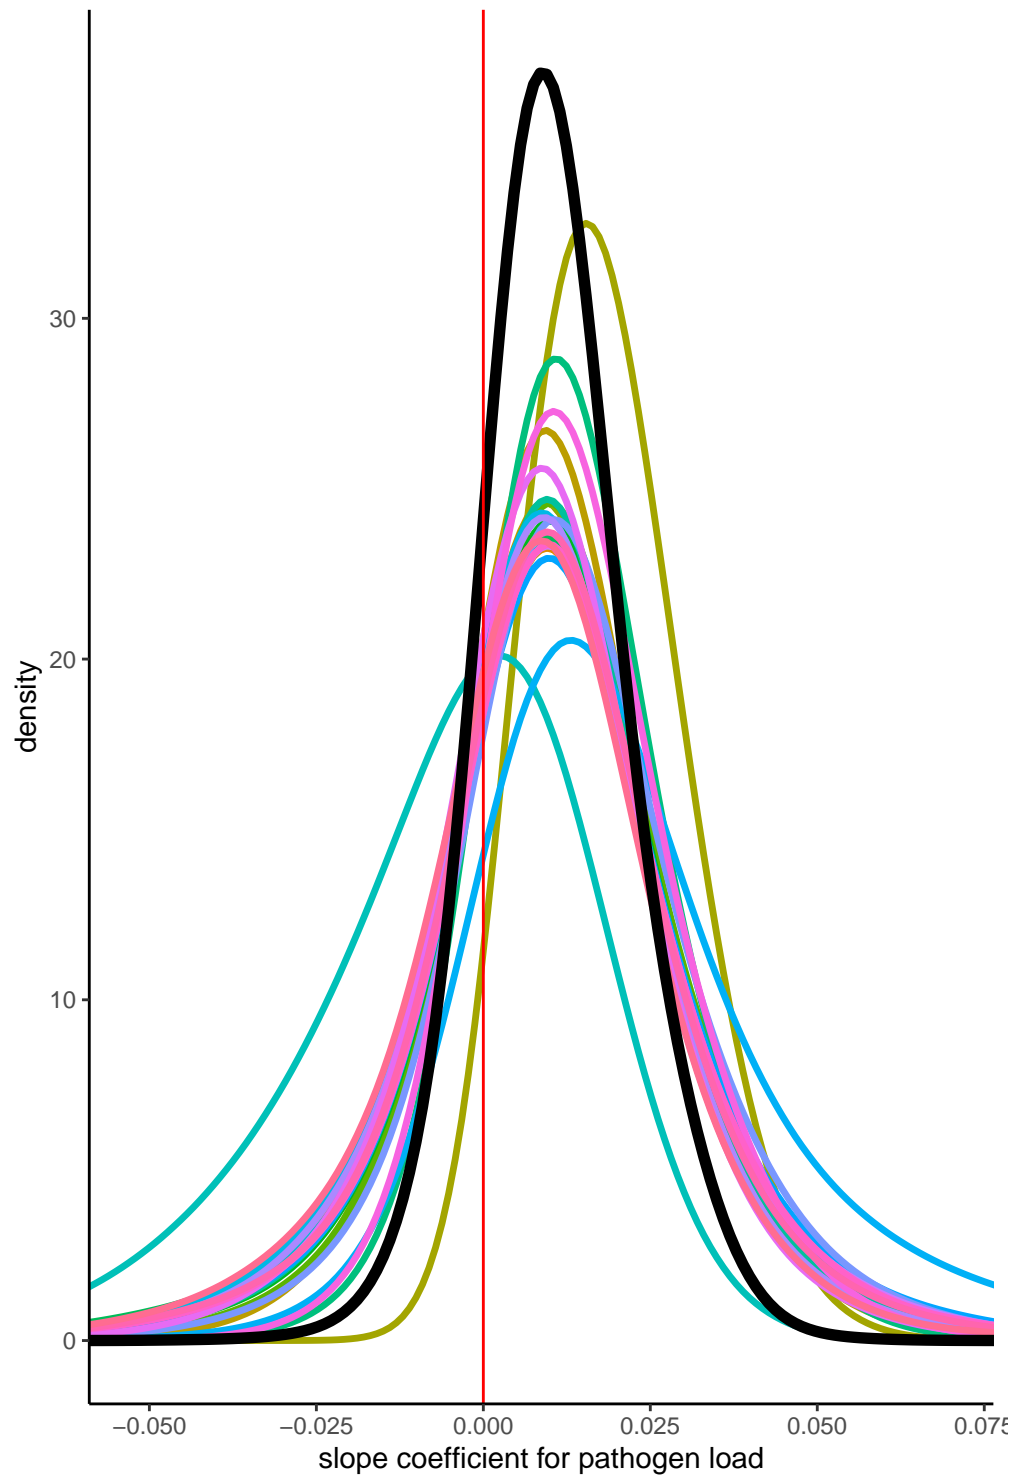



Paranucleospora theridion FaWi

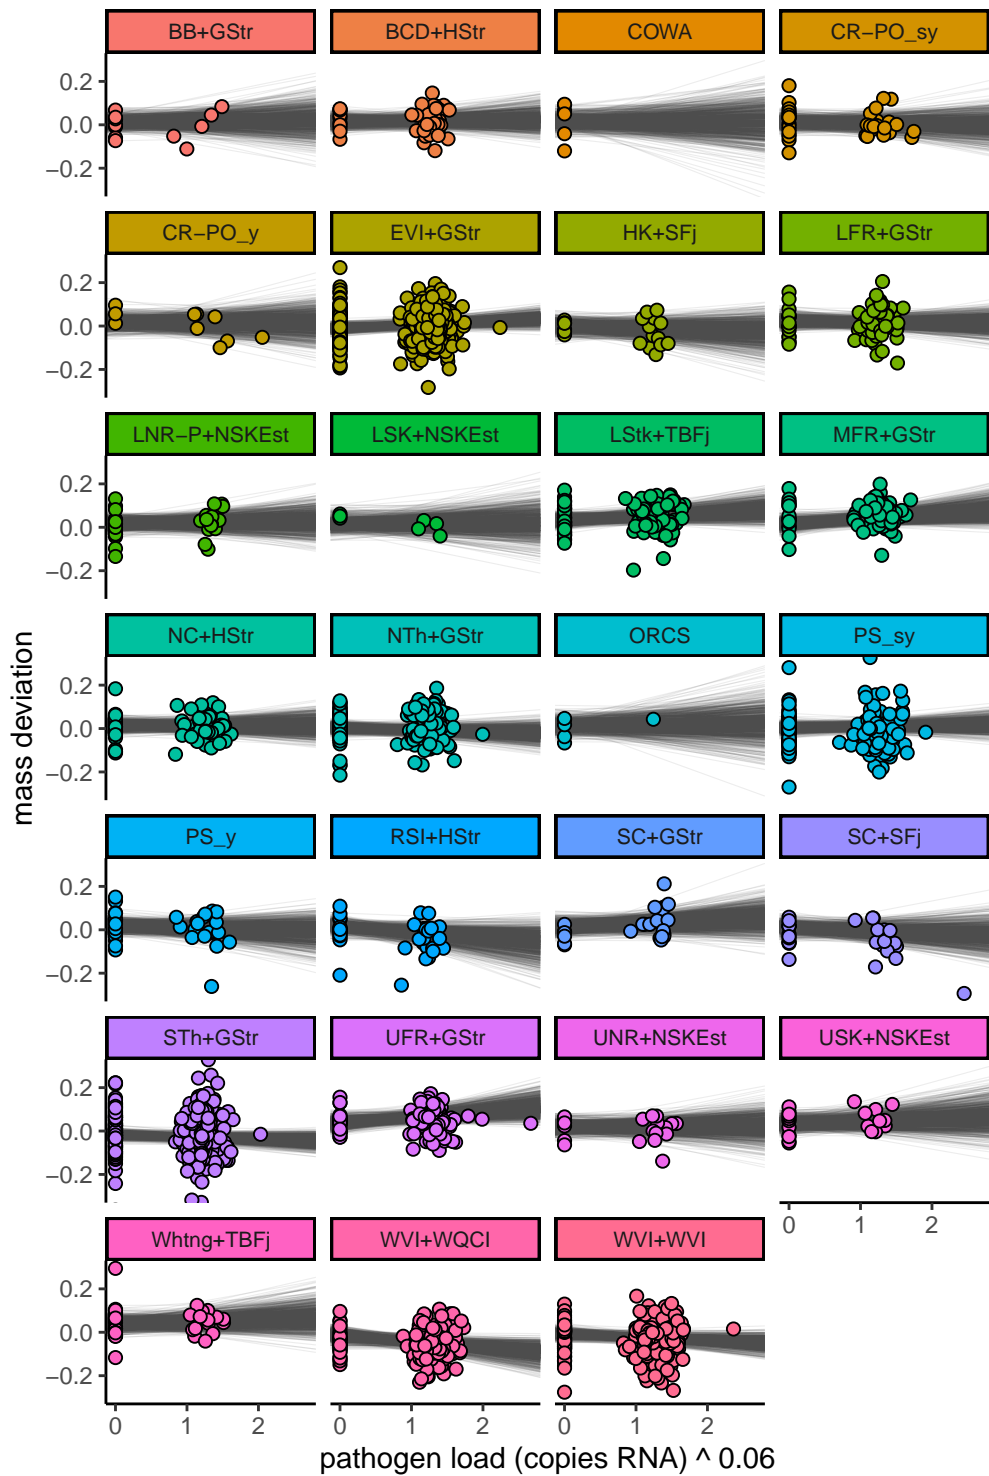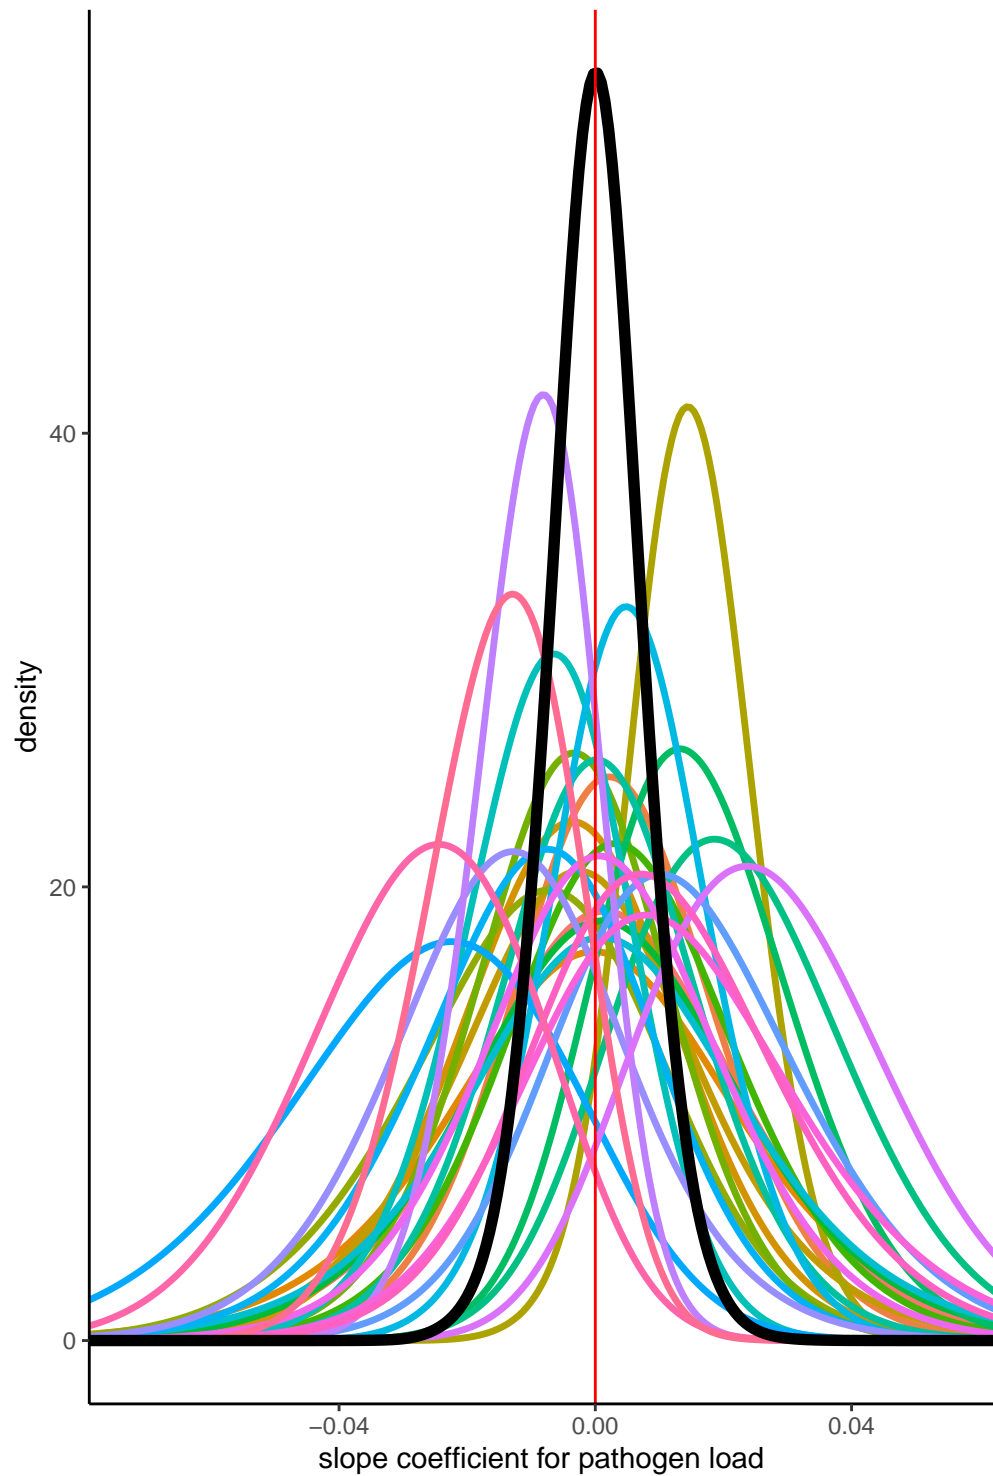

Candidatus *Piscichlamydia salmonis* SpSu

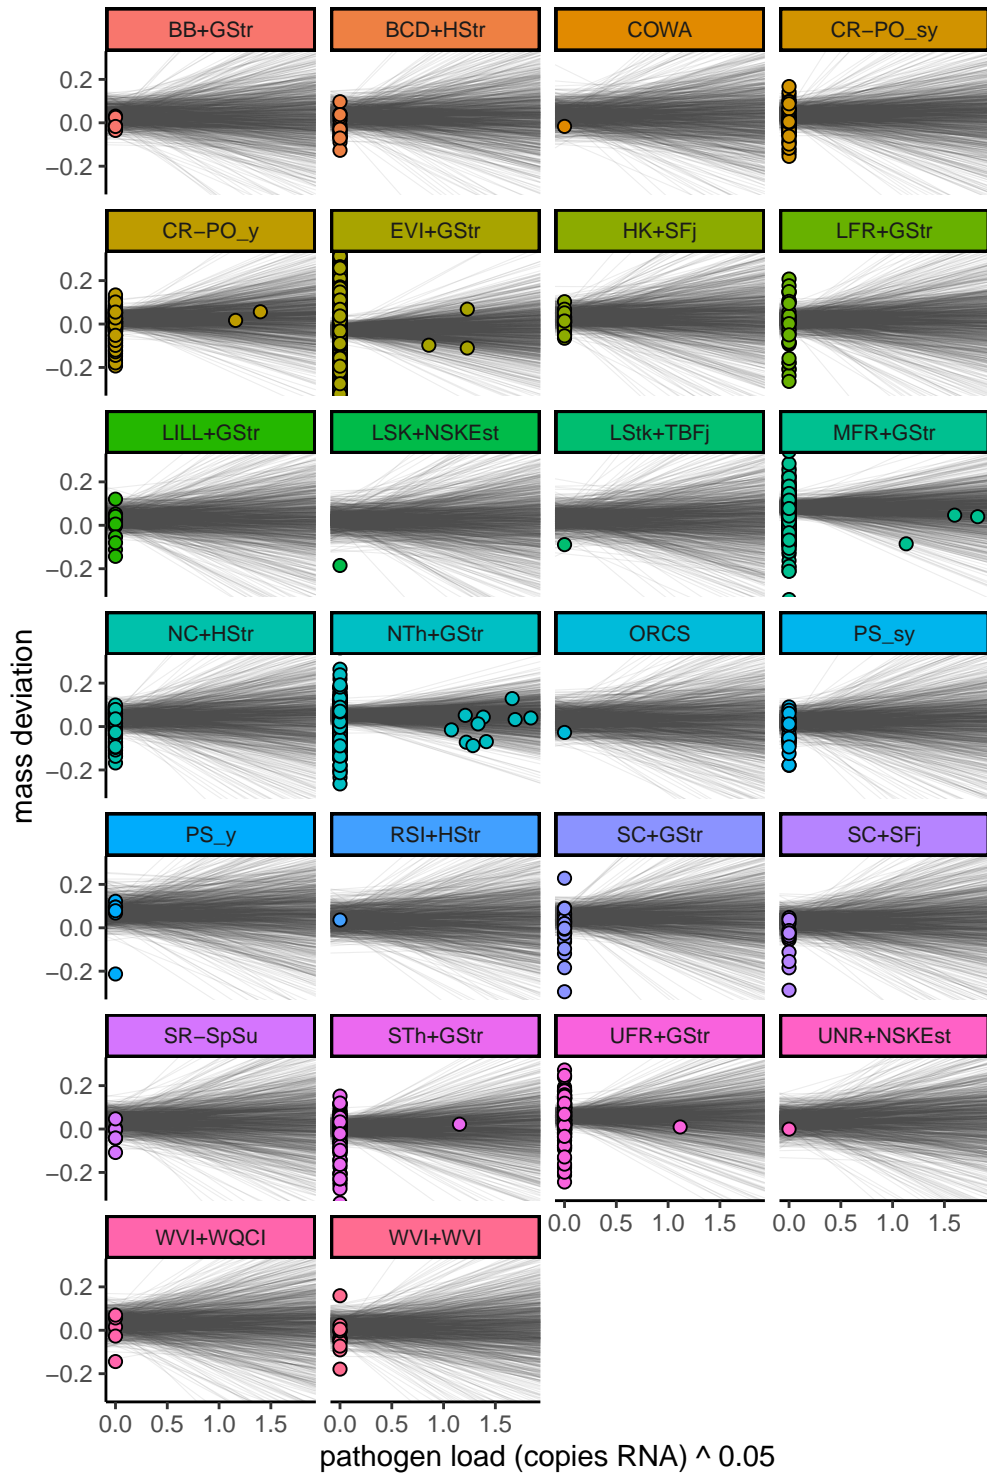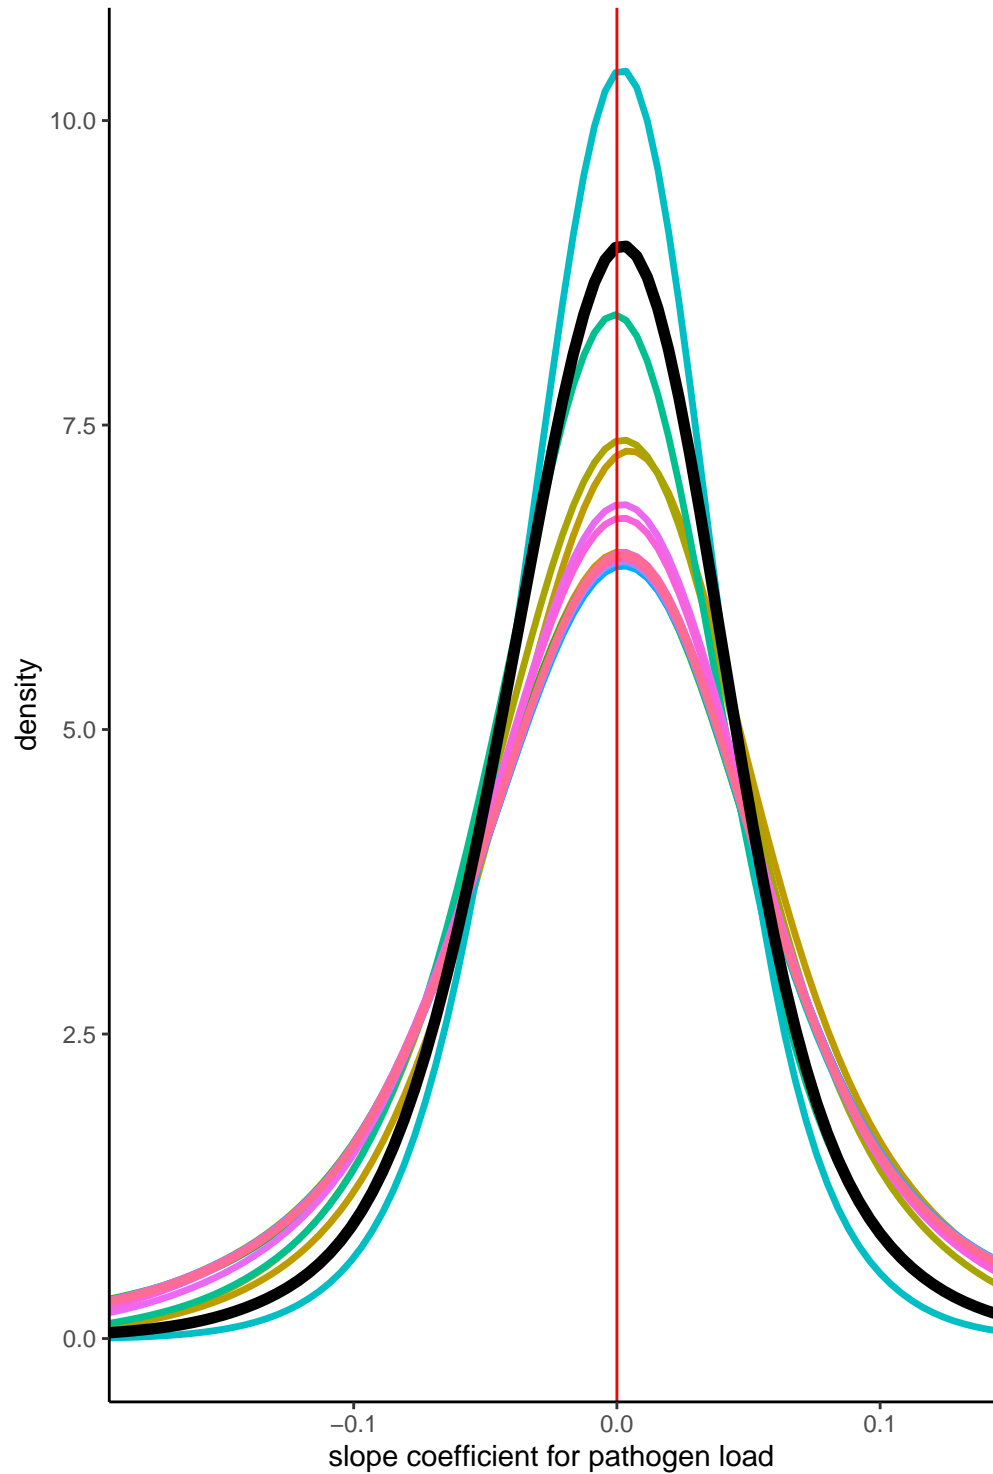

*Piscirickettsia salmonis* FaWi

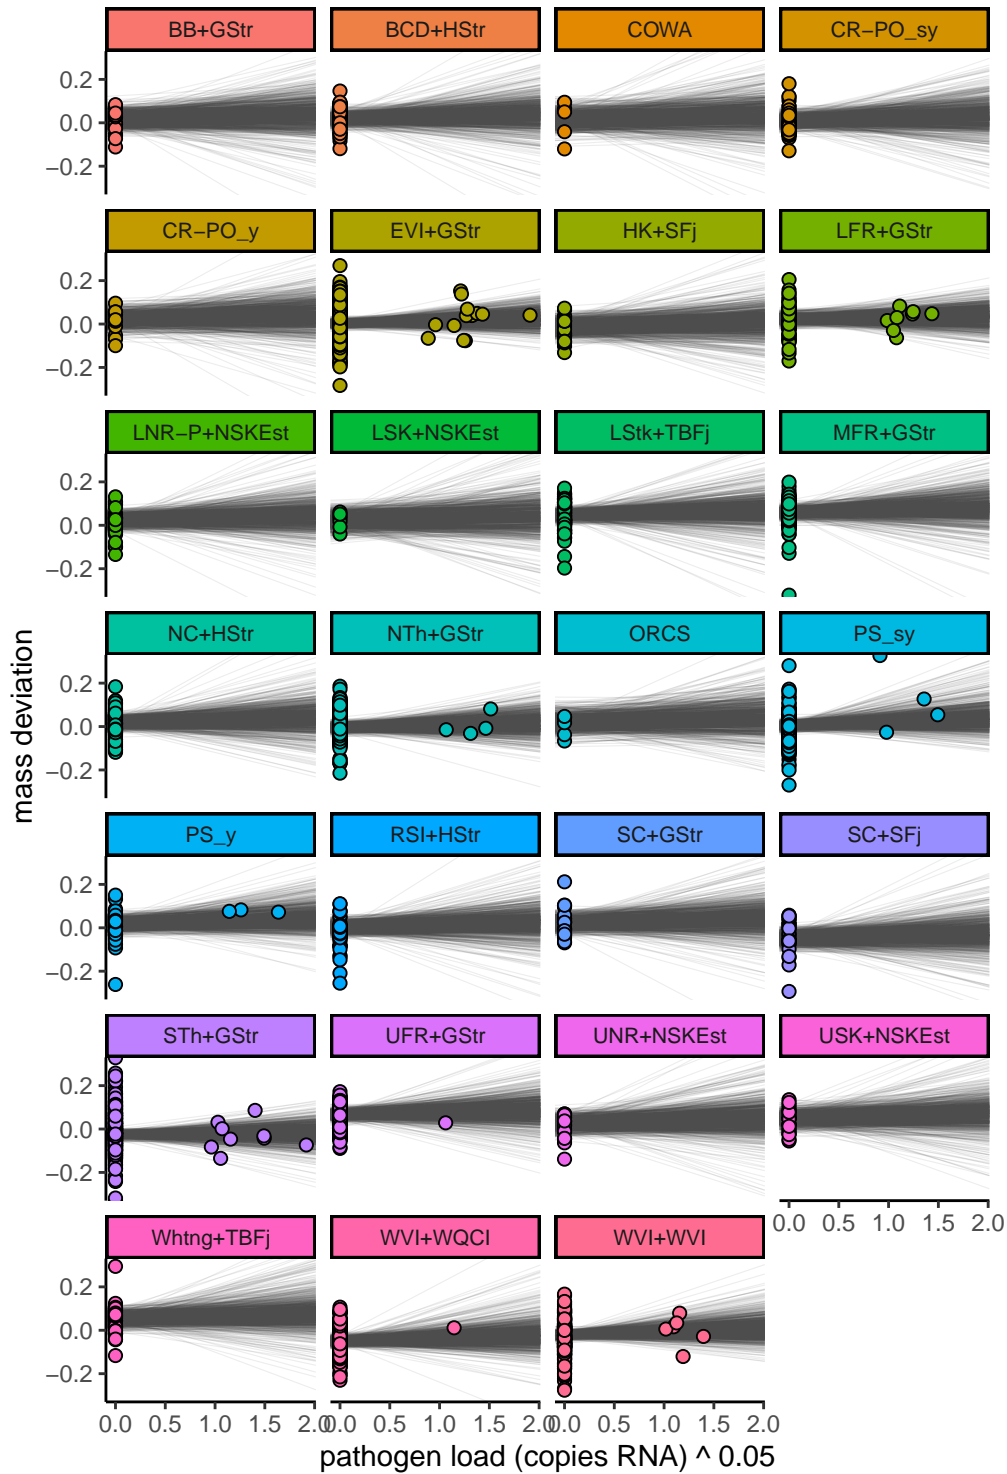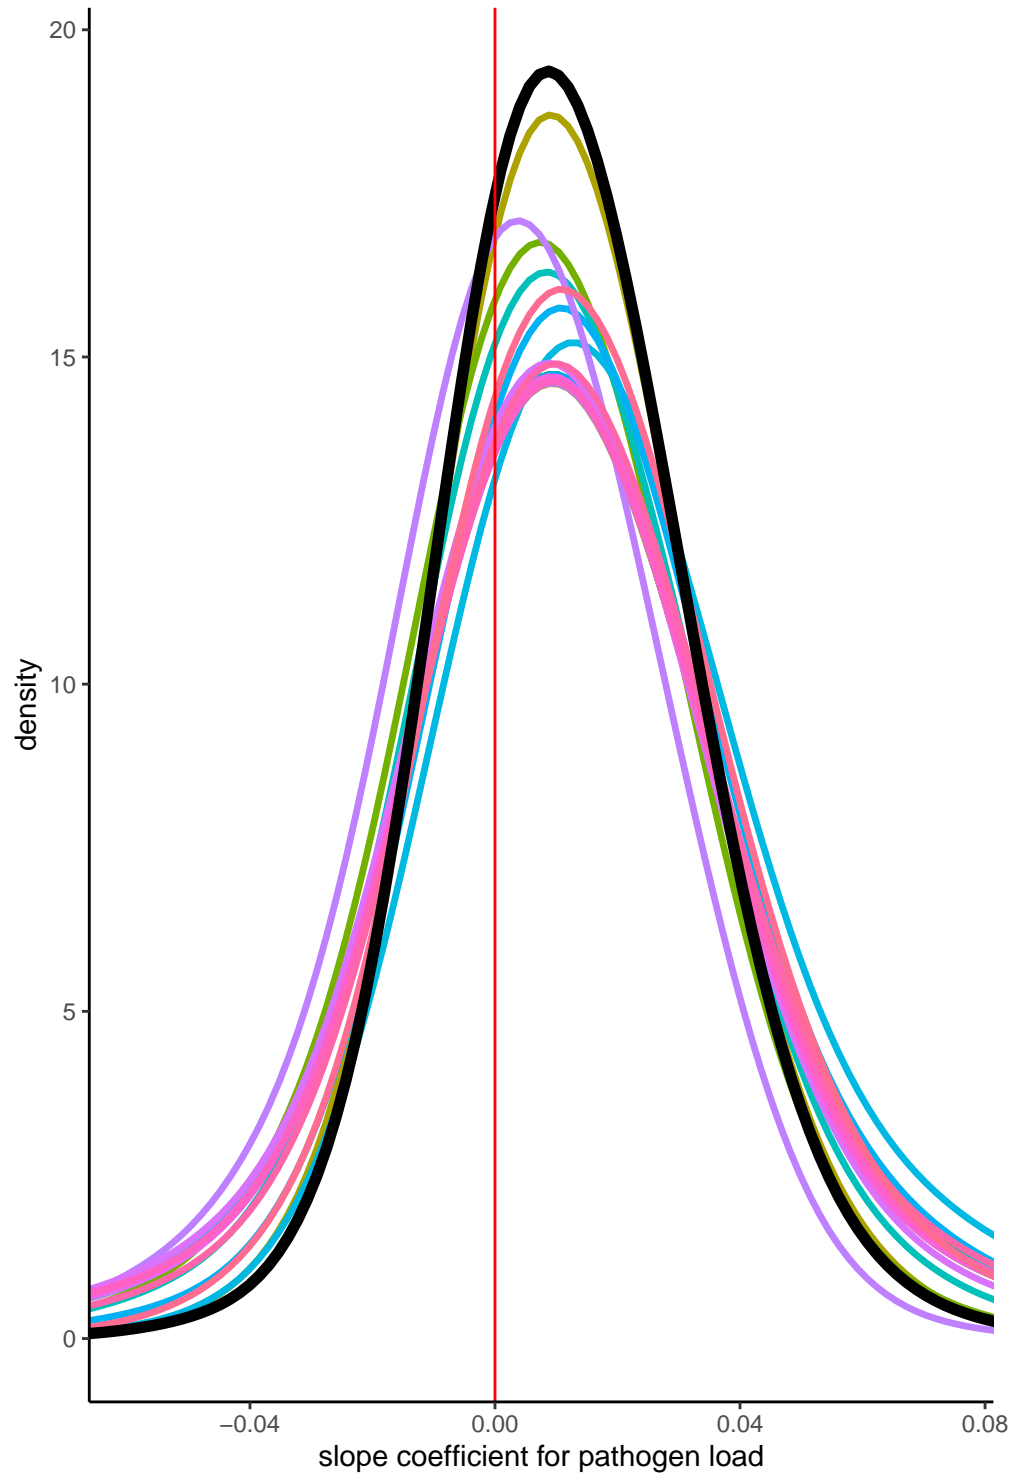

Piscine Orthoreovirus SpSu

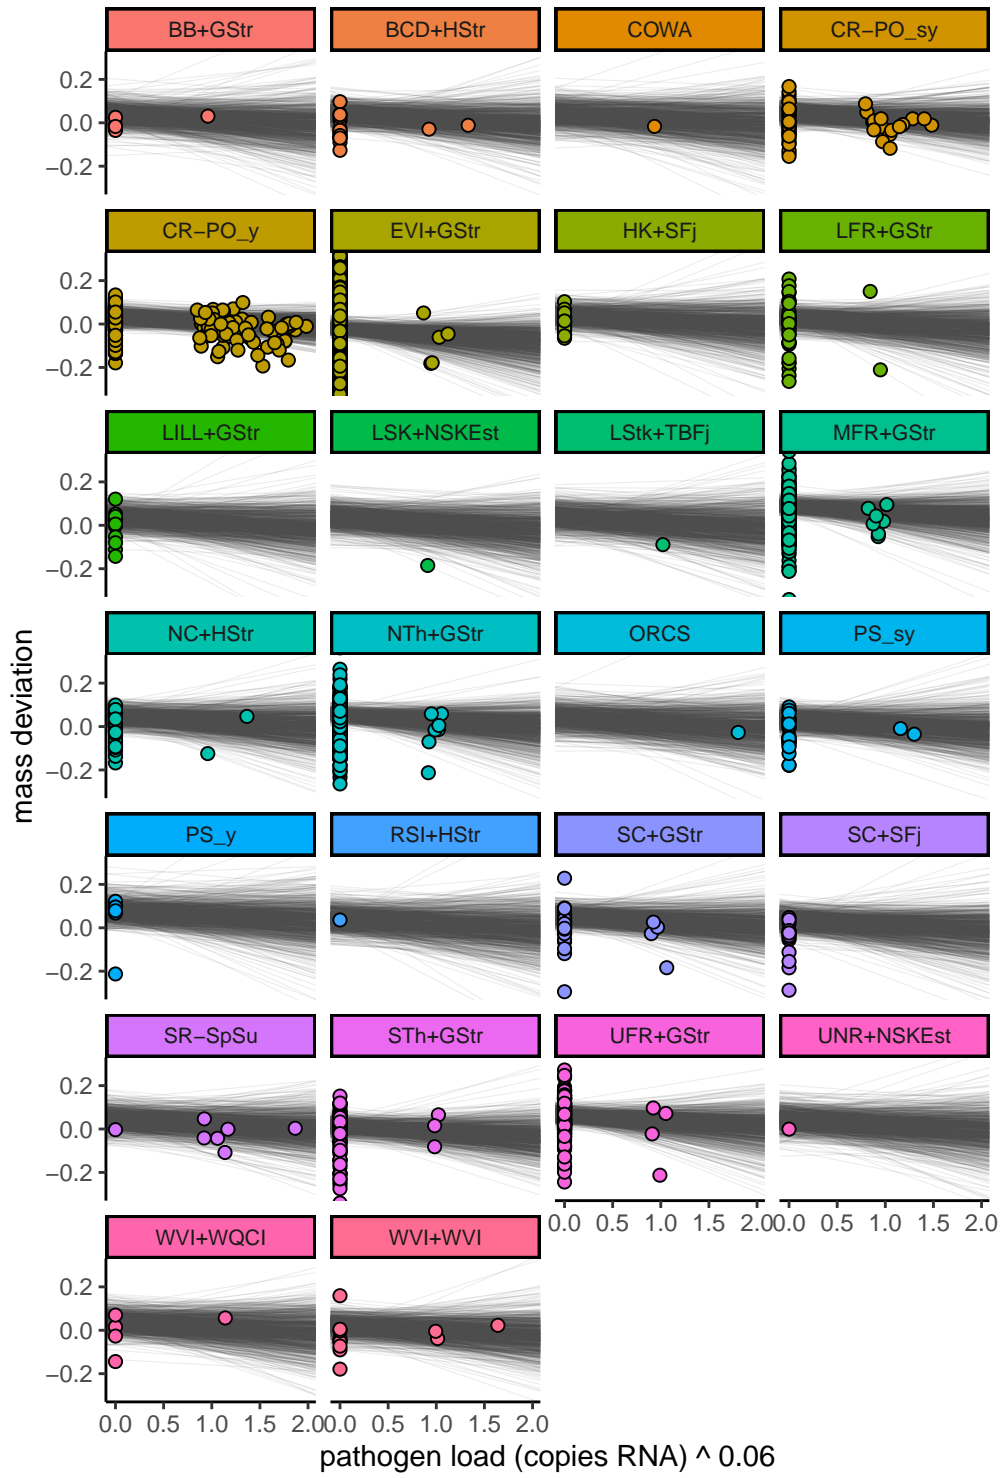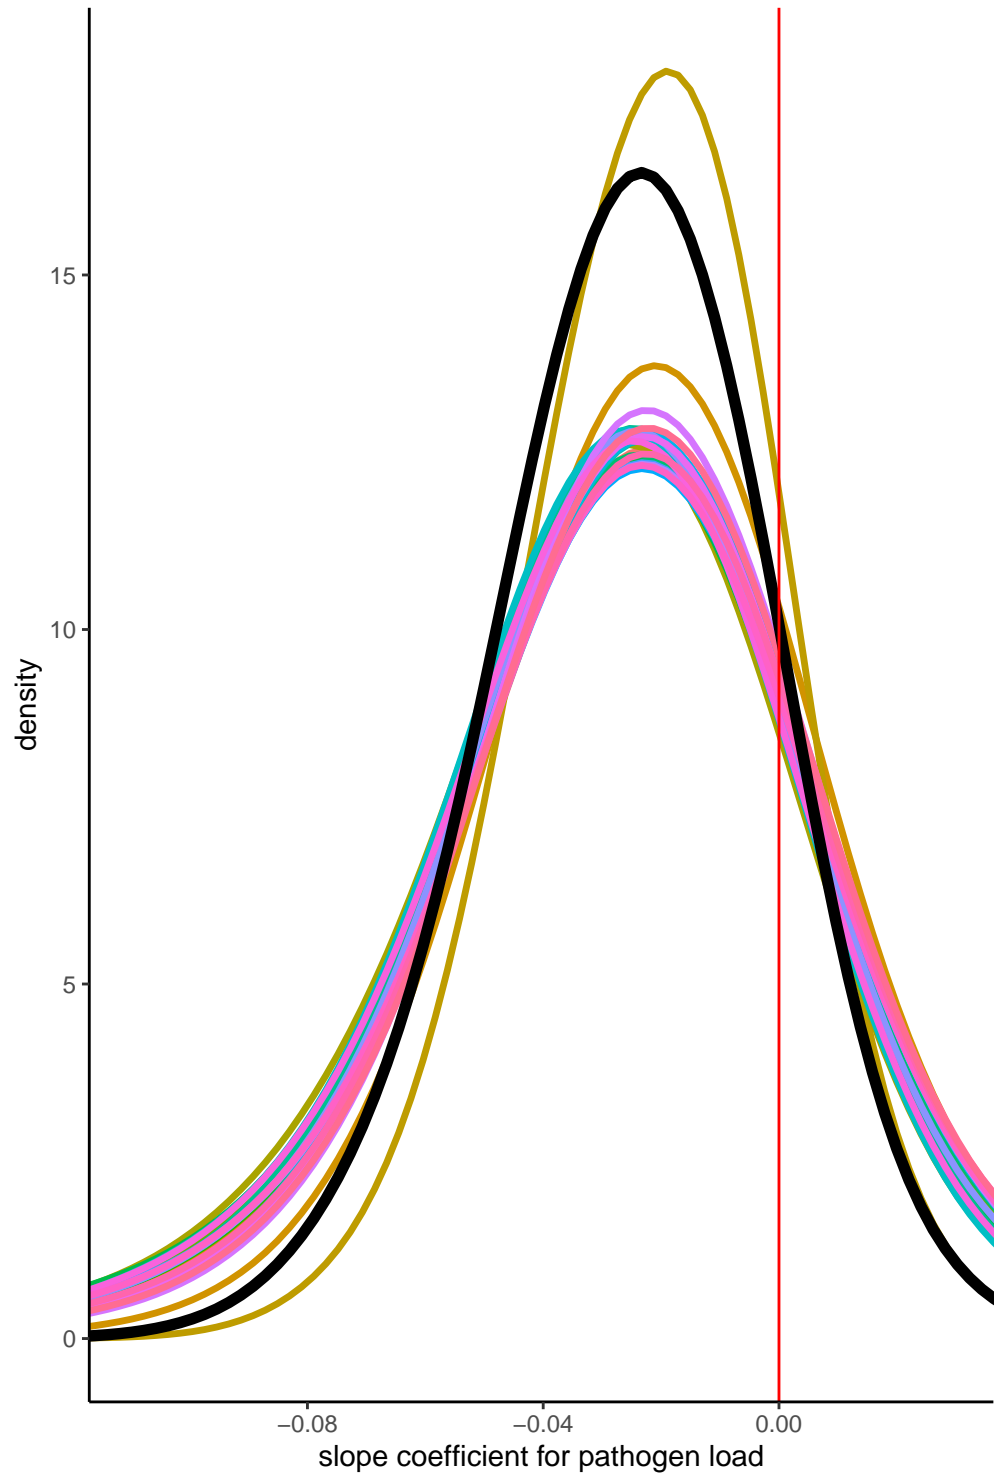

Piscine Orthoreovirus FaWi

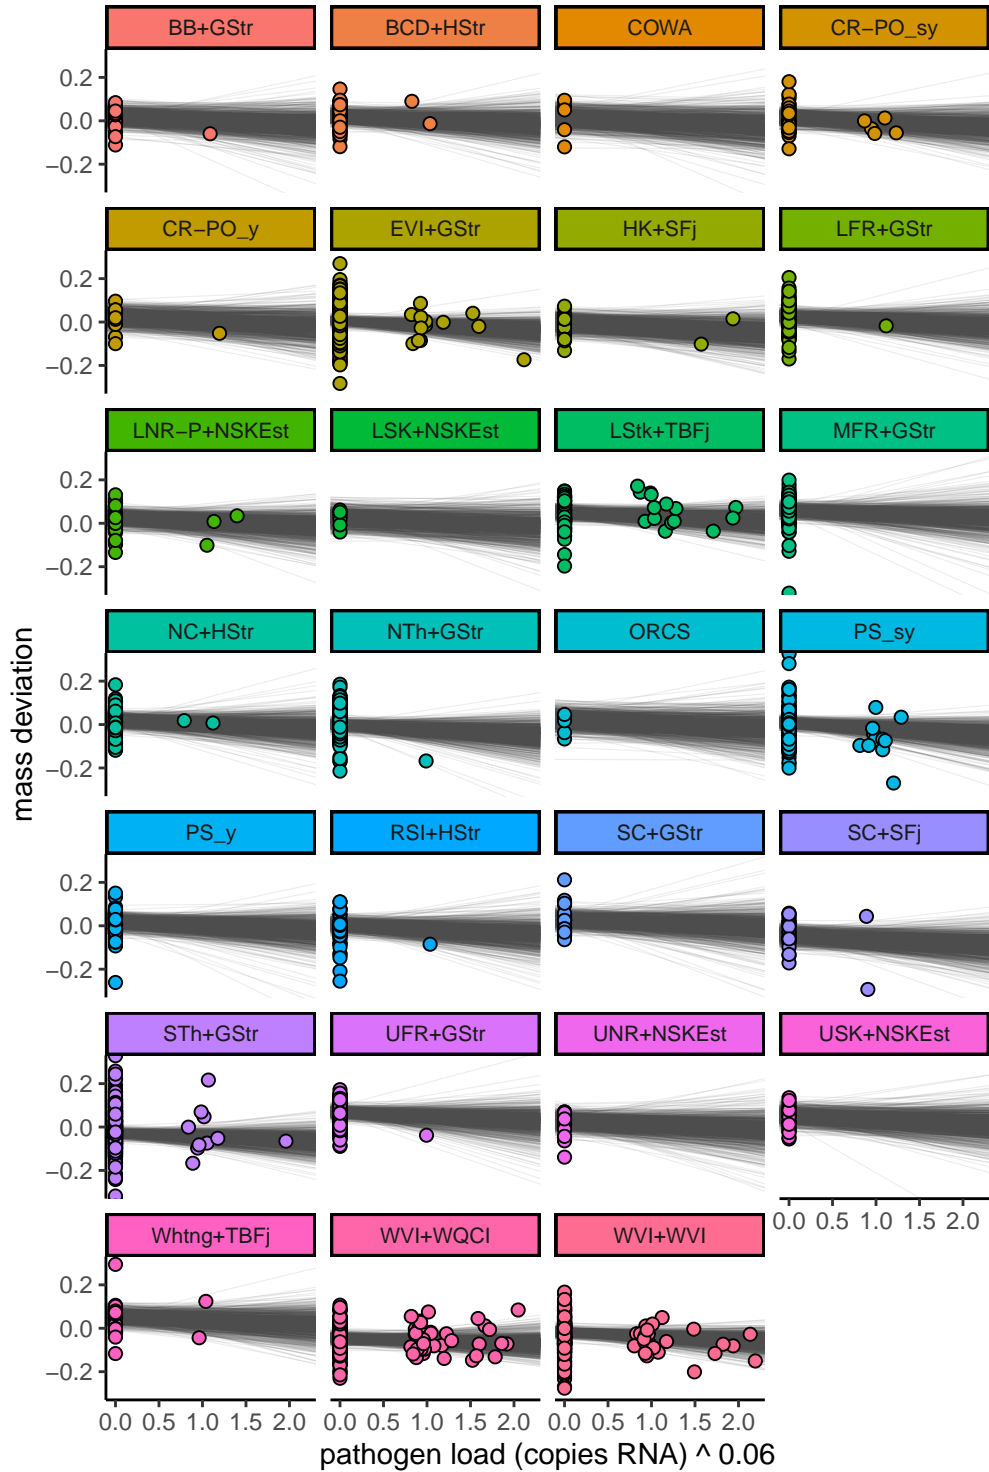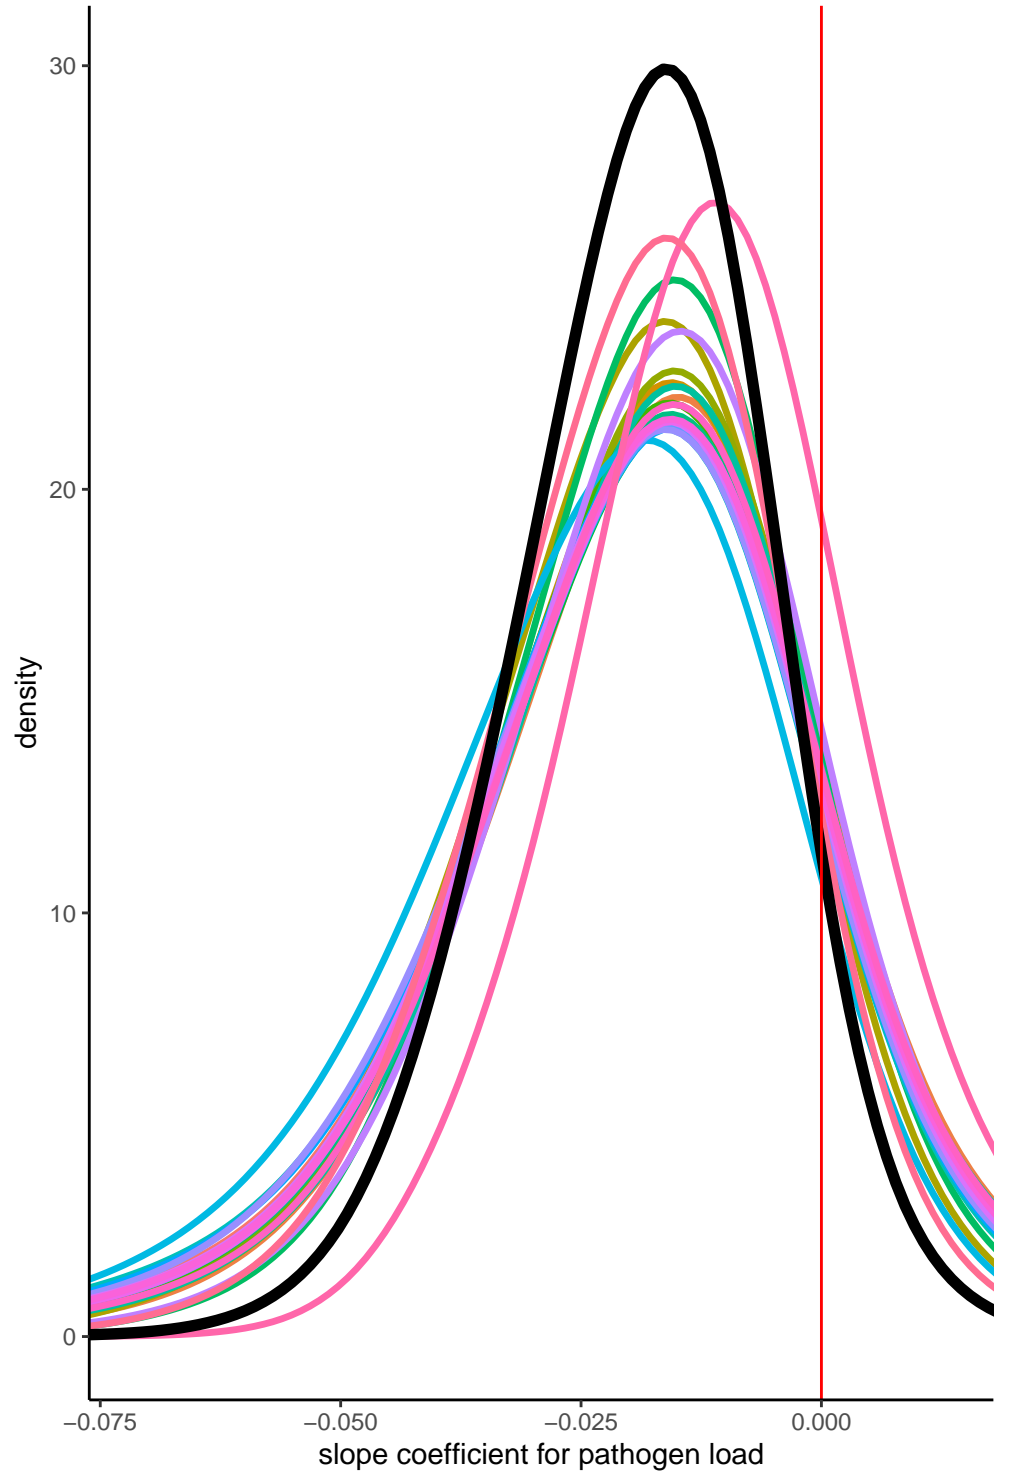

Renibacterium salmoninarum SpSu

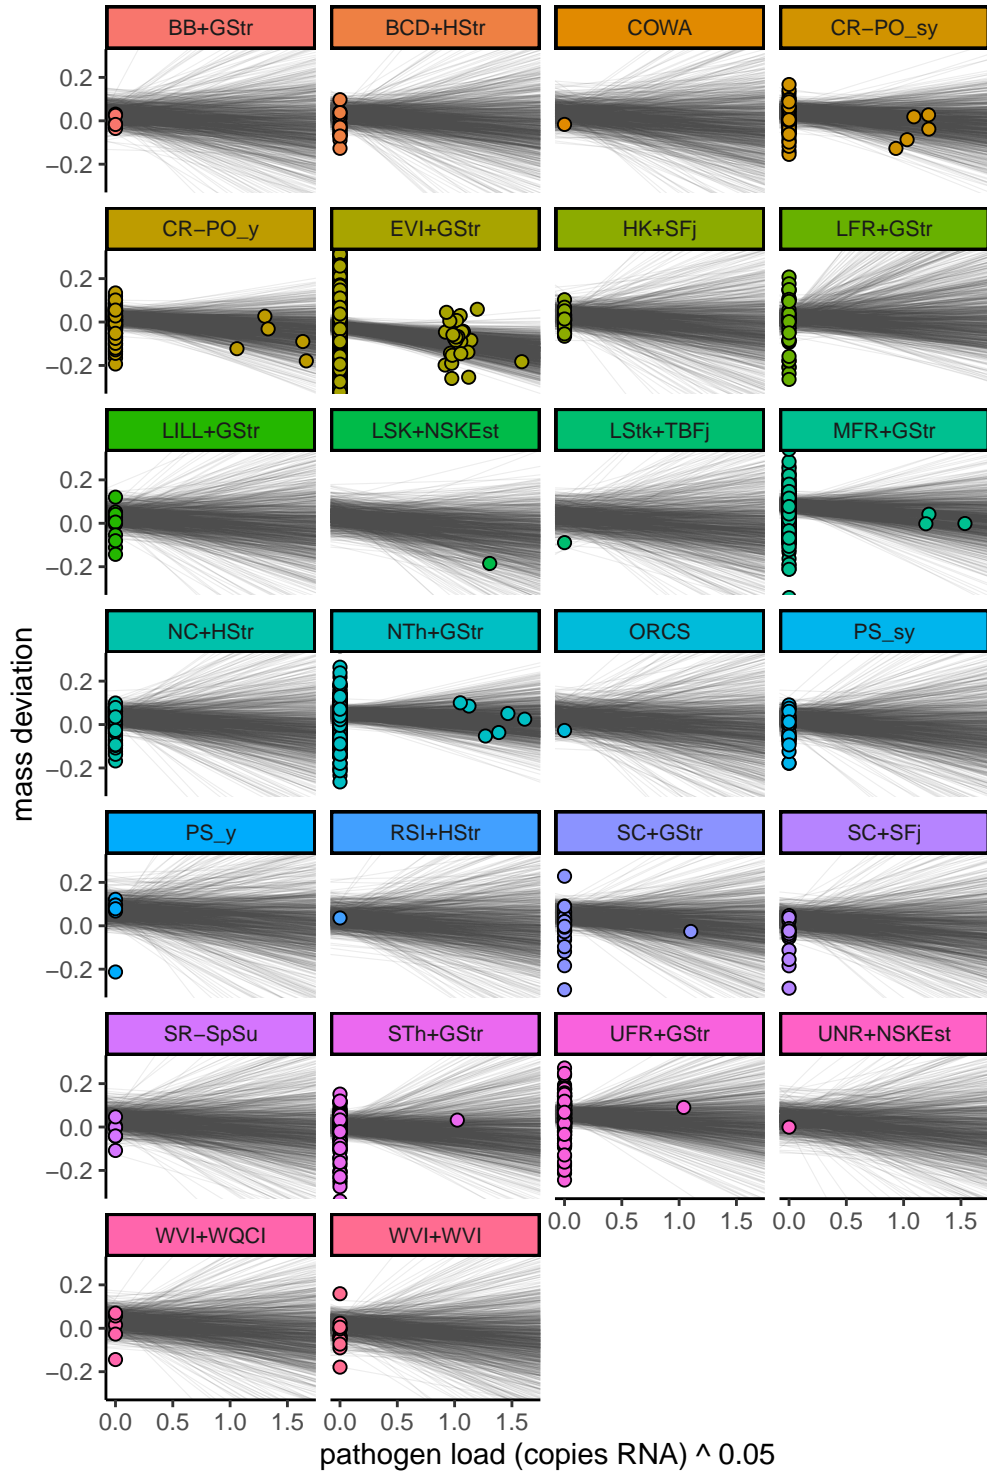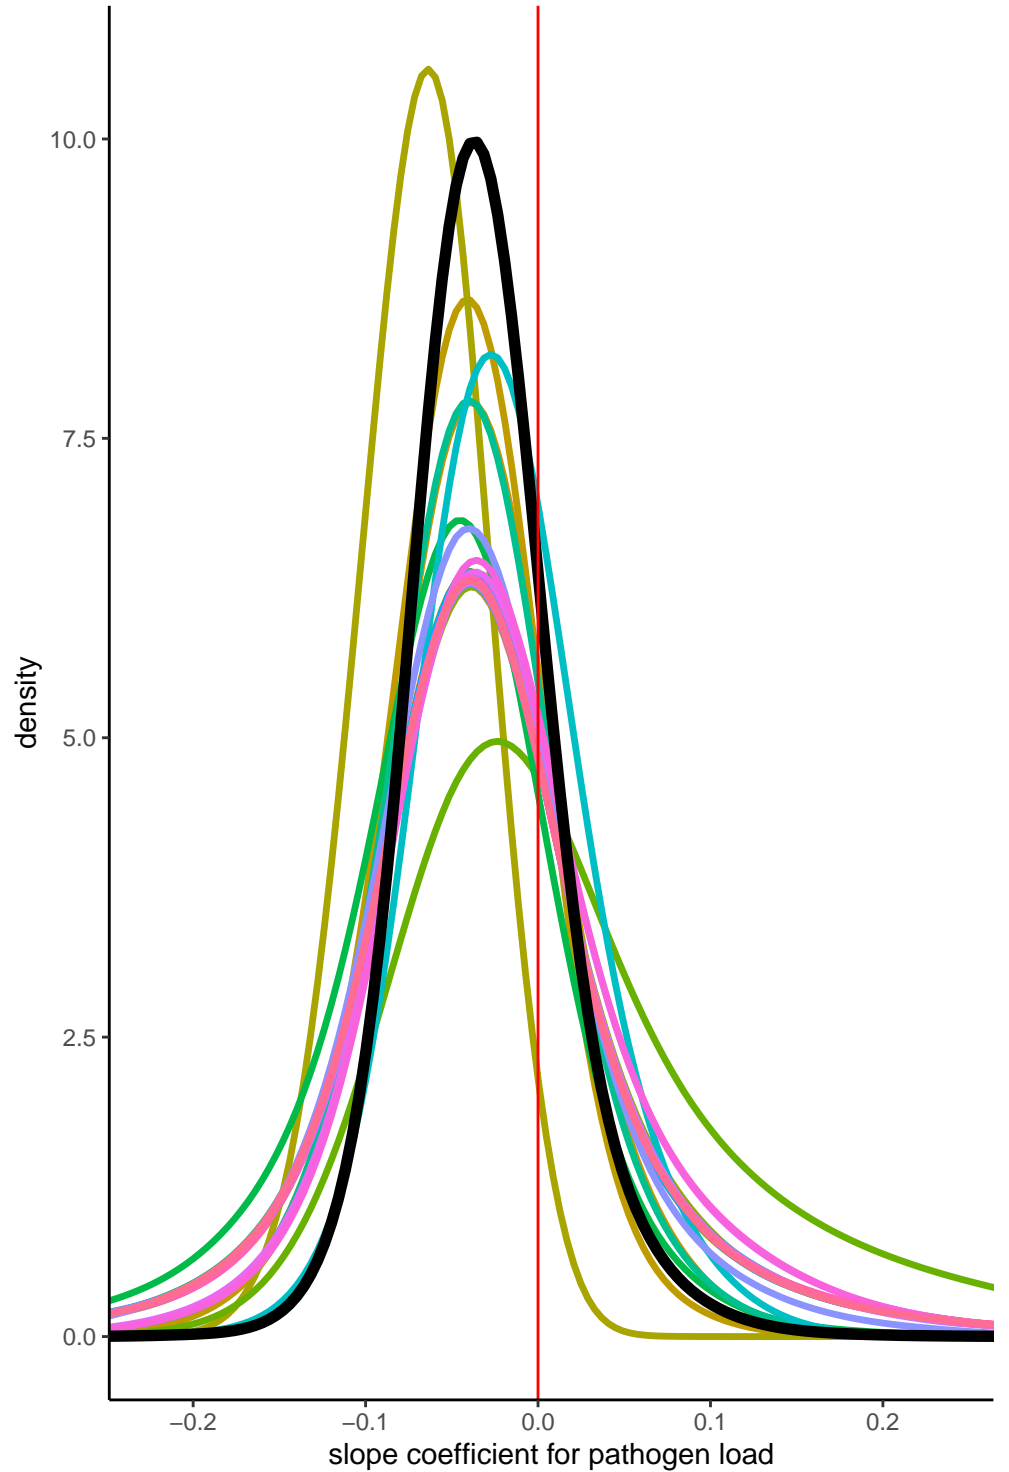

Rickettsia-like Organism SpSu

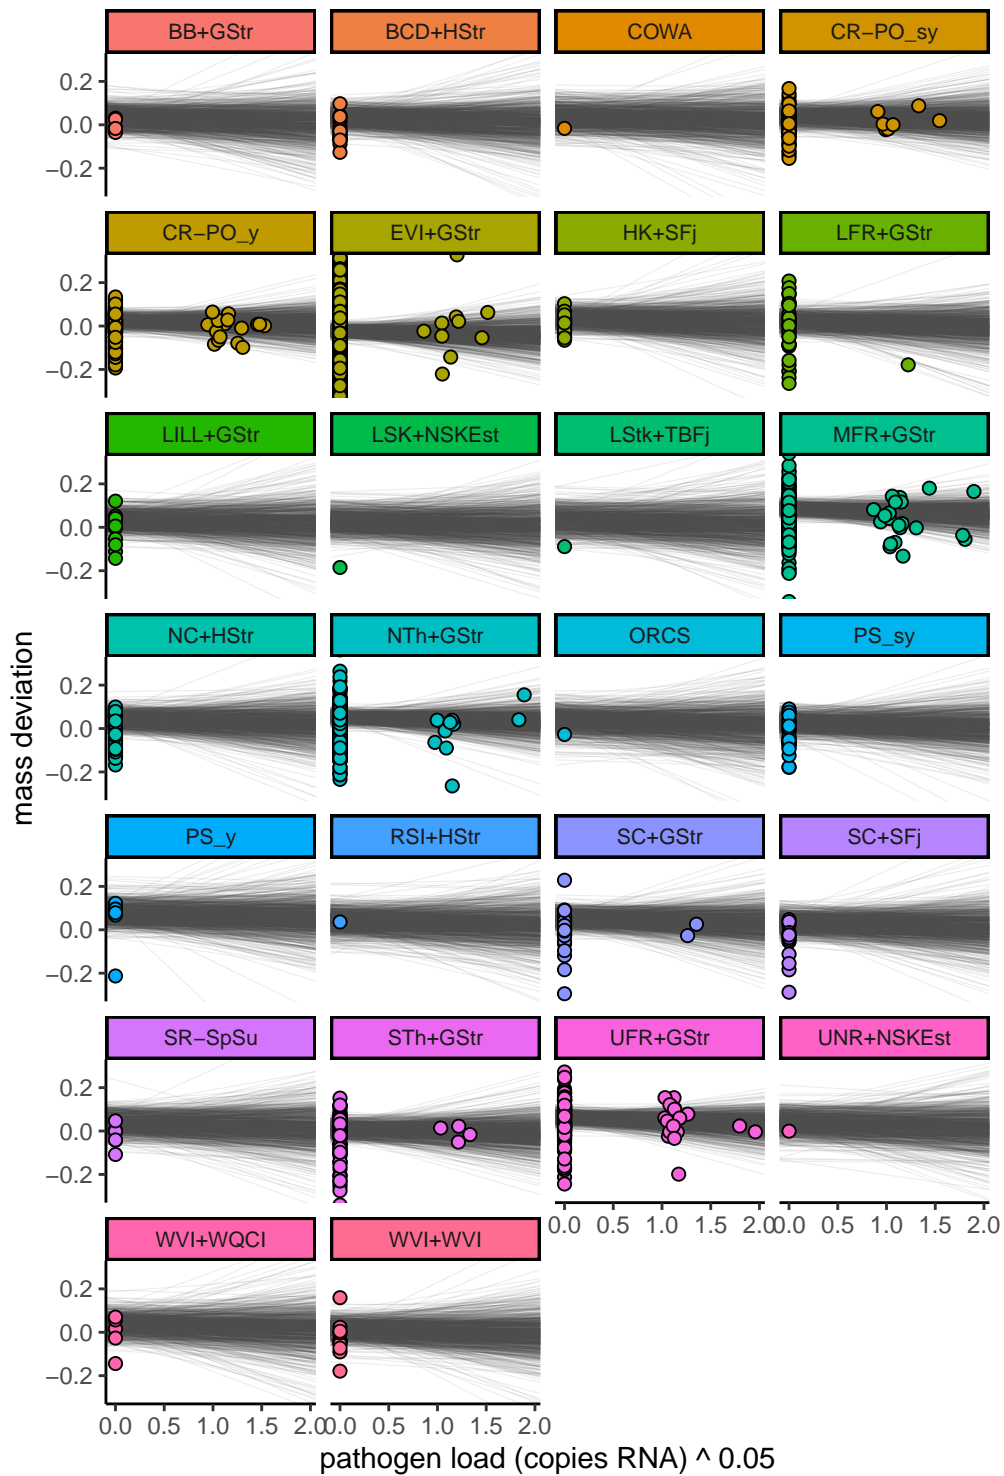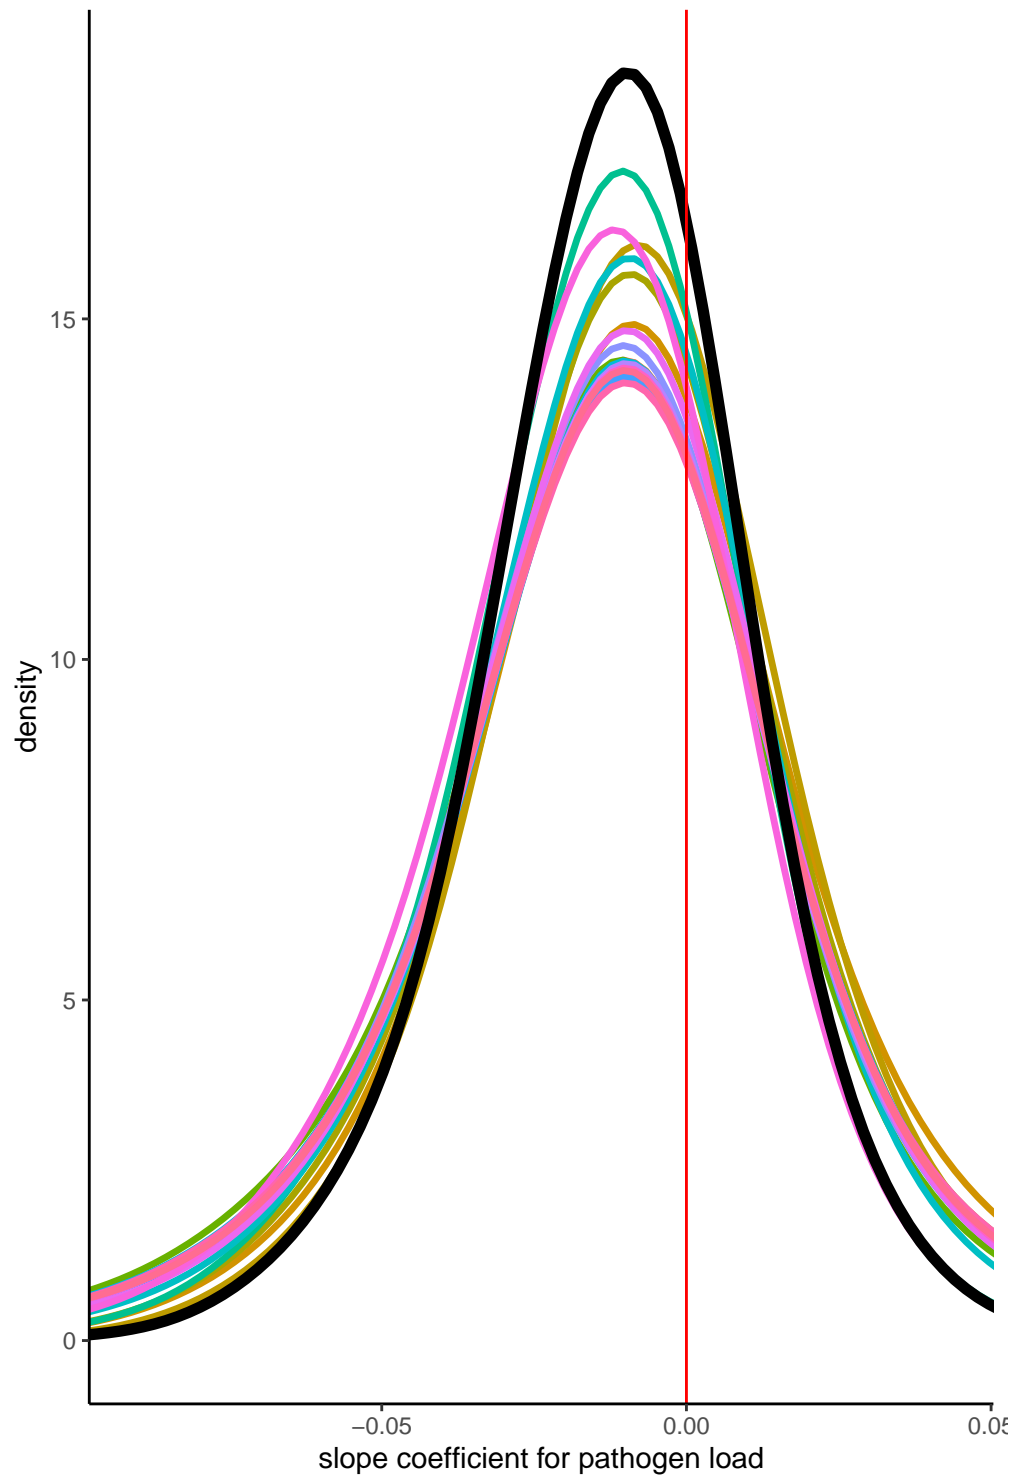

Rickettsia-like Organism FaWi

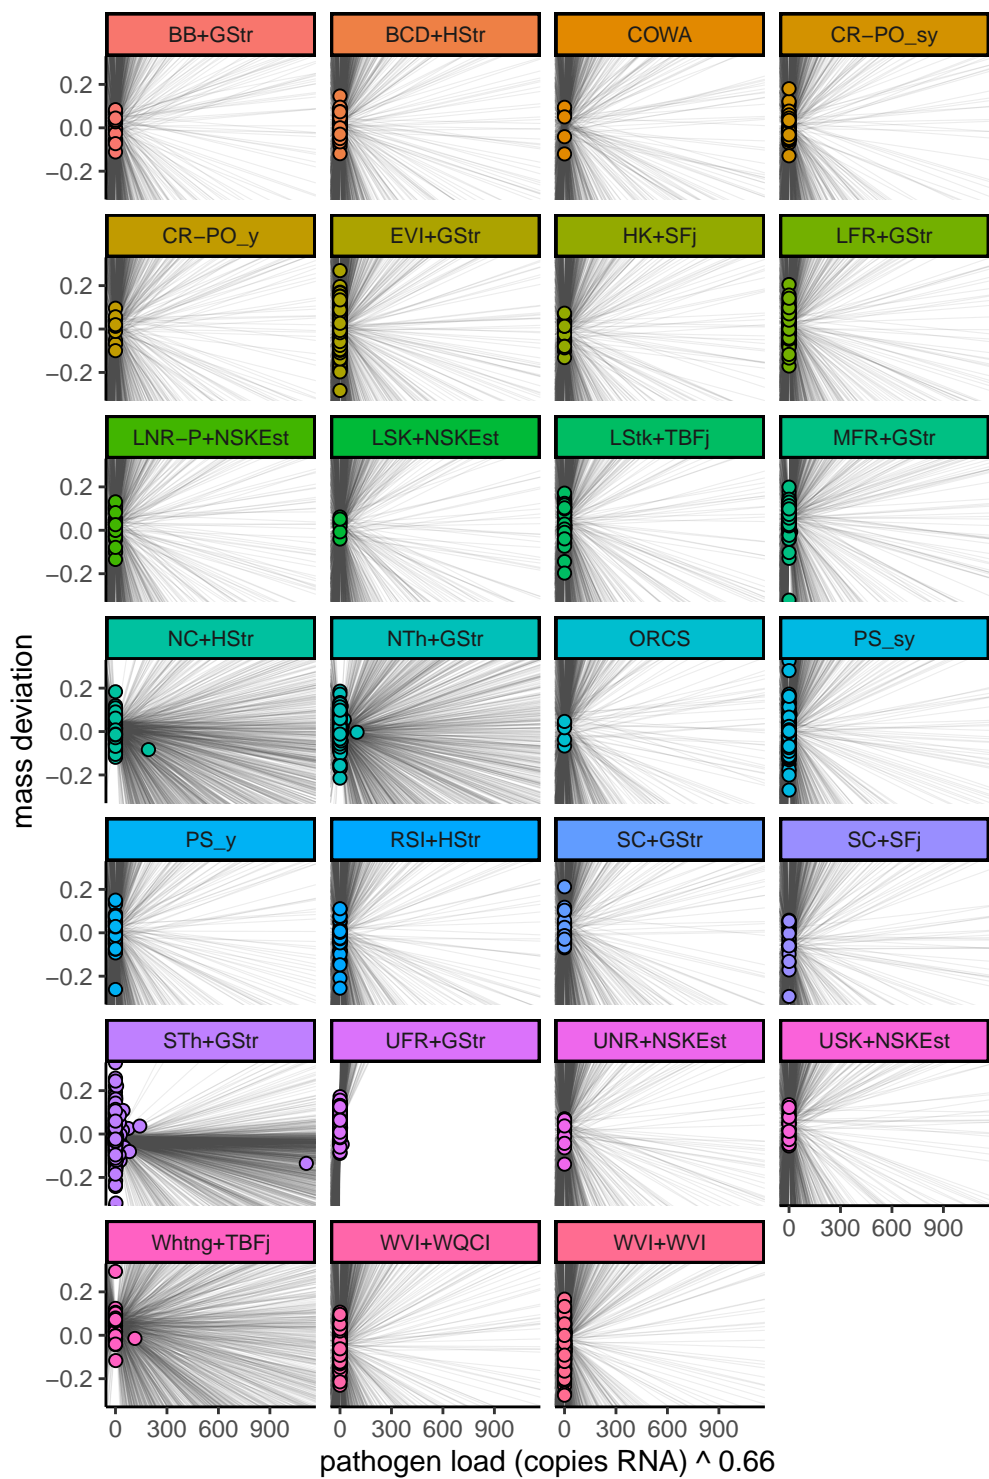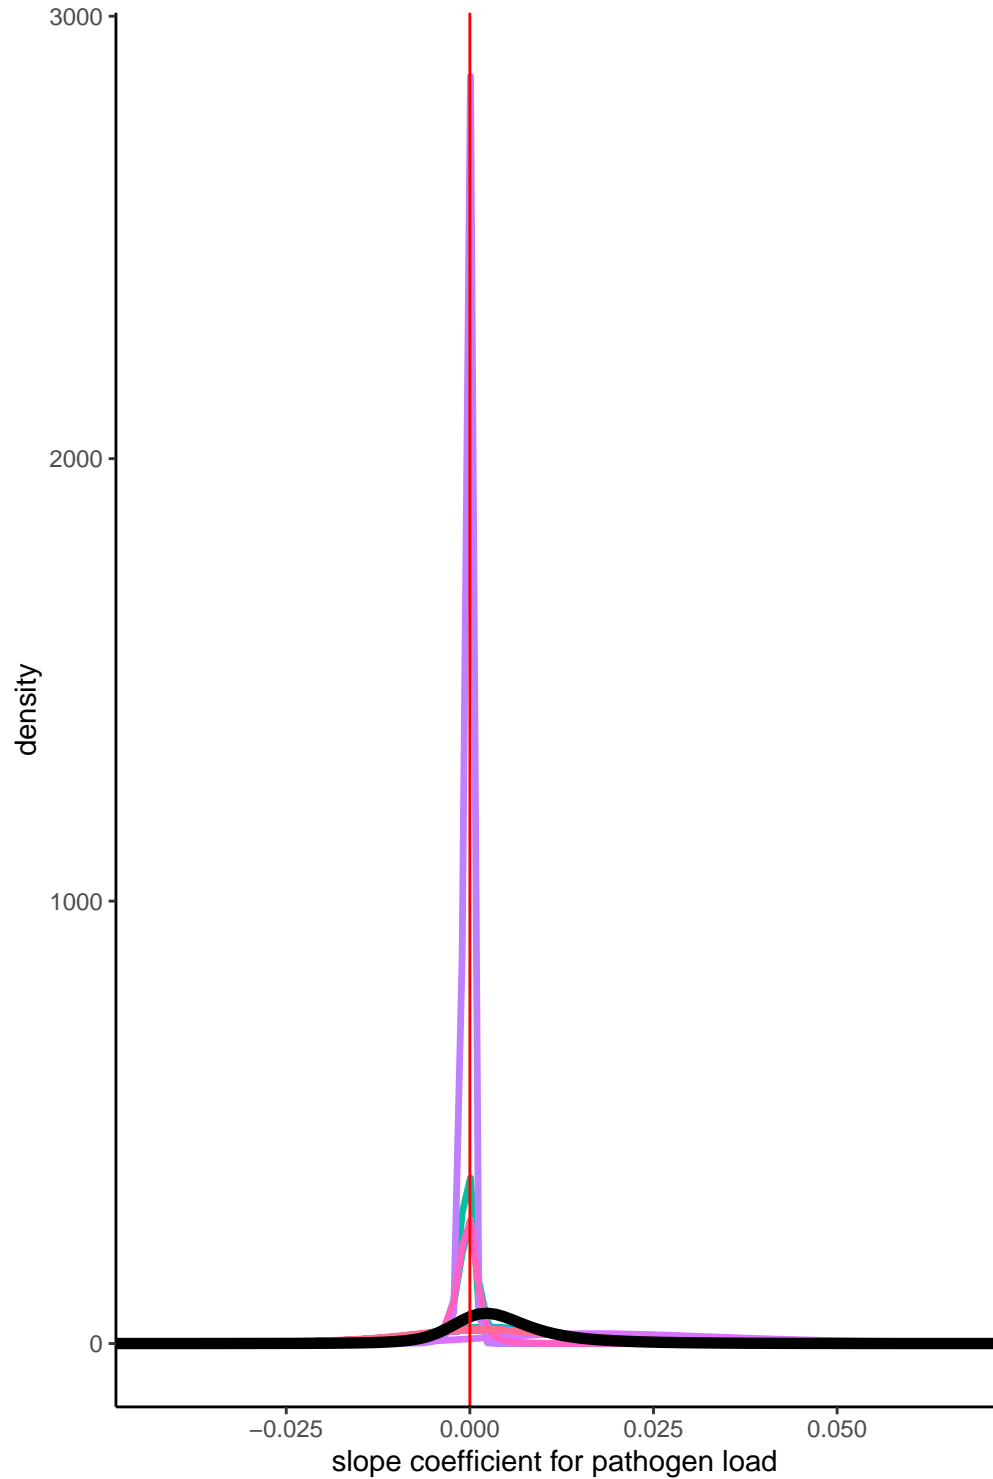



Candidatus *Syngnamydia salmonis* SpSu

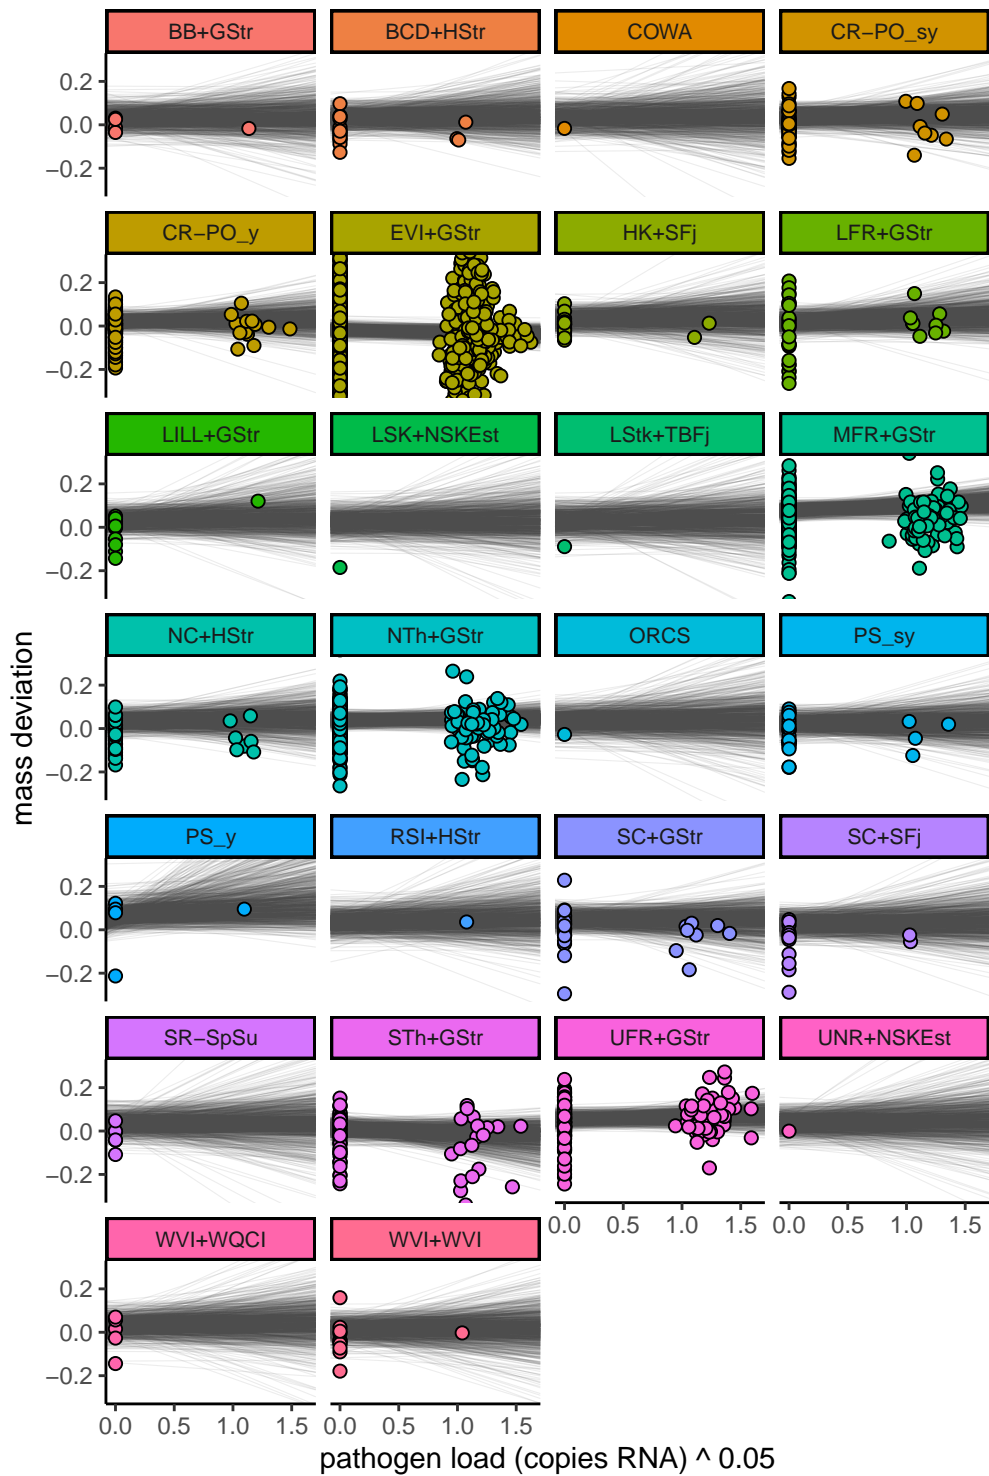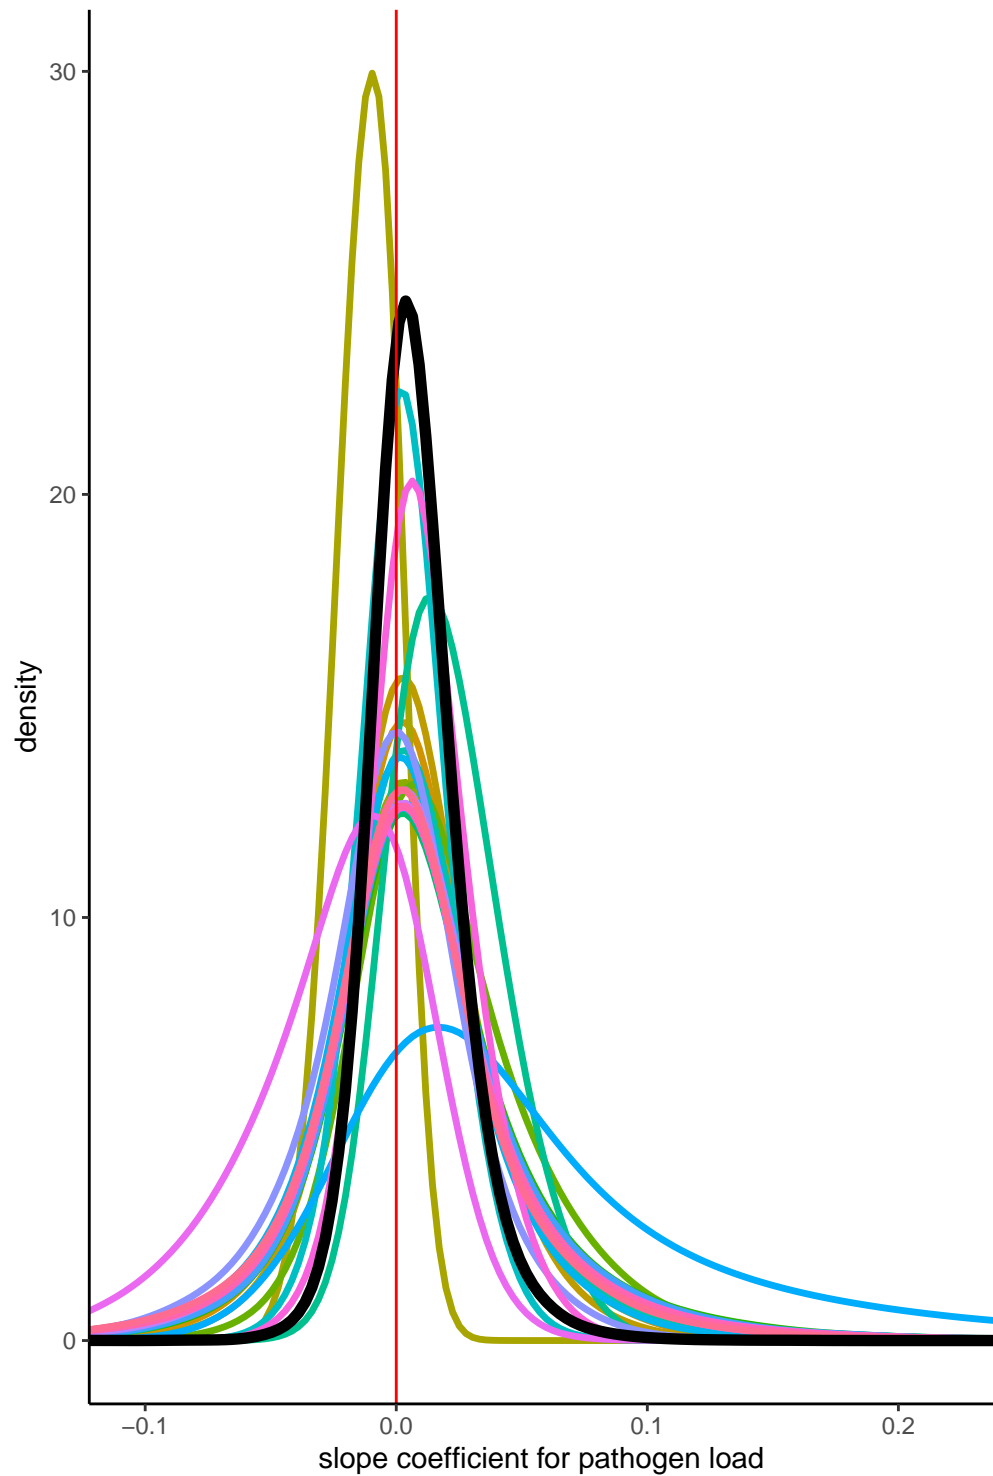

Candidatus *Syngnamydia salmonis* FaWi

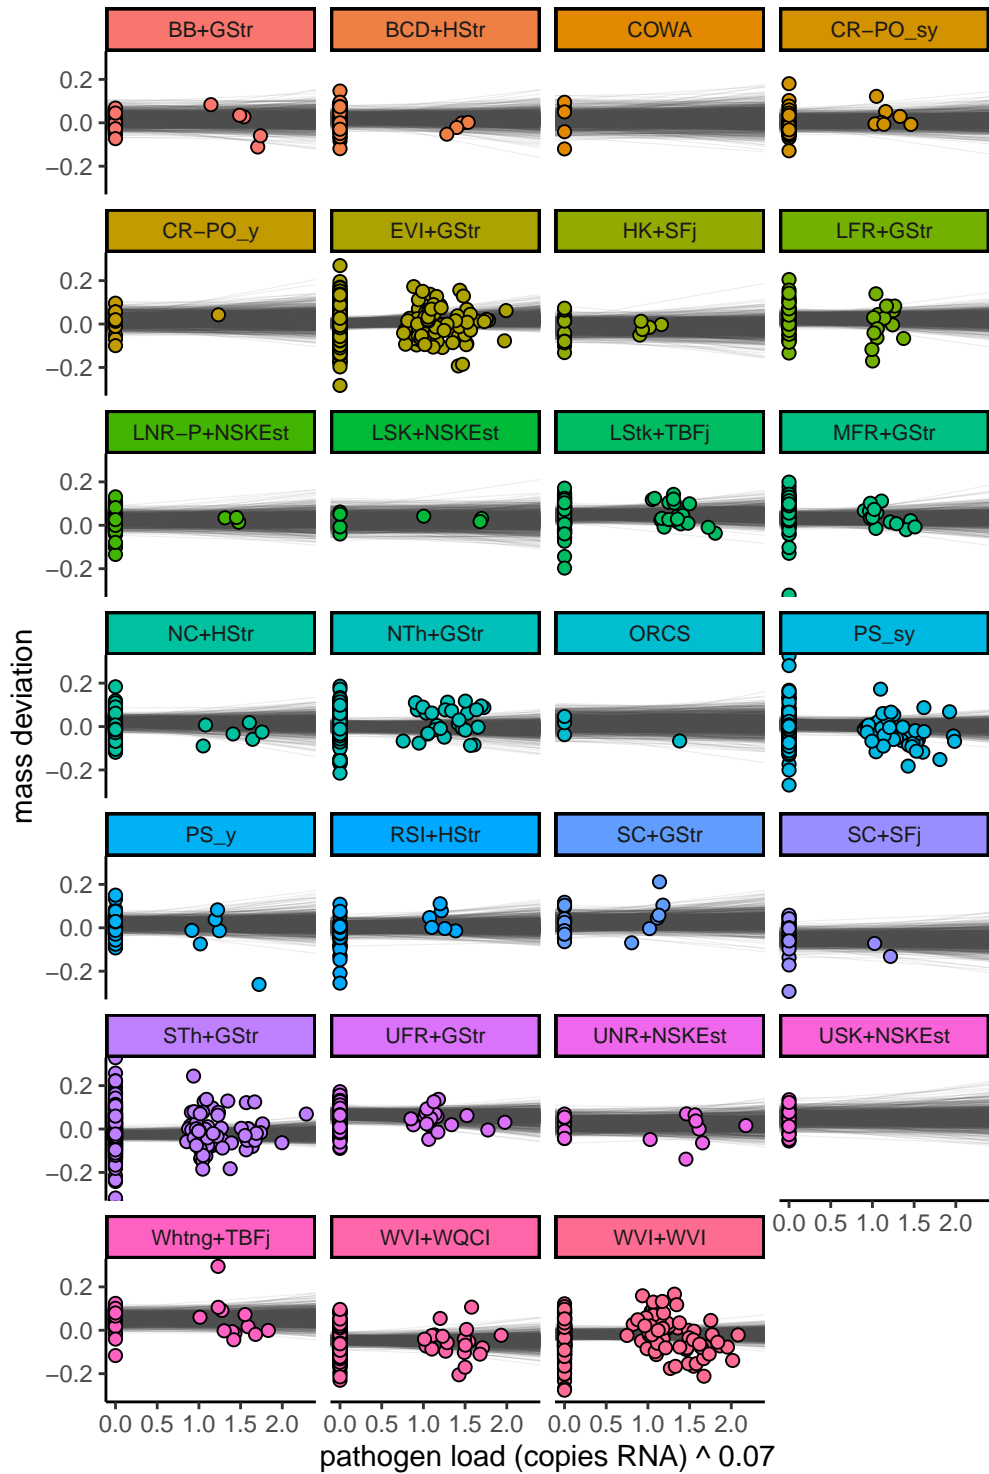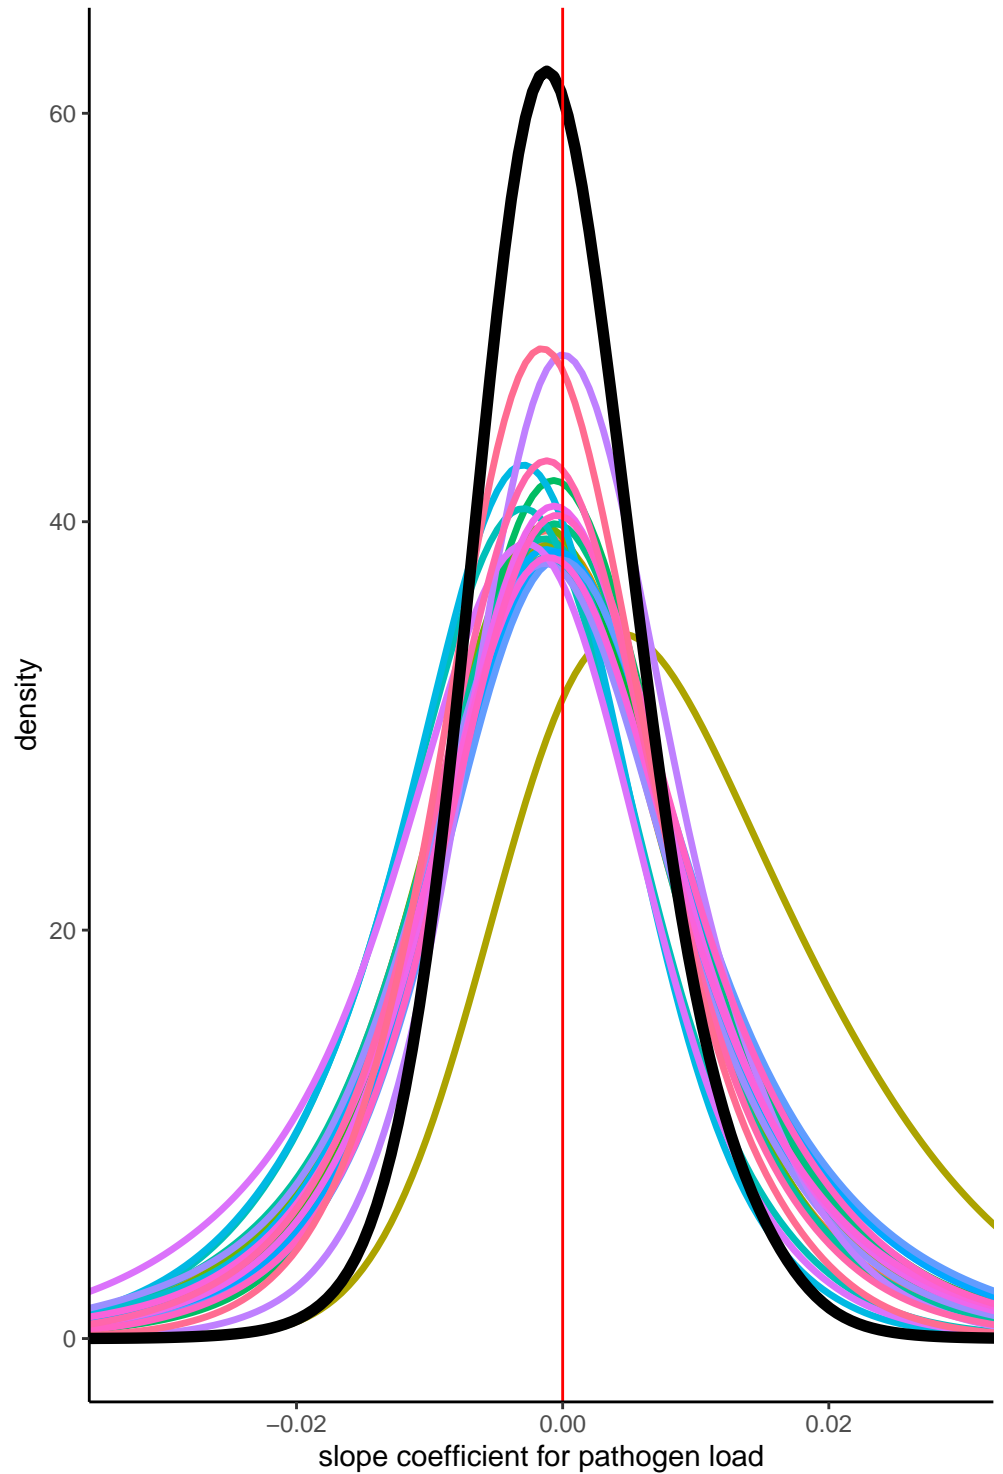

Putative RNA Virus 1 FaWi

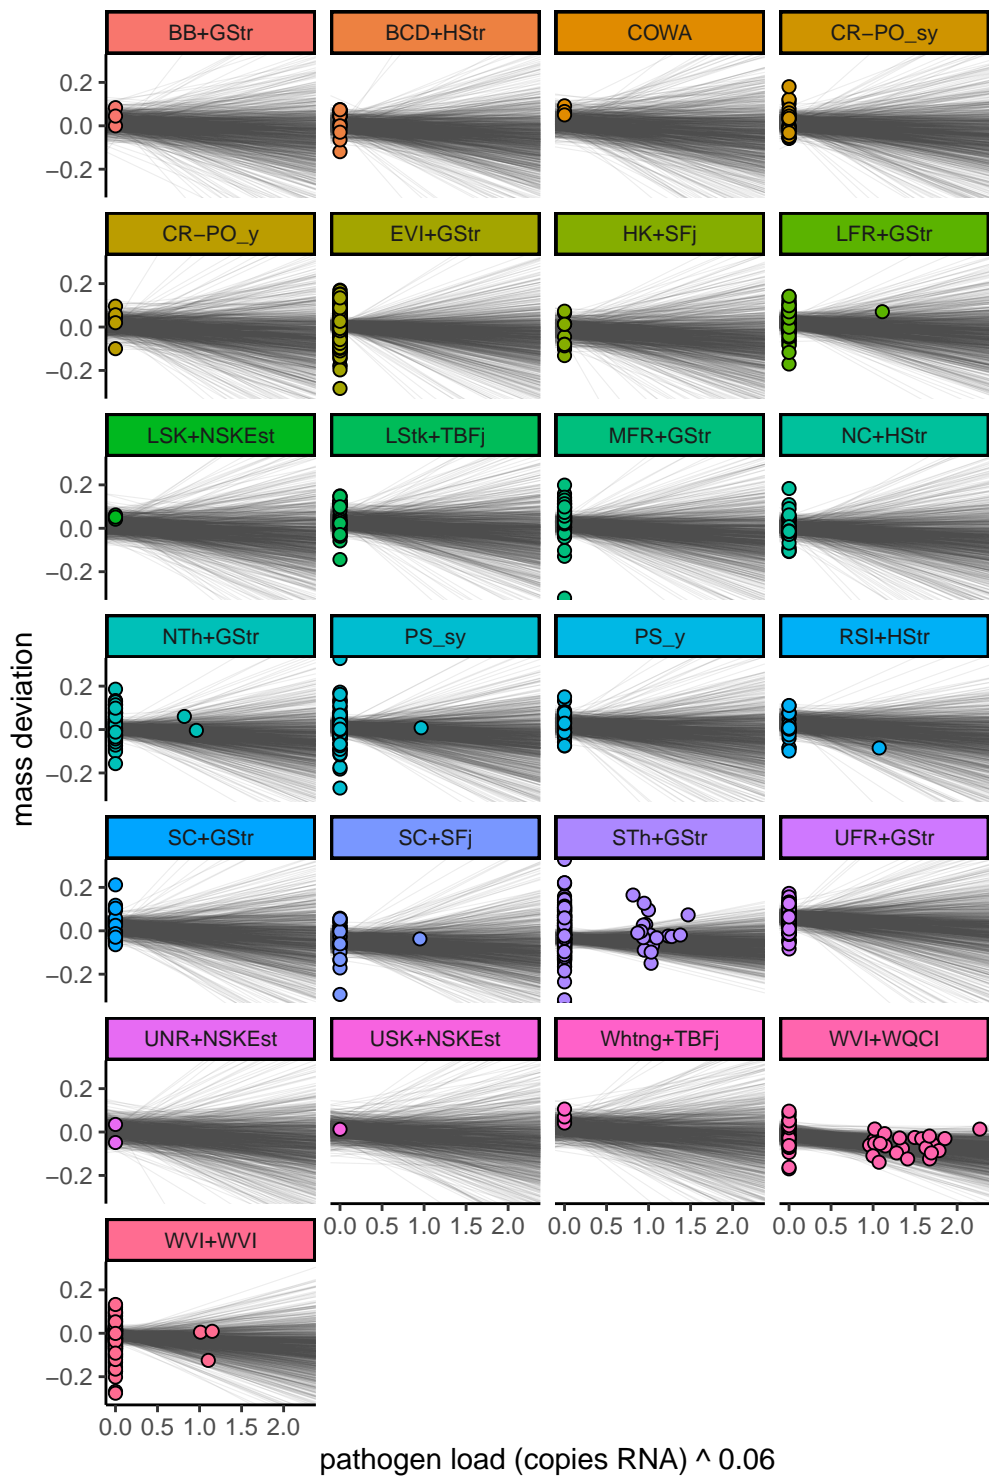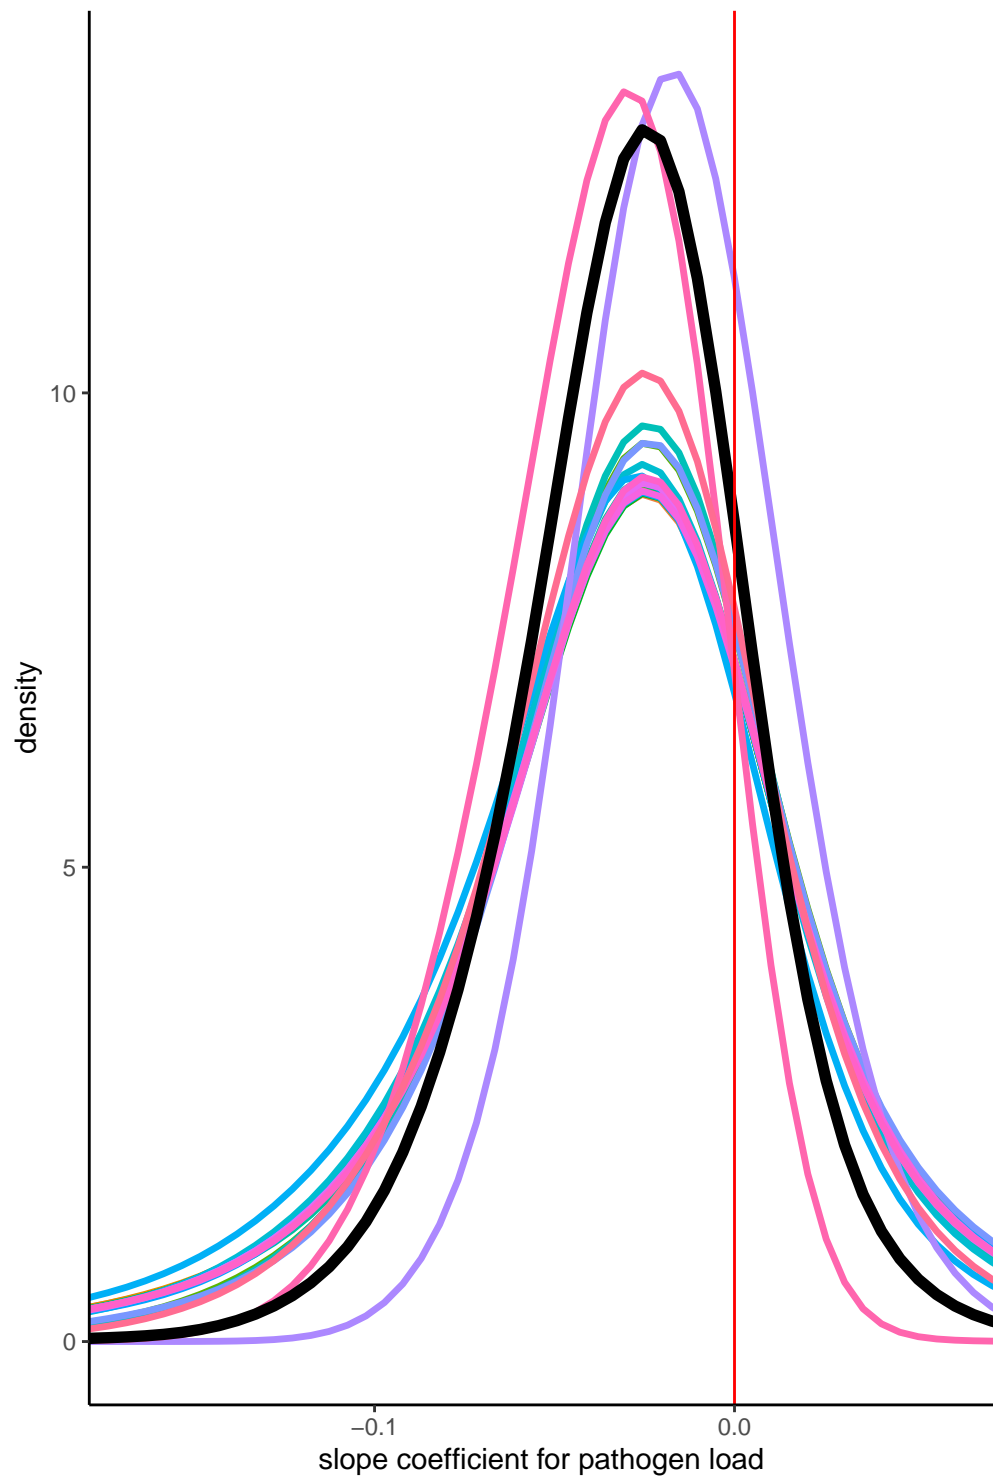

Sphaerothecum destruens SpSu

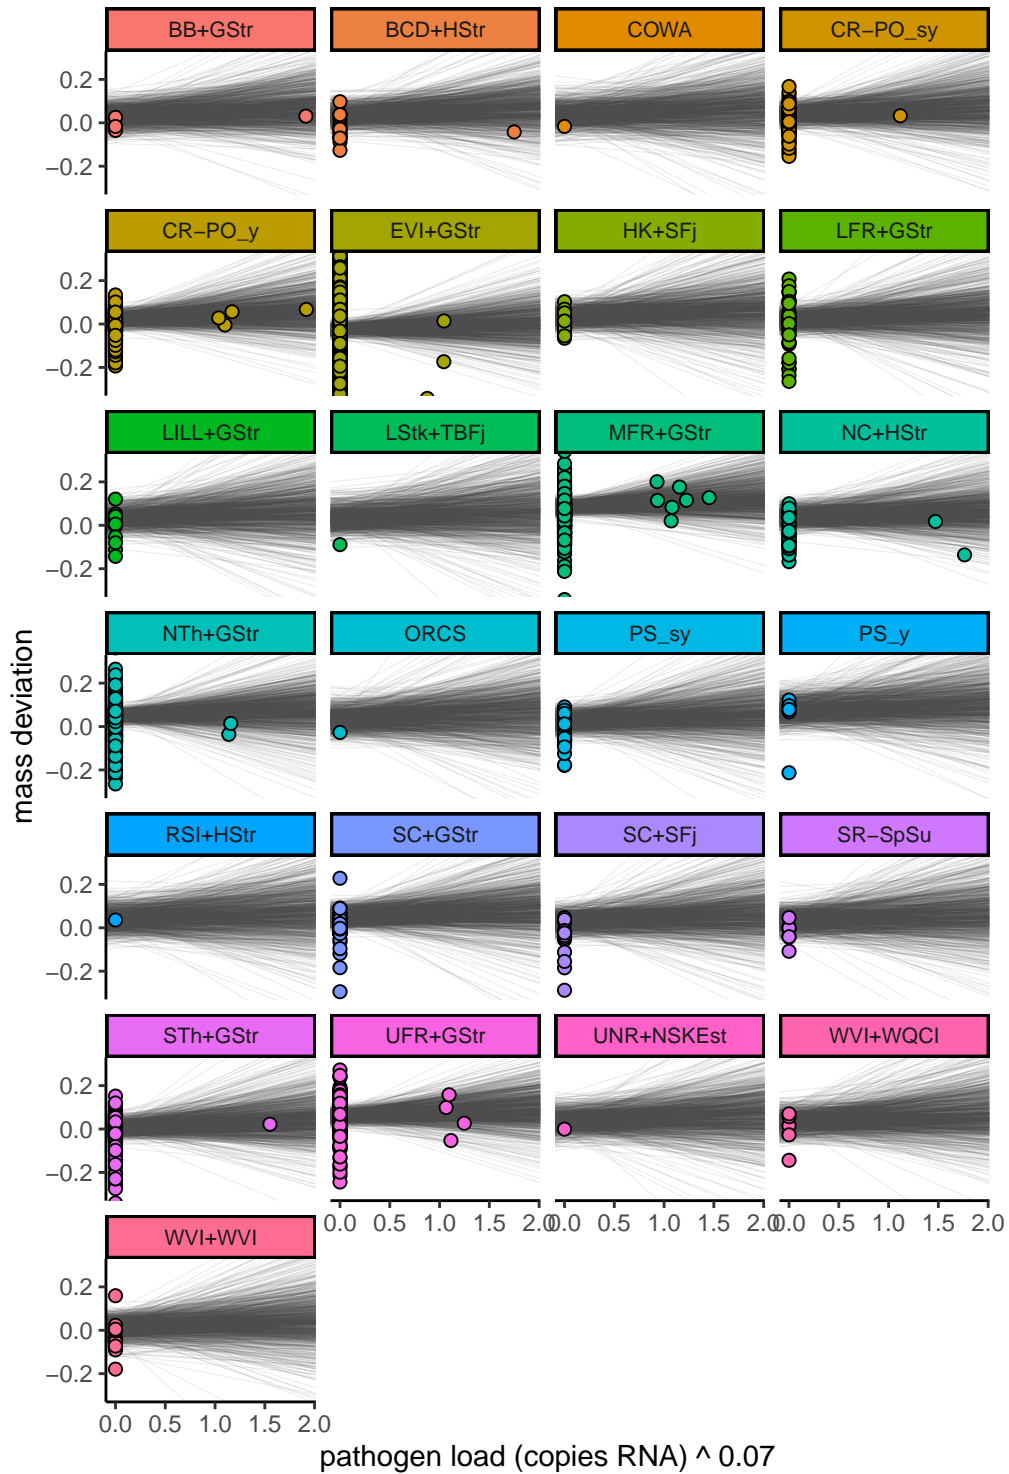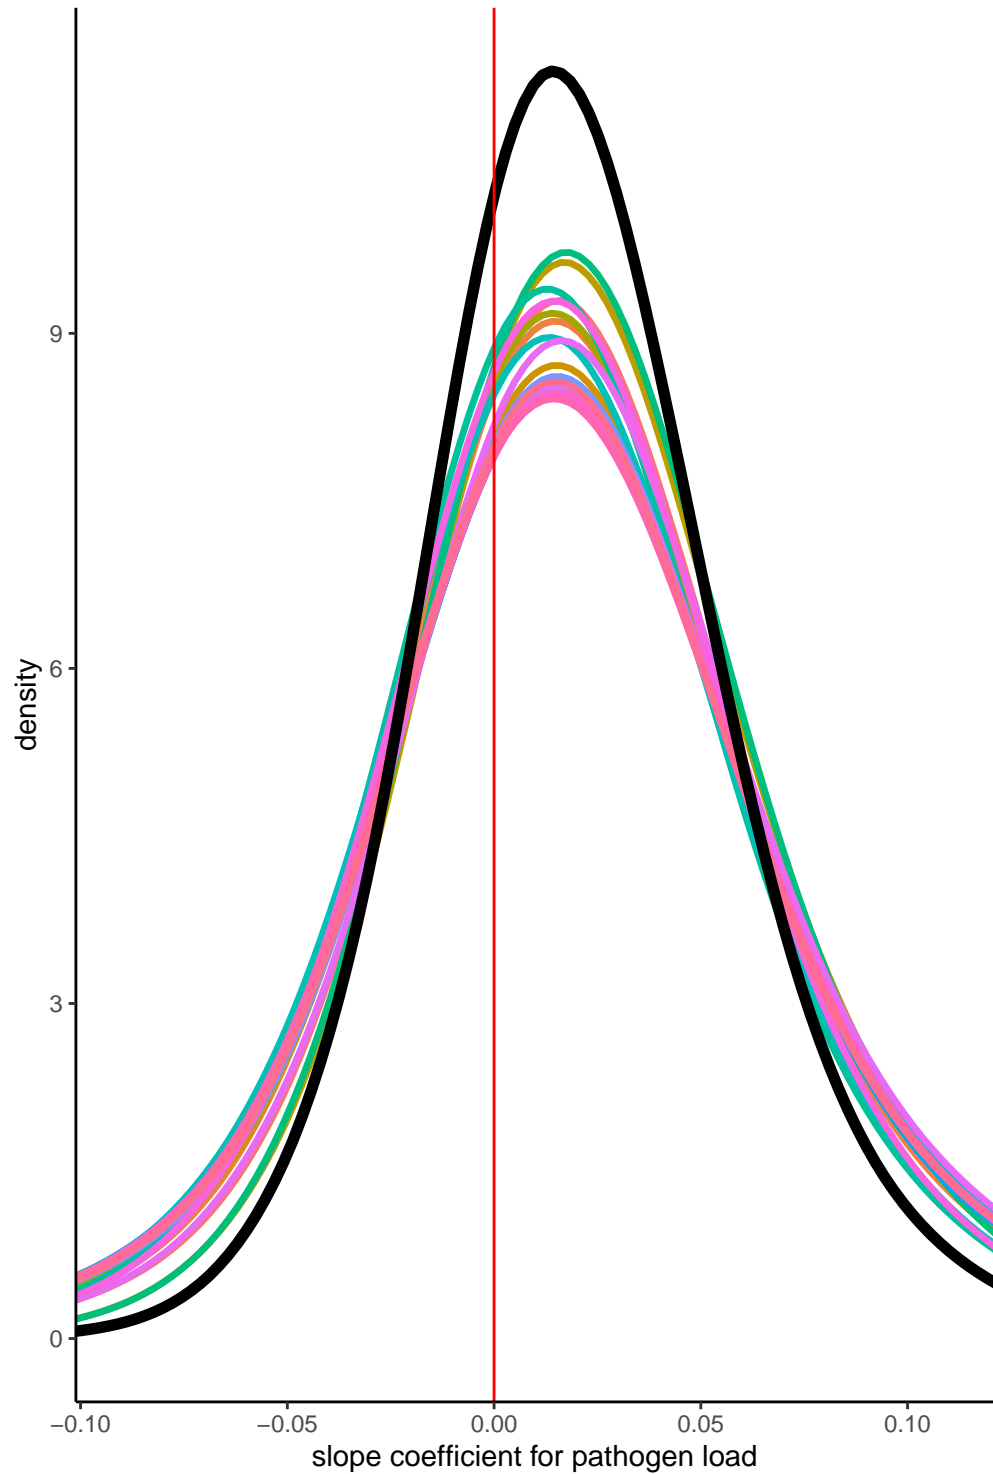

Sphaerothecum destruens FaWi

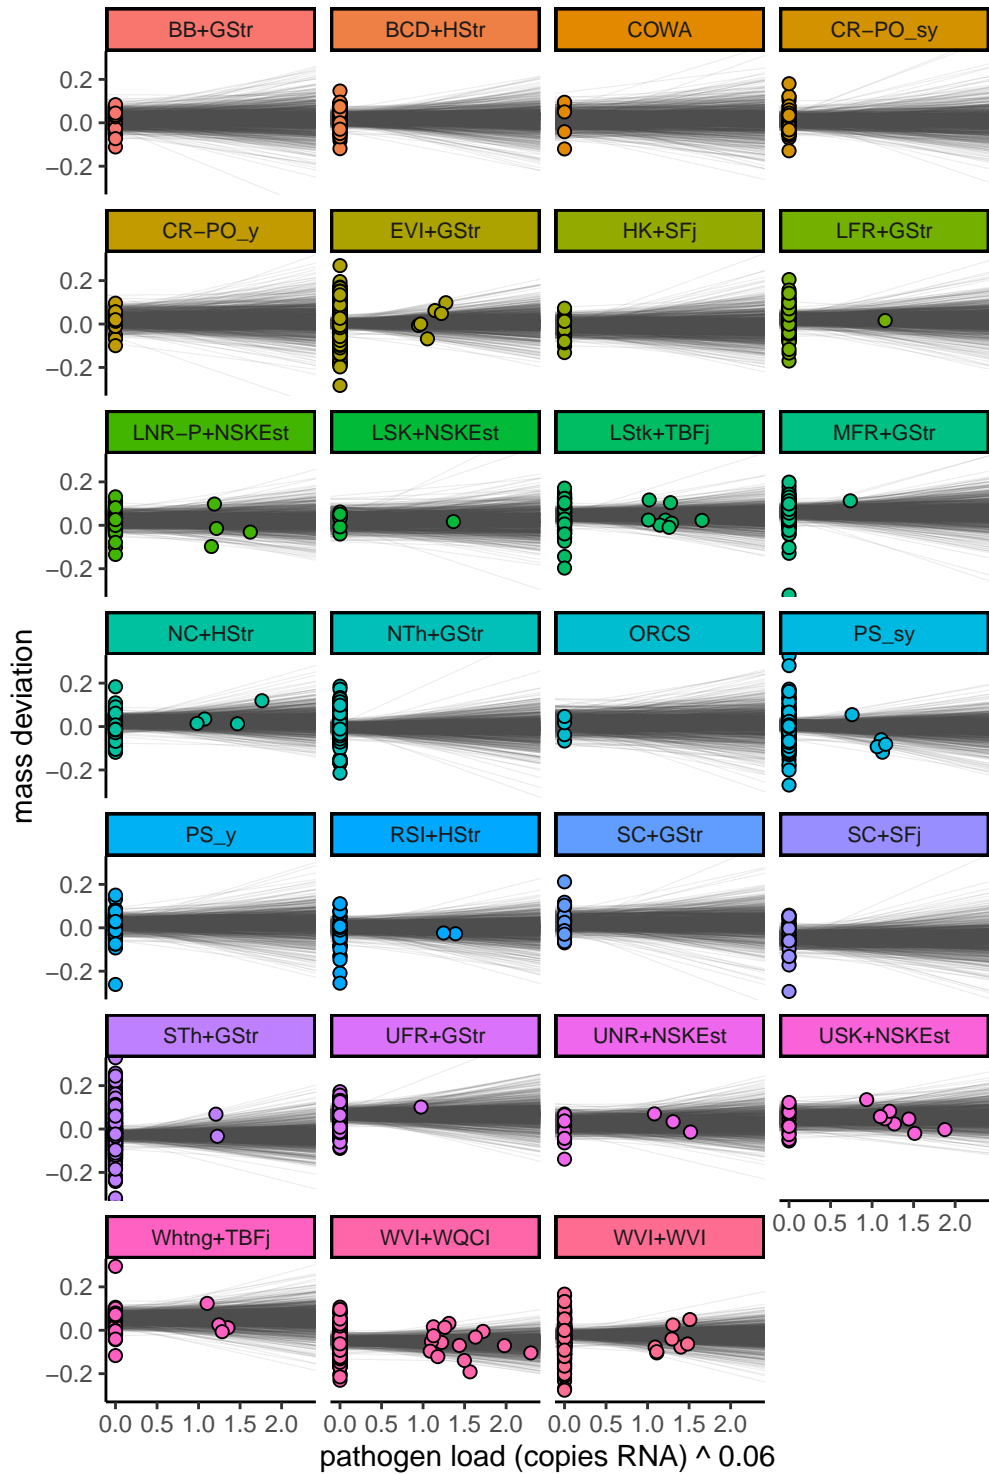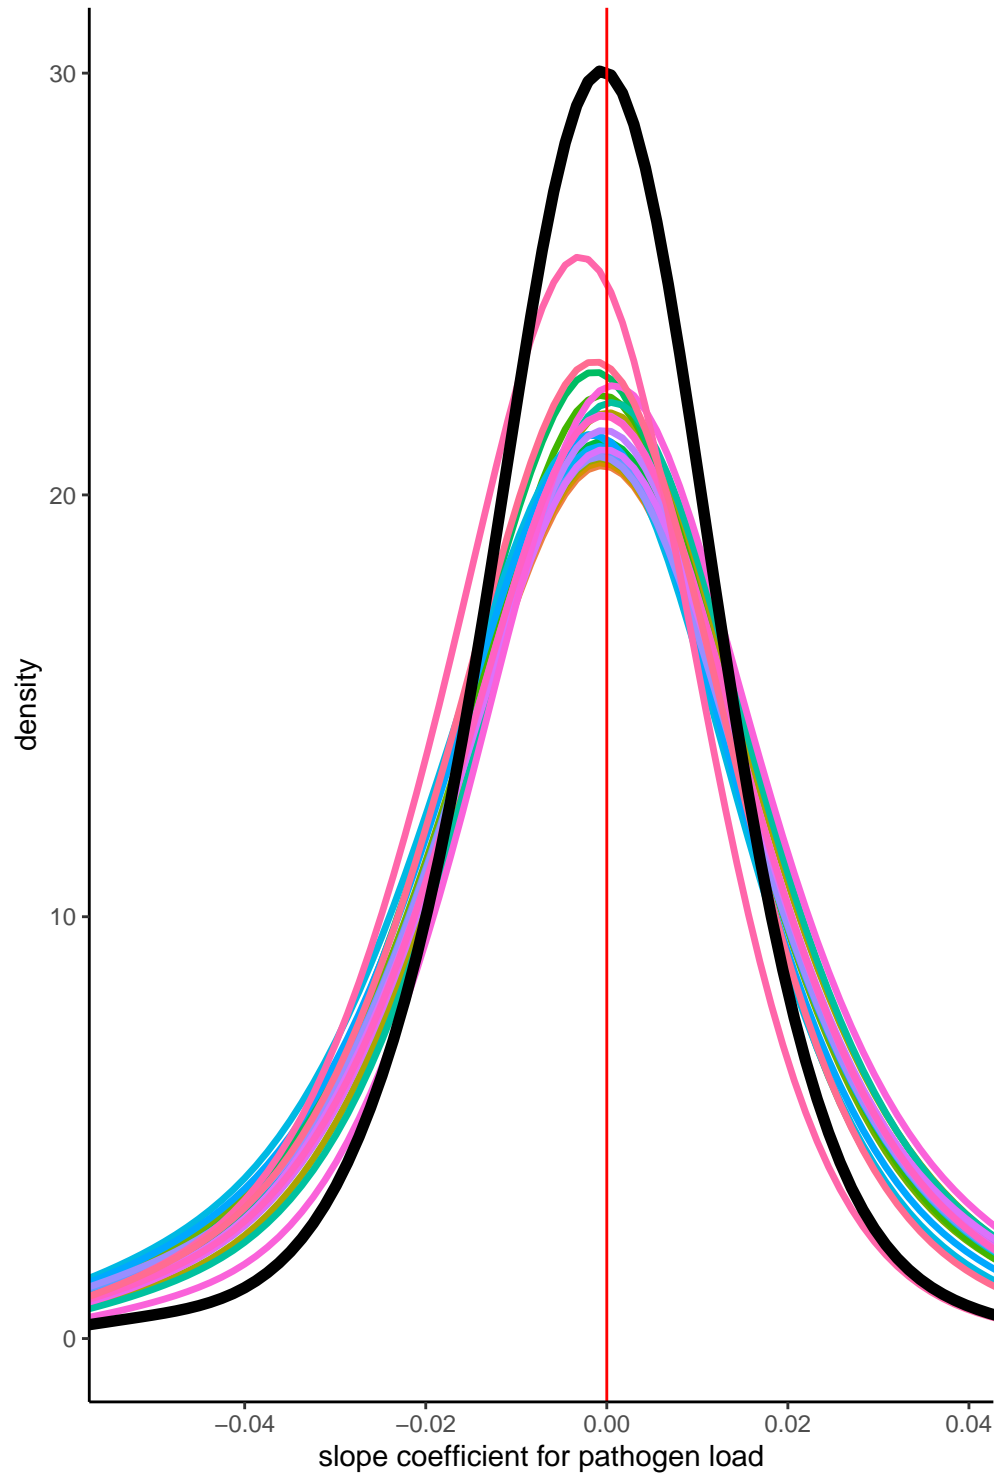

Tetracapsuloides bryosalmonae SpSu

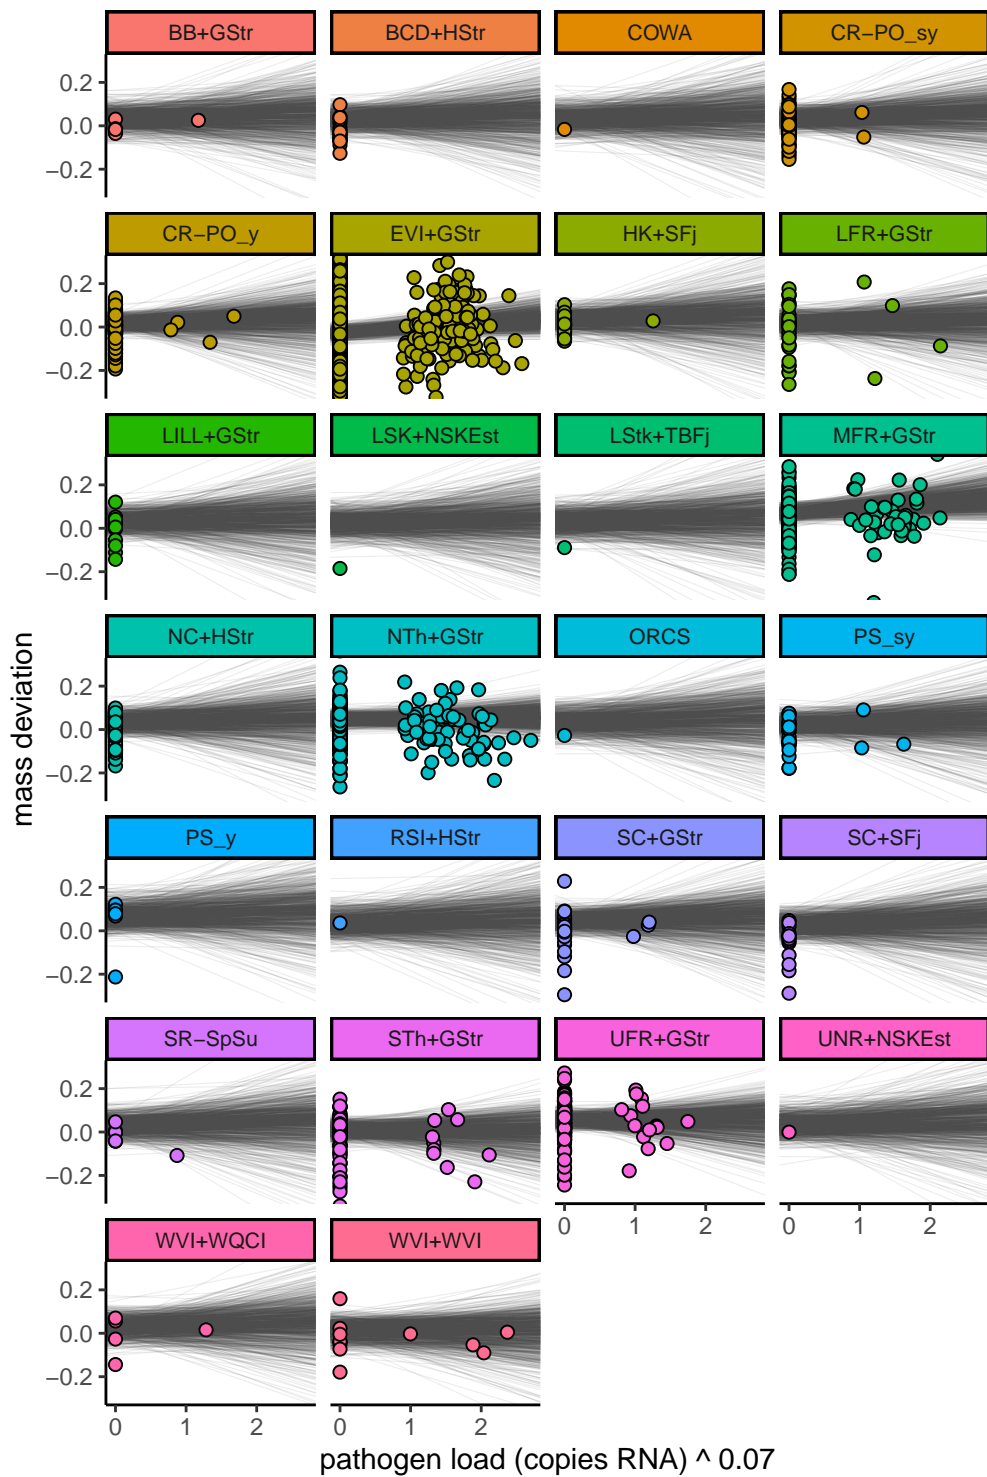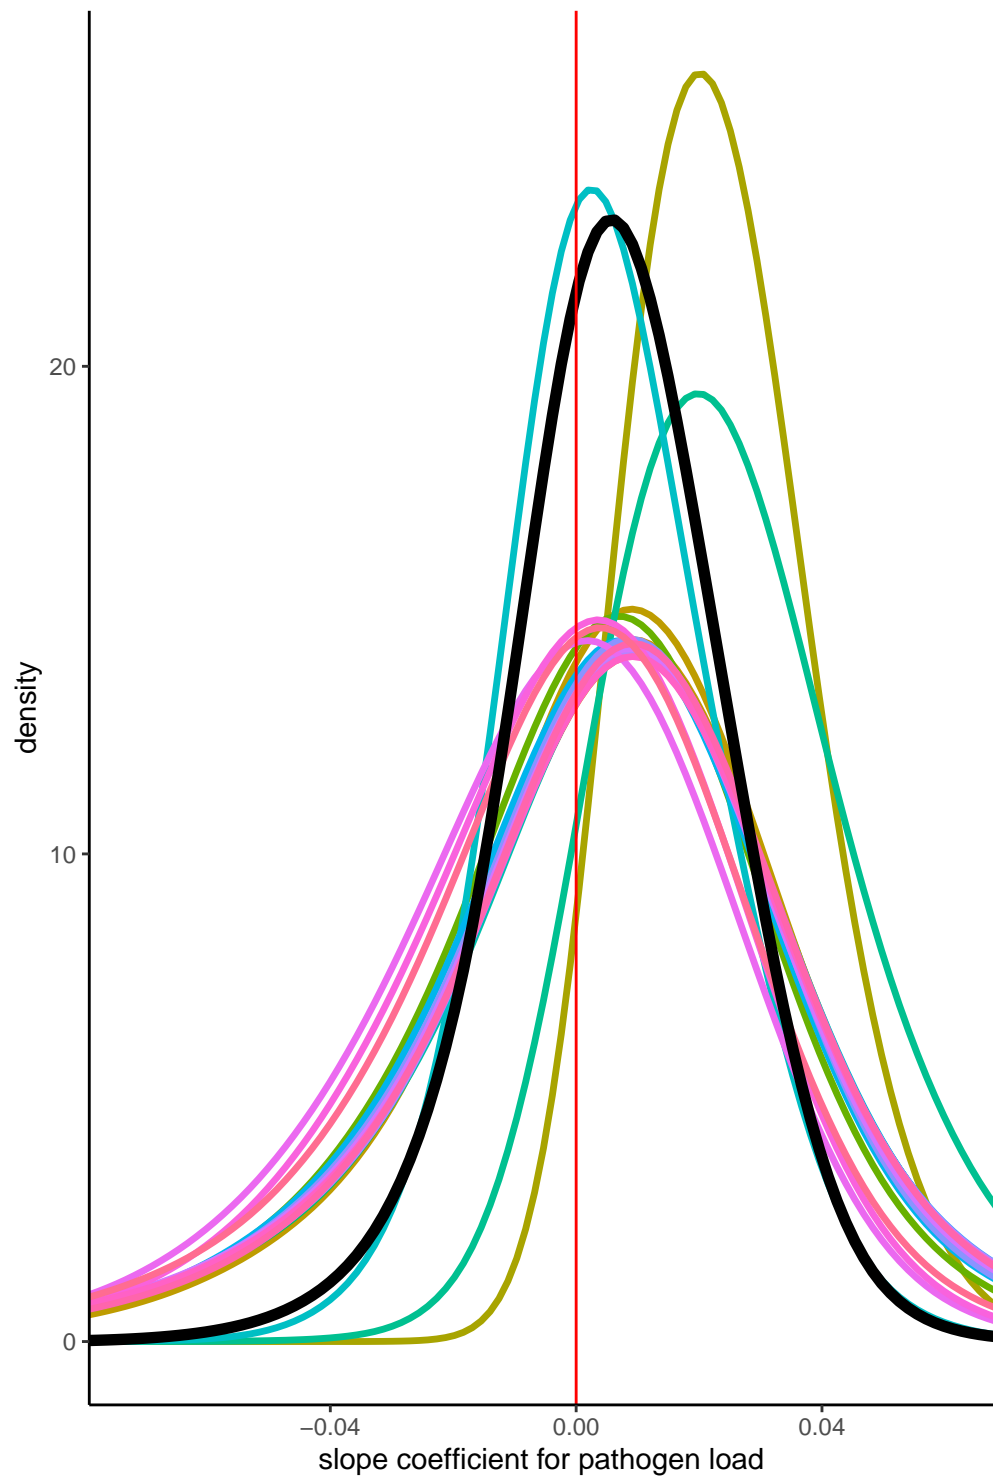

Tetracapsuloides bryosalmonae FaWi

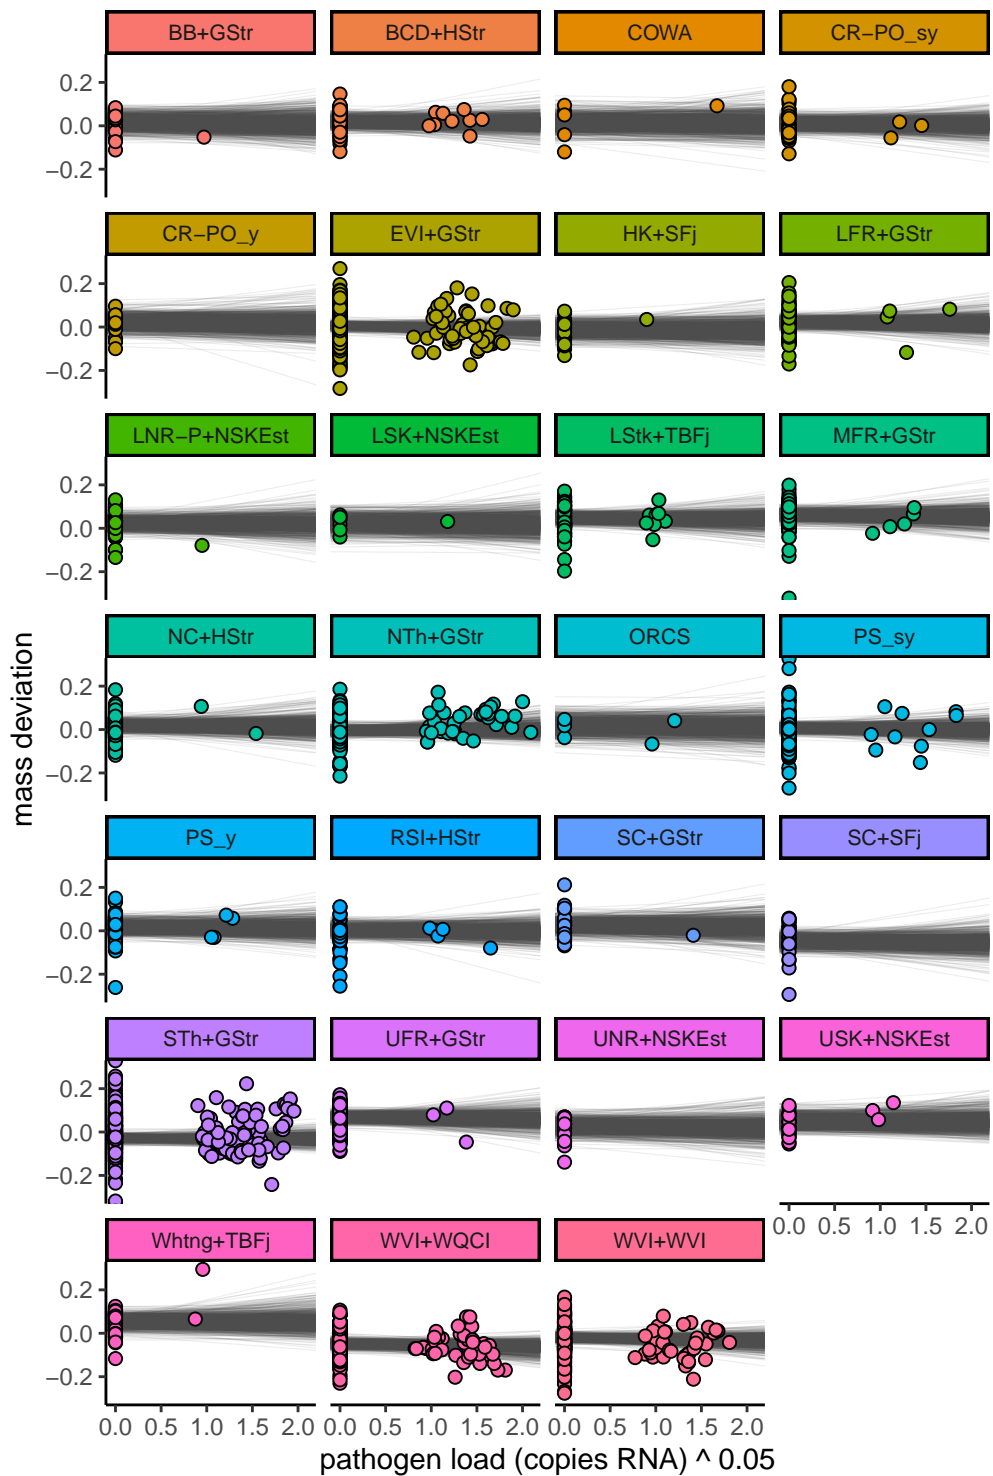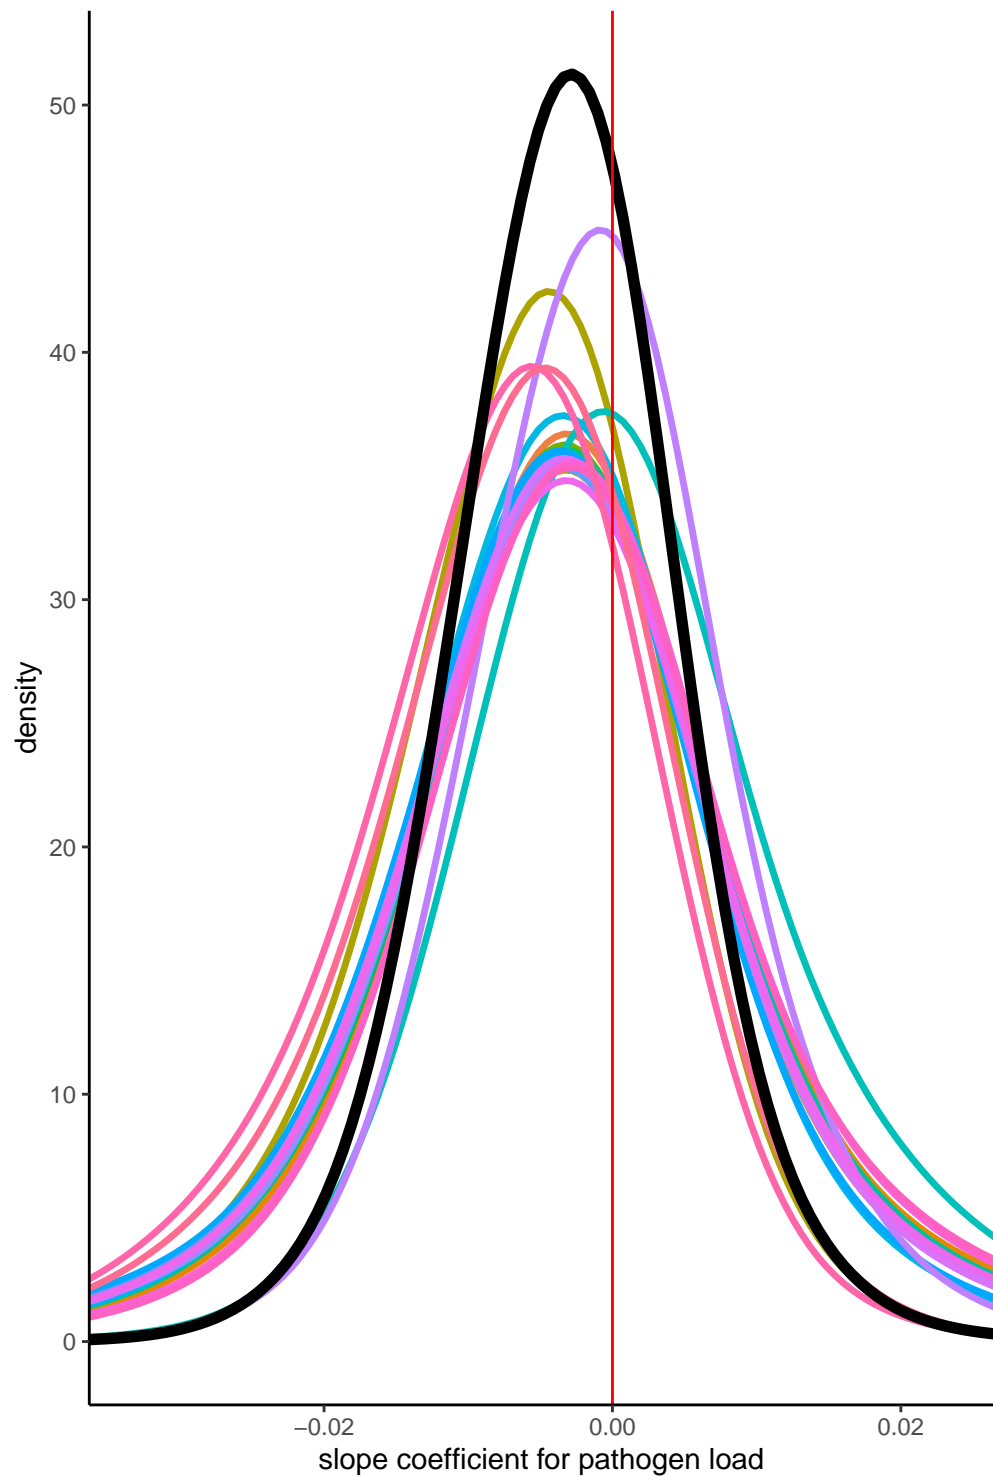

Tenacibaculum maritimum SpSu

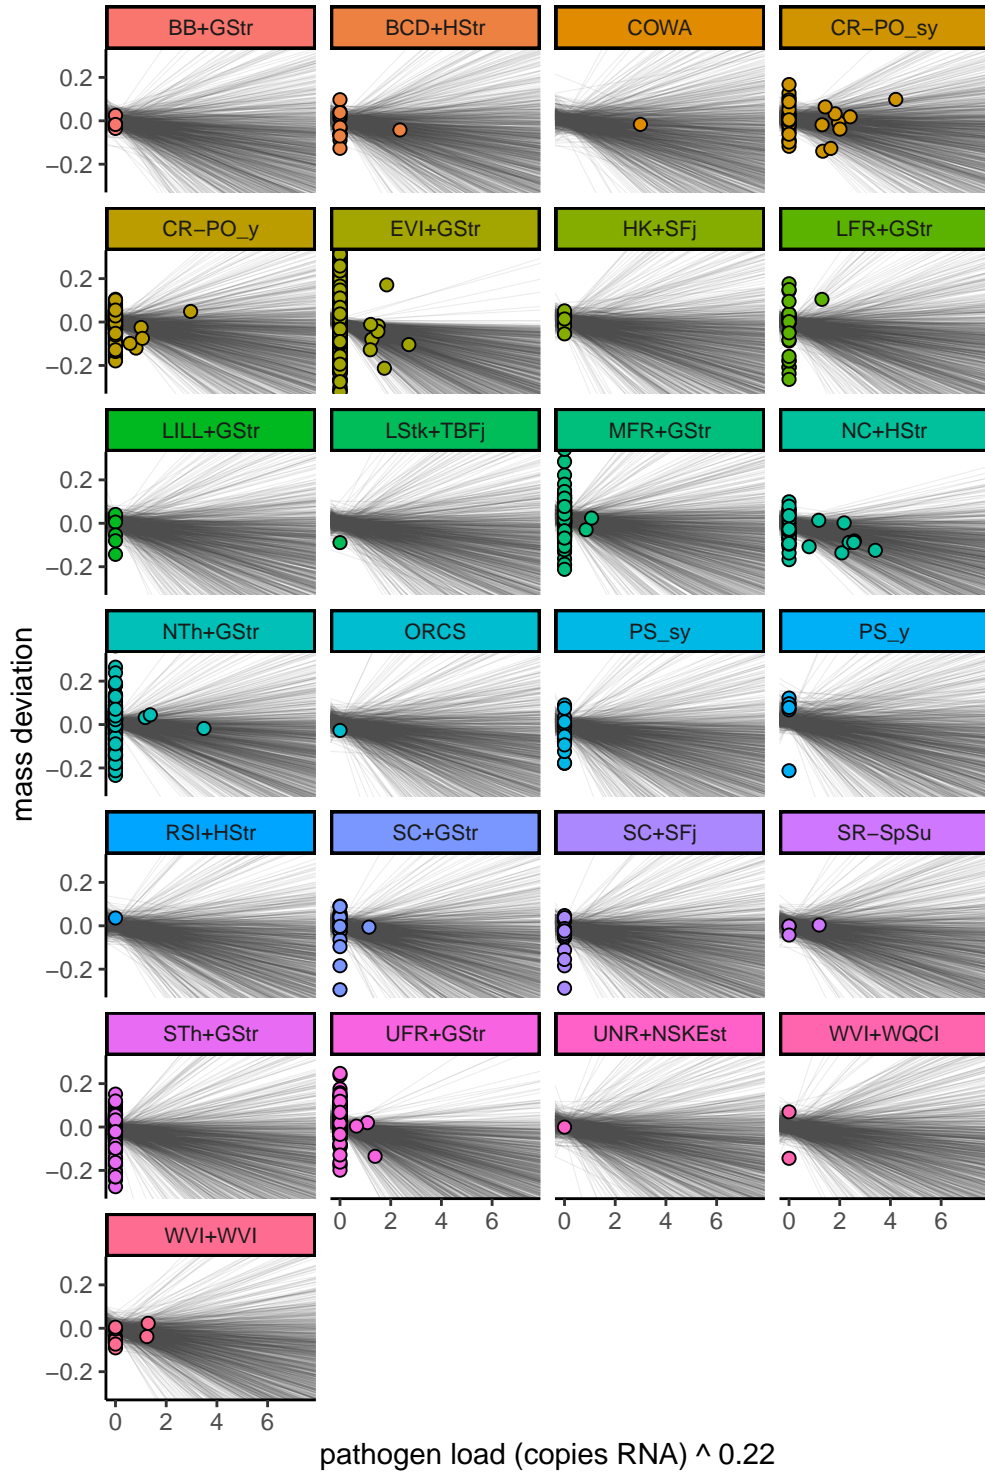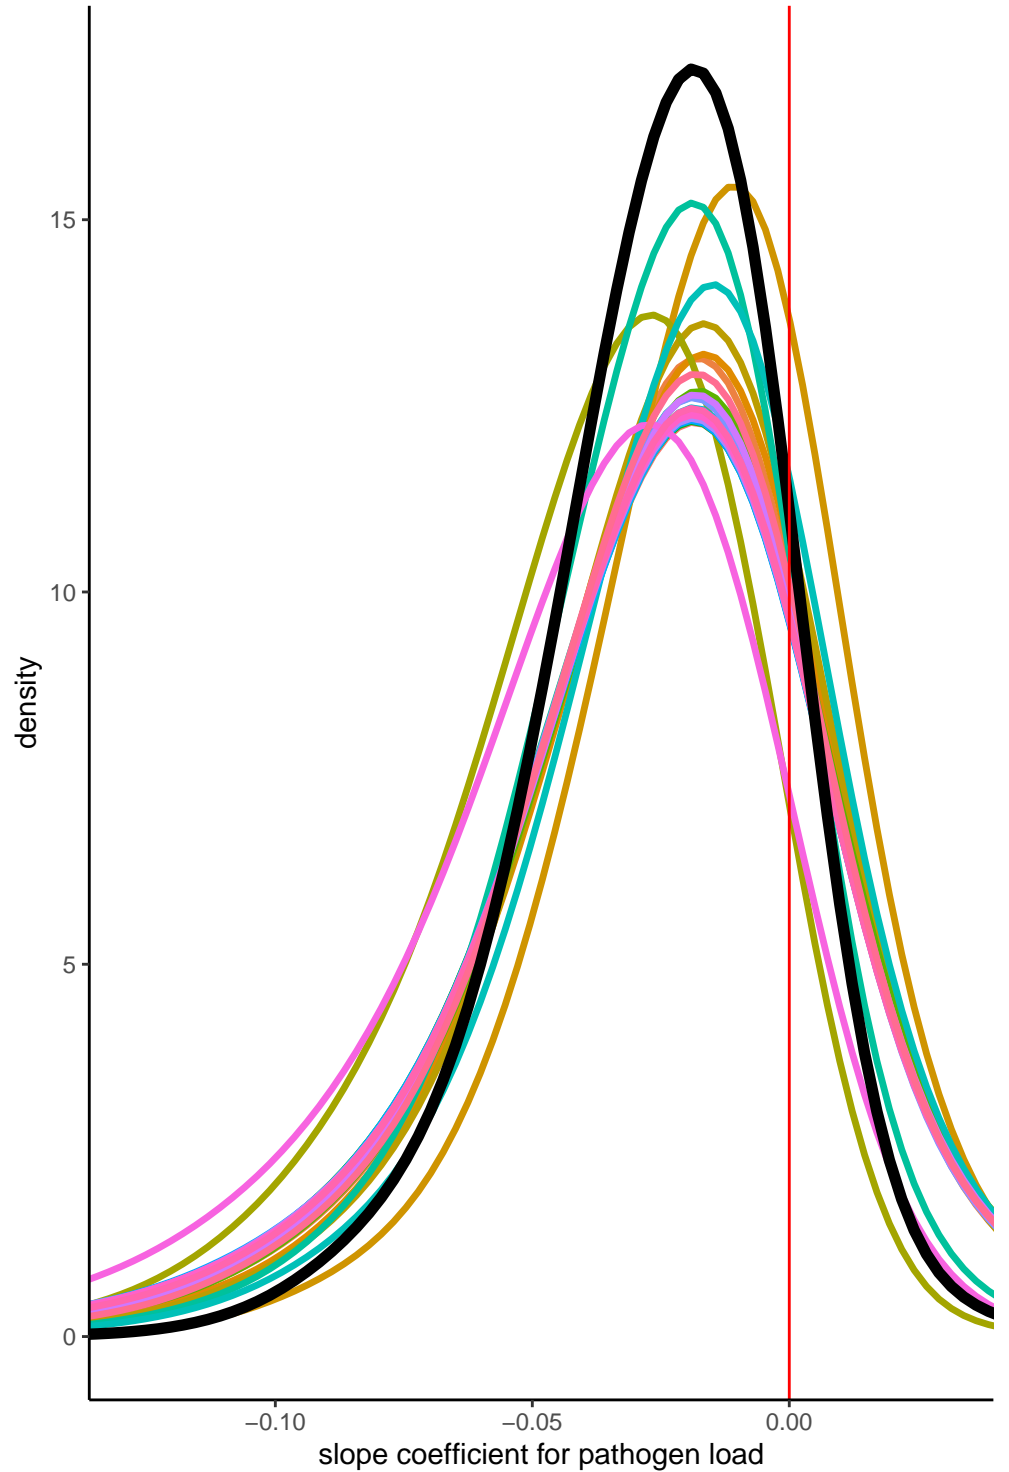



Tenacibaculum maritimum FaWi

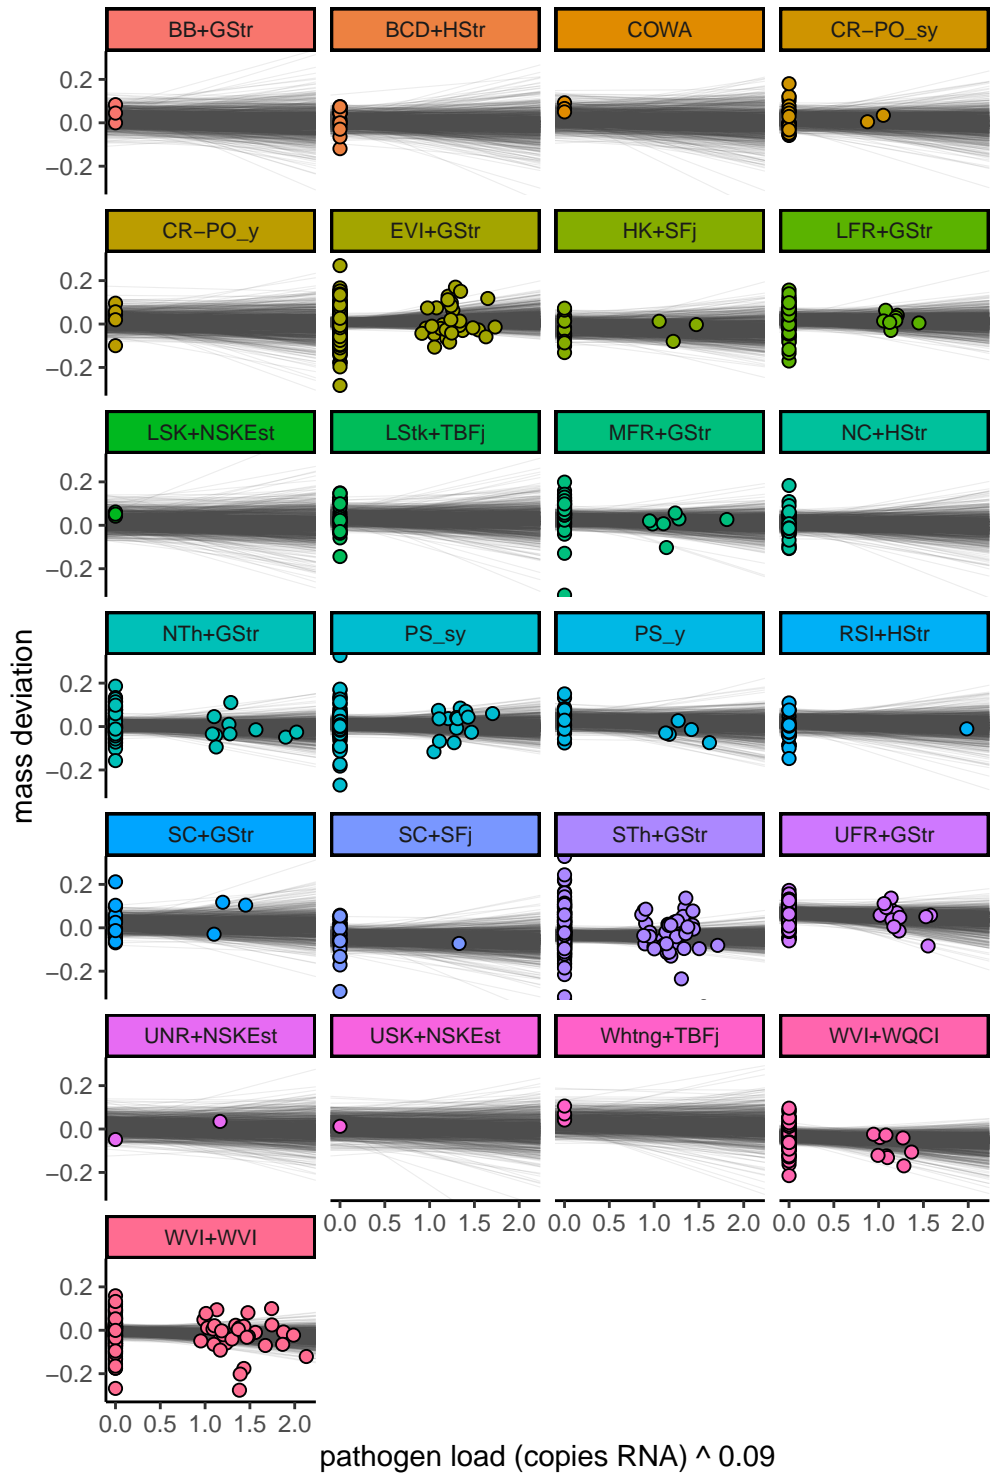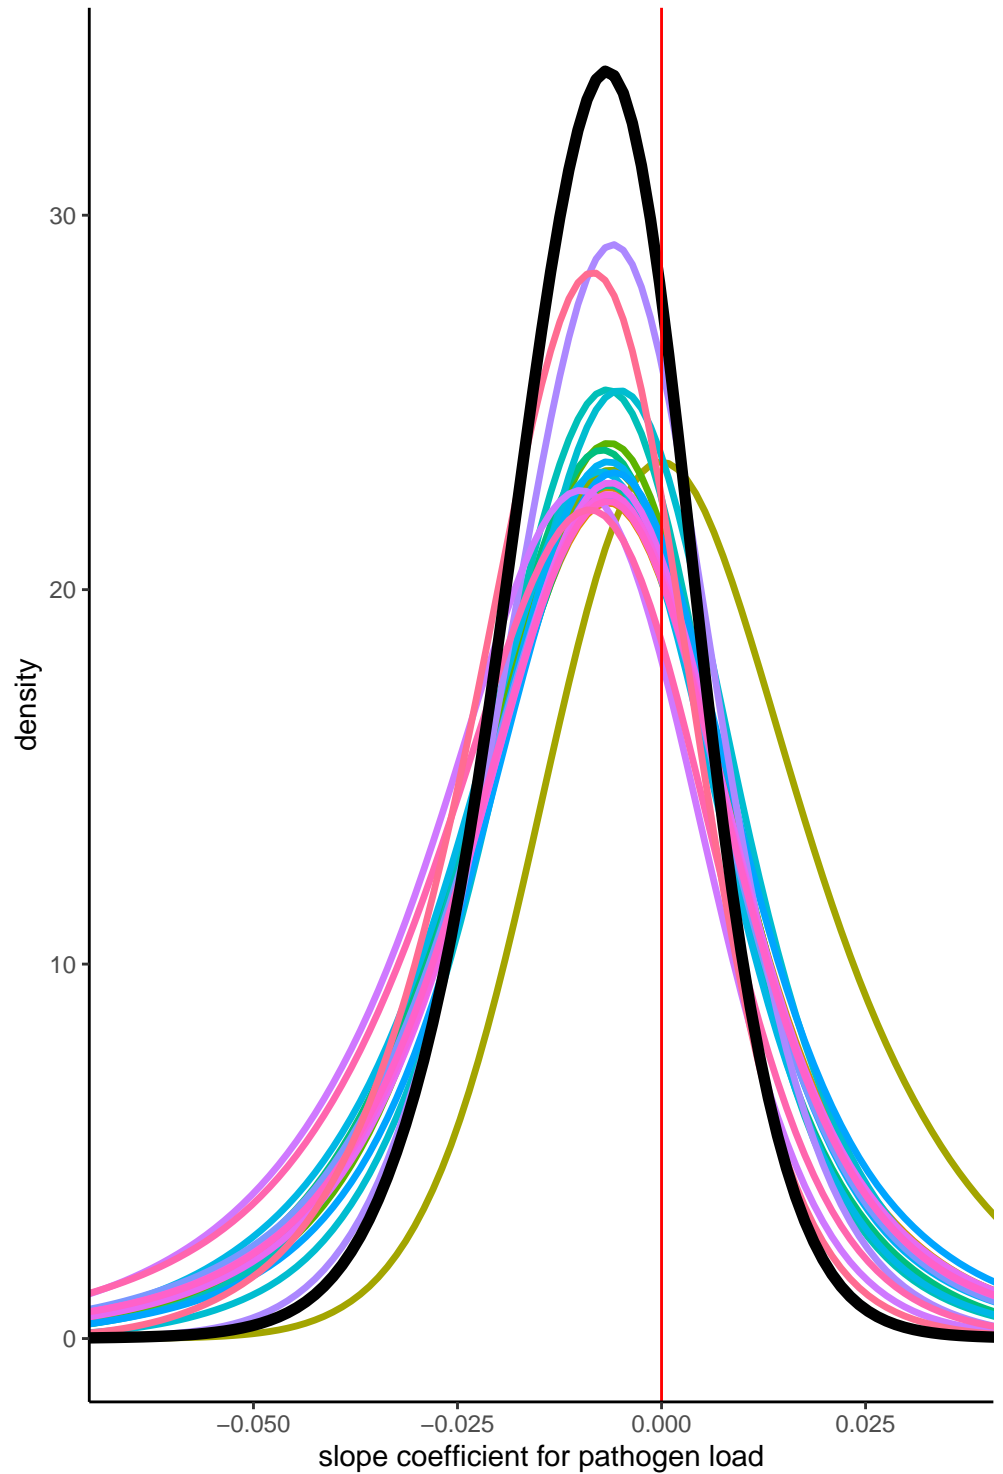

# Erythrocytic Necrosis Virus SpSu

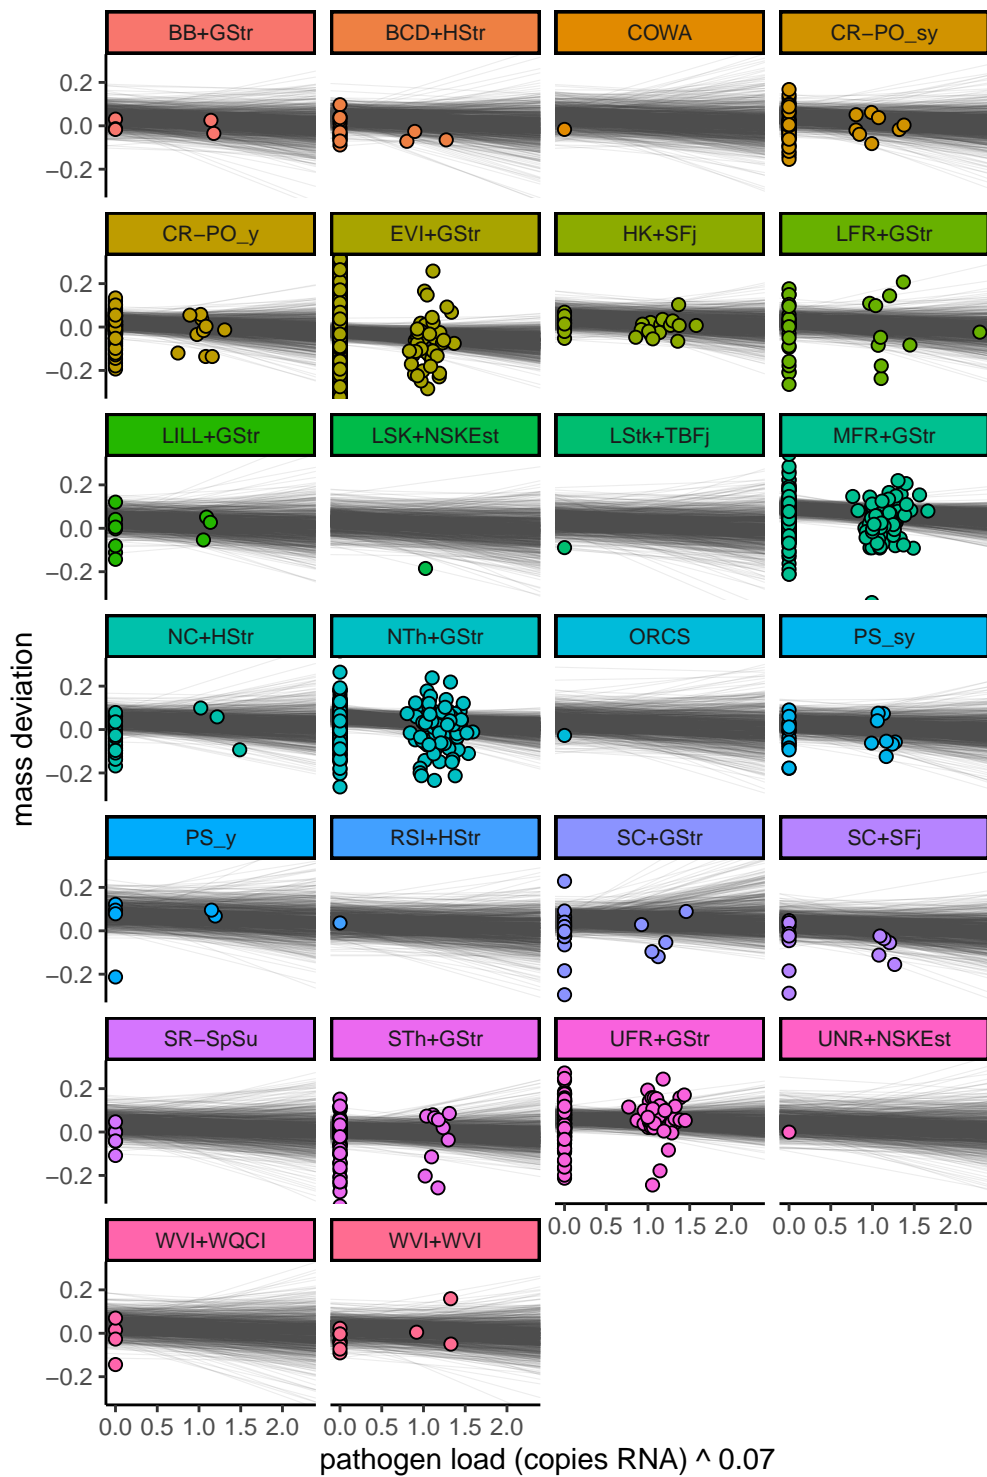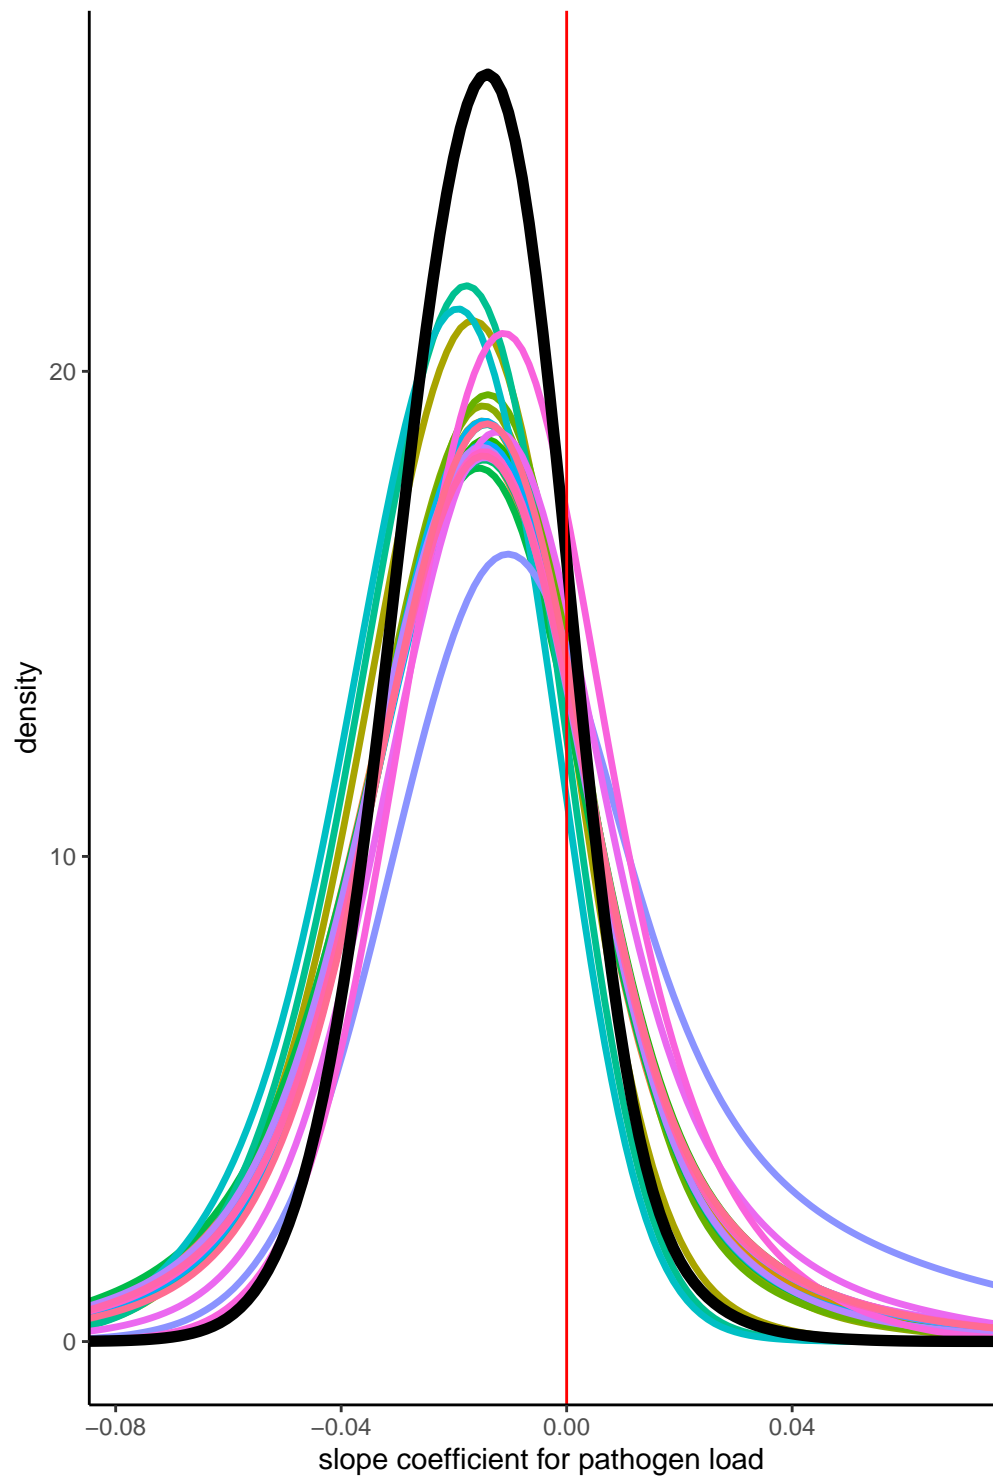

# Erythrocytic Necrosis Virus FaWi

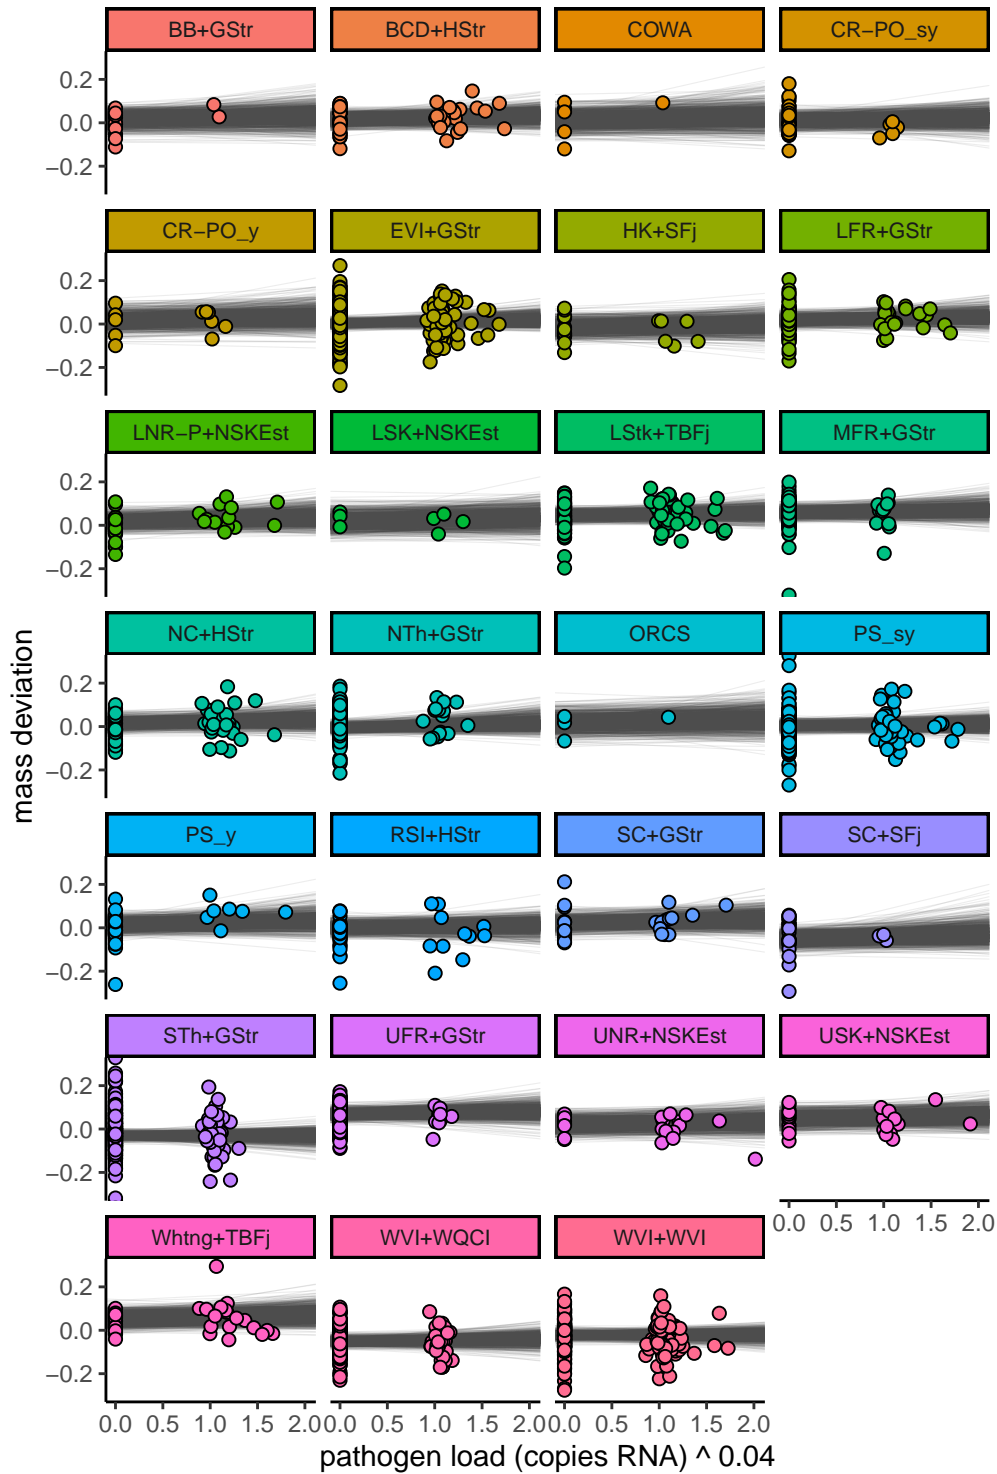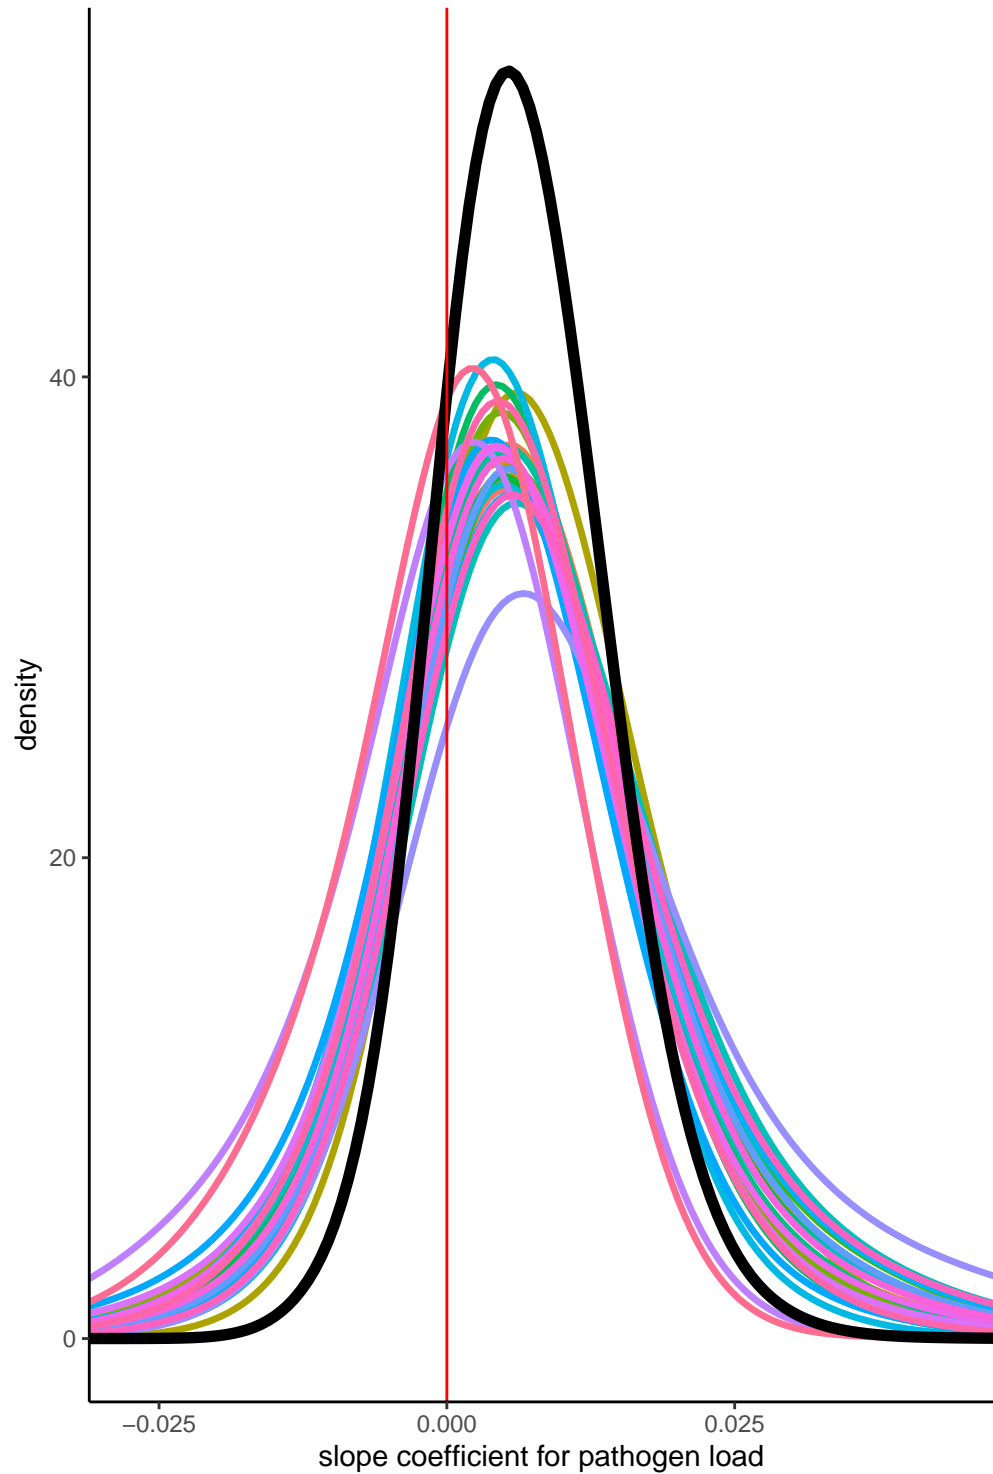

### Viral Hemorrhagic Septicemia Virus SpSu

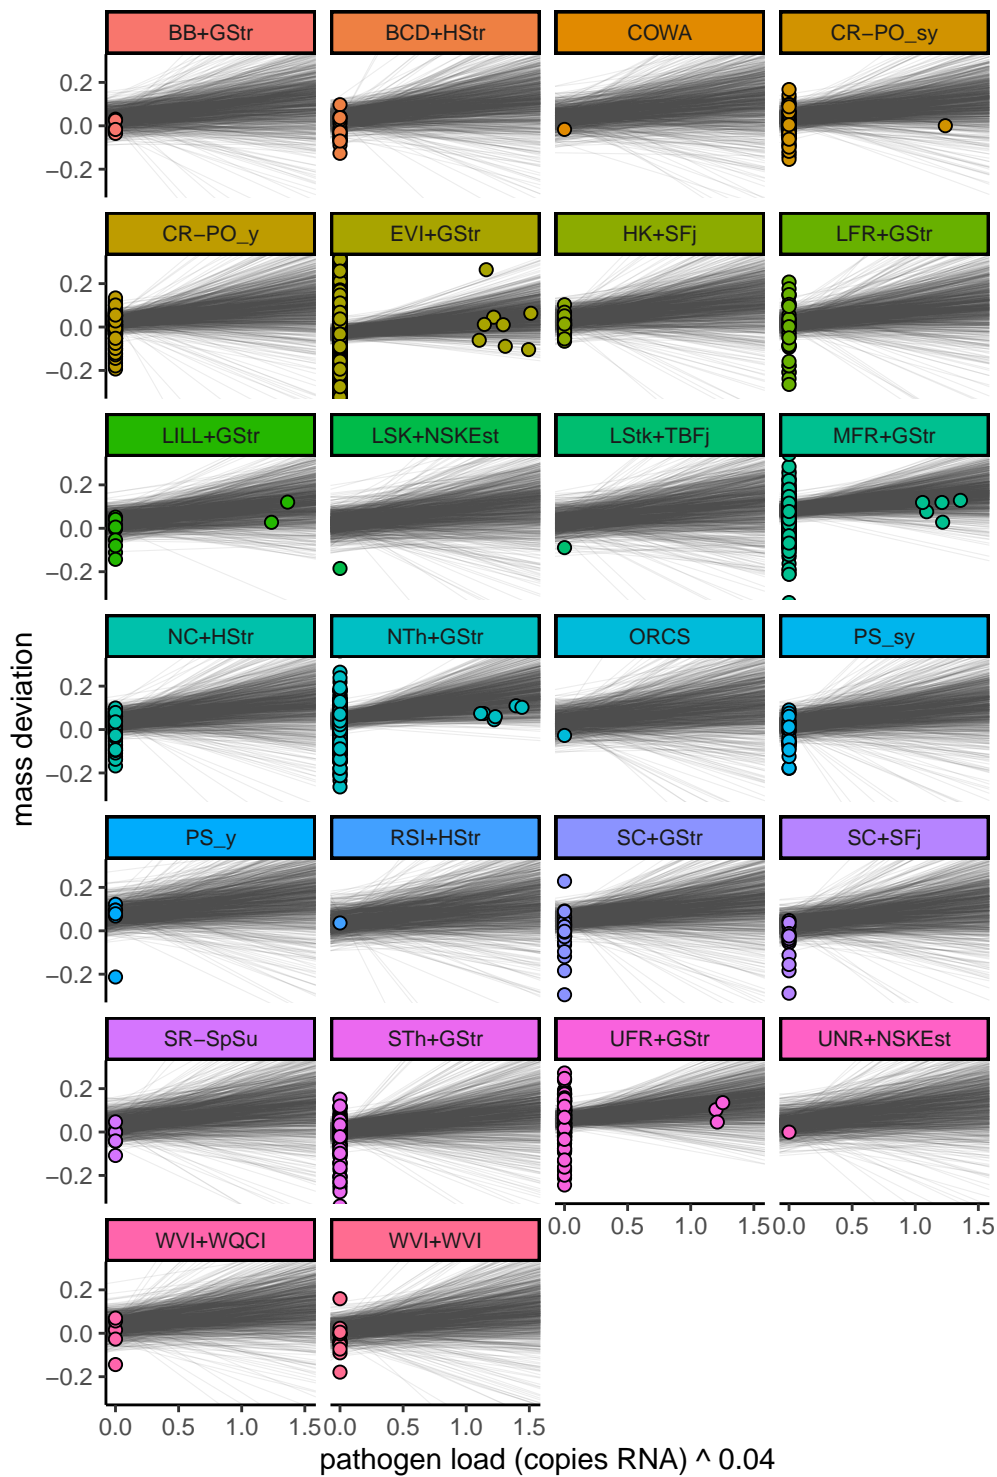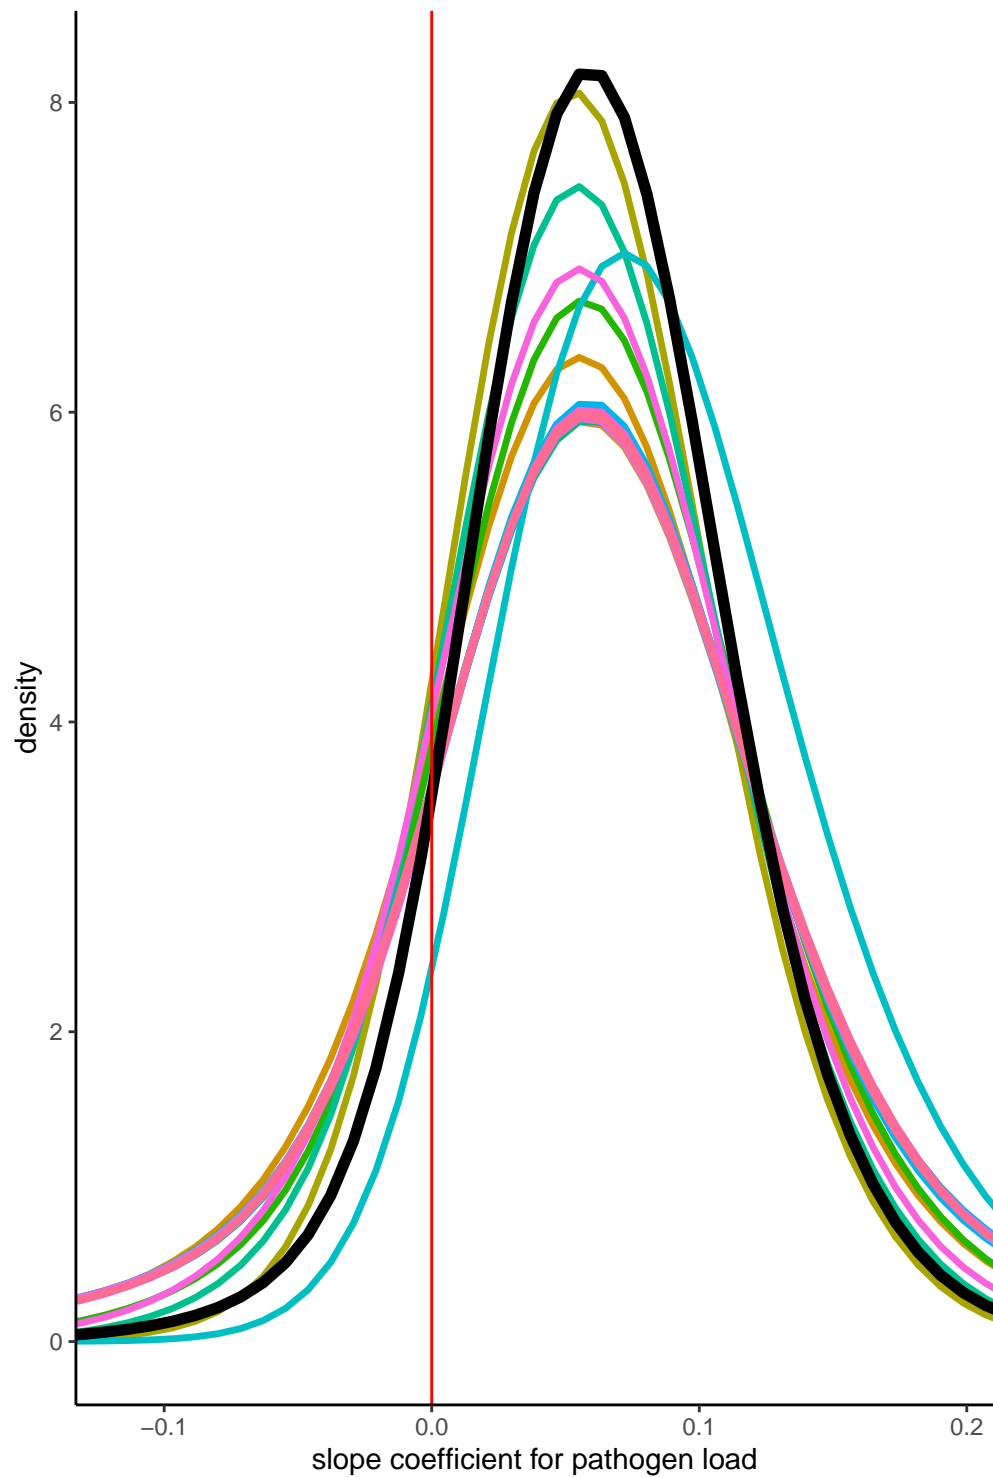

Total number of pathogen taxa SpSu

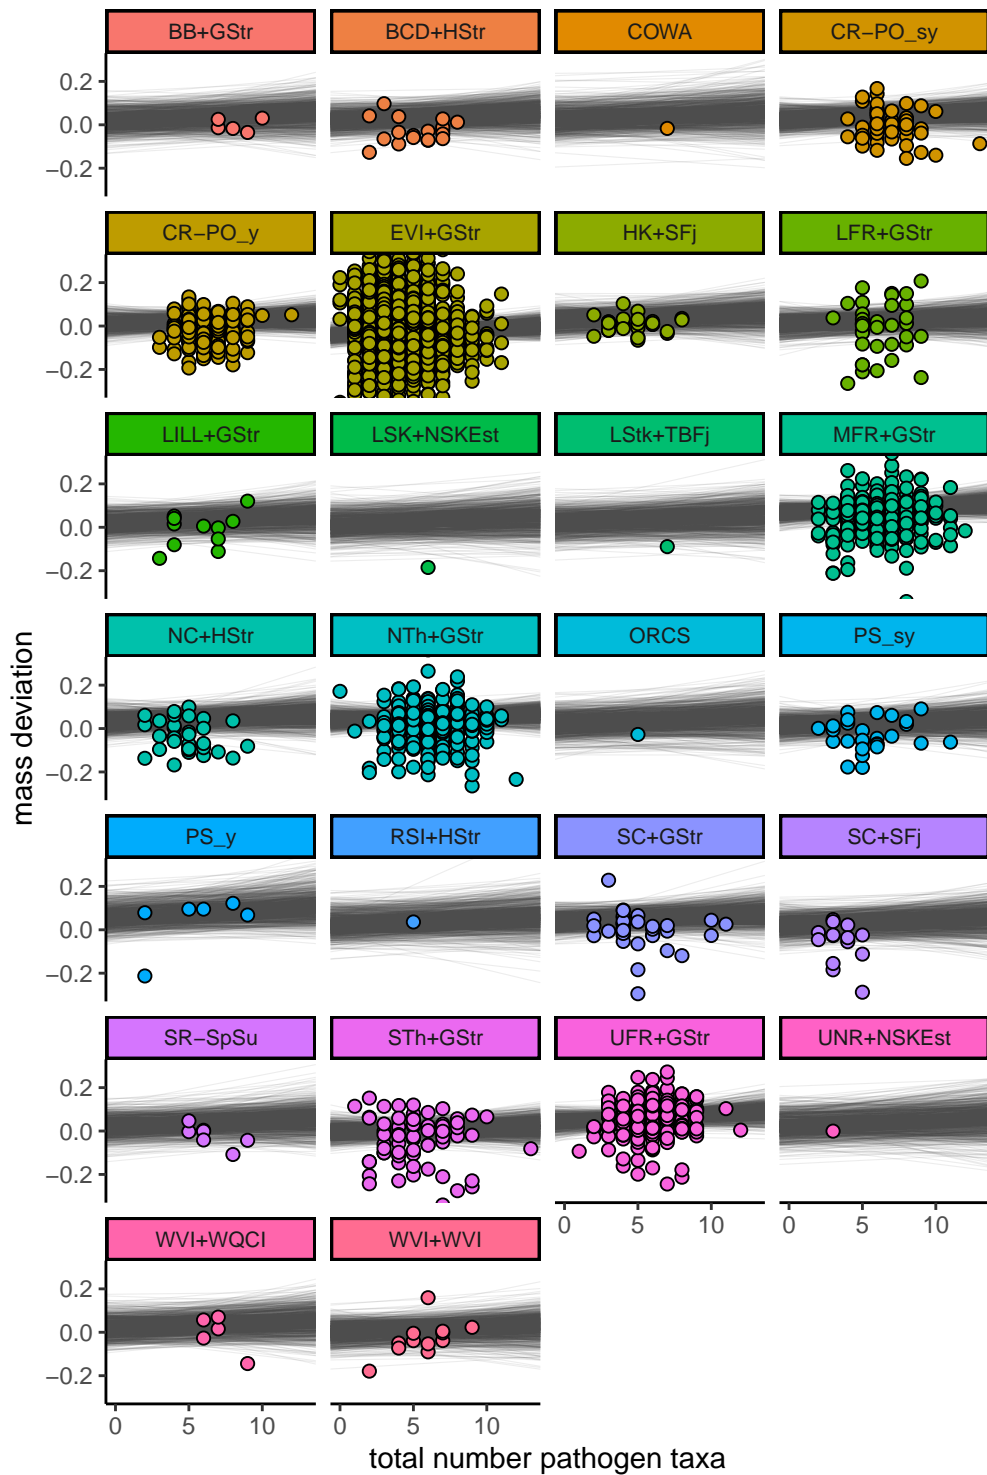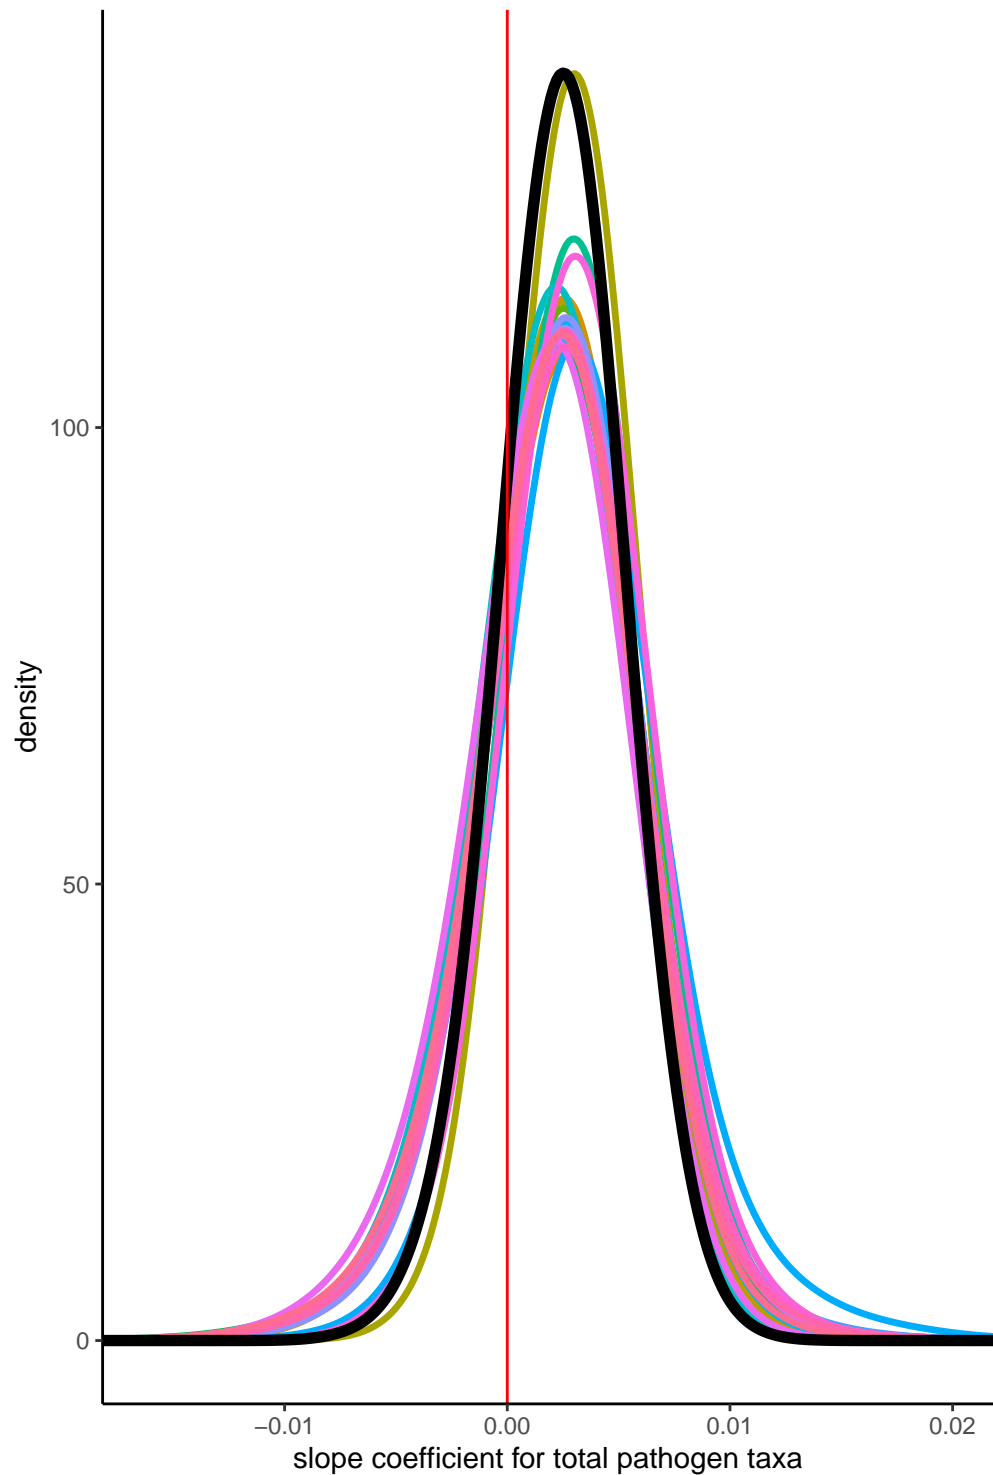

Total number of pathogen taxa FaWi

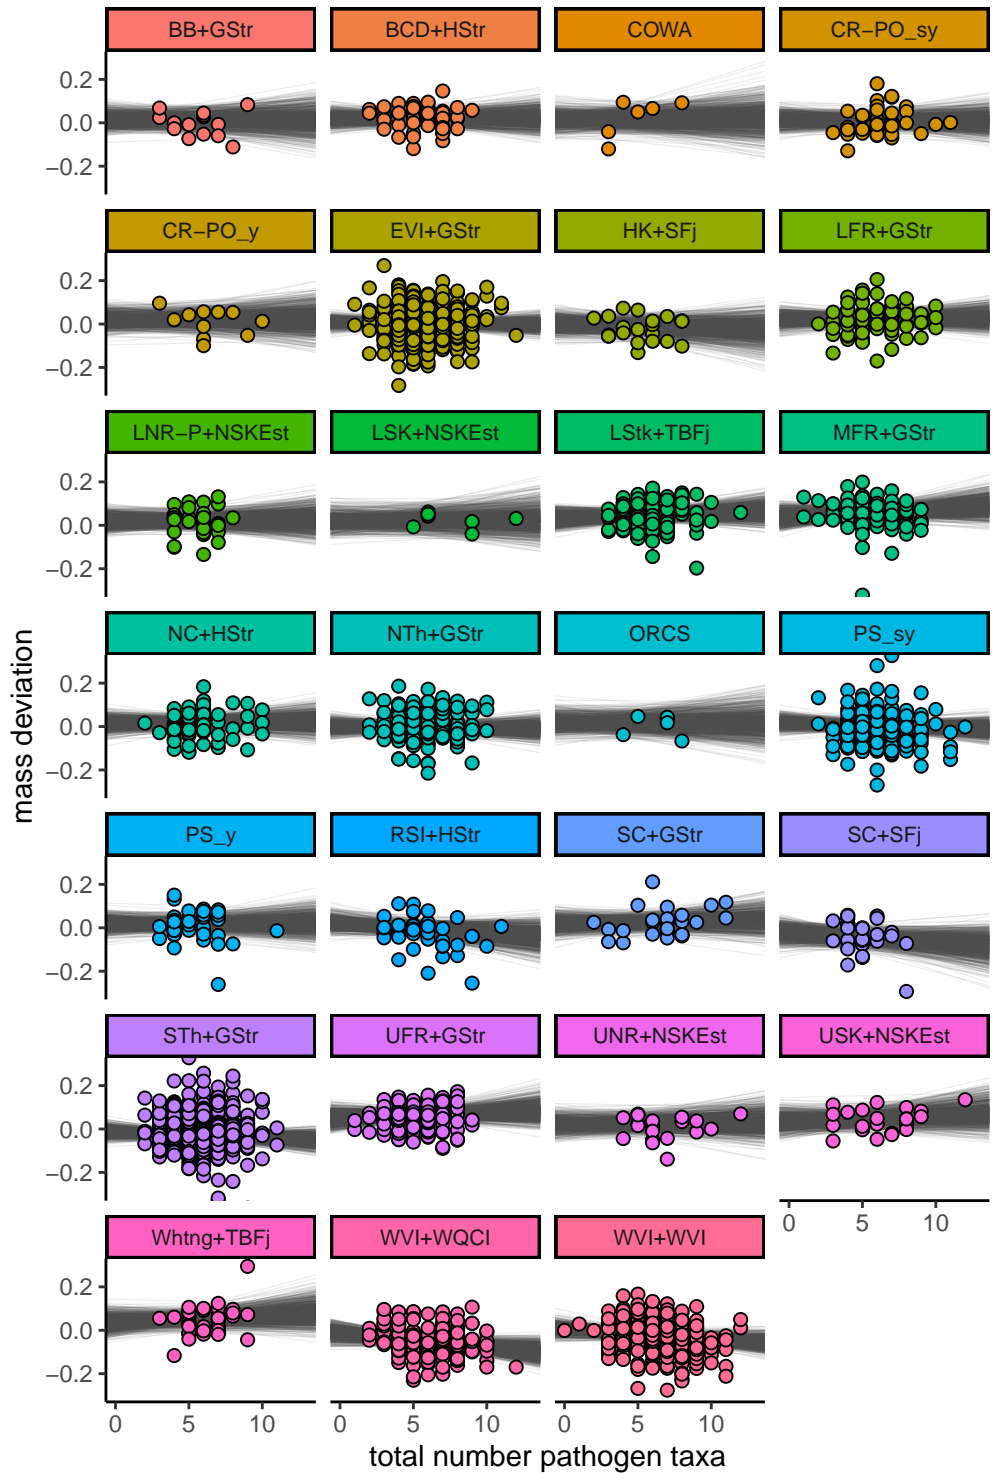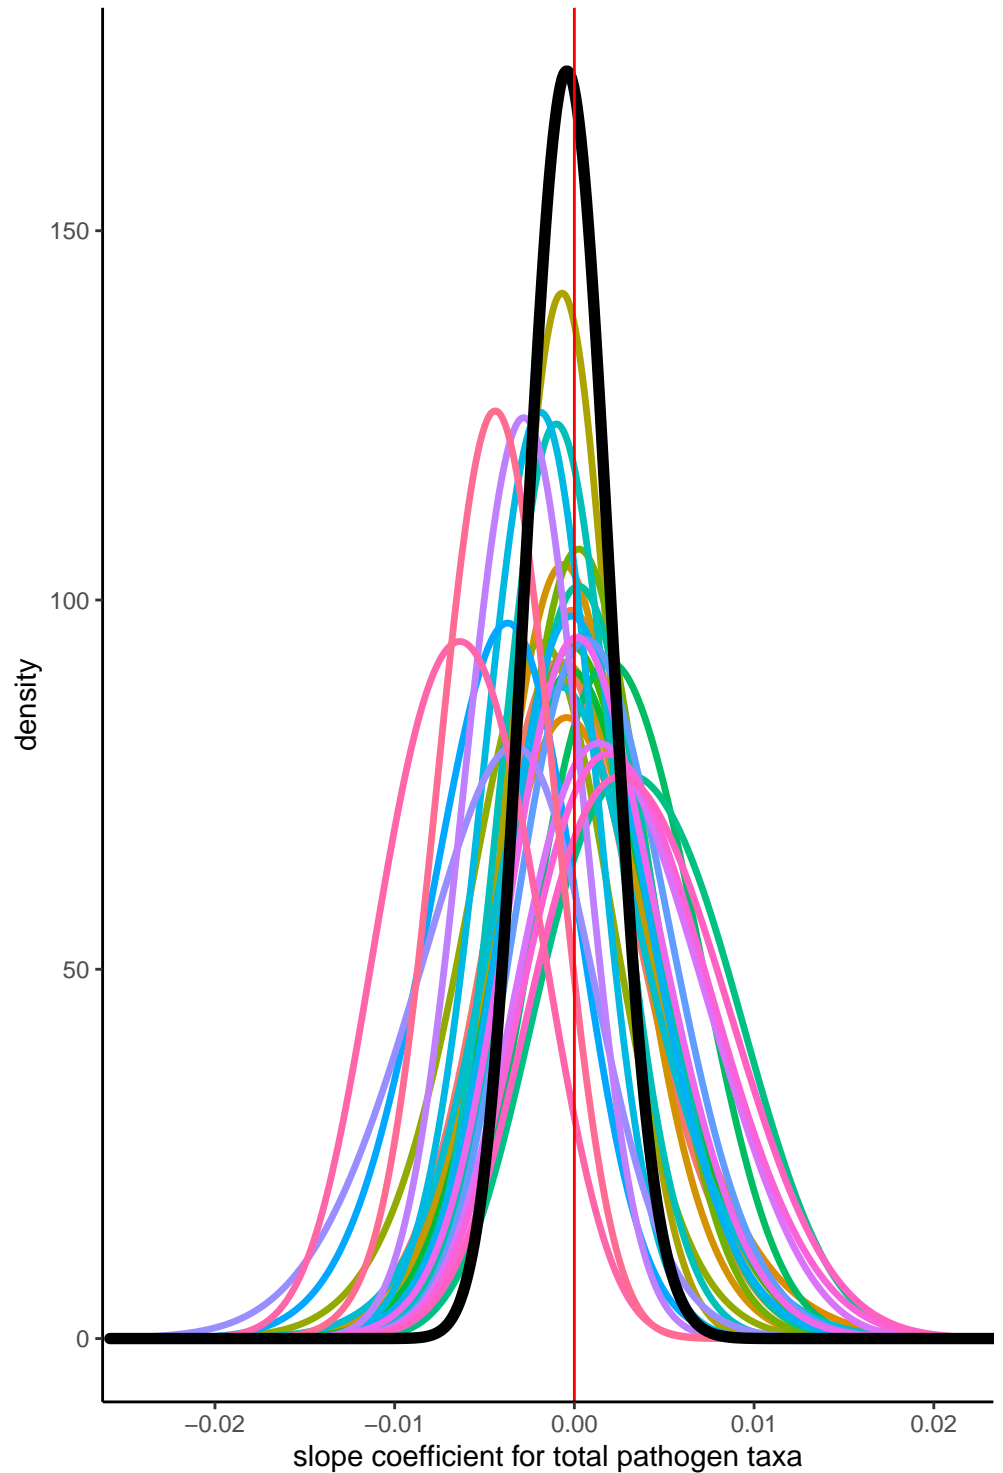

### Relative infectious agent burden SpSu

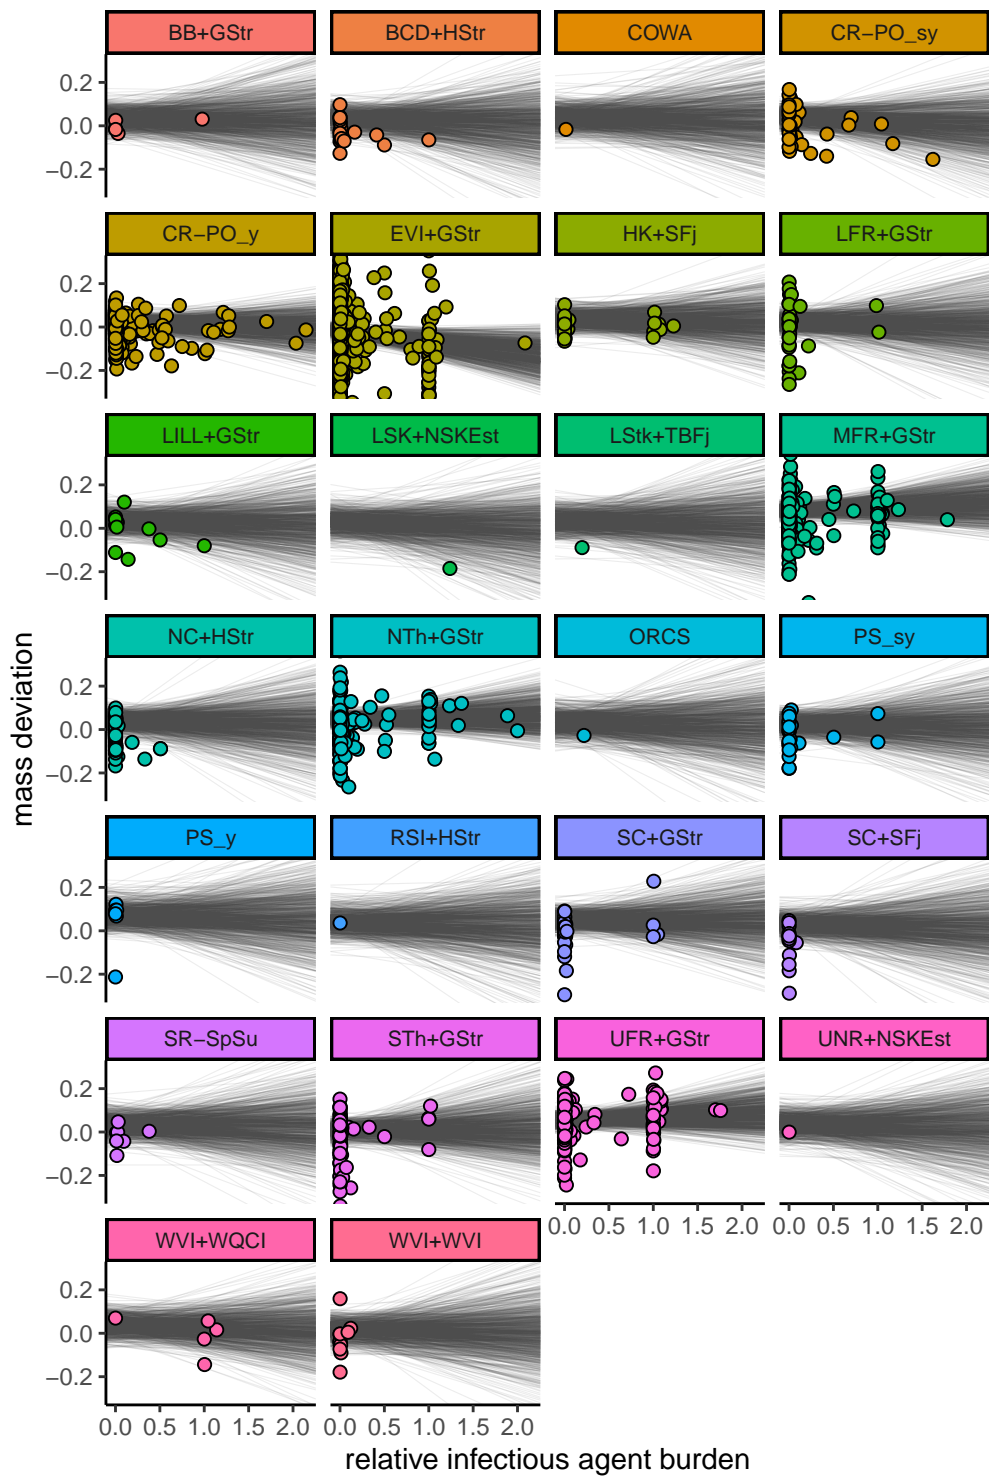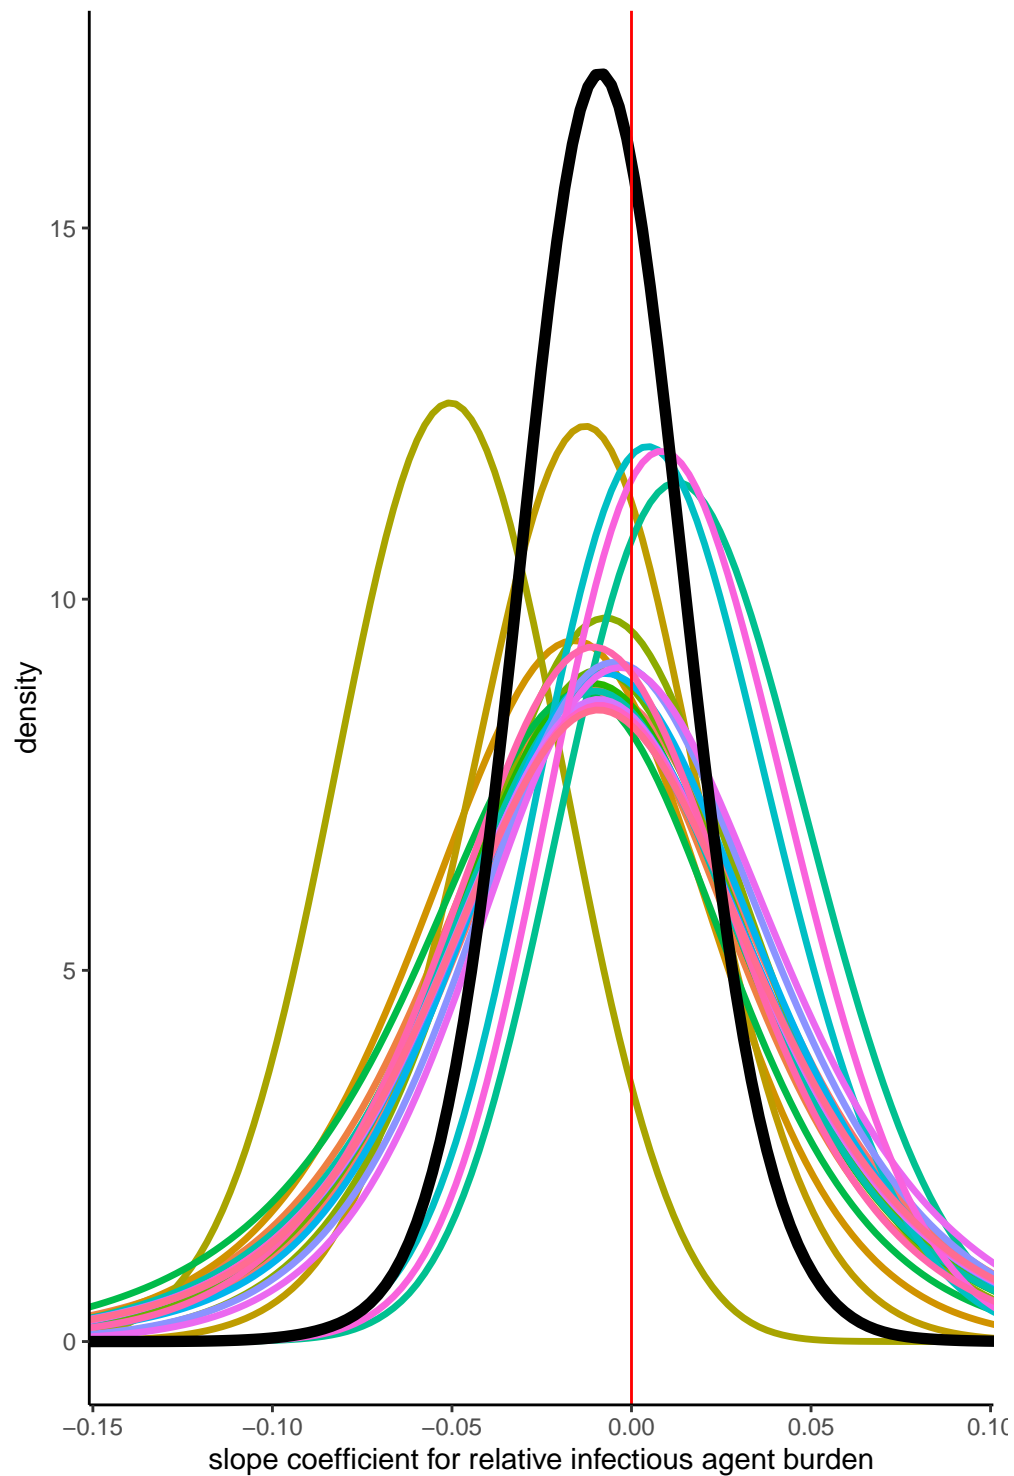

### Relative infectious agent burden FaWi

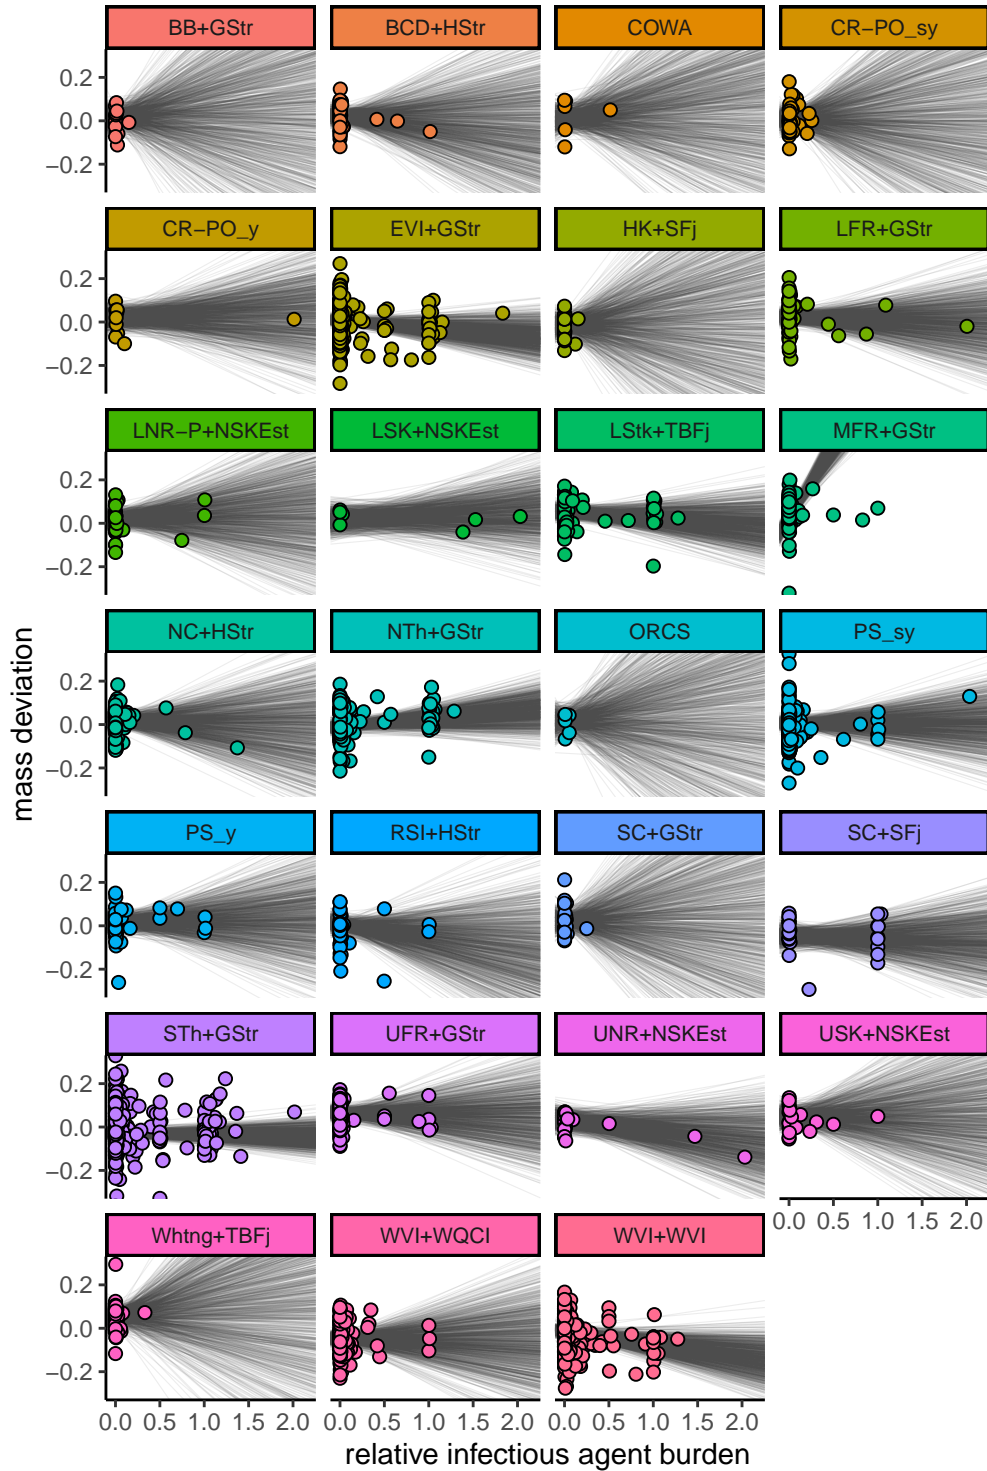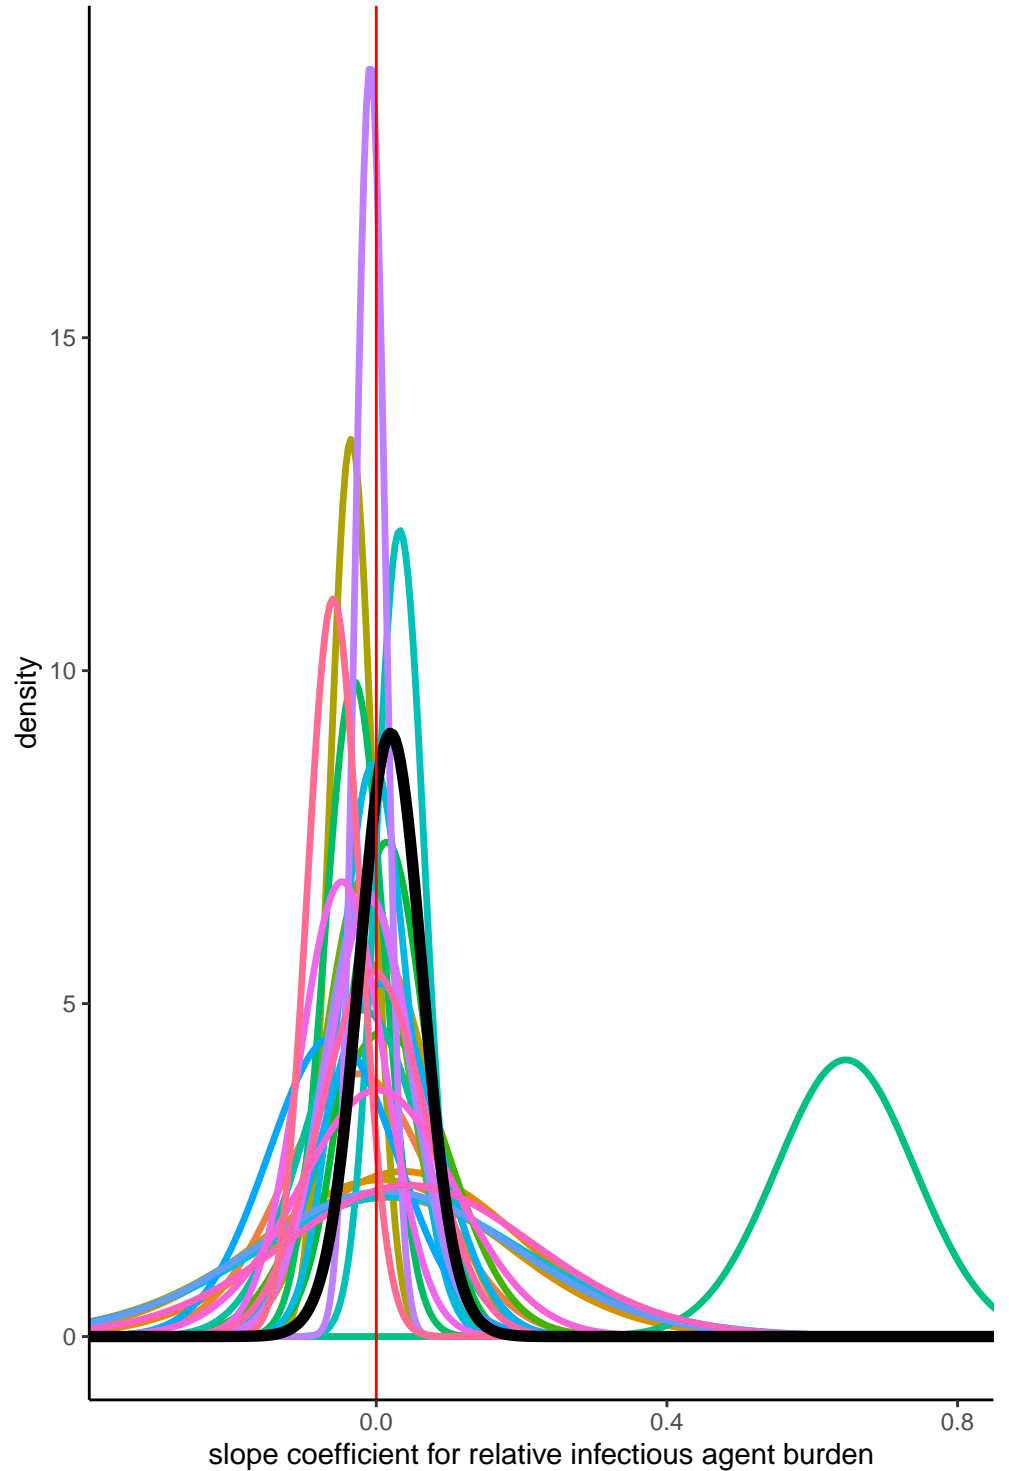

Supplement: facets-2021-0102_supplement4.pdf [file facets-2021-0102_supplement4.pdf]
