# Supplementary material for: Identification of infectious agents in early marine Chinook and Coho salmon associated with cohort survival
Source: Atypon-hosted journal article supplement (doi:10.1139/facets-2021-0102), 2022-01-01

## **Supplementary Material 5: Coho mass deviation model figures**

### **"Identification of infectious agents in early marine Chinook and Coho salmon associated with cohort survival"**

Arthur L. Bass, Andrew W. Bateman, Brendan M. Connors, Benjamin A. Staton, Eric B. Rondeau, Gideon J. Mordecai, Amy K. Teffer, Karia H. Kaukinen, Shaorong Li, Amy M. Tabata, David A. Patterson, Scott G. Hinch, Kristina M. Miller

**Description:** Bayesian multi-level model results from Coho mass deviation models. Raw data (points) are presented in left panels and model results are presented in right panels (heavy black line indicates the posterior distribution of the hyperdistribution mean). Lines in left panels represent 1000 random draws from the posterior distributions of the stock-specific intercepts and slopes. Slope coefficient for the right panel is relative to a 2 SD increase in pathogen load.

Candidatus Branchiomonas cysticola SpSu

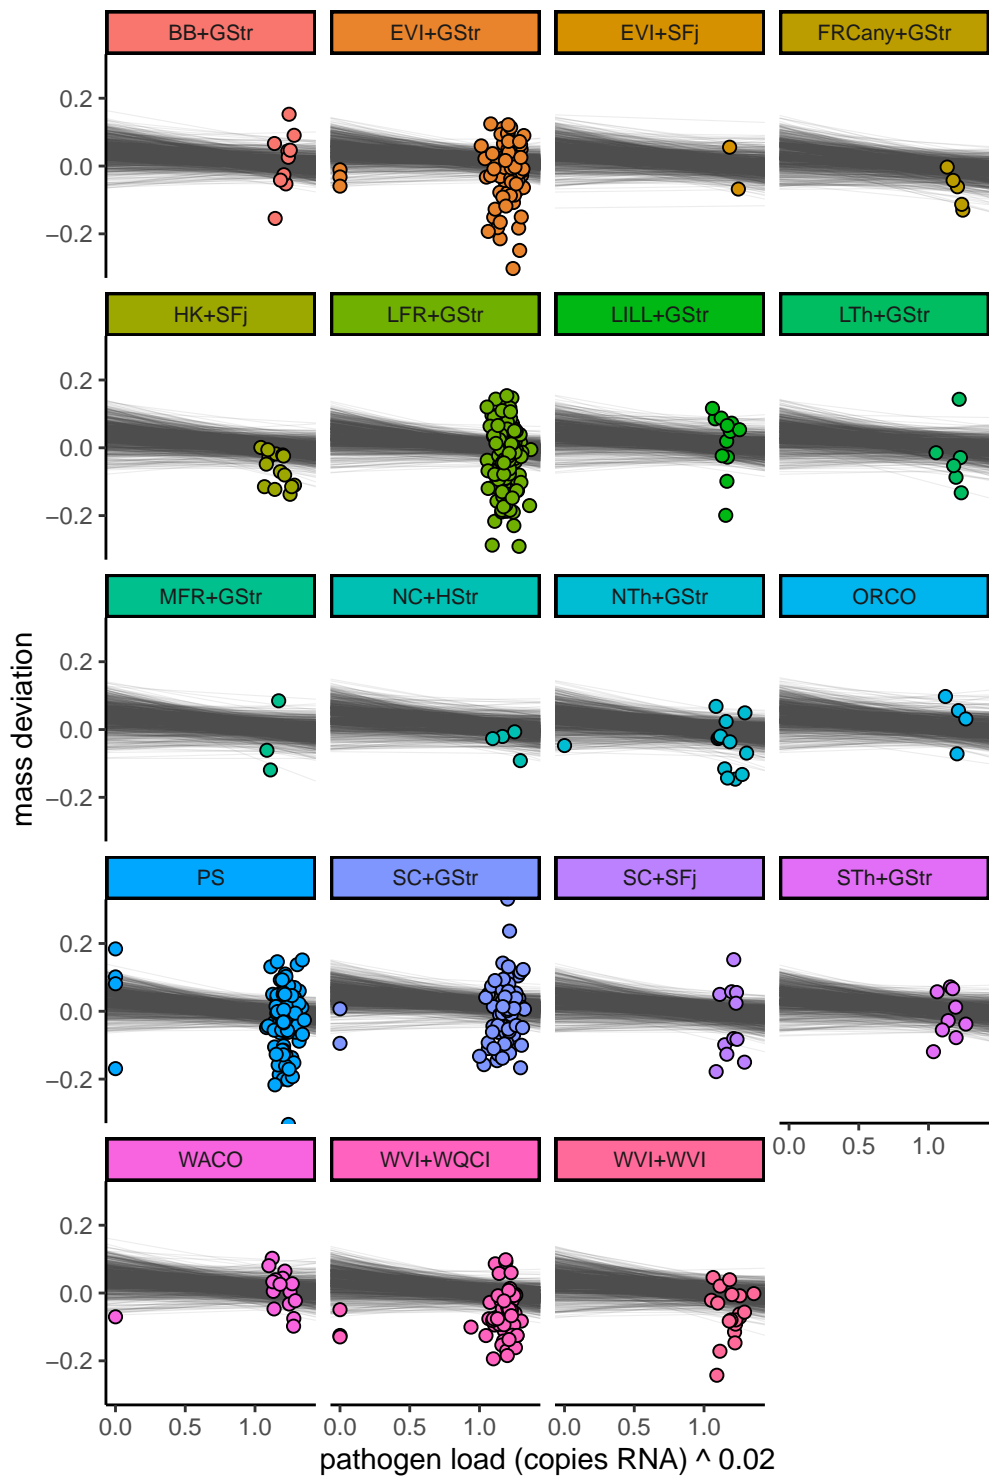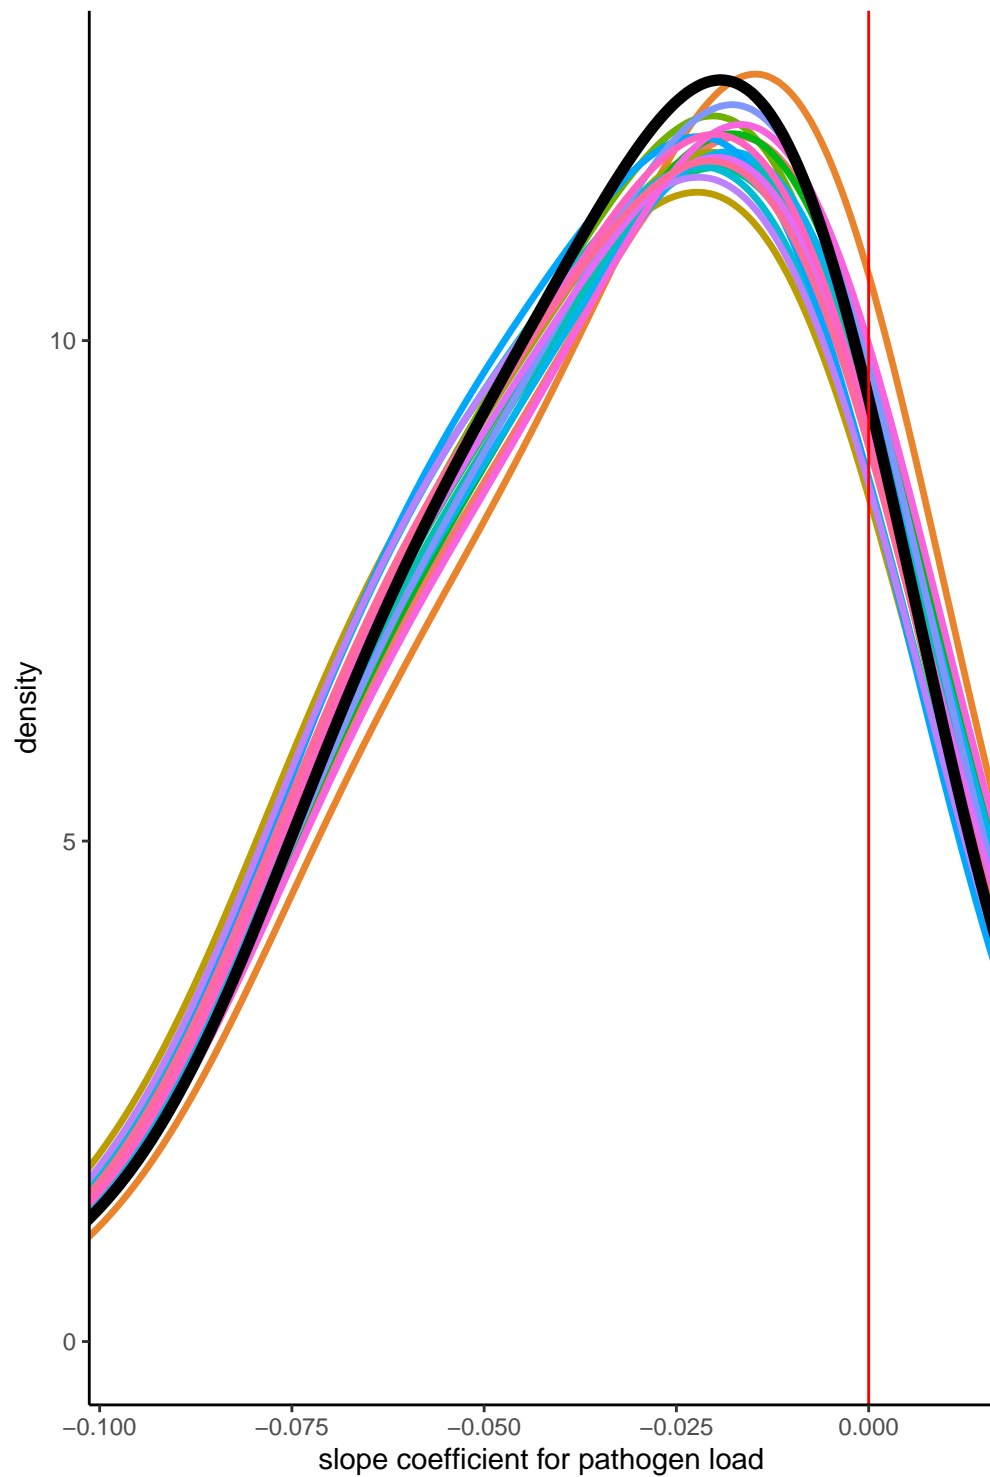

Candidatus Branchiomonas cysticola FaWi

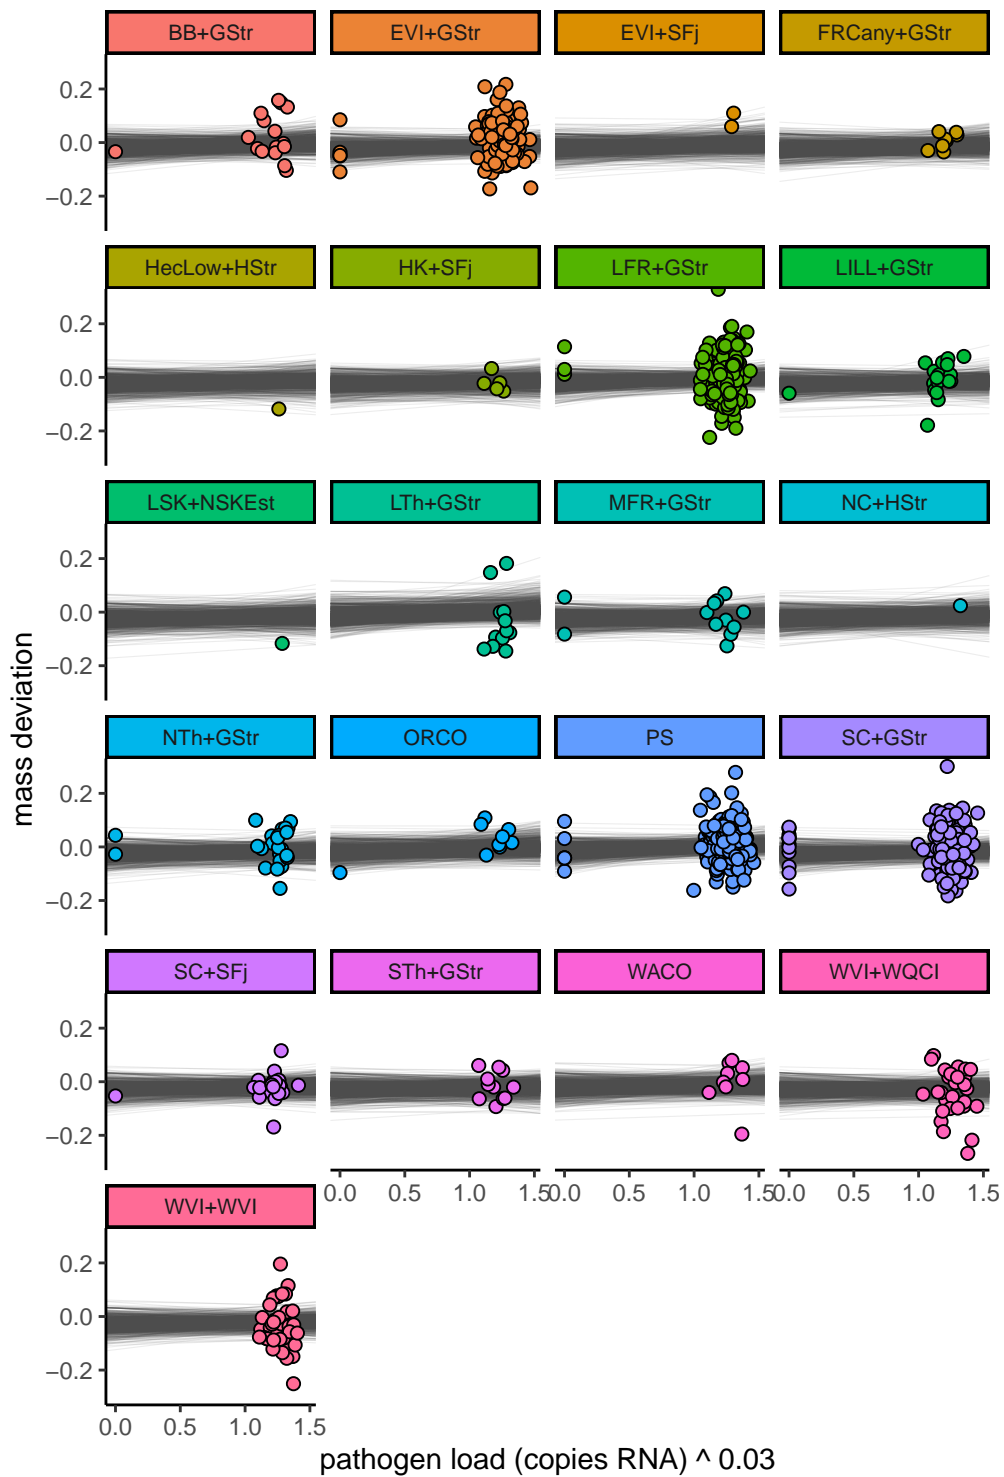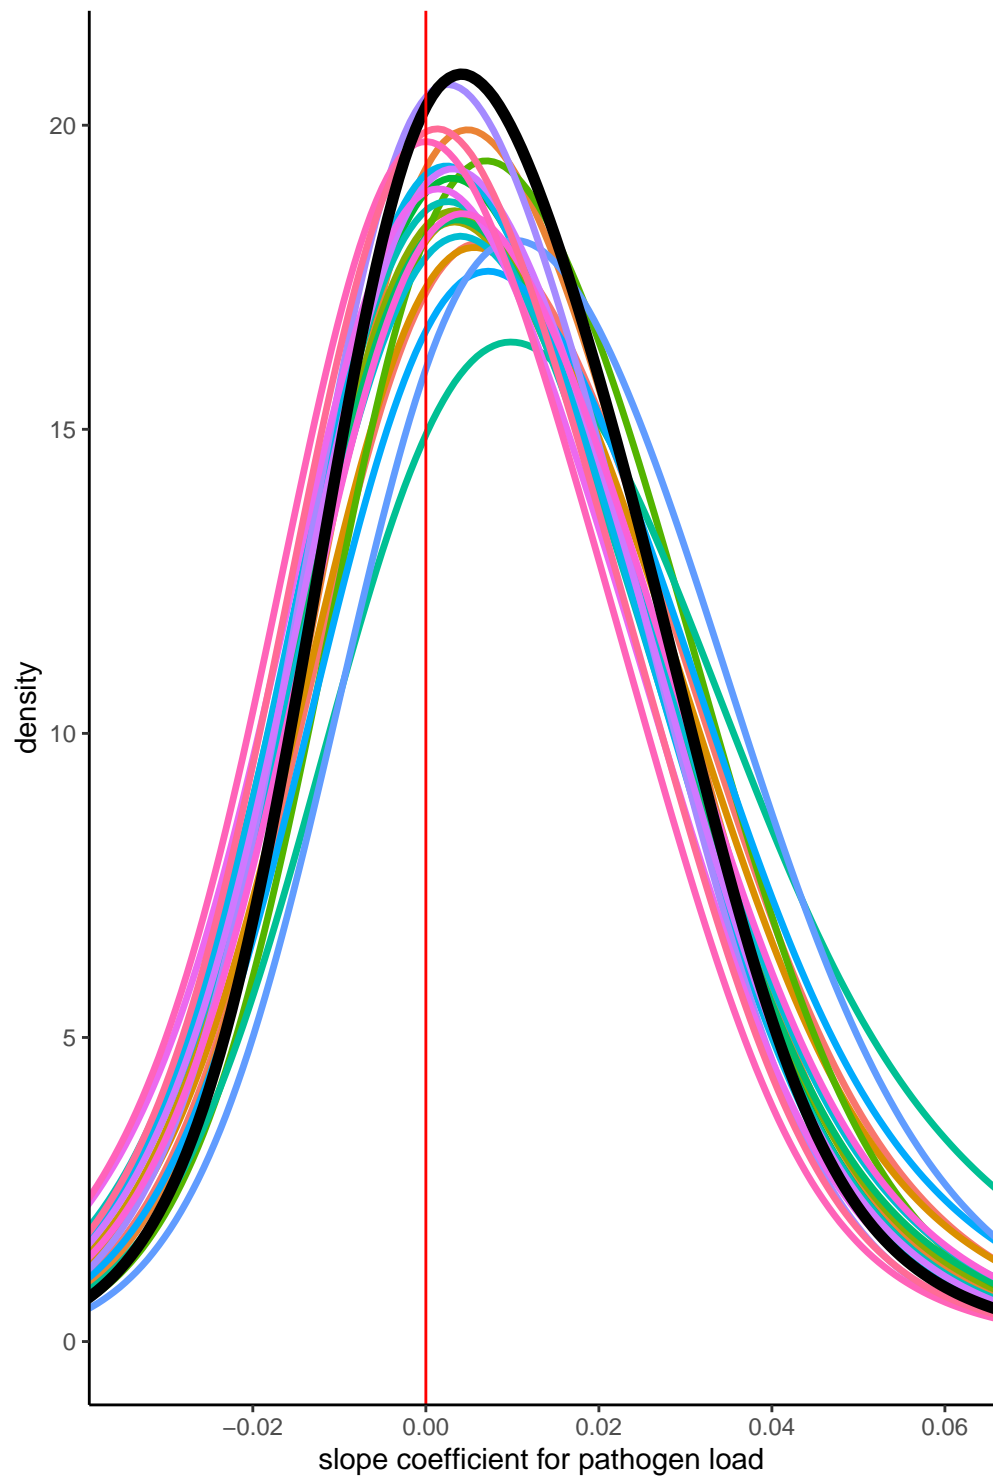

Ceratonova shasta SpSu

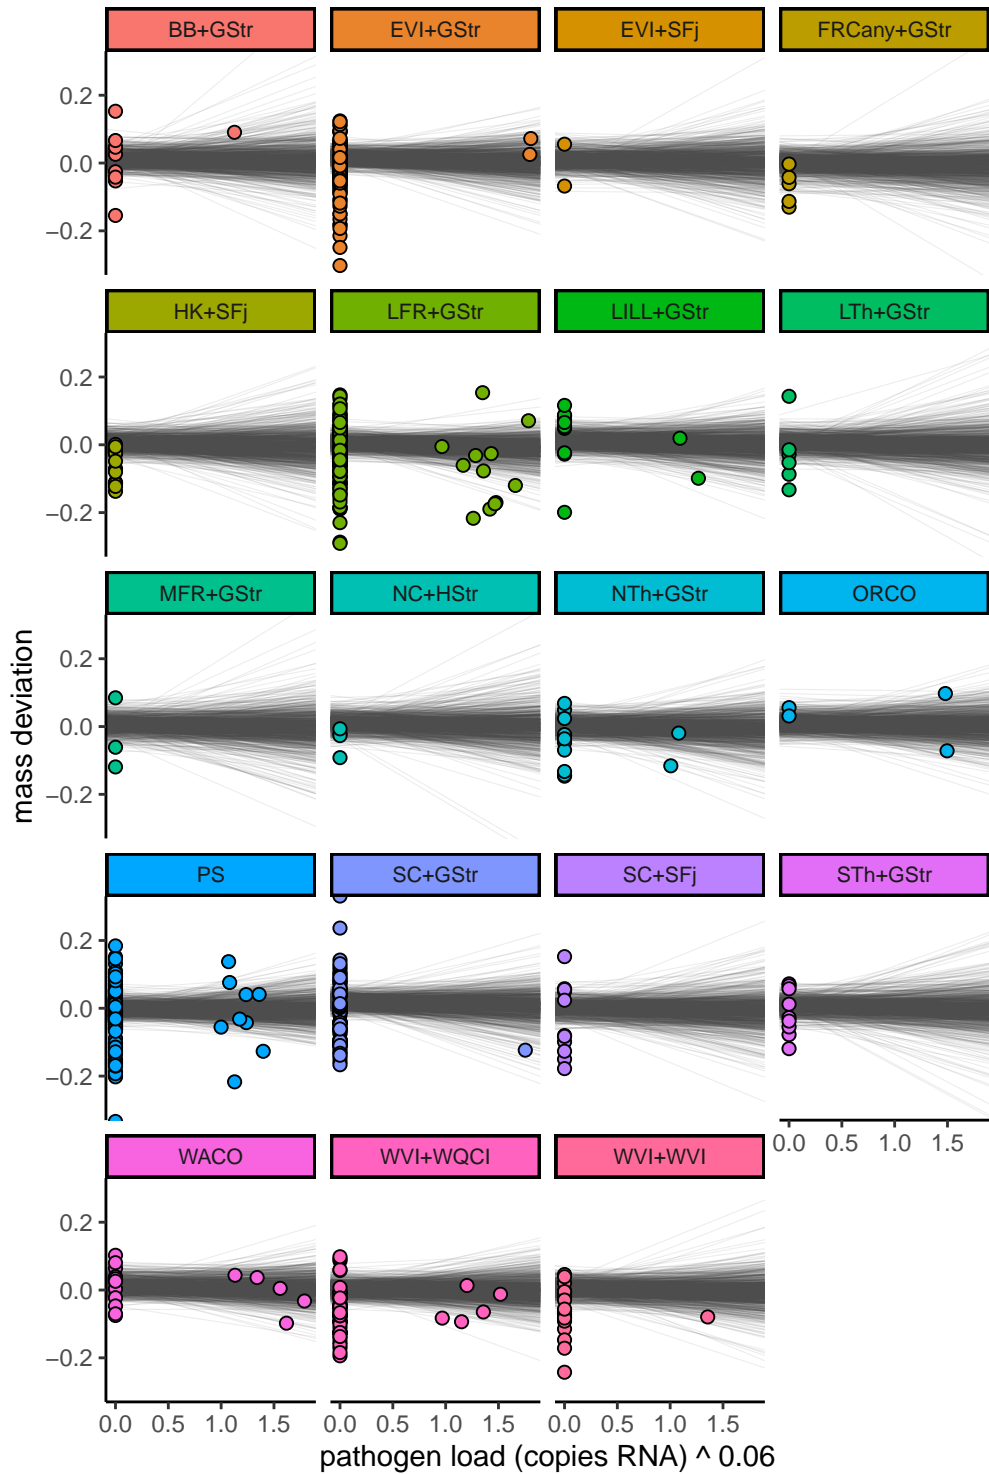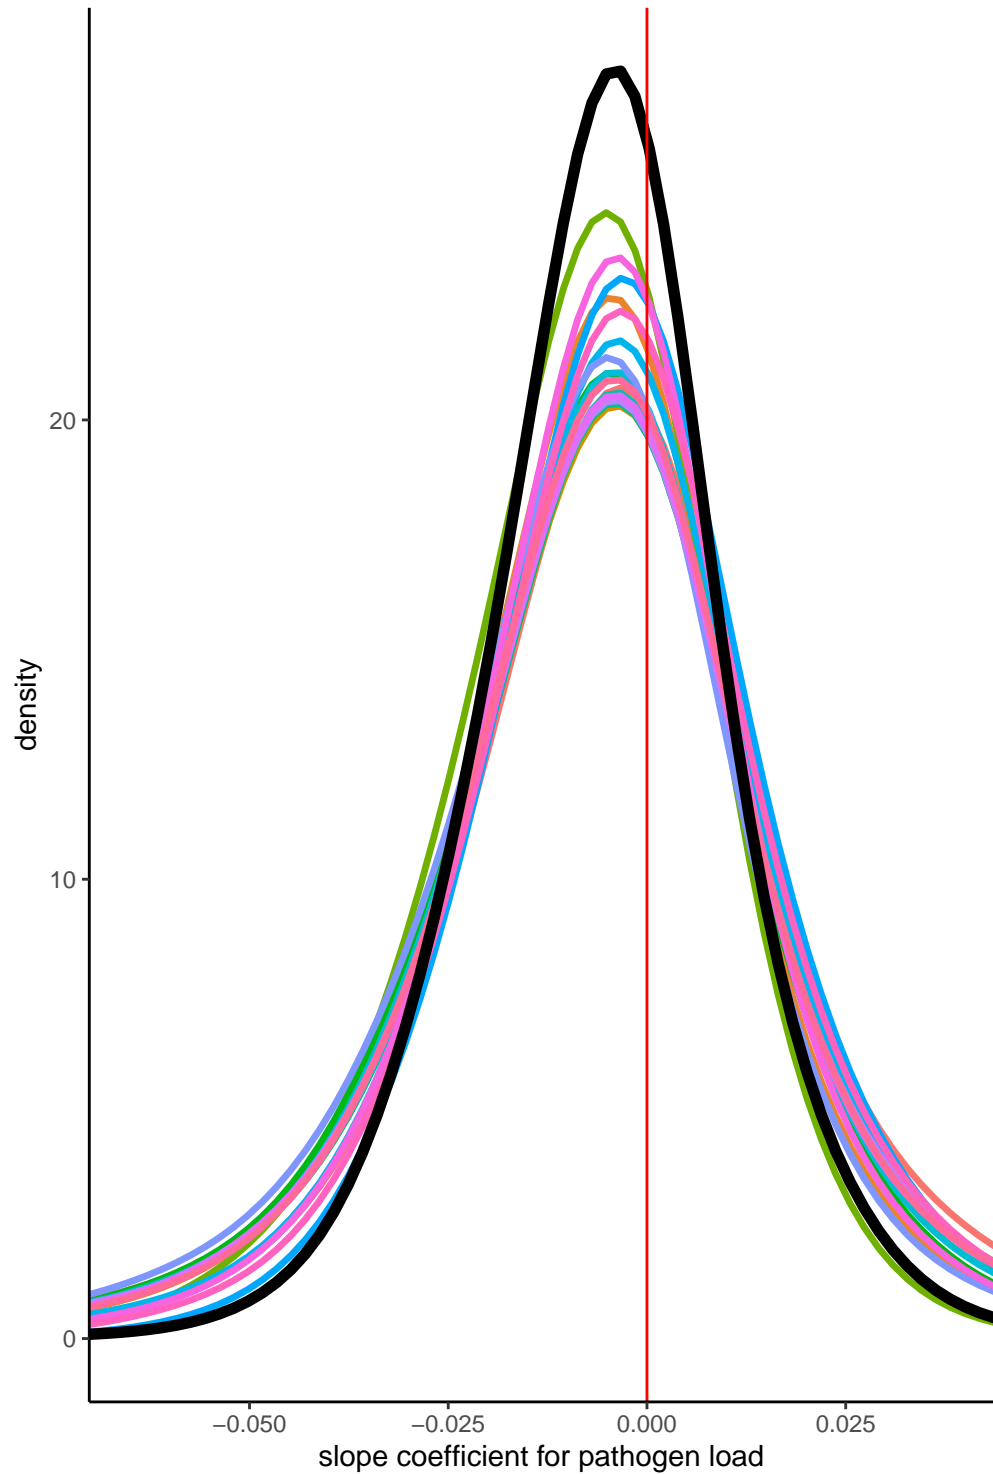

Ceratonova shasta FaWi

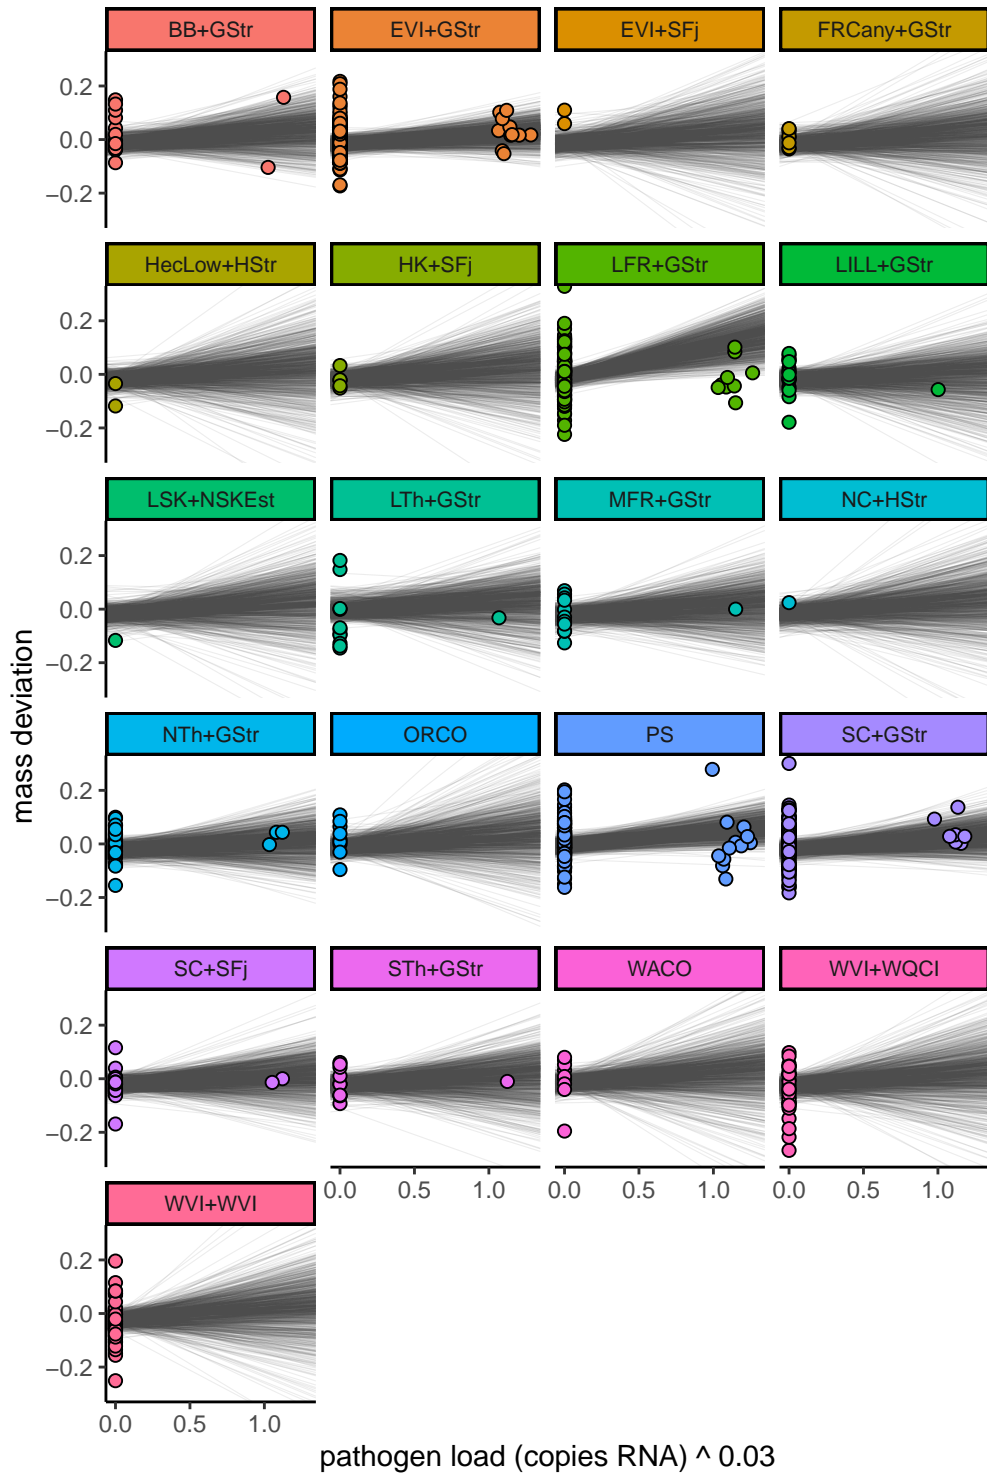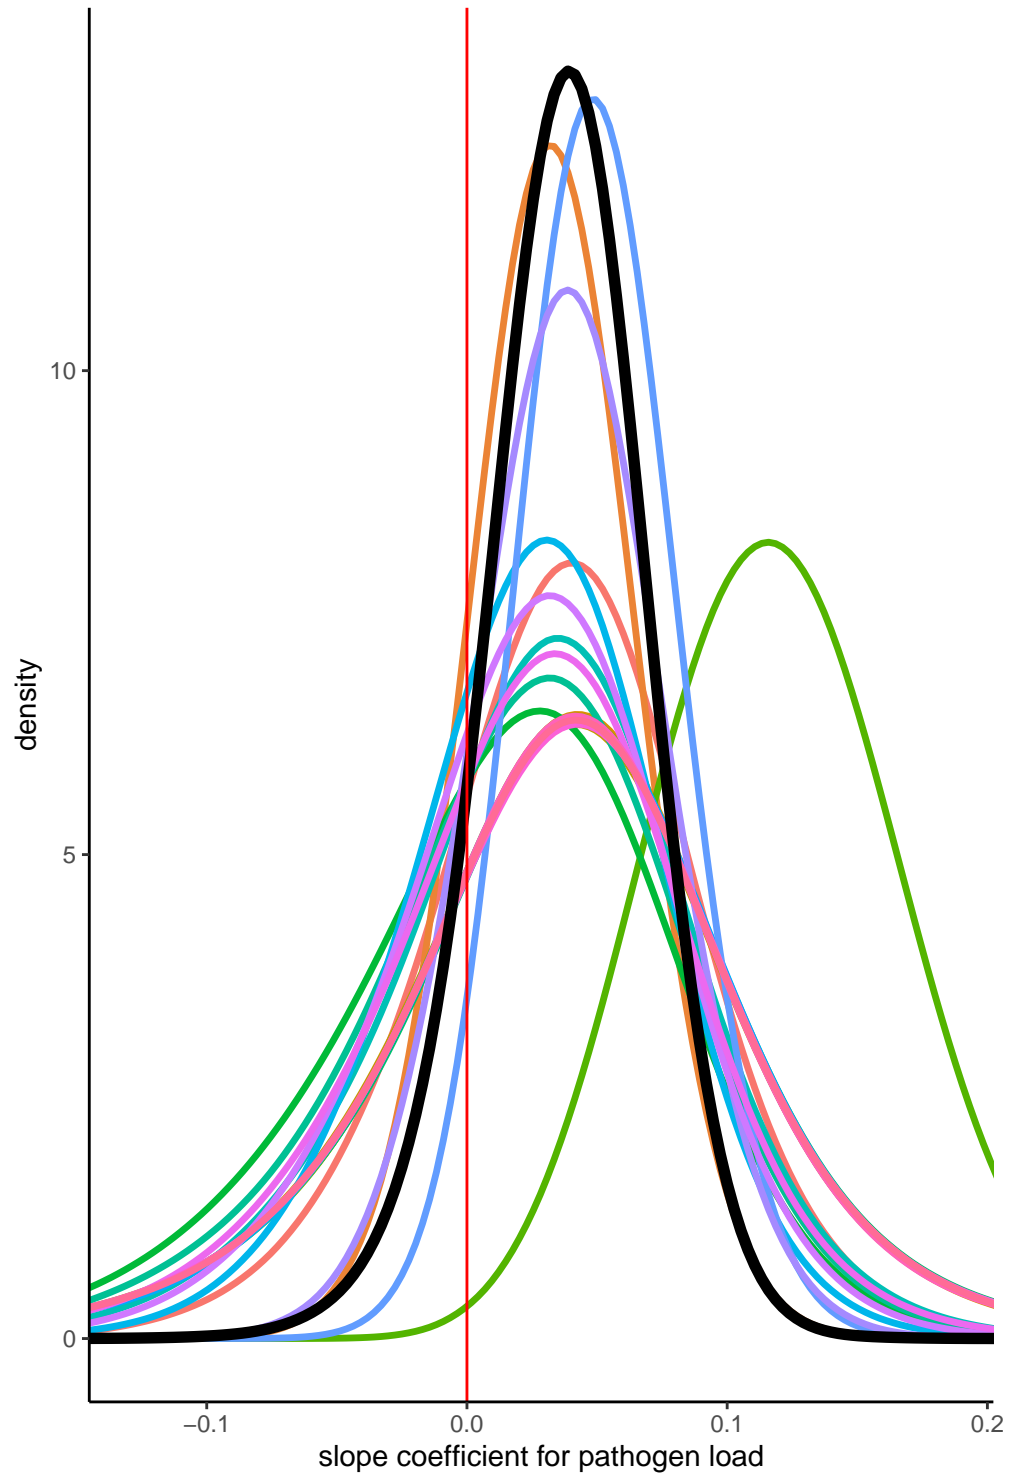

*Cryptobia salmositica* SpSu

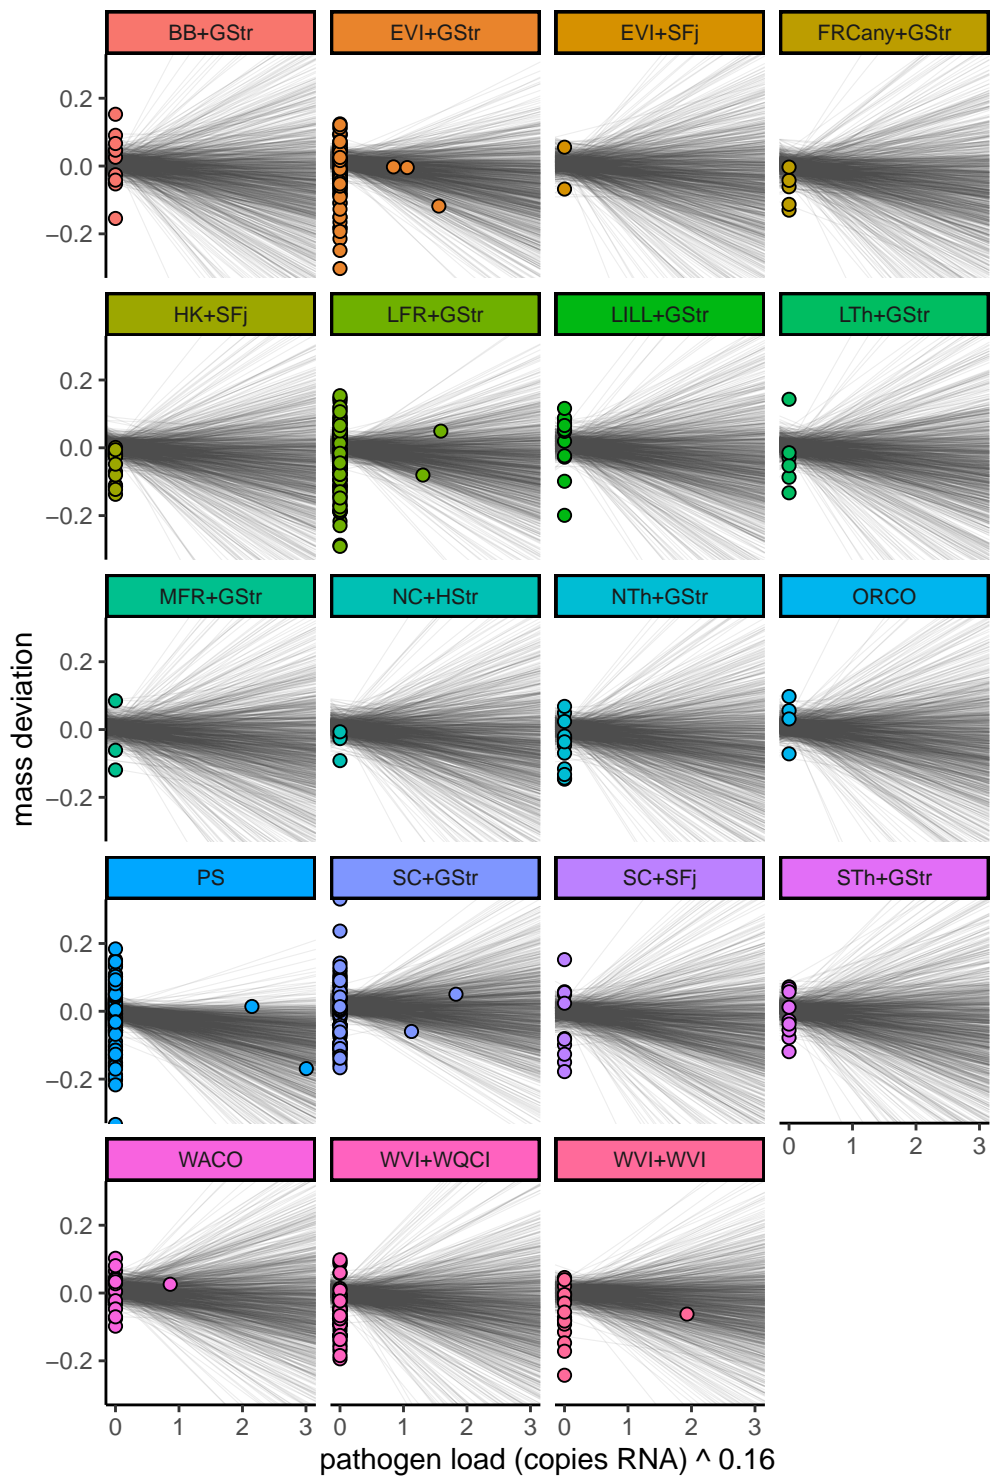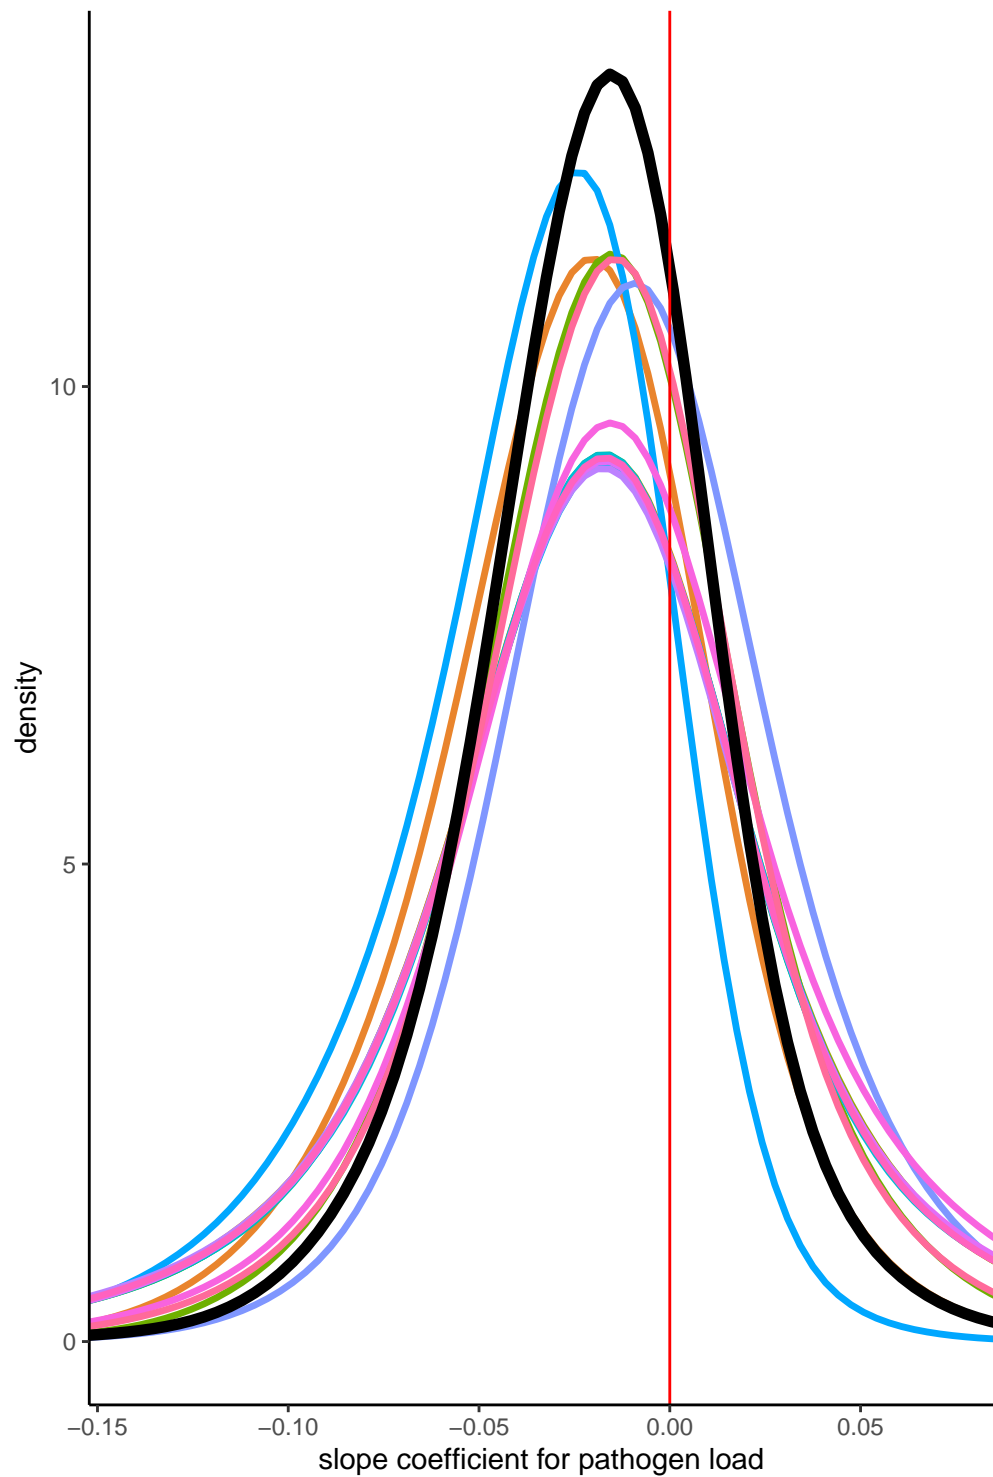

Facilispora margolisi SpSu

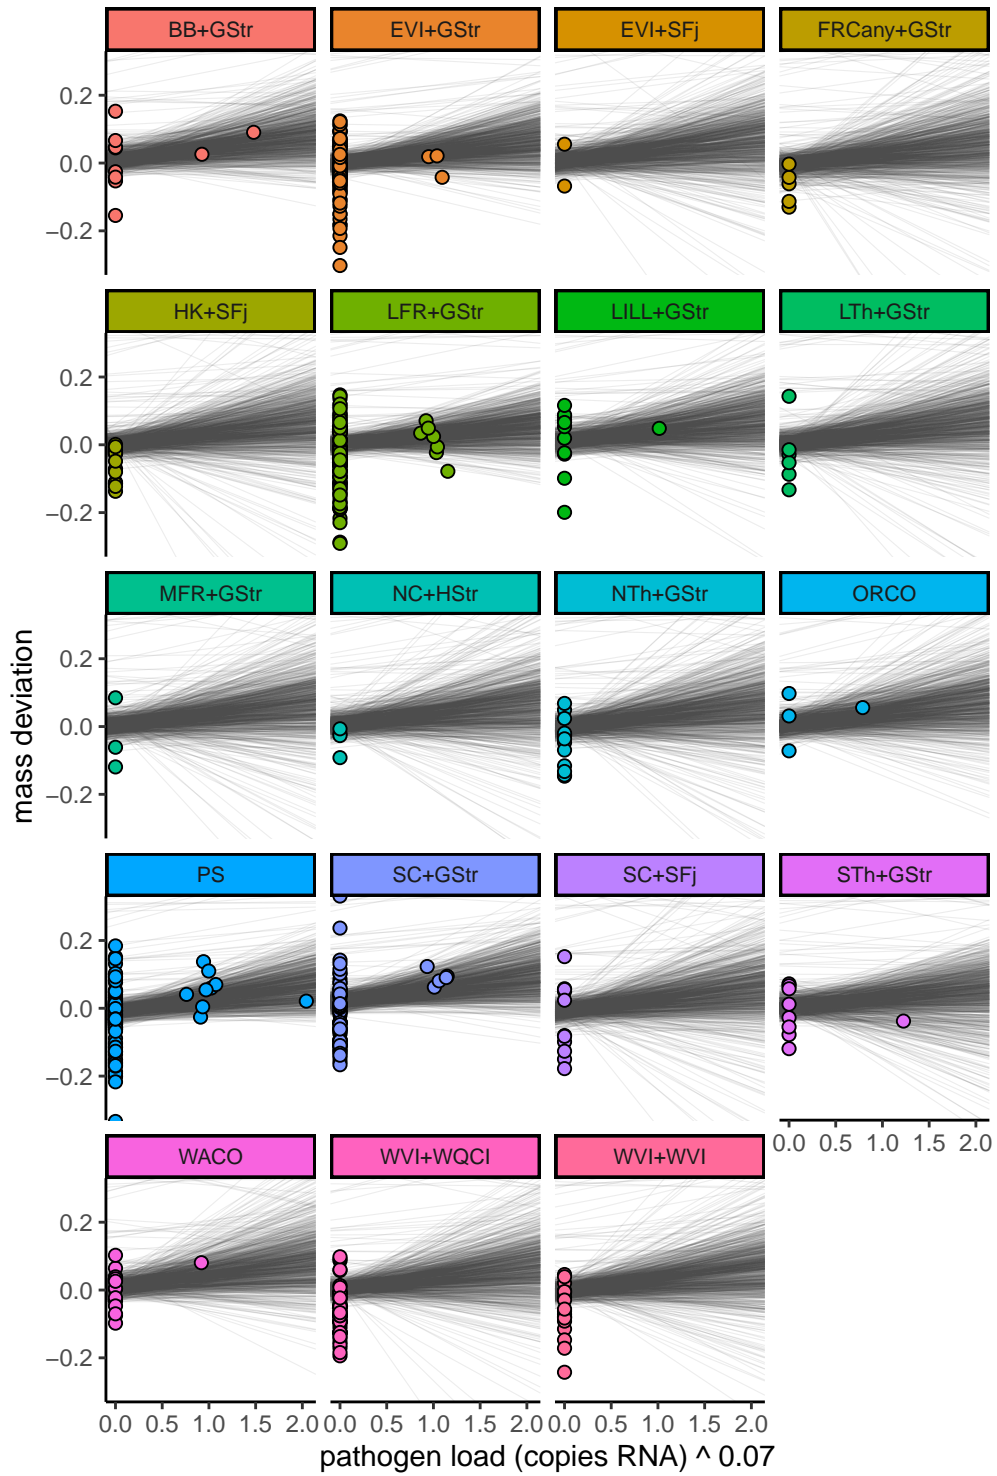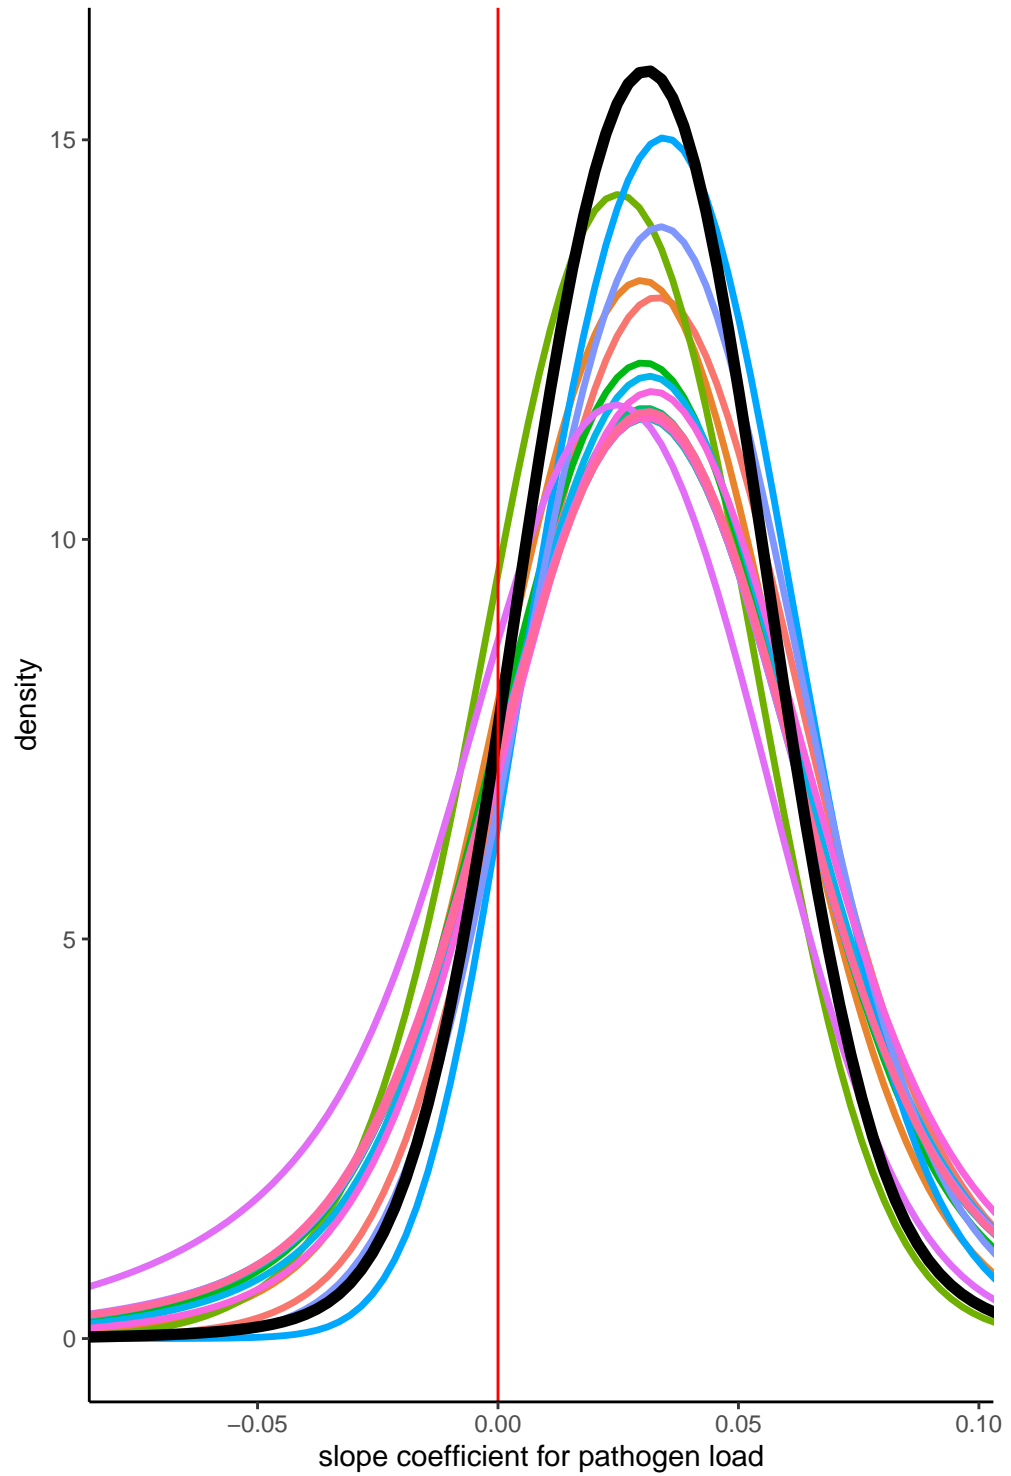

Facilispora margolisi FaWi

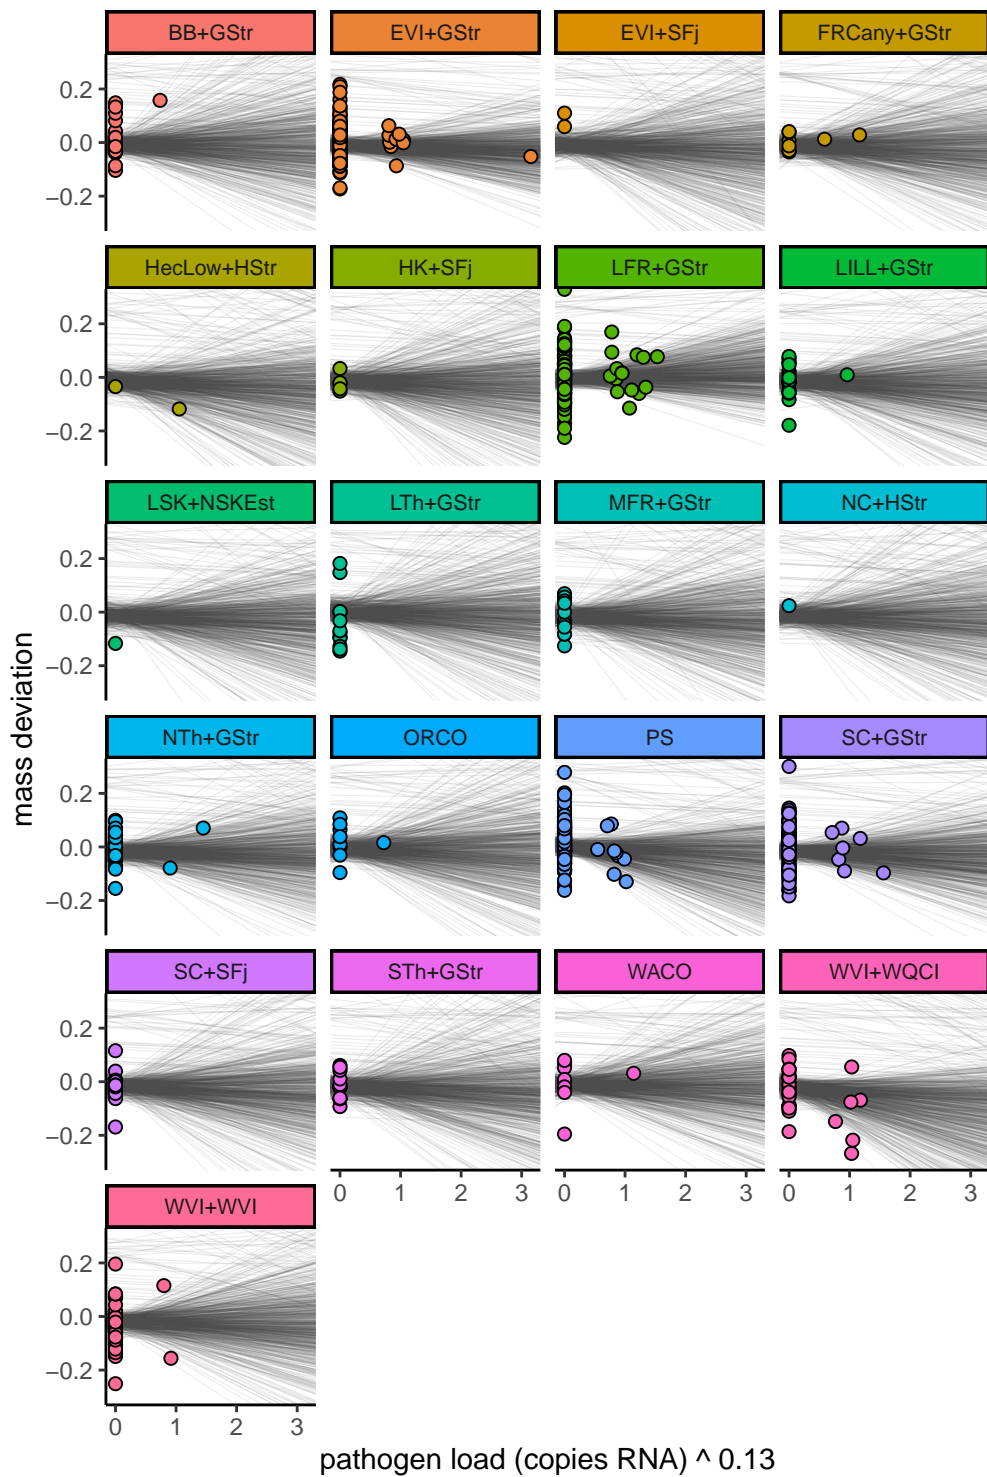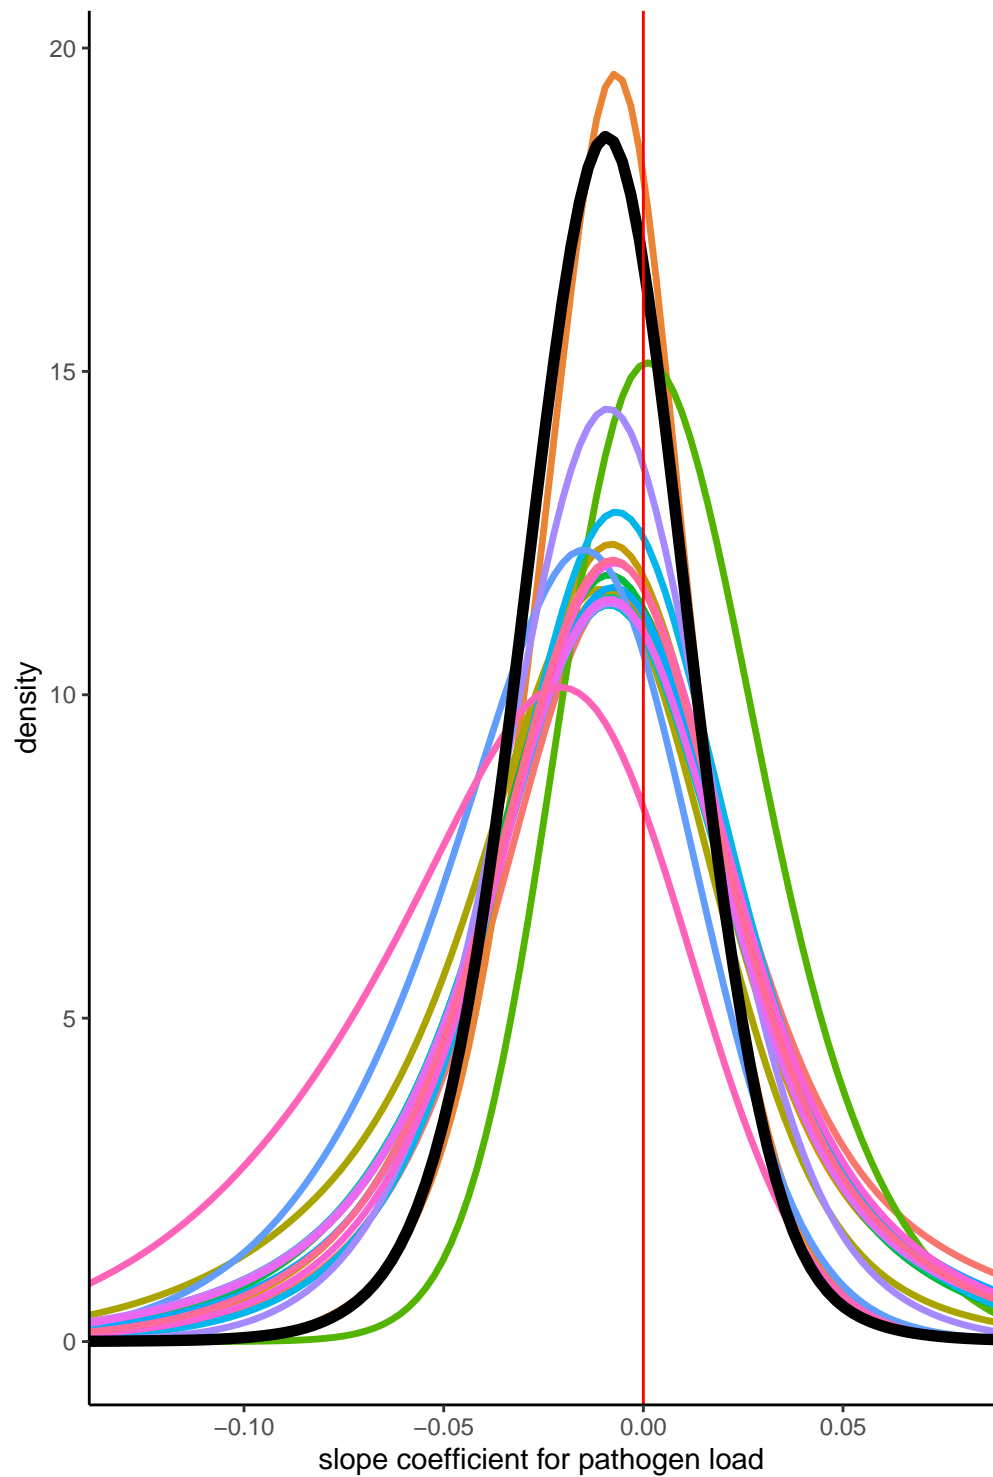



Flavobacterium psychrophilum SpSu

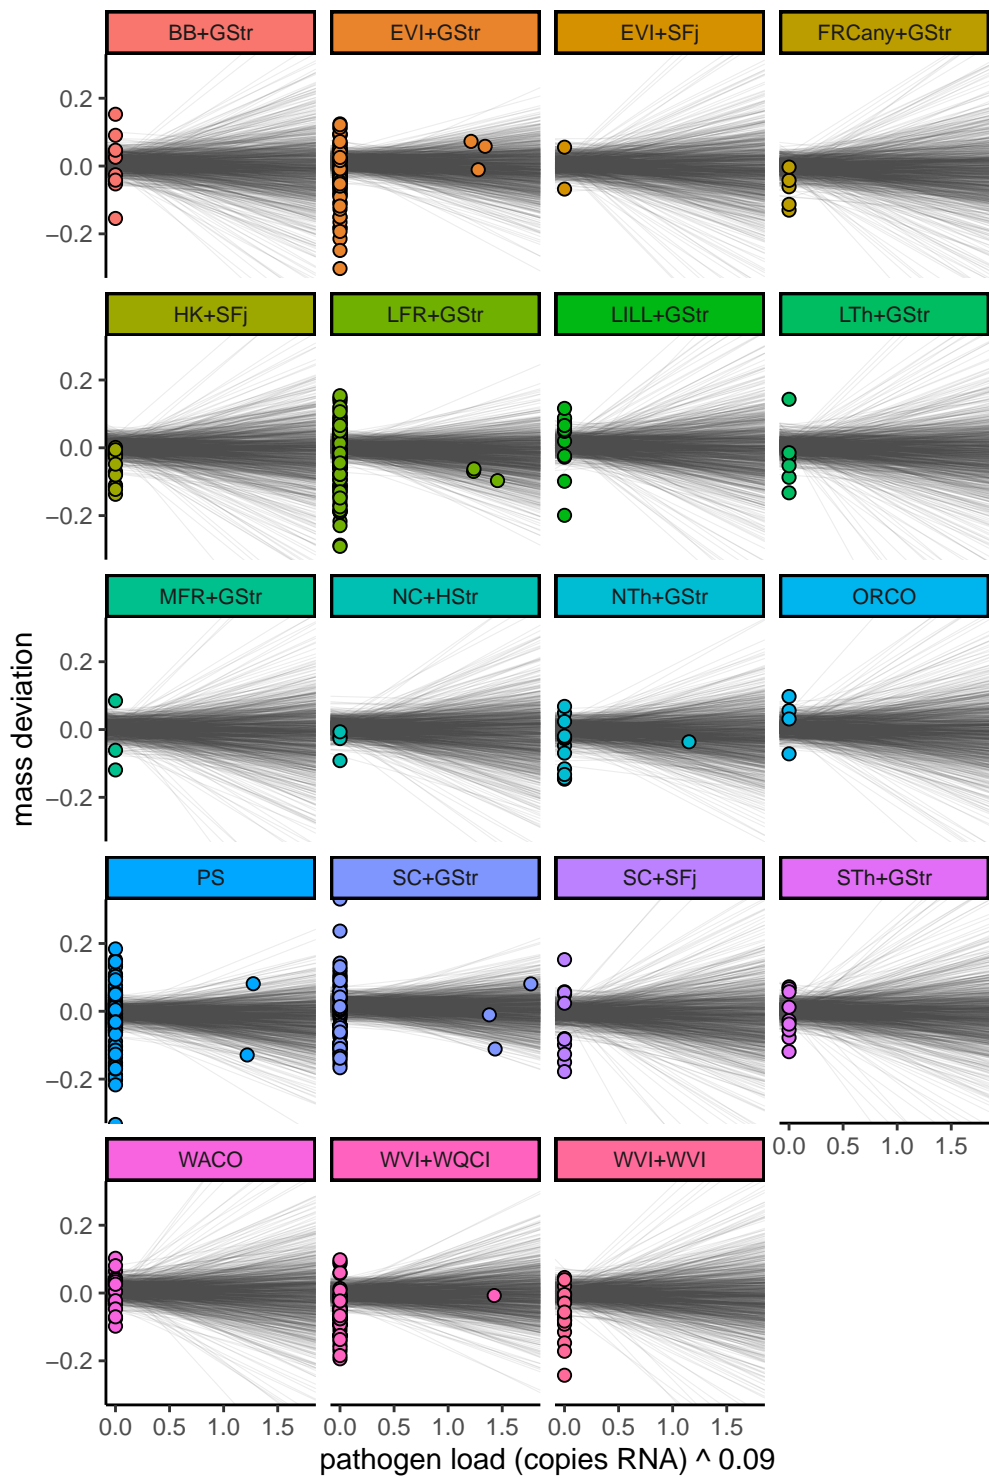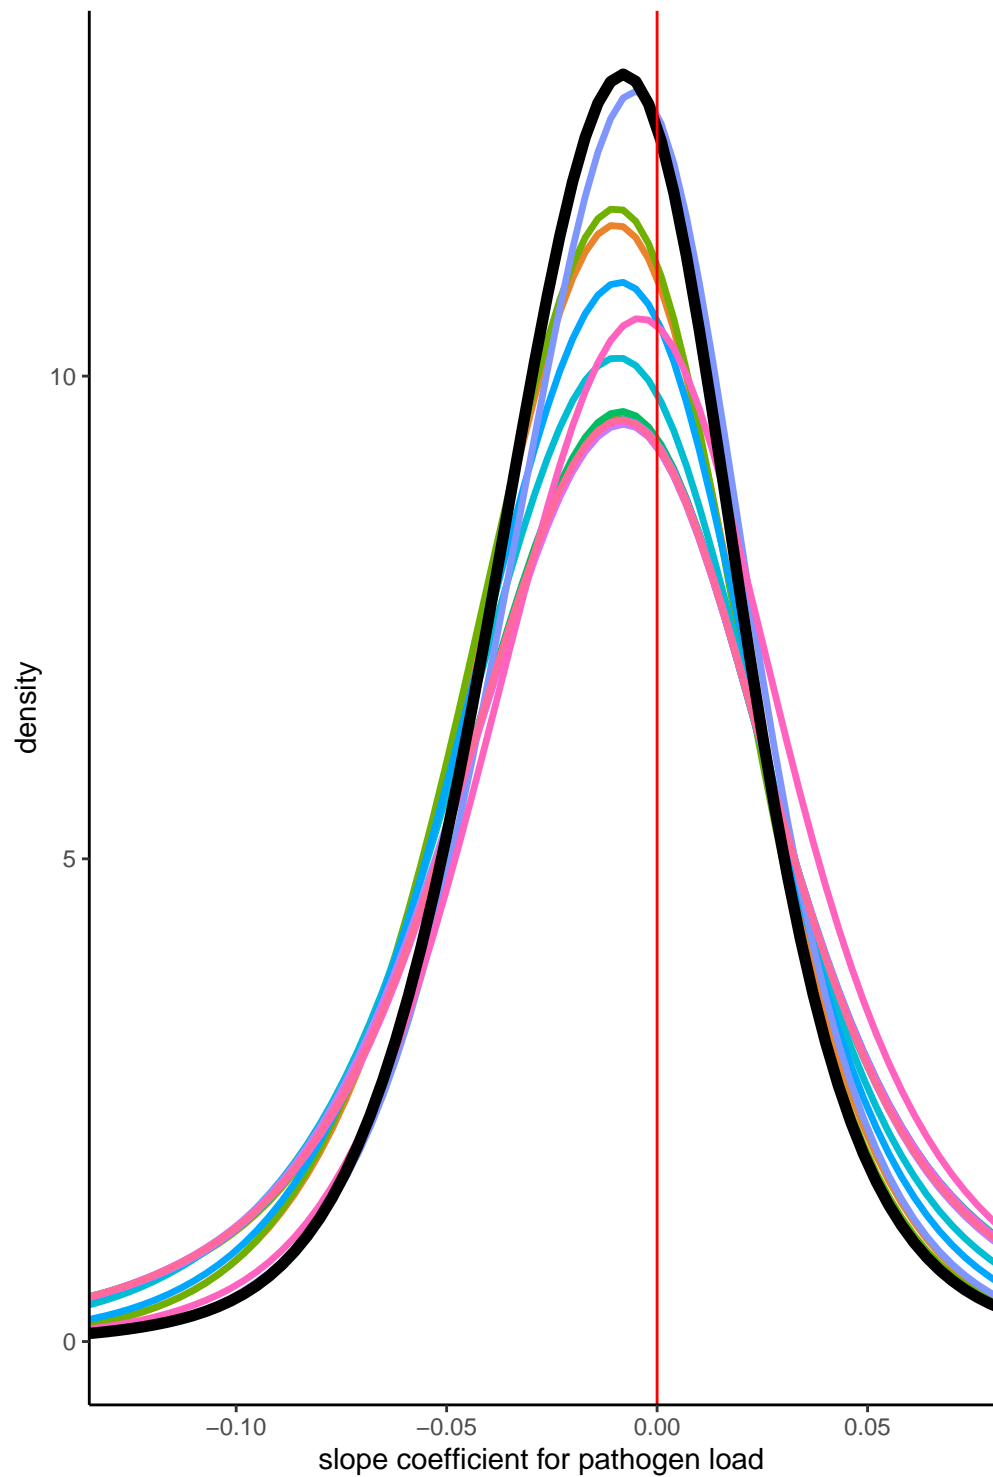

Flavobacterium psychrophilum FaWi

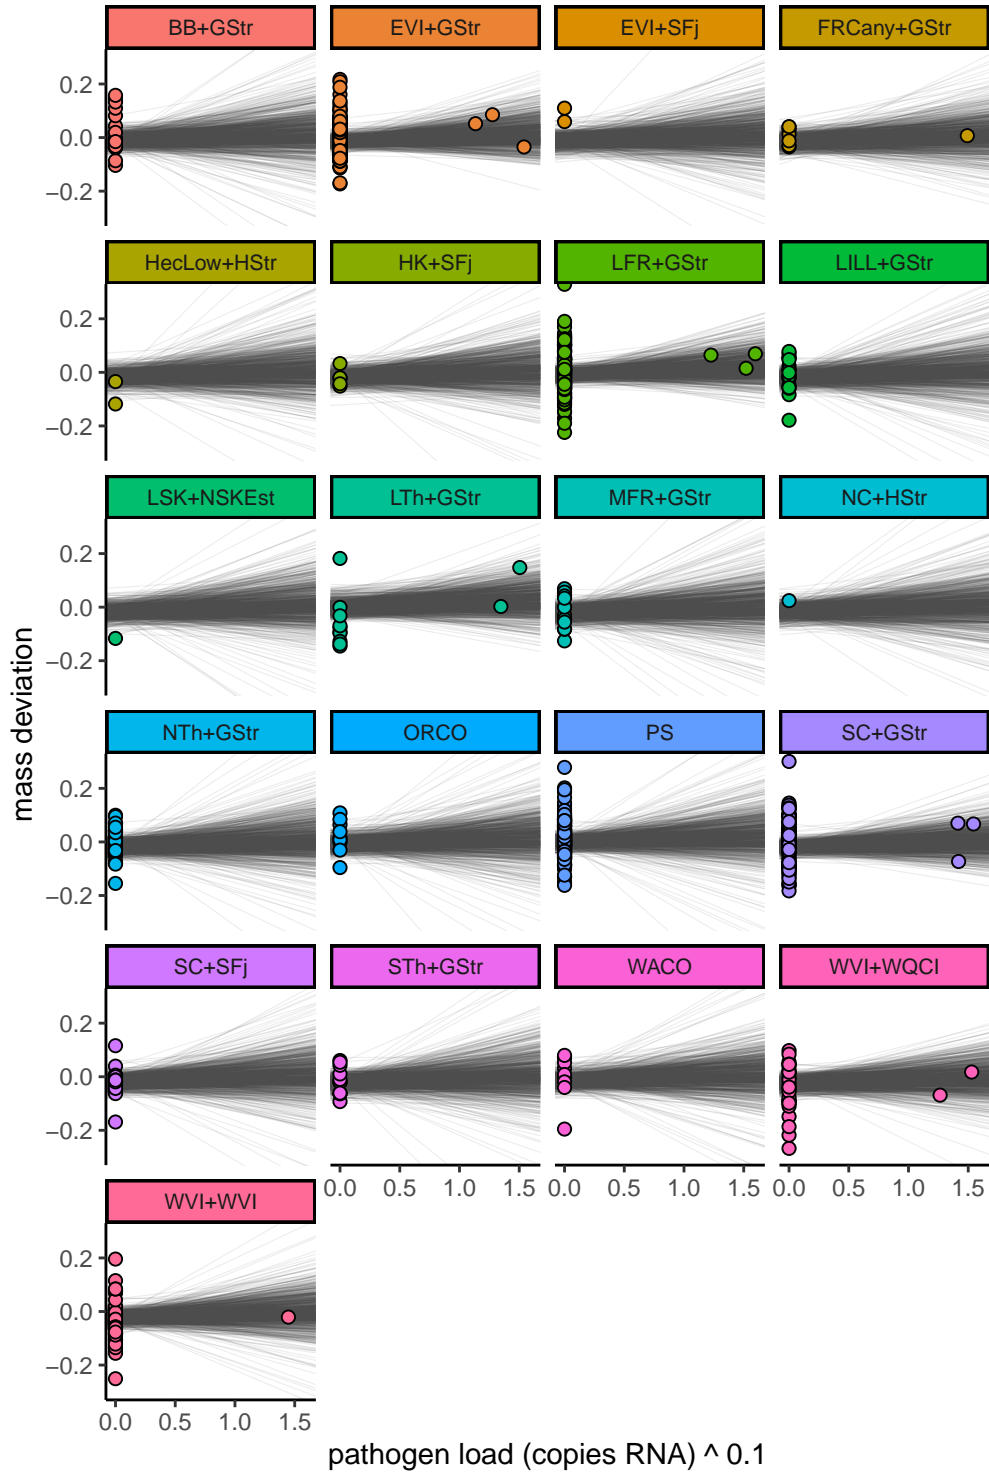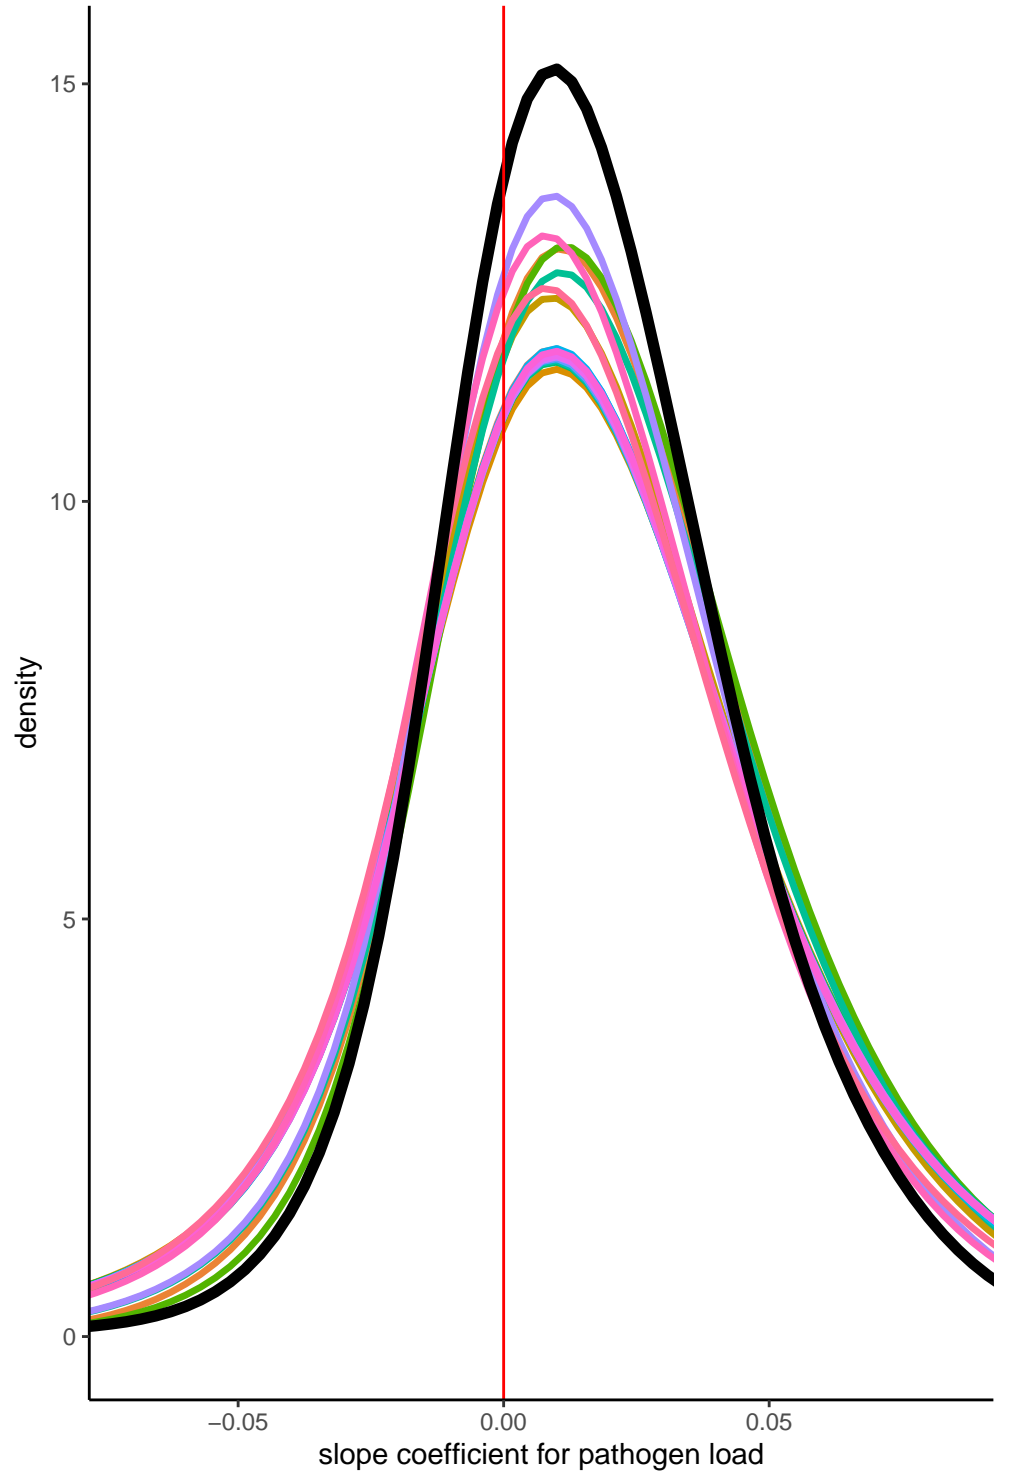

Ichthyophonus hoferi SpSu

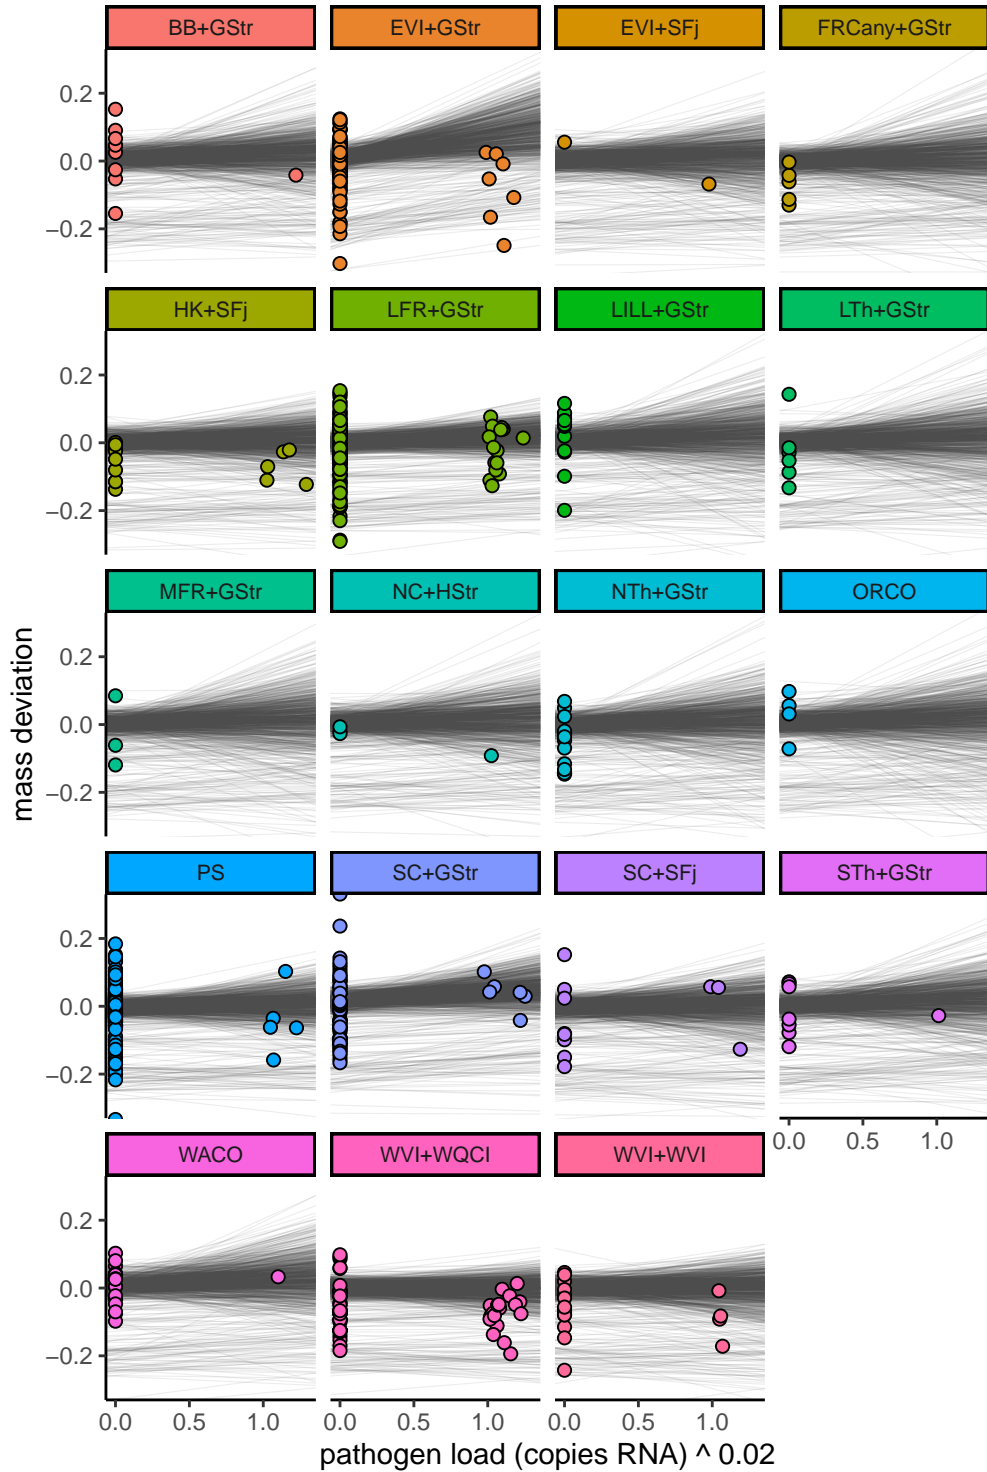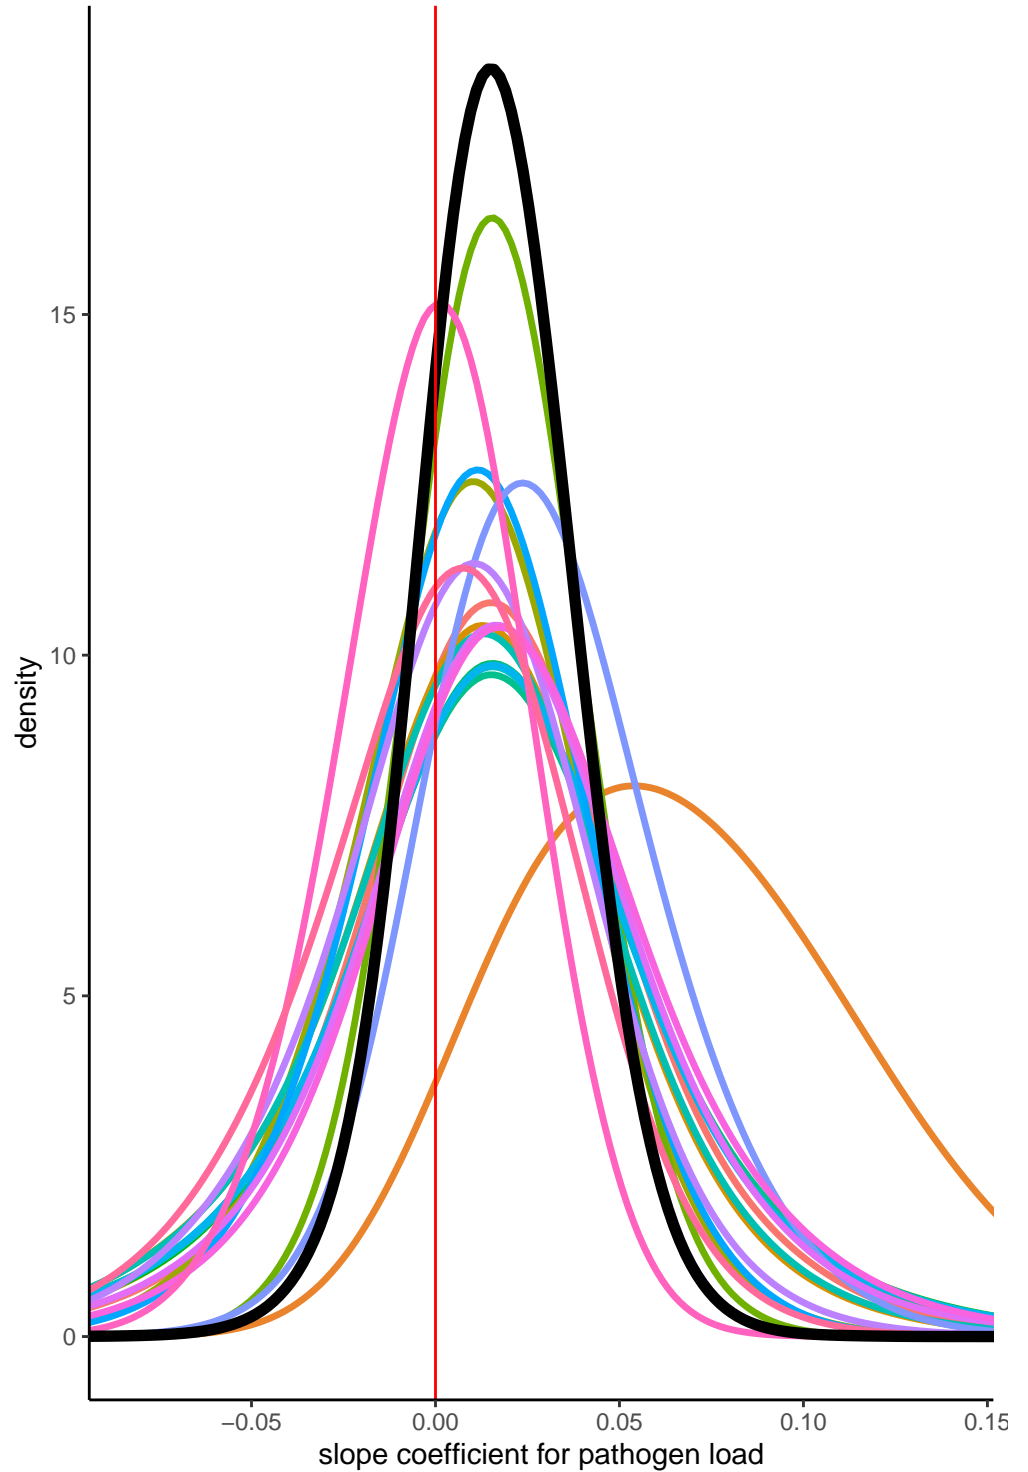

Ichthyophonus hoferi FaWi

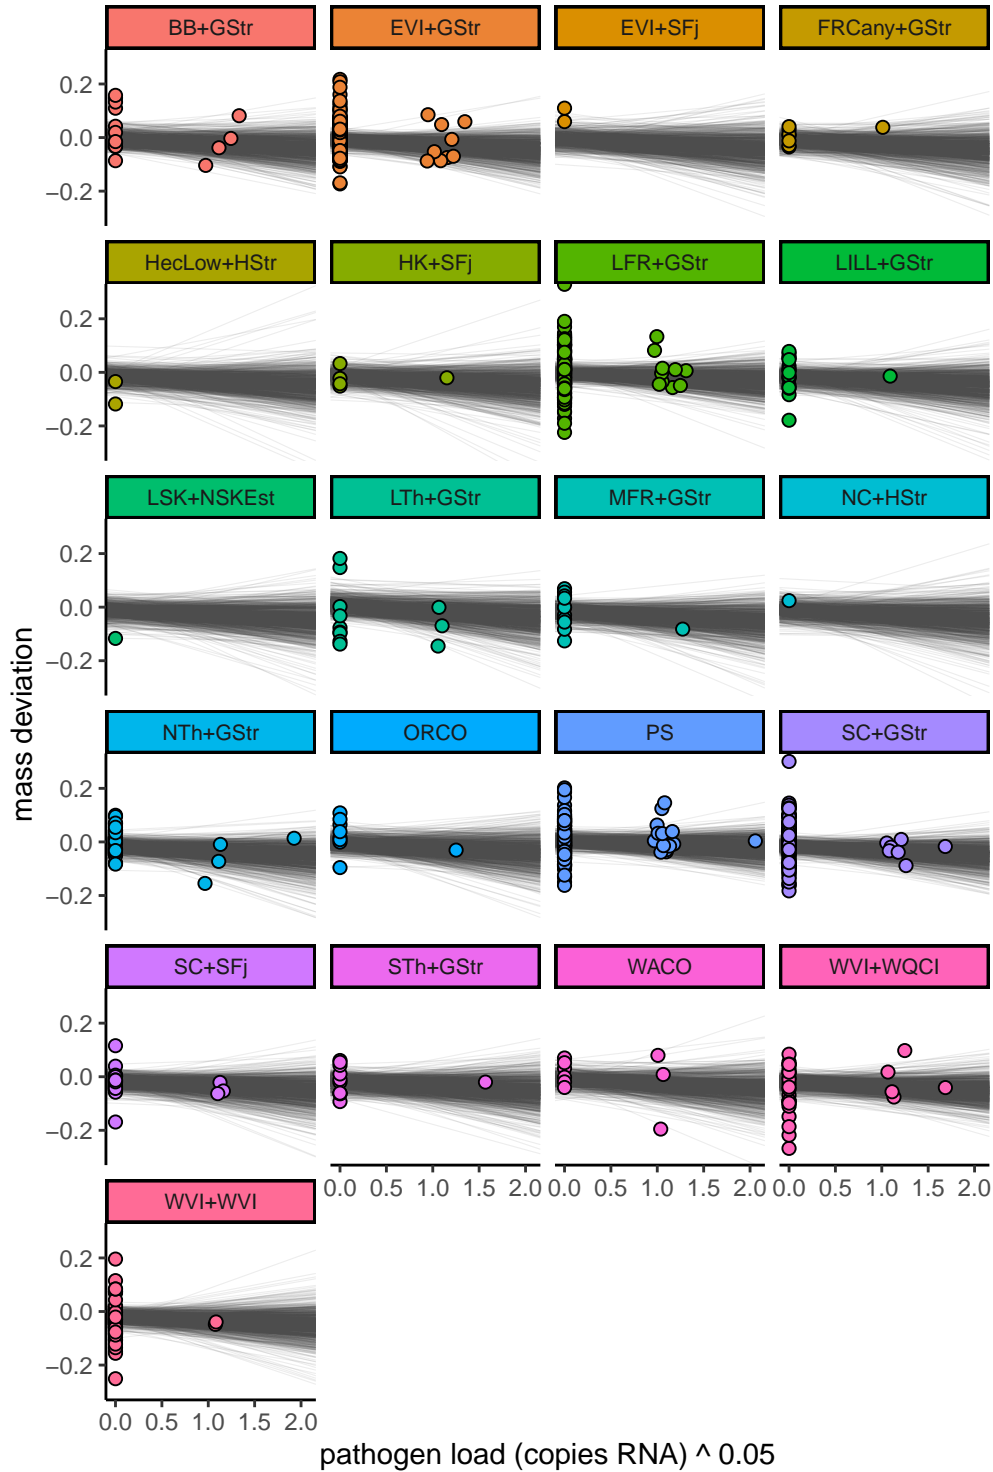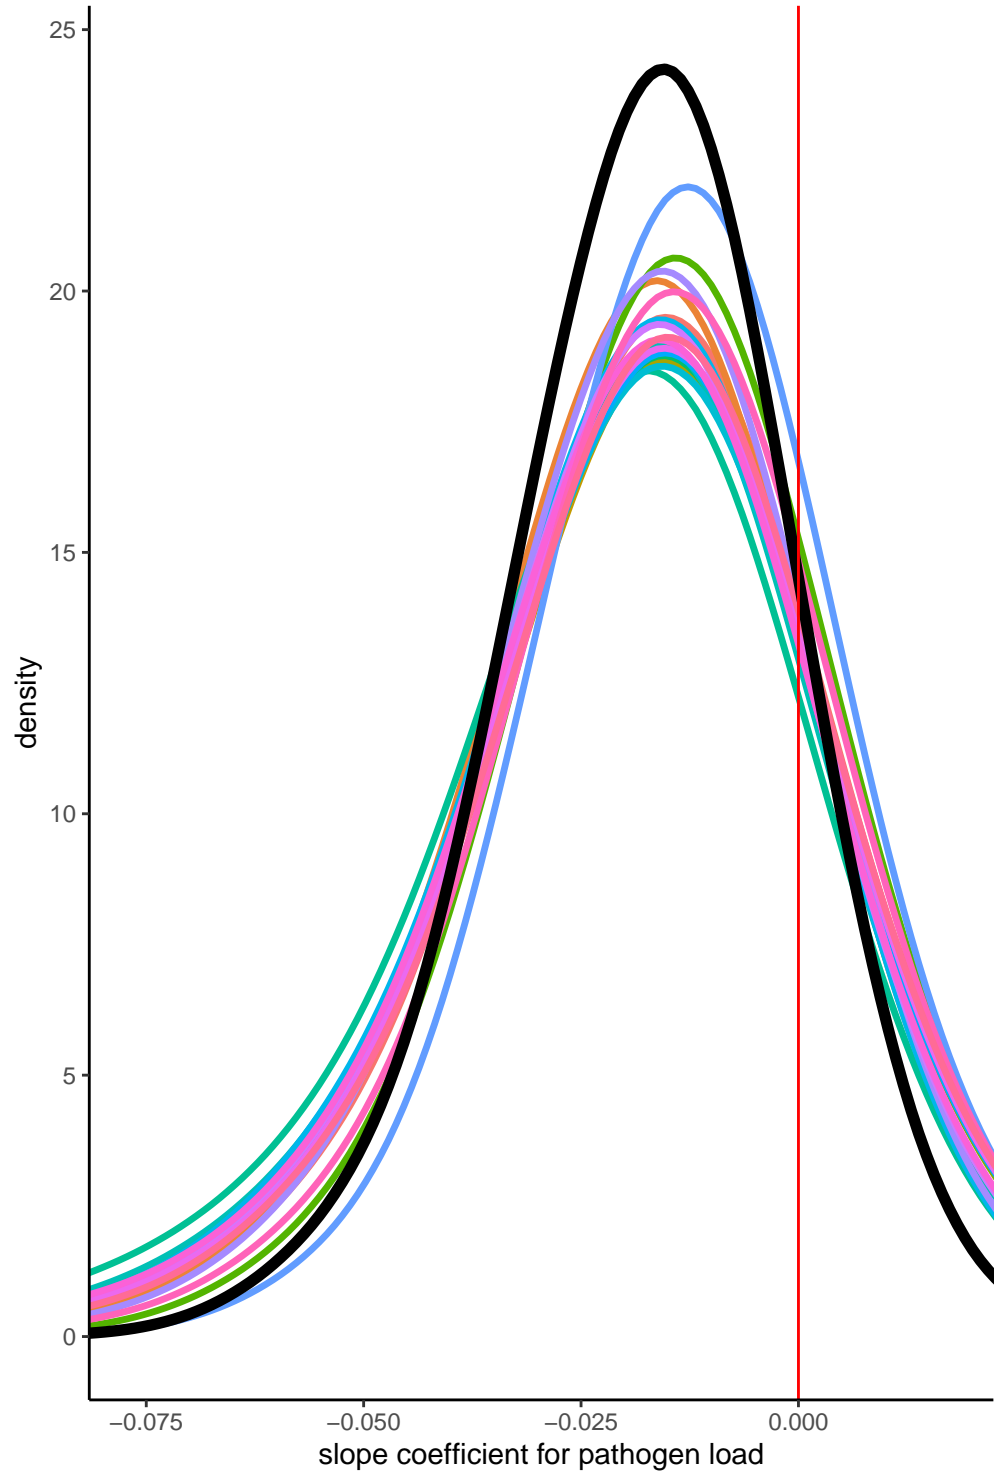

Ichthyophthirius multifiliis SpSu

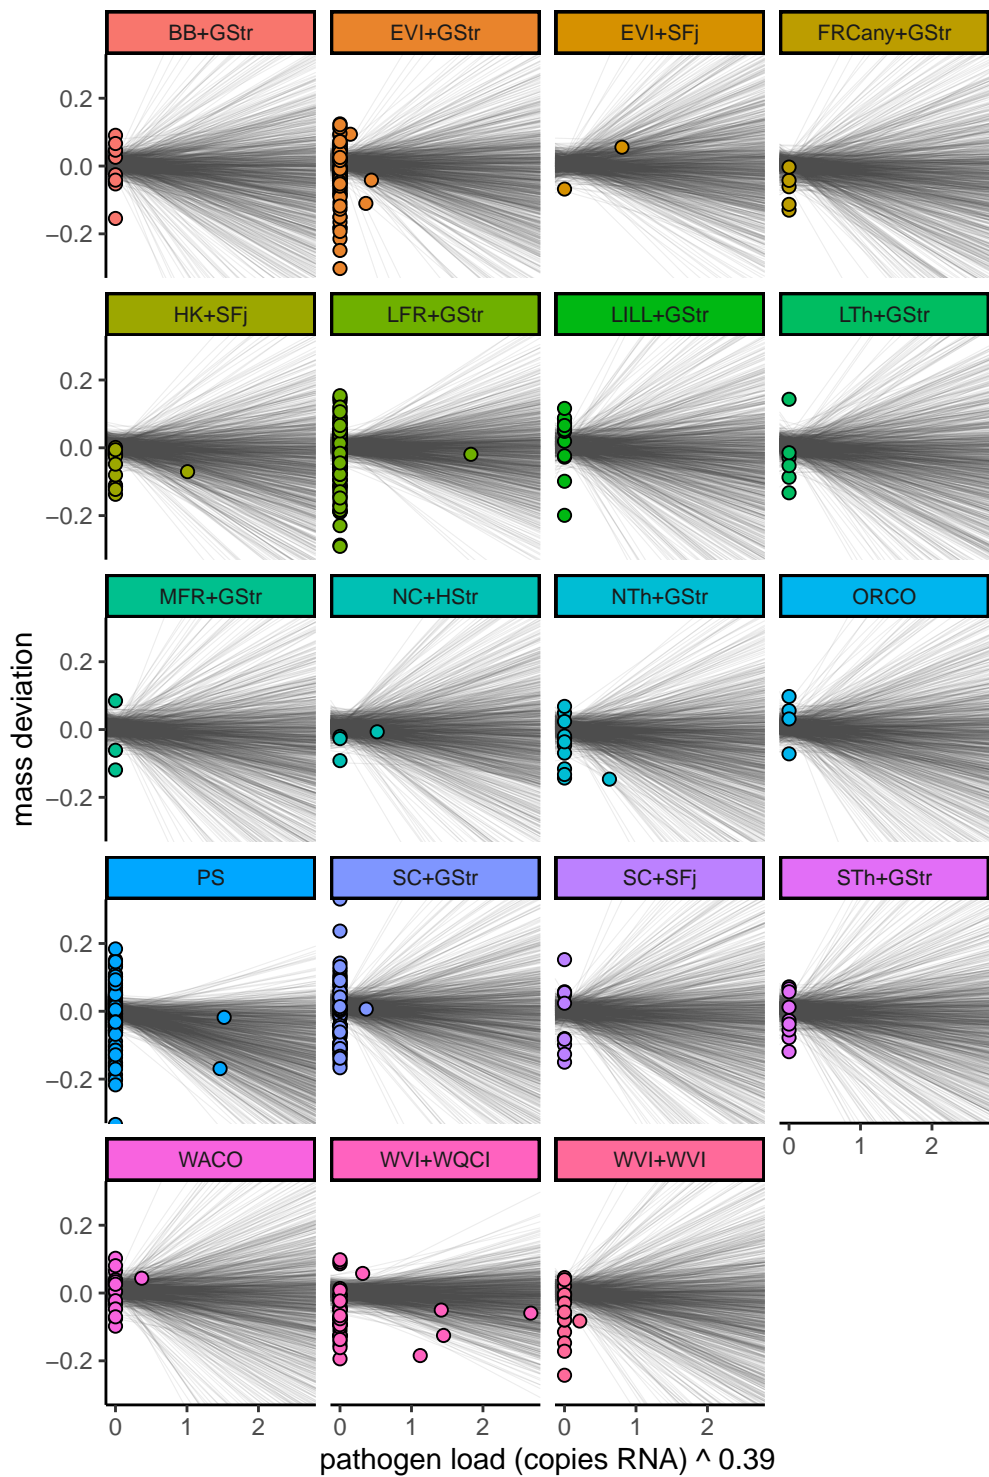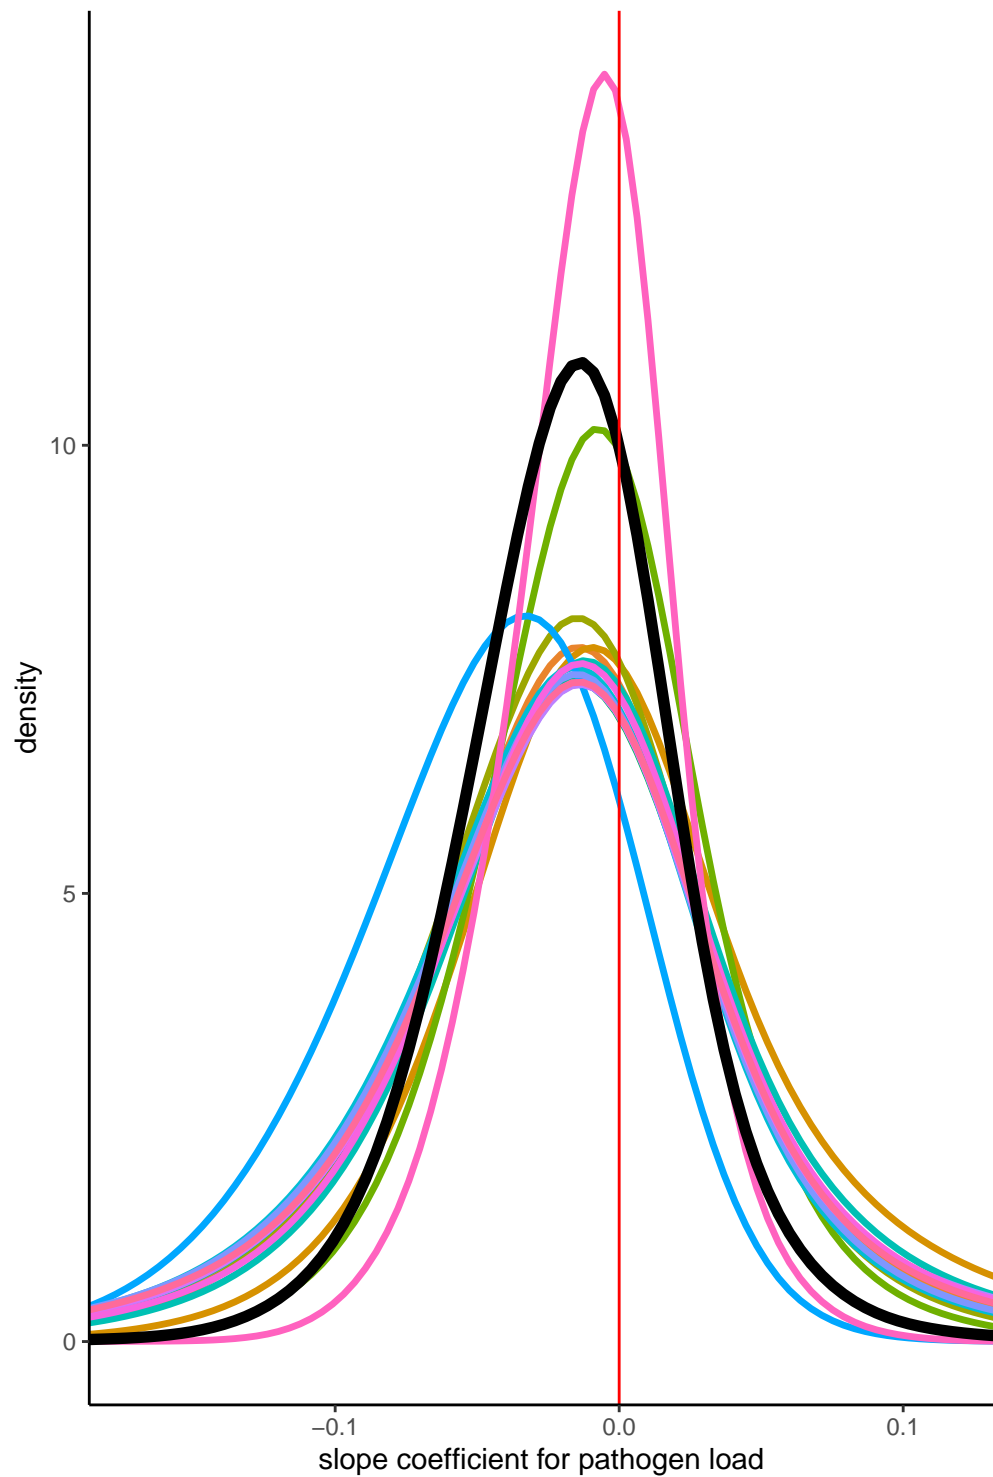

Ichthyophthirius multifiliis FaWi

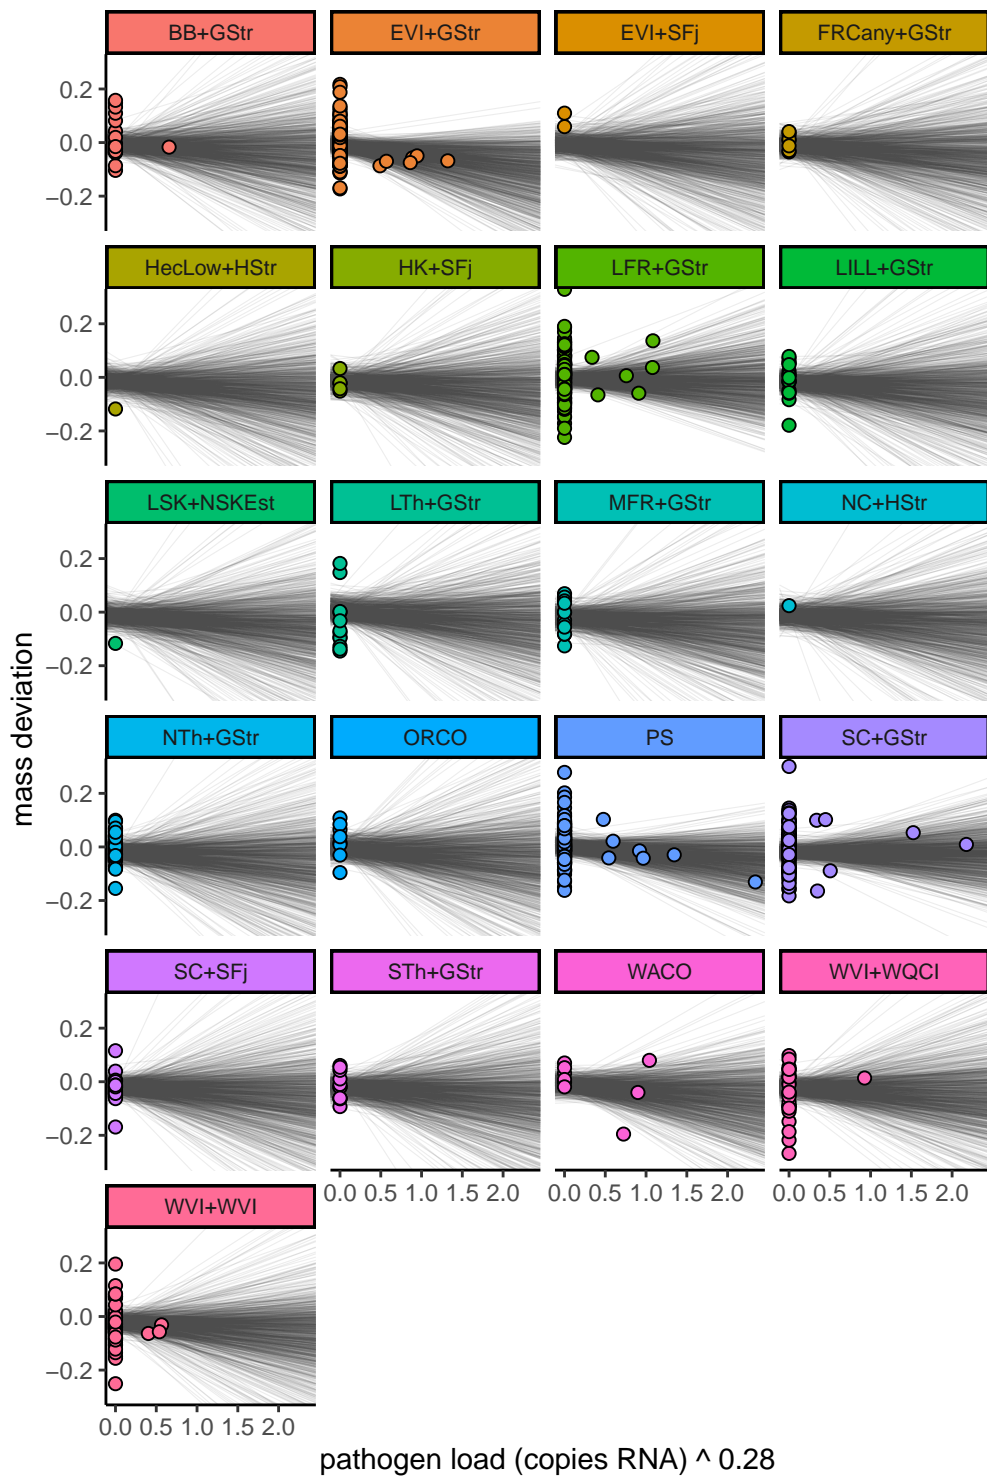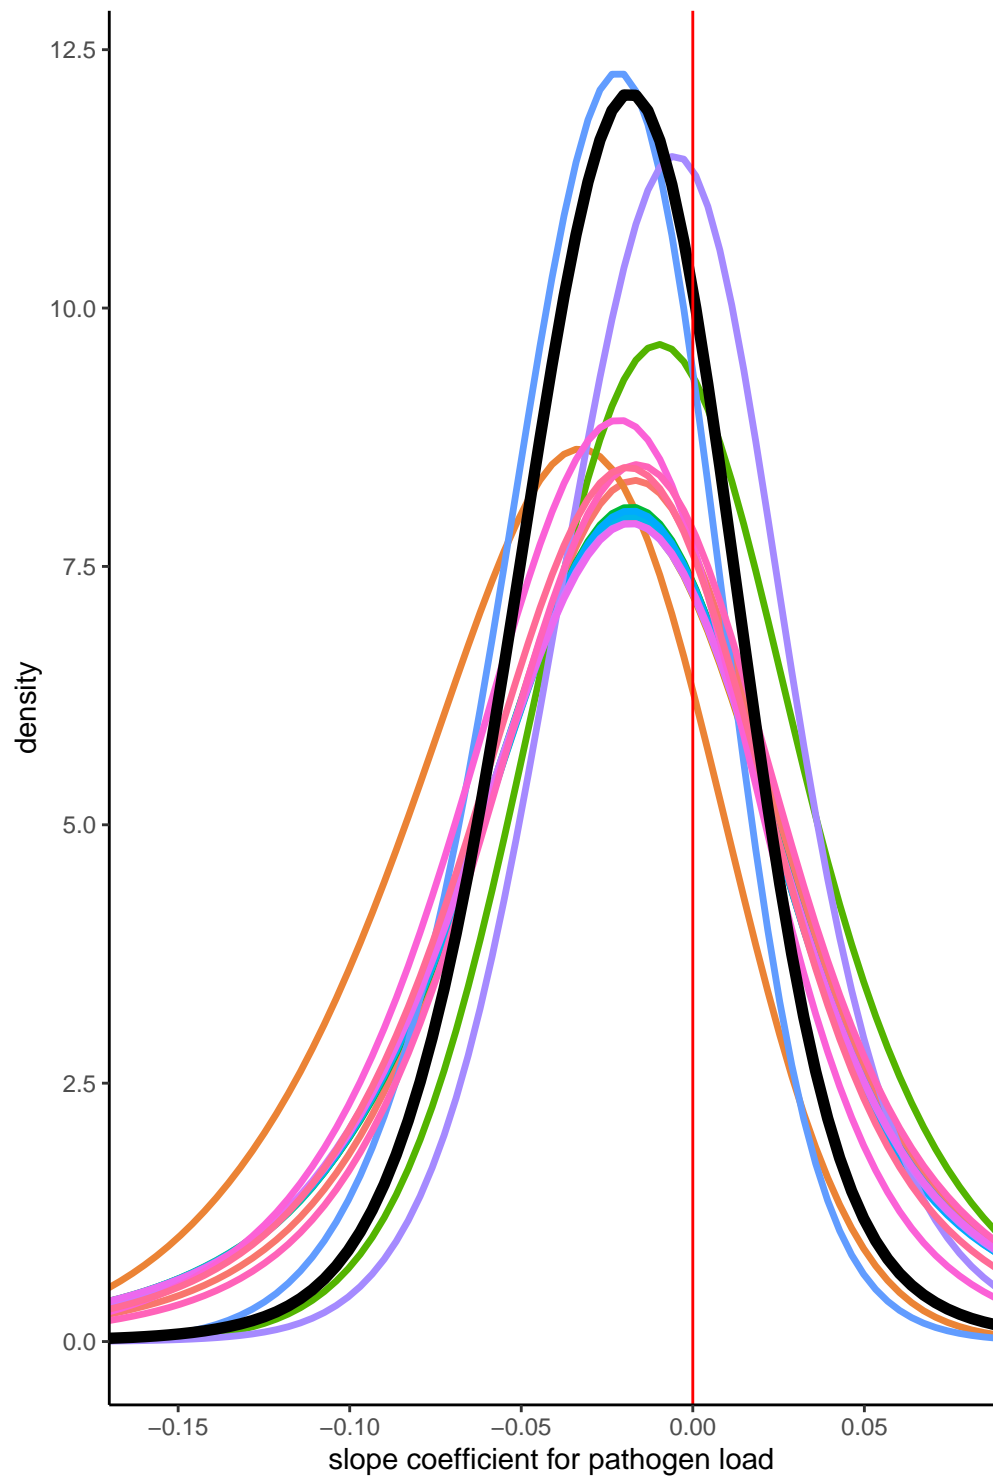

Kudoa thyr sites SpSu

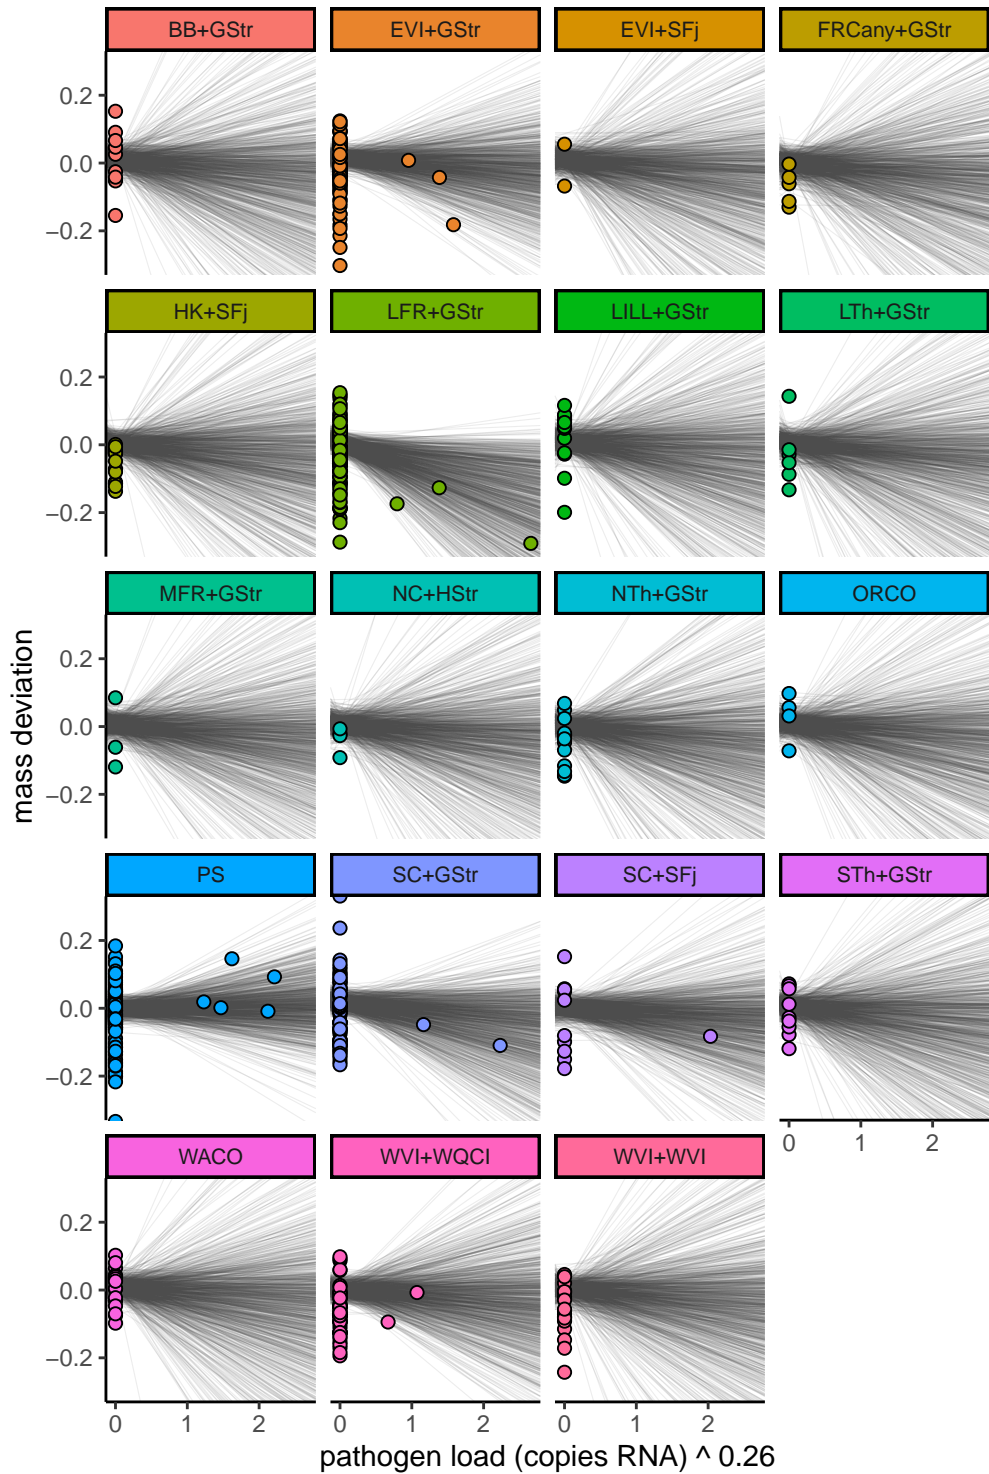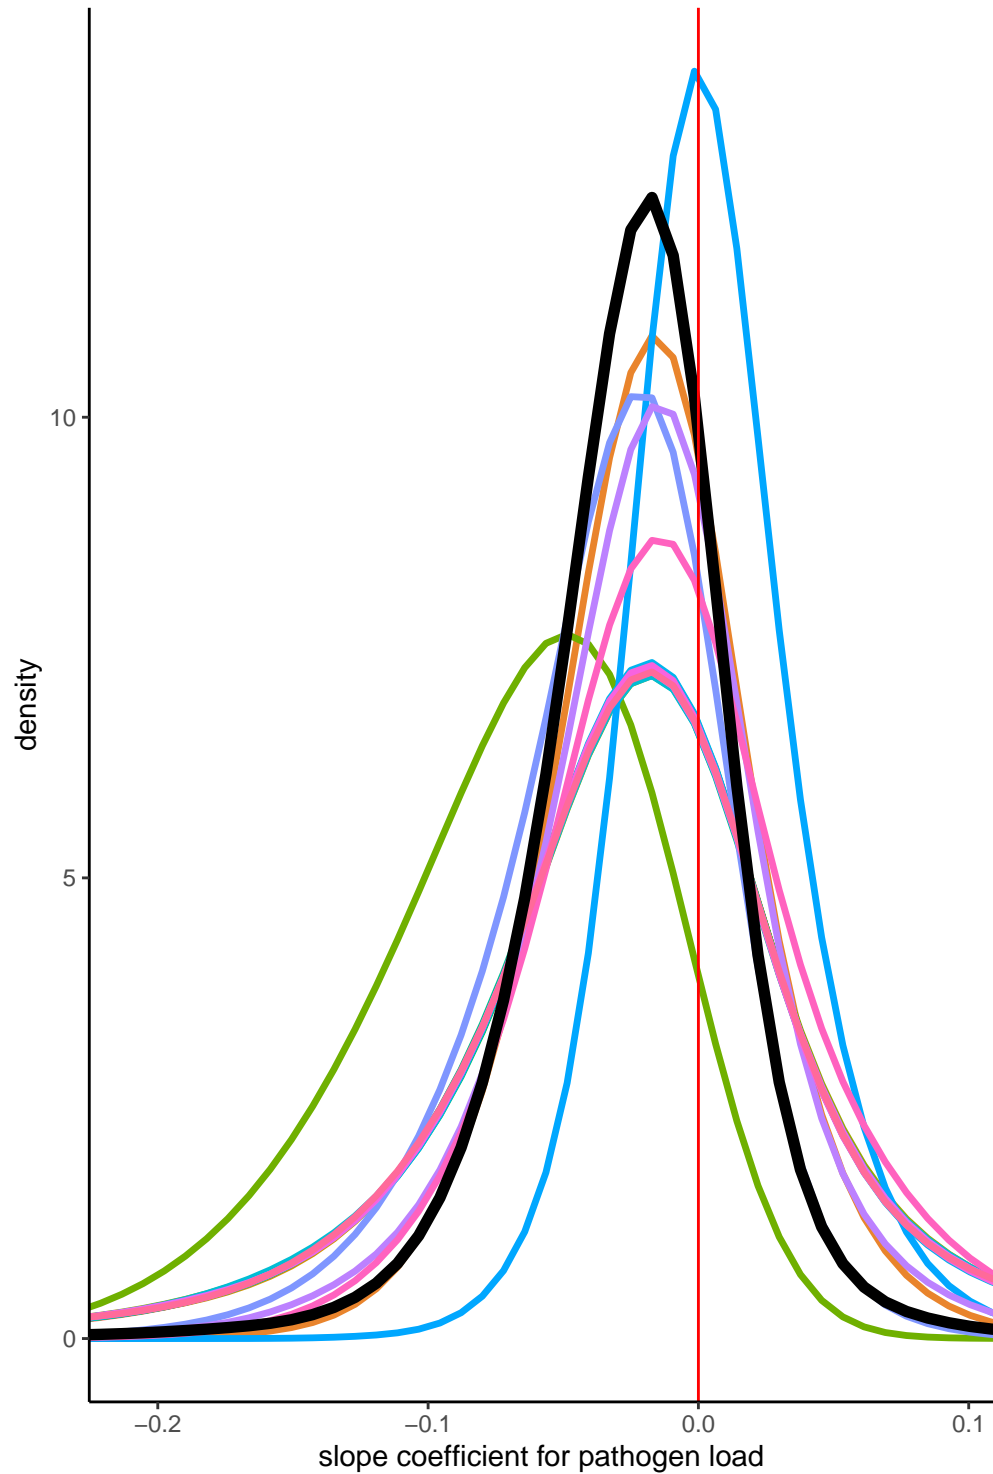

Kudoa thyr sites FaWi

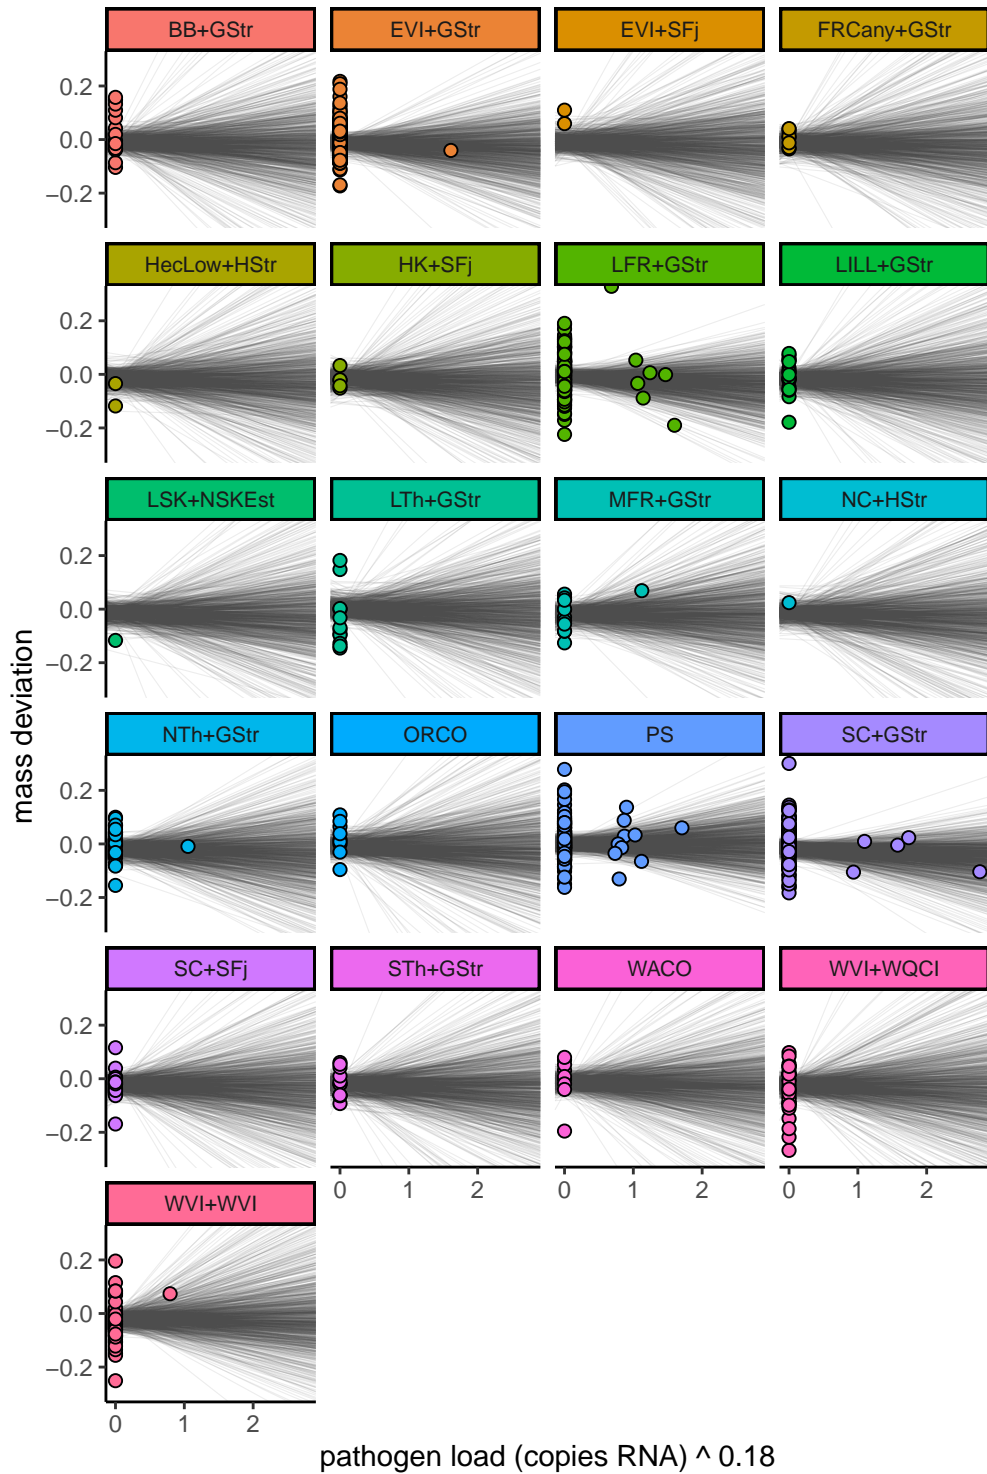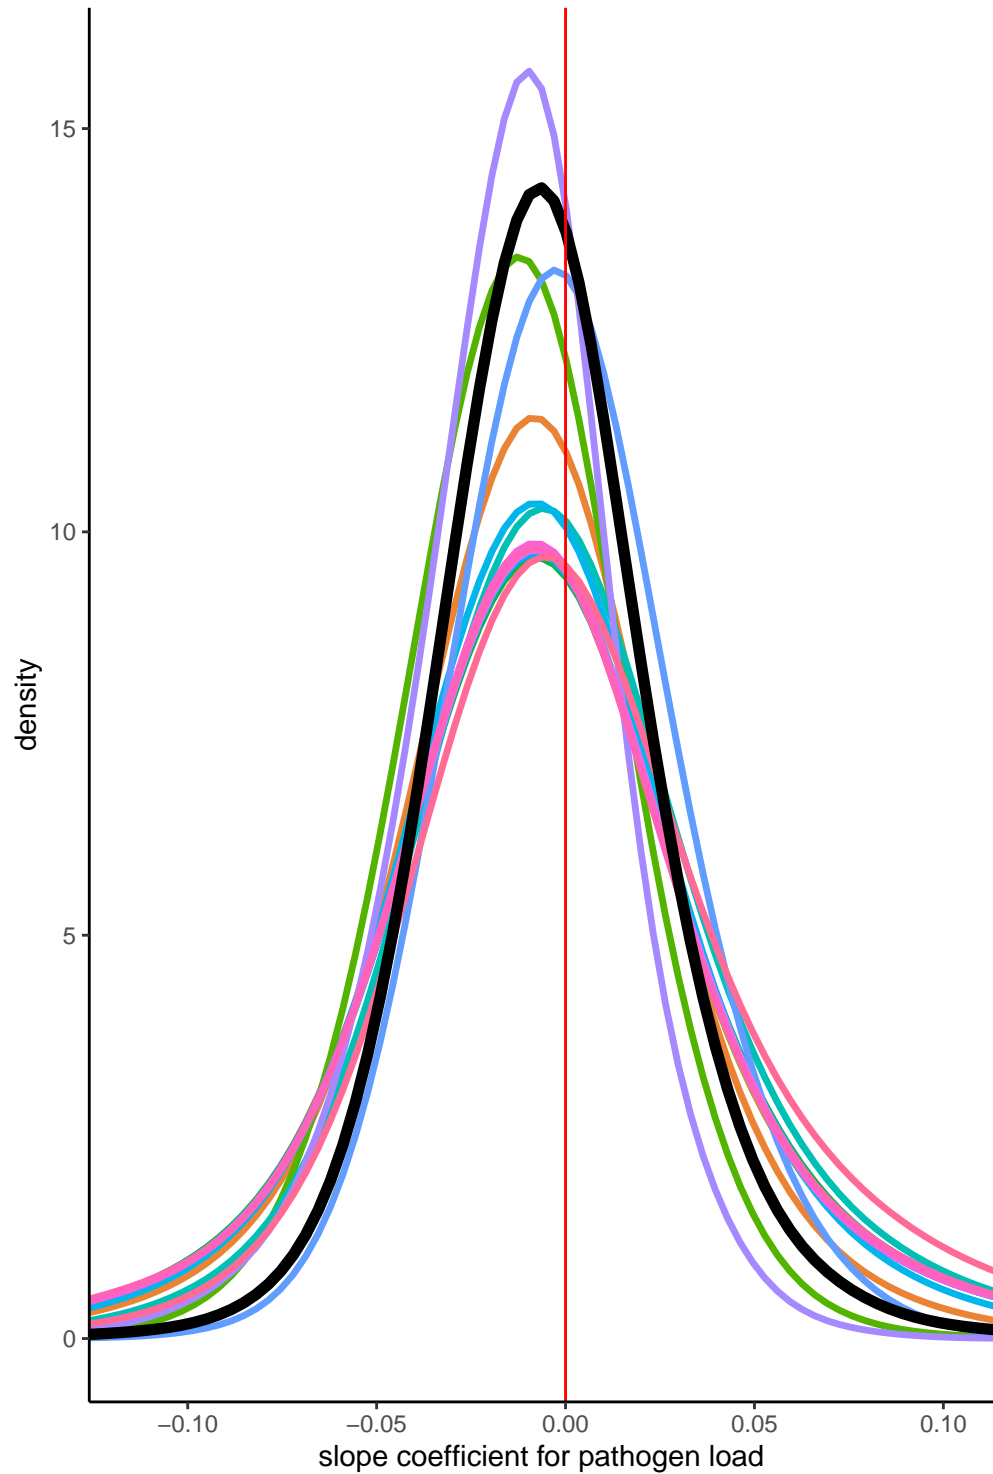



Loma salmonae SpSu

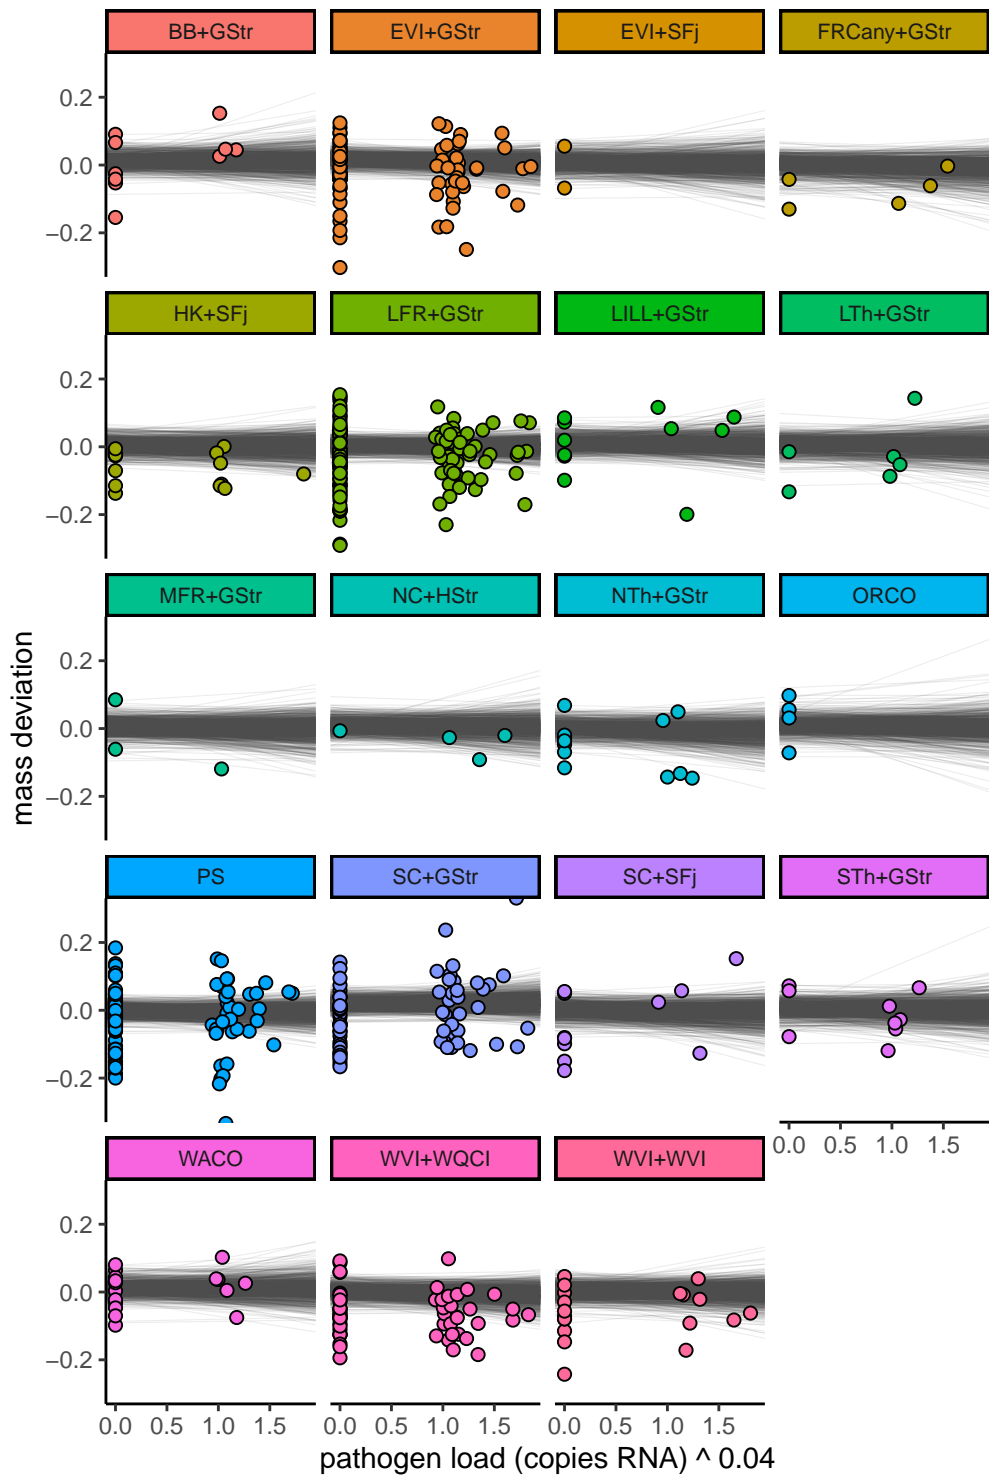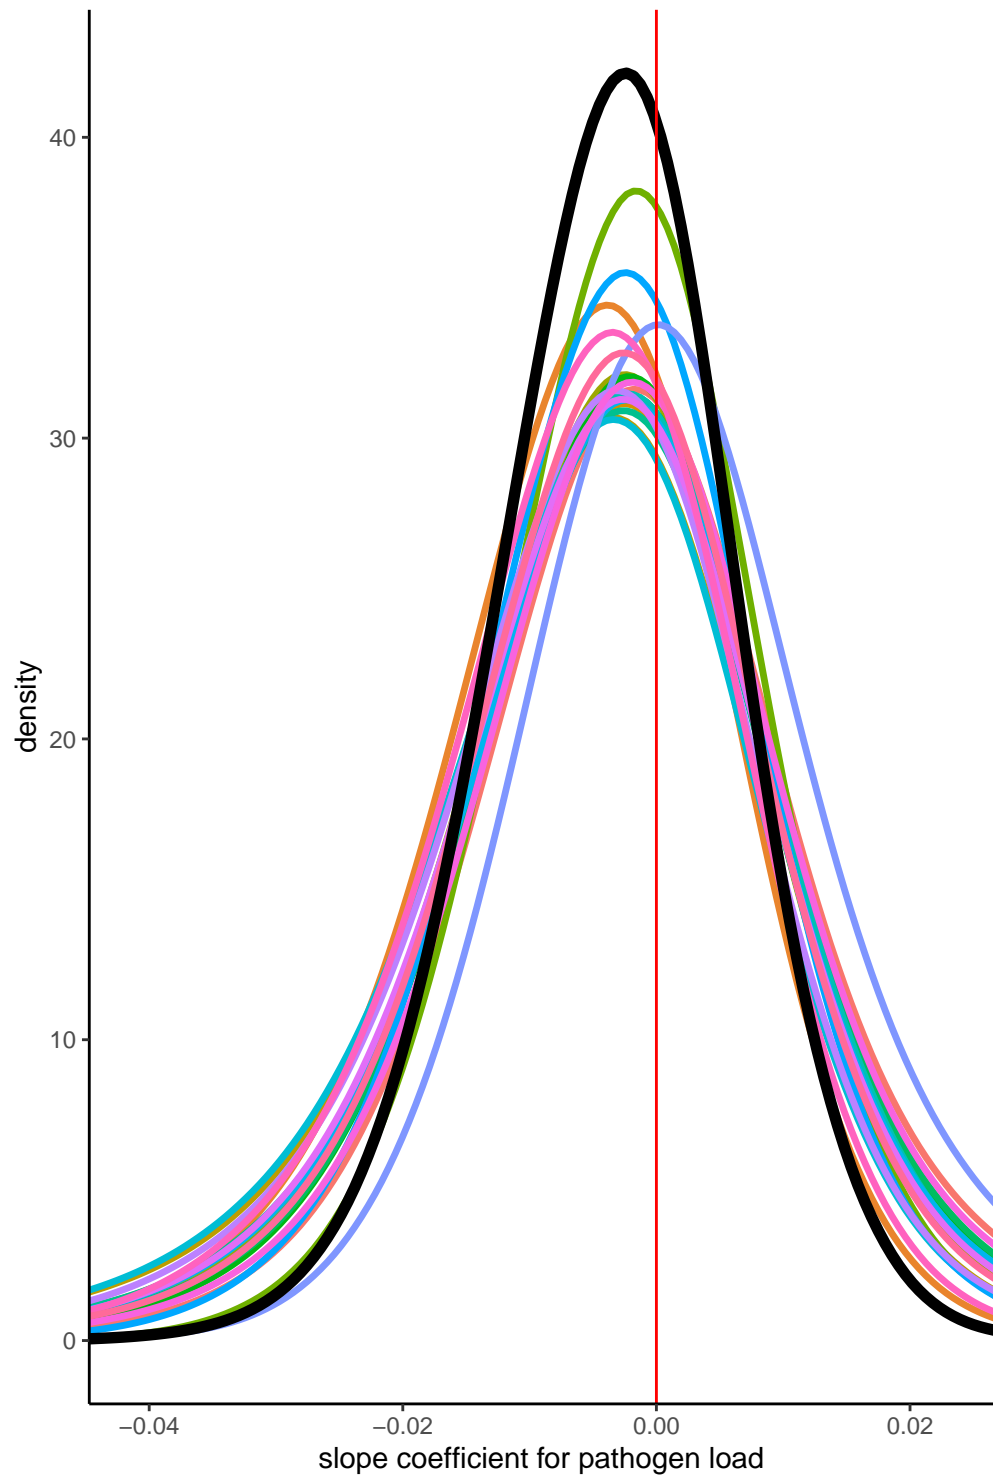

Loma salmonae FaWi

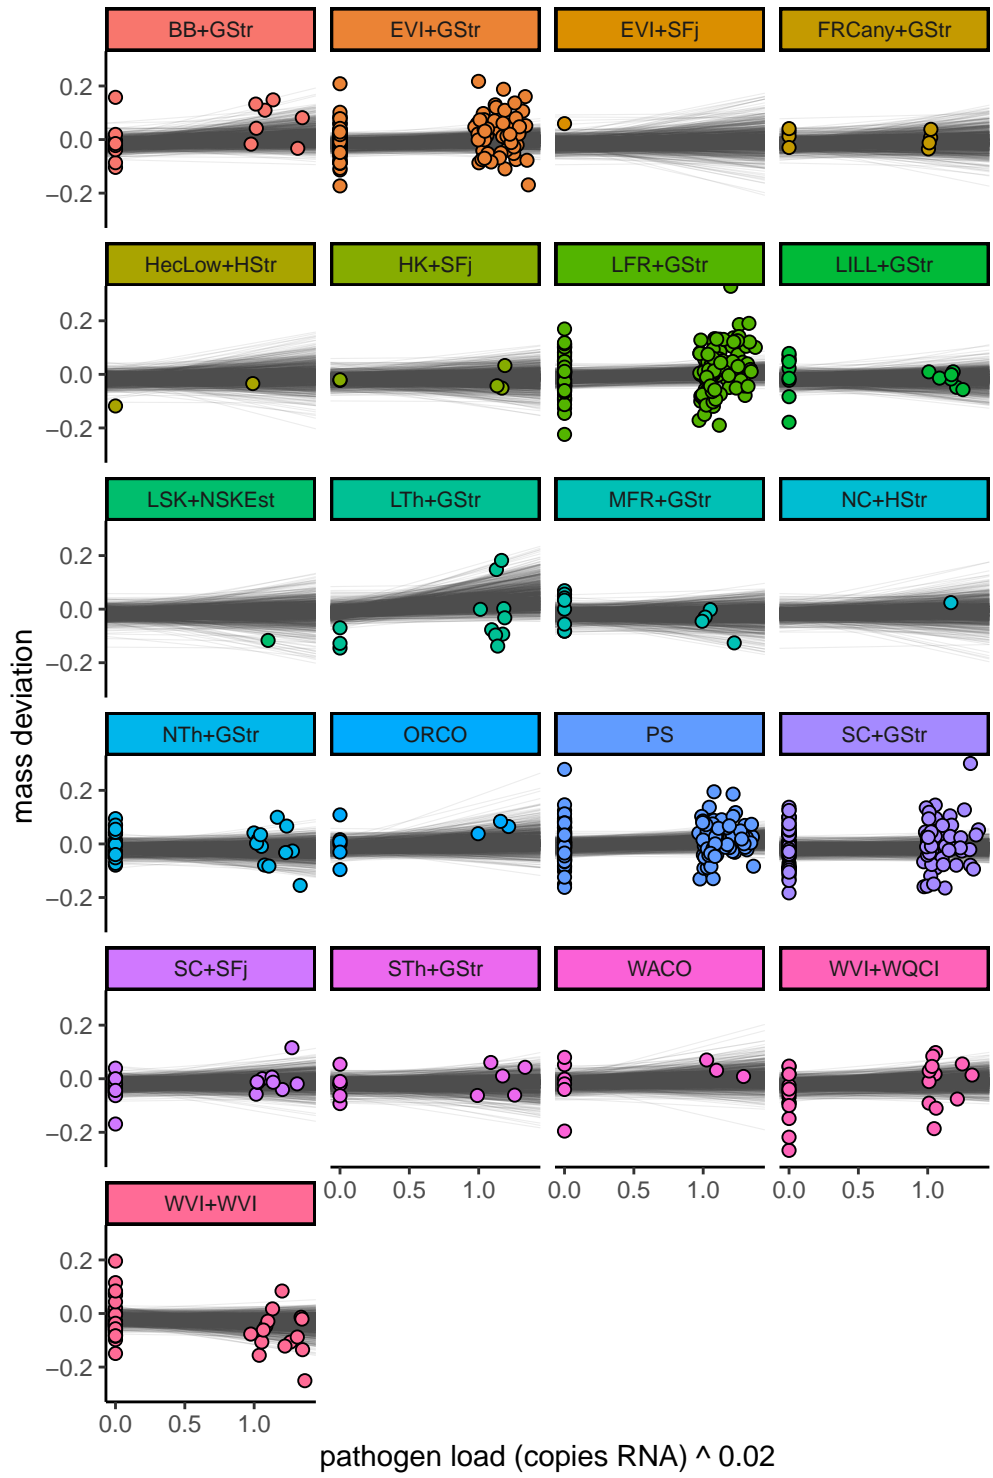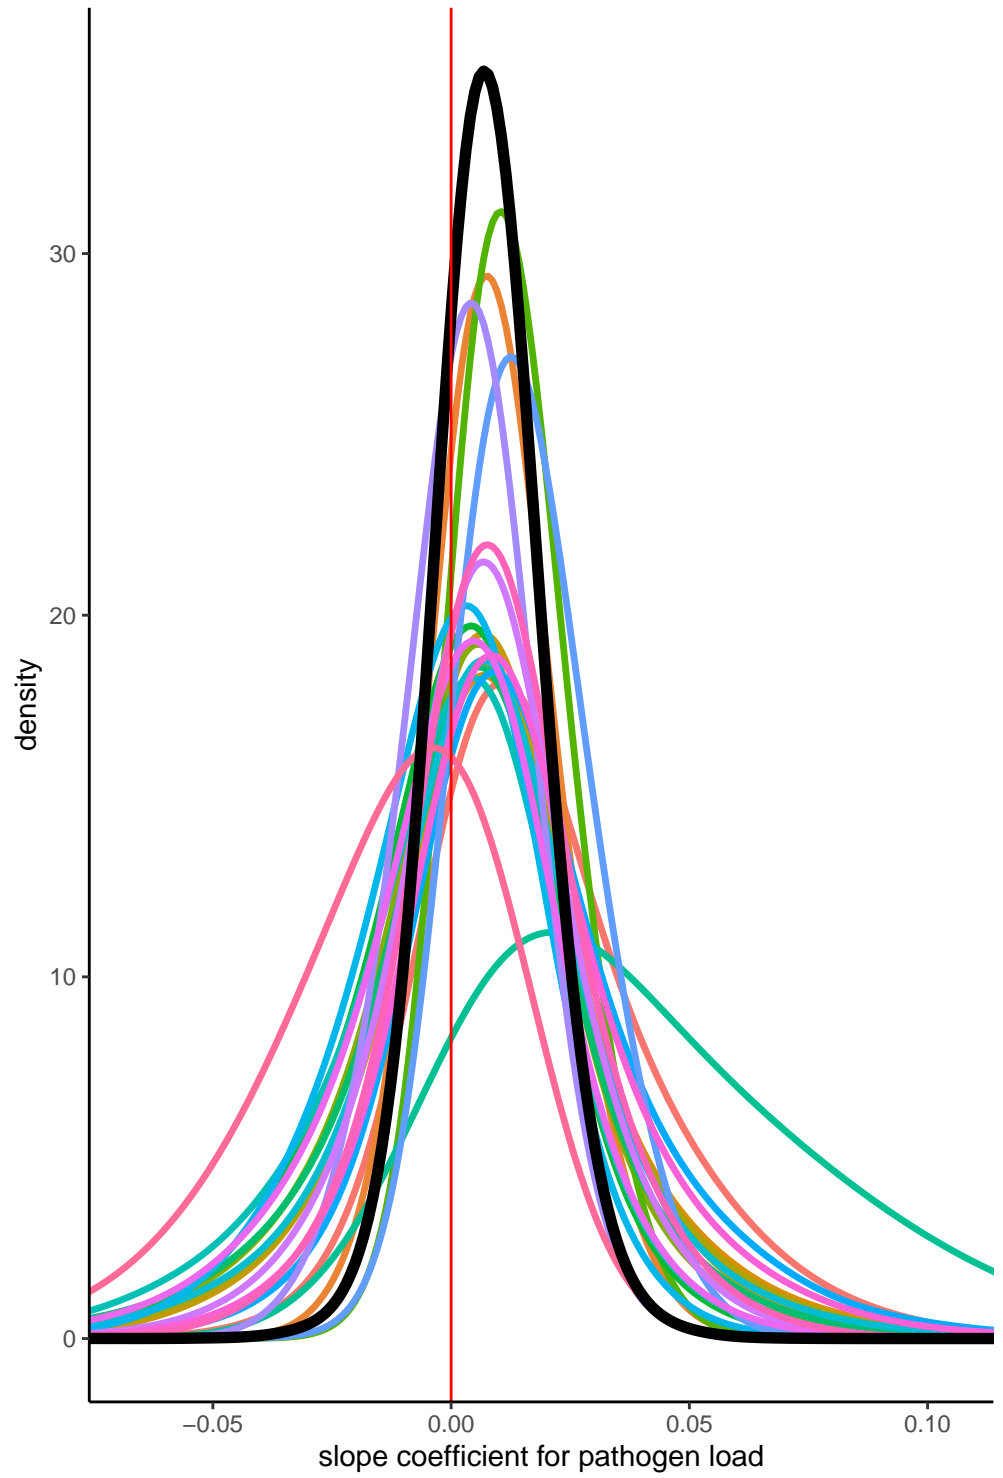

Myxobolus arcticus SpSu

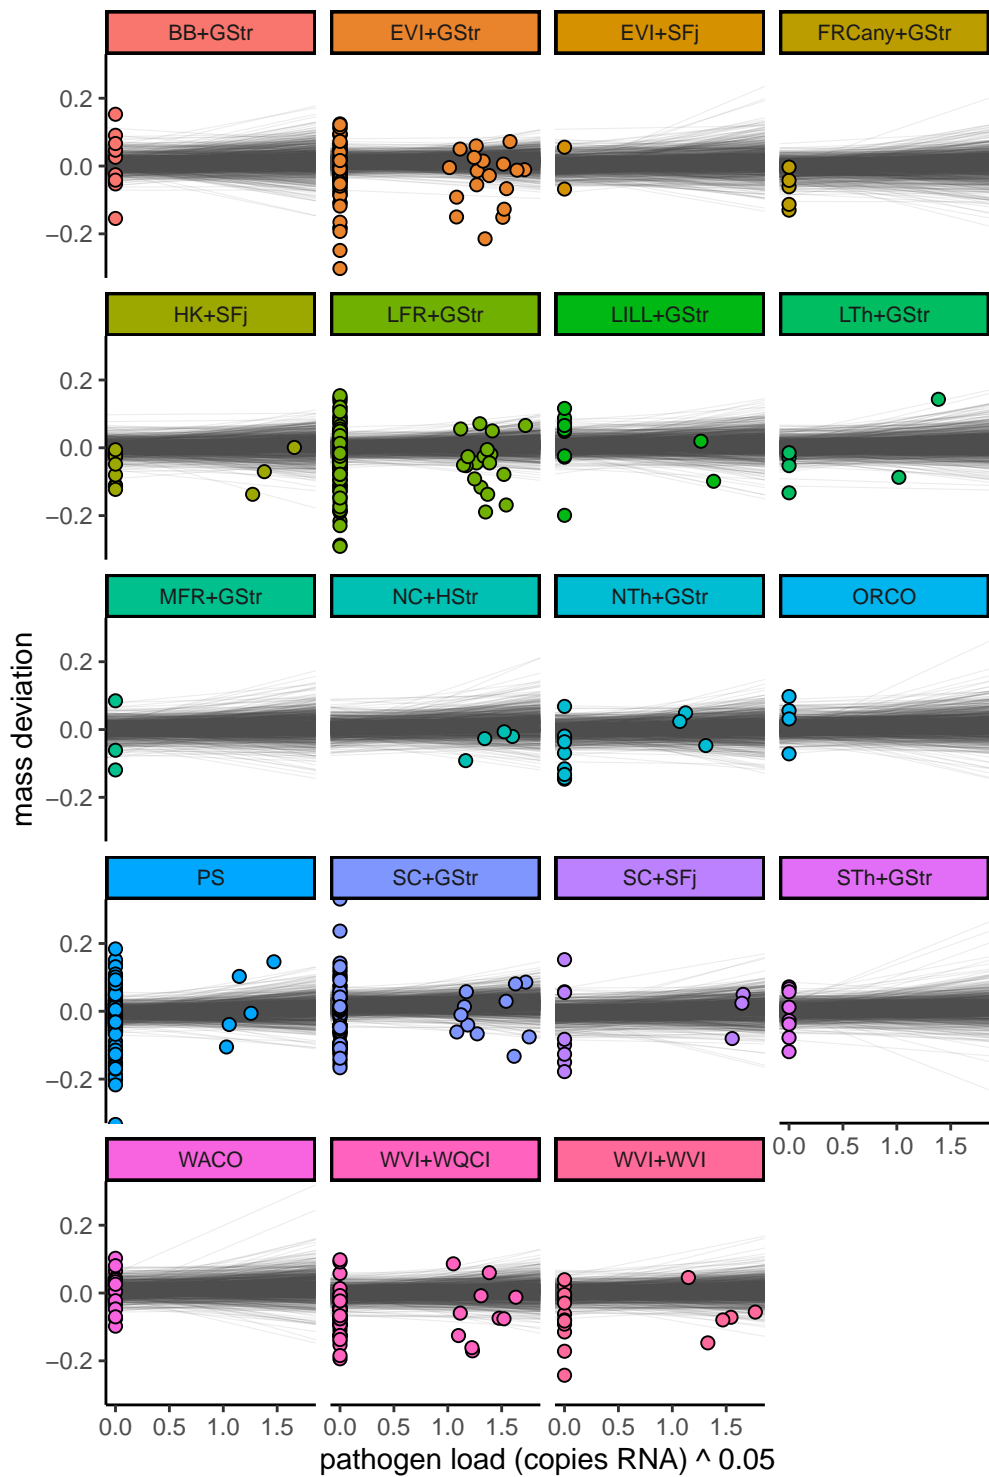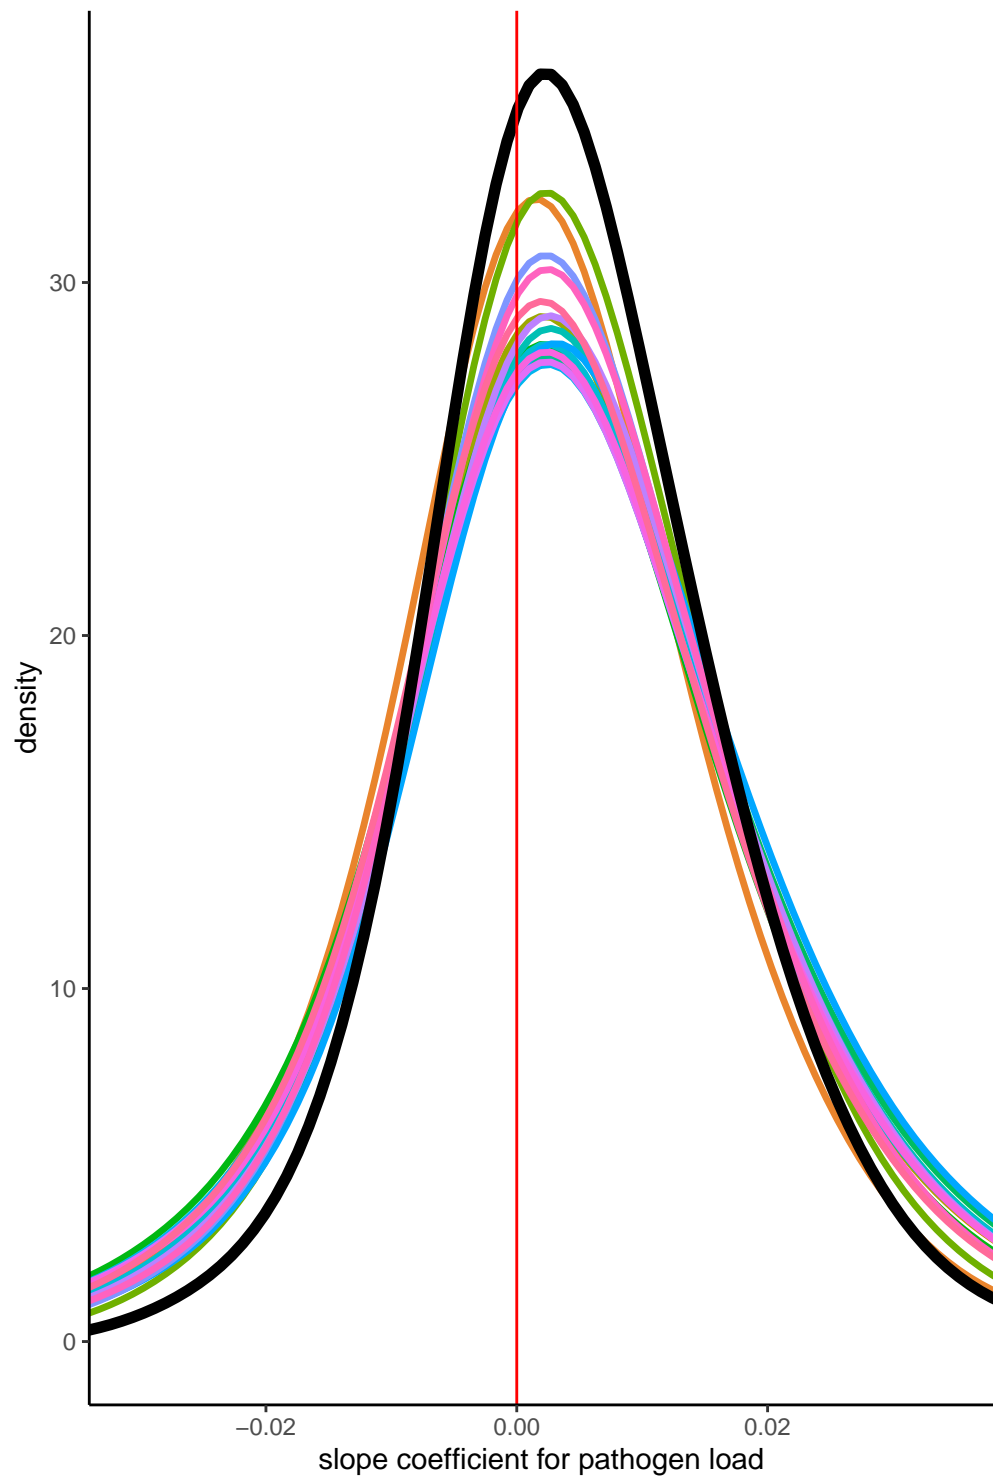

Myxobolus arcticus FaWi

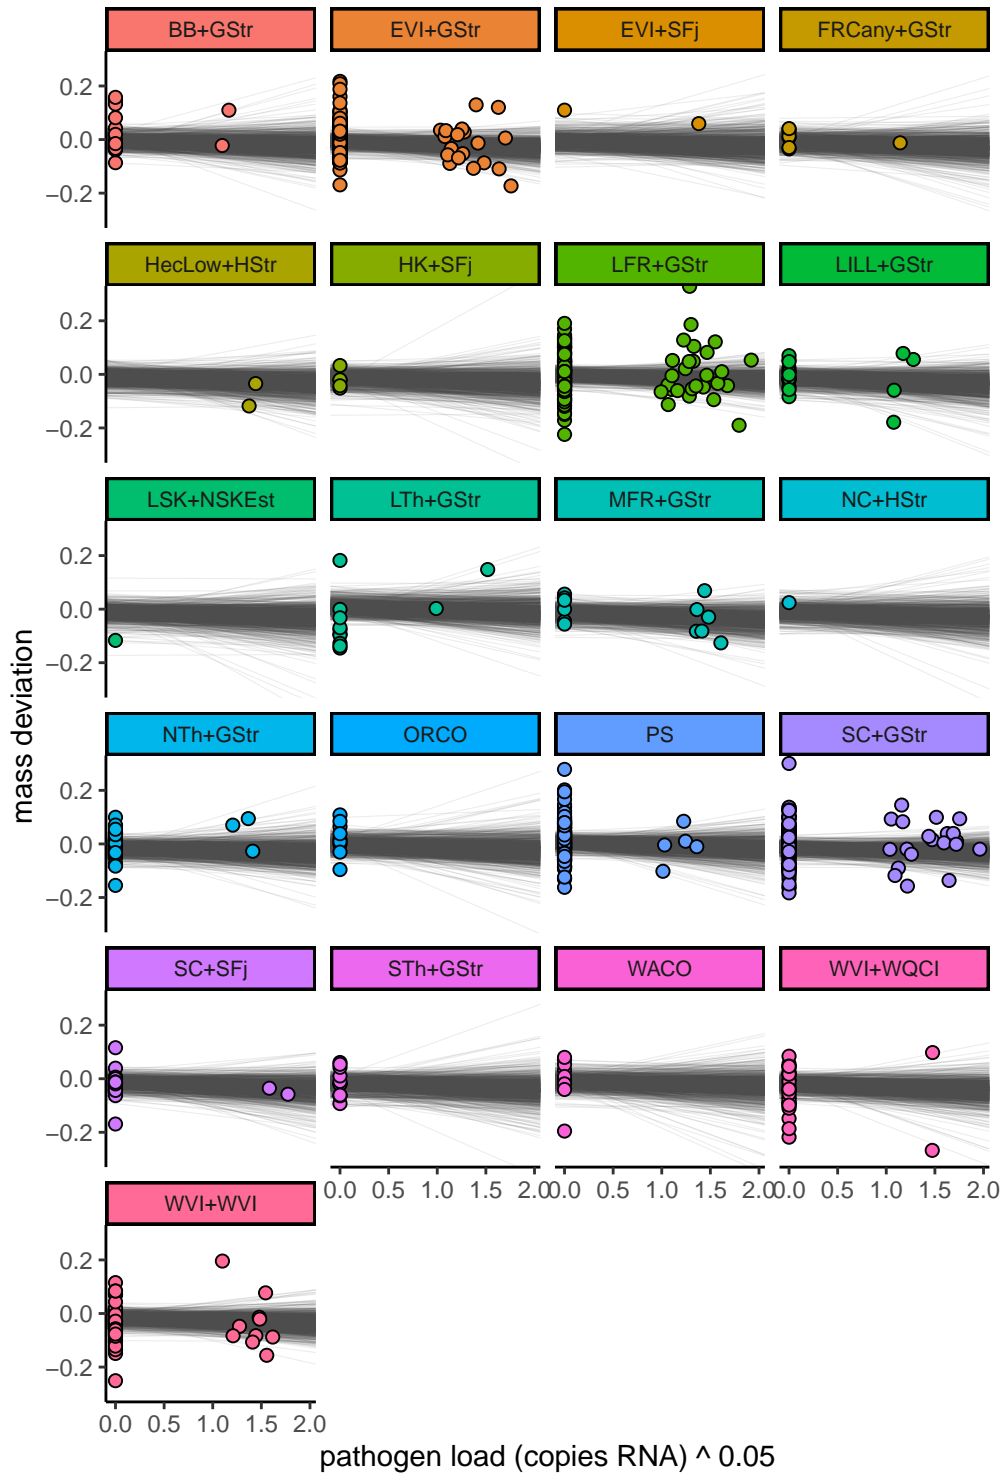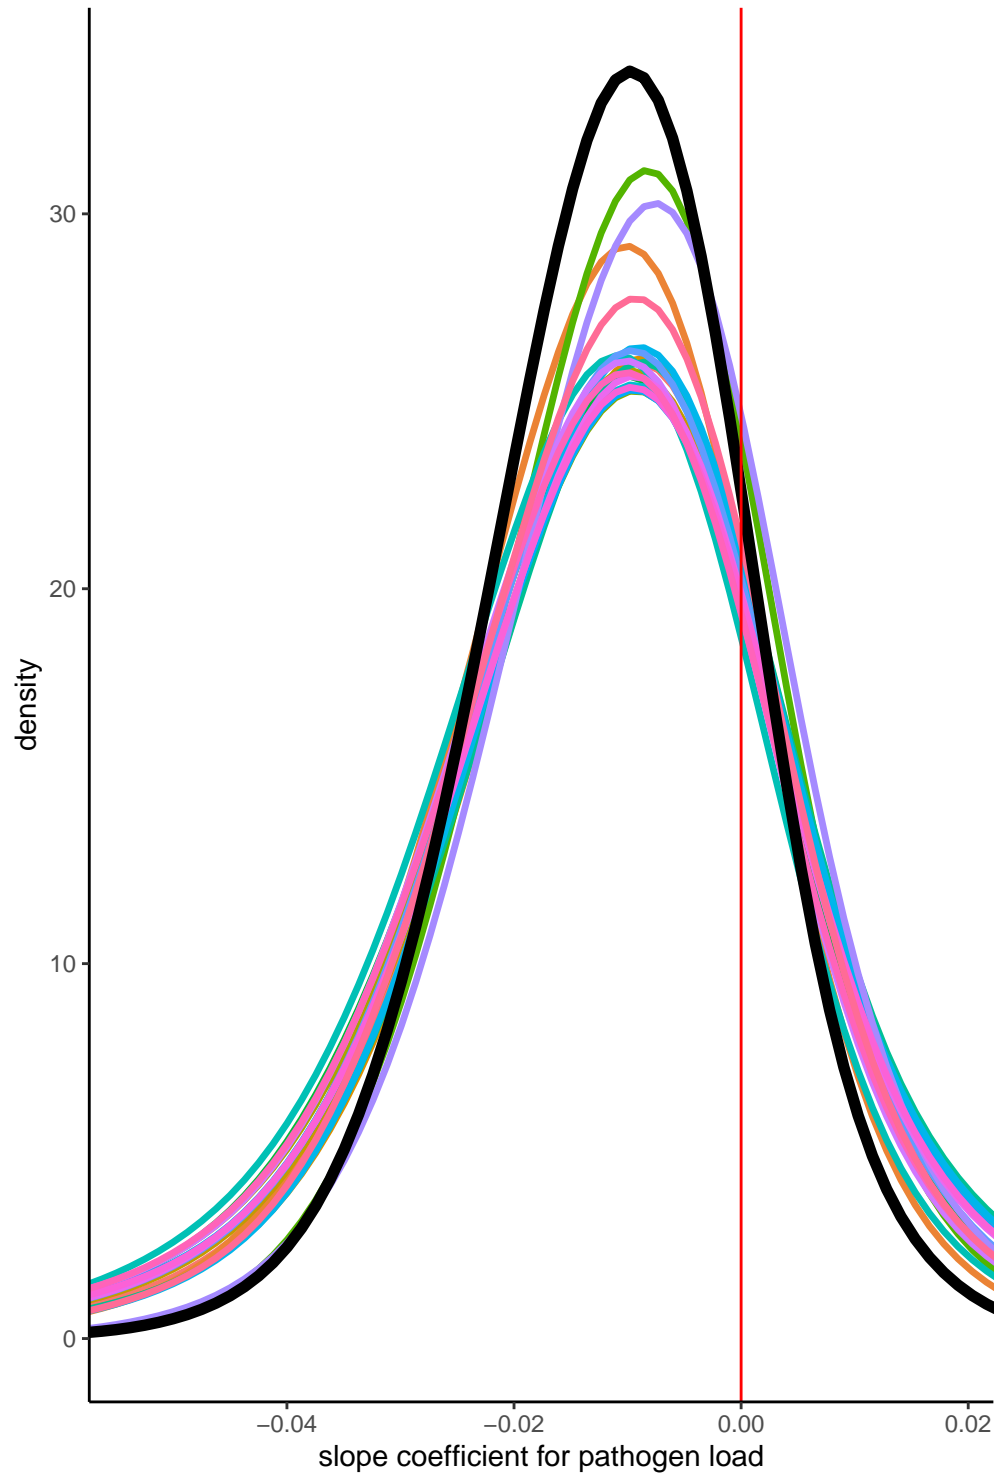

Myxobolus insidiosus SpSu

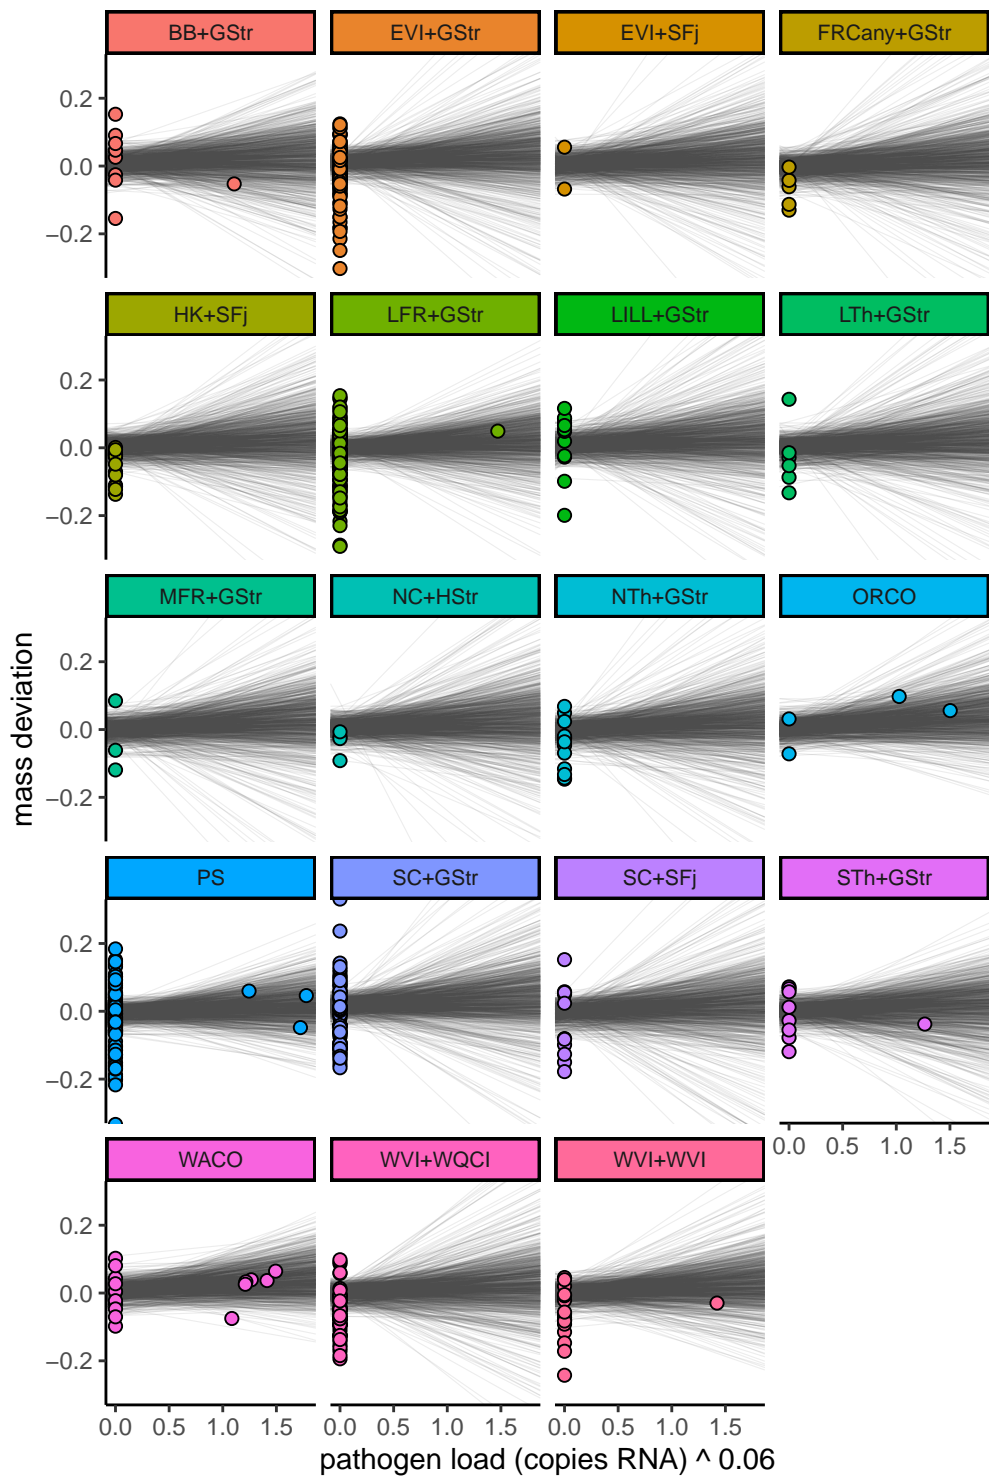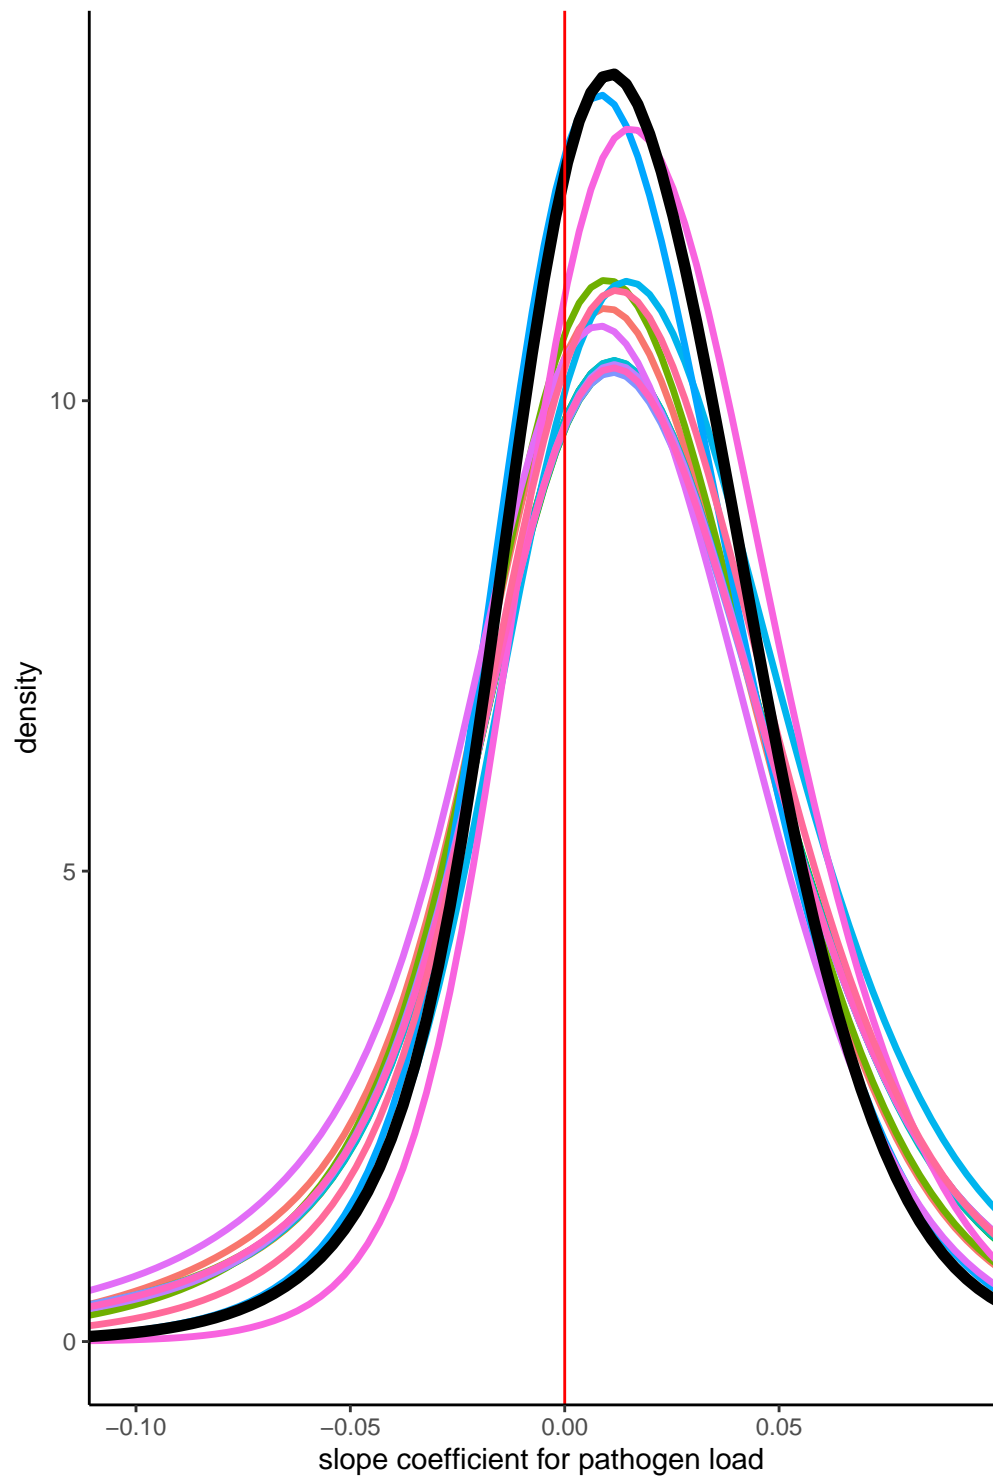

Myxobolus insidiosus FaWi

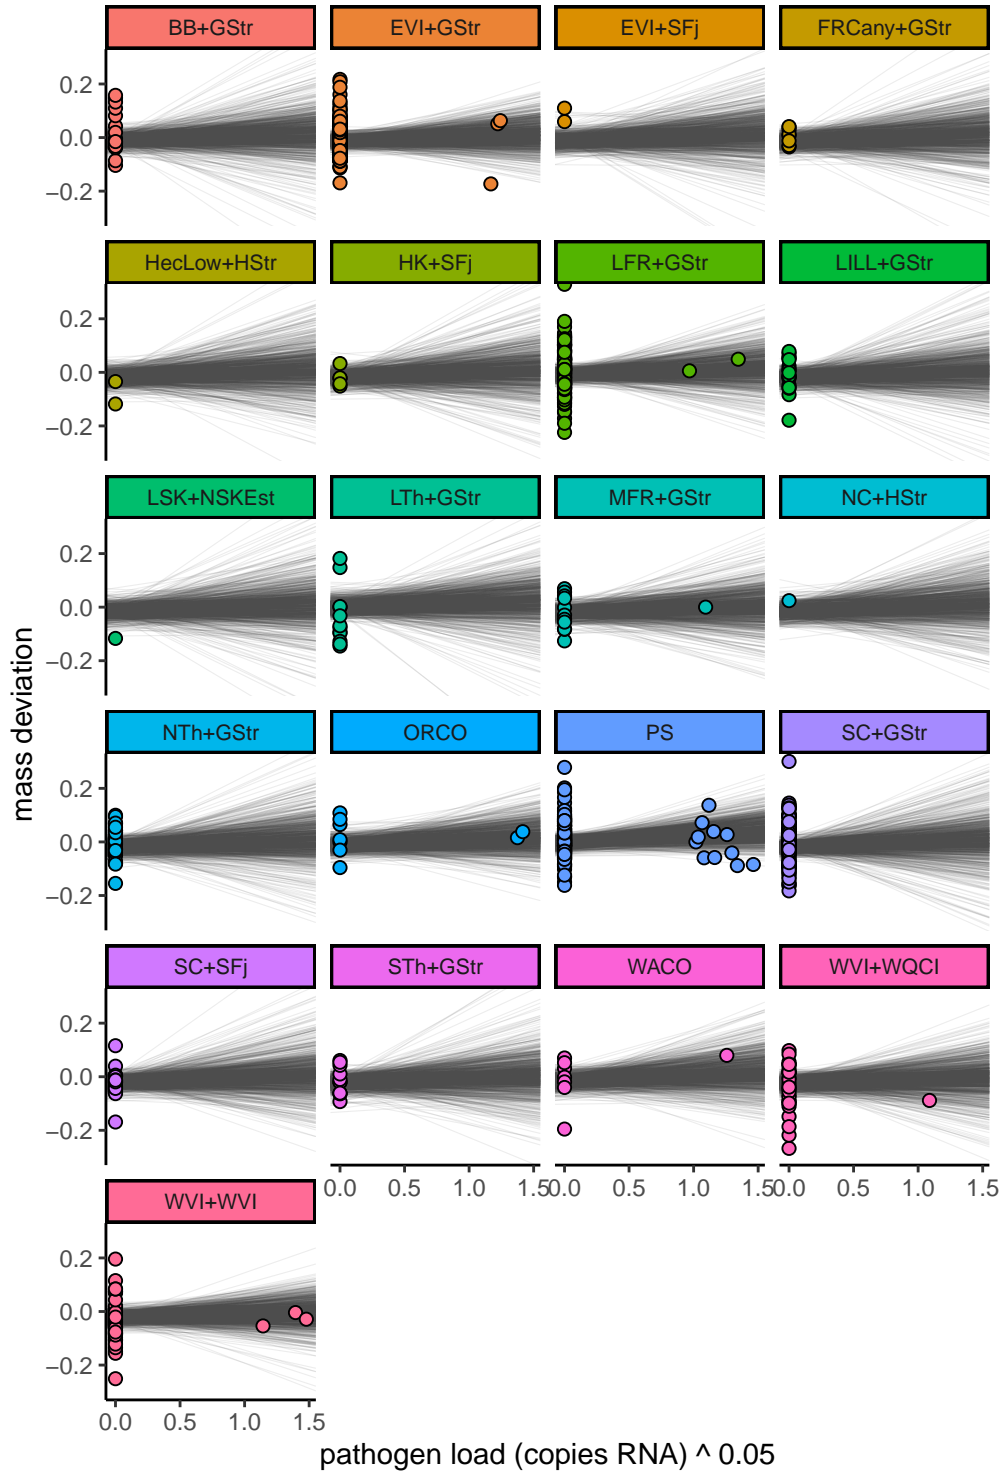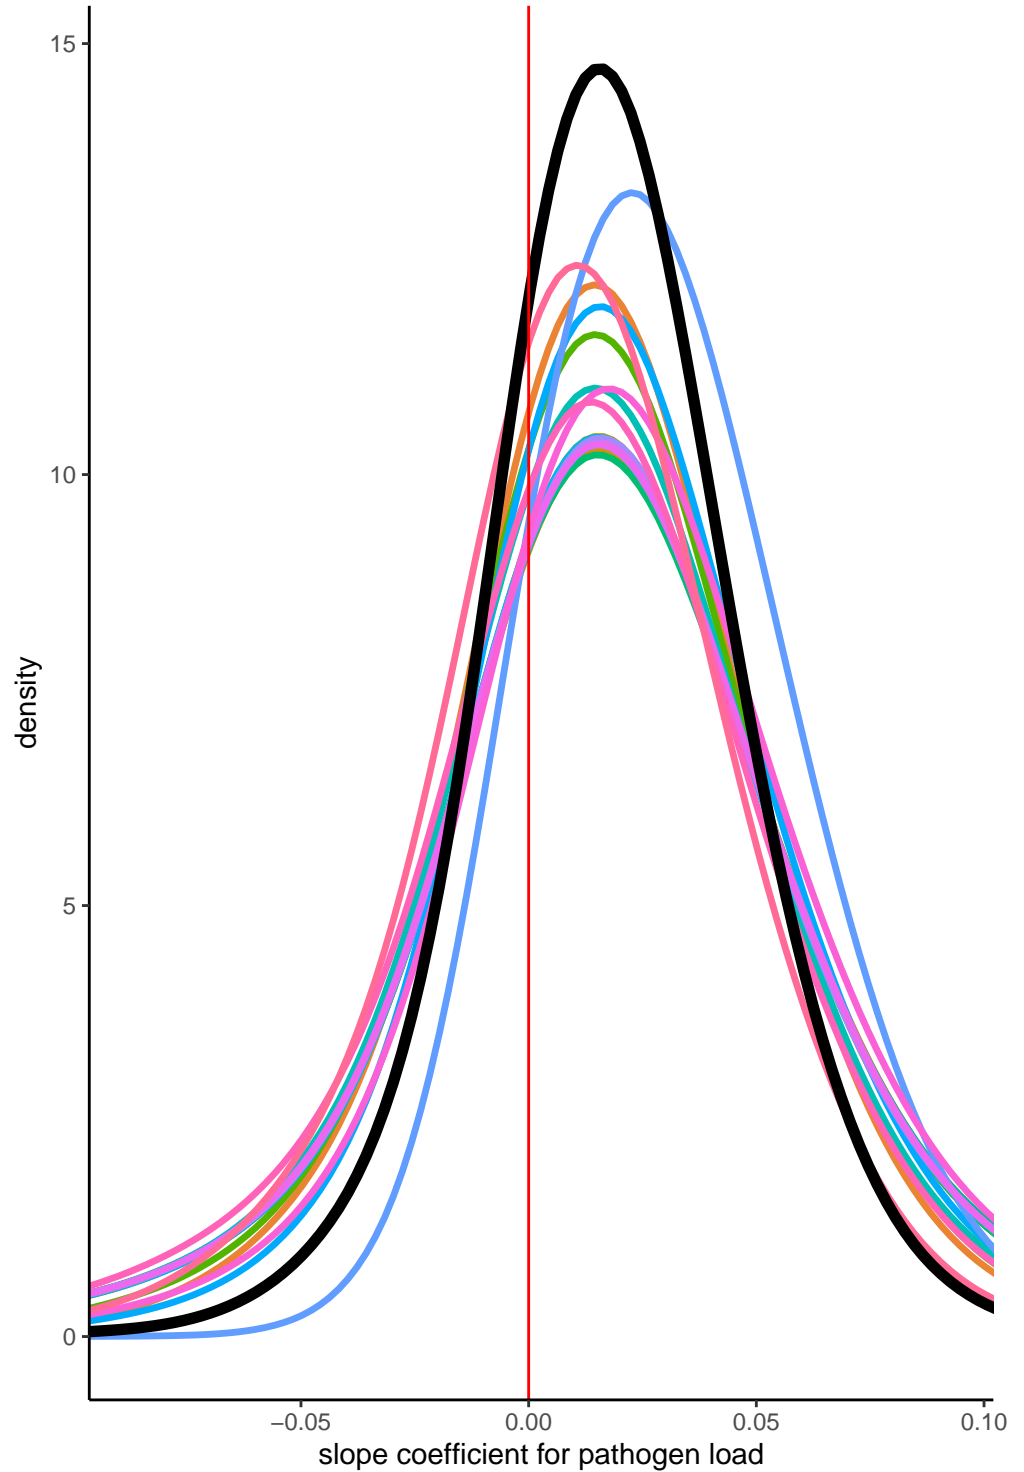

Nanophyetus salmincola SpSu

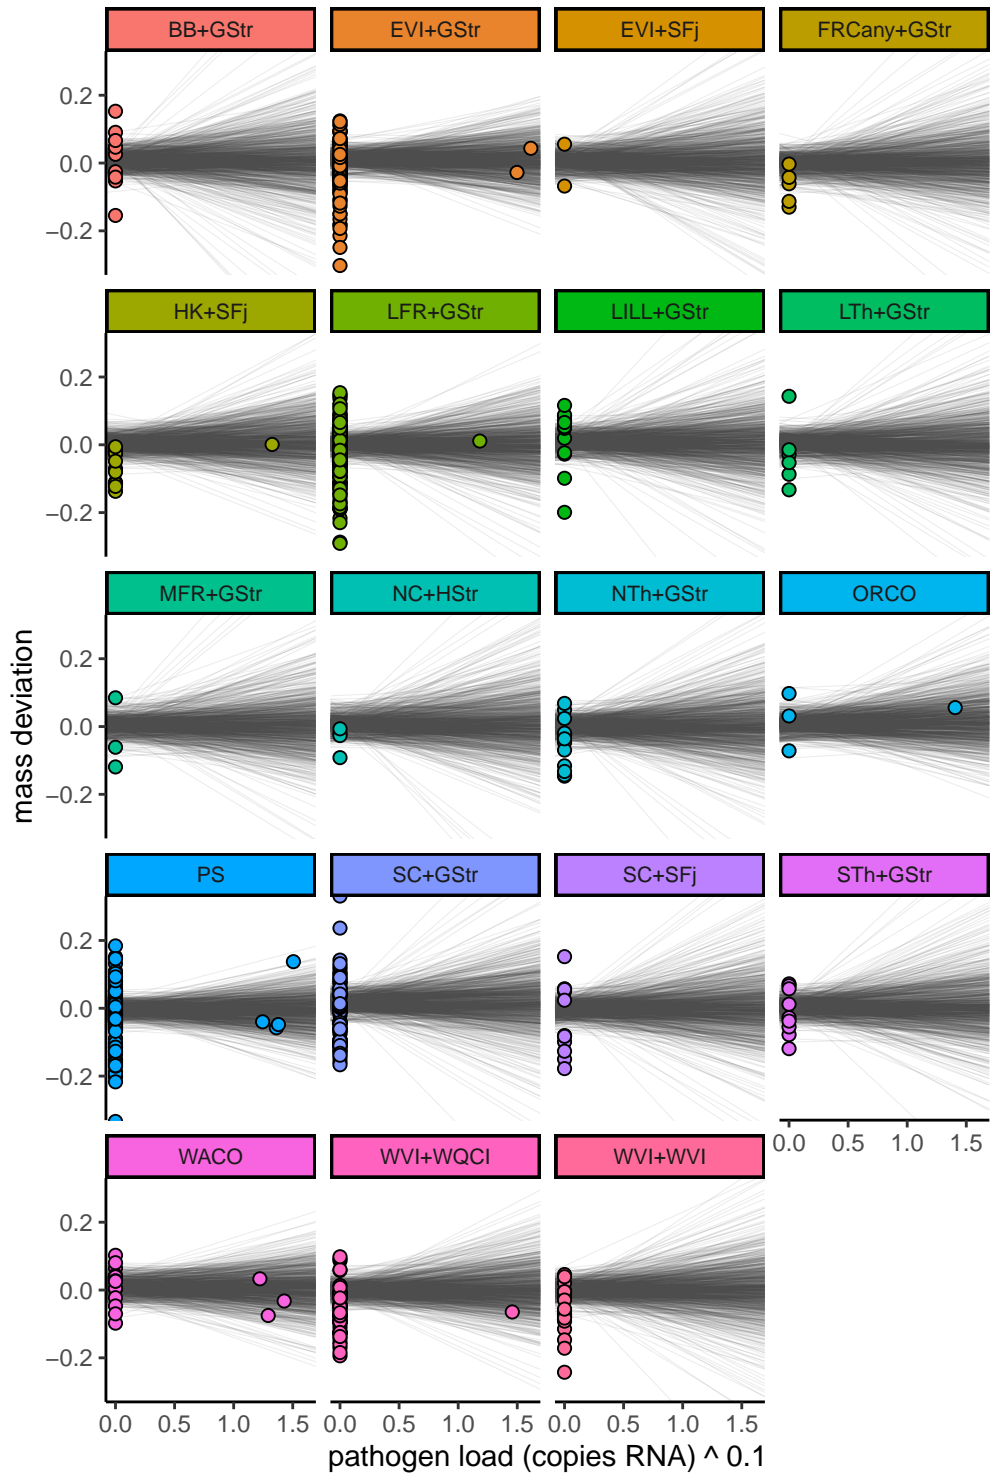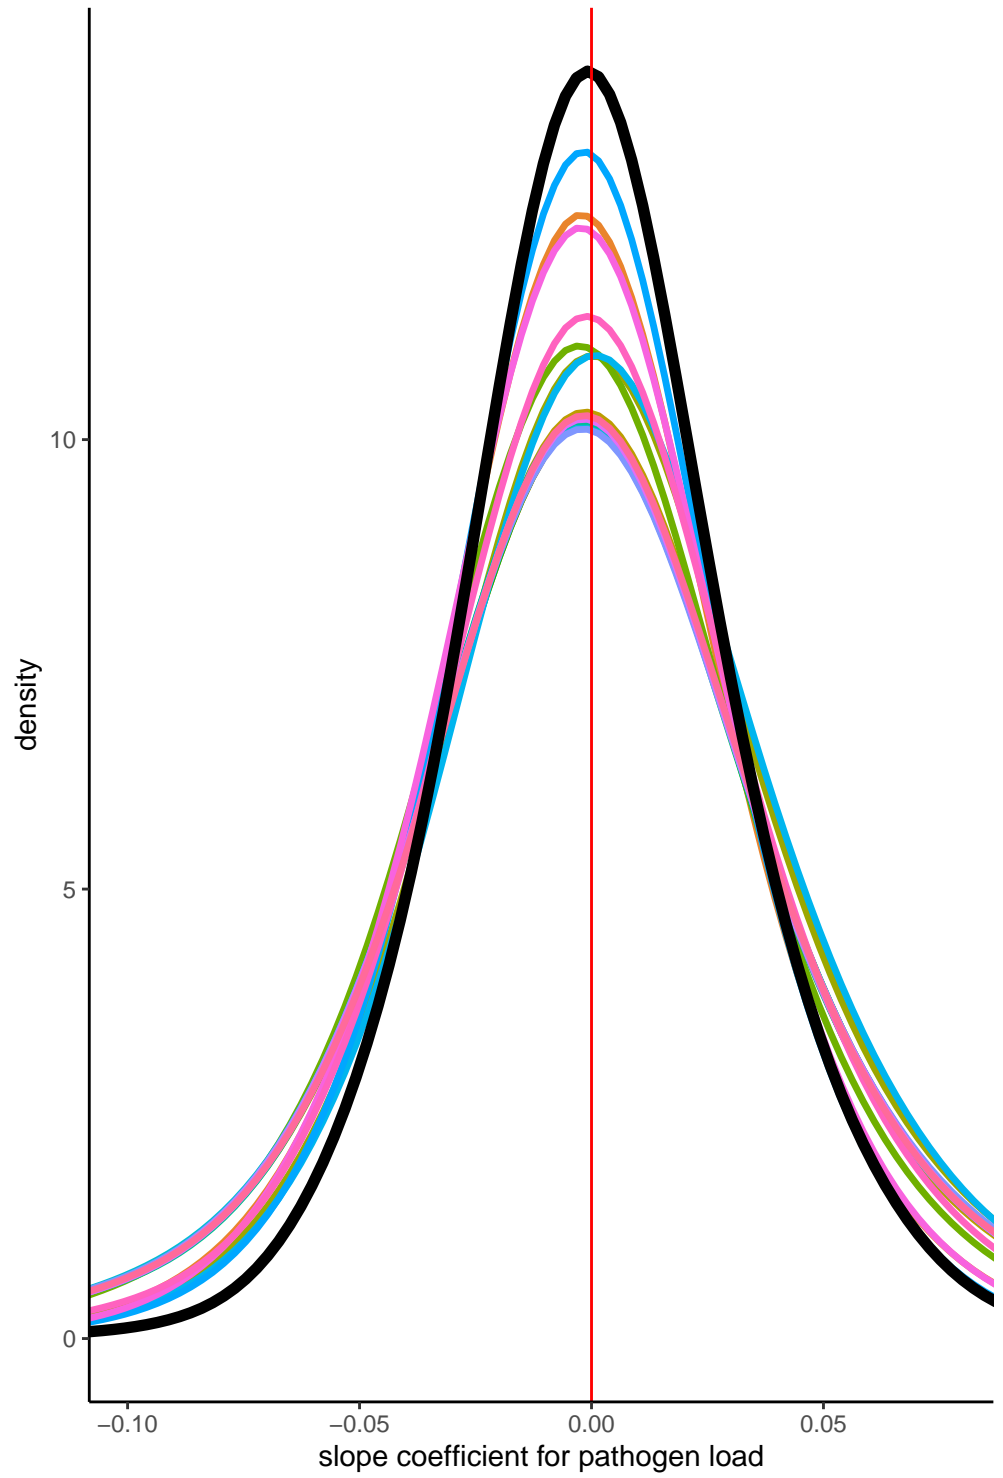

Nanophyetus salmincola FaWi

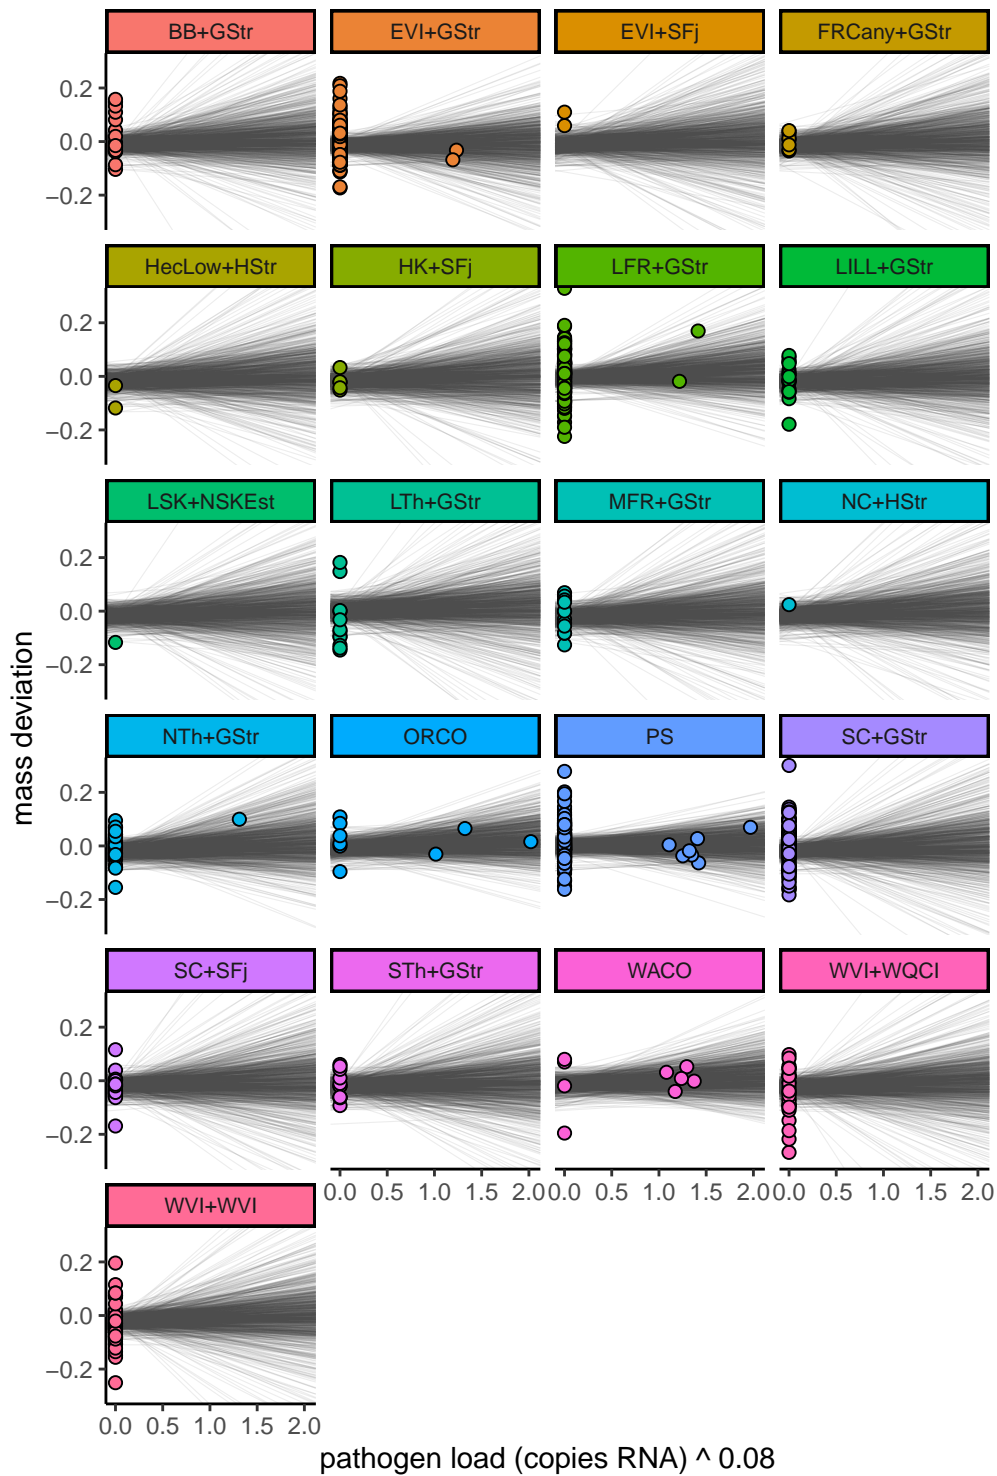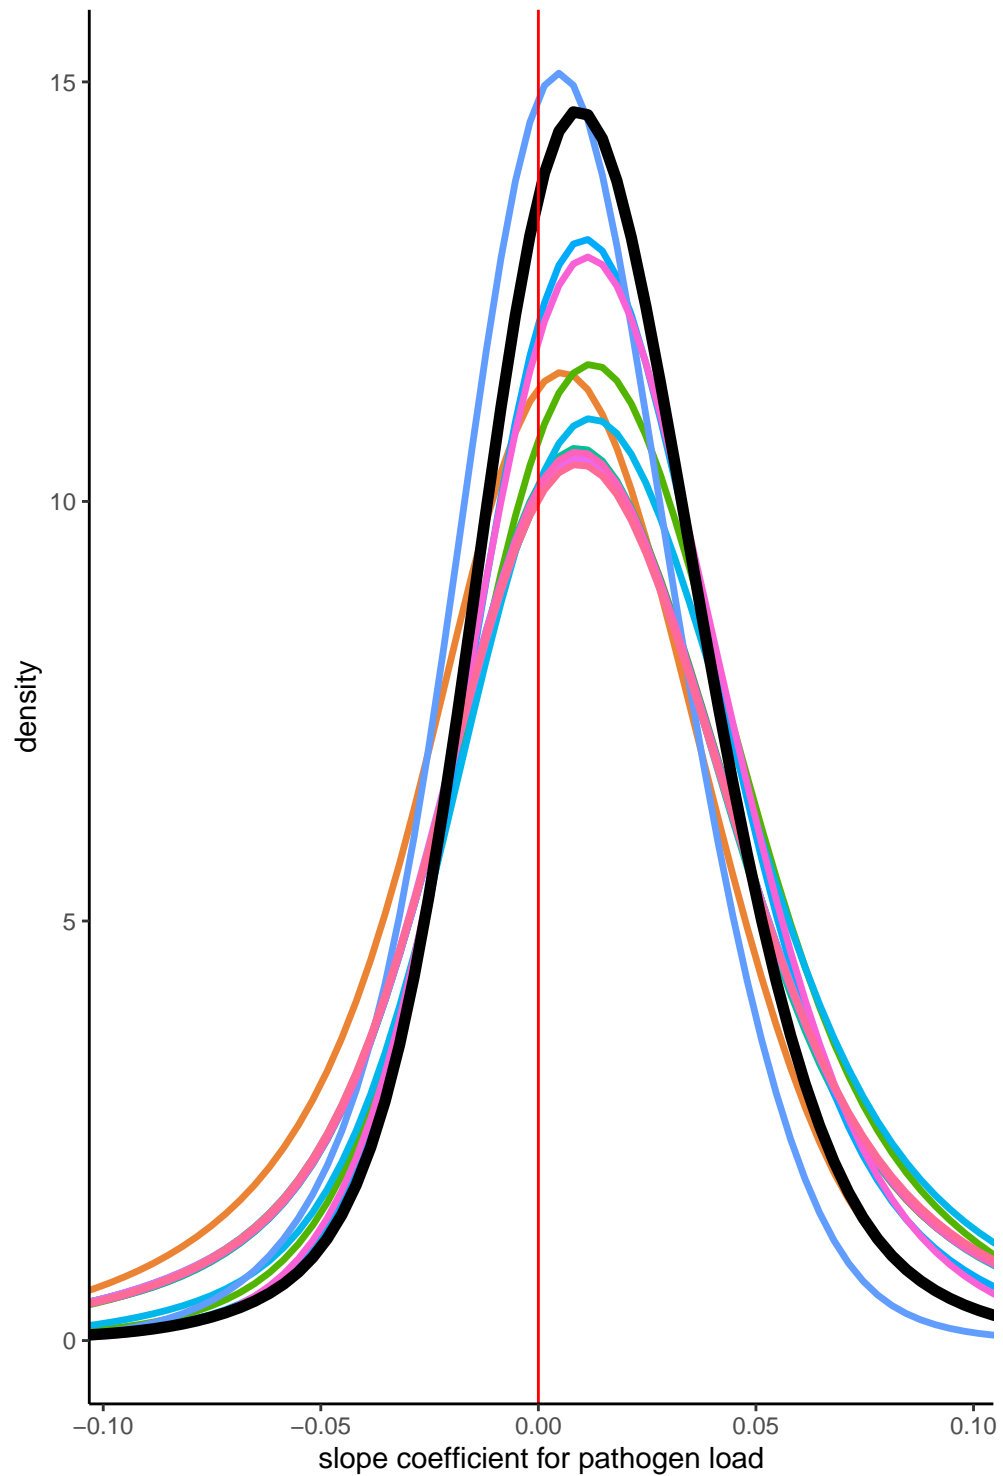



Parvicapsula kabatai SpSu

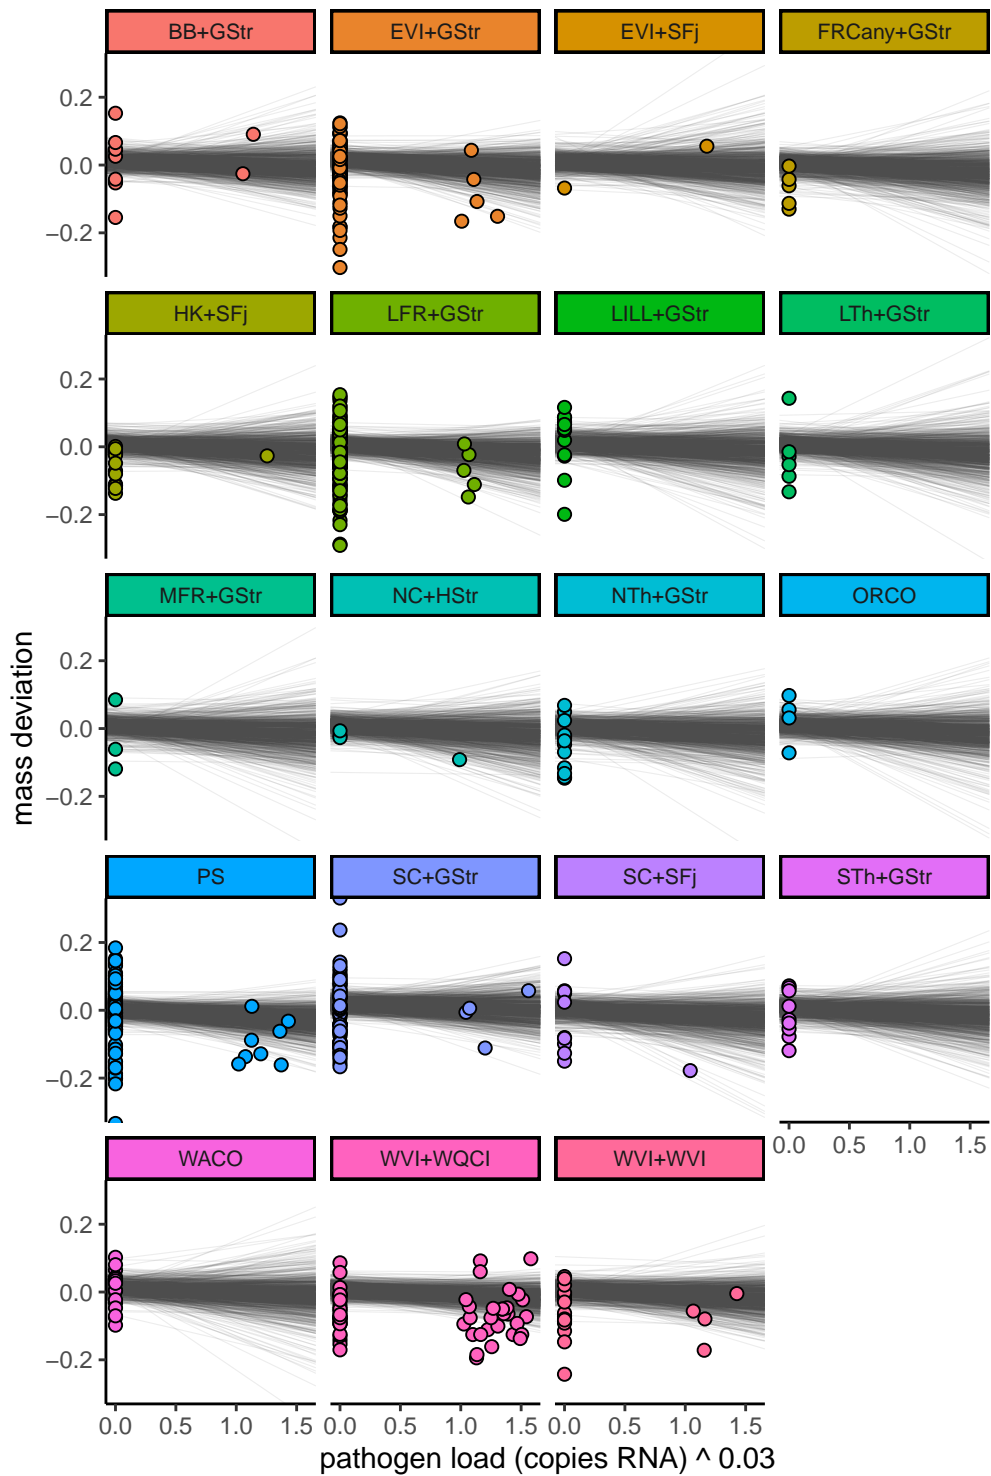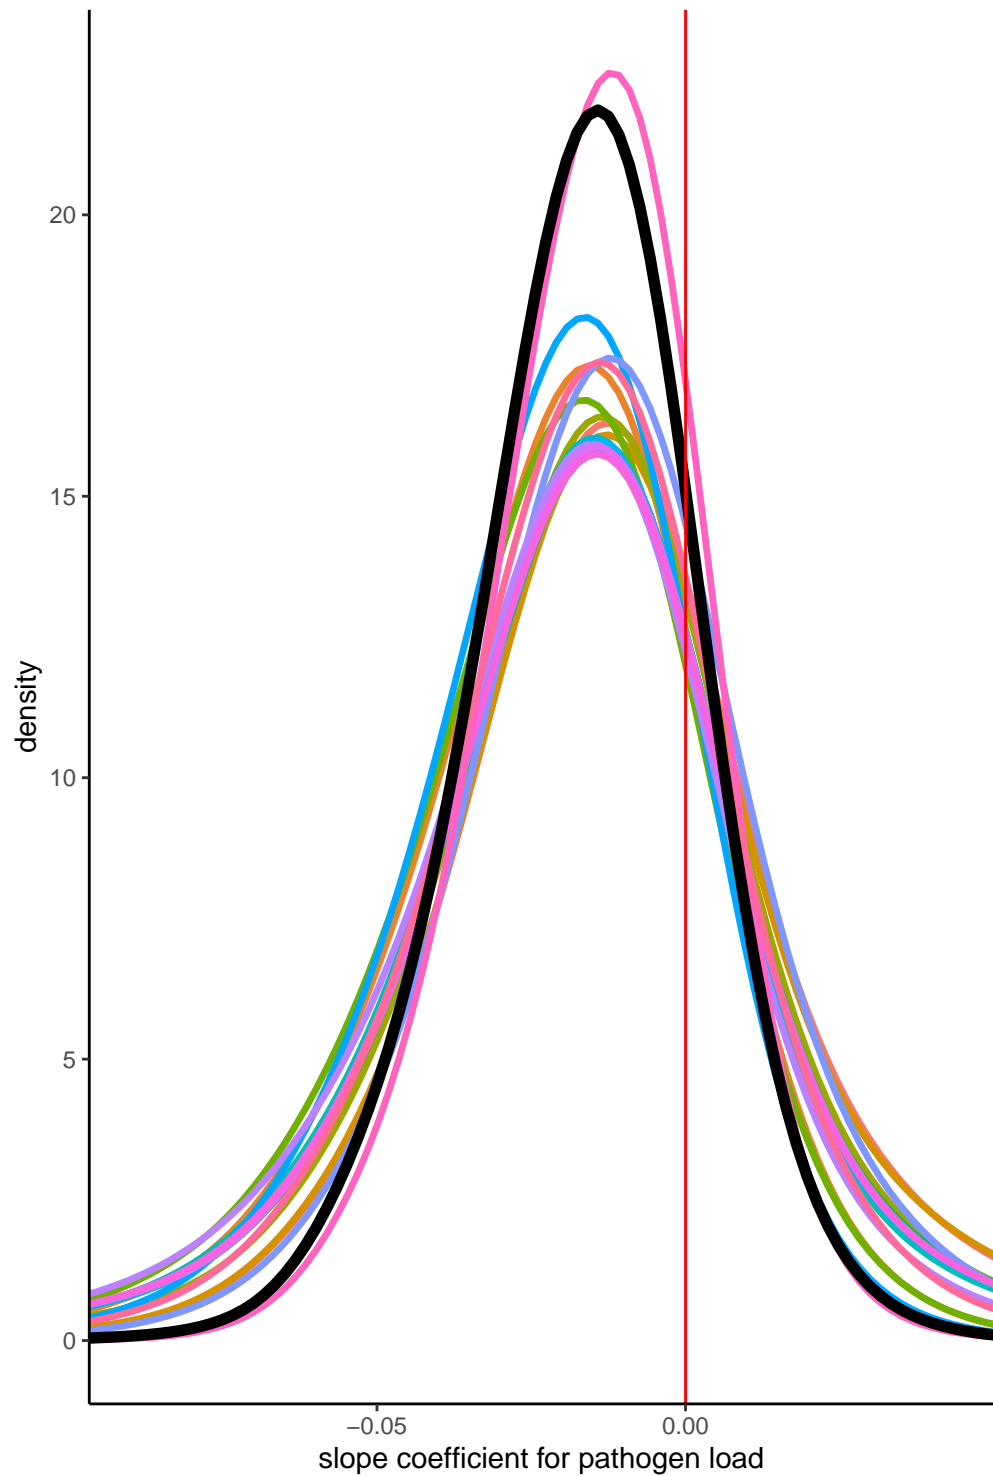

Parvicapsula kabatai FaWi

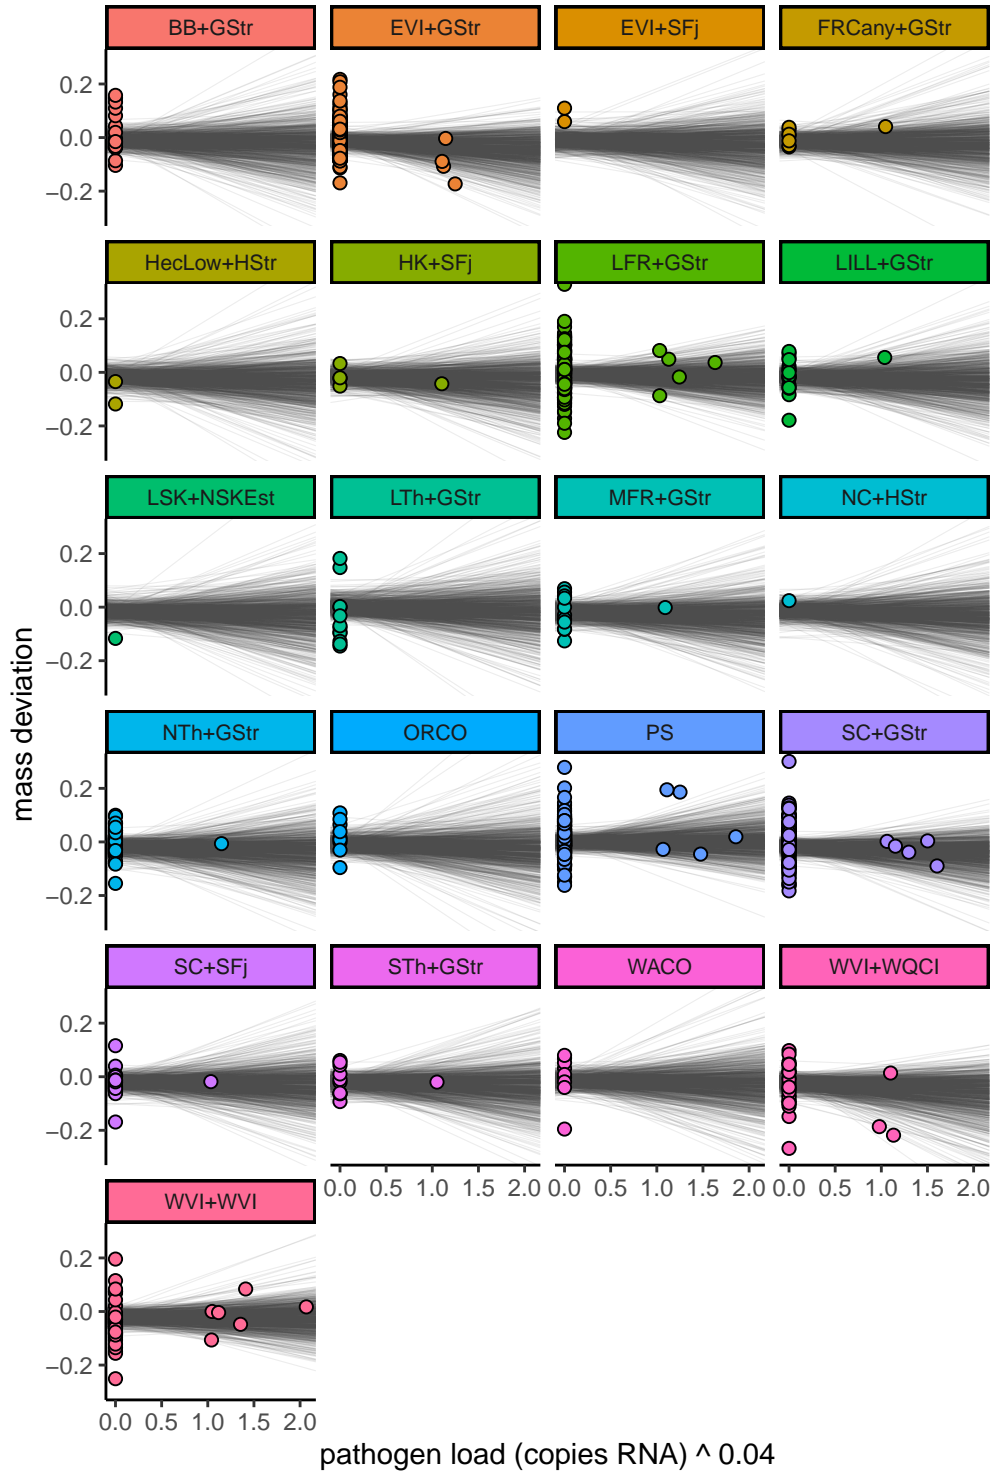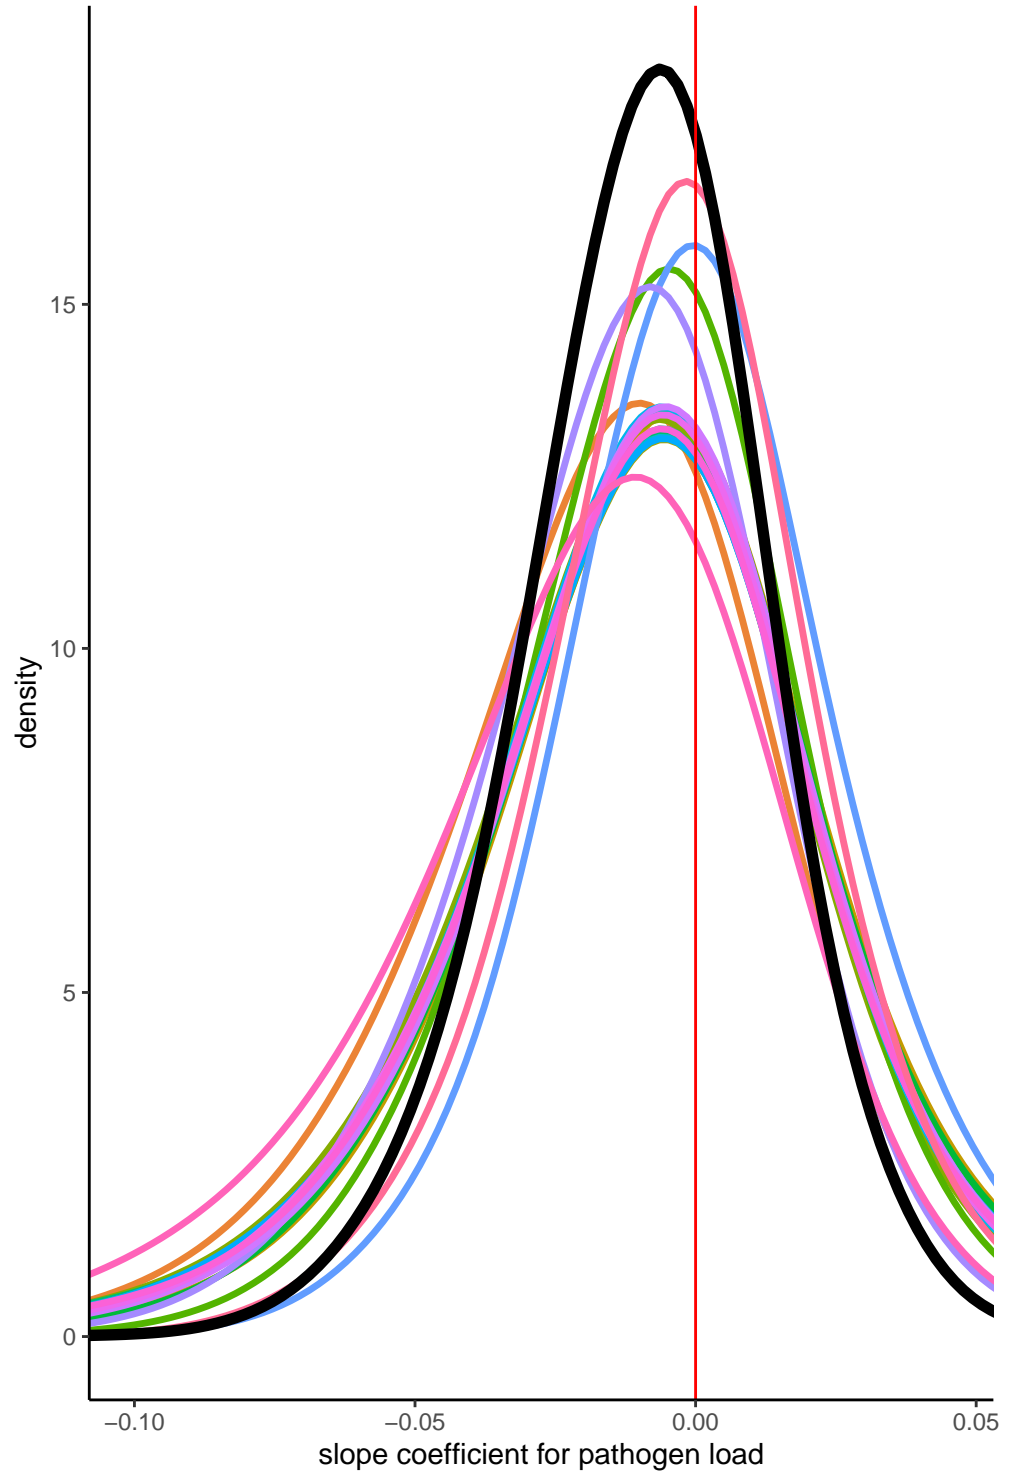

Parvicapsula minibicornis SpSu

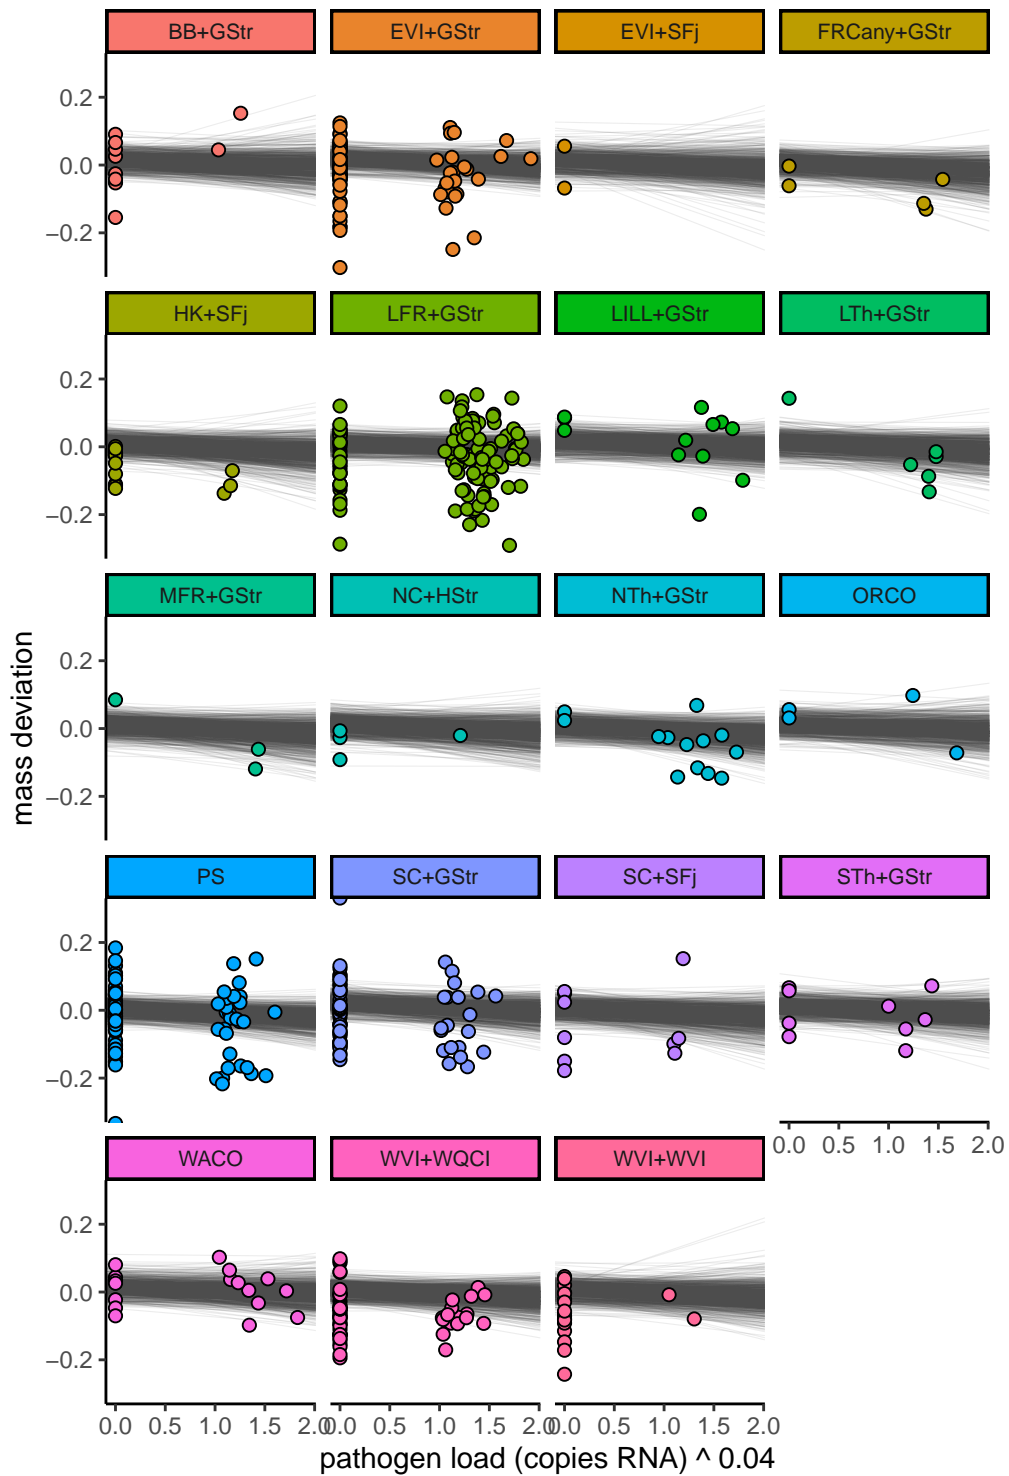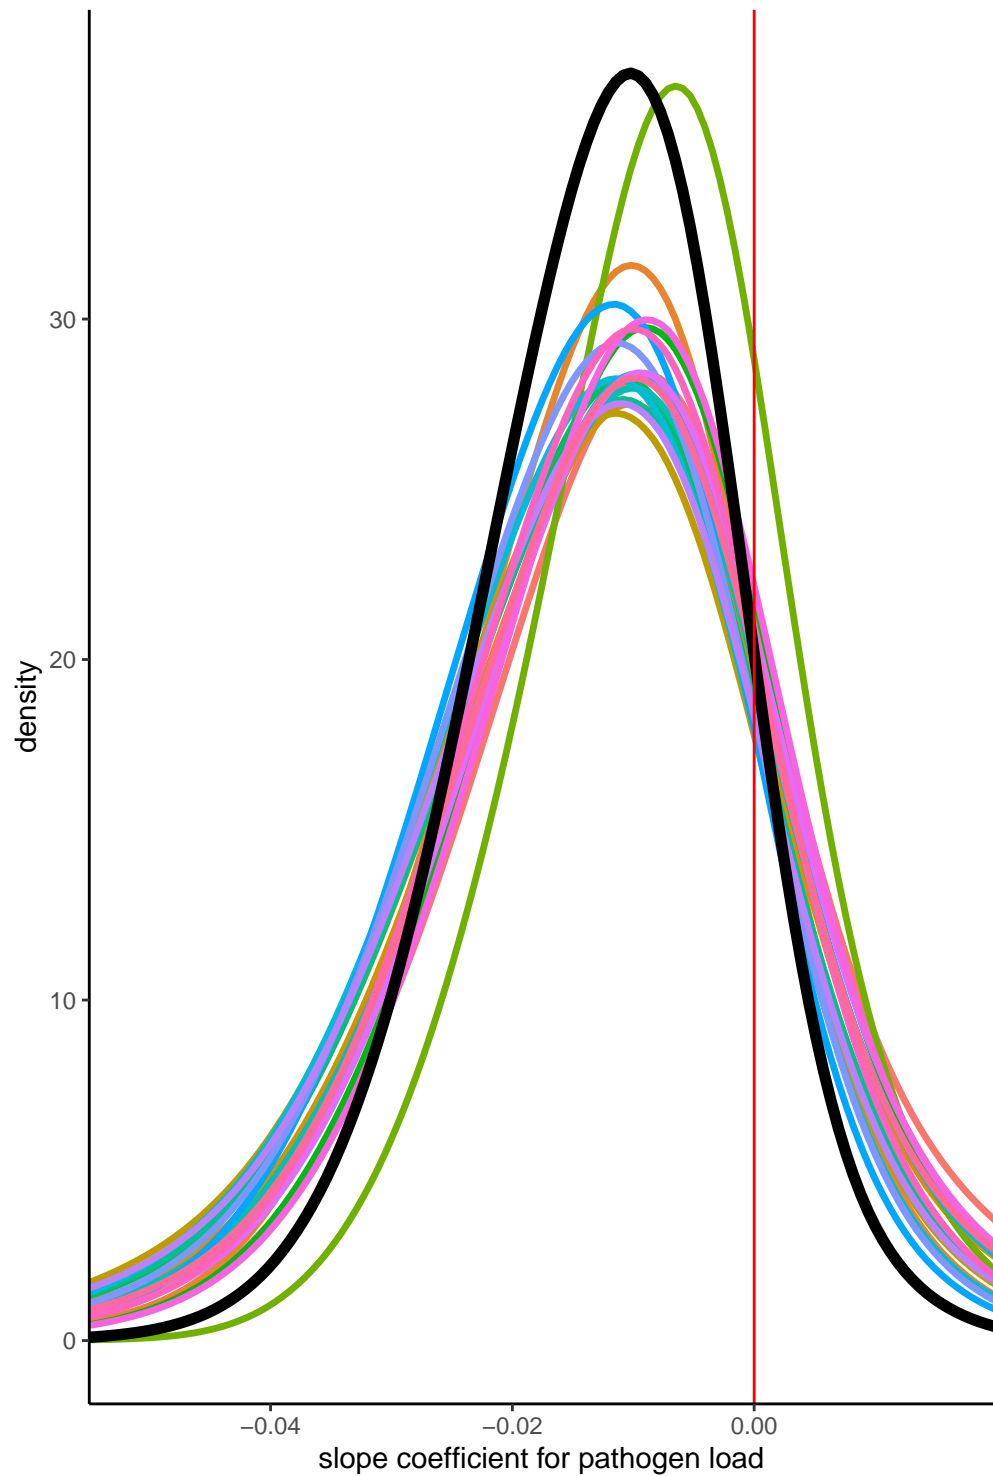

Parvicapsula minibicornis FaWi

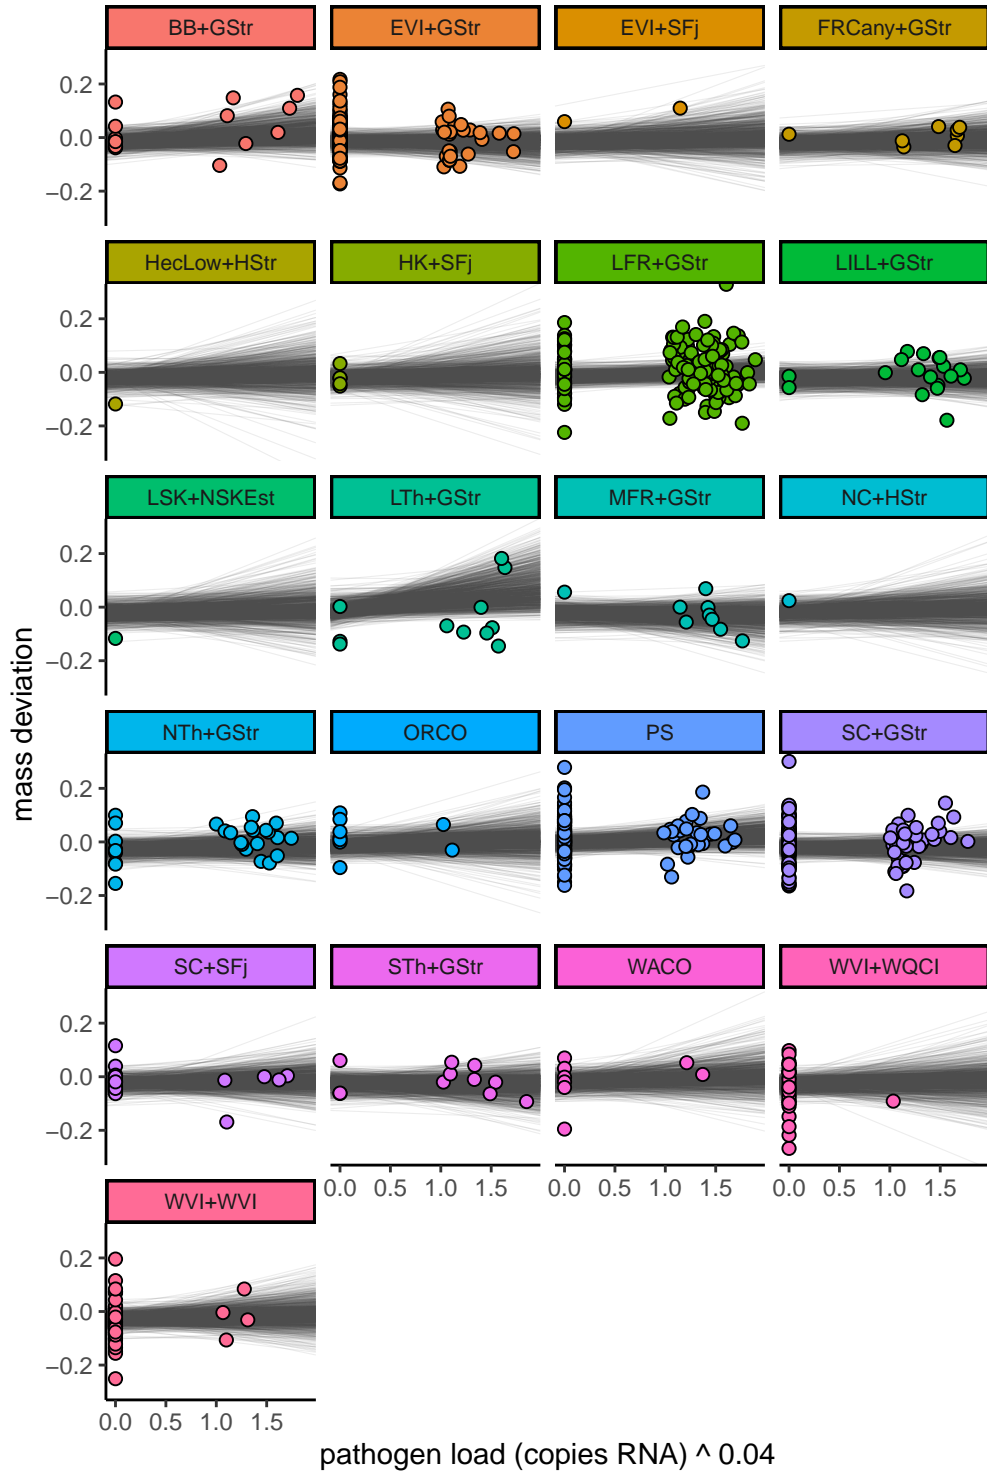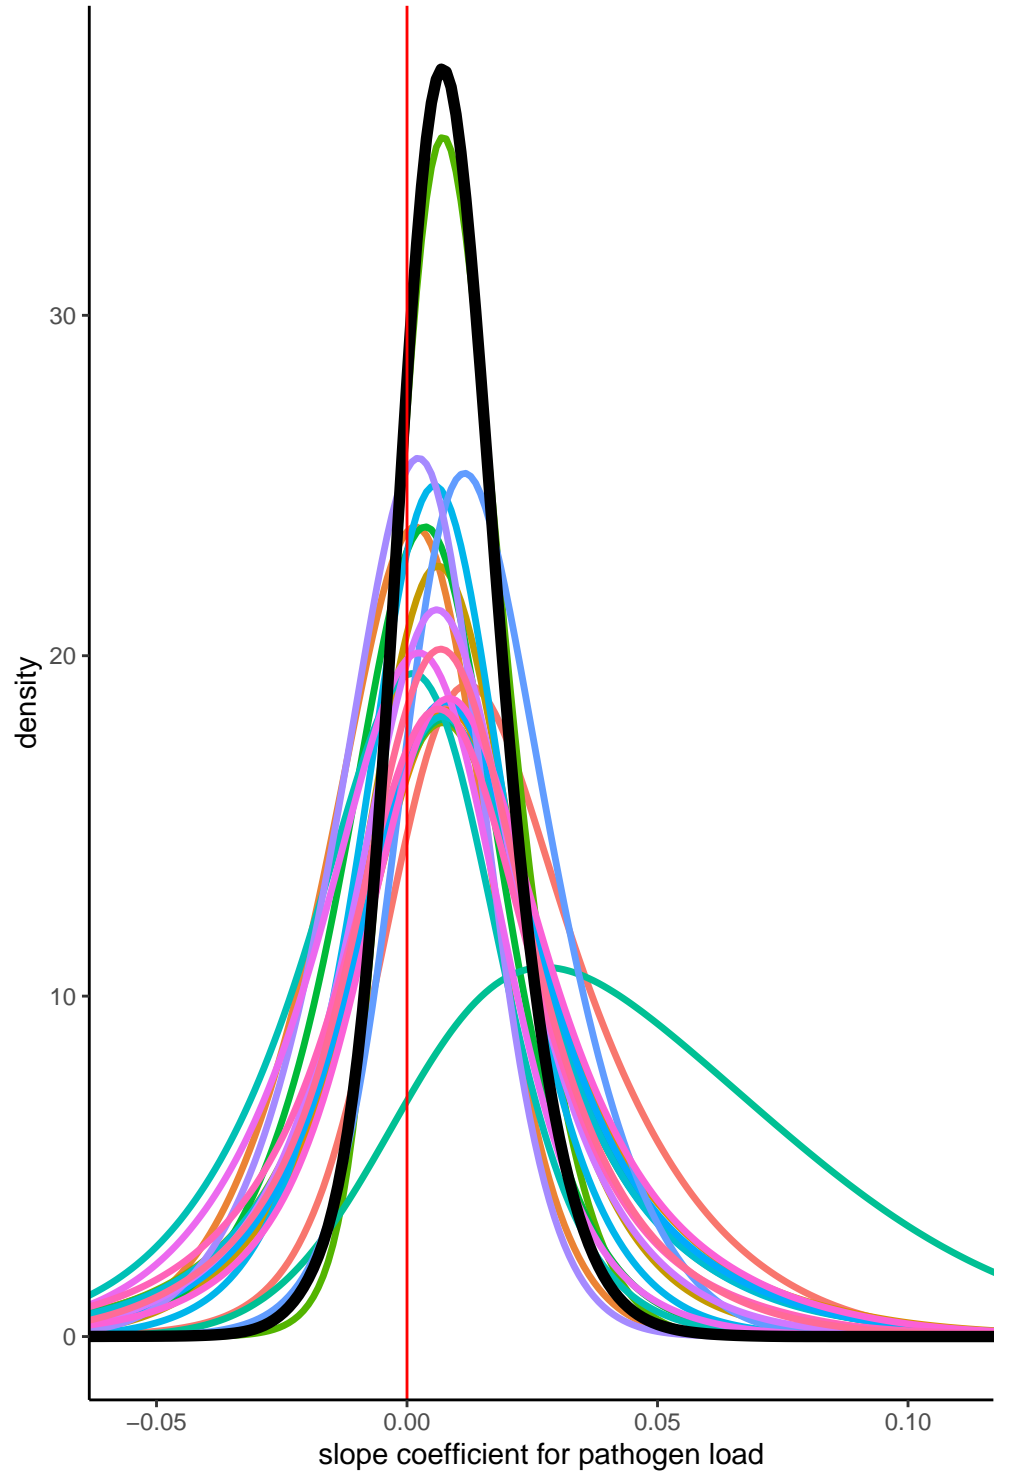

Parvicapsula pseudobranchicola SpSu

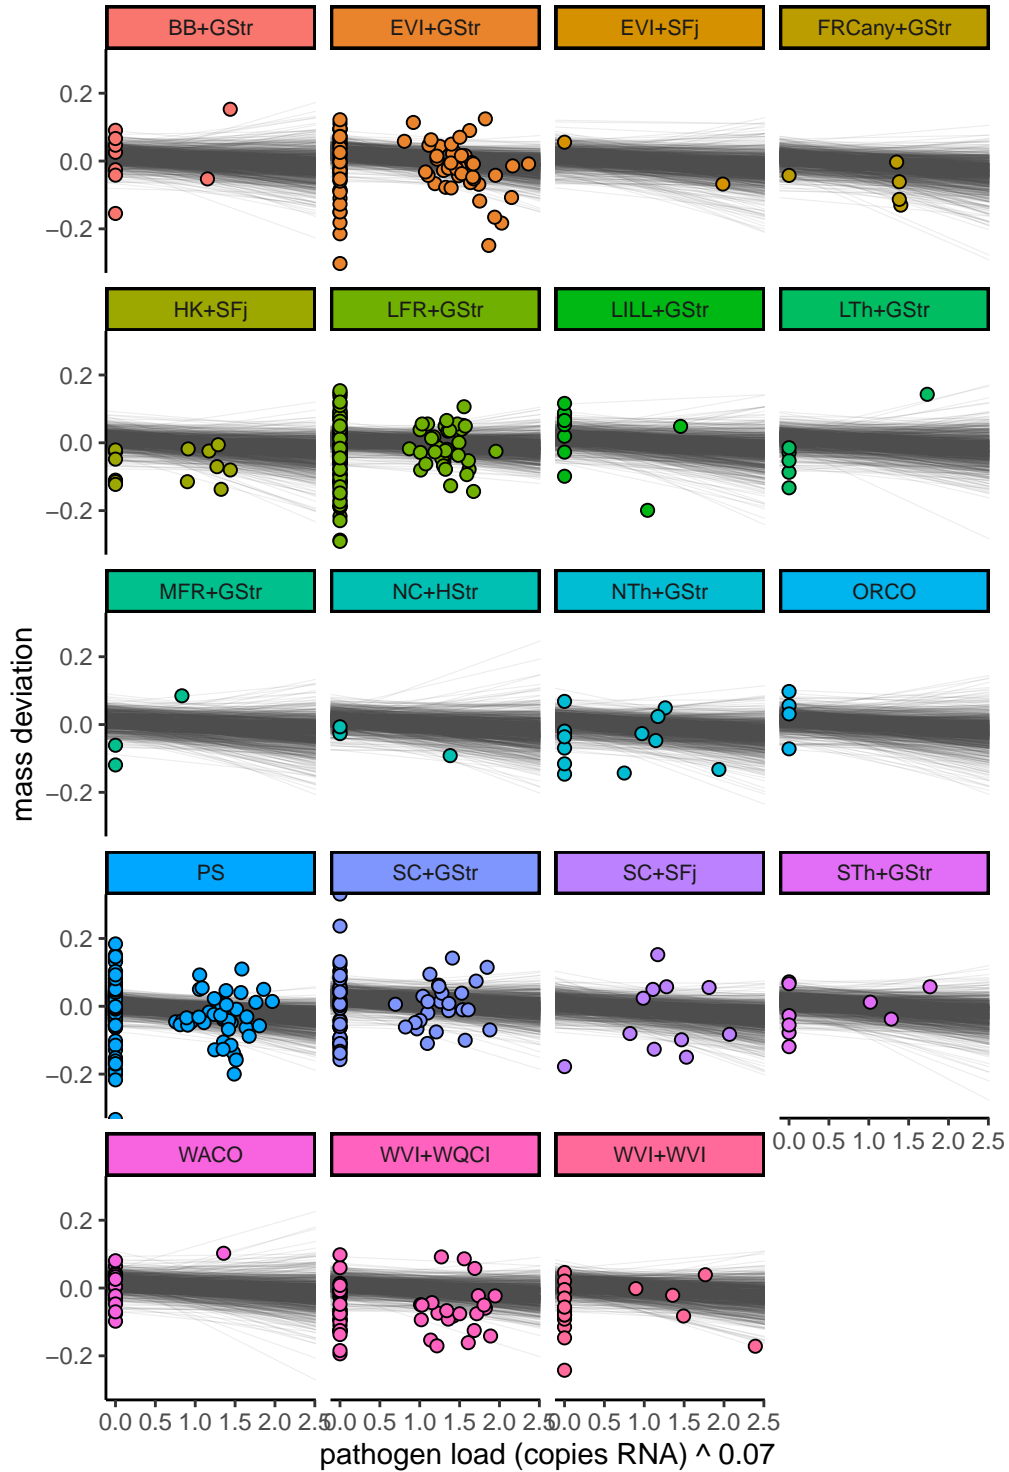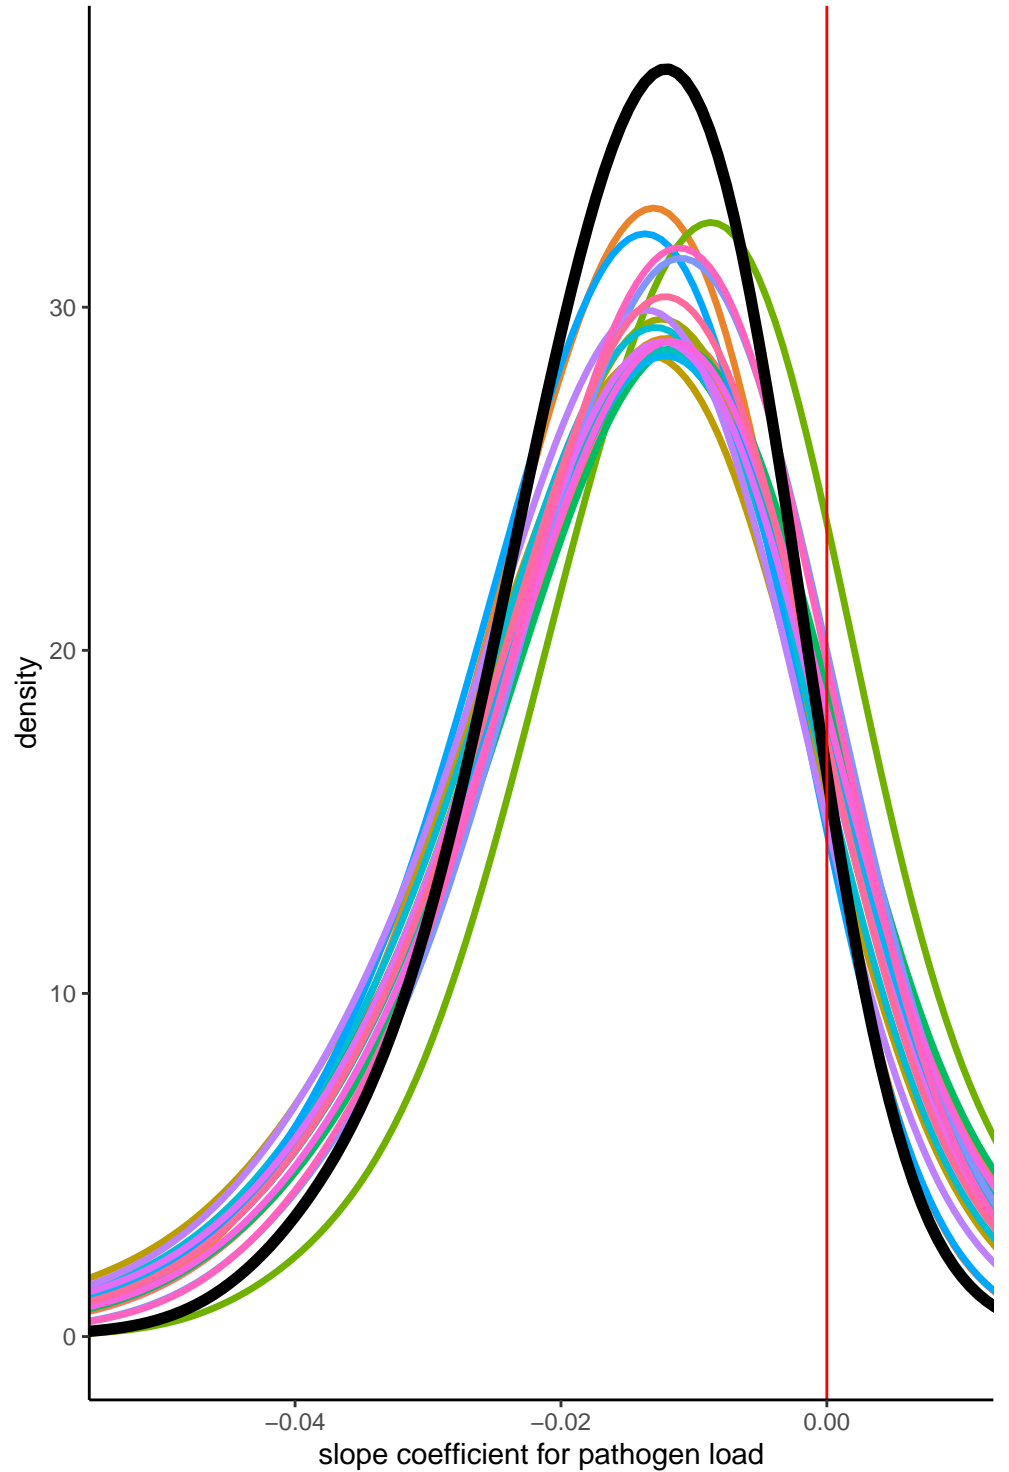

Parvicapsula pseudobranchicola FaWi

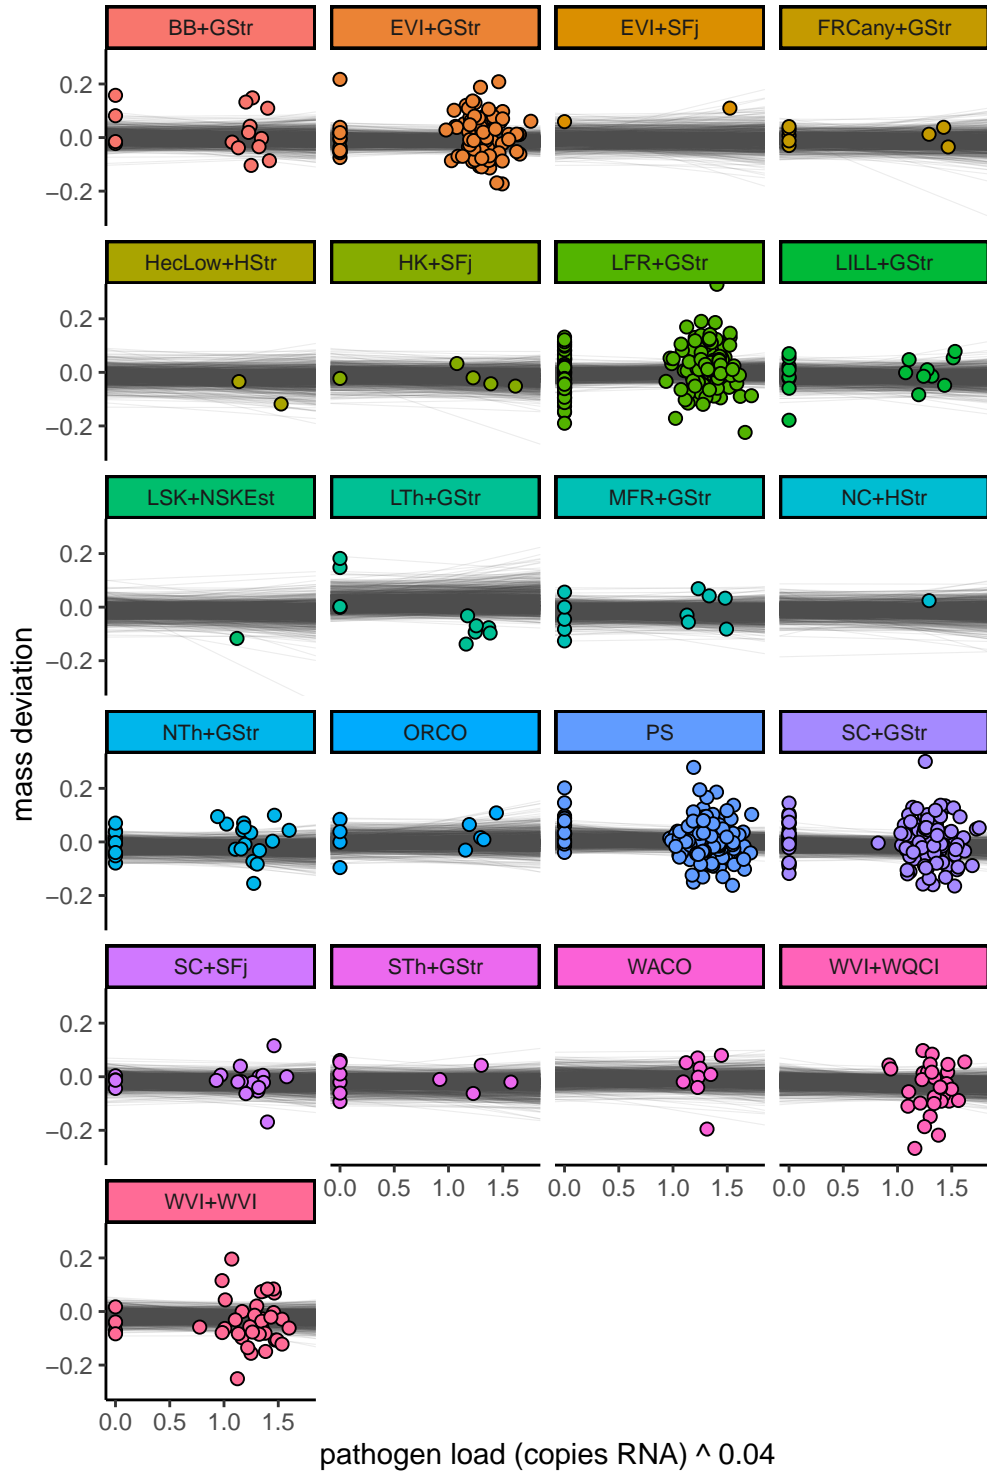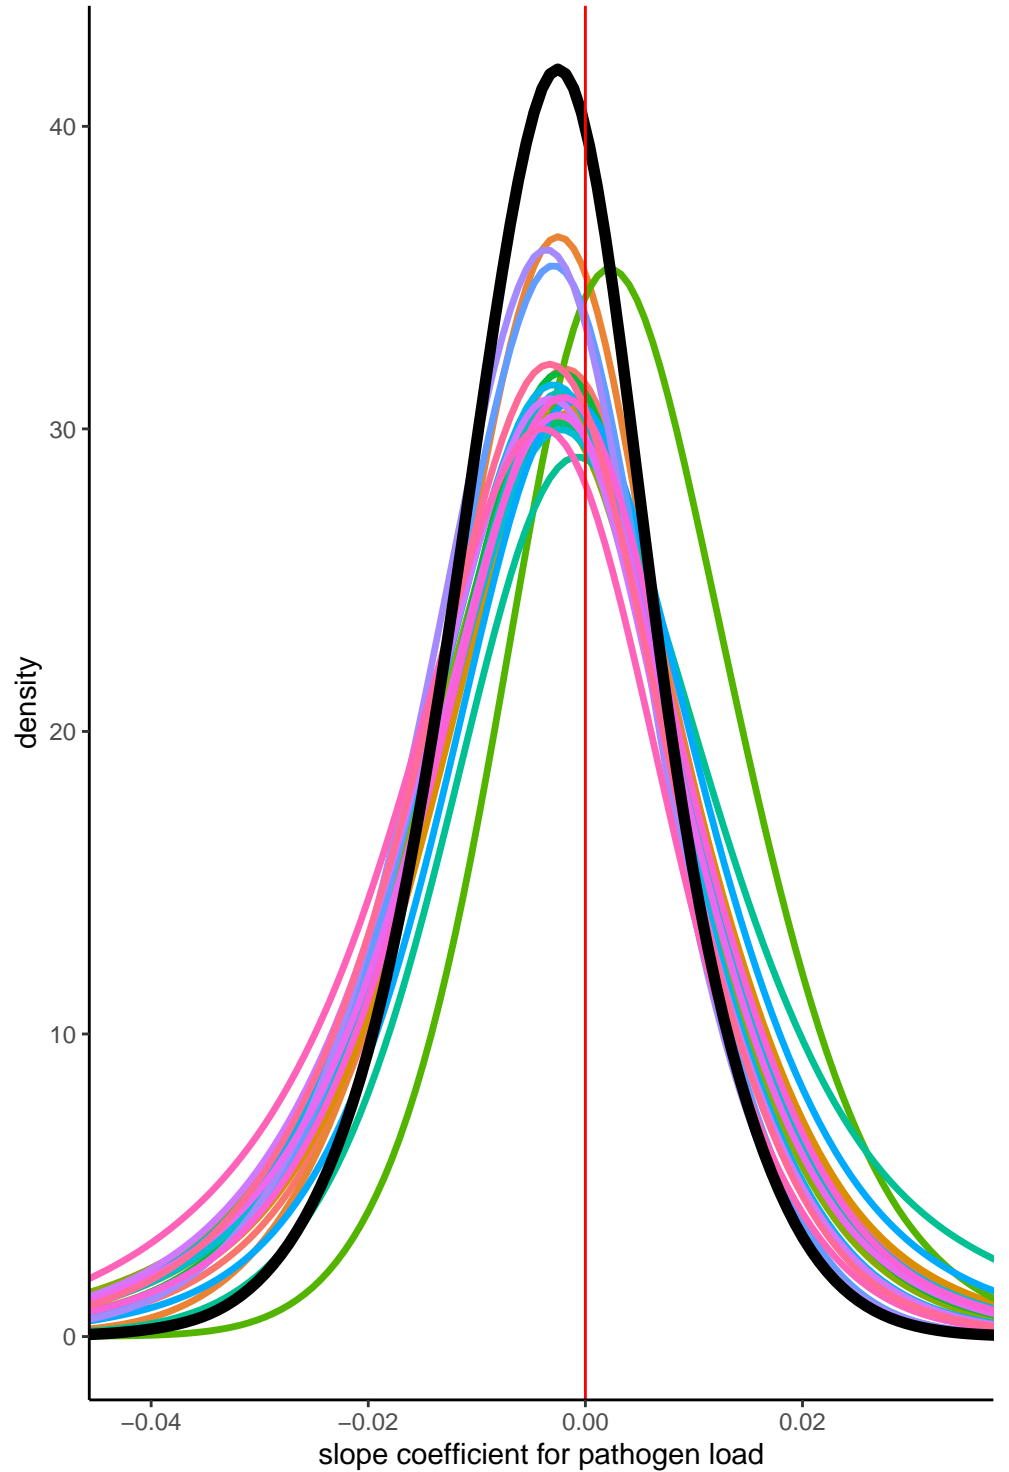

Paranucleospora theridion SpSu

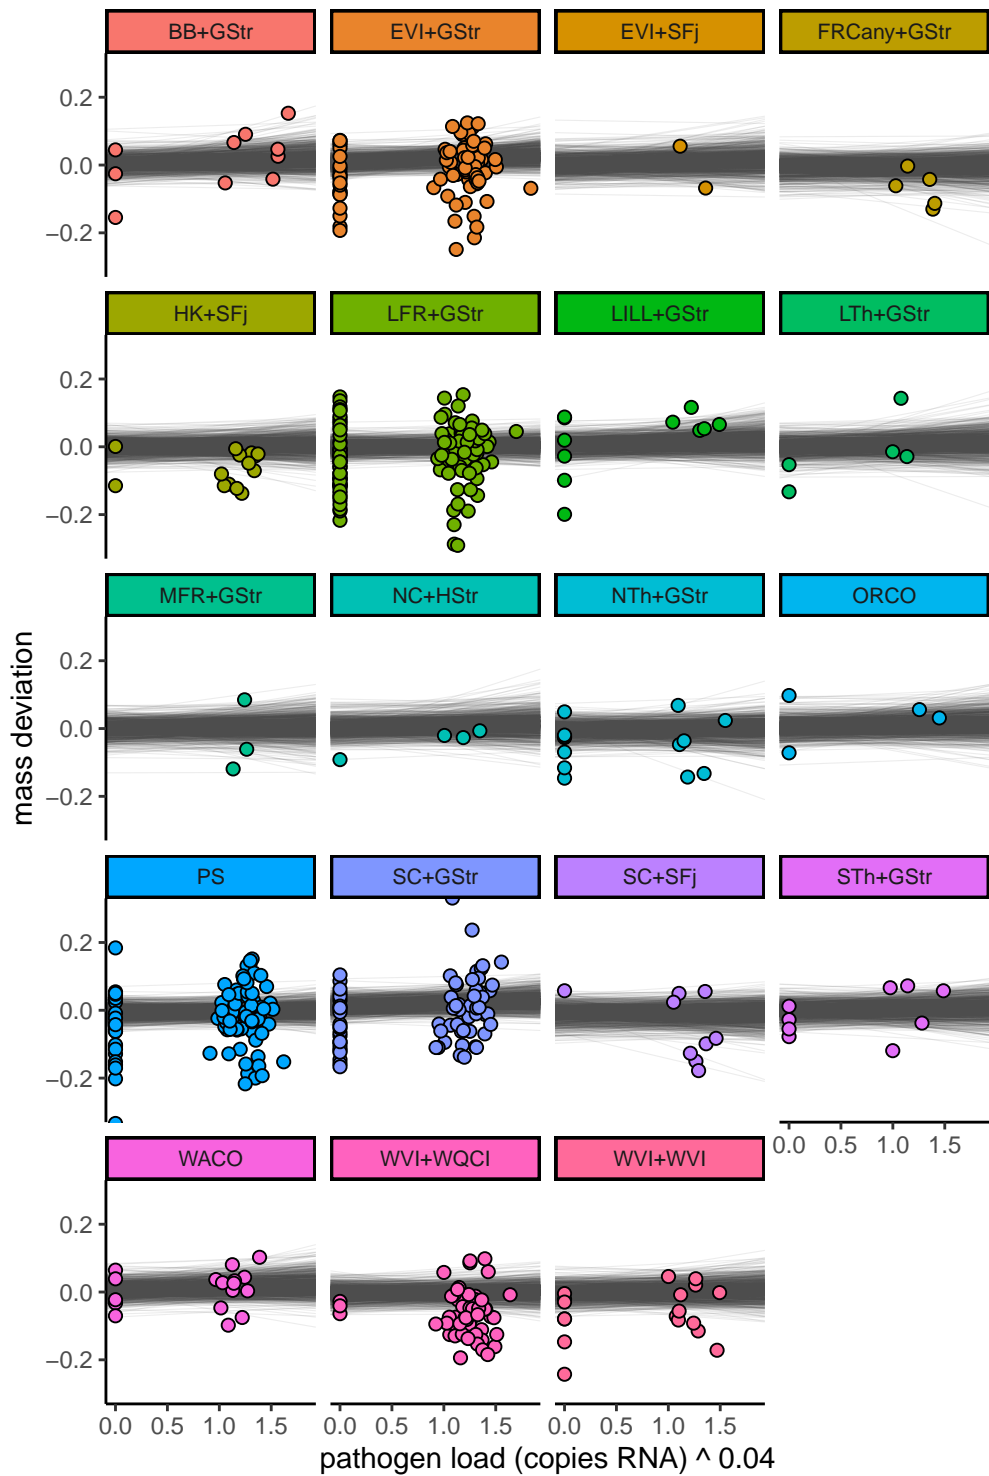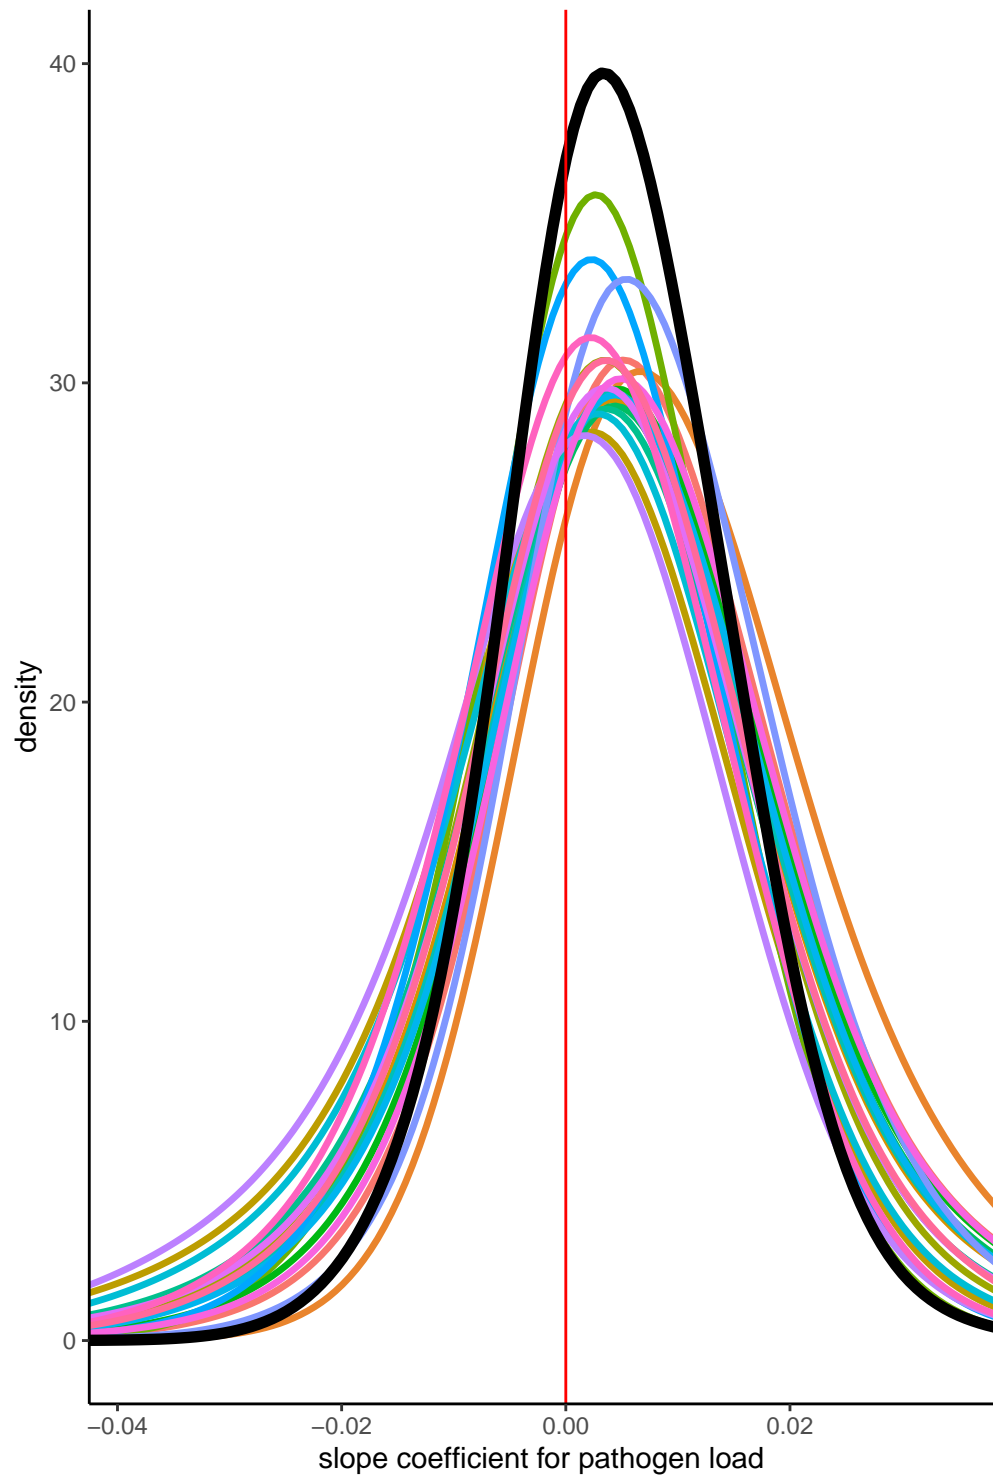

Paranucleospora theridion FaWi

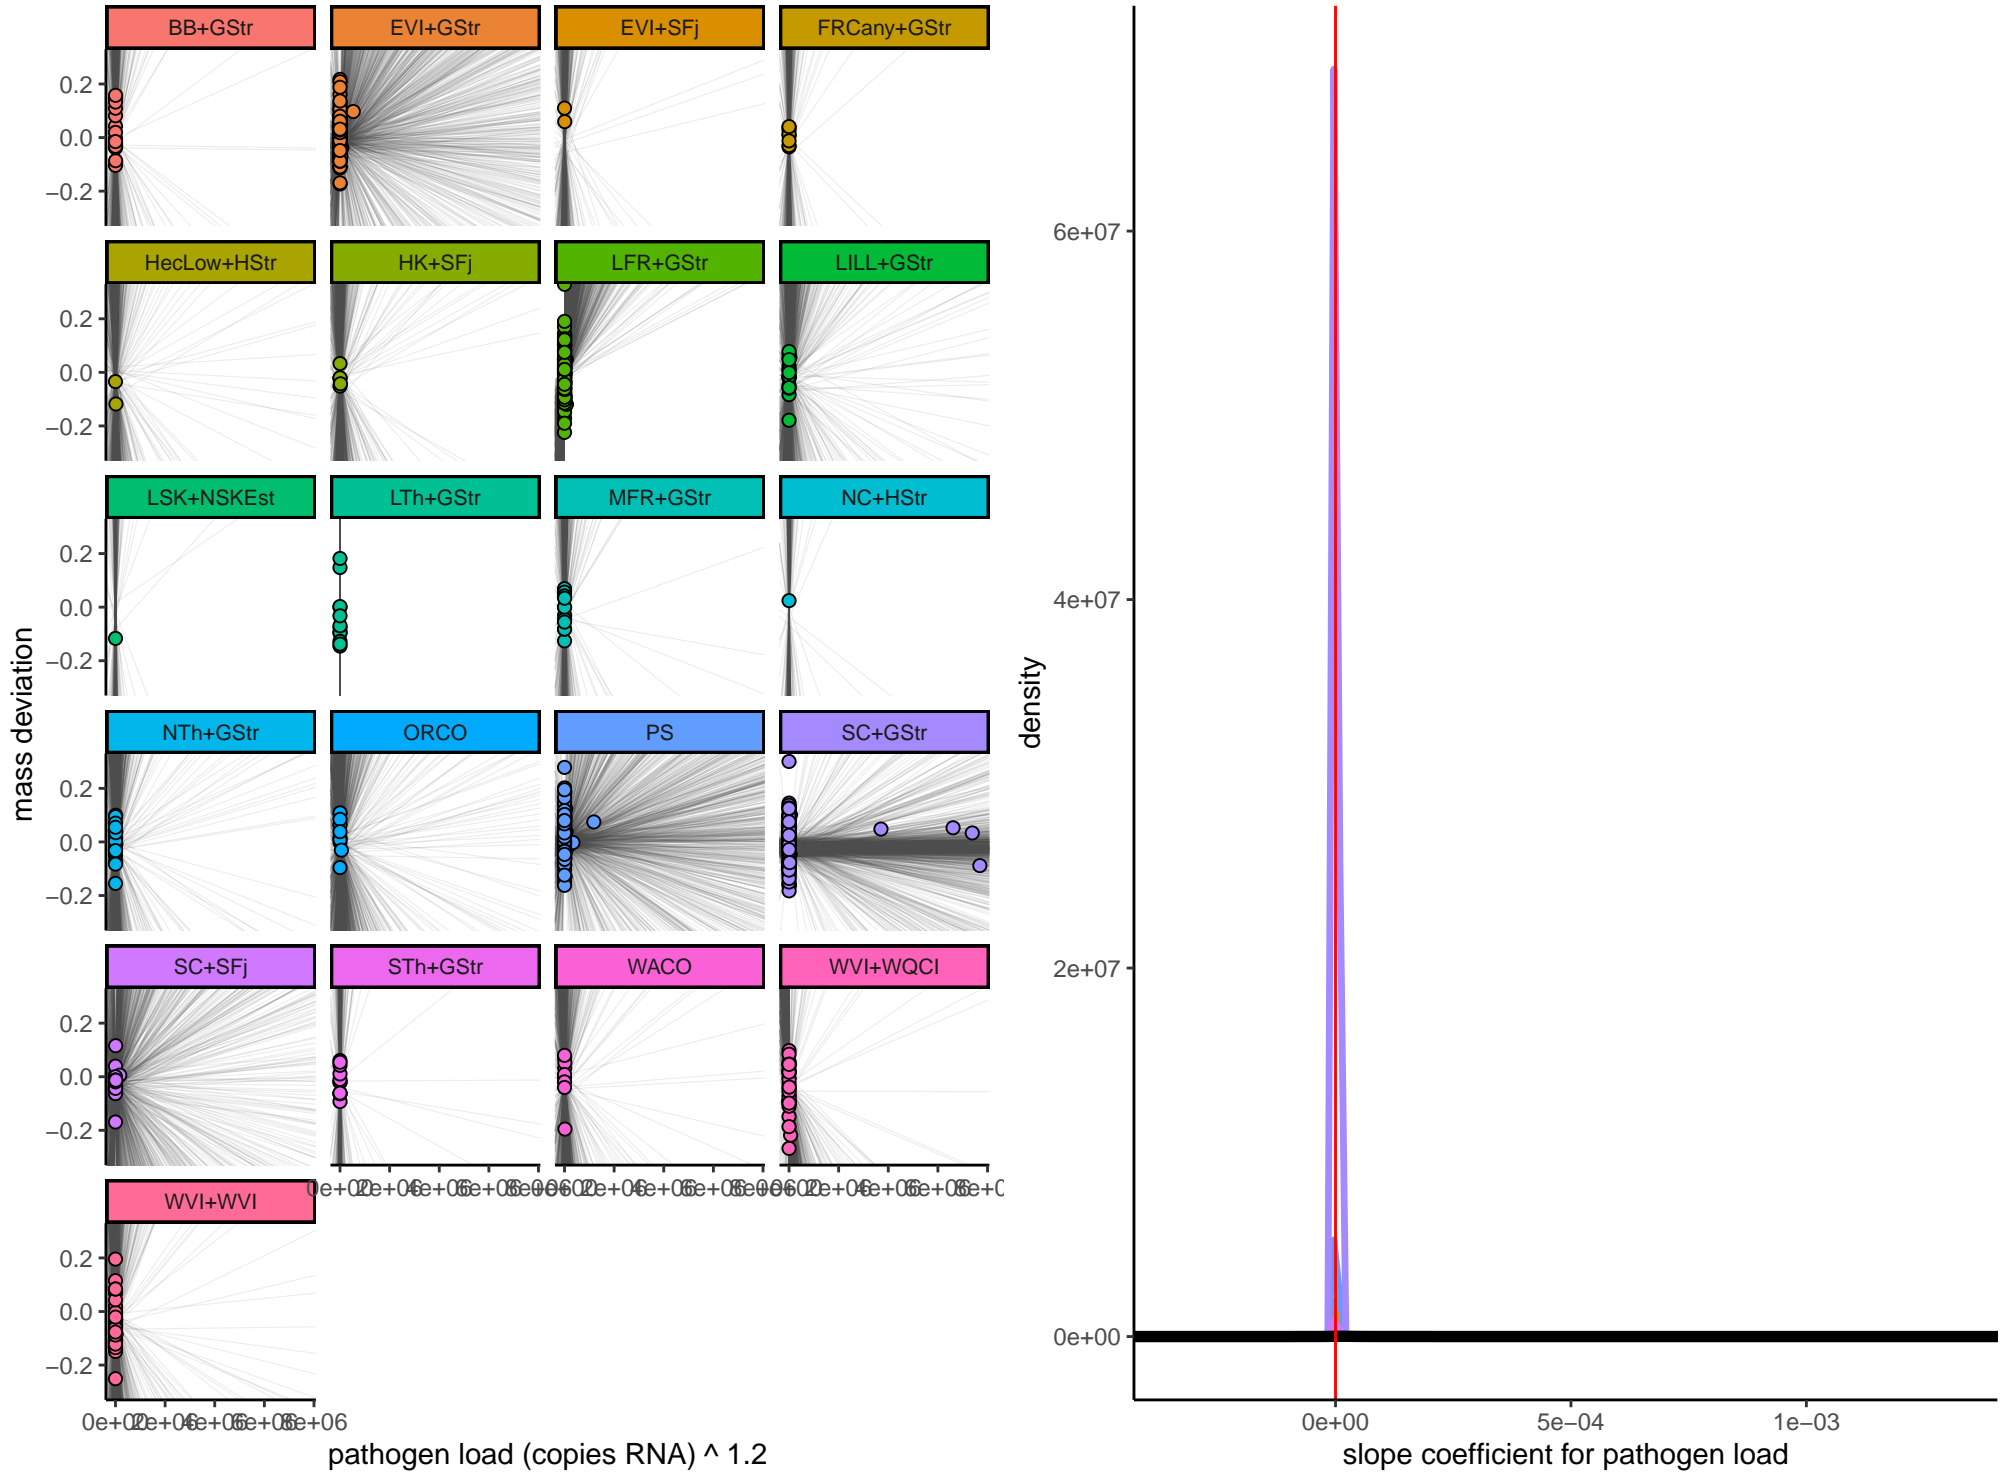



Piscine Orthoreovirus SpSu

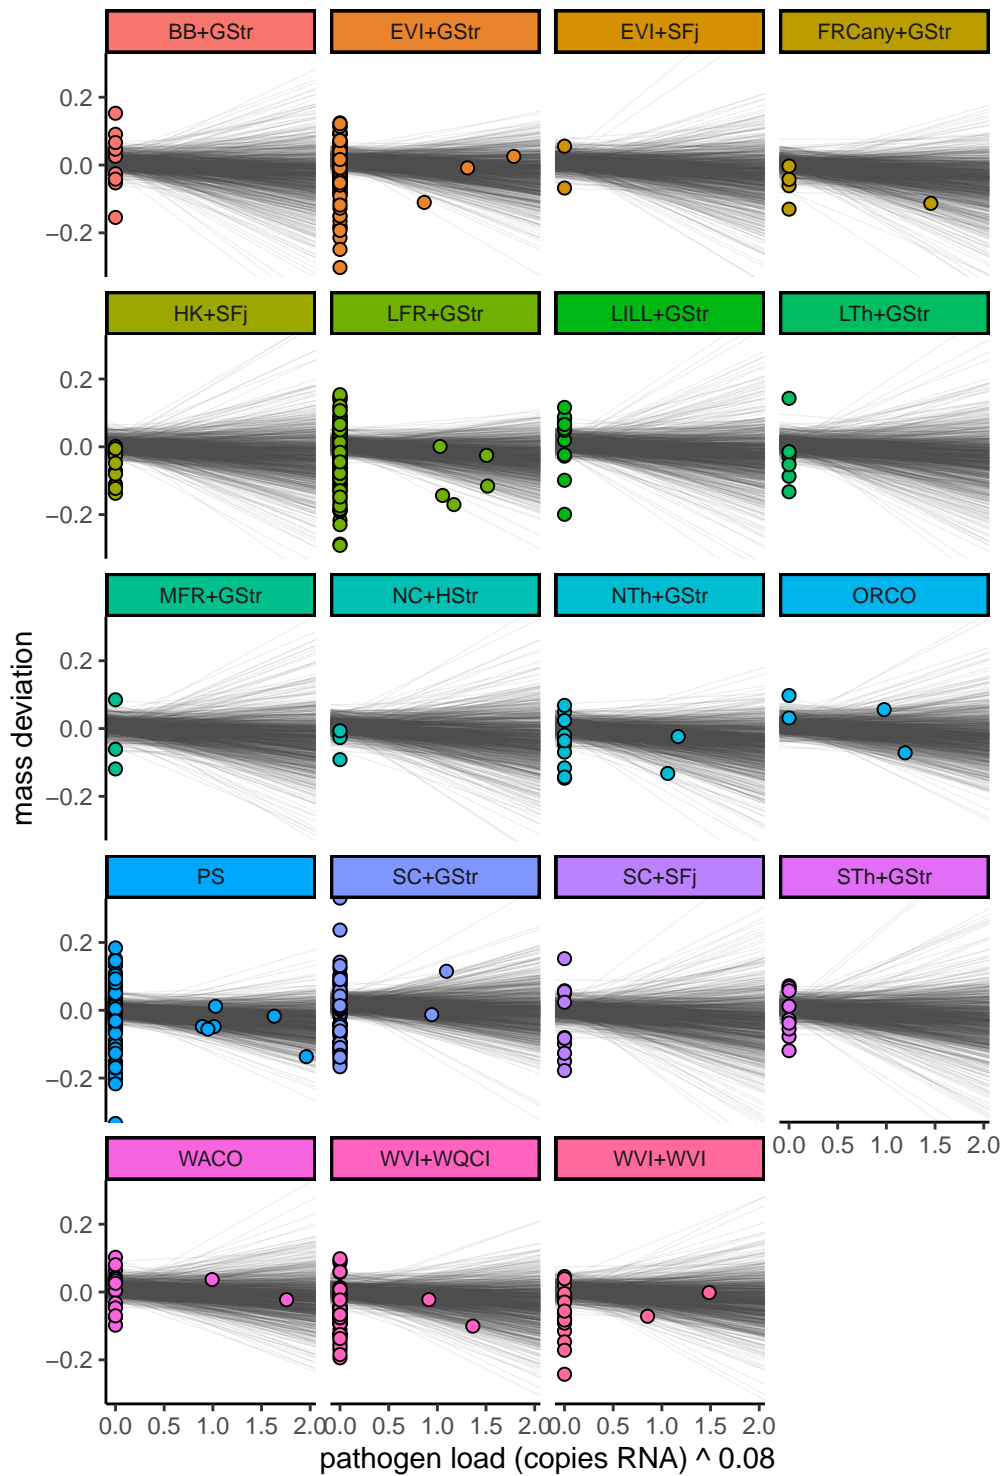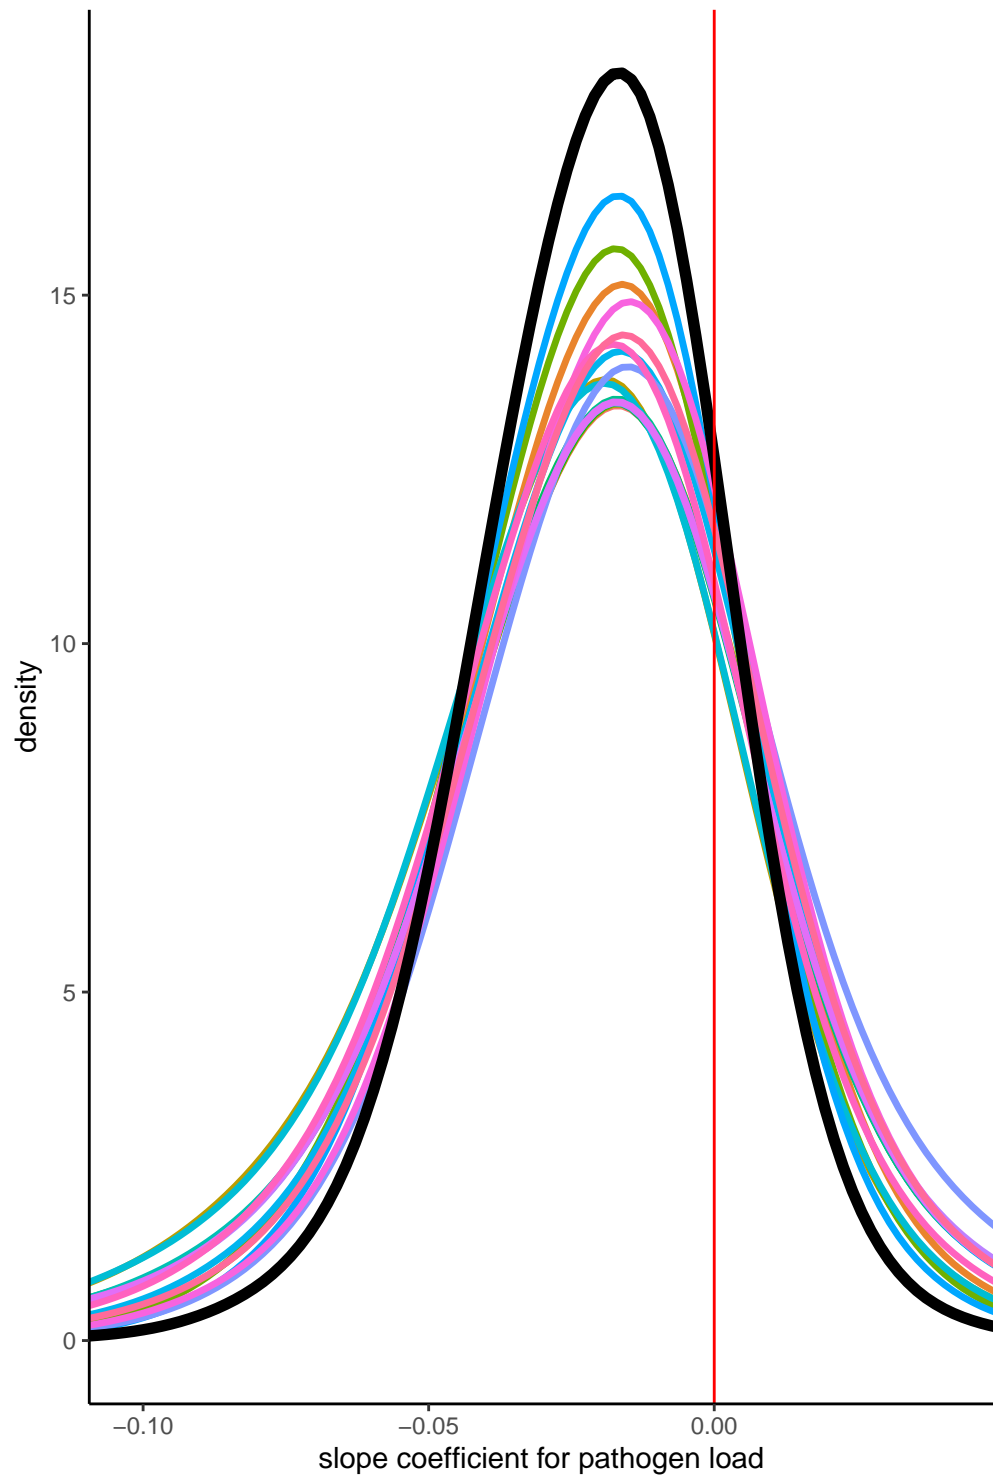

Piscine Orthoreovirus FaWi

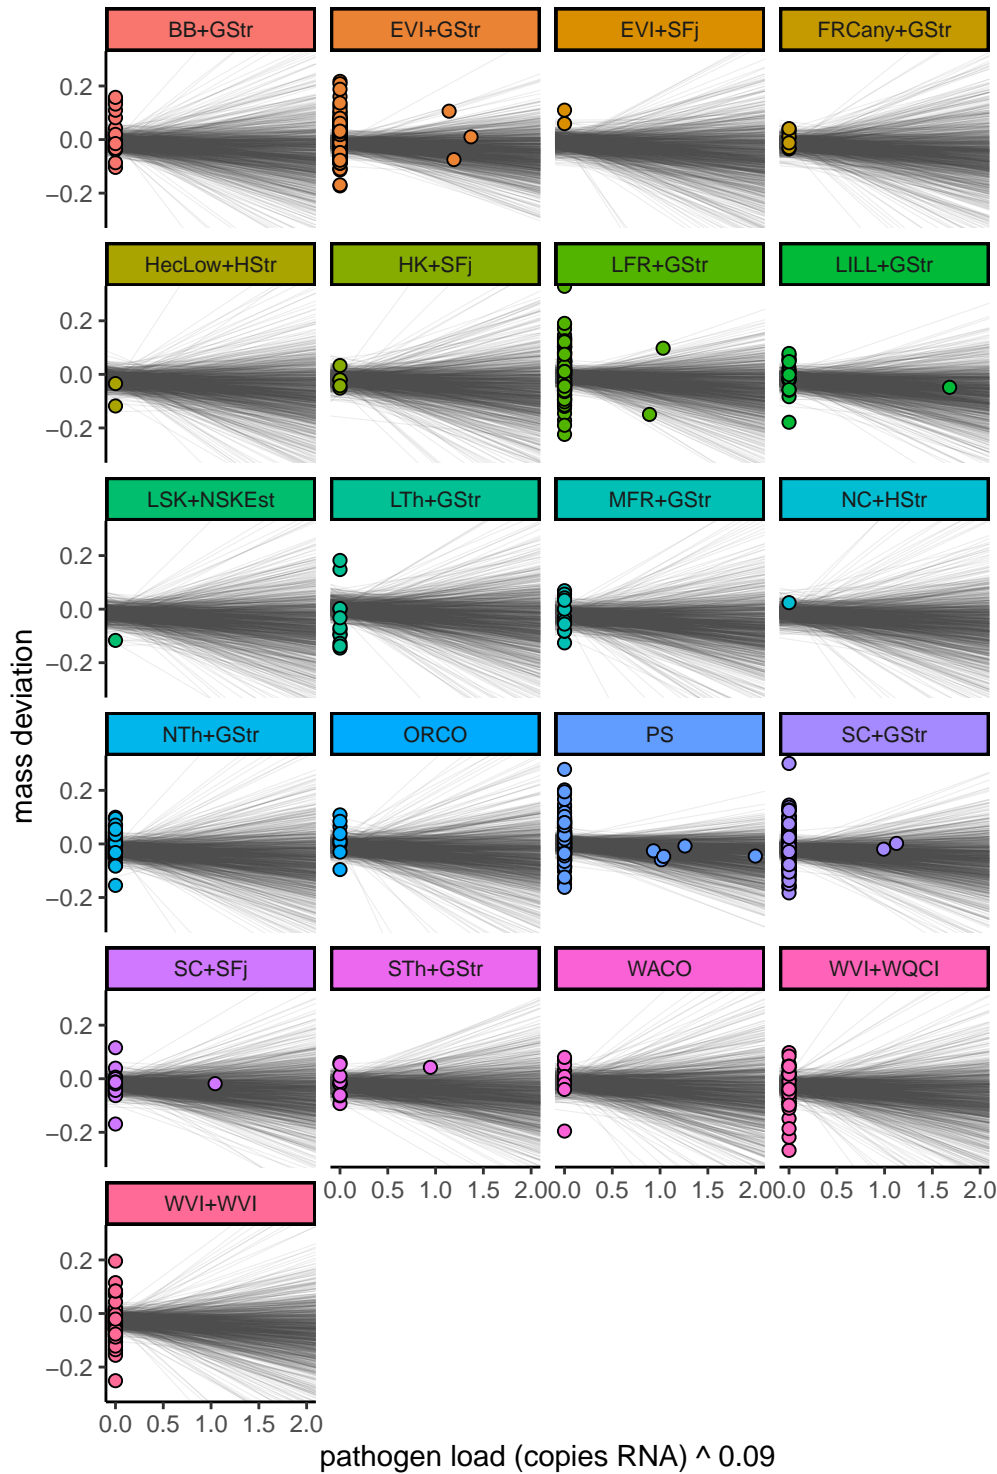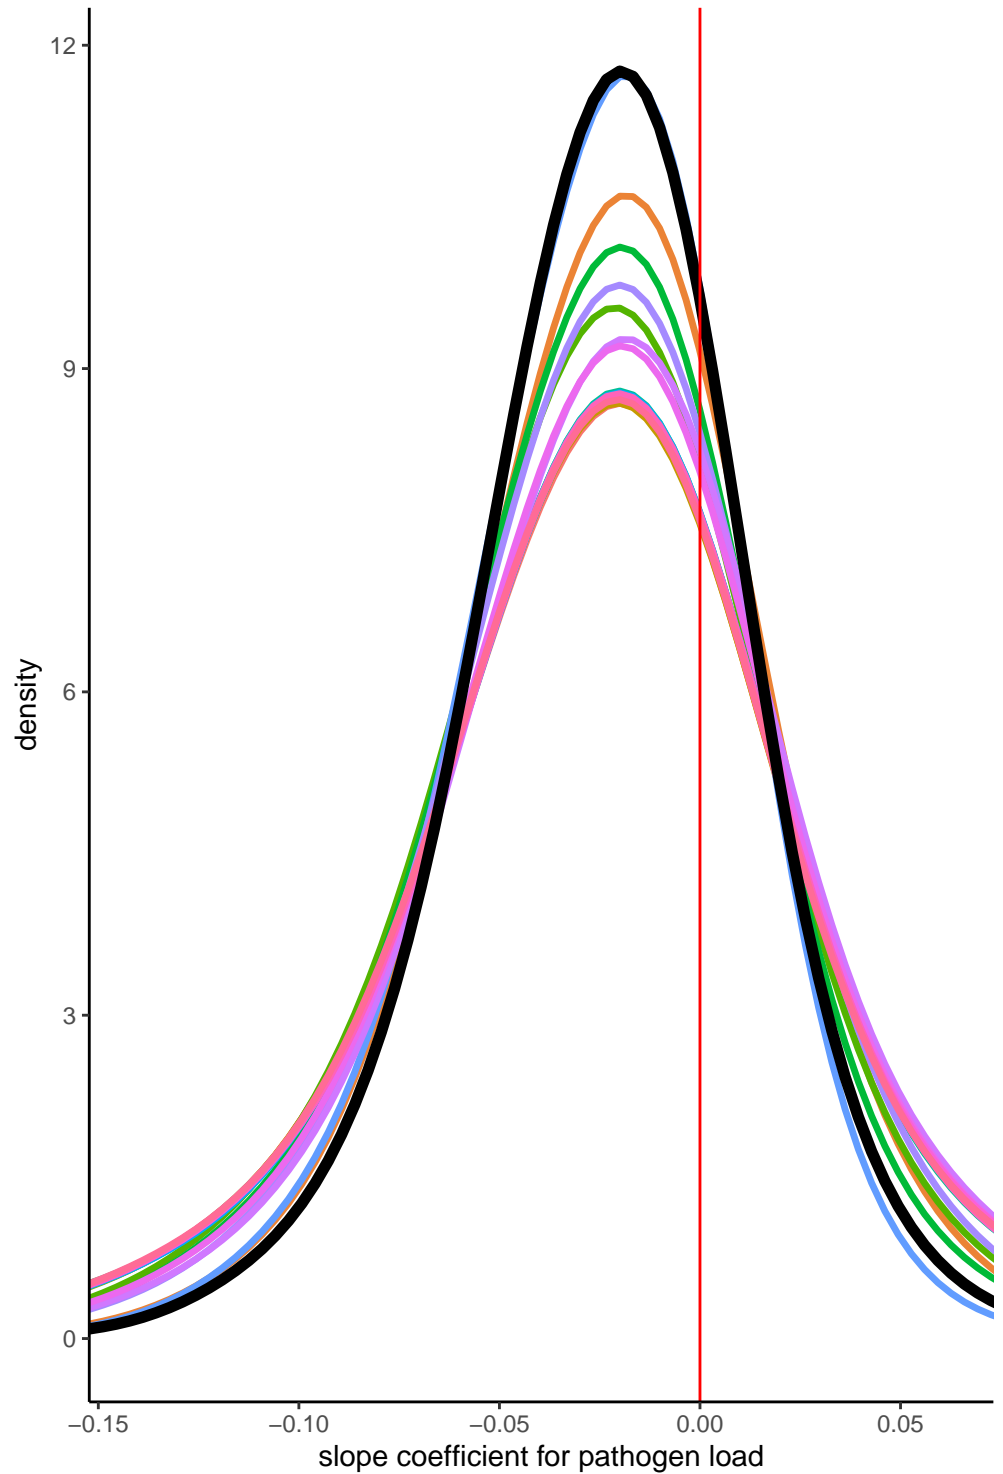

Candidatus Syngnamydia salmonis SpSu

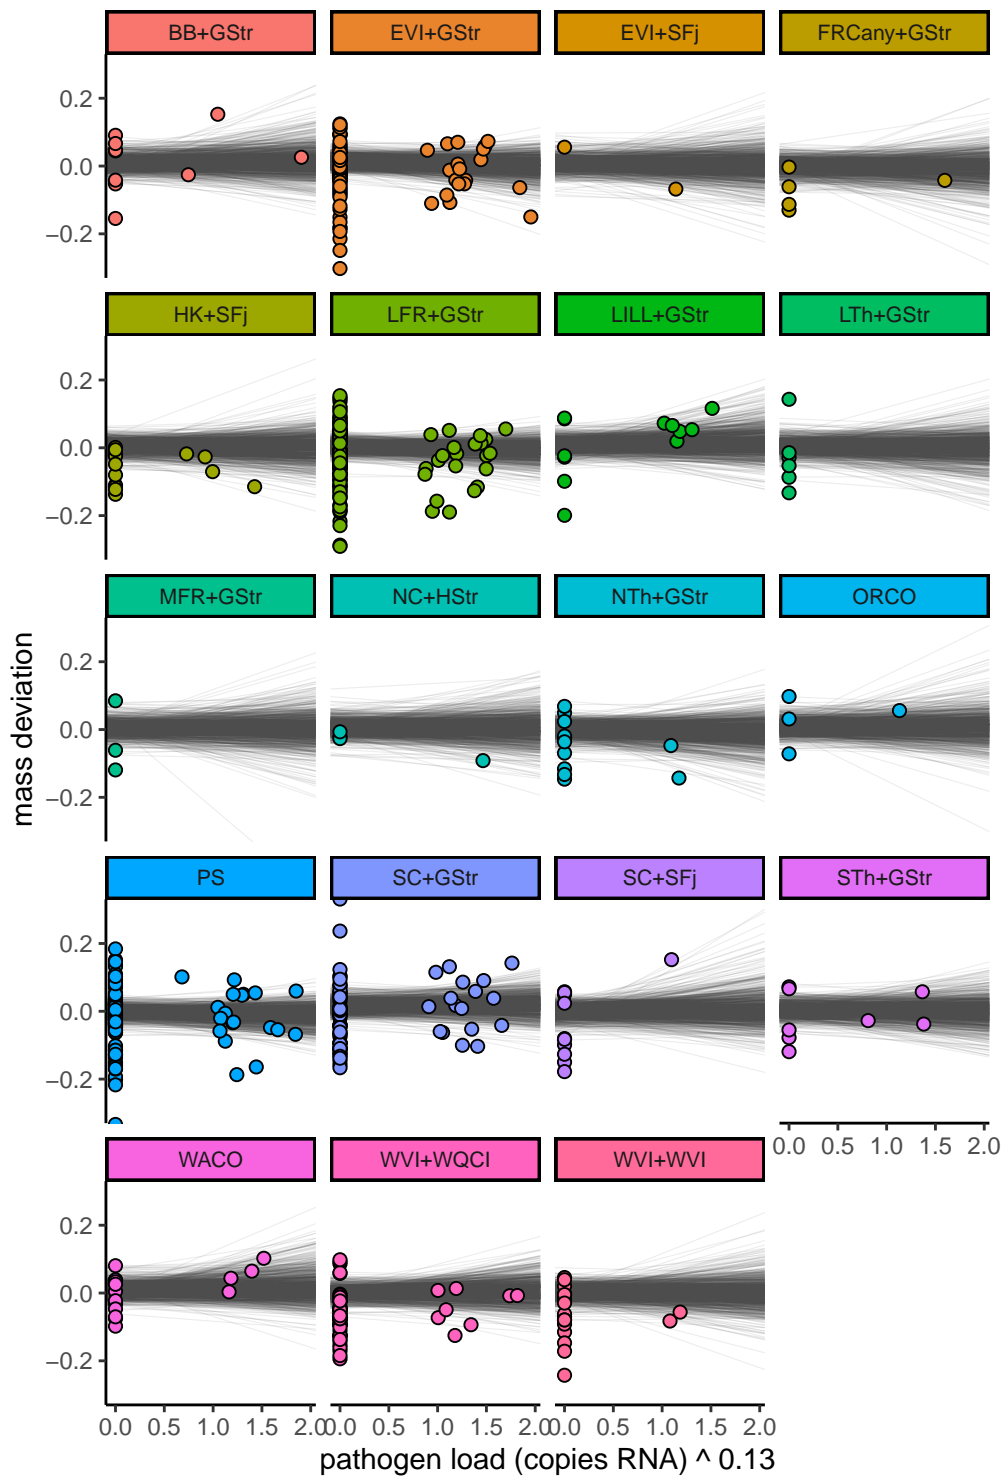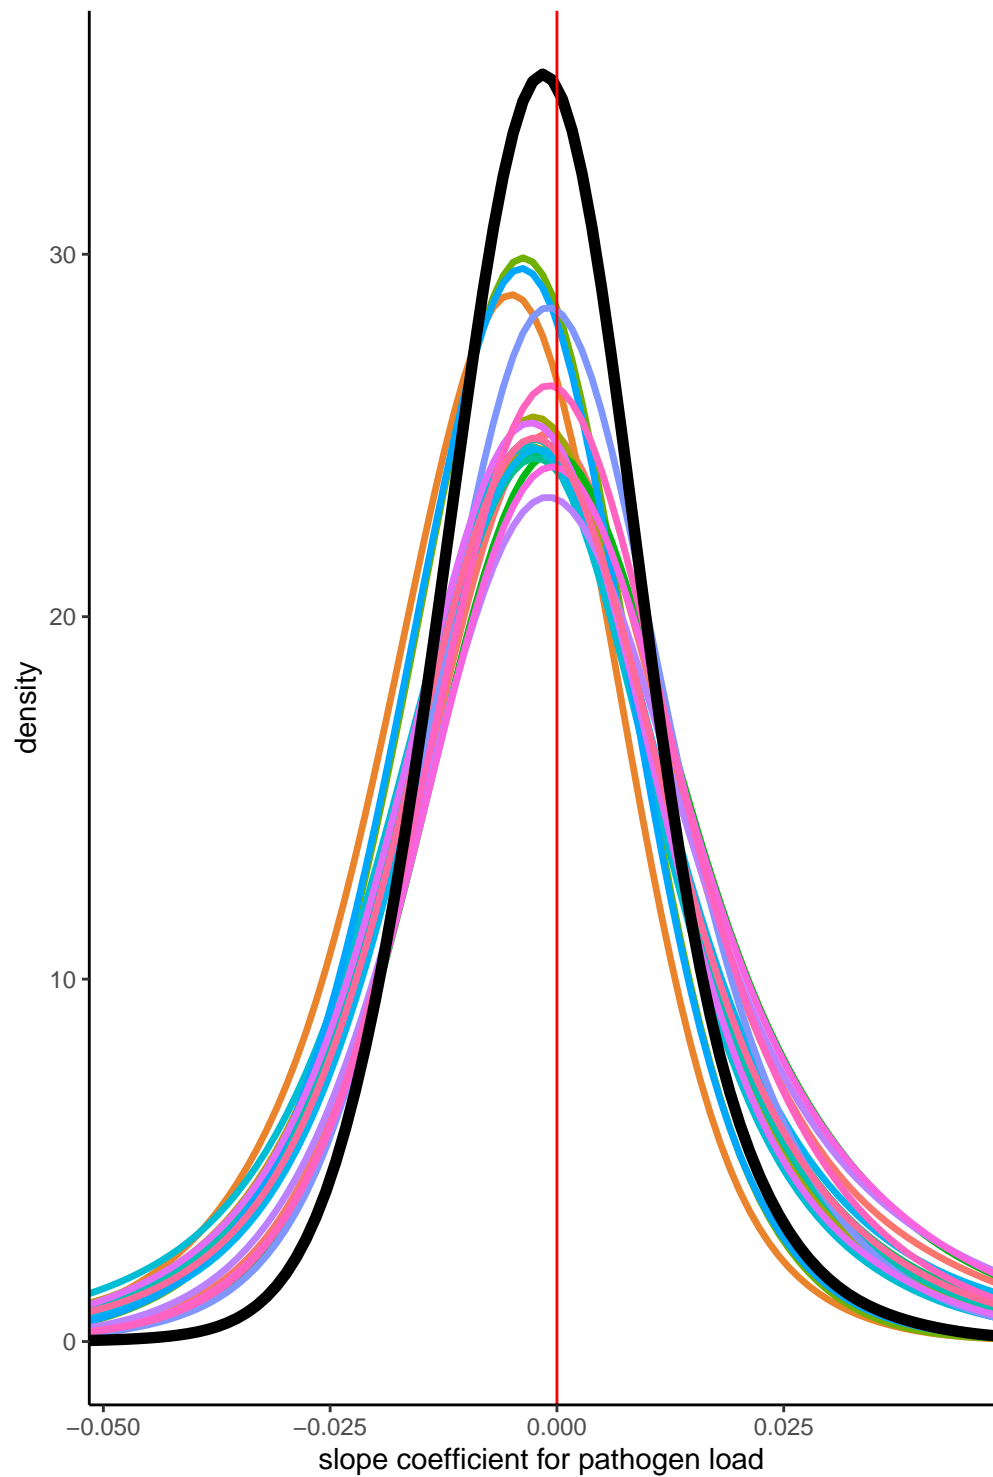

Candidatus Syngnamydia salmonis FaWi

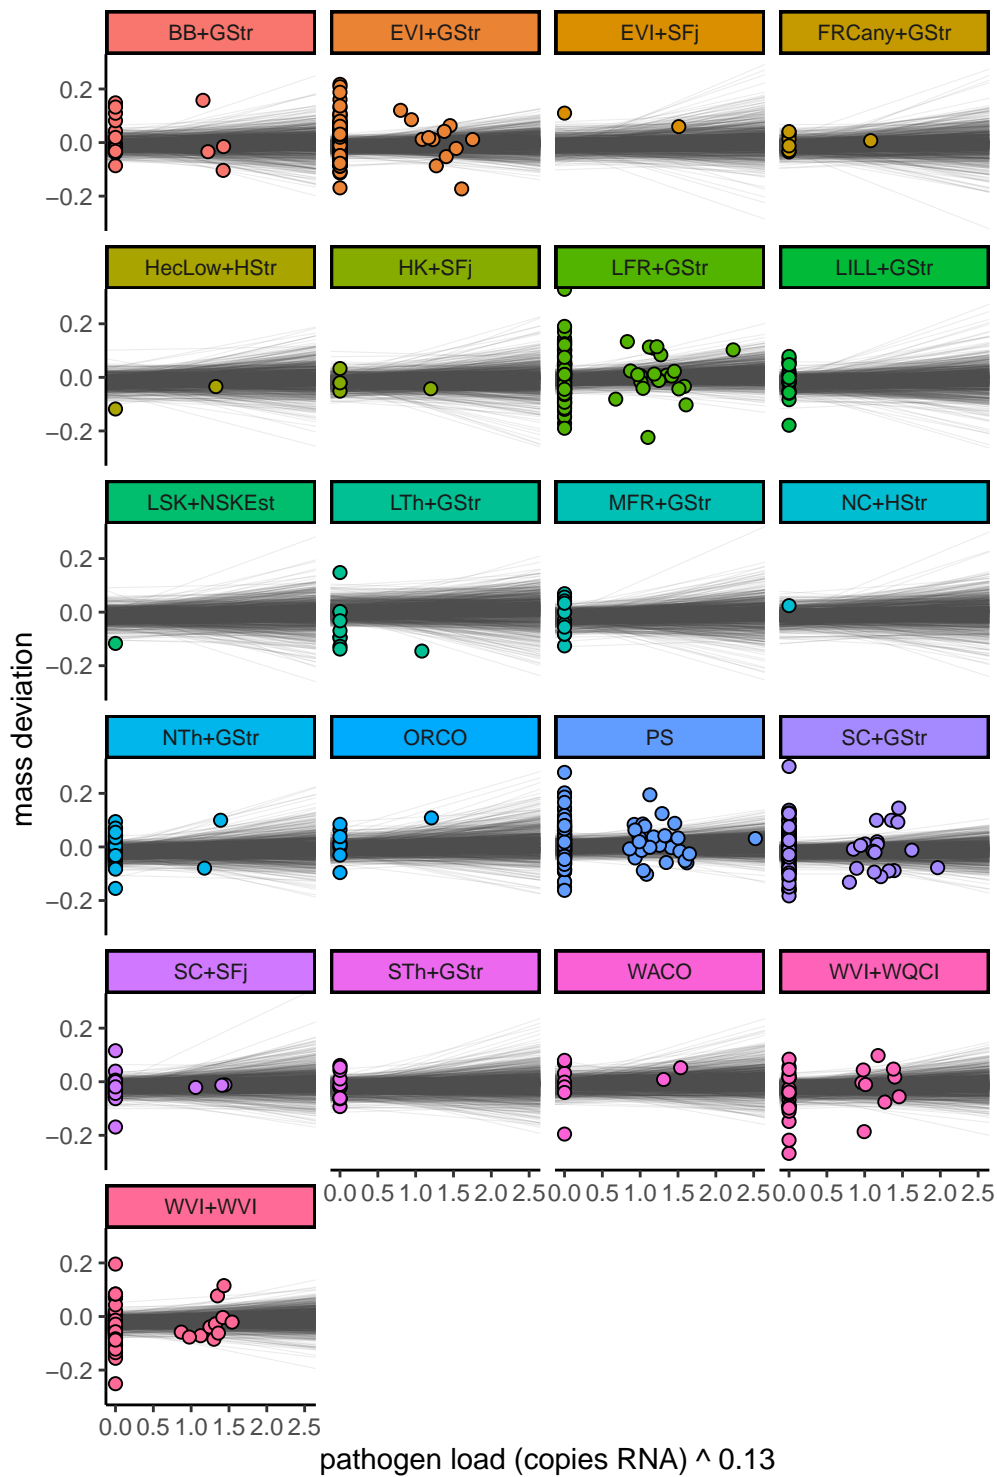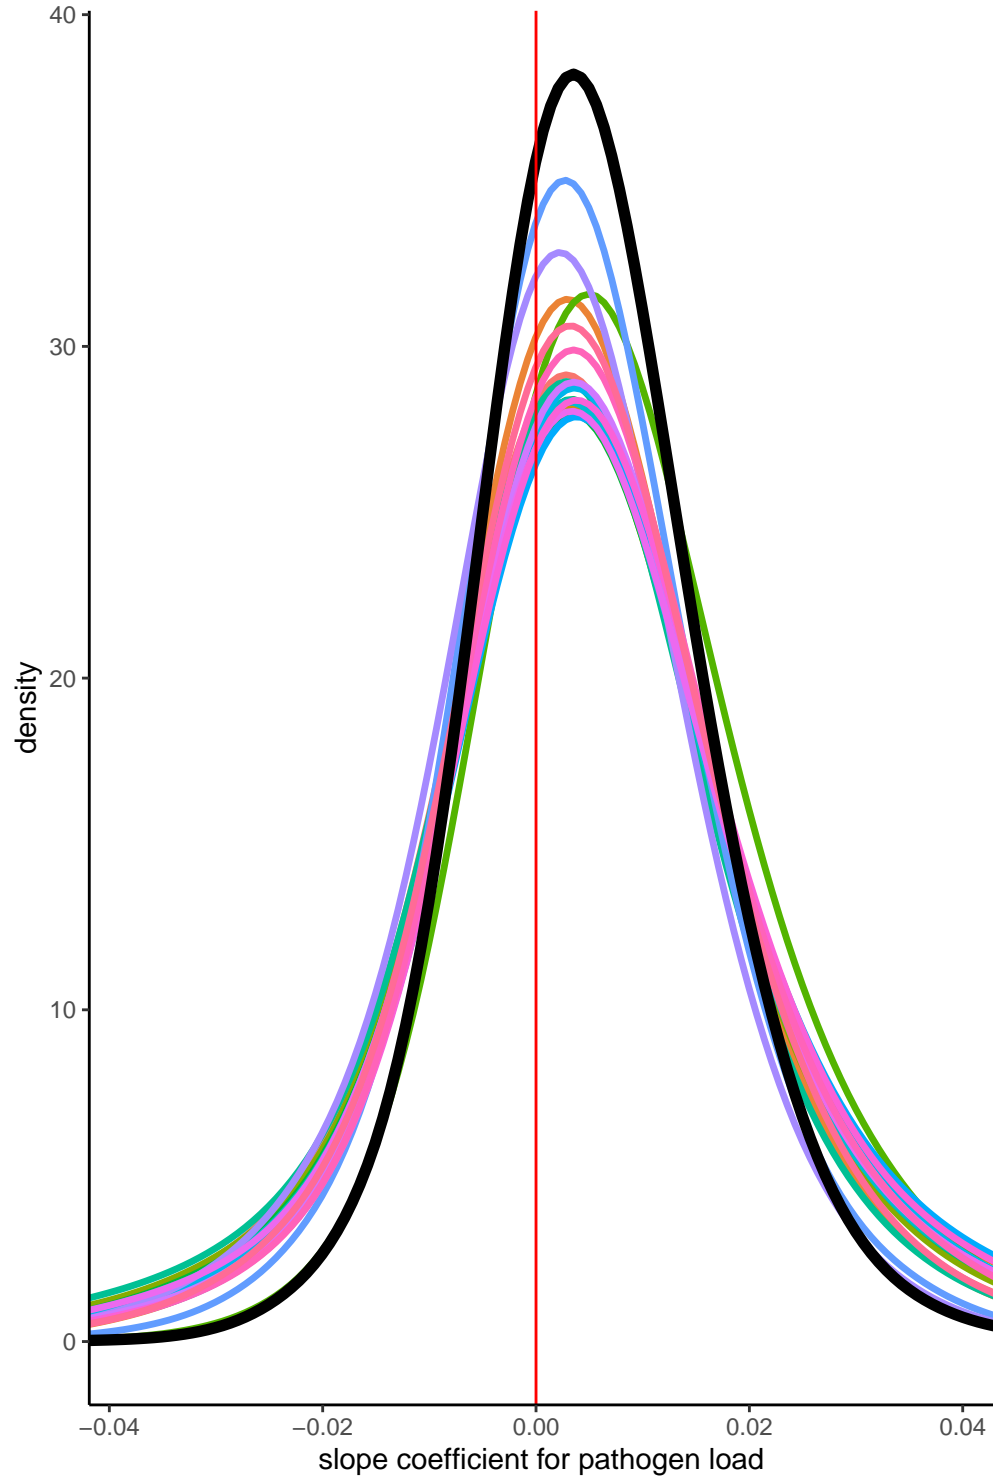

Sphaerothecum destruens SpSu

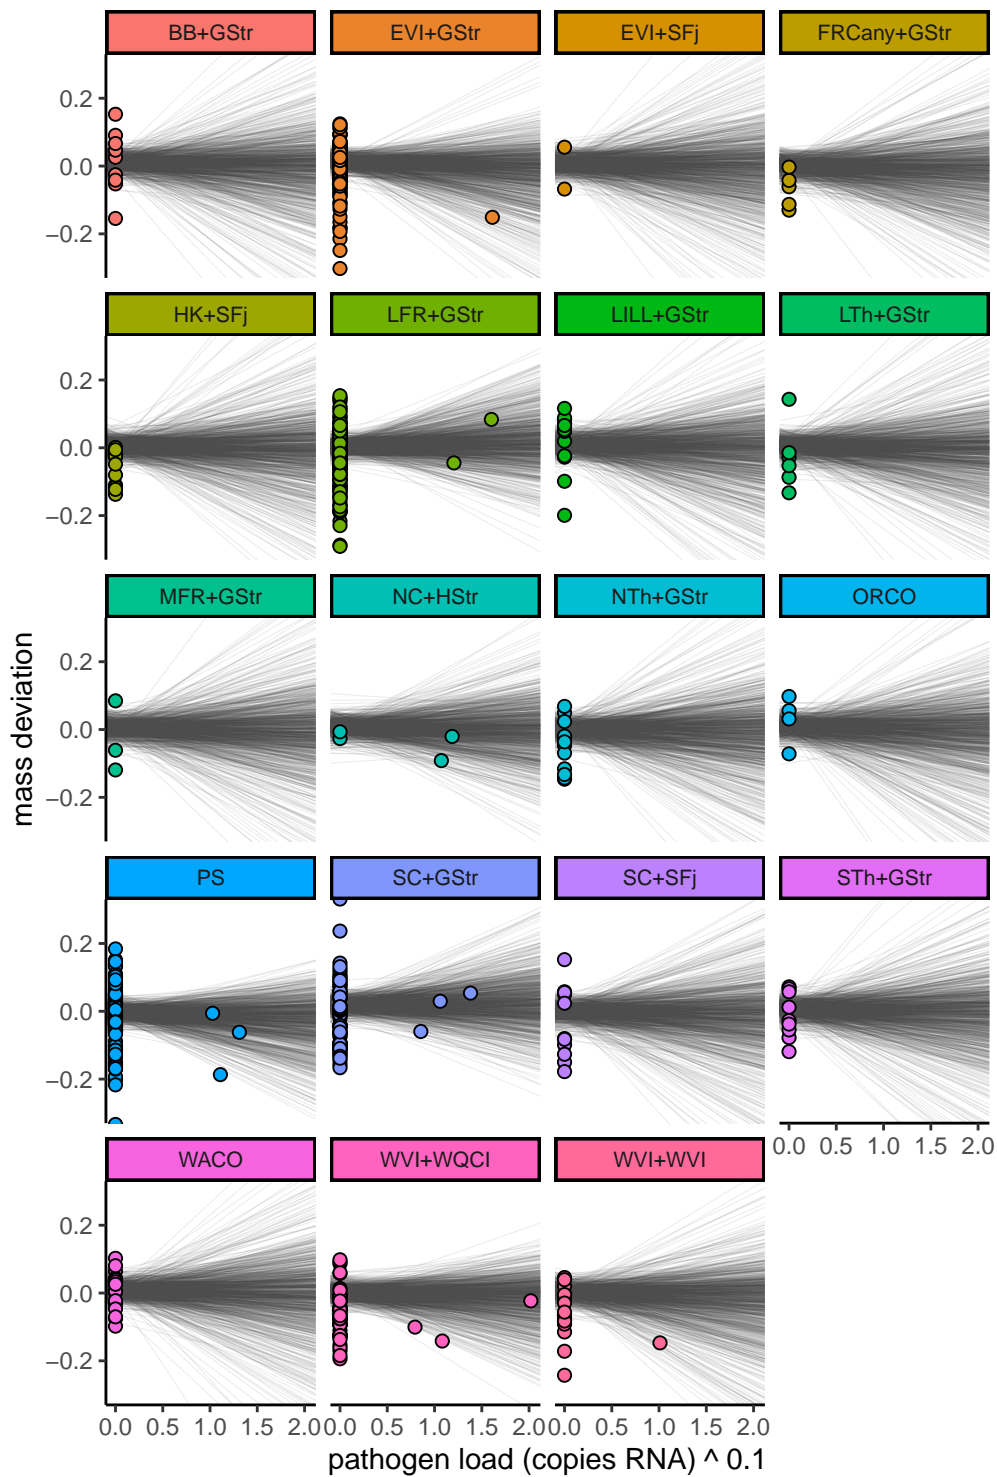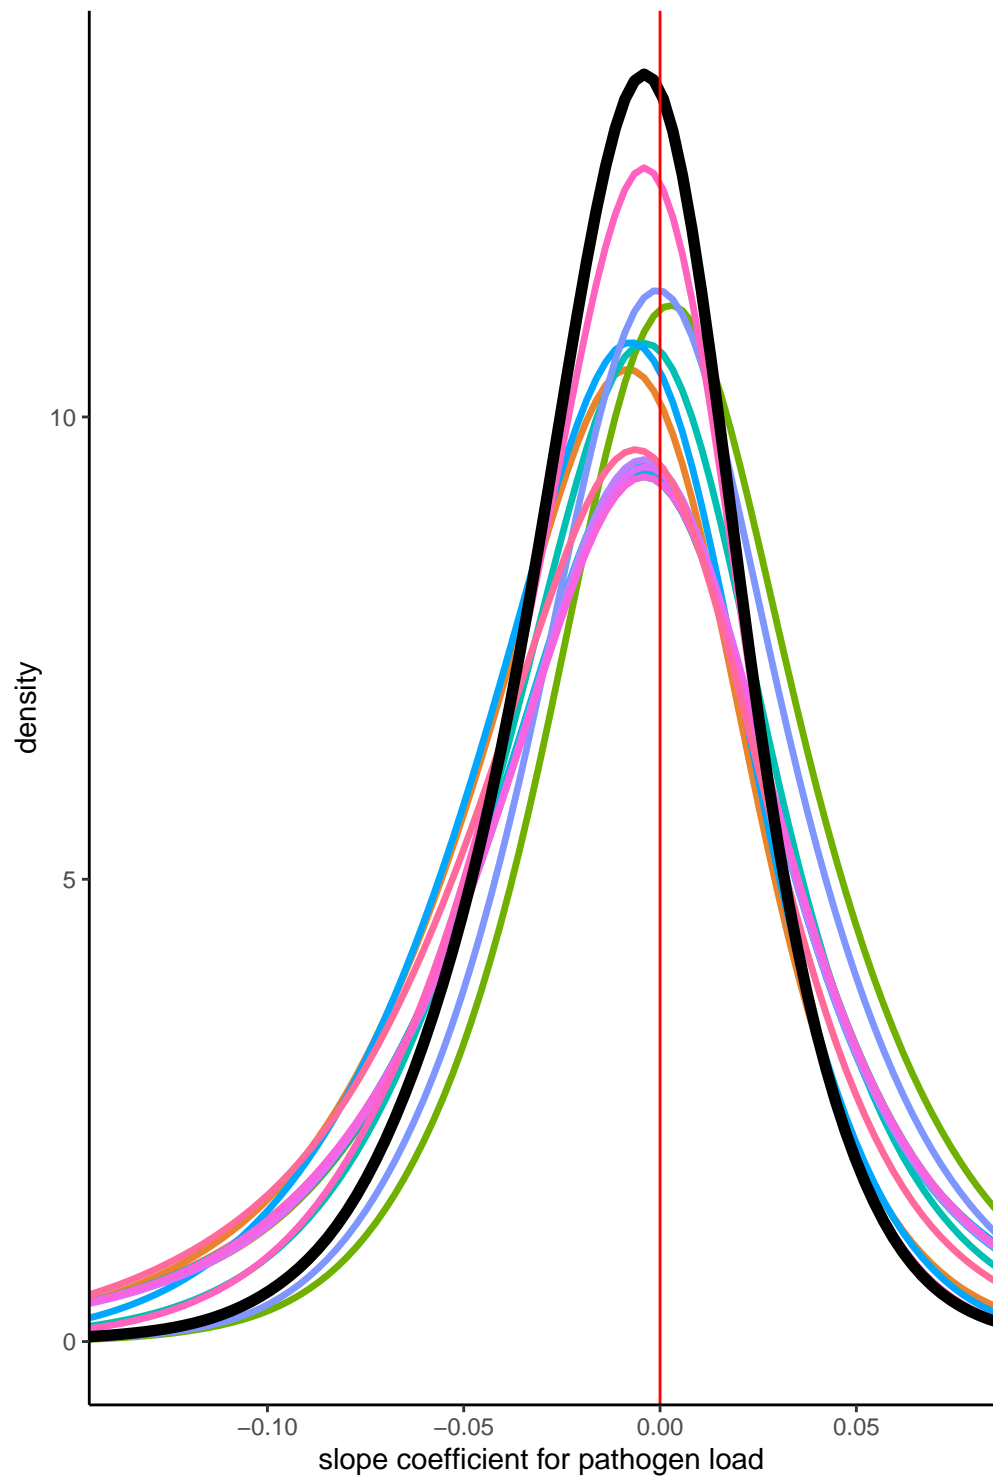

Sphaerothecum destruens FaWi

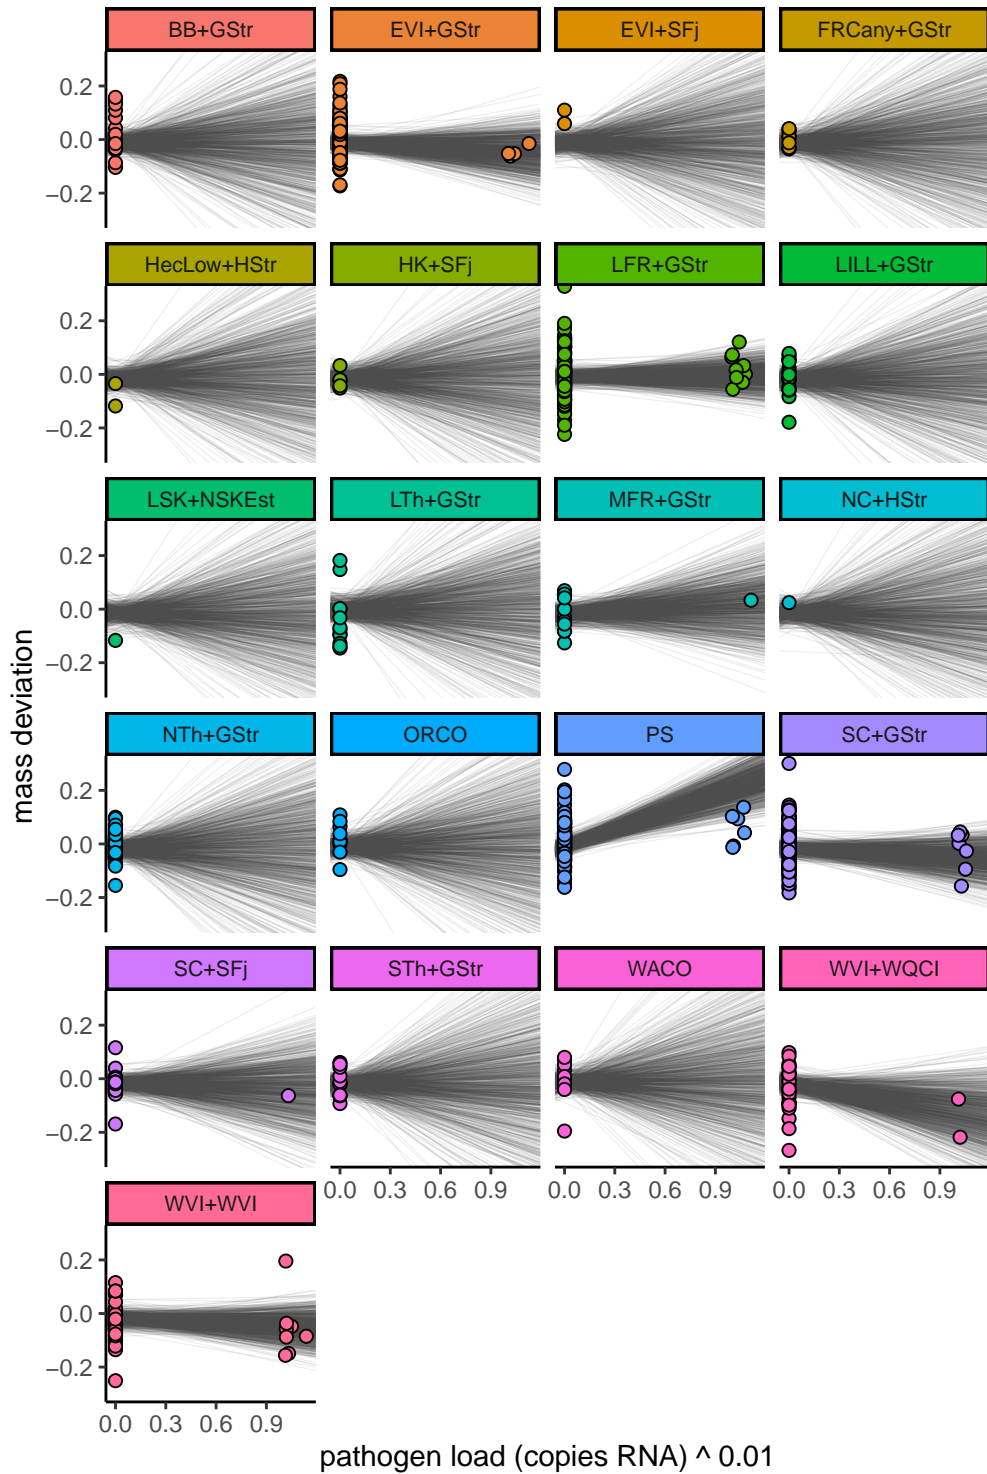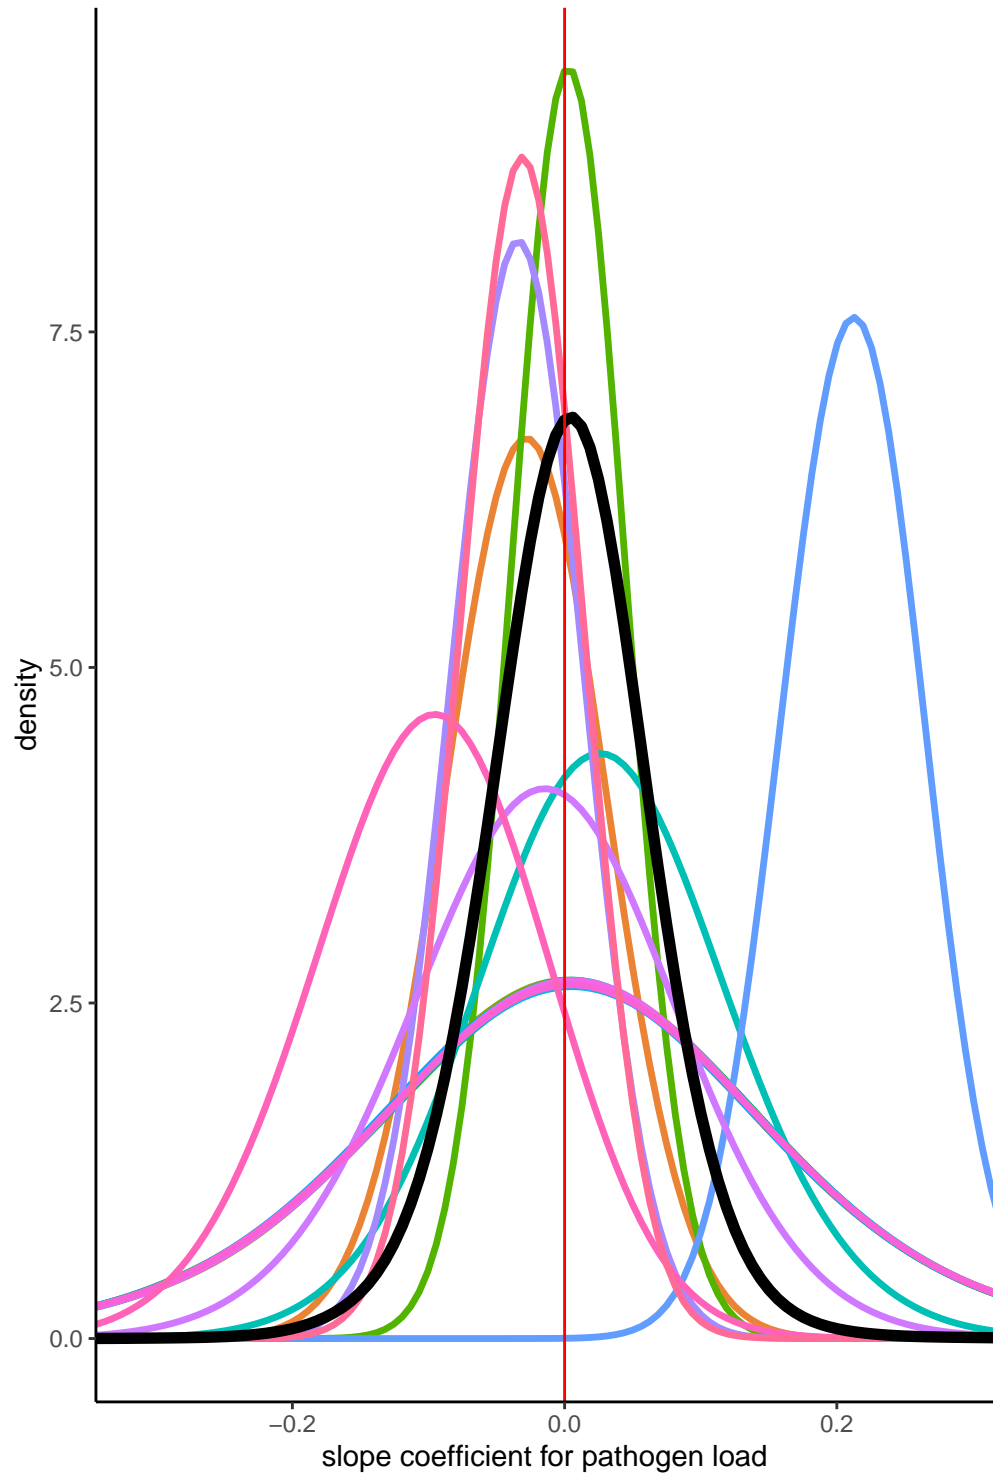

Tetracapsuloides bryosalmonae SpSu

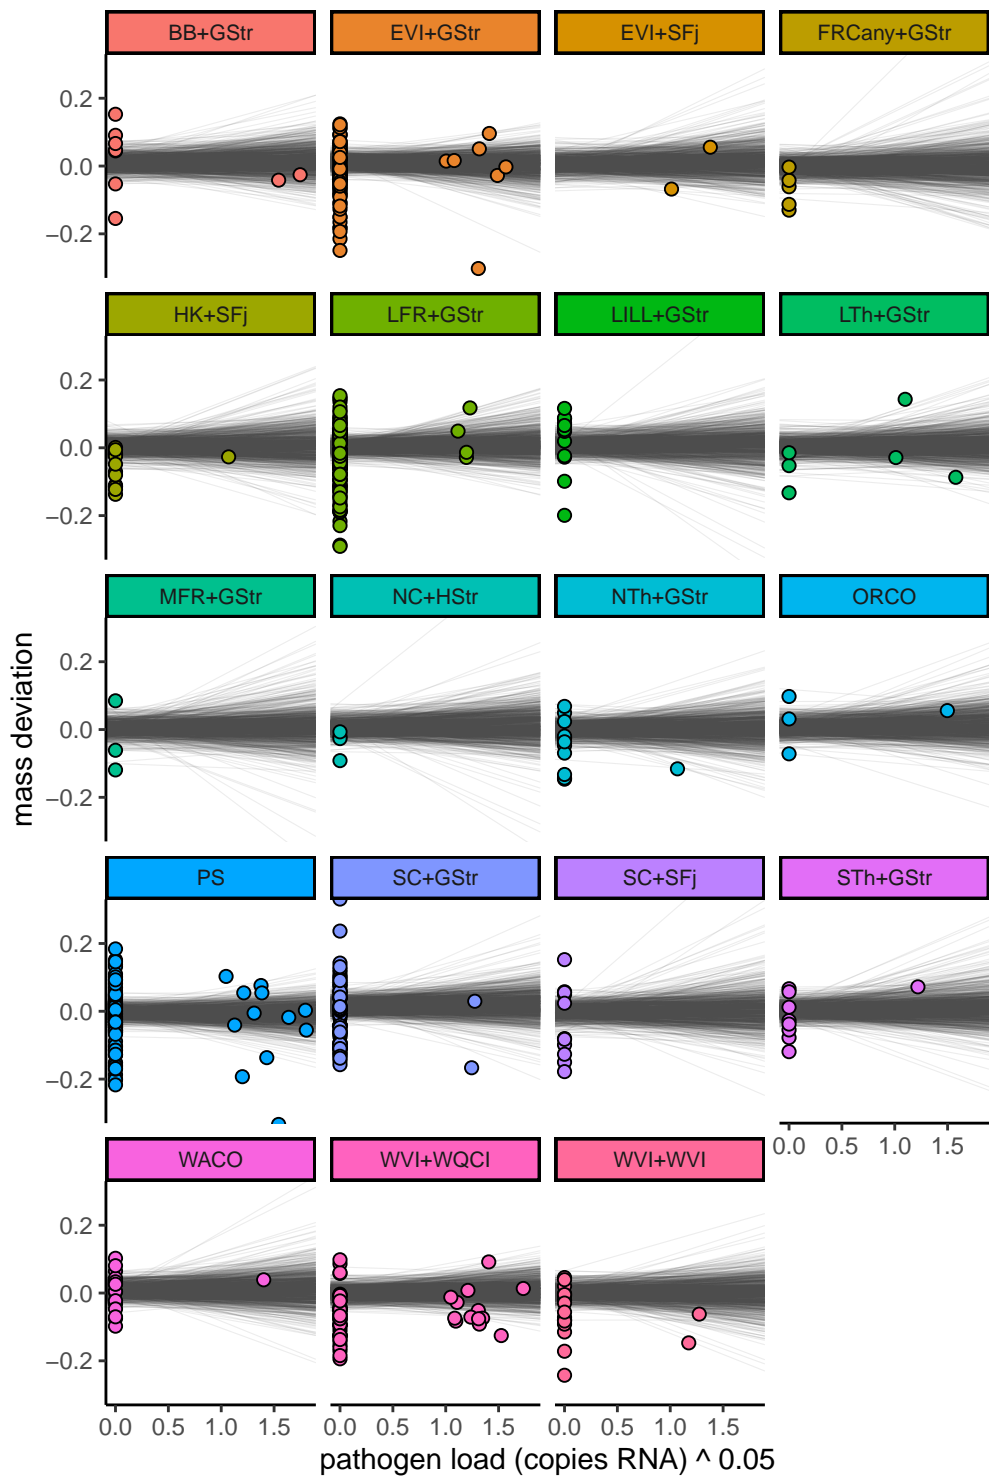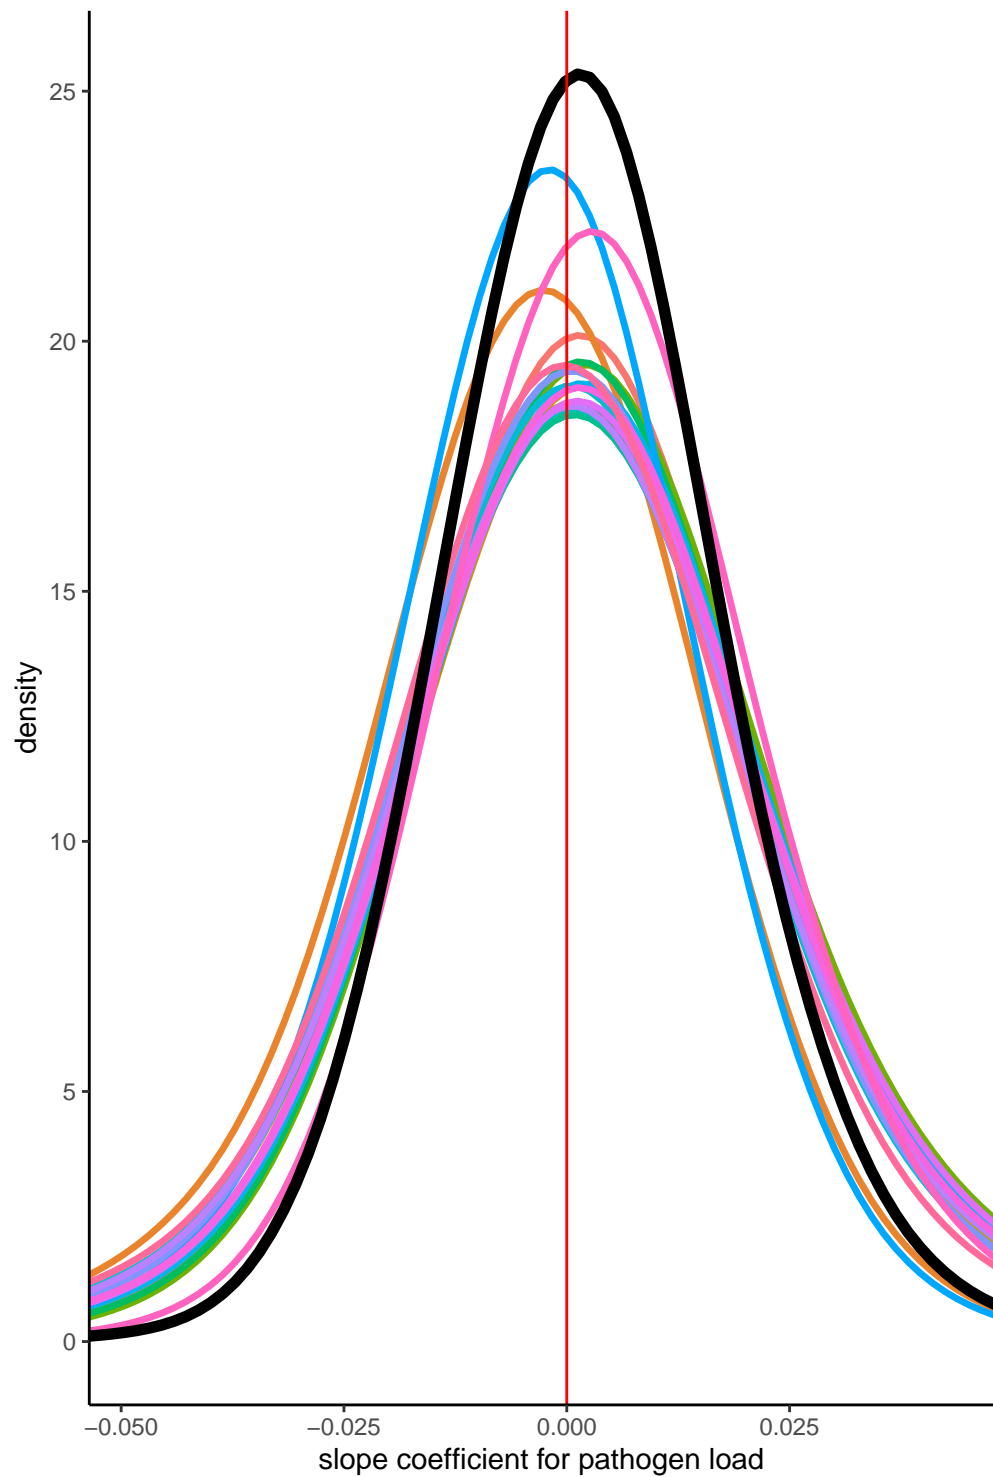

Tetracapsuloides bryosalmonae FaWi

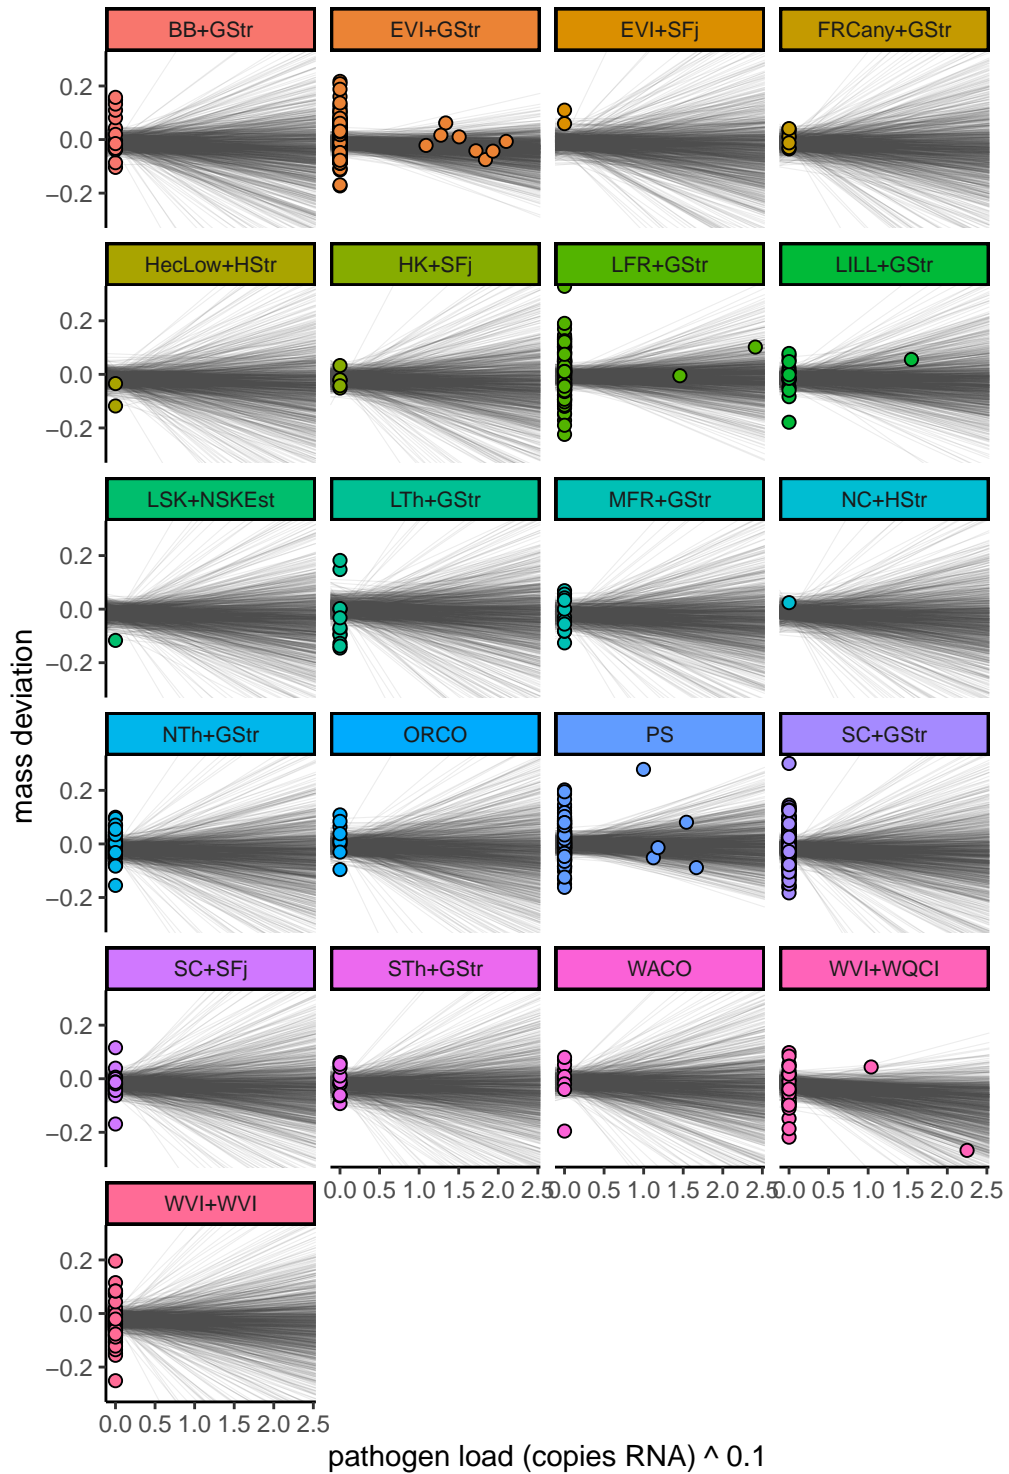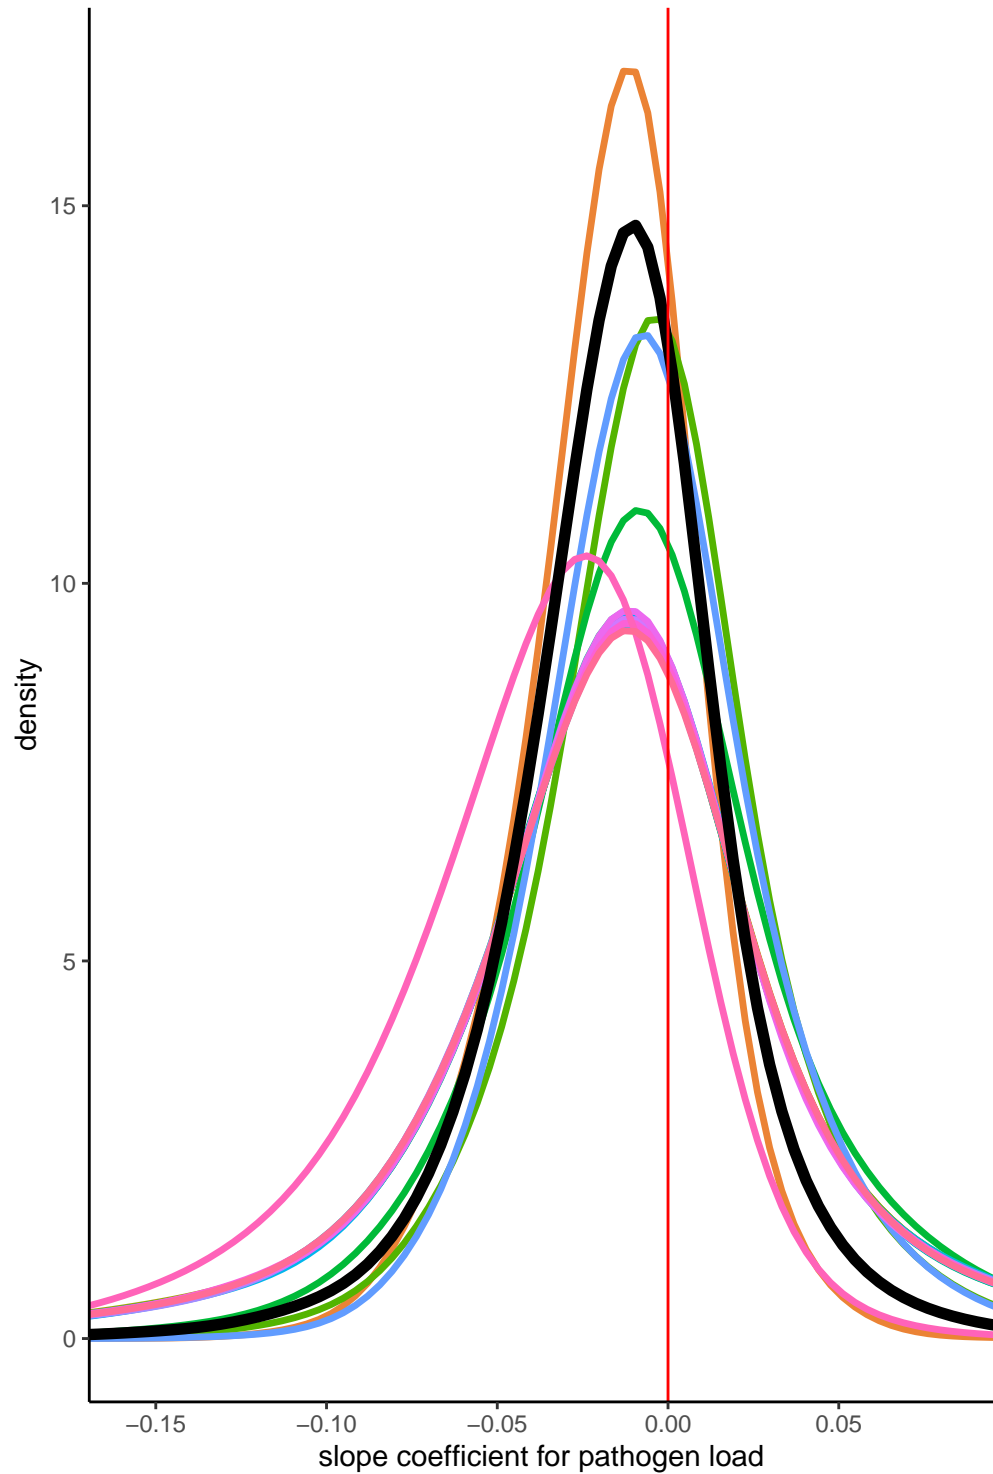



Tenacibaculum maritimum SpSu

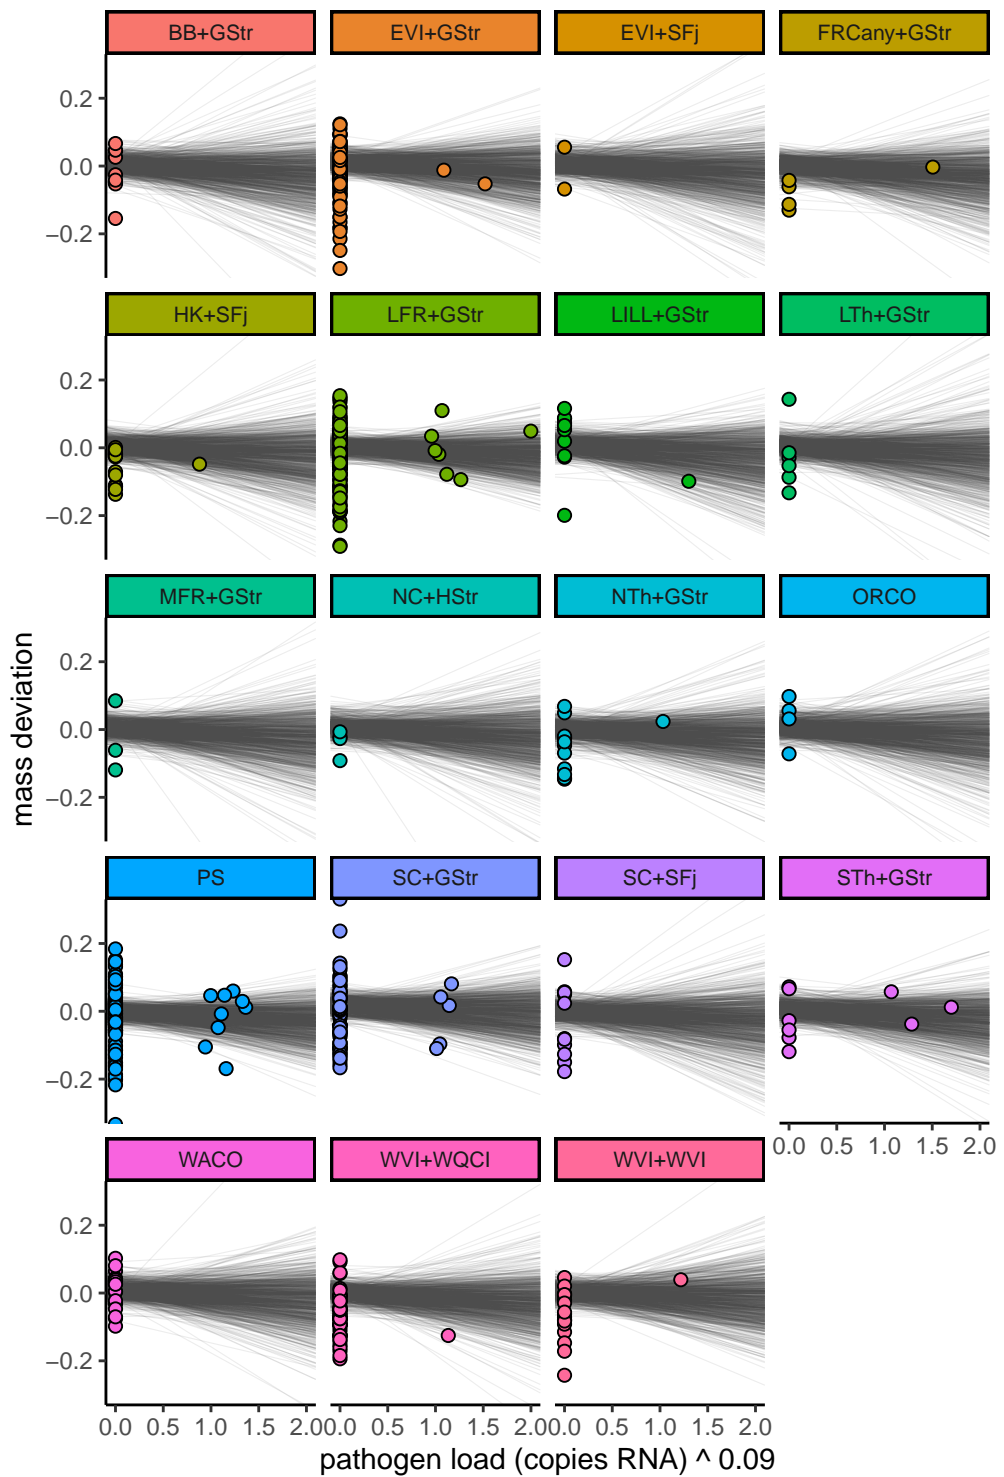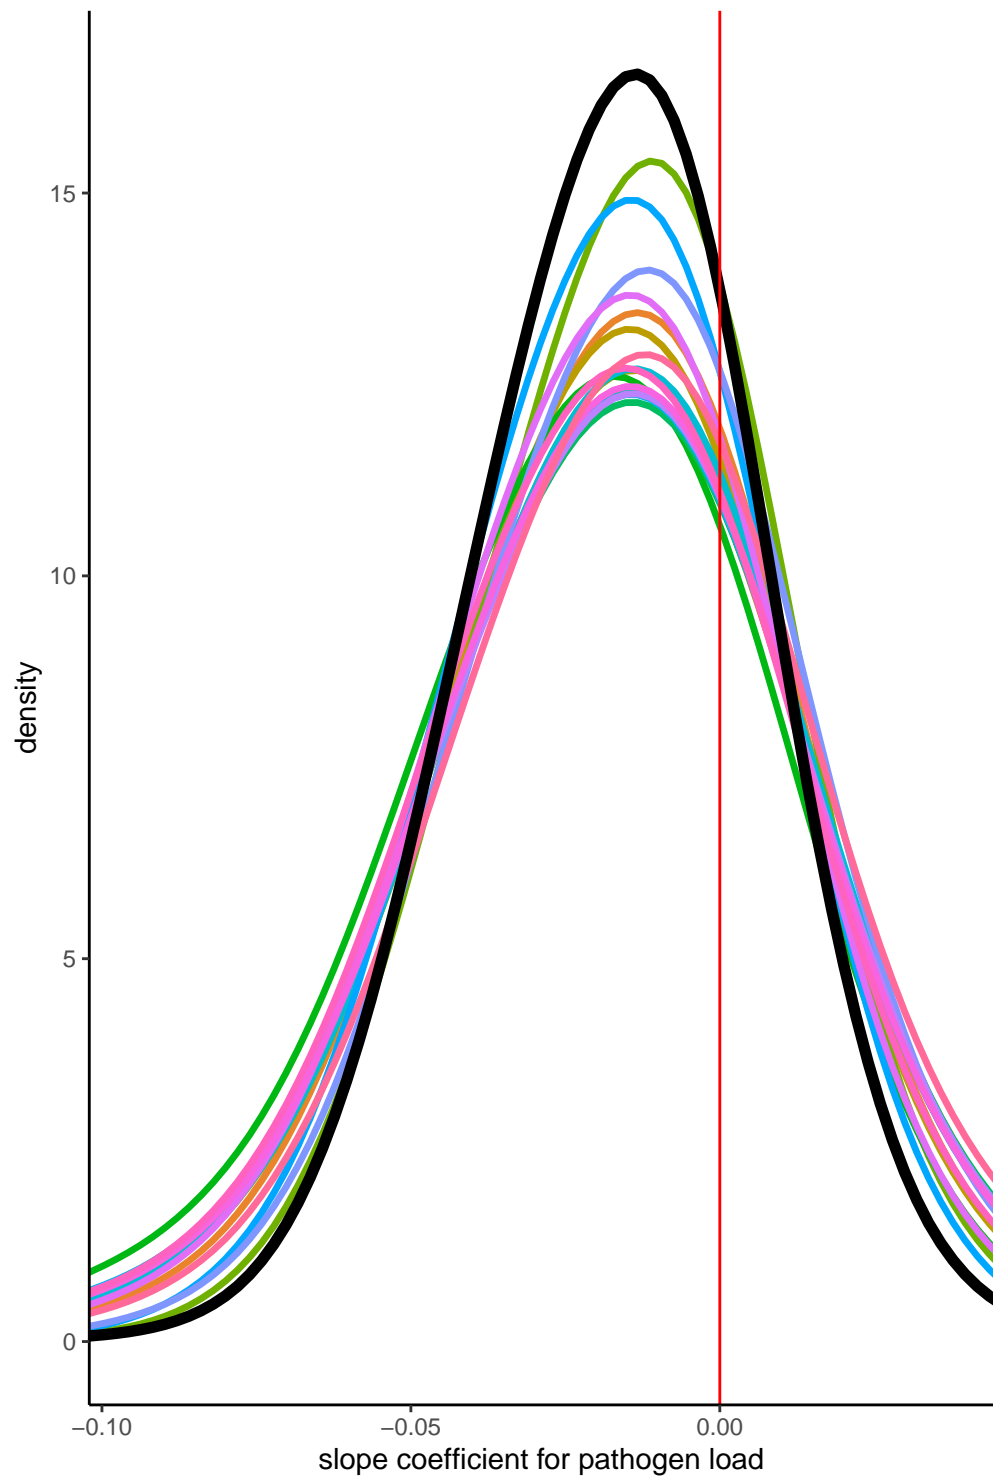

Tenacibaculum maritimum FaWi

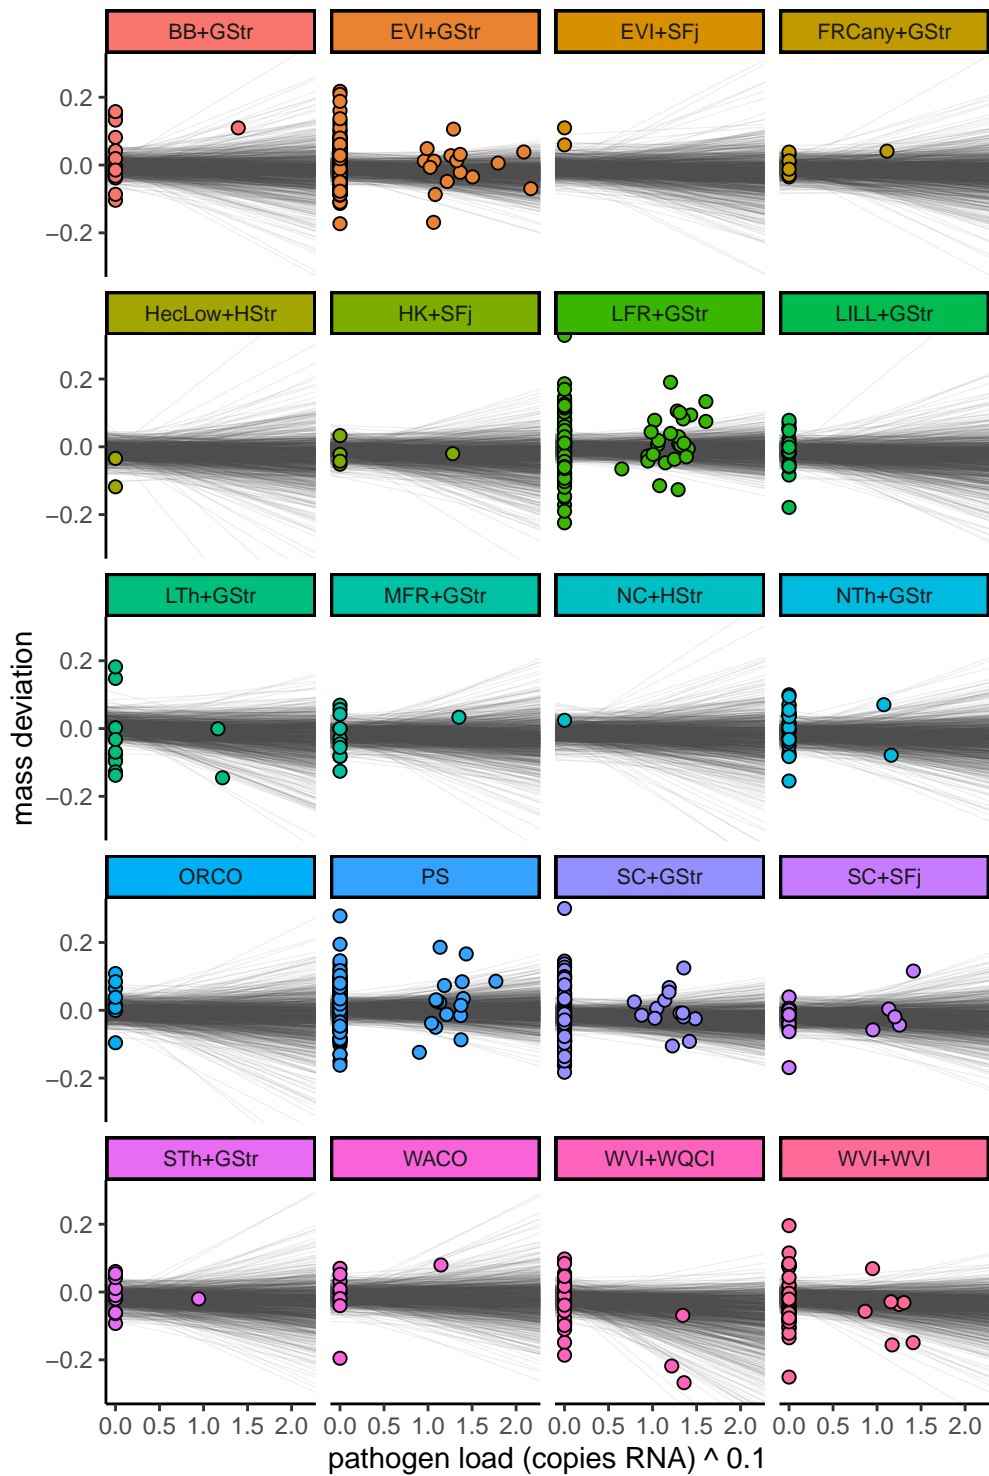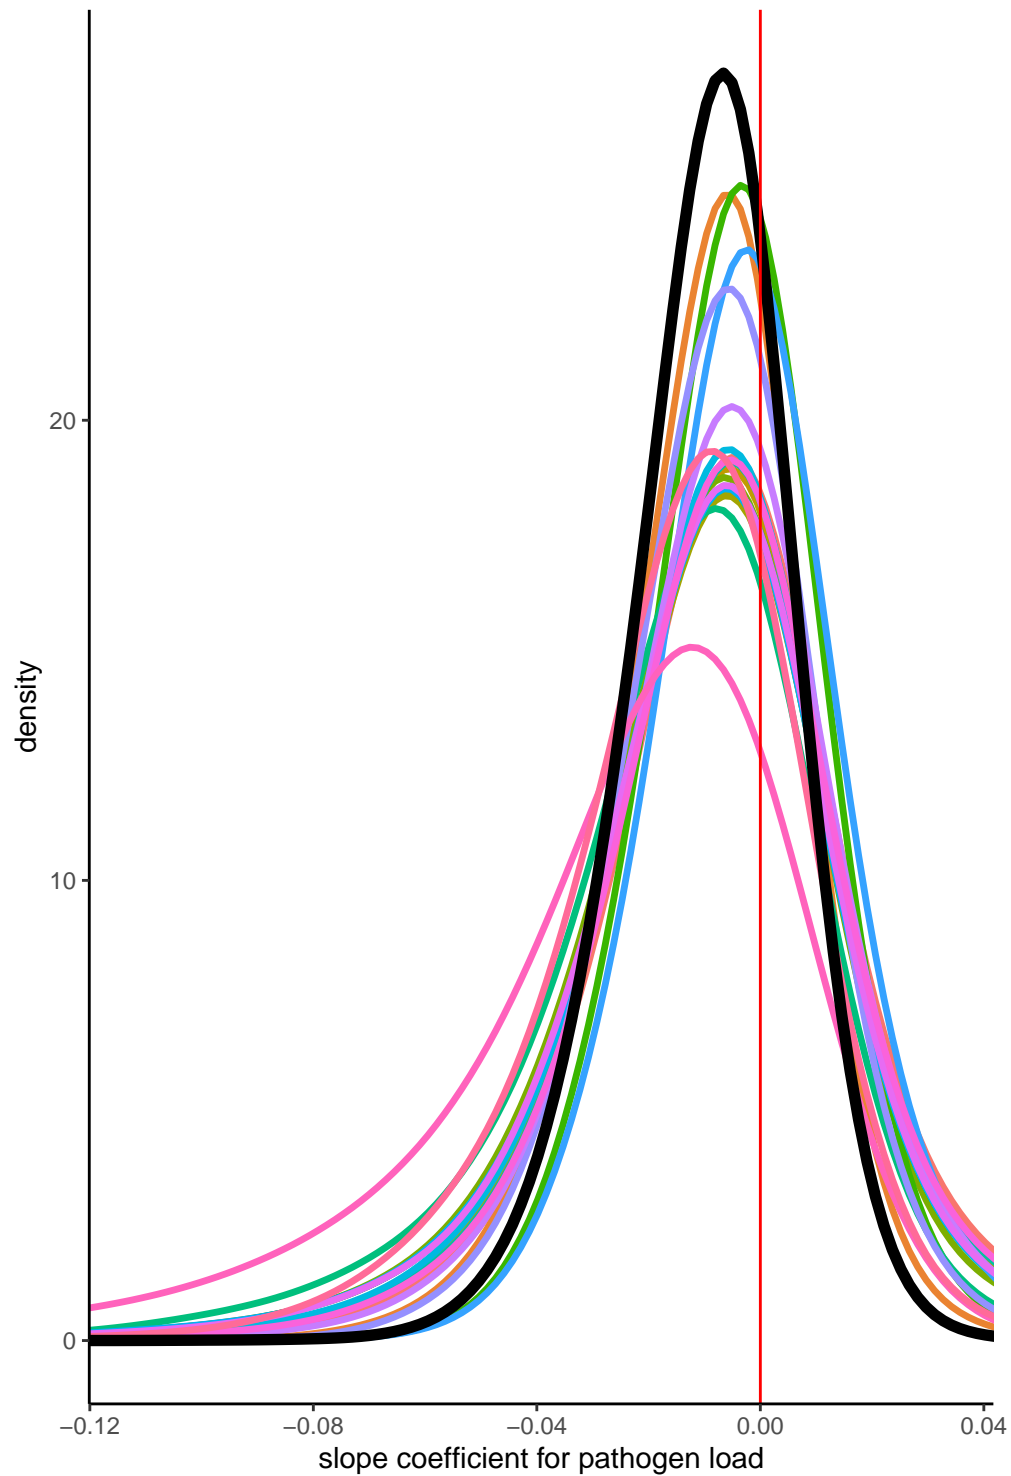

# Erythrocytic Necrosis Virus SpSu

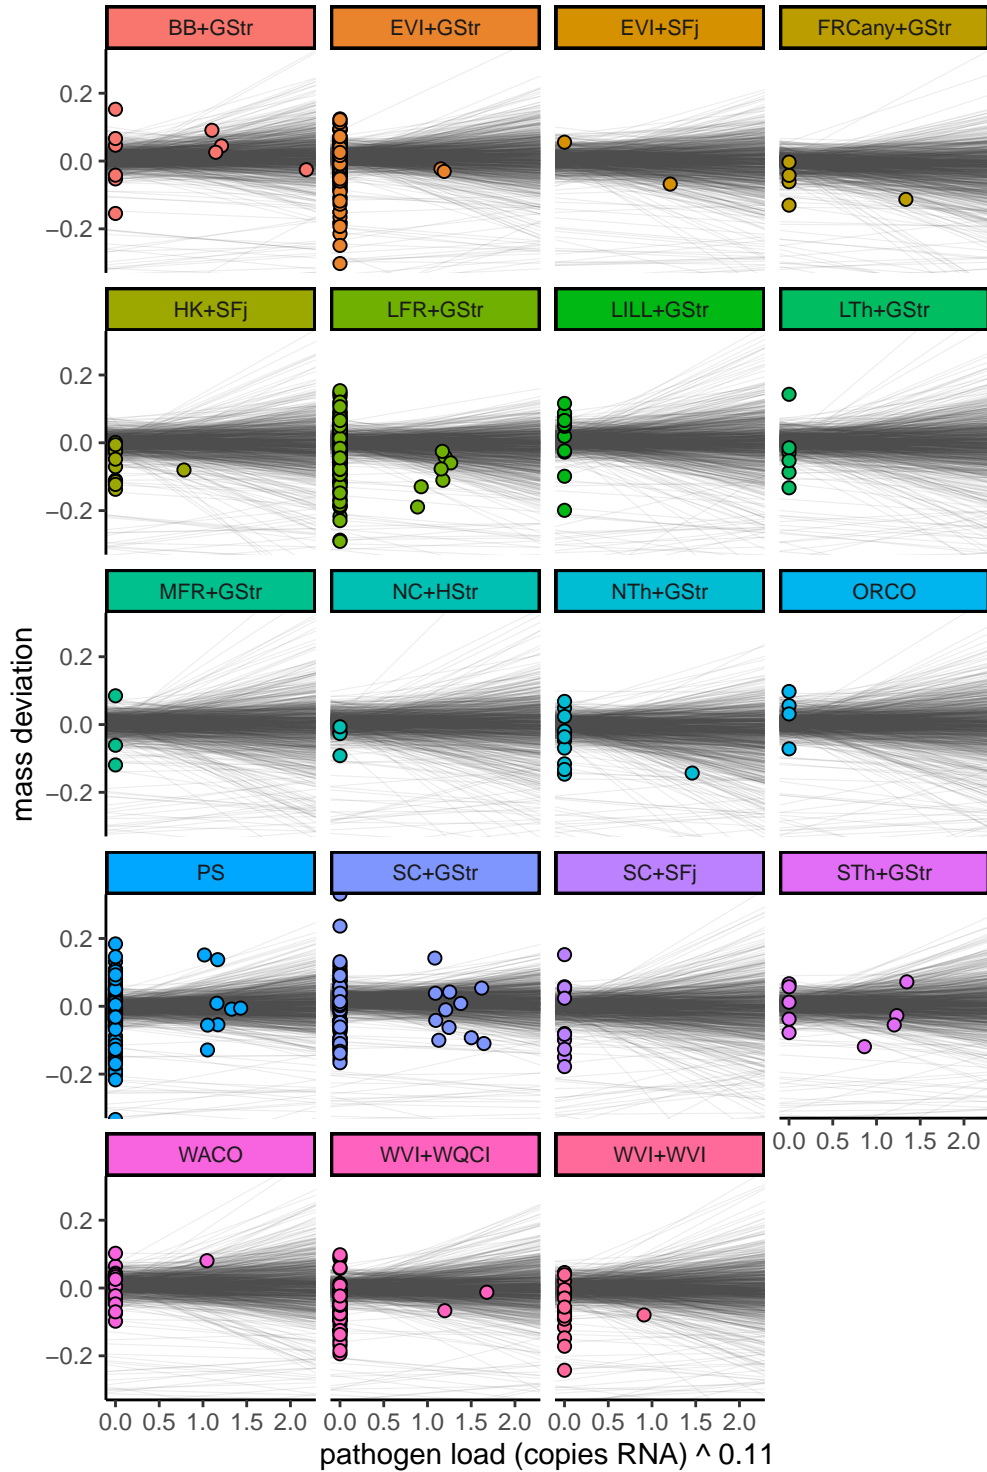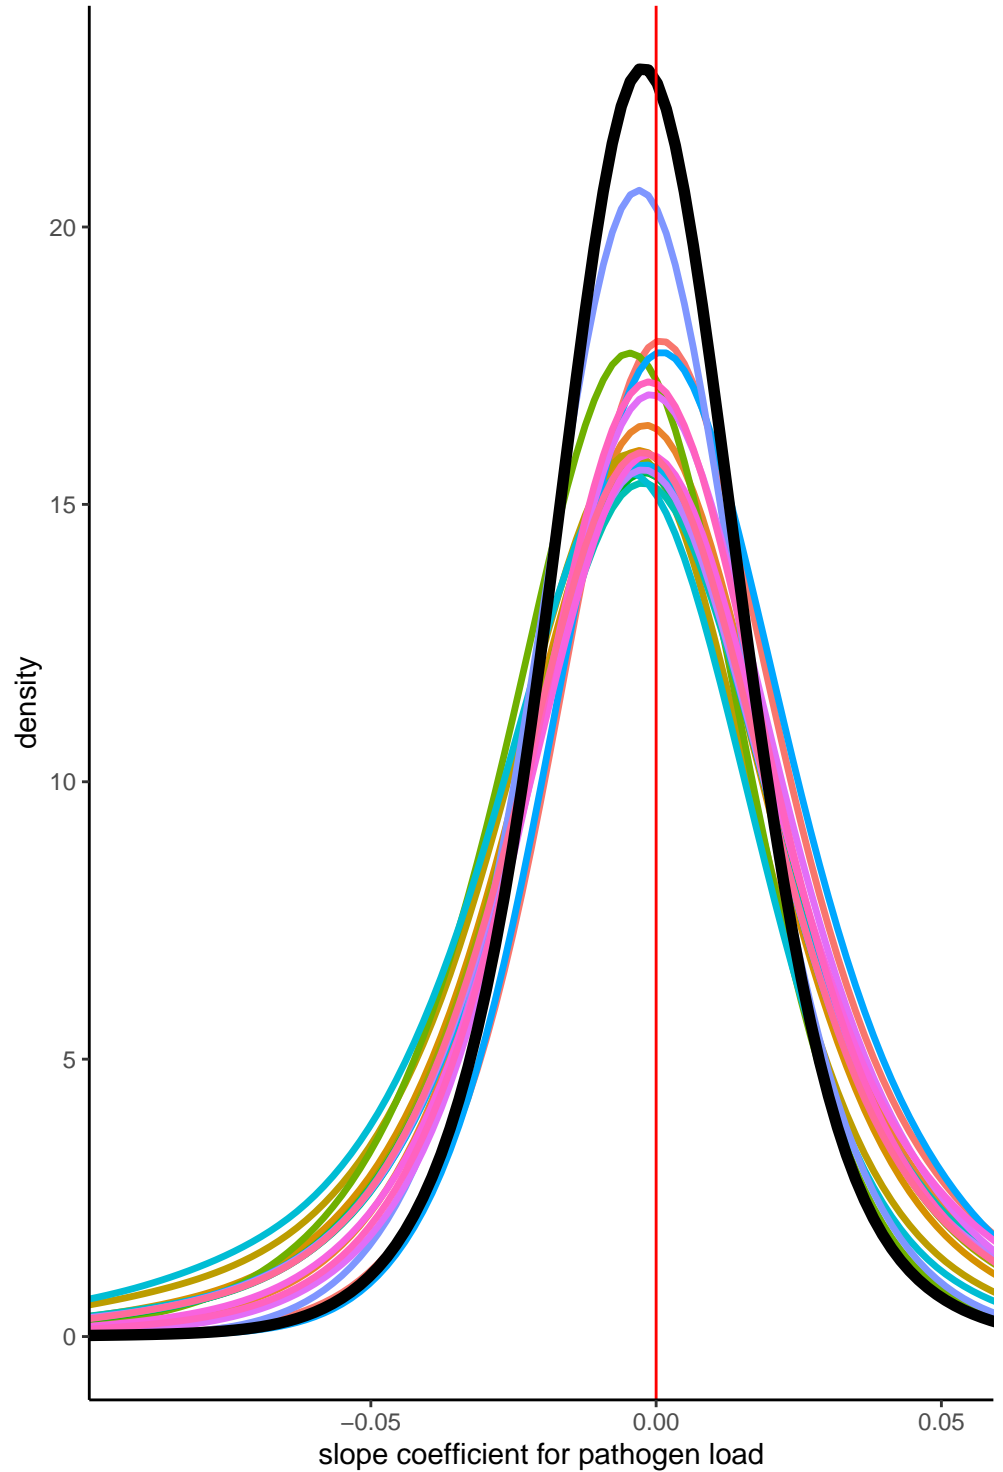

# Erythrocytic Necrosis Virus FaWi

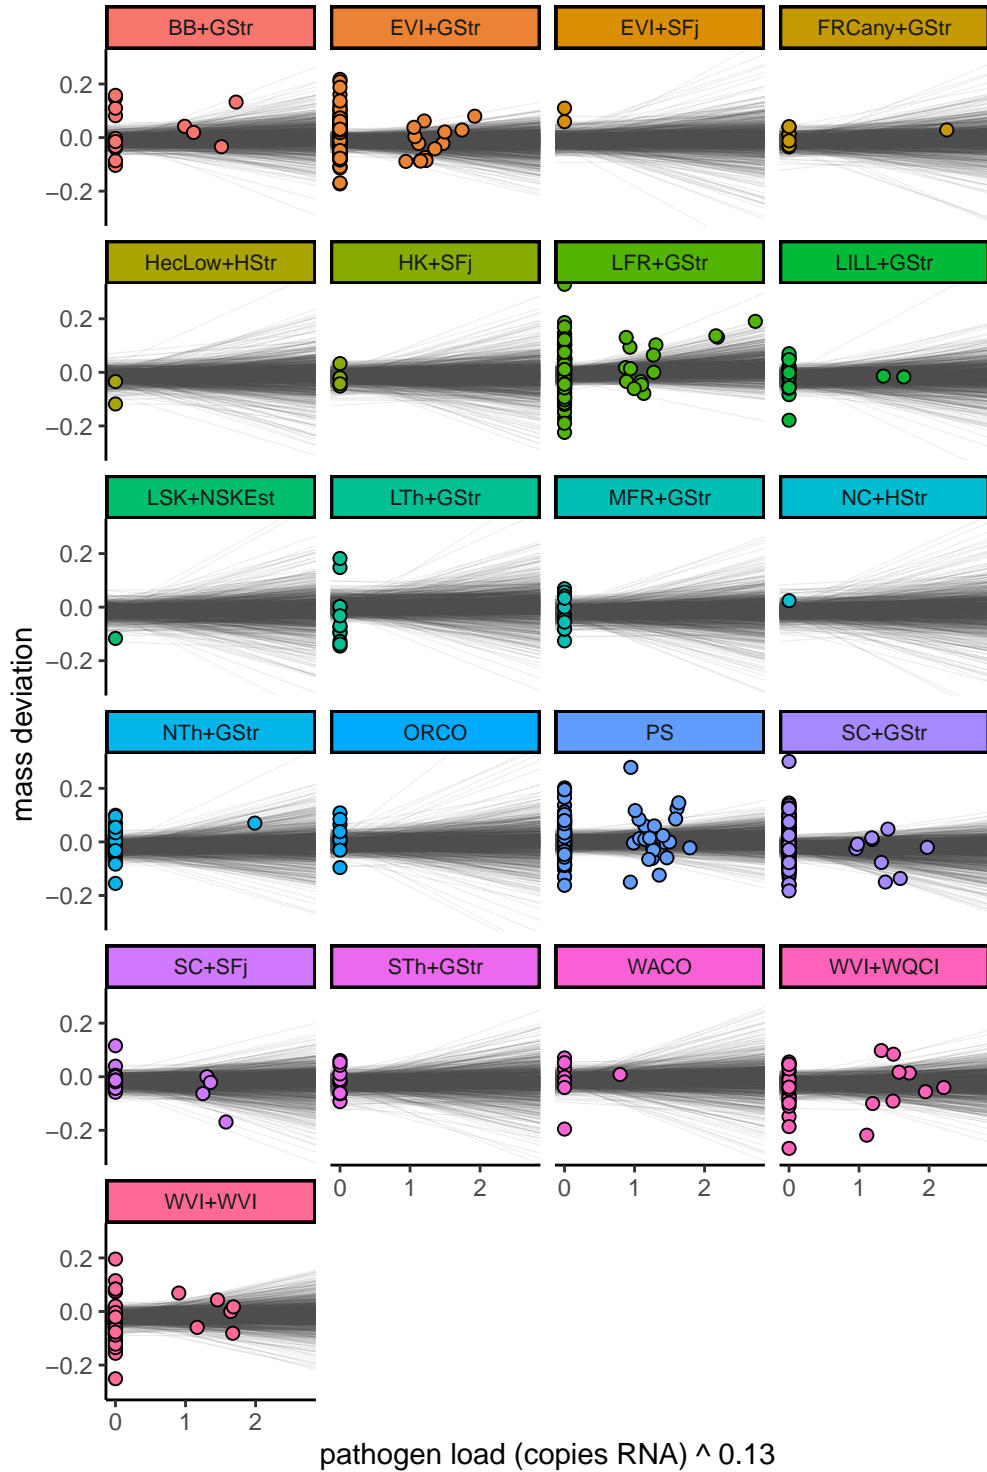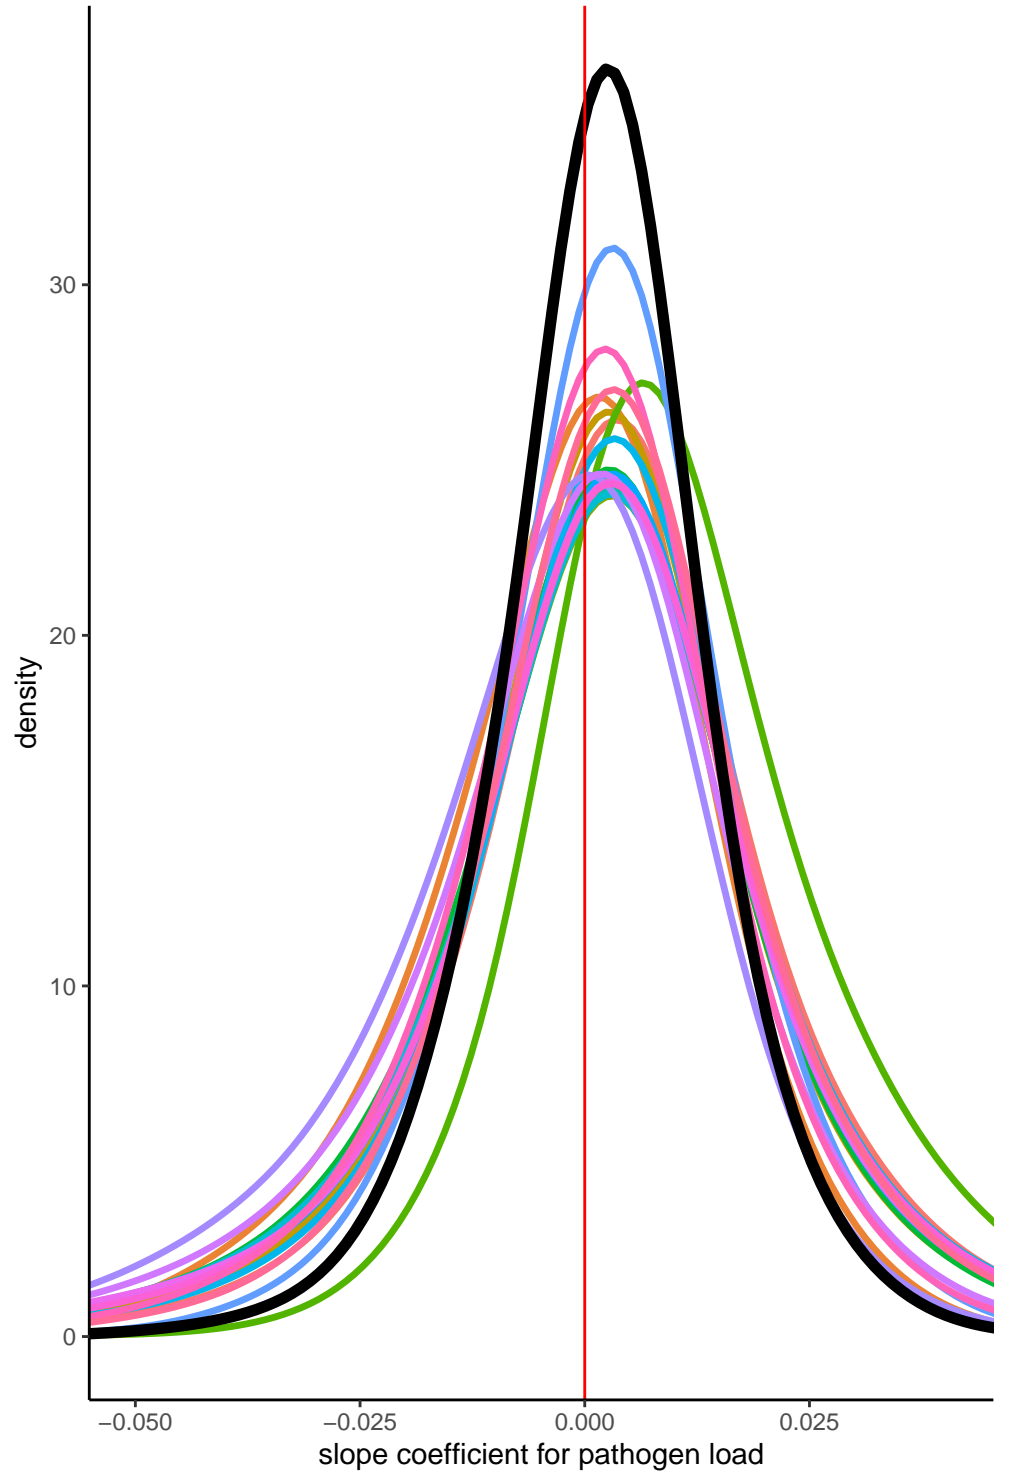

Total number of pathogen taxa SpSu

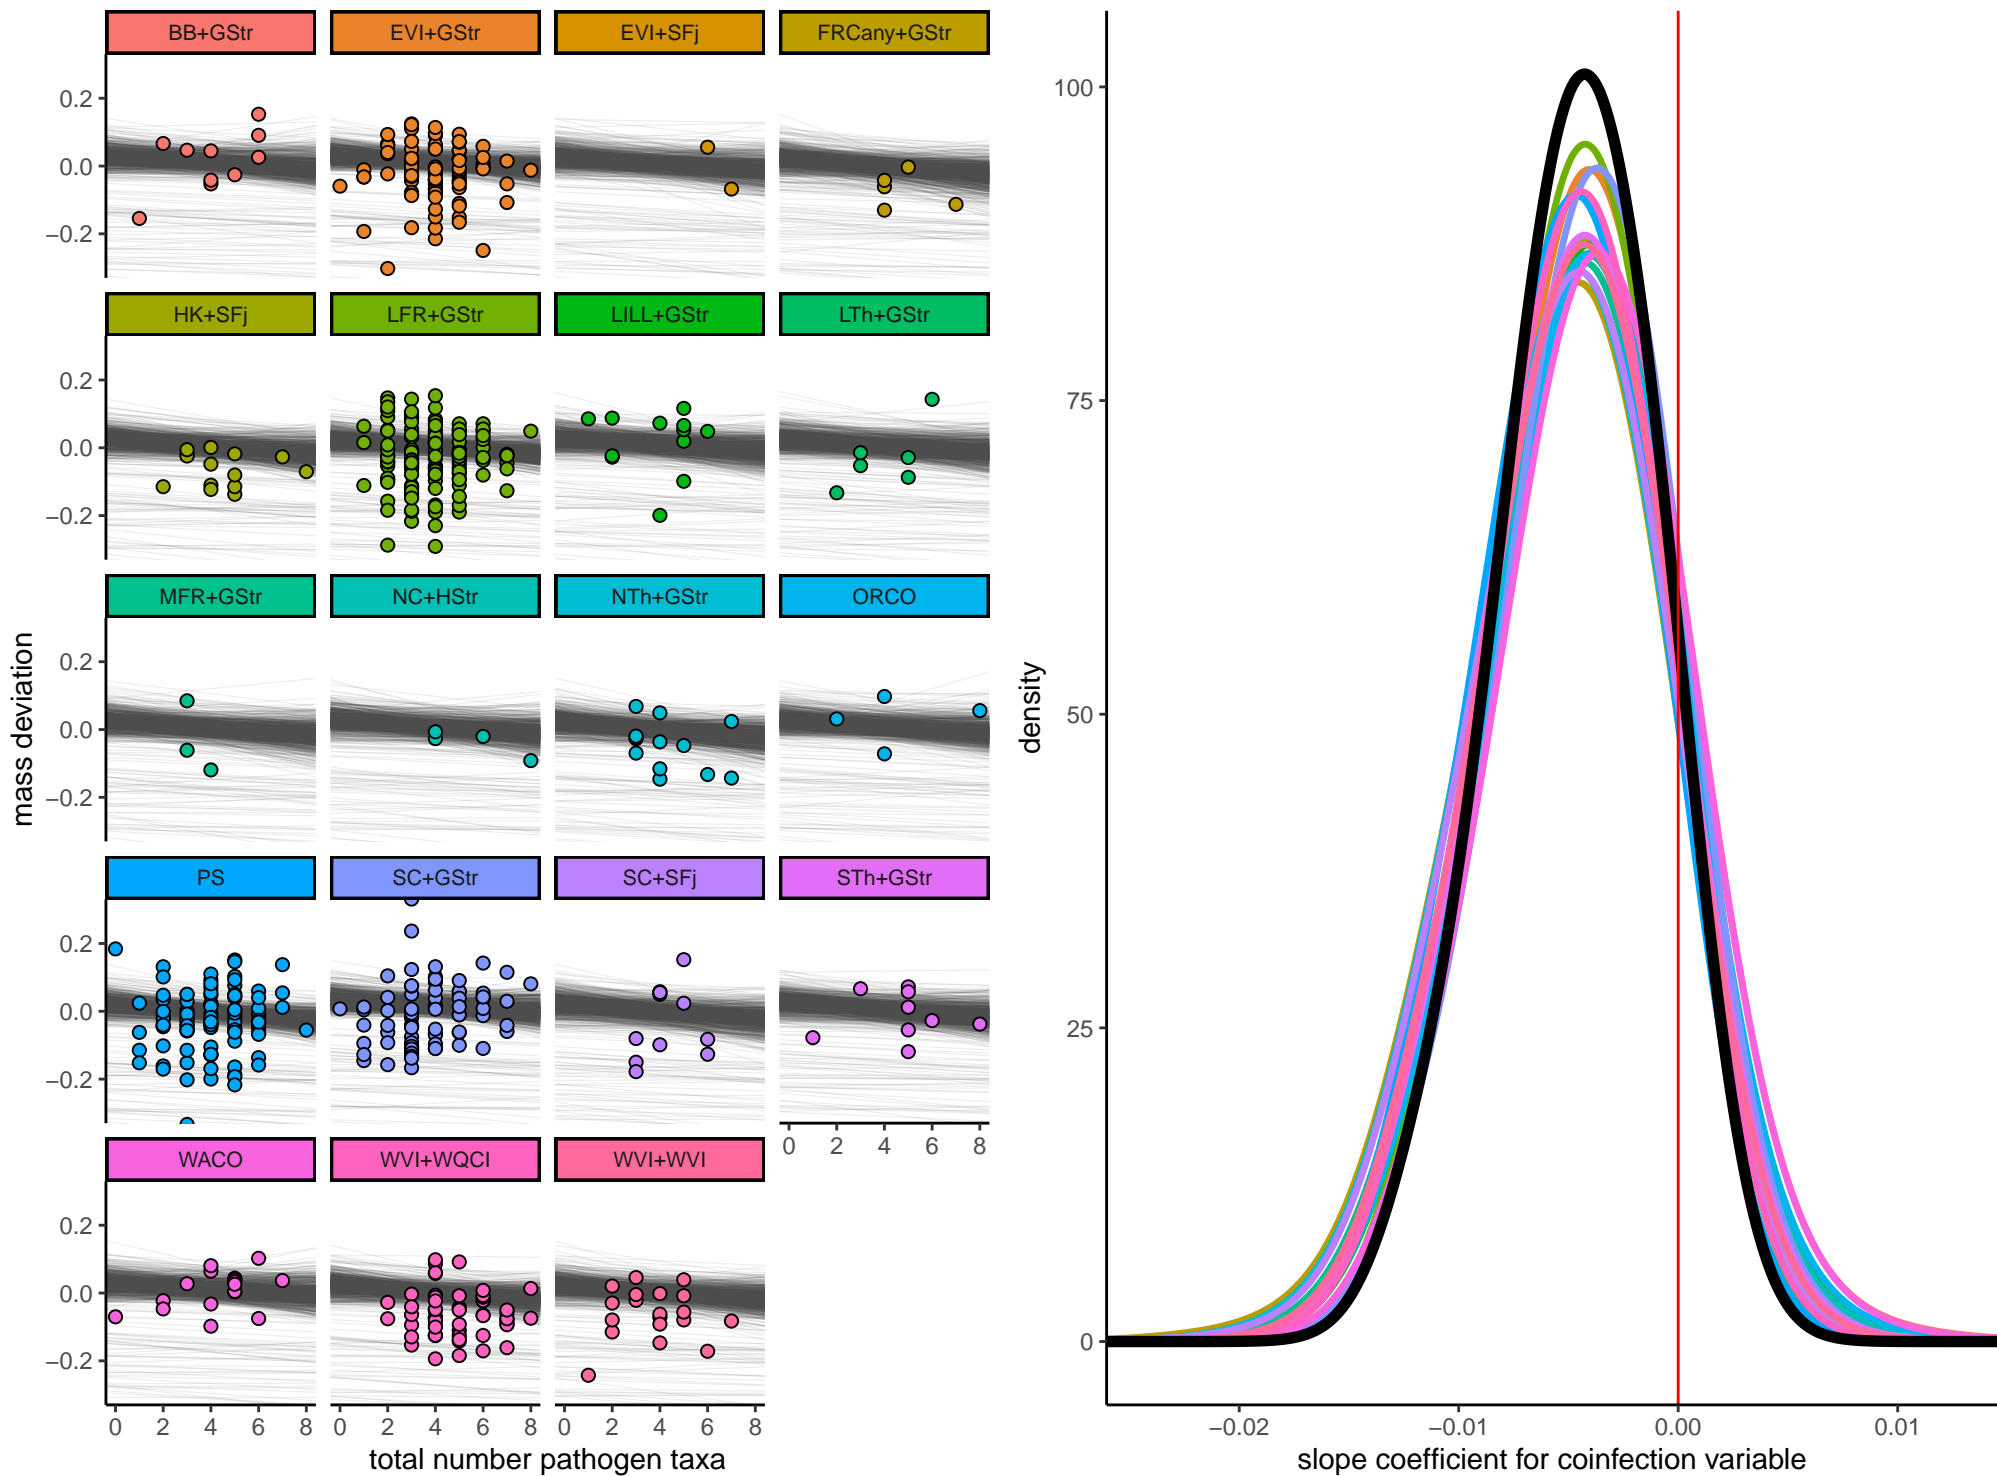

Total number of pathogen taxa FaWi

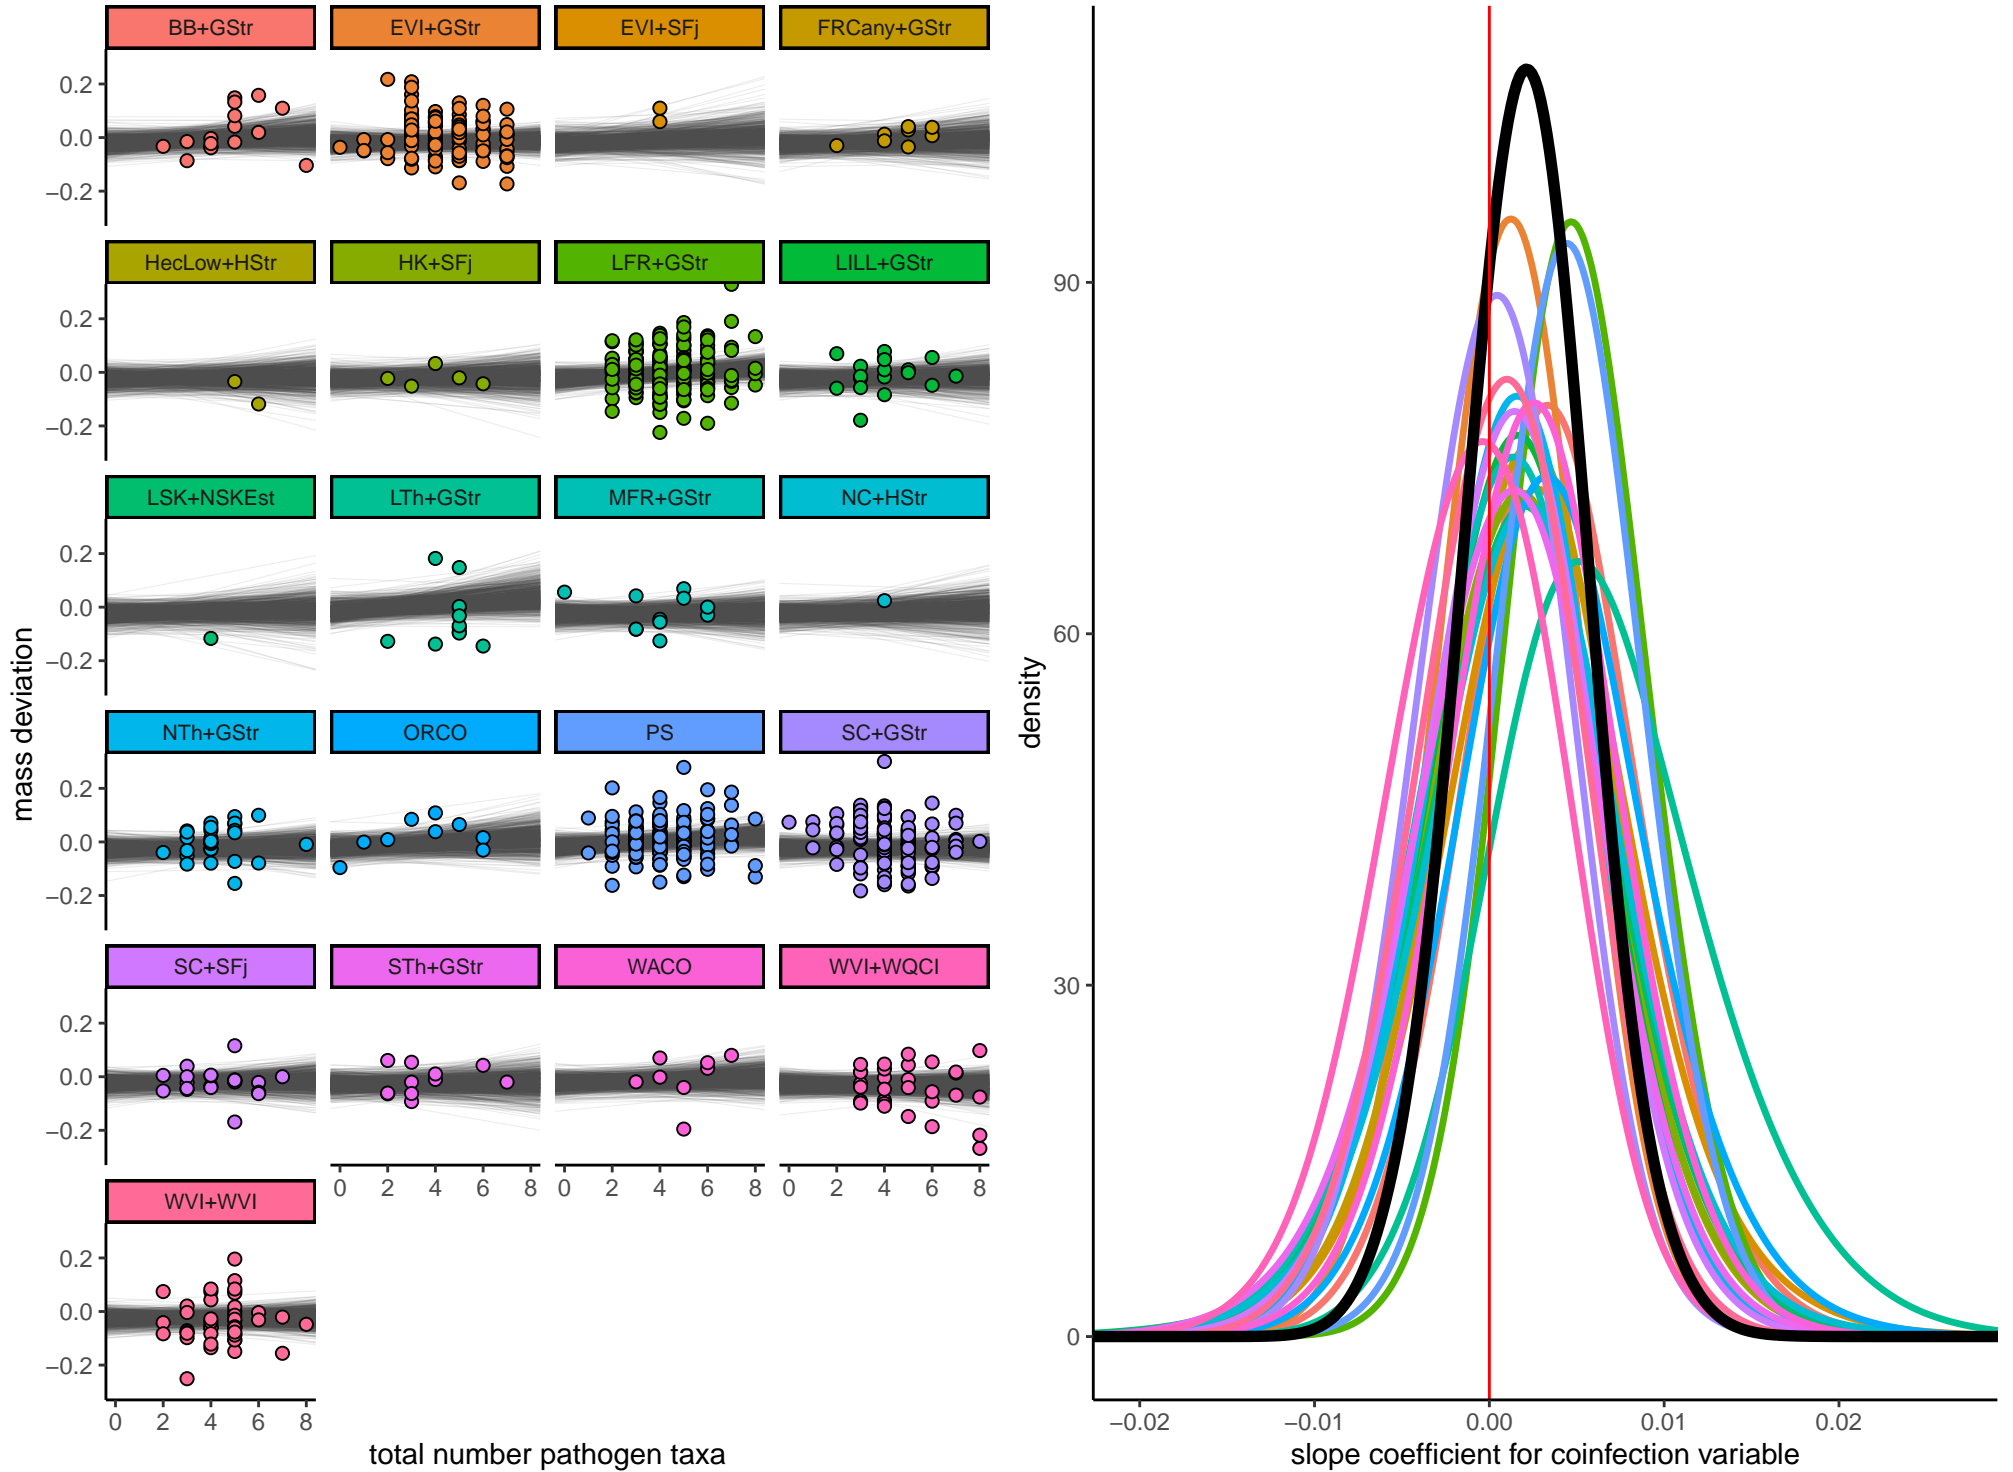

### Relative infectious agent burden SpSu

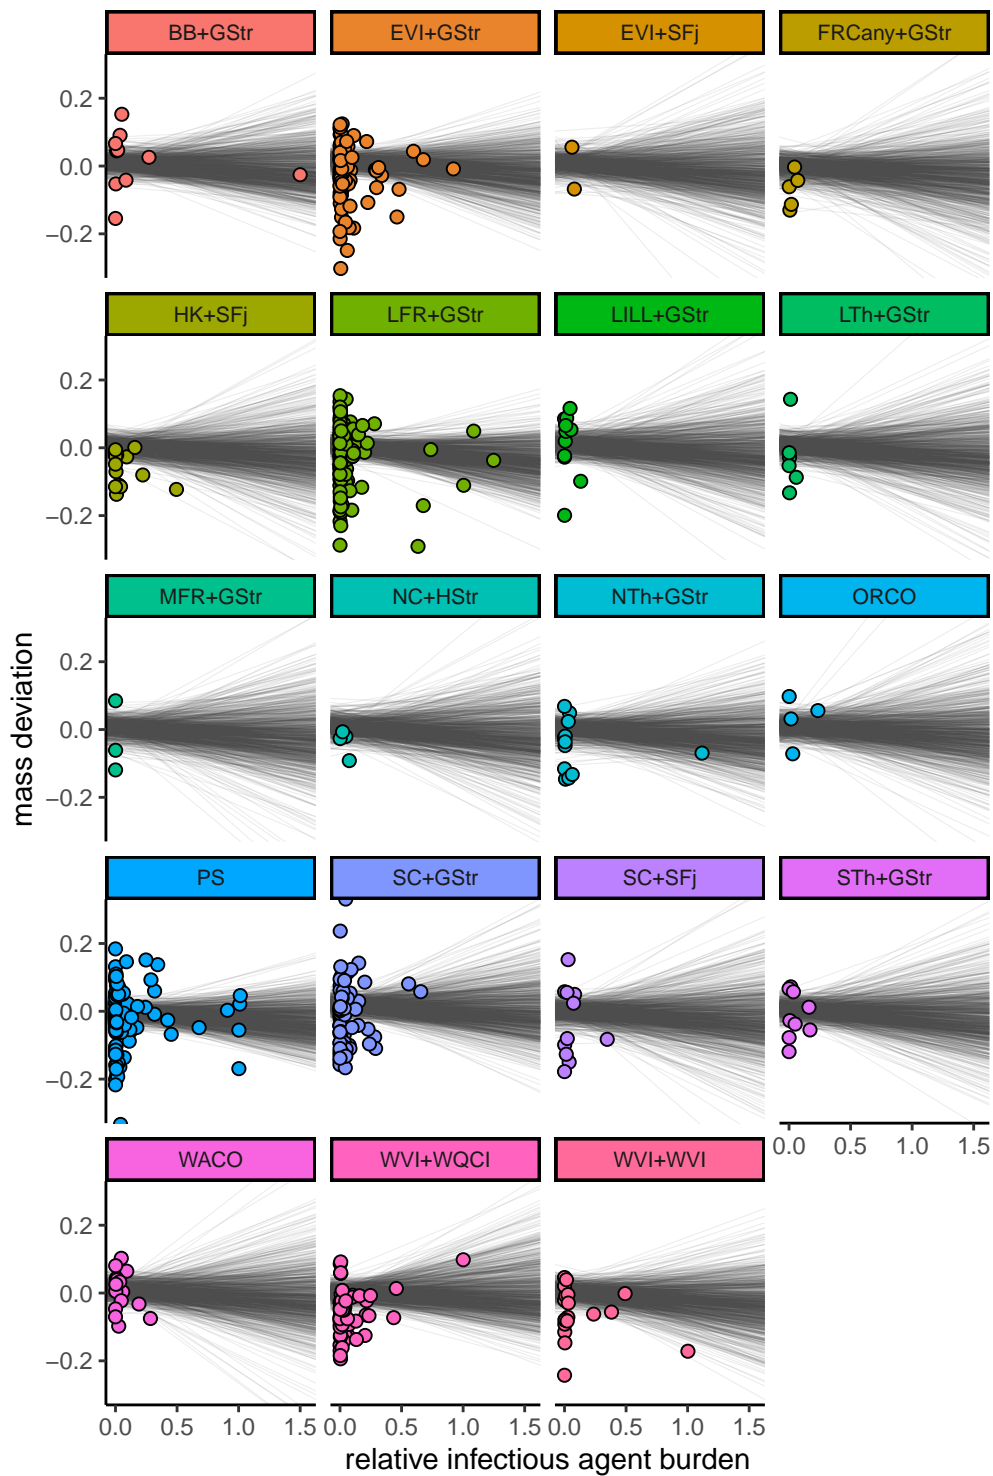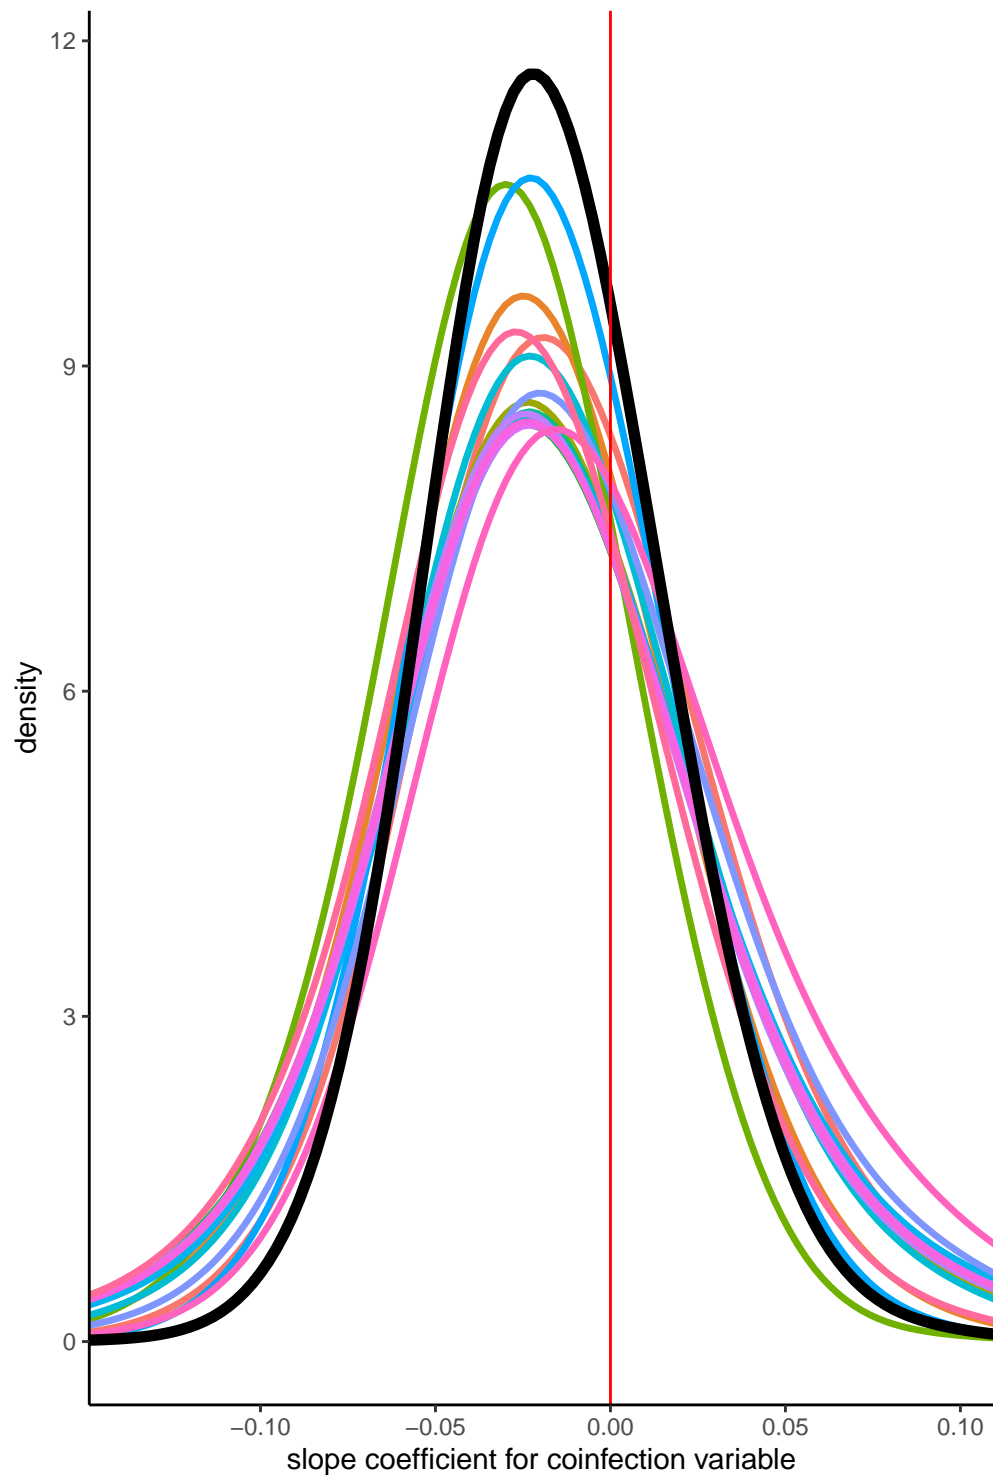

# Relative infectious agent burden FaWi

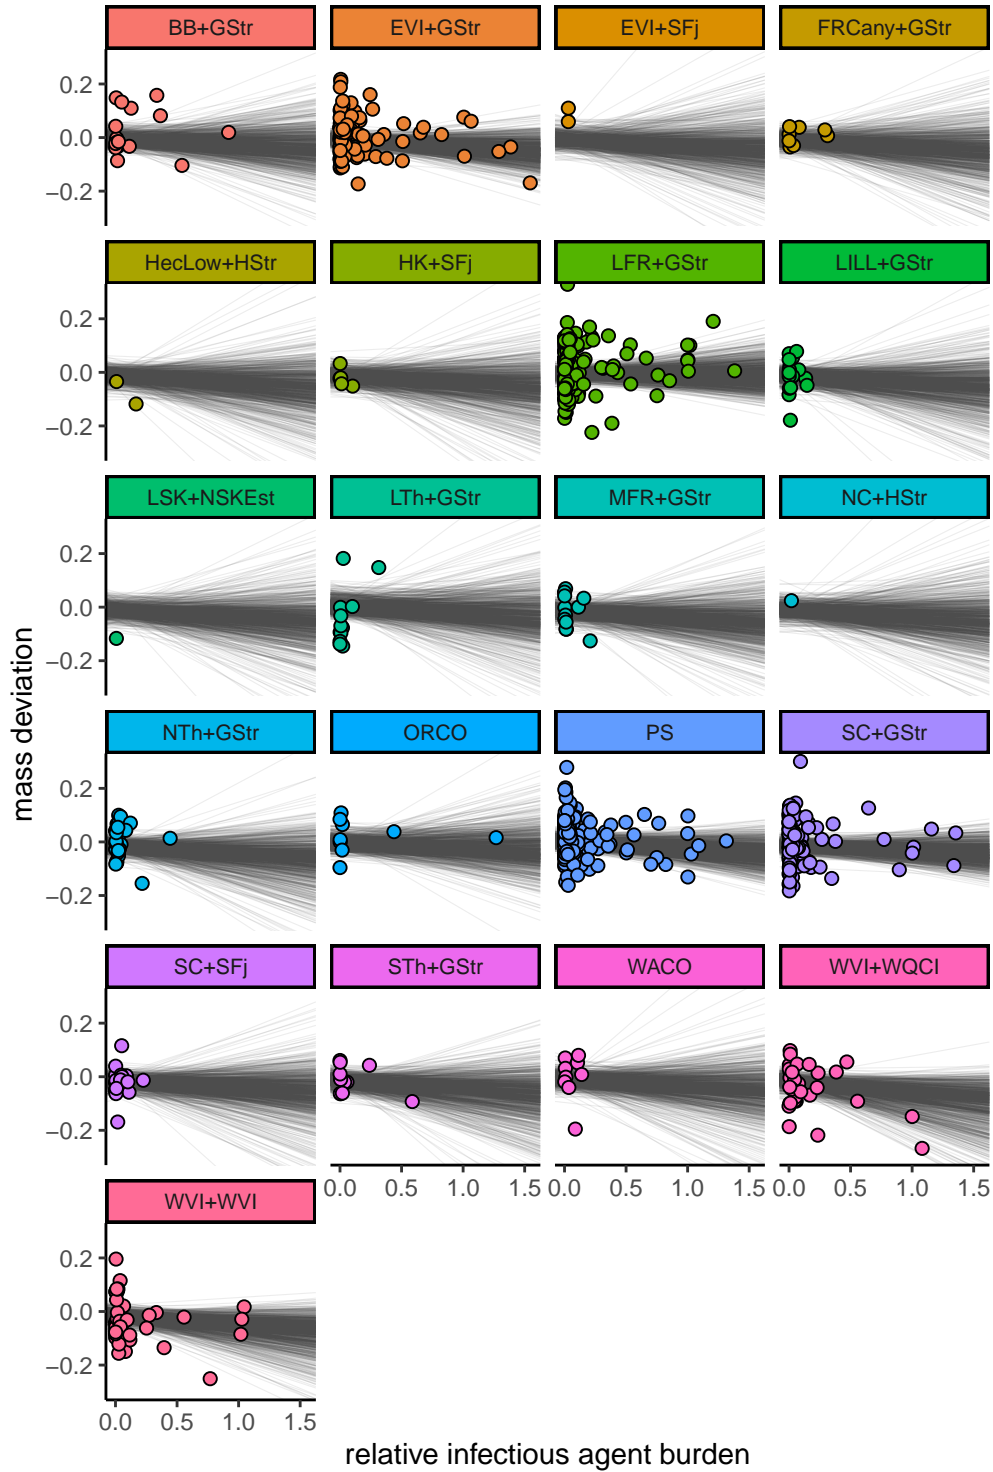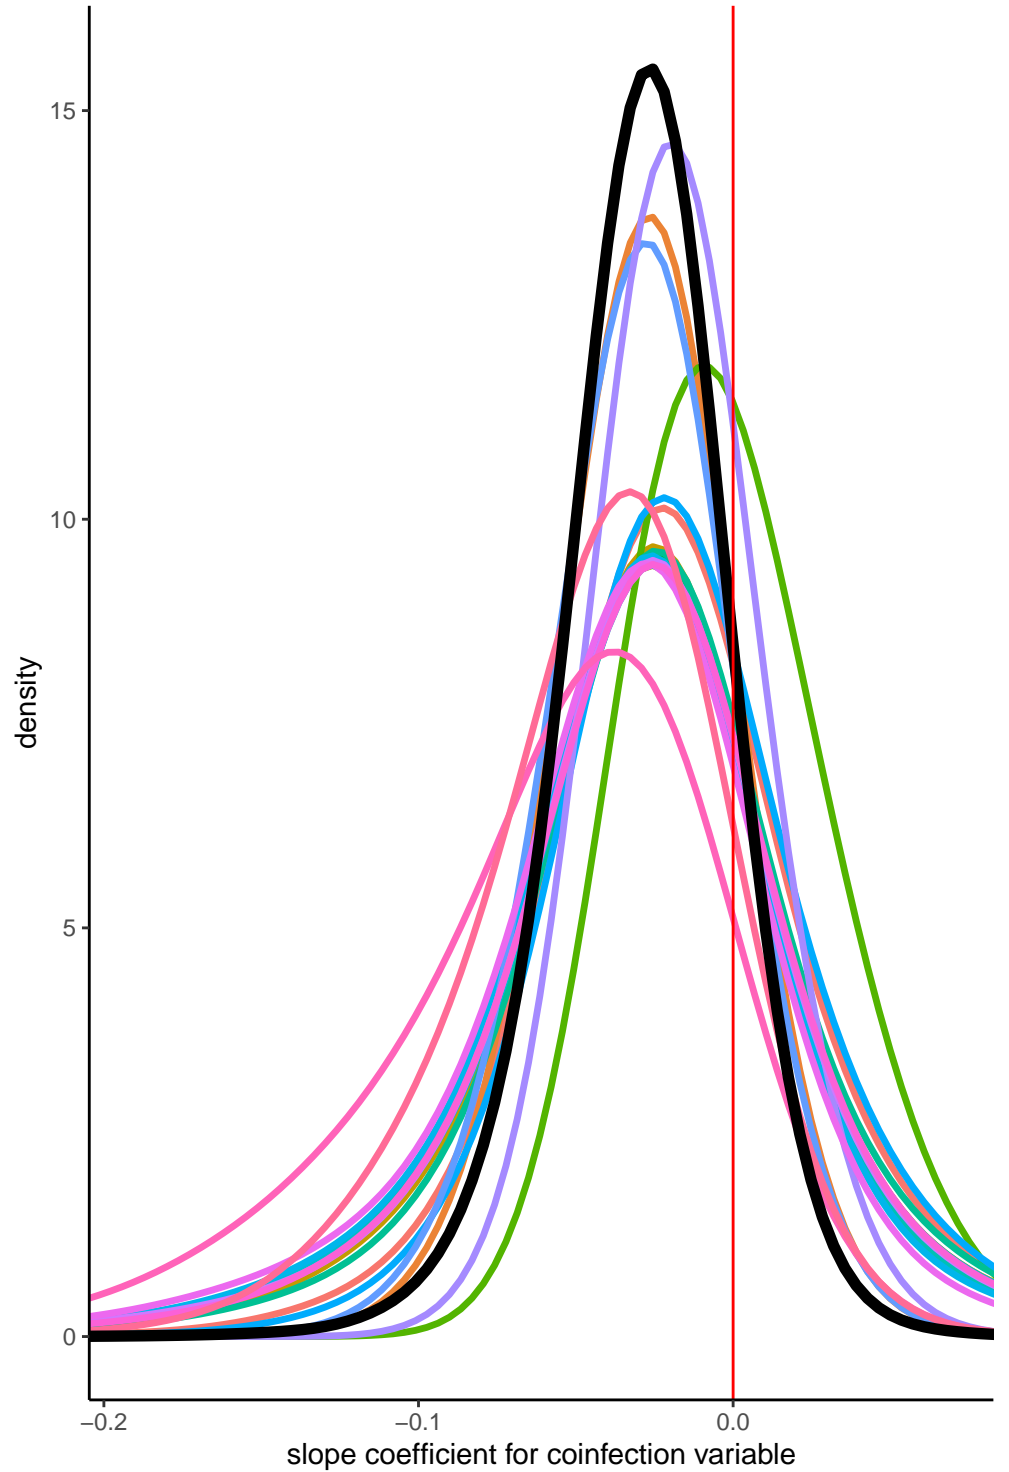

Supplement: facets-2021-0102_supplement5.pdf [file facets-2021-0102_supplement5.pdf]
