# Supplementary material for: Identification of infectious agents in early marine Chinook and Coho salmon associated with cohort survival
Source: Atypon-hosted journal article supplement (doi:10.1139/facets-2021-0102), 2022-01-01
Supplement: facets-2021-0102_supplement1.pdf [file facets-2021-0102_supplement1.pdf]

## **Supplementary Material 1**

### **"Identification of infectious agents in early marine Chinook and Coho salmon associated with cohort survival"**

Arthur L. Bass, Andrew W. Bateman, Brendan M. Connors, Benjamin A. Staton, Eric B. Rondeau, Gideon J. Mordecai, Amy K. Teffer, Karia H. Kaukinen, Shaorong Li, Amy M. Tabata, David A. Patterson, Scott G. Hinch, Kristina M. Miller

#### **Detailed molecular methods**

Tissue samples were screened for the presence of 59 infectious agent taxa (Table 1), using HT-qPCR on the Fluidigm Biomark Dynamic Array™ microfluidics platform (Fluidigm, San Francisco, CA, USA) at the Pacific Biological Station, Nanaimo, British Columbia, Canada. This platform has recently been analytically validated for quantitative infectious agent profiling in salmon tissue (Miller et al. 2016) and applied to multiple studies of Pacific salmon (Di Cicco et al. 2017; Miller et al. 2017; Thakur et al. 2018). Infectious agent taxa were chosen based on knowledge of their presence in Canada or evidence of their association with disease worldwide (Miller et al. 2016). Assays utilizing taqman probes (Table S1) were designed to target both RNA and DNA. Not all of the same assays were used over the course of the qPCR runs, as some new assays were developed (Mordecai et al. 2019) (107 dynamic arrays run over the course of four years).

Total RNA and DNA were extracted using methods previously described in (Miller et al. 2016; Thakur et al. 2018). Briefly, tissues were homogenized separately in TRI-reagent™ (Ambion Inc., Austin, TX, USA). Next, 1-bromo-3-chloropropane was added to the

homogenate, and equal volumes of both the aqueous phase (RNA) and the organic/interphase (DNA) from each tissue type were combined for extraction. RNA extractions were carried out using MagMAX<sup>TM</sup>-96 for Microarrays Total RNA Isolation Kits (Ambion Inc.) with a Biomek NXP<sup>TM</sup> automated liquid-handling instrument. RNA quantity and purity was assessed by measuring the A260/A280 ratio using a Beckman Coulter DTX 880 Multimode Spectrophotometer (Brea, CA, USA). DNA was extracted using the TNES-6U method following the Qiagen BioSprint protocol.

Normalized RNA (1 µg) was reverse transcribed to cDNA using the SuperScript VILO MasterMix Kit (Invitrogen, Carlsbad, CA) following the manufacturer's instructions. DNA and cDNA were then mixed in equal proportions. The assay volume used for qPCR on the BioMark is small (7 nL) and therefore a pre-amplification step is recommended by the manufacturer. Thus, 0.2 µmol/L of the cDNA/DNA mix from each sample was pre-amplified with primer pairs corresponding to all assays (microbes and 3 reference genes) in a 5 µL reaction volume using 1X TaqMan Preamp Master Mix (Applied Biosystems, Foster City, California) according to the BioMark protocol. Unincorporated primers were removed using ExoSAP-IT<sup>TM</sup> (Affymetrix, Santa Clara, California), and samples were diluted 1:5 in DNA Suspension Buffer (Teknova, Hollister, California).

Artificial positive constructs (APC clones) corresponding to all assays were run in six serial dilutions on the dynamic array to construct a standard curve and calculate efficiency for each assay and estimate RNA copy number for each positive sample. The APC clones contained an additional probe labelled with NED<sup>TM</sup> reporter dye (Life Technologies) that allowed for the detection of vector contamination (see Miller et al. 2016).

A 5 µL sample mix was prepared containing 1X TaqMan Universal Master-Mix (Life

Technologies), 1X GE Sample Loading Reagent (Fluidigm PN 85000746), and amplified cDNA/DNA, which was added to each assay inlet of the array following the manufacturer's recommendations. All assays were run in duplicate. Five  $\mu\text{L}$  of assay mix was prepared containing 10  $\mu\text{M}$  primers (infectious agent in FAM-MGB and APC in NED-MGB) and 3  $\mu\text{M}$  probes for the TaqMan assays. After loading the assays and samples into the chip using an IFC controller HX (Fluidigm), PCR was performed with the following conditions: 50°C for 2 min, 95°C for 10 min, followed by 40 cycles of 95°C for 15 s and 60°C for 1 min.

Cycle threshold was determined using the BioMark Real-Time PCR analysis software. Reaction curves for each positive sample-assay combination were visually evaluated for abnormal curve shapes, close correspondence between duplicates, and presence of APC contamination as indicated by NED positives. Using scripts created in R statistical software (R Core Team 2019), we calculated efficiency for each assay (standard curve method (Larionov et al. 2005)), omitted results where only one duplicate was positive for a sample-assay combination, removed NED positive samples, and averaged duplicates. Limit of detection (LOD) is defined as the estimated cycle threshold (Ct) number under which true positive results are expected 95% of the time for a given assay (Miller et al. 2016). Because LOD was established for maximum compliance with OIE standards but limits the sensitivity of the BioMark to detect low-level infection, we present data exceeding the LOD. Note that we only included detections beyond the LOD for infectious agents that were also detected within the LOD whereas infectious agents only detected beyond the LOD were considered to be false positives.

## Supplementary Tables

Table S1: Taqman assays run for 59 infectious agents and 3 host reference genes in Chinook salmon mixed-tissue samples (2008 - 2018) using the Fluidigm Biomark HT-qRT-PCR platform (DFO Pacific Biological Station, Nanaimo, BC). Below the limit of detection Ct value, positive samples are detected 95% of the time.

| Scientific Name                           | abbreviation | Limit of Detection (Ct) | Forward Primer Sequence (5'-3') | Reverse Primer Sequence (5'-3') | Probe Sequence (FAM-5'-3'-MGB) |
|-------------------------------------------|--------------|-------------------------|---------------------------------|---------------------------------|--------------------------------|
| <i>Aeromonas hydrophila</i>               | ae_hyd       | 28.7                    | ACCGCTGCTCATTACTCTGATG          | CCAACCCAGACGGGAAGAA             | TGATGGTGAGCTGGTTG              |
| <i>Aeromonas salmonicida</i>              | ae_sal       | 25.6                    | TAAAGCACTGTCTGTACC              | GCTACTTCACCCTGATGG              | ACATCAGCAGGCTTCAGAGTCACTG      |
| <i>Candidatus Branchiomonas cysticola</i> | c_b_cys      | 25.7                    | AATACATCGGAACGTGTCTAGTG         | GCCATCAGCCGCTCATGTG             | CTCGGTCCCAGGCTTTCCTCTCCCA      |
| <i>Flavobacterium psychrophilum</i>       | fl_psy       | 29.5                    | GATCCTTATTCTCACAGTACC           | TGTAAACTGCTTTTGCCACAG           | AAACTCGGTGCTGACC               |
|                                           |              |                         | GTCAA                           | GAA                             |                                |
| <i>Moritella viscosa</i>                  | mo_vis       |                         | CGTTGCGAATGCAGAGGT              | AGGCATTGCTTGCTGGTTA             | TGCAGGCAAGCCAACCTTCGACA        |
| <i>Candidatus Piscichlamydia salmonis</i> | pch_sal      | 23.3                    | TCACCCAGGCTGCTT                 | GAATTCCATTTCCCCTCTTG            | CAAACTGCTAGACTAGAGT            |
| <i>Piscirickettsia salmonis</i>           | pisck_sal    | 23.3                    | TCTGGGAAGTGTGGCGATAGA           | TCCCGACCTACTCTTGTTTCATC         | TGATAGCCCCGTACACGAAACGGCATA    |
| <i>Renibacterium salmoninarum</i>         | re_sal       | 25.9                    | CAACAGGGTGGTTATTCTGC            | CTATAAGAGCCACCAGCTGCAA          | CTCCAGCGCCGCAGGAGGAC           |
|                                           |              |                         | TTTC                            |                                 |                                |
| Rickettsia-like organism                  | rlo          | 25.2                    | GGCTCAACCCAAGAAGTCTT            | GTGCAACAGCGTCAGTACT             | CCCAGATAACCGCTTCGCCTCCG        |
| <i>Candidatus Syngnamydia salmonis</i>    | sch          | 27.9                    | GGGTAGCCCGATATCTTCAAAGT         | CCCATGAGCCGCTCTCTCT             | TCCTTCGGGACCTTAC               |
| <i>Tenacibaculum maritimum</i>            | te_mar       |                         | TGCCTTCTACAGAGGATAGCC           | CTATCGTTGCCATGGTAAGCCG          | CACTTTGGAATGGCATCG             |
| <i>Vibrio anguillarum</i>                 | vi_ang       | 26.4                    | CCGTCATGCTATCTAGAGATGTA         | CCATACGCAGCCAAAATCA             | TCATTTGACGAGCGTCTTGTTCAGC      |
|                                           |              |                         | TTTGA                           |                                 |                                |
| <i>Vibrio salmonicida</i>                 | vi_sal       | 25.8                    | GTGTGATGACCGTTCCATATTT          | GCTATTGTCATCACTCTGTTTCTT        | TCGCTTCATGTTGTGTAATTAGGAGCGA   |
| <i>Yersinia ruckeri</i>                   | ye_ruc       | 25.8                    | TGCCGCGTGTGTGAAGAA              | ACGGAGTTAGCCGGTGCTT             | AATAGCACTGAACATTGAC            |
| <i>Dermocystidium salmonis</i>            | de_sal       | 25.5                    | CAGCCAATCCTTTCGCTTCT            | GACGGACGCACACCACAGT             | AAGCGCGTGTGCC                  |
| <i>Ichthyophonus hoferi</i>               | ic_hof       | 24.2                    | GTCTGTACTGGTACGGCAGTTTC         | TCCCGAACTCAGTAGACACTCAA         | TAAGAGCACCCACTGCCTTCGAGAAGA    |
| <i>Sphaerothecum destruens</i>            | sp_des       | 26.5                    | GGGTATCCTTCTCTCGAAATTG          | CCCAAACCTCGACGCACACT            | CGTGTGCGCTTAAT                 |
| <i>Facilispora margolisi</i>              | fa_mar       | 30.6                    | AGGAAGGAGCACGCAAGAAC            | CGCGTGCAGCCCAGTAC               | TCAGTGATGCCCTCAGA              |
| <i>Loma salmonae</i>                      | lo_sal       | 25.4                    | GGAGTCGCAGCGAAGATAGC            | CTTTTCCTCCCTTACTCATA            | TGCCTGAAATCACGAGAGTGAGACTACCC  |
|                                           |              |                         |                                 | TGCTT                           |                                |

|                                                                            |         |      |                                 |                                 |                                  |
|----------------------------------------------------------------------------|---------|------|---------------------------------|---------------------------------|----------------------------------|
| <i>Nucleospora salmonis</i>                                                | nuc_sal | 26.1 | GCCGCAGATCATTACTAAAAA<br>CCT    | CGATCGCCGCATCTAAACA             | CCCCGCGCATCCAGAAATACGC           |
| <i>Paranucleospora theridion</i><br>(syn. <i>Desmozoon lepeophtherii</i> ) | pa_ther | 28.2 | CGGACAGGGAGCATGGTATAG           | GGTCCAGGTTGGGTCTTGAG            | TTGGCGAAGAATGAAA                 |
| <i>Ceratonova shasta</i>                                                   | ce_sha  | 28.5 | CCAGCTTGAGATTAGCTCGGTAA         | CCCCGGAACCCGAAAAG               | CGAGCCAAGTTGGTCTCTCCGTGA<br>AAAC |
| <i>Kudoa thyristes</i>                                                     | ku_thy  | 26.2 | TGGCGGCCAAATCTAGGTT             | GACCGCACACAAGAAGTTAATCC         | TATCGCGAGAGCCGC                  |
| <i>Myxobolus arcticus</i>                                                  | my_arc  | 26.8 | TGGTAGATACTGAATATCCGG<br>GTTT   | AACTGCGCGGTCAAAGTTG             | CGTTGATTGTGAGGTTGG               |
| <i>Myxobolus cerebalis</i>                                                 | my_cer  | 26.2 | GCCATTGAATTTGACTTTGG<br>ATTA    | ACCATTCATGTAAGCCGAACT           | TCGAAGCCTTGACCATCTTTTGCC         |
| <i>Myxobolus insidiosus</i>                                                | my_ins  | 26.4 | CCAATTTGGGAGCGTCAAA             | CGATCGGCAAAGTTATCTAG<br>ATCA    | CTCTCAAGGCATTAT                  |
| <i>Parvicapsula kabatai</i>                                                | pa_kab  | 25.6 | CGACCATCTGCACGGTACTG            | ACACCACAACCTCTGCCTTCCA          | CTTCGGGTAGGTCCGG                 |
| <i>Parvicapsula minibicornis</i>                                           | pa_min  | 29.6 | AATAGTTGTTTGTCTGTGCAC<br>TCTGT  | CCGATAGGCTATCCAGTACCT<br>AGTAAG | TGTCCACCTAGTAAGGC                |
| <i>Parvicapsula pseudobranchicola</i>                                      | pa_pse  | 25.2 | CAGCTCCAGTAGTGATTTCA            | TTGAGCACTCTGCTTTATTCAA          | CGTATTGCTGTCTTTGACATGCAGT        |
| <i>Tetracapsuloides bryosalmonae</i>                                       | te_bry  | 25.0 | GCGAGATTTGTTGCATTTAA<br>AAAG    | GCACATGCAGTGCCAATCG             | CAAAATTGTGGAACCGTCCGACTACGA      |
| <i>Gyrodactylus salaris</i>                                                | gy_sal  | 26.4 | CGATCGTCACTCGGAATCG             | GGTGGCGCACCTATTCTACA            | TCTTATTAACCAGTTCTGC              |
| <i>Nanophyetus salmincola</i>                                              | na_sal  | 24.3 | GATCTGCATTTGGTTCTGTAACA         | CCAACGCCACAATGATAGCTATAC        | TGAGGCGTGTTTTATG                 |
| <i>Cryptobia salmositica</i>                                               | cr_sal  | 24.3 | TCAGTGCCTTTCAGGACATC            | GAGGCATCCACTCCAATAGAC           | AGGAGGACATGGCAGCCTTTGTAT         |
| <i>Ichthyophthirius multifiliis</i>                                        | ic_mul  | 23.7 | AAATGGGCATACGTTTGCAA<br>ATTTTT  | AACCTGCCTGAAACACTCTA            | ACTCGGCCTTCACTGGTTGACTTGG        |
| <i>Neoparamoeba perurans</i>                                               | ne_per  | 25.4 | GTTCTTTTCGGGAGCTGGGAG           | GAACATATCGCCGGCACAAAAG          | CAATGCCATTCTTTTCGGA              |
| <i>Spironucleus salmonicida</i>                                            | sp_sal  | 26.1 | GCAGCCCGGGTAATTC                | CGAACTTTTTAACTGCAGCAACA         | ACACGGAGAGTATTCT                 |
| Atlantic salmon calicivirus virus                                          | ascv    |      | ACCGACTGCCCGGTTGT               | CTTAGGGTTAAAGCAGTCG             | CTCCGATTGCCTGTGATAATACC          |
| Atlantic salmon paramyxovirus                                              | aspv    | 26.2 | CCCATATTAGCAAATGAGCTCT<br>ATCTT | CGTTAAGGAACATCATCTG<br>AGCTT    | AGCCCTTTTGTCTGCG                 |
| Chinook aquareovirus                                                       | reov    |      | AACTTTTCGGCTTTCTGCTATGC         | GAGGACAAGGGTCTCCATCTGA          | TTAATTGCGGTACTGCTC               |
| Cutthroat trout virus 2                                                    | ctv     |      | CCACTTGTCTGCTACGATGAAAC         | ATGCCGGGCCATC                   | CGCCTCCTTTGCCTTTCTC              |

|                                            |                |      |                                 |                                   |                          |
|--------------------------------------------|----------------|------|---------------------------------|-----------------------------------|--------------------------|
| Erythrocytic necrosis virus                | ven            | 24.9 | CGTAGGGCCCCAATAGTTTCT           | GGAGGAAATGCAGACAAGATTTG           | TCTTGCCGTTATTTCCAGCACCCG |
| Infectious hematopoietic necrosis virus    | ihnv           | 27.6 | AGAGCCAAGGCACTGTGCG             | TTCTTTGCGGCTTGTTGA                | TGAGACTGAGCGGGACA        |
| Infectious pancreatic necrosis virus       | ipnv           | 27.6 | GCAACTTACTTGAGATCCAT<br>TATGCT  | AGACCTCTAAGTTGTATGAC<br>GAGGTCTCT | CGAGAATGGGCCAGCAAGCA     |
| Infectious salmon anemia virus 7           | isa7           | 27.0 | TGGGATCATGTGTTTCTGCTA           | GAAATCCATGTTCTCA GATG-<br>CAA     | CACATGACCCCTCGTC         |
| Infectious salmon anemia virus 8           | isa8           | 26.1 | TGGGCAATGGTGTATGGTATGA          | GAAGTCGATGAACTGCAGCGA             | CAGGATGCAGATGTATGC       |
| Pacific salmon nidovirus                   | cov            |      | GGATAATCCCAACCGAAAAGTTT         | GCATGAAATGTTGTCTCGGT<br>TTAA      | CGATCCCGATTATC           |
| Pacific salmon parvovirus                  | pspv           | 26.4 | CCCTCAGGCTCCGATTTTTAT           | CGAAGACAACATGGAGGTGACA            | CAATTGGAGGCAACTGTA       |
| Piscine myocarditis virus                  | pmcv           | 26.3 | TTCCAAACAATTTCGAGAAGCG          | ACCTGCCATTTCCCTCTT                | CCGGGTAAAGTATTTGCGTC     |
| Piscine orthoreovirus                      | PRv            | 26.1 | TGCTAACACTCCAGGAGTCATTG         | TGAATCCGCTGCAGATGAGTA             | CGCCGGTAGCTCT            |
| Putative narna-like virus                  | pnarna         |      | TGTCCCTGAAGATTCATTTCGA          | TCCTAGGTGATGATATAAT               | CTATGTAAAGCCTCGTCCGTGAT  |
| Putative RNA virus 1                       | smallUK        |      | GTACCTAATTTAACTGGAACAG<br>TAGAC | TGCAACAGGCAAGTGATAT<br>GCTTGA     | CGTTCAGTAACACAAGTATCCAAA |
| Putative toti-like virus                   | toti           |      | TCTGCGCGCTGCACCTA               | CAAGTGCTACACTGCG                  | ATGCGGAGGAACTCACACT      |
| Rainbow trout orthomyxovirus               | ortho          |      | GGAAGCAGTGGACGCTAACC            | TCGCGAAGGTCTCTCAATGTC             | ATTCTTCTCATCAAAGGCA      |
| Salmon alphavirus                          | sav            | 26.3 | CCGGCCCTGAACCAGTT               | GTAGCCAAGTGGGAGAAAGCT             | TCGAAGTGGTGGCCAG         |
| Salmon gill pox virus                      | sgpx           |      | ATCCAAAATACGGAACATAAGCAAT       | CAACGACAAGGAGATCAACGC             | CTCAGAACTTCAAAGGA        |
| Salmonid herpesvirus                       | shv            | 26.6 | GCCTGGACCACAATCTCAATG           | CGAGACAGTGTGGCAAGACAAC            | CCAACAGGATGGTCATTA       |
| Salmon pescarenavirus 1                    | arena1         |      | CCTGCCTCTTTGCTCATTGTG           | AGAAAAGCTGTGGTACTTT<br>AGAAAAGC   | ATCCGCCTAACGGTTGG        |
| Salmon pescarenavirus 2                    | arena2         |      | AACATGAAGGGCGATTCGTT            | CAGCCCGCGACTGAGT                  | CAAGTGATGTAAGCTTG        |
| Viral encephalopathy and retinopathy virus | ver            | 26.2 | TTCCAGCGATACGCTGTTGA            | CACCGCCCGTGTTC                    | AAATTCAGCCAATGTGCCCC     |
| Viral hemorrhagic septicemia virus         | vhsv           | 26.9 | ATGAGGCAGGTGTCCGAGG             | TGTAGTAGGACTCTCCCAG<br>CATCC      | TACGCCATCATGATGAGT       |
| 78d16.1                                    | reference gene | NA   | GTCAAGACTGGAGGCTCAGAG           | GATCAAGCCCCAGAAGTGTTG             | AAGGTGATTCCCTCGCGTCCGA   |
| COIL-P84-2                                 | reference gene | NA   | GCTCATTTGAGGAGAAGGA<br>GGATG    | CTGGCGATGCTGTTCTGAG               | TTATCAAGCAGCAAGCC        |

MRPL40

reference gene

NA

CCCAGTATGAGGCACCTGAAGG

GTTAATGCTGCCACCCTCTCAC

ACAACAACATCACCA

---



Table S2: Coded-wire tagged (CWT) stocks were matched to Conservation Units (CUs, Fisheries and Oceans Canada 2009) and their constituent populations as determined by genetic stock identification (GSI, Beacham et al. 2006, 2020). Location of CWT stocks are displayed in Figure ???. Superscript for CUs indicate the information source for matches of CWTs to CUs (<sup>1</sup> = (DFO 2018), <sup>2</sup> = (Brown et al. 2020)). Where superscripts are not present, the authors determined which CWTs to match with CUs. An asterisk indicates that the CU was created by the authors for categorization (all in United States populations) but do not represent previously recognized CUs or other groupings. For Chinook, boldface CWT abbreviations indicate that the yearling, stream-type life history is dominant for a CWT stock.

| CWT stock name | CWT        | Conservation Unit matched                                        | GSI Populations matched                |
|----------------|------------|------------------------------------------------------------------|----------------------------------------|
|                | Abbrev.    |                                                                  |                                        |
| <b>Chinook</b> |            |                                                                  |                                        |
| Atnarko        | <b>ATN</b> | Bella Coola-Bentinck <sup>1</sup>                                | Atnarko                                |
|                |            | Homathko_SU_x.x <sup>2</sup>                                     | Homathko                               |
|                |            | Klinaklini_SU_1.3 <sup>2</sup>                                   | Devereux, Klinaklini                   |
| Big Qualicum   | BQR        | East Vancouver Island-Qualicum and Puntledge_FA_0.x <sup>2</sup> | Big Qualicum, L<br>Qualicum, Puntledge |
|                |            | Southern Mainland-Georgia Strai_FA_0.x <sup>2</sup>              | Squamish, Porteau Cove,<br>Cheakamus   |
| Cowichan       | COW        | East Vancouver Island-Cowichan and Koksilah_FA_0.x <sup>2</sup>  | Cowichan                               |

|             |            |                                                          |                                                                              |
|-------------|------------|----------------------------------------------------------|------------------------------------------------------------------------------|
| Green       | GRN        | Puget Sound*                                             | Soos Creek Hatchery, Snohomish River                                         |
| Harrison    | HAR        | Lower Fraser River_FA_0.3 <sup>1</sup>                   | Chilliwack, Harrison                                                         |
| Kitsumkalum | <b>KLM</b> | Kalum_late_timing <sup>1</sup>                           | Kitsumkalum R                                                                |
|             |            | Lower Skeena <sup>1</sup>                                | Exchamsiks, Kasiks R, Skeena at Terrace                                      |
|             |            | Middle Skeena-large lakes <sup>1</sup>                   | Bear, Morice                                                                 |
|             |            | Middle Skeena-mainstem tributaries <sup>1</sup>          | Kispiox, Kitwanga, Nangeese, Slamgeesh                                       |
|             |            | Portland Sound-Observatory Inlet-Lower Nass <sup>1</sup> | Ishkheenickh, Kateen, Kwinamass                                              |
|             |            | Upper Skeena <sup>1</sup>                                | Sustut                                                                       |
| Nicola      | <b>NIC</b> | Lower Thompson_SP_1.2 <sup>2</sup>                       | Bonaparte, Coldwater, Deadman, L Thompson, Louis, Nicola, Spius, U Coldwater |

|           |            |                                                              |                                                                                                                                                           |
|-----------|------------|--------------------------------------------------------------|-----------------------------------------------------------------------------------------------------------------------------------------------------------|
|           |            | South Thompson-Bessette Creek_SU_1.2 <sup>2</sup>            | Bessette                                                                                                                                                  |
| Nooksack  | <b>NSF</b> | Nooksack River*                                              | Nooksack SP                                                                                                                                               |
| Phillips  | PHI        | Southern Mainland-Southern Fjords_FA_0.x <sup>2</sup>        | Bute, Phillips                                                                                                                                            |
| Quinsam   | QUI        | East Vancouver Island-North_FA_0.x <sup>2</sup>              | Nimpkish, Quinsam, Woss<br>Lake                                                                                                                           |
| Robertson | RBT        | West Vancouver Island-Nootka and Kyuquot_FA_0.x <sup>2</sup> | Conuma, Gold River,<br>Kaouk River, Tahsis, Tlu-<br>pana, Zeballos                                                                                        |
|           |            | West Vancouver Island-North_FA_0.x <sup>2</sup>              | Colonial Cay, Marble,<br>Bedwell, Cypre, Kennedy,<br>Moyeha, Nahmint, Niti-<br>nat, Robertson, San Juan,<br>Sarita, Stamp, Thornton,<br>Toquart, Tranquil |
| Samish    | SAM        | Boundary Bay_FA_0.3 <sup>2</sup>                             | Little Campbell, Serpen-<br>tine                                                                                                                          |

|               |     |                                    |                                            |
|---------------|-----|------------------------------------|--------------------------------------------|
| Lower Shuswap | SHU | Shuswap River_SU_0.3 <sup>2</sup>  | Lower Shuswap, Middle Shuswap              |
|               |     | South Thompson_SU_0.3 <sup>2</sup> | Lower Adams, Little River, South Thompson  |
| Skagit        | SSF | Skagit River*                      | Skagit, Stillaguamish                      |
| Stikine       | STI | Stikine_early timing <sup>1</sup>  | Andrew Creek, Little Tahltan, Shakes Creek |
|               |     | Stikine_late <sup>1</sup>          | Verrett                                    |

**Coho**

|         |     |                     |                               |
|---------|-----|---------------------|-------------------------------|
| Bingham | BHC | Coastal Washington* | Queets, Bingham Ck, Raimie Ck |
|---------|-----|---------------------|-------------------------------|

|                 |     |                                                                         |                                                                                                                |
|-----------------|-----|-------------------------------------------------------------------------|----------------------------------------------------------------------------------------------------------------|
| Big Qualicum    | BQR | East Vancouver Island-Georgia Strait                                    | Big Qualicum, Black,<br>Cowichan, Goldstream,<br>Puntledge, Quinsam,<br>Rosewall                               |
| Inch Creek      | INC | Lower Fraser                                                            | Chehalis, Chilliwack,<br>Coquitlam, Hicks, Inch,<br>Kanaka, Nathan, Norrish,<br>Pitt, Stave, Widgeon           |
| Interior Fraser | IFR | Lower Thompson<br>North Thompson<br><br>South Thompson<br>Fraser Canyon | Coldwater<br>Barriere, Birch Is-<br>land, Dunn, Mann,<br>Reg_Christie<br>Harbour, Momich, Salmon<br>Nahatlatch |
| Puyallup        | PUY | Southern Puget Sound*                                                   | Minter, Nisqually,<br>Puyallup, White                                                                          |

|           |     |                       |                                                                    |
|-----------|-----|-----------------------|--------------------------------------------------------------------|
| Robertson | RBT | Clayoquot             | Kennedy, Kootowis                                                  |
|           |     | Juan de Fuca-Pachena  | Dungeness, Nitinat,<br>Pachena, San Juan                           |
|           |     | Nahwitti Lowland      | Cluxewe, Goodspeed, Mar-<br>ble, Stephens, Washlawlis,<br>Waukwaas |
|           |     | West Vancouver Island | Conuma, Kitsuksis, Mag-<br>gie, Robertson                          |
| Skagit    | SKH | North Puget Sound*    | Jones, Nooksack, Skagit,<br>Stillaguamish                          |
| Skykomish | SYH | Hood Canal*           | Dewatto, Quilcene                                                  |
|           |     | Mid-Puget Sound*      | Grizzly, Skykomish                                                 |

Table S3: Number of Chinook salmon matched to each coded wire tag (CWT) stock in each ocean entry year for the spring-summer (April through August) and fall-winter (September through following March). A minimum of 10 fish were needed in a group to estimate pathogen prevalence for use in cohort survival models (groups used indicated in boldface).

| CWT stock            | 2008      | 2009       | 2010      | 2011      | 2012      | 2013       | 2014       | 2015       | 2016      | 2017 |
|----------------------|-----------|------------|-----------|-----------|-----------|------------|------------|------------|-----------|------|
| <b>Spring-Summer</b> |           |            |           |           |           |            |            |            |           |      |
| ATN                  | 0         | <b>10</b>  | <b>14</b> | 6         | 1         | 0          | <b>14</b>  | 0          | 0         | 0    |
| BQR                  | 0         | 0          | <b>53</b> | <b>18</b> | <b>18</b> | 1          | <b>16</b>  | 0          | 5         | 0    |
| COW                  | 0         | 0          | 0         | <b>23</b> | <b>22</b> | 4          | <b>452</b> | 0          | 1         | 0    |
| GRN                  | 0         | 1          | 5         | 1         | 1         | 0          | 2          | 0          | 0         | 0    |
| HAR                  | 0         | <b>10</b>  | 0         | 7         | 2         | 0          | 5          | 0          | 2         | 0    |
| KLM                  | 0         | 0          | 0         | 1         | 0         | 0          | 0          | 0          | 0         | 0    |
| NIC                  | 0         | 5          | <b>52</b> | <b>15</b> | <b>30</b> | 5          | <b>30</b>  | 0          | <b>12</b> | 0    |
| NSF                  | 0         | 0          | 4         | 0         | 0         | 0          | 1          | 0          | 1         | 0    |
| PHI                  | 0         | 0          | 0         | 0         | 0         | 0          | <b>14</b>  | 0          | 0         | 0    |
| QUI                  | 0         | 0          | 0         | 0         | 3         | <b>371</b> | <b>265</b> | <b>163</b> | 0         | 0    |
| RBT                  | 0         | 3          | 0         | 3         | 3         | 8          | 0          | <b>19</b>  | 0         | 0    |
| SAM                  | 1         | 0          | 4         | 0         | 0         | 0          | 0          | 0          | 0         | 0    |
| SHU                  | 0         | 2          | 4         | 0         | 5         | 1          | <b>17</b>  | 0          | <b>15</b> | 0    |
| SSF                  | 0         | 0          | 9         | 0         | 0         | 0          | 1          | 0          | 0         | 0    |
| STI                  | 1         | 0          | 0         | 0         | 0         | 0          | 0          | 0          | 0         | 0    |
| <b>Fall-Winter</b>   |           |            |           |           |           |            |            |            |           |      |
| ATN                  | <b>27</b> | 2          | 2         | 3         | 0         | <b>14</b>  | <b>12</b>  | 6          | 1         | 0    |
| BQR                  | <b>58</b> | <b>34</b>  | <b>54</b> | <b>11</b> | <b>44</b> | <b>23</b>  | <b>15</b>  | <b>31</b>  | <b>14</b> | 0    |
| COW                  | 0         | <b>22</b>  | 0         | <b>11</b> | 3         | 2          | <b>11</b>  | <b>16</b>  | <b>16</b> | 0    |
| GRN                  | <b>12</b> | <b>49</b>  | <b>33</b> | 4         | 7         | 3          | 0          | <b>29</b>  | 0         | 0    |
| HAR                  | 3         | 0          | 0         | 2         | <b>16</b> | 0          | 6          | <b>11</b>  | 5         | 0    |
| KLM                  | <b>19</b> | <b>27</b>  | <b>10</b> | 4         | 2         | 0          | 0          | 0          | 0         | 0    |
| NIC                  | <b>21</b> | <b>26</b>  | <b>17</b> | <b>11</b> | 4         | <b>14</b>  | <b>17</b>  | <b>14</b>  | <b>10</b> | 0    |
| NSF                  | 0         | 1          | 0         | 0         | 0         | 1          | 1          | 4          | 3         | 1    |
| PHI                  | 0         | 0          | 0         | 0         | 3         | 0          | <b>11</b>  | 6          | 0         | 0    |
| QUI                  | 3         | 2          | 0         | 0         | 5         | 2          | 5          | 2          | 1         | 0    |
| RBT                  | <b>84</b> | <b>183</b> | <b>45</b> | <b>37</b> | <b>46</b> | <b>21</b>  | <b>46</b>  | <b>25</b>  | <b>78</b> | 0    |
| SAM                  | 6         | 2          | 0         | 0         | 0         | 0          | 0          | 0          | 0         | 0    |
| SHU                  | <b>44</b> | <b>20</b>  | <b>37</b> | <b>45</b> | <b>48</b> | <b>13</b>  | <b>73</b>  | <b>63</b>  | <b>51</b> | 0    |
| SKS                  | 0         | 2          | 0         | 0         | 0         | 0          | 0          | 0          | 0         | 0    |
| SSF                  | 3         | <b>12</b>  | 4         | 0         | 4         | 0          | 0          | 0          | 0         | 0    |
| STI                  | <b>59</b> | <b>35</b>  | <b>40</b> | 0         | 0         | 0          | 0          | 0          | 0         | 0    |

Table S4: Number of Coho salmon matched to each coded wire tag stock in each ocean entry year for the spring-summer (April through August) and fall-winter (September through following March). A minimum of 10 fish were needed in a group to estimate pathogen prevalence for use in cohort survival models (groups used indicated in boldface).

| CWT stock            | 2008 | 2009      | 2010      | 2011      | 2012      | 2013      | 2014      | 2015      | 2016      |
|----------------------|------|-----------|-----------|-----------|-----------|-----------|-----------|-----------|-----------|
| <b>Spring-Summer</b> |      |           |           |           |           |           |           |           |           |
| BHC                  | 0    | 1         | 5         | 8         | 0         | 3         | 0         | <b>15</b> | 0         |
| BQR                  | 0    | 1         | 9         | <b>20</b> | 1         | 8         | <b>31</b> | <b>18</b> | <b>15</b> |
| IFR                  | 0    | 0         | 4         | 5         | 0         | 0         | 8         | 8         | <b>12</b> |
| INC                  | 0    | 0         | <b>17</b> | <b>20</b> | 2         | 3         | <b>63</b> | <b>26</b> | <b>20</b> |
| PUY                  | 0    | 0         | 2         | 1         | 0         | 4         | 2         | 3         | 0         |
| RBT                  | 0    | <b>17</b> | 0         | 0         | <b>25</b> | 3         | 3         | 6         | 0         |
| SKH                  | 0    | 0         | <b>13</b> | 5         | 1         | 4         | <b>30</b> | 9         | 0         |
| SYH                  | 0    | 0         | 2         | 1         | 3         | 6         | 5         | 7         | 0         |
| <b>Fall-Winter</b>   |      |           |           |           |           |           |           |           |           |
| BHC                  | 0    | 0         | 4         | 0         | 2         | 2         | 1         | 0         | 0         |
| BQR                  | 0    | 5         | 9         | 8         | <b>16</b> | <b>35</b> | <b>23</b> | <b>13</b> | 7         |
| IFR                  | 0    | 0         | 7         | <b>10</b> | 6         | <b>13</b> | <b>12</b> | 8         | 3         |
| INC                  | 4    | 6         | 9         | <b>27</b> | <b>22</b> | <b>58</b> | <b>38</b> | <b>20</b> | 9         |
| PUY                  | 2    | 5         | 6         | 2         | 3         | 6         | 4         | 1         | 0         |
| RBT                  | 0    | <b>15</b> | 0         | 0         | <b>15</b> | <b>12</b> | 6         | 3         | 0         |
| SKH                  | 1    | <b>16</b> | 8         | 8         | 8         | <b>22</b> | <b>22</b> | <b>12</b> | 0         |
| SYH                  | 0    | 4         | <b>11</b> | 2         | 7         | <b>13</b> | 8         | 4         | 0         |



Table S5: Spring-summer / fall-winter sample size by JAZ and ocean entry year for Chinook mass deviation analysis. Full names for JAZ abbreviations can be found in Fisheries and Oceans Canada (2009).

|                    | 2008 | 2009  | 2010  | 2011  | 2012  | 2013   | 2014   | 2015  | 2016  | 2017 | 2018 |
|--------------------|------|-------|-------|-------|-------|--------|--------|-------|-------|------|------|
| BB+GStr            | 1/6  | 0/2   | 4/0   | 0/0   | 0/0   | 0/0    | 0/0    | 0/0   | 0/0   | 0/0  | 0/0  |
| BCD+HStr           | 0/35 | 0/0   | 0/2   | 6/3   | 1/0   | 0/0    | 11/10  | 0/4   | 0/0   | 0/0  | 0/0  |
| COWA <sup>a</sup>  | 1/0  | 0/2   | 0/3   | 0/0   | 0/0   | 0/0    | 0/0    | 0/0   | 0/1   | 0/0  | 0/0  |
| CR-PO <sup>a</sup> | 38/7 | 61/12 | 40/6  | 23/2  | 30/1  | 19/5   | 0/2    | 0/9   | 0/3   | 0/0  | 0/0  |
| EVI+GStr           | 0/61 | 1/60  | 40/60 | 26/24 | 30/57 | 376/24 | 656/31 | 39/48 | 6/30  | 0/46 | 17/0 |
| HK+SFj             | 0/0  | 10/2  | 14/0  | 0/0   | 0/0   | 0/14   | 3/2    | 0/2   | 0/1   | 0/0  | 0/0  |
| LFR+GStr           | 0/10 | 7/5   | 8/2   | 5/3   | 1/17  | 3/0    | 9/6    | 0/13  | 2/6   | 0/19 | 1/0  |
| LILL+GStr          | 0/0  | 1/0   | 0/0   | 1/0   | 3/0   | 1/0    | 3/0    | 0/0   | 0/0   | 0/0  | 2/0  |
| LNR-P+NSKEst       | 0/14 | 0/10  | 0/8   | 0/0   | 0/0   | 0/0    | 0/0    | 0/0   | 0/0   | 0/0  | 0/0  |
| LSK+NSKEst         | 0/0  | 0/0   | 0/2   | 1/4   | 0/1   | 0/0    | 0/0    | 0/0   | 0/0   | 0/0  | 0/0  |
| LStk+TBFj          | 1/59 | 0/35  | 0/40  | 0/0   | 0/0   | 0/0    | 0/0    | 0/0   | 0/0   | 0/0  | 0/0  |
| MFR+GStr           | 0/3  | 5/4   | 44/6  | 41/11 | 81/14 | 18/8   | 43/7   | 0/6   | 20/4  | 0/19 | 29/0 |
| NC+HStr            | 1/18 | 0/22  | 1/0   | 0/0   | 0/19  | 0/0    | 33/6   | 0/0   | 0/0   | 0/0  | 0/0  |
| NTh+GStr           | 0/12 | 16/26 | 64/22 | 17/13 | 51/10 | 9/14   | 52/19  | 0/17  | 22/10 | 0/17 | 31/0 |
| ORCS <sup>a</sup>  | 0/0  | 0/4   | 1/0   | 0/0   | 0/0   | 0/0    | 0/0    | 0/0   | 0/0   | 0/0  | 0/0  |
| PS <sup>a</sup>    | 0/15 | 1/69  | 18/37 | 2/4   | 3/21  | 0/4    | 8/3    | 0/34  | 1/13  | 0/7  | 1/0  |
| RSI+HStr           | 0/7  | 0/4   | 0/9   | 0/2   | 0/4   | 0/6    | 1/1    | 0/12  | 0/0   | 0/0  | 0/0  |
| SC+GStr            | 1/3  | 18/16 | 15/0  | 0/0   | 0/0   | 0/3    | 2/0    | 0/2   | 0/2   | 0/0  | 1/0  |
| SC+SFj             | 0/11 | 0/0   | 0/0   | 0/0   | 0/3   | 0/0    | 14/0   | 0/2   | 0/2   | 0/0  | 0/0  |
| SR-SpSu            | 7/0  | 0/0   | 0/0   | 0/0   | 0/0   | 0/0    | 0/0    | 0/0   | 0/0   | 0/0  | 0/0  |
| STh+GStr           | 0/53 | 2/20  | 2/37  | 3/48  | 5/48  | 5/13   | 18/72  | 0/67  | 15/51 | 0/66 | 17/0 |
| UFR+GStr           | 0/2  | 0/5   | 16/3  | 31/9  | 47/16 | 7/14   | 45/16  | 0/20  | 27/4  | 0/34 | 31/0 |
| UNR+NSKEst         | 0/8  | 0/10  | 0/0   | 0/2   | 0/0   | 0/0    | 1/0    | 0/0   | 0/0   | 0/0  | 0/0  |
| USK+NSKEst         | 0/5  | 0/17  | 0/0   | 0/0   | 0/1   | 0/0    | 0/0    | 0/0   | 0/0   | 0/0  | 0/0  |
| Whtng+TBFj         | 0/23 | 0/14  | 0/0   | 0/0   | 0/0   | 0/0    | 0/0    | 0/0   | 0/0   | 0/0  | 0/0  |
| WVI+WQCI           | 0/18 | 0/80  | 0/20  | 3/24  | 2/45  | 0/0    | 0/1    | 0/0   | 0/17  | 0/0  | 0/0  |
| WVI+WVI            | 0/66 | 3/101 | 0/25  | 0/13  | 1/1   | 8/21   | 0/45   | 0/25  | 0/61  | 0/1  | 0/0  |

a = labels for “joint adaptive zones” created by the authors to accomodate populations originating outside British Columbia. COWA = Washington Coast, CR-PO =Columbia River, ORCS = Oregon Coast, PS = Puget Sound.

Table S6: Spring-summer / fall-winter sample size by JAZ and ocean entry year for Coho mass at length analysis. JAZ abbreviations explained in (Fisheries and Oceans Canada 2009).

|                   | 2008 | 2009 | 2010  | 2011  | 2012 | 2013  | 2014  | 2015  | 2016  |
|-------------------|------|------|-------|-------|------|-------|-------|-------|-------|
| BB+GStr           | 0/1  | 0/2  | 3/1   | 3/2   | 0/2  | 1/7   | 1/0   | 1/2   | 2/0   |
| EVI+GStr          | 0/0  | 1/5  | 9/9   | 20/8  | 1/16 | 8/35  | 31/23 | 18/14 | 15/7  |
| EVI+SFj           | 0/0  | 0/0  | 0/0   | 0/0   | 0/1  | 1/0   | 1/0   | 0/1   | 0/0   |
| FRCany+GStr       | 0/0  | 0/0  | 0/1   | 1/1   | 0/0  | 0/3   | 0/2   | 0/0   | 4/1   |
| HecLow+HStr       | 0/0  | 0/1  | 0/1   | 0/0   | 0/0  | 0/0   | 0/0   | 0/0   | 0/0   |
| HK+SFj            | 0/0  | 0/0  | 2/0   | 2/0   | 1/1  | 0/3   | 8/1   | 2/0   | 0/0   |
| LFR+GStr          | 0/4  | 0/6  | 17/9  | 20/27 | 2/22 | 3/58  | 63/38 | 26/20 | 20/9  |
| LILL+GStr         | 0/2  | 0/0  | 1/0   | 1/2   | 0/0  | 0/6   | 3/3   | 2/4   | 5/1   |
| LSK+NSKEst        | 0/0  | 0/0  | 0/0   | 0/0   | 0/1  | 0/0   | 0/0   | 0/0   | 0/0   |
| LTh+GStr          | 0/0  | 0/0  | 0/1   | 1/4   | 0/1  | 0/4   | 3/1   | 2/0   | 1/2   |
| MFR+GStr          | 0/0  | 0/1  | 0/0   | 1/0   | 0/1  | 0/4   | 1/2   | 1/2   | 1/2   |
| NC+HStr           | 0/0  | 0/0  | 2/0   | 1/0   | 1/0  | 0/0   | 0/1   | 0/0   | 0/0   |
| NTh+GStr          | 0/0  | 0/0  | 4/5   | 0/3   | 0/4  | 0/5   | 4/7   | 4/3   | 4/0   |
| ORCS <sup>a</sup> | 0/0  | 0/1  | 2/5   | 1/0   | 0/0  | 1/0   | 0/2   | 4/1   | 0/0   |
| PS <sup>a</sup>   | 0/3  | 0/25 | 17/25 | 7/12  | 4/18 | 14/41 | 37/34 | 20/17 | 23/1  |
| SC+GStr           | 0/3  | 0/3  | 13/9  | 7/4   | 2/10 | 3/33  | 31/34 | 16/11 | 15/16 |
| SC+SFj            | 0/1  | 0/2  | 4/0   | 0/2   | 0/1  | 0/6   | 8/4   | 3/1   | 2/5   |
| STh+GStr          | 0/0  | 0/0  | 0/0   | 3/2   | 0/1  | 0/1   | 1/2   | 2/5   | 3/0   |
| WACO <sup>a</sup> | 0/0  | 1/0  | 5/4   | 8/0   | 0/2  | 3/2   | 0/1   | 15/0  | 0/0   |
| WVI+WQCI          | 0/3  | 17/9 | 7/4   | 12/0  | 20/7 | 1/5   | 1/1   | 0/1   | 0/0   |
| WVI+WVI           | 0/2  | 0/6  | 6/17  | 7/0   | 5/7  | 1/7   | 1/5   | 6/1   | 0/0   |

a = labels for “joint adaptive zones” created by the authors to accommodate populations originating outside British Columbia. ORCS = Oregon Coast, PS = Puget Sound, WACO = Washington Coast.

## Supplementary Figures

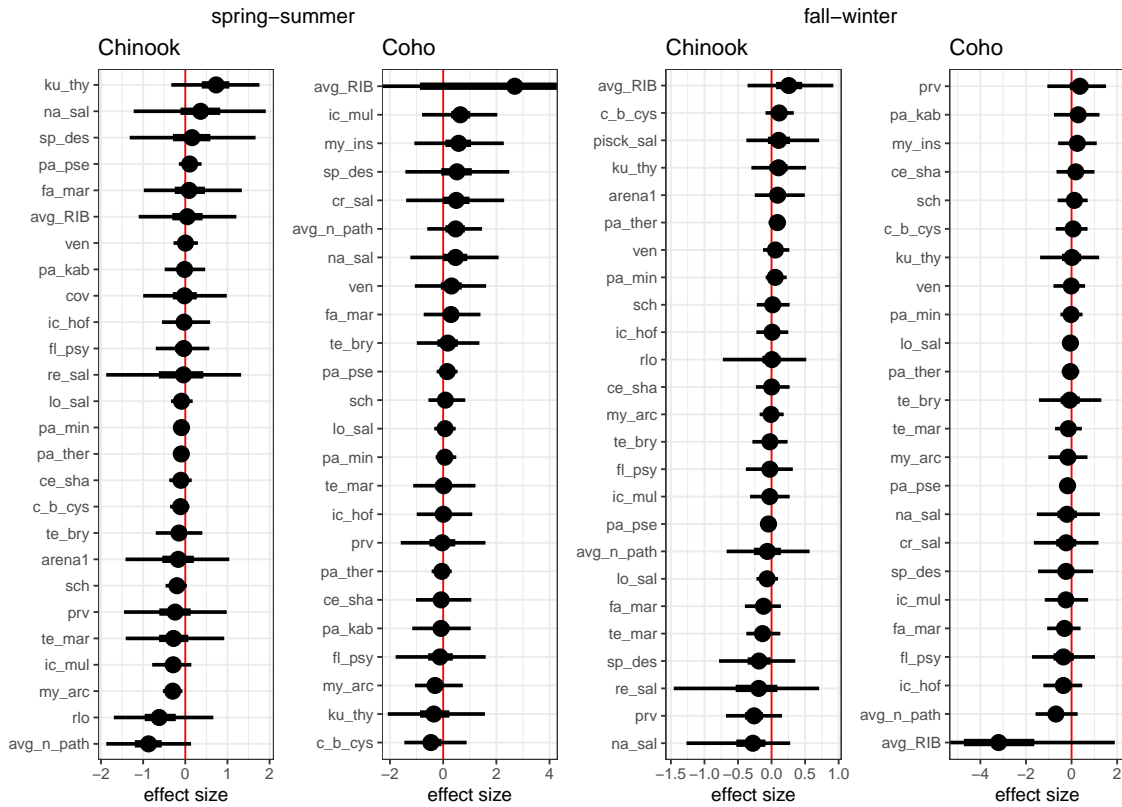

Figure S1: Dot-whisker plots depict model results from cohort survival models. Slope estimates for the association between pathogen prevalence and CWT-derived survival are presented (point = median estimate) with 50% (thick line), and 95% (thin line) credible intervals. Pathogen abbreviations can be found in Table S1.

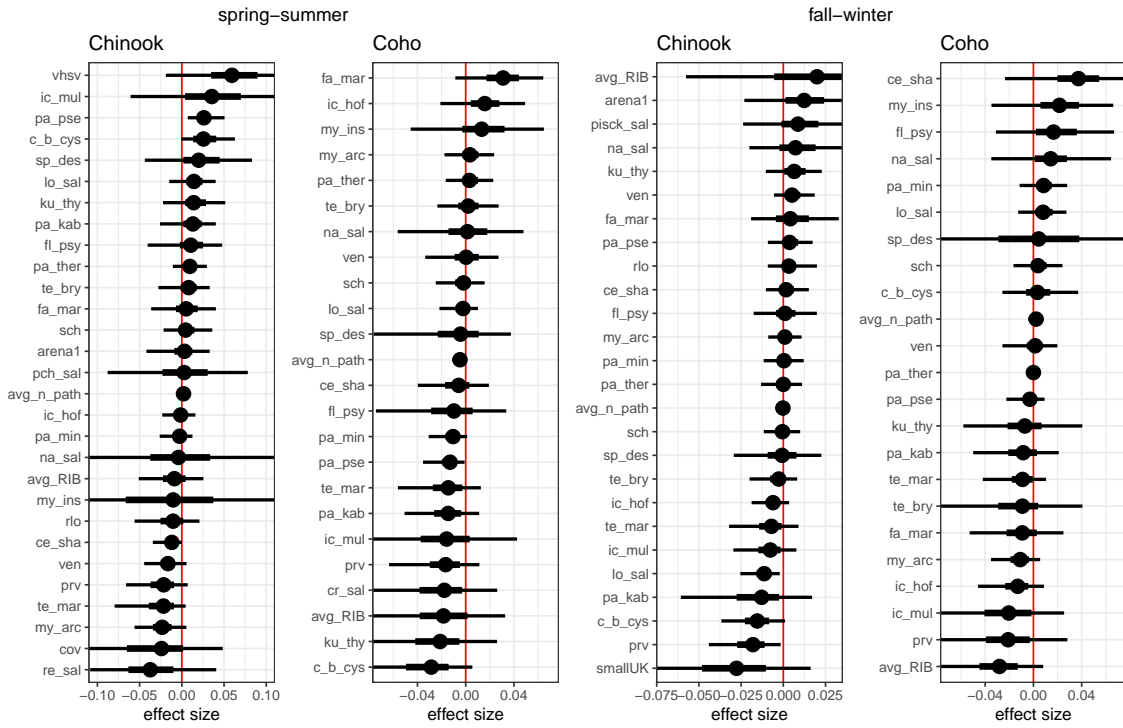

Figure S2: Dot-whisker plots depict model results from mass deviation models. Slope estimates for the association between pathogen load and mass while accounting for length are presented (point = median estimate) with 50% (thick line), and 95% (thin line) credible intervals. Pathogen abbreviations can be found in Table S1.

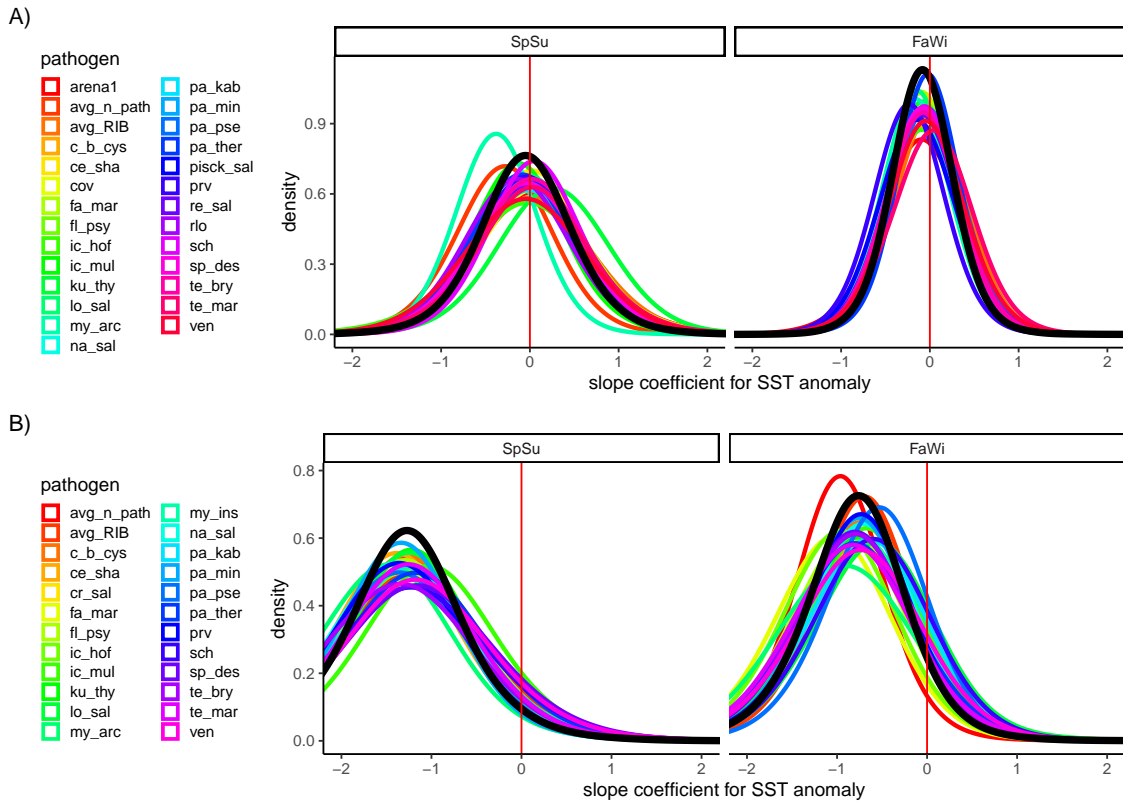

Figure S3: Posterior distributions of sea surface temperature anomaly from every cohort survival model for Chinook (A) and Coho (B) salmon. The heavy black line represents the mean of the distributions, which was created by sampling the posterior distribution from each pathogen model 5 000 times. Full names corresponding to pathogen abbreviations can be found in Table S1 (avg\_n\_path = average total number of pathogen taxa, avg\_RIB = average relative infectious agent burden).

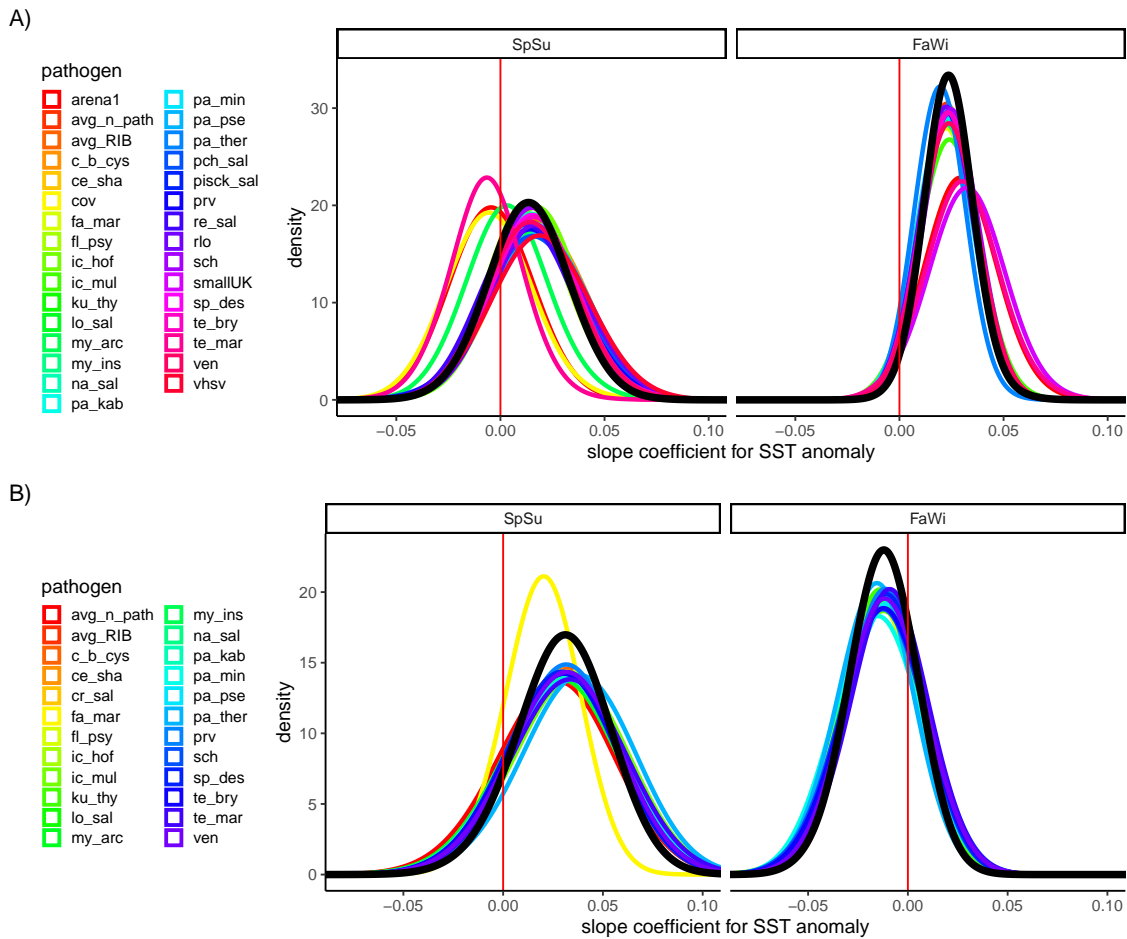

Figure S4: Posterior distributions of sea surface temperature anomaly from every mass deviation model for Chinook (A) and Coho (B) salmon. The heavy black line represents the mean of the distributions, which was created by sampling the posterior distribution from each pathogen model 5 000 times. Full names corresponding to pathogen abbreviations can be found in Table S1 (avg\_n\_path = average total number of pathogen taxa, avg\_RIB = average relative infectious agent burden).

## References

Beacham, T. D., Candy, J. R., Jonsen, K. L., Supernault, J., Wetklo, M., Deng, L., Miller, K. M., Withler, R. E., and Varnavskaya, N. (2006). Estimation of stock composition and individual identification of Chinook salmon across the Pacific Rim by use of microsatellite

- variation. *Transactions of the American Fisheries Society*, 135(4):861–888.
- Beacham, T. D., Wallace, C., Jonsen, K., McIntosh, B., Candy, J. R., Rondeau, E. B., Moore, J.-S., Bernatchez, L., and Withler, R. E. (2020). Accurate estimation of conservation unit contribution to coho salmon mixed-stock fisheries in British Columbia, Canada, using direct DNA sequencing for single nucleotide polymorphisms. *Canadian Journal of Fisheries and Aquatic Sciences*, 77(8):1302–1315.
- Brown, G. S., Thiess, M. E., Wor, C., Holt, C. A., Patten, B., Bailey, R. E., Parken, C. K., Baillie, S. J., Candy, J. R., Willis, D. M., Hertz, E., Connors, B., and Pestal, G. P. (2020). 2020 summary of abundance data for chinook salmon *Oncorhynchus tshawytscha* in Southern British Columbia, Canada. Can. Tech. Rep. Fish. Aquat. Sci. 3401: xiii+214 p.
- DFO (2018). Science information to support consultations on BC Chinook Salmon fishery management measures in 2018. DFO Can. Sci. Advis. Sec. Res. Doc. 2018/035.
- Di Cicco, E., Ferguson, H. W., Schulze, A. D., Kaukinen, K. H., Li, S., Vanderstichel, R., and et al. (2017). Heart and skeletal muscle inflammation (HSMI) disease diagnosed on a British Columbia salmon farm through a longitudinal farm study. *PLoS One*, 12(2):e0171471.
- Fisheries and Oceans Canada (2009). Framework for characterizing Conservation Units of Pacific salmon (*Oncorhynchus* spp.) for implementing the Wild Salmon Policy.
- Larionov, A., Krause, A., and Miller, W. (2005). A standard curve based method for relative real time PCR data processing. *BMC bioinformatics*, 6(1):62.
- Miller, K. M., Gardner, I. A., Vanderstichel, R., Burnley, T., Schulze, A. D., Li, S., Tabata,

- A., Kaukinen, K. H., Ming, T. J., and Ginther, N. G. (2016). Report on the performance evaluation of the Fluidigm BioMark platform for high-throughput microbe monitoring in salmon. DFO Can. Sci. Advis. Sec. Res. Doc. 2016/038. xi + 282 p.
- Miller, K. M., Günther, O. P., Li, S., Kaukinen, K. H., and Ming, T. J. (2017). Molecular indices of viral disease development in wild migrating salmon. *Conservation physiology*, 5(1).
- Mordecai, G. J., Miller, K. M., Di Cicco, E., Schulze, A. D., Kaukinen, K. H., Ming, T. J., Li, S., Tabata, A., Teffer, A., Patterson, D. A., et al. (2019). Endangered wild salmon infected by newly discovered viruses. *eLife*, 8.
- R Core Team (2019). *R: A Language and Environment for Statistical Computing*. R Foundation for Statistical Computing, Vienna, Austria.
- Thakur, K. K., Vanderstichel, R., Li, S., Laurin, E., Tucker, S., Neville, C., Tabata, A., and Miller, K. M. (2018). A comparison of infectious agents between hatchery-enhanced and wild out-migrating juvenile chinook salmon (*Oncorhynchus tshawytscha*) from Cowichan River, British Columbia. *FACETS*, 3(1):695–721.
